# Supplementary material for: Tissue and Temperature-Specific RNA-Seq Analysis Reveals Genomic Versatility and Adaptive Potential in Wild Sea Turtle Hatchlings (Caretta caretta)
Source: Animals (Basel). 2021 Oct 20;11(11):3013. doi: 10.3390/ani11113013 (PMC8614379; doi:10.3390/ani11113013)
Supplement: Supplementary file 1 [file animals-11-03013-s001.zip]

Archive with 6 entries (6 files):
- Supplemental File1.xlsx
- Supplemental File2.pdf
- Supplemental File3.pdf
- Supplemental File4.xlsx
- Supplemental File5.xlsx
- Supplemental File6.pdf
