# Supplementary material for: Tissue and Temperature-Specific RNA-Seq Analysis Reveals Genomic Versatility and Adaptive Potential in Wild Sea Turtle Hatchlings (Caretta caretta)
Source: Animals (Basel). 2021 Oct 20;11(11):3013. doi: 10.3390/ani11113013 (PMC8614379; doi:10.3390/ani11113013)
Supplement: Supplementary file 1 [file animals-11-03013-s001.zip › Supplemental File1.xlsx]

## Sheet: brain
Tags	GO ID	GO Name	GO Category	FDR	P-Value	Nr Test	Nr Reference	Non Annot Test	Non Annot Reference
[OVER]	GO:0050794	regulation of cellular process	BIOLOGICAL_PROCESS	0	0	1220	83	2409	4645
[OVER]	GO:0050789	regulation of biological process	BIOLOGICAL_PROCESS	0	0	1274	85	2355	4643
[OVER]	GO:0016020	membrane	CELLULAR_COMPONENT	0	0	1319	109	2310	4619
[OVER]	GO:0005488	binding	MOLECULAR_FUNCTION	0	0	2037	148	1592	4580
[OVER]	GO:0065007	biological regulation	BIOLOGICAL_PROCESS	0	0	1380	88	2249	4640
[OVER]	GO:0097159	organic cyclic compound binding	MOLECULAR_FUNCTION	0	0	1197	99	2432	4629
[OVER]	GO:0006807	nitrogen compound metabolic process	BIOLOGICAL_PROCESS	0	0	1432	138	2197	4590
[OVER]	GO:1901363	heterocyclic compound binding	MOLECULAR_FUNCTION	0	0	1191	99	2438	4629
[OVER]	GO:0005622	intracellular	CELLULAR_COMPONENT	0	0	1460	54	2169	4674
[OVER]	GO:0110165	cellular anatomical entity	CELLULAR_COMPONENT	0	0	2442	157	1187	4571
[OVER]	GO:0071704	organic substance metabolic process	BIOLOGICAL_PROCESS	0	0	1573	143	2056	4585
[OVER]	GO:0008152	metabolic process	BIOLOGICAL_PROCESS	0	0	1805	167	1824	4561
[OVER]	GO:0043167	ion binding	MOLECULAR_FUNCTION	0	0	1112	78	2517	4650
[OVER]	GO:0043170	macromolecule metabolic process	BIOLOGICAL_PROCESS	0	0	1369	137	2260	4591
[OVER]	GO:0043229	intracellular organelle	CELLULAR_COMPONENT	0	0	1276	47	2353	4681
[OVER]	GO:0043226	organelle	CELLULAR_COMPONENT	0	0	1332	48	2297	4680
[OVER]	GO:0043227	membrane-bounded organelle	CELLULAR_COMPONENT	0	0	1080	33	2549	4695
[OVER]	GO:0043231	intracellular membrane-bounded organelle	CELLULAR_COMPONENT	0	0	1029	26	2600	4702
[OVER]	GO:0009987	cellular process	BIOLOGICAL_PROCESS	0	0	2508	214	1121	4514
[OVER]	GO:0044238	primary metabolic process	BIOLOGICAL_PROCESS	0	0	1521	142	2108	4586
[OVER]	GO:0044237	cellular metabolic process	BIOLOGICAL_PROCESS	0	0	1544	143	2085	4585
[OVER]	GO:0003824	catalytic activity	MOLECULAR_FUNCTION	0	0	1503	136	2126	4592
[OVER]	GO:0031224	intrinsic component of membrane	CELLULAR_COMPONENT	1.9336868854323E-311	4.9603834893E-314	1062	87	2567	4641
[OVER]	GO:0016021	integral component of membrane	CELLULAR_COMPONENT	9.76961e-308	2.6151099054747E-310	1053	87	2576	4641
[OVER]	GO:1901564	organonitrogen compound metabolic process	BIOLOGICAL_PROCESS	6.26188e-295	1.74601e-297	930	49	2699	4679
[OVER]	GO:0005737	cytoplasm	CELLULAR_COMPONENT	6.70368e-292	1.94396e-294	830	18	2799	4710
[OVER]	GO:0044260	cellular macromolecule metabolic process	BIOLOGICAL_PROCESS	1.50917e-289	4.54467e-292	1078	120	2551	4608
[OVER]	GO:0050896	response to stimulus	BIOLOGICAL_PROCESS	2.63591e-284	8.2317e-287	888	43	2741	4685
[OVER]	GO:0019538	protein metabolic process	BIOLOGICAL_PROCESS	1.3724e-260	4.43893e-263	838	46	2791	4682
[OVER]	GO:0051716	cellular response to stimulus	BIOLOGICAL_PROCESS	5.14968e-251	1.72307e-253	798	40	2831	4688
[OVER]	GO:0005634	nucleus	CELLULAR_COMPONENT	7.08351e-250	2.44913e-252	735	20	2894	4708
[OVER]	GO:0005515	protein binding	MOLECULAR_FUNCTION	1.27366e-221	4.54574e-224	684	26	2945	4702
[OVER]	GO:0032991	protein-containing complex	CELLULAR_COMPONENT	3.23713e-221	1.19145e-223	689	28	2940	4700
[OVER]	GO:0044267	cellular protein metabolic process	BIOLOGICAL_PROCESS	1.2074e-220	4.5786e-223	705	34	2924	4694
[OVER]	GO:0034641	cellular nitrogen compound metabolic process	BIOLOGICAL_PROCESS	1.4251e-210	5.56306e-213	834	100	2795	4628
[OVER]	GO:0051179	localization	BIOLOGICAL_PROCESS	1.28725e-209	5.16854e-212	688	38	2941	4690
[OVER]	GO:0071840	cellular component organization or biogenesis	BIOLOGICAL_PROCESS	1.06912e-204	4.41194e-207	650	29	2979	4699
[OVER]	GO:0023052	signaling	BIOLOGICAL_PROCESS	2.0412e-200	8.65109e-203	667	39	2962	4689
[OVER]	GO:0016043	cellular component organization	BIOLOGICAL_PROCESS	2.03879e-198	8.86826e-201	628	27	3001	4701
[OVER]	GO:0007154	cell communication	BIOLOGICAL_PROCESS	1.63468e-197	7.29281e-200	670	43	2959	4685
[OVER]	GO:0003676	nucleic acid binding	MOLECULAR_FUNCTION	4.09529e-191	1.8727e-193	718	70	2911	4658
[OVER]	GO:0016787	hydrolase activity	MOLECULAR_FUNCTION	3.59244e-188	1.68283e-190	643	42	2986	4686
[OVER]	GO:0007165	signal transduction	BIOLOGICAL_PROCESS	5.22693e-188	2.50678e-190	632	38	2997	4690
[OVER]	GO:1901360	organic cyclic compound metabolic process	BIOLOGICAL_PROCESS	1.57343e-185	7.72151e-188	760	97	2869	4631
[OVER]	GO:0010467	gene expression	BIOLOGICAL_PROCESS	5.03491e-182	2.527e-184	637	46	2992	4682
[OVER]	GO:0006725	cellular aromatic compound metabolic process	BIOLOGICAL_PROCESS	1.53209e-181	7.86039e-184	749	97	2880	4631
[OVER]	GO:0043412	macromolecule modification	BIOLOGICAL_PROCESS	1.3006e-180	6.81779e-183	579	26	3050	4702
[OVER]	GO:0016740	transferase activity	MOLECULAR_FUNCTION	1.54224e-180	8.25645e-183	732	90	2897	4638
[OVER]	GO:0046483	heterocycle metabolic process	BIOLOGICAL_PROCESS	4.99126e-179	2.72777e-181	742	97	2887	4631
[OVER]	GO:0043168	anion binding	MOLECULAR_FUNCTION	1.17357e-178	6.54457e-181	610	39	3019	4689
[OVER]	GO:0006139	nucleobase-containing compound metabolic process	BIOLOGICAL_PROCESS	8.61962e-176	4.90297e-178	733	97	2896	4631
[OVER]	GO:0036094	small molecule binding	MOLECULAR_FUNCTION	6.85365e-174	3.9749e-176	600	40	3029	4688
[OVER]	GO:0006464	cellular protein modification process	BIOLOGICAL_PROCESS	9.1984e-169	5.53997e-171	548	26	3081	4702
[OVER]	GO:0036211	protein modification process	BIOLOGICAL_PROCESS	9.1984e-169	5.53997e-171	548	26	3081	4702
[OVER]	GO:0043169	cation binding	MOLECULAR_FUNCTION	7.40244e-165	4.54087e-167	608	53	3021	4675
[OVER]	GO:0046872	metal ion binding	MOLECULAR_FUNCTION	5.11687e-163	3.1959e-165	603	53	3026	4675
[OVER]	GO:0019222	regulation of metabolic process	BIOLOGICAL_PROCESS	1.29653e-162	8.24251e-165	585	46	3044	4682
[OVER]	GO:1901265	nucleoside phosphate binding	MOLECULAR_FUNCTION	3.30729e-162	2.17633e-164	561	37	3068	4691
[OVER]	GO:0000166	nucleotide binding	MOLECULAR_FUNCTION	3.30729e-162	2.17633e-164	561	37	3068	4691
[OVER]	GO:0043228	non-membrane-bounded organelle	CELLULAR_COMPONENT	1.24057e-161	8.44021e-164	508	19	3121	4709
[OVER]	GO:0043232	intracellular non-membrane-bounded organelle	CELLULAR_COMPONENT	1.24057e-161	8.44021e-164	508	19	3121	4709
[OVER]	GO:0051234	establishment of localization	BIOLOGICAL_PROCESS	7.11139e-161	4.91753e-163	560	38	3069	4690
[OVER]	GO:0090304	nucleic acid metabolic process	BIOLOGICAL_PROCESS	2.67427e-157	1.87908e-159	675	94	2954	4634
[OVER]	GO:0070013	intracellular organelle lumen	CELLULAR_COMPONENT	2.84881e-157	2.09705e-159	437	3	3192	4725
[OVER]	GO:0031974	membrane-enclosed lumen	CELLULAR_COMPONENT	2.84881e-157	2.09705e-159	437	3	3192	4725
[OVER]	GO:0043233	organelle lumen	CELLULAR_COMPONENT	2.84881e-157	2.09705e-159	437	3	3192	4725
[OVER]	GO:0006793	phosphorus metabolic process	BIOLOGICAL_PROCESS	2.23495e-156	1.69503e-158	540	35	3089	4693
[OVER]	GO:0006796	phosphate-containing compound metabolic process	BIOLOGICAL_PROCESS	2.23495e-156	1.69503e-158	540	35	3089	4693
[OVER]	GO:0006810	transport	BIOLOGICAL_PROCESS	1.41053e-154	1.08551e-156	543	38	3086	4690
[OVER]	GO:0032501	multicellular organismal process	BIOLOGICAL_PROCESS	8.87609e-153	6.9298e-155	465	13	3164	4715
[OVER]	GO:0009058	biosynthetic process	BIOLOGICAL_PROCESS	1.10917e-151	8.78332e-154	645	87	2984	4641
[OVER]	GO:0097367	carbohydrate derivative binding	MOLECULAR_FUNCTION	2.97475e-151	2.38883e-153	534	38	3095	4690
[OVER]	GO:0060255	regulation of macromolecule metabolic process	BIOLOGICAL_PROCESS	1.36407e-149	1.11061e-151	547	45	3082	4683
[OVER]	GO:0031323	regulation of cellular metabolic process	BIOLOGICAL_PROCESS	3.13235e-149	2.58525e-151	546	45	3083	4683
[OVER]	GO:1901576	organic substance biosynthetic process	BIOLOGICAL_PROCESS	6.85958e-149	5.738e-151	637	87	2992	4641
[OVER]	GO:0044249	cellular biosynthetic process	BIOLOGICAL_PROCESS	8.60491e-147	7.29393e-149	631	87	2998	4641
[OVER]	GO:0017076	purine nucleotide binding	MOLECULAR_FUNCTION	4.06353e-146	3.53508e-148	507	33	3122	4695
[OVER]	GO:0032555	purine ribonucleotide binding	MOLECULAR_FUNCTION	4.06353e-146	3.53508e-148	507	33	3122	4695
[OVER]	GO:0032553	ribonucleotide binding	MOLECULAR_FUNCTION	2.78057e-145	2.44998e-147	510	35	3119	4693
[OVER]	GO:0016070	RNA metabolic process	BIOLOGICAL_PROCESS	1.15669e-144	1.03207e-146	543	49	3086	4679
[OVER]	GO:0035639	purine ribonucleoside triphosphate binding	MOLECULAR_FUNCTION	4.65617e-142	4.20644e-144	496	33	3133	4695
[OVER]	GO:0080090	regulation of primary metabolic process	BIOLOGICAL_PROCESS	1.32823e-141	1.21475e-143	525	45	3104	4683
[OVER]	GO:0048518	positive regulation of biological process	BIOLOGICAL_PROCESS	1.4859e-141	1.37553e-143	401	4	3228	4724
[OVER]	GO:0140096	catalytic activity, acting on a protein	MOLECULAR_FUNCTION	4.20368e-141	3.93832e-143	496	34	3133	4694
[OVER]	GO:0031981	nuclear lumen	CELLULAR_COMPONENT	5.12912e-141	4.86254e-143	395	3	3234	4725
[OVER]	GO:0051171	regulation of nitrogen compound metabolic process	BIOLOGICAL_PROCESS	8.31048e-140	7.97124e-142	520	45	3109	4683
[OVER]	GO:0032502	developmental process	BIOLOGICAL_PROCESS	4.9401e-138	4.79354e-140	412	9	3217	4719
[OVER]	GO:0048522	positive regulation of cellular process	BIOLOGICAL_PROCESS	1.48764e-135	1.4601e-137	376	2	3253	4726
[OVER]	GO:0006996	organelle organization	BIOLOGICAL_PROCESS	5.60412e-133	5.56287e-135	435	20	3194	4708
[OVER]	GO:0048856	anatomical structure development	BIOLOGICAL_PROCESS	3.63804e-129	3.65184e-131	385	8	3244	4720
[OVER]	GO:0008144	drug binding	MOLECULAR_FUNCTION	1.11199e-125	1.12861e-127	438	28	3191	4700
[OVER]	GO:0016310	phosphorylation	BIOLOGICAL_PROCESS	3.84283e-123	3.94312e-125	439	31	3190	4697
[OVER]	GO:0005654	nucleoplasm	CELLULAR_COMPONENT	2.2115e-121	2.29388e-123	334	1	3295	4727
[OVER]	GO:0030554	adenyl nucleotide binding	MOLECULAR_FUNCTION	1.38751e-120	1.47014e-122	424	28	3205	4700
[OVER]	GO:0032559	adenyl ribonucleotide binding	MOLECULAR_FUNCTION	1.38751e-120	1.47014e-122	424	28	3205	4700
[OVER]	GO:0048519	negative regulation of biological process	BIOLOGICAL_PROCESS	6.09885e-119	6.53011e-121	358	8	3271	4720
[OVER]	GO:0005524	ATP binding	MOLECULAR_FUNCTION	2.54954e-117	2.75826e-119	415	28	3214	4700
[OVER]	GO:0009059	macromolecule biosynthetic process	BIOLOGICAL_PROCESS	2.38088e-115	2.60235e-117	533	84	3096	4644
[OVER]	GO:0007275	multicellular organism development	BIOLOGICAL_PROCESS	5.98362e-114	6.60694e-116	341	7	3288	4721
[OVER]	GO:0044271	cellular nitrogen compound biosynthetic process	BIOLOGICAL_PROCESS	2.33315e-111	2.60222e-113	521	84	3108	4644
[OVER]	GO:0034645	cellular macromolecule biosynthetic process	BIOLOGICAL_PROCESS	1.05164e-109	1.18465e-111	516	84	3113	4644
[OVER]	GO:0048523	negative regulation of cellular process	BIOLOGICAL_PROCESS	1.11857e-101	1.27252e-103	312	8	3317	4720
[OVER]	GO:0010468	regulation of gene expression	BIOLOGICAL_PROCESS	3.95267e-100	4.54077e-102	394	39	3235	4689
[OVER]	GO:0065008	regulation of biological quality	BIOLOGICAL_PROCESS	5.65708e-100	6.56186e-102	283	2	3346	4726
[OVER]	GO:0071944	cell periphery	CELLULAR_COMPONENT	1.80178e-99	2.11004e-101	326	14	3303	4714
[OVER]	GO:0048731	system development	BIOLOGICAL_PROCESS	2.52527e-99	2.98549e-101	302	7	3327	4721
[OVER]	GO:0033036	macromolecule localization	BIOLOGICAL_PROCESS	1.02607e-98	1.22451e-100	304	8	3325	4720
[OVER]	GO:0005886	plasma membrane	CELLULAR_COMPONENT	4.94823e-97	5.96039e-99	313	12	3316	4716
[OVER]	GO:0016301	kinase activity	MOLECULAR_FUNCTION	2.83644e-94	3.44827e-96	358	31	3271	4697
[OVER]	GO:0003677	DNA binding	MOLECULAR_FUNCTION	1.08284e-93	1.32849e-95	322	18	3307	4710
[OVER]	GO:0006950	response to stress	BIOLOGICAL_PROCESS	9.53715e-92	1.18071e-93	270	4	3359	4724
[OVER]	GO:0019219	regulation of nucleobase-containing compound metabolic process	BIOLOGICAL_PROCESS	1.72988e-90	2.16091e-92	366	39	3263	4689
[OVER]	GO:0044085	cellular component biogenesis	BIOLOGICAL_PROCESS	6.31329e-89	7.95674e-91	281	9	3348	4719
[OVER]	GO:0008104	protein localization	BIOLOGICAL_PROCESS	1.13417e-88	1.44207e-90	253	2	3376	4726
[OVER]	GO:0031326	regulation of cellular biosynthetic process	BIOLOGICAL_PROCESS	1.89387e-88	2.45024e-90	360	39	3269	4689
[OVER]	GO:0009889	regulation of biosynthetic process	BIOLOGICAL_PROCESS	1.89387e-88	2.45024e-90	360	39	3269	4689
[OVER]	GO:0009893	positive regulation of metabolic process	BIOLOGICAL_PROCESS	1.18376e-86	1.54472e-88	237	0	3392	4728
[OVER]	GO:0010556	regulation of macromolecule biosynthetic process	BIOLOGICAL_PROCESS	4.55025e-86	5.9885e-88	353	39	3276	4689
[OVER]	GO:0032774	RNA biosynthetic process	BIOLOGICAL_PROCESS	2.16223e-85	2.86979e-87	351	39	3278	4689
[OVER]	GO:0005829	cytosol	CELLULAR_COMPONENT	3.78376e-85	5.06415e-87	233	0	3396	4728
[OVER]	GO:0048869	cellular developmental process	BIOLOGICAL_PROCESS	3.91239e-85	5.27994e-87	260	6	3369	4722
[OVER]	GO:0051252	regulation of RNA metabolic process	BIOLOGICAL_PROCESS	1.00883e-84	1.37271e-86	349	39	3280	4689
[OVER]	GO:0051641	cellular localization	BIOLOGICAL_PROCESS	1.9534e-84	2.67977e-86	272	10	3357	4718
[OVER]	GO:0003723	RNA binding	MOLECULAR_FUNCTION	2.42685e-84	3.35633e-86	265	8	3364	4720
[OVER]	GO:0097659	nucleic acid-templated transcription	BIOLOGICAL_PROCESS	1.02646e-83	1.43105e-85	346	39	3283	4689
[OVER]	GO:0071702	organic substance transport	BIOLOGICAL_PROCESS	1.27764e-82	1.79548e-84	267	10	3362	4718
[OVER]	GO:0030154	cell differentiation	BIOLOGICAL_PROCESS	1.45505e-82	2.06103e-84	253	6	3376	4722
[OVER]	GO:0031325	positive regulation of cellular metabolic process	BIOLOGICAL_PROCESS	1.58281e-82	2.25964e-84	226	0	3403	4728
[OVER]	GO:0035556	intracellular signal transduction	BIOLOGICAL_PROCESS	1.73457e-82	2.49565e-84	249	5	3380	4723
[OVER]	GO:0012505	endomembrane system	CELLULAR_COMPONENT	2.86849e-82	4.15908e-84	266	10	3363	4718
[OVER]	GO:0016772	transferase activity, transferring phosphorus-containing groups	MOLECULAR_FUNCTION	2.87023e-82	4.19362e-84	401	68	3228	4660
[OVER]	GO:2000112	regulation of cellular macromolecule biosynthetic process	BIOLOGICAL_PROCESS	2.26999e-81	3.34194e-83	339	39	3290	4689
[OVER]	GO:0010604	positive regulation of macromolecule metabolic process	BIOLOGICAL_PROCESS	1.18327e-80	1.75525e-82	221	0	3408	4728
[OVER]	GO:0022607	cellular component assembly	BIOLOGICAL_PROCESS	1.63074e-80	2.4372e-82	251	7	3378	4721
[OVER]	GO:1901362	organic cyclic compound biosynthetic process	BIOLOGICAL_PROCESS	4.51245e-80	6.79435e-82	418	81	3211	4647
[OVER]	GO:0019438	aromatic compound biosynthetic process	BIOLOGICAL_PROCESS	2.18002e-79	3.30675e-81	414	80	3215	4648
[OVER]	GO:0051173	positive regulation of nitrogen compound metabolic process	BIOLOGICAL_PROCESS	3.72496e-79	5.69172e-81	217	0	3412	4728
[OVER]	GO:0006351	transcription, DNA-templated	BIOLOGICAL_PROCESS	4.95266e-79	7.62288e-81	332	39	3297	4689
[OVER]	GO:0048583	regulation of response to stimulus	BIOLOGICAL_PROCESS	6.54638e-79	1.01489e-80	243	6	3386	4722
[OVER]	GO:0018130	heterocycle biosynthetic process	BIOLOGICAL_PROCESS	3.20604e-78	5.00609e-80	412	81	3217	4647
[OVER]	GO:0042221	response to chemical	BIOLOGICAL_PROCESS	3.13296e-77	4.92691e-79	242	7	3387	4721
[OVER]	GO:0034654	nucleobase-containing compound biosynthetic process	BIOLOGICAL_PROCESS	2.6683e-76	4.22596e-78	404	80	3225	4648
[OVER]	GO:0006468	protein phosphorylation	BIOLOGICAL_PROCESS	1.10873e-75	1.76833e-77	254	12	3375	4716
[OVER]	GO:0071705	nitrogen compound transport	BIOLOGICAL_PROCESS	2.87272e-75	4.61378e-77	217	2	3412	4726
[OVER]	GO:1903506	regulation of nucleic acid-templated transcription	BIOLOGICAL_PROCESS	1.04097e-72	1.69509e-74	313	39	3316	4689
[OVER]	GO:2001141	regulation of RNA biosynthetic process	BIOLOGICAL_PROCESS	1.04097e-72	1.69509e-74	313	39	3316	4689
[OVER]	GO:0065009	regulation of molecular function	BIOLOGICAL_PROCESS	2.64833e-69	4.37155e-71	242	14	3387	4714
[OVER]	GO:0007166	cell surface receptor signaling pathway	BIOLOGICAL_PROCESS	2.64833e-69	4.37155e-71	242	14	3387	4714
[OVER]	GO:0023051	regulation of signaling	BIOLOGICAL_PROCESS	2.90808e-69	4.83275e-71	213	5	3416	4723
[OVER]	GO:0051246	regulation of protein metabolic process	BIOLOGICAL_PROCESS	4.92768e-69	8.24395e-71	216	6	3413	4722
[OVER]	GO:0005856	cytoskeleton	CELLULAR_COMPONENT	6.44375e-69	1.08522e-70	238	13	3391	4715
[OVER]	GO:1902494	catalytic complex	CELLULAR_COMPONENT	9.92802e-69	1.68309e-70	222	8	3407	4720
[OVER]	GO:0010646	regulation of cell communication	BIOLOGICAL_PROCESS	1.53412e-68	2.6179e-70	211	5	3418	4723
[OVER]	GO:1901566	organonitrogen compound biosynthetic process	BIOLOGICAL_PROCESS	1.66981e-68	2.86807e-70	218	7	3411	4721
[OVER]	GO:0006355	regulation of transcription, DNA-templated	BIOLOGICAL_PROCESS	4.1271e-68	7.13474e-70	299	39	3330	4689
[OVER]	GO:0009892	negative regulation of metabolic process	BIOLOGICAL_PROCESS	4.16426e-68	7.24543e-70	206	4	3423	4724
[OVER]	GO:0045184	establishment of protein localization	BIOLOGICAL_PROCESS	9.70223e-67	1.69892e-68	194	2	3435	4726
[OVER]	GO:0006508	proteolysis	BIOLOGICAL_PROCESS	1.86683e-66	3.28975e-68	250	20	3379	4708
[OVER]	GO:0051649	establishment of localization in cell	BIOLOGICAL_PROCESS	2.44421e-66	4.33448e-68	212	7	3417	4721
[OVER]	GO:0032268	regulation of cellular protein metabolic process	BIOLOGICAL_PROCESS	5.37973e-66	9.60023e-68	204	5	3425	4723
[OVER]	GO:0070727	cellular macromolecule localization	BIOLOGICAL_PROCESS	1.22907e-65	2.20701e-67	191	2	3438	4726
[OVER]	GO:0034613	cellular protein localization	BIOLOGICAL_PROCESS	2.87016e-65	5.18588e-67	190	2	3439	4726
[OVER]	GO:0042886	amide transport	BIOLOGICAL_PROCESS	6.66038e-65	1.21827e-66	189	2	3440	4726
[OVER]	GO:0033554	cellular response to stress	BIOLOGICAL_PROCESS	6.66038e-65	1.21827e-66	189	2	3440	4726
[OVER]	GO:0015833	peptide transport	BIOLOGICAL_PROCESS	1.55483e-64	2.86134e-66	188	2	3441	4726
[OVER]	GO:0015031	protein transport	BIOLOGICAL_PROCESS	8.46857e-64	1.57735e-65	186	2	3443	4726
[OVER]	GO:0006928	movement of cell or subcellular component	BIOLOGICAL_PROCESS	8.46857e-64	1.57735e-65	186	2	3443	4726
[OVER]	GO:0010605	negative regulation of macromolecule metabolic process	BIOLOGICAL_PROCESS	5.3906e-63	1.01006e-64	192	4	3437	4724
[OVER]	GO:0016462	pyrophosphatase activity	MOLECULAR_FUNCTION	3.00512e-62	5.73138e-64	219	13	3410	4715
[OVER]	GO:0016817	hydrolase activity, acting on acid anhydrides	MOLECULAR_FUNCTION	3.00512e-62	5.73138e-64	219	13	3410	4715
[OVER]	GO:0016818	hydrolase activity, acting on acid anhydrides, in phosphorus-containing anhydrides	MOLECULAR_FUNCTION	3.00512e-62	5.73138e-64	219	13	3410	4715
[OVER]	GO:0048513	animal organ development	BIOLOGICAL_PROCESS	5.84366e-62	1.12102e-63	181	2	3448	4726
[OVER]	GO:0009056	catabolic process	BIOLOGICAL_PROCESS	7.44839e-61	1.44548e-62	200	8	3429	4720
[OVER]	GO:0009653	anatomical structure morphogenesis	BIOLOGICAL_PROCESS	7.44839e-61	1.44359e-62	178	2	3451	4726
[OVER]	GO:0017111	nucleoside-triphosphatase activity	MOLECULAR_FUNCTION	7.49699e-61	1.46328e-62	215	13	3414	4715
[OVER]	GO:0051239	regulation of multicellular organismal process	BIOLOGICAL_PROCESS	1.02034e-60	2.00289e-62	173	1	3456	4727
[OVER]	GO:0009966	regulation of signal transduction	BIOLOGICAL_PROCESS	1.44963e-60	2.86176e-62	189	5	3440	4723
[OVER]	GO:0032879	regulation of localization	BIOLOGICAL_PROCESS	1.31492e-59	2.61047e-61	170	1	3459	4727
[OVER]	GO:0050793	regulation of developmental process	BIOLOGICAL_PROCESS	7.23442e-59	1.4443e-60	168	1	3461	4727
[OVER]	GO:0046907	intracellular transport	BIOLOGICAL_PROCESS	9.38123e-59	1.88336e-60	184	5	3445	4723
[OVER]	GO:0070887	cellular response to chemical stimulus	BIOLOGICAL_PROCESS	1.35858e-58	2.74261e-60	176	3	3453	4725
[OVER]	GO:0019899	enzyme binding	MOLECULAR_FUNCTION	2.29885e-58	4.66641e-60	193	8	3436	4720
[OVER]	GO:0031324	negative regulation of cellular metabolic process	BIOLOGICAL_PROCESS	2.82169e-58	5.75919e-60	179	4	3450	4724
[OVER]	GO:0046914	transition metal ion binding	MOLECULAR_FUNCTION	5.24631e-58	1.07665e-59	204	12	3425	4716
[OVER]	GO:0016773	phosphotransferase activity, alcohol group as acceptor	MOLECULAR_FUNCTION	1.32198e-56	2.72772e-58	200	12	3429	4716
[OVER]	GO:0006396	RNA processing	BIOLOGICAL_PROCESS	9.90138e-56	2.05404e-57	172	4	3457	4724
[OVER]	GO:0044248	cellular catabolic process	BIOLOGICAL_PROCESS	1.37068e-55	2.85876e-57	182	7	3447	4721
[OVER]	GO:0006366	transcription by RNA polymerase II	BIOLOGICAL_PROCESS	3.5279e-55	7.39734e-57	158	1	3471	4727
[OVER]	GO:0051172	negative regulation of nitrogen compound metabolic process	BIOLOGICAL_PROCESS	5.20964e-55	1.09817e-56	170	4	3459	4724
[OVER]	GO:0050790	regulation of catalytic activity	BIOLOGICAL_PROCESS	6.09424e-55	1.29144e-56	198	13	3431	4715
[OVER]	GO:0031090	organelle membrane	CELLULAR_COMPONENT	3.62999e-54	7.73286e-56	178	7	3451	4721
[OVER]	GO:0098772	molecular function regulator	MOLECULAR_FUNCTION	1.03208e-53	2.21012e-55	205	17	3424	4711
[OVER]	GO:0010033	response to organic substance	BIOLOGICAL_PROCESS	1.71259e-53	3.68649e-55	162	3	3467	4725
[OVER]	GO:0044281	small molecule metabolic process	BIOLOGICAL_PROCESS	2.12494e-52	4.59779e-54	159	3	3470	4725
[OVER]	GO:1901575	organic substance catabolic process	BIOLOGICAL_PROCESS	5.80225e-51	1.26192e-52	169	7	3460	4721
[OVER]	GO:0005215	transporter activity	MOLECULAR_FUNCTION	7.72751e-51	1.68926e-52	194	16	3435	4712
[OVER]	GO:0006357	regulation of transcription by RNA polymerase II	BIOLOGICAL_PROCESS	5.07419e-50	1.1149e-51	144	1	3485	4727
[OVER]	GO:0043933	protein-containing complex subunit organization	BIOLOGICAL_PROCESS	7.43654e-50	1.64224e-51	152	3	3477	4725
[OVER]	GO:0051128	regulation of cellular component organization	BIOLOGICAL_PROCESS	1.2537e-49	2.78258e-51	162	6	3467	4722
[OVER]	GO:0055085	transmembrane transport	BIOLOGICAL_PROCESS	3.80598e-49	8.48981e-51	189	16	3440	4712
[OVER]	GO:0043603	cellular amide metabolic process	BIOLOGICAL_PROCESS	1.65387e-48	3.70765e-50	152	4	3477	4724
[OVER]	GO:0006974	cellular response to DNA damage stimulus	BIOLOGICAL_PROCESS	4.85644e-48	1.09413e-49	143	2	3486	4726
[OVER]	GO:0004672	protein kinase activity	MOLECULAR_FUNCTION	6.03188e-48	1.36568e-49	175	12	3454	4716
[OVER]	GO:0048584	positive regulation of response to stimulus	BIOLOGICAL_PROCESS	3.92182e-47	9.0544e-49	131	0	3498	4728
[OVER]	GO:0031328	positive regulation of cellular biosynthetic process	BIOLOGICAL_PROCESS	3.92182e-47	9.0544e-49	131	0	3498	4728
[OVER]	GO:0045935	positive regulation of nucleobase-containing compound metabolic process	BIOLOGICAL_PROCESS	3.92182e-47	9.0544e-49	131	0	3498	4728
[OVER]	GO:0009891	positive regulation of biosynthetic process	BIOLOGICAL_PROCESS	3.92182e-47	9.0544e-49	131	0	3498	4728
[OVER]	GO:0022857	transmembrane transporter activity	MOLECULAR_FUNCTION	4.93574e-47	1.14503e-48	175	13	3454	4715
[OVER]	GO:0007399	nervous system development	BIOLOGICAL_PROCESS	8.55155e-47	1.99339e-48	154	6	3475	4722
[OVER]	GO:0040011	locomotion	BIOLOGICAL_PROCESS	9.9295e-47	2.32567e-48	135	1	3494	4727
[OVER]	GO:0048468	cell development	BIOLOGICAL_PROCESS	1.3089e-46	3.08027e-48	143	3	3486	4725
[OVER]	GO:0120025	plasma membrane bounded cell projection	CELLULAR_COMPONENT	1.33909e-46	3.18119e-48	139	2	3490	4726
[OVER]	GO:0042995	cell projection	CELLULAR_COMPONENT	1.33909e-46	3.18119e-48	139	2	3490	4726
[OVER]	GO:0007010	cytoskeleton organization	BIOLOGICAL_PROCESS	1.99444e-46	4.76031e-48	165	10	3464	4718
[OVER]	GO:0044093	positive regulation of molecular function	BIOLOGICAL_PROCESS	5.19701e-46	1.24621e-47	145	4	3484	4724
[OVER]	GO:0071310	cellular response to organic substance	BIOLOGICAL_PROCESS	6.80234e-46	1.63875e-47	141	3	3488	4725
[OVER]	GO:0051276	chromosome organization	BIOLOGICAL_PROCESS	2.55343e-45	6.17996e-47	156	8	3473	4720
[OVER]	GO:0010557	positive regulation of macromolecule biosynthetic process	BIOLOGICAL_PROCESS	2.67163e-45	6.49583e-47	126	0	3503	4728
[OVER]	GO:0065003	protein-containing complex assembly	BIOLOGICAL_PROCESS	3.56495e-45	8.70761e-47	139	3	3490	4725
[OVER]	GO:0006811	ion transport	BIOLOGICAL_PROCESS	3.82958e-45	9.3967e-47	172	14	3457	4714
[OVER]	GO:0007049	cell cycle	BIOLOGICAL_PROCESS	3.96401e-45	9.77076e-47	164	11	3465	4717
[OVER]	GO:0010628	positive regulation of gene expression	BIOLOGICAL_PROCESS	1.44774e-44	3.58464e-46	124	0	3505	4728
[OVER]	GO:0008270	zinc ion binding	MOLECULAR_FUNCTION	1.51574e-44	3.7699e-46	165	12	3464	4716
[OVER]	GO:0006629	lipid metabolic process	BIOLOGICAL_PROCESS	4.25896e-44	1.06403e-45	136	3	3493	4725
[OVER]	GO:0031399	regulation of protein modification process	BIOLOGICAL_PROCESS	8.14764e-44	2.04463e-45	127	1	3502	4727
[OVER]	GO:0005739	mitochondrion	CELLULAR_COMPONENT	1.0533e-43	2.65499e-45	131	2	3498	4726
[OVER]	GO:0016788	hydrolase activity, acting on ester bonds	MOLECULAR_FUNCTION	1.58654e-43	4.01679e-45	162	12	3467	4716
[OVER]	GO:0006886	intracellular protein transport	BIOLOGICAL_PROCESS	2.41756e-43	6.1477e-45	130	2	3499	4726
[OVER]	GO:0060089	molecular transducer activity	MOLECULAR_FUNCTION	5.39336e-43	1.38353e-44	173	17	3456	4711
[OVER]	GO:0038023	signaling receptor activity	MOLECULAR_FUNCTION	5.39336e-43	1.38353e-44	173	17	3456	4711
[OVER]	GO:0016192	vesicle-mediated transport	BIOLOGICAL_PROCESS	8.5938e-43	2.21411e-44	165	14	3464	4714
[OVER]	GO:0048870	cell motility	BIOLOGICAL_PROCESS	2.3105e-42	6.03007e-44	123	1	3506	4727
[OVER]	GO:0010629	negative regulation of gene expression	BIOLOGICAL_PROCESS	2.3105e-42	6.00031e-44	118	0	3511	4728
[OVER]	GO:0051674	localization of cell	BIOLOGICAL_PROCESS	2.3105e-42	6.03007e-44	123	1	3506	4727
[OVER]	GO:0008233	peptidase activity	MOLECULAR_FUNCTION	2.71059e-42	7.10448e-44	166	15	3463	4713
[OVER]	GO:2000026	regulation of multicellular organismal development	BIOLOGICAL_PROCESS	5.32594e-42	1.40444e-43	122	1	3507	4727
[OVER]	GO:0051254	positive regulation of RNA metabolic process	BIOLOGICAL_PROCESS	5.32594e-42	1.40782e-43	117	0	3512	4728
[OVER]	GO:0043604	amide biosynthetic process	BIOLOGICAL_PROCESS	5.93333e-42	1.57499e-43	130	3	3499	4725
[OVER]	GO:0018193	peptidyl-amino acid modification	BIOLOGICAL_PROCESS	6.96234e-42	1.8559e-43	140	6	3489	4722
[OVER]	GO:0009605	response to external stimulus	BIOLOGICAL_PROCESS	1.23377e-41	3.30254e-43	116	0	3513	4728
[OVER]	GO:0005694	chromosome	CELLULAR_COMPONENT	4.97291e-41	1.33668e-42	131	4	3498	4724
[OVER]	GO:0006518	peptide metabolic process	BIOLOGICAL_PROCESS	7.06767e-41	1.90762e-42	127	3	3502	4725
[OVER]	GO:0008219	cell death	BIOLOGICAL_PROCESS	8.03208e-41	2.17689e-42	123	2	3506	4726
[OVER]	GO:0008092	cytoskeletal protein binding	MOLECULAR_FUNCTION	3.52742e-40	9.59949e-42	144	9	3485	4719
[OVER]	GO:1903508	positive regulation of nucleic acid-templated transcription	BIOLOGICAL_PROCESS	3.63923e-40	9.98495e-42	112	0	3517	4728
[OVER]	GO:1902680	positive regulation of RNA biosynthetic process	BIOLOGICAL_PROCESS	3.63923e-40	9.98495e-42	112	0	3517	4728
[OVER]	GO:0015630	microtubule cytoskeleton	CELLULAR_COMPONENT	3.92835e-40	1.0822e-41	141	8	3488	4720
[OVER]	GO:0023056	positive regulation of signaling	BIOLOGICAL_PROCESS	8.42739e-40	2.34042e-41	111	0	3518	4728
[OVER]	GO:0010647	positive regulation of cell communication	BIOLOGICAL_PROCESS	8.42739e-40	2.34042e-41	111	0	3518	4728
[OVER]	GO:0055114	oxidation-reduction process	BIOLOGICAL_PROCESS	1.39186e-39	3.88093e-41	145	10	3484	4718
[OVER]	GO:0042592	homeostatic process	BIOLOGICAL_PROCESS	2.21125e-39	6.19032e-41	119	2	3510	4726
[OVER]	GO:0030030	cell projection organization	BIOLOGICAL_PROCESS	4.27199e-39	1.21022e-40	122	3	3507	4725
[OVER]	GO:0120036	plasma membrane bounded cell projection organization	BIOLOGICAL_PROCESS	4.27199e-39	1.21022e-40	122	3	3507	4725
[OVER]	GO:0043043	peptide biosynthetic process	BIOLOGICAL_PROCESS	4.27199e-39	1.21022e-40	122	3	3507	4725
[OVER]	GO:0016491	oxidoreductase activity	MOLECULAR_FUNCTION	4.45877e-39	1.26811e-40	135	7	3494	4721
[OVER]	GO:0051174	regulation of phosphorus metabolic process	BIOLOGICAL_PROCESS	2.27209e-38	6.5127e-40	112	1	3517	4727
[OVER]	GO:0019220	regulation of phosphate metabolic process	BIOLOGICAL_PROCESS	2.27209e-38	6.5127e-40	112	1	3517	4727
[OVER]	GO:0006412	translation	BIOLOGICAL_PROCESS	5.05151e-38	1.45359e-39	119	3	3510	4725
[OVER]	GO:0034622	cellular protein-containing complex assembly	BIOLOGICAL_PROCESS	5.23746e-38	1.51294e-39	111	1	3518	4727
[OVER]	GO:0042802	identical protein binding	MOLECULAR_FUNCTION	5.69633e-38	1.65185e-39	106	0	3523	4728
[OVER]	GO:0043085	positive regulation of catalytic activity	BIOLOGICAL_PROCESS	1.14273e-37	3.32648e-39	118	3	3511	4725
[OVER]	GO:0006915	apoptotic process	BIOLOGICAL_PROCESS	1.20247e-37	3.5138e-39	110	1	3519	4727
[OVER]	GO:0051247	positive regulation of protein metabolic process	BIOLOGICAL_PROCESS	1.31867e-37	3.86806e-39	105	0	3524	4728
[OVER]	GO:0012501	programmed cell death	BIOLOGICAL_PROCESS	1.37126e-37	4.03762e-39	114	2	3515	4726
[OVER]	GO:0030054	cell junction	CELLULAR_COMPONENT	2.18273e-37	6.45128e-39	133	8	3496	4720
[OVER]	GO:0022402	cell cycle process	BIOLOGICAL_PROCESS	2.37414e-37	7.04351e-39	130	7	3499	4721
[OVER]	GO:0002376	immune system process	BIOLOGICAL_PROCESS	2.55538e-37	7.60971e-39	117	3	3512	4725
[OVER]	GO:0009967	positive regulation of signal transduction	BIOLOGICAL_PROCESS	3.02977e-37	9.0562e-39	104	0	3525	4728
[OVER]	GO:0045595	regulation of cell differentiation	BIOLOGICAL_PROCESS	6.31274e-37	1.89396e-38	108	1	3521	4727
[OVER]	GO:0016071	mRNA metabolic process	BIOLOGICAL_PROCESS	1.32094e-36	3.97784e-38	115	3	3514	4725
[OVER]	GO:0031327	negative regulation of cellular biosynthetic process	BIOLOGICAL_PROCESS	1.63557e-36	4.96181e-38	102	0	3527	4728
[OVER]	GO:0009890	negative regulation of biosynthetic process	BIOLOGICAL_PROCESS	1.63557e-36	4.96181e-38	102	0	3527	4728
[OVER]	GO:0009057	macromolecule catabolic process	BIOLOGICAL_PROCESS	1.92381e-36	5.85768e-38	118	4	3511	4724
[OVER]	GO:0016477	cell migration	BIOLOGICAL_PROCESS	7.74121e-36	2.3657e-37	105	1	3524	4727
[OVER]	GO:0140110	transcription regulator activity	MOLECULAR_FUNCTION	8.21033e-36	2.51823e-37	139	12	3490	4716
[OVER]	GO:0003008	system process	BIOLOGICAL_PROCESS	1.20045e-35	3.69535e-37	119	5	3510	4723
[OVER]	GO:0044265	cellular macromolecule catabolic process	BIOLOGICAL_PROCESS	1.94566e-35	6.01103e-37	108	2	3521	4726
[OVER]	GO:0099080	supramolecular complex	CELLULAR_COMPONENT	2.20316e-35	6.83111e-37	115	4	3514	4724
[OVER]	GO:0004888	transmembrane signaling receptor activity	MOLECULAR_FUNCTION	2.8443e-35	8.85076e-37	147	16	3482	4712
[OVER]	GO:0007017	microtubule-based process	BIOLOGICAL_PROCESS	2.84933e-35	8.89818e-37	121	6	3508	4722
[OVER]	GO:0010558	negative regulation of macromolecule biosynthetic process	BIOLOGICAL_PROCESS	4.70971e-35	1.48656e-36	98	0	3531	4728
[OVER]	GO:0045934	negative regulation of nucleobase-containing compound metabolic process	BIOLOGICAL_PROCESS	4.70971e-35	1.48656e-36	98	0	3531	4728
[OVER]	GO:0032270	positive regulation of cellular protein metabolic process	BIOLOGICAL_PROCESS	4.70971e-35	1.48656e-36	98	0	3531	4728
[OVER]	GO:0005794	Golgi apparatus	CELLULAR_COMPONENT	4.88622e-35	1.54772e-36	114	4	3515	4724
[OVER]	GO:1901135	carbohydrate derivative metabolic process	BIOLOGICAL_PROCESS	7.76581e-35	2.4685e-36	110	3	3519	4725
[OVER]	GO:0070011	peptidase activity, acting on L-amino acid peptides	MOLECULAR_FUNCTION	9.76719e-35	3.11557e-36	143	15	3486	4713
[OVER]	GO:0048699	generation of neurons	BIOLOGICAL_PROCESS	9.92696e-35	3.1776e-36	106	2	3523	4726
[OVER]	GO:0051049	regulation of transport	BIOLOGICAL_PROCESS	1.0823e-34	3.47649e-36	97	0	3532	4728
[OVER]	GO:0022008	neurogenesis	BIOLOGICAL_PROCESS	1.08742e-34	3.50507e-36	113	4	3516	4724
[OVER]	GO:1990904	ribonucleoprotein complex	CELLULAR_COMPONENT	2.1123e-34	6.8321e-36	101	1	3528	4727
[OVER]	GO:0045893	positive regulation of transcription, DNA-templated	BIOLOGICAL_PROCESS	2.50458e-34	8.12886e-36	96	0	3533	4728
[OVER]	GO:0030234	enzyme regulator activity	MOLECULAR_FUNCTION	4.46367e-34	1.45371e-35	126	9	3503	4719
[OVER]	GO:0006281	DNA repair	BIOLOGICAL_PROCESS	5.13337e-34	1.67753e-35	104	2	3525	4726
[OVER]	GO:2000113	negative regulation of cellular macromolecule biosynthetic process	BIOLOGICAL_PROCESS	5.77597e-34	1.90042e-35	95	0	3534	4728
[OVER]	GO:0042325	regulation of phosphorylation	BIOLOGICAL_PROCESS	5.77597e-34	1.90042e-35	95	0	3534	4728
[OVER]	GO:1902531	regulation of intracellular signal transduction	BIOLOGICAL_PROCESS	8.85824e-34	2.92442e-35	107	3	3522	4725
[OVER]	GO:0009888	tissue development	BIOLOGICAL_PROCESS	2.56255e-33	8.48849e-35	98	1	3531	4727
[OVER]	GO:0015075	ion transmembrane transporter activity	MOLECULAR_FUNCTION	2.63148e-33	8.74616e-35	121	8	3508	4720
[OVER]	GO:0015318	inorganic molecular entity transmembrane transporter activity	MOLECULAR_FUNCTION	2.75186e-33	9.17697e-35	109	4	3520	4724
[OVER]	GO:0016604	nuclear body	CELLULAR_COMPONENT	3.10279e-33	1.03819e-34	93	0	3536	4728
[OVER]	GO:0098796	membrane protein complex	CELLULAR_COMPONENT	6.74713e-33	2.2651e-34	117	7	3512	4721
[OVER]	GO:0043565	sequence-specific DNA binding	MOLECULAR_FUNCTION	7.09742e-33	2.40341e-34	111	5	3518	4723
[OVER]	GO:0005509	calcium ion binding	MOLECULAR_FUNCTION	7.09742e-33	2.40644e-34	144	18	3485	4710
[OVER]	GO:0005576	extracellular region	CELLULAR_COMPONENT	7.09742e-33	2.40644e-34	144	18	3485	4710
[OVER]	GO:0022610	biological adhesion	BIOLOGICAL_PROCESS	1.24428e-32	4.23271e-34	119	8	3510	4720
[OVER]	GO:0008283	cell population proliferation	BIOLOGICAL_PROCESS	1.3643e-32	4.65622e-34	100	2	3529	4726
[OVER]	GO:0051253	negative regulation of RNA metabolic process	BIOLOGICAL_PROCESS	1.65531e-32	5.66788e-34	91	0	3538	4728
[OVER]	GO:0044877	protein-containing complex binding	MOLECULAR_FUNCTION	2.28588e-32	7.85245e-34	103	3	3526	4725
[OVER]	GO:1901565	organonitrogen compound catabolic process	BIOLOGICAL_PROCESS	3.06662e-32	1.05687e-33	106	4	3523	4724
[OVER]	GO:0070647	protein modification by small protein conjugation or removal	BIOLOGICAL_PROCESS	3.49185e-32	1.20731e-33	109	5	3520	4723
[OVER]	GO:0051336	regulation of hydrolase activity	BIOLOGICAL_PROCESS	5.11094e-32	1.77281e-33	125	11	3504	4717
[OVER]	GO:0007155	cell adhesion	BIOLOGICAL_PROCESS	5.87059e-32	2.04286e-33	117	8	3512	4720
[OVER]	GO:0030182	neuron differentiation	BIOLOGICAL_PROCESS	7.01221e-32	2.44794e-33	98	2	3531	4726
[OVER]	GO:0019637	organophosphate metabolic process	BIOLOGICAL_PROCESS	1.53519e-31	5.3764e-33	104	4	3525	4724
[OVER]	GO:0001932	regulation of protein phosphorylation	BIOLOGICAL_PROCESS	2.05542e-31	7.22124e-33	88	0	3541	4728
[OVER]	GO:0044255	cellular lipid metabolic process	BIOLOGICAL_PROCESS	3.64629e-31	1.28511e-32	96	2	3533	4726
[OVER]	GO:1990234	transferase complex	CELLULAR_COMPONENT	7.72e-31	2.72947e-32	102	4	3527	4724
[OVER]	GO:0031982	vesicle	CELLULAR_COMPONENT	1.85381e-30	6.57498e-32	107	6	3522	4722
[OVER]	GO:0010941	regulation of cell death	BIOLOGICAL_PROCESS	1.95265e-30	6.9473e-32	90	1	3539	4727
[OVER]	GO:0005102	signaling receptor binding	MOLECULAR_FUNCTION	9.0486e-30	3.22948e-31	105	6	3524	4722
[OVER]	GO:0006812	cation transport	BIOLOGICAL_PROCESS	1.95251e-29	6.99036e-31	98	4	3531	4724
[OVER]	GO:0098588	bounding membrane of organelle	CELLULAR_COMPONENT	2.0923e-29	7.51417e-31	101	5	3528	4723
[OVER]	GO:0034220	ion transmembrane transport	BIOLOGICAL_PROCESS	2.98998e-29	1.07714e-30	109	8	3520	4720
[OVER]	GO:1903507	negative regulation of nucleic acid-templated transcription	BIOLOGICAL_PROCESS	3.21972e-29	1.16709e-30	82	0	3547	4728
[OVER]	GO:1902679	negative regulation of RNA biosynthetic process	BIOLOGICAL_PROCESS	3.21972e-29	1.16709e-30	82	0	3547	4728
[OVER]	GO:0009719	response to endogenous stimulus	BIOLOGICAL_PROCESS	3.45455e-29	1.25606e-30	94	3	3535	4725
[OVER]	GO:0016887	ATPase activity	MOLECULAR_FUNCTION	4.5922e-29	1.67482e-30	100	5	3529	4723
[OVER]	GO:0006397	mRNA processing	BIOLOGICAL_PROCESS	7.77542e-29	2.84446e-30	93	3	3536	4725
[OVER]	GO:0005783	endoplasmic reticulum	CELLULAR_COMPONENT	1.73025e-28	6.34902e-30	80	0	3549	4728
[OVER]	GO:0004674	protein serine/threonine kinase activity	MOLECULAR_FUNCTION	2.14979e-28	7.91244e-30	95	4	3534	4724
[OVER]	GO:0007186	G protein-coupled receptor signaling pathway	BIOLOGICAL_PROCESS	2.19278e-28	8.09512e-30	121	14	3508	4714
[OVER]	GO:0051240	positive regulation of multicellular organismal process	BIOLOGICAL_PROCESS	3.98619e-28	1.48048e-29	79	0	3550	4728
[OVER]	GO:0045892	negative regulation of transcription, DNA-templated	BIOLOGICAL_PROCESS	3.98619e-28	1.48048e-29	79	0	3550	4728
[OVER]	GO:0043067	regulation of programmed cell death	BIOLOGICAL_PROCESS	6.50354e-28	2.42269e-29	83	1	3546	4727
[OVER]	GO:0051726	regulation of cell cycle	BIOLOGICAL_PROCESS	8.40816e-28	3.14157e-29	102	7	3527	4721
[OVER]	GO:0071495	cellular response to endogenous stimulus	BIOLOGICAL_PROCESS	8.78904e-28	3.29368e-29	90	3	3539	4725
[OVER]	GO:0009628	response to abiotic stimulus	BIOLOGICAL_PROCESS	9.18332e-28	3.45168e-29	78	0	3551	4728
[OVER]	GO:0007267	cell-cell signaling	BIOLOGICAL_PROCESS	1.32859e-27	5.00852e-29	86	2	3543	4726
[OVER]	GO:0042981	regulation of apoptotic process	BIOLOGICAL_PROCESS	1.47706e-27	5.58468e-29	82	1	3547	4727
[OVER]	GO:0048037	cofactor binding	MOLECULAR_FUNCTION	1.96302e-27	7.44396e-29	89	3	3540	4725
[OVER]	GO:0031410	cytoplasmic vesicle	CELLULAR_COMPONENT	2.17e-27	8.30149e-29	98	6	3531	4722
[OVER]	GO:0033043	regulation of organelle organization	BIOLOGICAL_PROCESS	2.17e-27	8.30149e-29	98	6	3531	4722
[OVER]	GO:0097708	intracellular vesicle	CELLULAR_COMPONENT	2.17e-27	8.30149e-29	98	6	3531	4722
[OVER]	GO:0005730	nucleolus	CELLULAR_COMPONENT	3.34462e-27	1.28697e-28	81	1	3548	4727
[OVER]	GO:0000902	cell morphogenesis	BIOLOGICAL_PROCESS	3.34462e-27	1.28697e-28	81	1	3548	4727
[OVER]	GO:0048585	negative regulation of response to stimulus	BIOLOGICAL_PROCESS	4.84557e-27	1.87532e-28	76	0	3553	4728
[OVER]	GO:0033365	protein localization to organelle	BIOLOGICAL_PROCESS	4.84557e-27	1.87532e-28	76	0	3553	4728
[OVER]	GO:0005929	cilium	CELLULAR_COMPONENT	7.63874e-27	2.96485e-28	80	1	3549	4727
[OVER]	GO:0048666	neuron development	BIOLOGICAL_PROCESS	3.47404e-26	1.35226e-27	82	2	3547	4726
[OVER]	GO:0008380	RNA splicing	BIOLOGICAL_PROCESS	4.02715e-26	1.57205e-27	78	1	3551	4727
[OVER]	GO:0070925	organelle assembly	BIOLOGICAL_PROCESS	4.93518e-26	1.93202e-27	85	3	3544	4725
[OVER]	GO:0030163	protein catabolic process	BIOLOGICAL_PROCESS	7.79868e-26	3.07911e-27	81	2	3548	4726
[OVER]	GO:0005815	microtubule organizing center	CELLULAR_COMPONENT	7.79868e-26	3.07911e-27	81	2	3548	4726
[OVER]	GO:0008324	cation transmembrane transporter activity	MOLECULAR_FUNCTION	7.79868e-26	3.07911e-27	81	2	3548	4726
[OVER]	GO:0080134	regulation of response to stress	BIOLOGICAL_PROCESS	9.13826e-26	3.6182e-27	77	1	3552	4727
[OVER]	GO:0042127	regulation of cell population proliferation	BIOLOGICAL_PROCESS	2.09666e-25	8.32491e-27	76	1	3553	4727
[OVER]	GO:0030029	actin filament-based process	BIOLOGICAL_PROCESS	2.78312e-25	1.11126e-26	86	4	3543	4724
[OVER]	GO:0051248	negative regulation of protein metabolic process	BIOLOGICAL_PROCESS	2.78312e-25	1.11126e-26	86	4	3543	4724
[OVER]	GO:0046983	protein dimerization activity	MOLECULAR_FUNCTION	4.78221e-25	1.9148e-26	75	1	3554	4727
[OVER]	GO:0000278	mitotic cell cycle	BIOLOGICAL_PROCESS	5.95543e-25	2.3912e-26	88	5	3541	4723
[OVER]	GO:0045944	positive regulation of transcription by RNA polymerase II	BIOLOGICAL_PROCESS	7.44096e-25	2.99597e-26	70	0	3559	4728
[OVER]	GO:0044257	cellular protein catabolic process	BIOLOGICAL_PROCESS	1.09047e-24	4.40276e-26	74	1	3555	4727
[OVER]	GO:0032446	protein modification by small protein conjugation	BIOLOGICAL_PROCESS	1.36428e-24	5.52347e-26	84	4	3545	4724
[OVER]	GO:0051130	positive regulation of cellular component organization	BIOLOGICAL_PROCESS	1.71334e-24	6.97488e-26	69	0	3560	4728
[OVER]	GO:0051094	positive regulation of developmental process	BIOLOGICAL_PROCESS	1.71334e-24	6.97488e-26	69	0	3560	4728
[OVER]	GO:0044087	regulation of cellular component biogenesis	BIOLOGICAL_PROCESS	2.47237e-24	1.012e-25	73	1	3556	4727
[OVER]	GO:0051603	proteolysis involved in cellular protein catabolic process	BIOLOGICAL_PROCESS	2.47237e-24	1.012e-25	73	1	3556	4727
[OVER]	GO:0099081	supramolecular polymer	CELLULAR_COMPONENT	2.981e-24	1.23017e-25	83	4	3546	4724
[OVER]	GO:0006325	chromatin organization	BIOLOGICAL_PROCESS	2.981e-24	1.23017e-25	83	4	3546	4724
[OVER]	GO:0099512	supramolecular fiber	CELLULAR_COMPONENT	2.981e-24	1.23017e-25	83	4	3546	4724
[OVER]	GO:0003690	double-stranded DNA binding	MOLECULAR_FUNCTION	3.92366e-24	1.62356e-25	68	0	3561	4728
[OVER]	GO:0032269	negative regulation of cellular protein metabolic process	BIOLOGICAL_PROCESS	6.5989e-24	2.73789e-25	82	4	3547	4724
[OVER]	GO:0035295	tube development	BIOLOGICAL_PROCESS	9.05847e-24	3.77857e-25	67	0	3562	4728
[OVER]	GO:0031401	positive regulation of protein modification process	BIOLOGICAL_PROCESS	9.05847e-24	3.77857e-25	67	0	3562	4728
[OVER]	GO:0031975	envelope	CELLULAR_COMPONENT	1.2703e-23	5.34132e-25	71	1	3558	4727
[OVER]	GO:0031967	organelle envelope	CELLULAR_COMPONENT	1.2703e-23	5.34132e-25	71	1	3558	4727
[OVER]	GO:0051270	regulation of cellular component movement	BIOLOGICAL_PROCESS	1.2703e-23	5.34132e-25	71	1	3558	4727
[OVER]	GO:0031175	neuron projection development	BIOLOGICAL_PROCESS	2.90913e-23	1.22647e-24	70	1	3559	4727
[OVER]	GO:0030036	actin cytoskeleton organization	BIOLOGICAL_PROCESS	3.20143e-23	1.35327e-24	80	4	3549	4724
[OVER]	GO:0006082	organic acid metabolic process	BIOLOGICAL_PROCESS	5.16252e-23	2.188e-24	73	2	3556	4726
[OVER]	GO:0032259	methylation	BIOLOGICAL_PROCESS	5.29203e-23	2.24879e-24	85	6	3544	4722
[OVER]	GO:0001882	nucleoside binding	MOLECULAR_FUNCTION	8.53287e-23	3.6545e-24	87	7	3542	4721
[OVER]	GO:0019001	guanyl nucleotide binding	MOLECULAR_FUNCTION	8.53287e-23	3.6545e-24	87	7	3542	4721
[OVER]	GO:0032561	guanyl ribonucleotide binding	MOLECULAR_FUNCTION	8.53287e-23	3.6545e-24	87	7	3542	4721
[OVER]	GO:0023057	negative regulation of signaling	BIOLOGICAL_PROCESS	1.1025e-22	4.75875e-24	64	0	3565	4728
[OVER]	GO:0010648	negative regulation of cell communication	BIOLOGICAL_PROCESS	1.1025e-22	4.75875e-24	64	0	3565	4728
[OVER]	GO:0034660	ncRNA metabolic process	BIOLOGICAL_PROCESS	1.1025e-22	4.75875e-24	64	0	3565	4728
[OVER]	GO:0043436	oxoacid metabolic process	BIOLOGICAL_PROCESS	1.14631e-22	4.96061e-24	72	2	3557	4726
[OVER]	GO:0031226	intrinsic component of plasma membrane	CELLULAR_COMPONENT	1.46842e-22	6.3709e-24	75	3	3554	4725
[OVER]	GO:0001883	purine nucleoside binding	MOLECULAR_FUNCTION	1.81041e-22	7.89507e-24	86	7	3543	4721
[OVER]	GO:0032549	ribonucleoside binding	MOLECULAR_FUNCTION	1.81041e-22	7.89507e-24	86	7	3543	4721
[OVER]	GO:0072359	circulatory system development	BIOLOGICAL_PROCESS	2.52512e-22	1.10682e-23	63	0	3566	4728
[OVER]	GO:0022603	regulation of anatomical structure morphogenesis	BIOLOGICAL_PROCESS	2.52512e-22	1.10682e-23	63	0	3566	4728
[OVER]	GO:0098805	whole membrane	CELLULAR_COMPONENT	2.55152e-22	1.12408e-23	71	2	3558	4726
[OVER]	GO:0022890	inorganic cation transmembrane transporter activity	MOLECULAR_FUNCTION	2.55152e-22	1.12408e-23	71	2	3558	4726
[OVER]	GO:0050877	nervous system process	BIOLOGICAL_PROCESS	3.00292e-22	1.3263e-23	80	5	3549	4723
[OVER]	GO:1901700	response to oxygen-containing compound	BIOLOGICAL_PROCESS	3.22362e-22	1.42737e-23	74	3	3555	4725
[OVER]	GO:0016567	protein ubiquitination	BIOLOGICAL_PROCESS	3.33148e-22	1.47884e-23	77	4	3552	4724
[OVER]	GO:0005525	GTP binding	MOLECULAR_FUNCTION	3.80979e-22	1.70391e-23	85	7	3544	4721
[OVER]	GO:0051020	GTPase binding	MOLECULAR_FUNCTION	3.80979e-22	1.70391e-23	85	7	3544	4721
[OVER]	GO:0032550	purine ribonucleoside binding	MOLECULAR_FUNCTION	3.80979e-22	1.70391e-23	85	7	3544	4721
[OVER]	GO:0005198	structural molecule activity	MOLECULAR_FUNCTION	5.58014e-22	2.50192e-23	87	8	3542	4720
[OVER]	GO:0019752	carboxylic acid metabolic process	BIOLOGICAL_PROCESS	5.66397e-22	2.54582e-23	70	2	3559	4726
[OVER]	GO:0001067	regulatory region nucleic acid binding	MOLECULAR_FUNCTION	5.68409e-22	2.57388e-23	62	0	3567	4728
[OVER]	GO:0051338	regulation of transferase activity	BIOLOGICAL_PROCESS	5.68409e-22	2.57388e-23	62	0	3567	4728
[OVER]	GO:0044212	transcription regulatory region DNA binding	MOLECULAR_FUNCTION	5.68409e-22	2.57388e-23	62	0	3567	4728
[OVER]	GO:0003700	DNA-binding transcription factor activity	MOLECULAR_FUNCTION	5.71287e-22	2.59329e-23	94	11	3535	4717
[OVER]	GO:0005887	integral component of plasma membrane	CELLULAR_COMPONENT	7.00575e-22	3.1958e-23	73	3	3556	4725
[OVER]	GO:0051345	positive regulation of hydrolase activity	BIOLOGICAL_PROCESS	7.00575e-22	3.1958e-23	73	3	3556	4725
[OVER]	GO:0098655	cation transmembrane transport	BIOLOGICAL_PROCESS	7.1655e-22	3.27666e-23	76	4	3553	4724
[OVER]	GO:0016741	transferase activity, transferring one-carbon groups	MOLECULAR_FUNCTION	1.10109e-21	5.04737e-23	81	6	3548	4722
[OVER]	GO:0097435	supramolecular fiber organization	BIOLOGICAL_PROCESS	1.25408e-21	5.76265e-23	69	2	3560	4726
[OVER]	GO:0051241	negative regulation of multicellular organismal process	BIOLOGICAL_PROCESS	1.29608e-21	5.98456e-23	61	0	3568	4728
[OVER]	GO:0051093	negative regulation of developmental process	BIOLOGICAL_PROCESS	1.29608e-21	5.98456e-23	61	0	3568	4728
[OVER]	GO:0005813	centrosome	CELLULAR_COMPONENT	1.67819e-21	7.78636e-23	65	1	3564	4727
[OVER]	GO:0048646	anatomical structure formation involved in morphogenesis	BIOLOGICAL_PROCESS	1.67819e-21	7.78636e-23	65	1	3564	4727
[OVER]	GO:0008047	enzyme activator activity	MOLECULAR_FUNCTION	2.8031e-21	1.3037e-22	68	2	3561	4726
[OVER]	GO:0032880	regulation of protein localization	BIOLOGICAL_PROCESS	2.97709e-21	1.39126e-22	60	0	3569	4728
[OVER]	GO:0009968	negative regulation of signal transduction	BIOLOGICAL_PROCESS	2.97709e-21	1.39126e-22	60	0	3569	4728
[OVER]	GO:0046903	secretion	BIOLOGICAL_PROCESS	2.98492e-21	1.39825e-22	77	5	3552	4723
[OVER]	GO:1901137	carbohydrate derivative biosynthetic process	BIOLOGICAL_PROCESS	3.40478e-21	1.59872e-22	71	3	3558	4725
[OVER]	GO:2000145	regulation of cell motility	BIOLOGICAL_PROCESS	3.76349e-21	1.78394e-22	64	1	3565	4727
[OVER]	GO:0019941	modification-dependent protein catabolic process	BIOLOGICAL_PROCESS	3.76349e-21	1.78394e-22	64	1	3565	4727
[OVER]	GO:0043632	modification-dependent macromolecule catabolic process	BIOLOGICAL_PROCESS	3.76349e-21	1.78394e-22	64	1	3565	4727
[OVER]	GO:0040012	regulation of locomotion	BIOLOGICAL_PROCESS	3.76349e-21	1.78394e-22	64	1	3565	4727
[OVER]	GO:0008168	methyltransferase activity	MOLECULAR_FUNCTION	5.00354e-21	2.37733e-22	79	6	3550	4722
[OVER]	GO:0006259	DNA metabolic process	BIOLOGICAL_PROCESS	5.21962e-21	2.48581e-22	159	50	3470	4678
[OVER]	GO:1903047	mitotic cell cycle process	BIOLOGICAL_PROCESS	6.41101e-21	3.06035e-22	76	5	3553	4723
[OVER]	GO:0007264	small GTPase mediated signal transduction	BIOLOGICAL_PROCESS	7.41308e-21	3.54697e-22	73	4	3556	4724
[OVER]	GO:0045202	synapse	CELLULAR_COMPONENT	7.62756e-21	3.6581e-22	81	7	3548	4721
[OVER]	GO:0000398	mRNA splicing, via spliceosome	BIOLOGICAL_PROCESS	8.44045e-21	4.08561e-22	63	1	3566	4727
[OVER]	GO:0006511	ubiquitin-dependent protein catabolic process	BIOLOGICAL_PROCESS	8.44045e-21	4.08561e-22	63	1	3566	4727
[OVER]	GO:0000377	RNA splicing, via transesterification reactions with bulged adenosine as nucleophile	BIOLOGICAL_PROCESS	8.44045e-21	4.08561e-22	63	1	3566	4727
[OVER]	GO:0000375	RNA splicing, via transesterification reactions	BIOLOGICAL_PROCESS	8.44045e-21	4.08561e-22	63	1	3566	4727
[OVER]	GO:0140352	export from cell	BIOLOGICAL_PROCESS	1.3793e-20	6.69189e-22	75	5	3554	4723
[OVER]	GO:0035239	tube morphogenesis	BIOLOGICAL_PROCESS	1.54547e-20	7.51533e-22	58	0	3571	4728
[OVER]	GO:0000228	nuclear chromosome	CELLULAR_COMPONENT	1.91901e-20	9.3532e-22	62	1	3567	4727
[OVER]	GO:0044092	negative regulation of molecular function	BIOLOGICAL_PROCESS	2.99248e-20	1.46186e-21	74	5	3555	4723
[OVER]	GO:0005623	cell	CELLULAR_COMPONENT	3.53005e-20	1.72841e-21	71	4	3558	4724
[OVER]	GO:1902533	positive regulation of intracellular signal transduction	BIOLOGICAL_PROCESS	3.53435e-20	1.74628e-21	57	0	3572	4728
[OVER]	GO:0009887	animal organ morphogenesis	BIOLOGICAL_PROCESS	3.53435e-20	1.74628e-21	57	0	3572	4728
[OVER]	GO:0010562	positive regulation of phosphorus metabolic process	BIOLOGICAL_PROCESS	3.53435e-20	1.74628e-21	57	0	3572	4728
[OVER]	GO:0045937	positive regulation of phosphate metabolic process	BIOLOGICAL_PROCESS	3.53435e-20	1.74628e-21	57	0	3572	4728
[OVER]	GO:0000226	microtubule cytoskeleton organization	BIOLOGICAL_PROCESS	3.59289e-20	1.77921e-21	68	3	3561	4725
[OVER]	GO:0030001	metal ion transport	BIOLOGICAL_PROCESS	7.99164e-20	3.96641e-21	67	3	3562	4725
[OVER]	GO:0000122	negative regulation of transcription by RNA polymerase II	BIOLOGICAL_PROCESS	8.15598e-20	4.05707e-21	56	0	3573	4728
[OVER]	GO:0060429	epithelium development	BIOLOGICAL_PROCESS	9.7984e-20	4.89592e-21	60	1	3569	4727
[OVER]	GO:0045182	translation regulator activity	MOLECULAR_FUNCTION	9.7984e-20	4.89592e-21	60	1	3569	4727
[OVER]	GO:0004930	G protein-coupled receptor activity	MOLECULAR_FUNCTION	9.93011e-20	4.97281e-21	89	12	3540	4716
[OVER]	GO:0032940	secretion by cell	BIOLOGICAL_PROCESS	1.38278e-19	6.95552e-21	72	5	3557	4723
[OVER]	GO:0098660	inorganic ion transmembrane transport	BIOLOGICAL_PROCESS	1.38278e-19	6.95552e-21	72	5	3557	4723
[OVER]	GO:0022613	ribonucleoprotein complex biogenesis	BIOLOGICAL_PROCESS	1.51922e-19	7.65881e-21	63	2	3566	4726
[OVER]	GO:0000904	cell morphogenesis involved in differentiation	BIOLOGICAL_PROCESS	2.21076e-19	1.11943e-20	59	1	3570	4727
[OVER]	GO:0007417	central nervous system development	BIOLOGICAL_PROCESS	2.21076e-19	1.11943e-20	59	1	3570	4727
[OVER]	GO:0042327	positive regulation of phosphorylation	BIOLOGICAL_PROCESS	4.30361e-19	2.18877e-20	54	0	3575	4728
[OVER]	GO:0002682	regulation of immune system process	BIOLOGICAL_PROCESS	4.30361e-19	2.18877e-20	54	0	3575	4728
[OVER]	GO:0030334	regulation of cell migration	BIOLOGICAL_PROCESS	4.99761e-19	2.55845e-20	58	1	3571	4727
[OVER]	GO:0060341	regulation of cellular localization	BIOLOGICAL_PROCESS	4.99761e-19	2.55845e-20	58	1	3571	4727
[OVER]	GO:0042493	response to drug	BIOLOGICAL_PROCESS	4.99761e-19	2.55845e-20	58	1	3571	4727
[OVER]	GO:0007167	enzyme linked receptor protein signaling pathway	BIOLOGICAL_PROCESS	7.91384e-19	4.06019e-20	67	4	3562	4724
[OVER]	GO:0005840	ribosome	CELLULAR_COMPONENT	8.48808e-19	4.37374e-20	64	3	3565	4725
[OVER]	GO:0010564	regulation of cell cycle process	BIOLOGICAL_PROCESS	8.48808e-19	4.37374e-20	64	3	3565	4725
[OVER]	GO:0090079	translation regulator activity, nucleic acid binding	MOLECULAR_FUNCTION	1.12939e-18	5.84471e-20	57	1	3572	4727
[OVER]	GO:0008135	translation factor activity, RNA binding	MOLECULAR_FUNCTION	1.12939e-18	5.84471e-20	57	1	3572	4727
[OVER]	GO:0140098	catalytic activity, acting on RNA	MOLECULAR_FUNCTION	1.38111e-18	7.16281e-20	69	5	3560	4723
[OVER]	GO:0098797	plasma membrane protein complex	CELLULAR_COMPONENT	1.68113e-18	8.75627e-20	60	2	3569	4726
[OVER]	GO:0090407	organophosphate biosynthetic process	BIOLOGICAL_PROCESS	1.68113e-18	8.75627e-20	60	2	3569	4726
[OVER]	GO:0043549	regulation of kinase activity	BIOLOGICAL_PROCESS	2.25598e-18	1.18008e-19	52	0	3577	4728
[OVER]	GO:0072358	cardiovascular system development	BIOLOGICAL_PROCESS	2.25598e-18	1.18008e-19	52	0	3577	4728
[OVER]	GO:0098590	plasma membrane region	CELLULAR_COMPONENT	2.54598e-18	1.33461e-19	56	1	3573	4727
[OVER]	GO:0008289	lipid binding	MOLECULAR_FUNCTION	3.72467e-18	1.95663e-19	65	4	3564	4724
[OVER]	GO:0030031	cell projection assembly	BIOLOGICAL_PROCESS	3.73421e-18	1.96998e-19	59	2	3570	4726
[OVER]	GO:0120031	plasma membrane bounded cell projection assembly	BIOLOGICAL_PROCESS	3.73421e-18	1.96998e-19	59	2	3570	4726
[OVER]	GO:0015267	channel activity	MOLECULAR_FUNCTION	4.07319e-18	2.15789e-19	62	3	3567	4725
[OVER]	GO:0022803	passive transmembrane transporter activity	MOLECULAR_FUNCTION	4.07319e-18	2.15789e-19	62	3	3567	4725
[OVER]	GO:1990837	sequence-specific double-stranded DNA binding	MOLECULAR_FUNCTION	5.11704e-18	2.73944e-19	51	0	3578	4728
[OVER]	GO:0001568	blood vessel development	BIOLOGICAL_PROCESS	5.11704e-18	2.73944e-19	51	0	3578	4728
[OVER]	GO:0001944	vasculature development	BIOLOGICAL_PROCESS	5.11704e-18	2.73944e-19	51	0	3578	4728
[OVER]	GO:0001934	positive regulation of protein phosphorylation	BIOLOGICAL_PROCESS	5.11704e-18	2.73944e-19	51	0	3578	4728
[OVER]	GO:0045859	regulation of protein kinase activity	BIOLOGICAL_PROCESS	5.11704e-18	2.73944e-19	51	0	3578	4728
[OVER]	GO:0006952	defense response	BIOLOGICAL_PROCESS	5.66628e-18	3.04611e-19	55	1	3574	4727
[OVER]	GO:0004386	helicase activity	MOLECULAR_FUNCTION	5.66628e-18	3.04611e-19	55	1	3574	4727
[OVER]	GO:0098662	inorganic cation transmembrane transport	BIOLOGICAL_PROCESS	7.96133e-18	4.28878e-19	64	4	3565	4724
[OVER]	GO:0016569	covalent chromatin modification	BIOLOGICAL_PROCESS	8.20458e-18	4.42897e-19	58	2	3571	4726
[OVER]	GO:0005216	ion channel activity	MOLECULAR_FUNCTION	8.84934e-18	4.7869e-19	61	3	3568	4725
[OVER]	GO:0008610	lipid biosynthetic process	BIOLOGICAL_PROCESS	1.17302e-17	6.35834e-19	50	0	3579	4728
[OVER]	GO:0004175	endopeptidase activity	MOLECULAR_FUNCTION	1.32613e-17	7.20302e-19	71	7	3558	4721
[OVER]	GO:0003924	GTPase activity	MOLECULAR_FUNCTION	1.34185e-17	7.30341e-19	66	5	3563	4723
[OVER]	GO:0016570	histone modification	BIOLOGICAL_PROCESS	1.82443e-17	9.95031e-19	57	2	3572	4726
[OVER]	GO:0010638	positive regulation of organelle organization	BIOLOGICAL_PROCESS	2.689e-17	1.47556e-18	49	0	3580	4728
[OVER]	GO:0009790	embryo development	BIOLOGICAL_PROCESS	2.689e-17	1.47556e-18	49	0	3580	4728
[OVER]	GO:0045597	positive regulation of cell differentiation	BIOLOGICAL_PROCESS	2.689e-17	1.47556e-18	49	0	3580	4728
[OVER]	GO:0060284	regulation of cell development	BIOLOGICAL_PROCESS	2.86438e-17	1.58458e-18	53	1	3576	4727
[OVER]	GO:0098609	cell-cell adhesion	BIOLOGICAL_PROCESS	2.86438e-17	1.58001e-18	65	5	3564	4723
[OVER]	GO:0042578	phosphoric ester hydrolase activity	MOLECULAR_FUNCTION	2.86438e-17	1.58001e-18	65	5	3564	4723
[OVER]	GO:0000785	chromatin	CELLULAR_COMPONENT	2.86438e-17	1.58458e-18	53	1	3576	4727
[OVER]	GO:0044419	interspecies interaction between organisms	BIOLOGICAL_PROCESS	3.69814e-17	2.05406e-18	62	4	3567	4724
[OVER]	GO:0099513	polymeric cytoskeletal fiber	CELLULAR_COMPONENT	3.69814e-17	2.05406e-18	62	4	3567	4724
[OVER]	GO:0003779	actin binding	MOLECULAR_FUNCTION	4.25139e-17	2.3661e-18	67	6	3562	4722
[OVER]	GO:0000976	transcription regulatory region sequence-specific DNA binding	MOLECULAR_FUNCTION	6.12721e-17	3.42375e-18	48	0	3581	4728
[OVER]	GO:0034470	ncRNA processing	BIOLOGICAL_PROCESS	6.12721e-17	3.42375e-18	48	0	3581	4728
[OVER]	GO:0015631	tubulin binding	MOLECULAR_FUNCTION	8.93258e-17	5.01125e-18	55	2	3574	4726
[OVER]	GO:1901701	cellular response to oxygen-containing compound	BIOLOGICAL_PROCESS	8.93258e-17	5.01125e-18	55	2	3574	4726
[OVER]	GO:0055086	nucleobase-containing small molecule metabolic process	BIOLOGICAL_PROCESS	9.24522e-17	5.19696e-18	58	3	3571	4725
[OVER]	GO:0006413	translational initiation	BIOLOGICAL_PROCESS	1.40188e-16	7.94287e-18	47	0	3582	4728
[OVER]	GO:0003682	chromatin binding	MOLECULAR_FUNCTION	1.40188e-16	7.94287e-18	47	0	3582	4728
[OVER]	GO:0080135	regulation of cellular response to stress	BIOLOGICAL_PROCESS	1.40188e-16	7.94287e-18	47	0	3582	4728
[OVER]	GO:0044283	small molecule biosynthetic process	BIOLOGICAL_PROCESS	1.40188e-16	7.94287e-18	47	0	3582	4728
[OVER]	GO:0070161	anchoring junction	CELLULAR_COMPONENT	1.44628e-16	8.22669e-18	51	1	3578	4727
[OVER]	GO:0061024	membrane organization	BIOLOGICAL_PROCESS	1.44628e-16	8.22669e-18	51	1	3578	4727
[OVER]	GO:0005615	extracellular space	CELLULAR_COMPONENT	1.71856e-16	9.79462e-18	60	4	3569	4724
[OVER]	GO:0007018	microtubule-based movement	BIOLOGICAL_PROCESS	1.9633e-16	1.12332e-17	54	2	3575	4726
[OVER]	GO:0009894	regulation of catabolic process	BIOLOGICAL_PROCESS	1.9633e-16	1.12332e-17	54	2	3575	4726
[OVER]	GO:0048471	perinuclear region of cytoplasm	CELLULAR_COMPONENT	3.19515e-16	1.8424e-17	46	0	3583	4728
[OVER]	GO:0098687	chromosomal region	CELLULAR_COMPONENT	3.19515e-16	1.8424e-17	46	0	3583	4728
[OVER]	GO:0009314	response to radiation	BIOLOGICAL_PROCESS	3.19515e-16	1.8424e-17	46	0	3583	4728
[OVER]	GO:0009607	response to biotic stimulus	BIOLOGICAL_PROCESS	3.19515e-16	1.8424e-17	46	0	3583	4728
[OVER]	GO:0030162	regulation of proteolysis	BIOLOGICAL_PROCESS	3.6957e-16	2.13515e-17	59	4	3570	4724
[OVER]	GO:0060589	nucleoside-triphosphatase regulator activity	MOLECULAR_FUNCTION	4.33826e-16	2.51605e-17	53	2	3576	4726
[OVER]	GO:0046873	metal ion transmembrane transporter activity	MOLECULAR_FUNCTION	4.33826e-16	2.51605e-17	53	2	3576	4726
[OVER]	GO:0050662	coenzyme binding	MOLECULAR_FUNCTION	4.35563e-16	2.53585e-17	56	3	3573	4725
[OVER]	GO:0016311	dephosphorylation	BIOLOGICAL_PROCESS	4.35563e-16	2.53585e-17	56	3	3573	4725
[OVER]	GO:0001775	cell activation	BIOLOGICAL_PROCESS	7.25581e-16	4.27289e-17	45	0	3584	4728
[OVER]	GO:0060322	head development	BIOLOGICAL_PROCESS	7.25581e-16	4.27289e-17	45	0	3584	4728
[OVER]	GO:0008134	transcription factor binding	MOLECULAR_FUNCTION	7.25581e-16	4.27289e-17	45	0	3584	4728
[OVER]	GO:0043207	response to external biotic stimulus	BIOLOGICAL_PROCESS	7.25581e-16	4.27289e-17	45	0	3584	4728
[OVER]	GO:0051707	response to other organism	BIOLOGICAL_PROCESS	7.25581e-16	4.27289e-17	45	0	3584	4728
[OVER]	GO:0043005	neuron projection	CELLULAR_COMPONENT	7.25581e-16	4.26222e-17	49	1	3580	4727
[OVER]	GO:0000003	reproduction	BIOLOGICAL_PROCESS	8.2849e-16	4.88815e-17	63	6	3566	4722
[OVER]	GO:0032989	cellular component morphogenesis	BIOLOGICAL_PROCESS	9.47226e-16	5.63095e-17	52	2	3577	4726
[OVER]	GO:1901698	response to nitrogen compound	BIOLOGICAL_PROCESS	9.47226e-16	5.63095e-17	52	2	3577	4726
[OVER]	GO:0034330	cell junction organization	BIOLOGICAL_PROCESS	9.47226e-16	5.63095e-17	52	2	3577	4726
[OVER]	GO:0006955	immune response	BIOLOGICAL_PROCESS	9.47226e-16	5.63095e-17	52	2	3577	4726
[OVER]	GO:0006820	anion transport	BIOLOGICAL_PROCESS	1.07441e-15	6.39899e-17	65	7	3564	4721
[OVER]	GO:0032990	cell part morphogenesis	BIOLOGICAL_PROCESS	1.6185e-15	9.69367e-17	48	1	3581	4727
[OVER]	GO:0031329	regulation of cellular catabolic process	BIOLOGICAL_PROCESS	1.6185e-15	9.69367e-17	48	1	3581	4727
[OVER]	GO:0014070	response to organic cyclic compound	BIOLOGICAL_PROCESS	1.6185e-15	9.69367e-17	48	1	3581	4727
[OVER]	GO:0023014	signal transduction by protein phosphorylation	BIOLOGICAL_PROCESS	1.64511e-15	9.90809e-17	44	0	3585	4728
[OVER]	GO:0000977	RNA polymerase II regulatory region sequence-specific DNA binding	MOLECULAR_FUNCTION	1.64511e-15	9.90809e-17	44	0	3585	4728
[OVER]	GO:0001012	RNA polymerase II regulatory region DNA binding	MOLECULAR_FUNCTION	1.64511e-15	9.90809e-17	44	0	3585	4728
[OVER]	GO:0016853	isomerase activity	MOLECULAR_FUNCTION	1.6755e-15	1.01098e-16	57	4	3572	4724
[OVER]	GO:0022414	reproductive process	BIOLOGICAL_PROCESS	1.71772e-15	1.03837e-16	62	6	3567	4722
[OVER]	GO:0120039	plasma membrane bounded cell projection morphogenesis	BIOLOGICAL_PROCESS	3.61167e-15	2.20341e-16	47	1	3582	4727
[OVER]	GO:0048812	neuron projection morphogenesis	BIOLOGICAL_PROCESS	3.61167e-15	2.20341e-16	47	1	3582	4727
[OVER]	GO:0048858	cell projection morphogenesis	BIOLOGICAL_PROCESS	3.61167e-15	2.20341e-16	47	1	3582	4727
[OVER]	GO:0003712	transcription coregulator activity	MOLECULAR_FUNCTION	3.61167e-15	2.20341e-16	47	1	3582	4727
[OVER]	GO:0002520	immune system development	BIOLOGICAL_PROCESS	3.61167e-15	2.20341e-16	47	1	3582	4727
[OVER]	GO:0000165	MAPK cascade	BIOLOGICAL_PROCESS	3.7516e-15	2.29715e-16	43	0	3586	4728
[OVER]	GO:0045596	negative regulation of cell differentiation	BIOLOGICAL_PROCESS	3.7516e-15	2.29715e-16	43	0	3586	4728
[OVER]	GO:0006753	nucleoside phosphate metabolic process	BIOLOGICAL_PROCESS	4.57774e-15	2.81322e-16	50	2	3579	4726
[OVER]	GO:0009117	nucleotide metabolic process	BIOLOGICAL_PROCESS	4.57774e-15	2.81322e-16	50	2	3579	4726
[OVER]	GO:0005975	carbohydrate metabolic process	BIOLOGICAL_PROCESS	7.56217e-15	4.66415e-16	60	6	3569	4722
[OVER]	GO:0043087	regulation of GTPase activity	BIOLOGICAL_PROCESS	7.56217e-15	4.66415e-16	60	6	3569	4722
[OVER]	GO:0034097	response to cytokine	BIOLOGICAL_PROCESS	8.10105e-15	5.00556e-16	46	1	3583	4727
[OVER]	GO:0048514	blood vessel morphogenesis	BIOLOGICAL_PROCESS	8.55628e-15	5.32501e-16	42	0	3587	4728
[OVER]	GO:0044089	positive regulation of cellular component biogenesis	BIOLOGICAL_PROCESS	8.55628e-15	5.32501e-16	42	0	3587	4728
[OVER]	GO:0003743	translation initiation factor activity	MOLECULAR_FUNCTION	8.55628e-15	5.32501e-16	42	0	3587	4728
[OVER]	GO:0007423	sensory organ development	BIOLOGICAL_PROCESS	8.55628e-15	5.32501e-16	42	0	3587	4728
[OVER]	GO:0016757	transferase activity, transferring glycosyl groups	MOLECULAR_FUNCTION	9.47269e-15	5.9059e-16	62	7	3567	4721
[OVER]	GO:0019787	ubiquitin-like protein transferase activity	MOLECULAR_FUNCTION	9.52898e-15	5.96226e-16	52	3	3577	4725
[OVER]	GO:0051129	negative regulation of cellular component organization	BIOLOGICAL_PROCESS	9.52898e-15	5.96226e-16	52	3	3577	4725
[OVER]	GO:0008017	microtubule binding	MOLECULAR_FUNCTION	1.00185e-14	6.27972e-16	49	2	3580	4726
[OVER]	GO:0090305	nucleic acid phosphodiester bond hydrolysis	BIOLOGICAL_PROCESS	1.57049e-14	9.86153e-16	59	6	3570	4722
[OVER]	GO:0071345	cellular response to cytokine stimulus	BIOLOGICAL_PROCESS	1.80025e-14	1.13645e-15	45	1	3584	4727
[OVER]	GO:0005543	phospholipid binding	MOLECULAR_FUNCTION	1.80025e-14	1.13645e-15	45	1	3584	4727
[OVER]	GO:0007015	actin filament organization	BIOLOGICAL_PROCESS	1.80025e-14	1.13645e-15	45	1	3584	4727
[OVER]	GO:0019904	protein domain specific binding	MOLECULAR_FUNCTION	1.93457e-14	1.23419e-15	41	0	3588	4728
[OVER]	GO:0043414	macromolecule methylation	BIOLOGICAL_PROCESS	1.93457e-14	1.23419e-15	41	0	3588	4728
[OVER]	GO:0031400	negative regulation of protein modification process	BIOLOGICAL_PROCESS	1.93457e-14	1.23419e-15	41	0	3588	4728
[OVER]	GO:0005667	transcription factor complex	CELLULAR_COMPONENT	1.93457e-14	1.23419e-15	41	0	3588	4728
[OVER]	GO:0010498	proteasomal protein catabolic process	BIOLOGICAL_PROCESS	1.93457e-14	1.23419e-15	41	0	3588	4728
[OVER]	GO:0046486	glycerolipid metabolic process	BIOLOGICAL_PROCESS	1.93457e-14	1.23419e-15	41	0	3588	4728
[OVER]	GO:0003774	motor activity	MOLECULAR_FUNCTION	2.0486e-14	1.30922e-15	51	3	3578	4725
[OVER]	GO:0048878	chemical homeostasis	BIOLOGICAL_PROCESS	2.17999e-14	1.40048e-15	48	2	3581	4726
[OVER]	GO:0009725	response to hormone	BIOLOGICAL_PROCESS	2.17999e-14	1.40048e-15	48	2	3581	4726
[OVER]	GO:0015629	actin cytoskeleton	CELLULAR_COMPONENT	2.17999e-14	1.40048e-15	48	2	3581	4726
[OVER]	GO:0048534	hematopoietic or lymphoid organ development	BIOLOGICAL_PROCESS	3.97925e-14	2.57857e-15	44	1	3585	4727
[OVER]	GO:0030097	hemopoiesis	BIOLOGICAL_PROCESS	3.97925e-14	2.57857e-15	44	1	3585	4727
[OVER]	GO:0051960	regulation of nervous system development	BIOLOGICAL_PROCESS	3.97925e-14	2.57857e-15	44	1	3585	4727
[OVER]	GO:1901361	organic cyclic compound catabolic process	BIOLOGICAL_PROCESS	3.97925e-14	2.57857e-15	44	1	3585	4727
[OVER]	GO:0015077	monovalent inorganic cation transmembrane transporter activity	MOLECULAR_FUNCTION	3.97925e-14	2.57857e-15	44	1	3585	4727
[OVER]	GO:0043547	positive regulation of GTPase activity	BIOLOGICAL_PROCESS	4.37844e-14	2.87143e-15	50	3	3579	4725
[OVER]	GO:0072521	purine-containing compound metabolic process	BIOLOGICAL_PROCESS	4.37844e-14	2.86006e-15	40	0	3589	4728
[OVER]	GO:0006913	nucleocytoplasmic transport	BIOLOGICAL_PROCESS	4.37844e-14	2.86006e-15	40	0	3589	4728
[OVER]	GO:0051169	nuclear transport	BIOLOGICAL_PROCESS	4.37844e-14	2.86006e-15	40	0	3589	4728
[OVER]	GO:0022836	gated channel activity	MOLECULAR_FUNCTION	4.37844e-14	2.87143e-15	50	3	3579	4725
[OVER]	GO:0016607	nuclear speck	CELLULAR_COMPONENT	4.37844e-14	2.86006e-15	40	0	3589	4728
[OVER]	GO:0007265	Ras protein signal transduction	BIOLOGICAL_PROCESS	4.37844e-14	2.87143e-15	50	3	3579	4725
[OVER]	GO:0010243	response to organonitrogen compound	BIOLOGICAL_PROCESS	4.72586e-14	3.12035e-15	47	2	3582	4726
[OVER]	GO:0030695	GTPase regulator activity	MOLECULAR_FUNCTION	4.72586e-14	3.12035e-15	47	2	3582	4726
[OVER]	GO:0015672	monovalent inorganic cation transport	BIOLOGICAL_PROCESS	4.72586e-14	3.12035e-15	47	2	3582	4726
[OVER]	GO:0051493	regulation of cytoskeleton organization	BIOLOGICAL_PROCESS	4.72586e-14	3.12035e-15	47	2	3582	4726
[OVER]	GO:0004518	nuclease activity	MOLECULAR_FUNCTION	4.98974e-14	3.30015e-15	55	5	3574	4723
[OVER]	GO:0042175	nuclear outer membrane-endoplasmic reticulum membrane network	CELLULAR_COMPONENT	8.81077e-14	5.84699e-15	43	1	3586	4727
[OVER]	GO:0005789	endoplasmic reticulum membrane	CELLULAR_COMPONENT	8.81077e-14	5.84699e-15	43	1	3586	4727
[OVER]	GO:0004842	ubiquitin-protein transferase activity	MOLECULAR_FUNCTION	9.46233e-14	6.28993e-15	49	3	3580	4725
[OVER]	GO:0090066	regulation of anatomical structure size	BIOLOGICAL_PROCESS	9.80452e-14	6.62674e-15	39	0	3590	4728
[OVER]	GO:0097190	apoptotic signaling pathway	BIOLOGICAL_PROCESS	9.80452e-14	6.62674e-15	39	0	3590	4728
[OVER]	GO:0019693	ribose phosphate metabolic process	BIOLOGICAL_PROCESS	9.80452e-14	6.62674e-15	39	0	3590	4728
[OVER]	GO:0005768	endosome	CELLULAR_COMPONENT	9.80452e-14	6.62674e-15	39	0	3590	4728
[OVER]	GO:0072657	protein localization to membrane	BIOLOGICAL_PROCESS	9.80452e-14	6.62674e-15	39	0	3590	4728
[OVER]	GO:0005635	nuclear envelope	CELLULAR_COMPONENT	9.80452e-14	6.62674e-15	39	0	3590	4728
[OVER]	GO:0010608	posttranscriptional regulation of gene expression	BIOLOGICAL_PROCESS	9.80452e-14	6.62674e-15	39	0	3590	4728
[OVER]	GO:0002684	positive regulation of immune system process	BIOLOGICAL_PROCESS	9.80452e-14	6.62674e-15	39	0	3590	4728
[OVER]	GO:0007420	brain development	BIOLOGICAL_PROCESS	9.80452e-14	6.62674e-15	39	0	3590	4728
[OVER]	GO:0071900	regulation of protein serine/threonine kinase activity	BIOLOGICAL_PROCESS	9.80452e-14	6.62674e-15	39	0	3590	4728
[OVER]	GO:0019725	cellular homeostasis	BIOLOGICAL_PROCESS	1.02423e-13	6.94549e-15	46	2	3583	4726
[OVER]	GO:0044782	cilium organization	BIOLOGICAL_PROCESS	1.02423e-13	6.94549e-15	46	2	3583	4726
[OVER]	GO:0043086	negative regulation of catalytic activity	BIOLOGICAL_PROCESS	1.03511e-13	7.0308e-15	54	5	3575	4723
[OVER]	GO:0000981	DNA-binding transcription factor activity, RNA polymerase II-specific	MOLECULAR_FUNCTION	1.9411e-13	1.32495e-14	42	1	3587	4727
[OVER]	GO:0048667	cell morphogenesis involved in neuron differentiation	BIOLOGICAL_PROCESS	1.9411e-13	1.32495e-14	42	1	3587	4727
[OVER]	GO:0071407	cellular response to organic cyclic compound	BIOLOGICAL_PROCESS	1.9411e-13	1.32495e-14	42	1	3587	4727
[OVER]	GO:0005581	collagen trimer	CELLULAR_COMPONENT	2.0127e-13	1.37607e-14	48	3	3581	4725
[OVER]	GO:0043408	regulation of MAPK cascade	BIOLOGICAL_PROCESS	2.18829e-13	1.53517e-14	38	0	3591	4728
[OVER]	GO:0032787	monocarboxylic acid metabolic process	BIOLOGICAL_PROCESS	2.18829e-13	1.53517e-14	38	0	3591	4728
[OVER]	GO:0030155	regulation of cell adhesion	BIOLOGICAL_PROCESS	2.18829e-13	1.53517e-14	38	0	3591	4728
[OVER]	GO:1905114	cell surface receptor signaling pathway involved in cell-cell signaling	BIOLOGICAL_PROCESS	2.18829e-13	1.53517e-14	38	0	3591	4728
[OVER]	GO:0009259	ribonucleotide metabolic process	BIOLOGICAL_PROCESS	2.18829e-13	1.53517e-14	38	0	3591	4728
[OVER]	GO:0061695	transferase complex, transferring phosphorus-containing groups	CELLULAR_COMPONENT	2.18829e-13	1.53517e-14	38	0	3591	4728
[OVER]	GO:0005681	spliceosomal complex	CELLULAR_COMPONENT	2.18829e-13	1.53517e-14	38	0	3591	4728
[OVER]	GO:0040007	growth	BIOLOGICAL_PROCESS	2.18829e-13	1.53517e-14	38	0	3591	4728
[OVER]	GO:0022618	ribonucleoprotein complex assembly	BIOLOGICAL_PROCESS	2.18829e-13	1.53517e-14	38	0	3591	4728
[OVER]	GO:0051347	positive regulation of transferase activity	BIOLOGICAL_PROCESS	2.18829e-13	1.53517e-14	38	0	3591	4728
[OVER]	GO:0051046	regulation of secretion	BIOLOGICAL_PROCESS	2.18829e-13	1.53517e-14	38	0	3591	4728
[OVER]	GO:0010563	negative regulation of phosphorus metabolic process	BIOLOGICAL_PROCESS	2.18829e-13	1.53517e-14	38	0	3591	4728
[OVER]	GO:0070201	regulation of establishment of protein localization	BIOLOGICAL_PROCESS	2.18829e-13	1.53517e-14	38	0	3591	4728
[OVER]	GO:0045936	negative regulation of phosphate metabolic process	BIOLOGICAL_PROCESS	2.18829e-13	1.53517e-14	38	0	3591	4728
[OVER]	GO:0043269	regulation of ion transport	BIOLOGICAL_PROCESS	2.18829e-13	1.53517e-14	38	0	3591	4728
[OVER]	GO:0071826	ribonucleoprotein complex subunit organization	BIOLOGICAL_PROCESS	2.18829e-13	1.53517e-14	38	0	3591	4728
[OVER]	GO:0060271	cilium assembly	BIOLOGICAL_PROCESS	2.19447e-13	1.5444e-14	45	2	3584	4726
[OVER]	GO:0005096	GTPase activator activity	MOLECULAR_FUNCTION	2.19447e-13	1.5444e-14	45	2	3584	4726
[OVER]	GO:0031344	regulation of cell projection organization	BIOLOGICAL_PROCESS	4.2364e-13	3.00035e-14	41	1	3588	4727
[OVER]	GO:0120035	regulation of plasma membrane bounded cell projection organization	BIOLOGICAL_PROCESS	4.2364e-13	3.00035e-14	41	1	3588	4727
[OVER]	GO:0018212	peptidyl-tyrosine modification	BIOLOGICAL_PROCESS	4.2364e-13	3.00035e-14	41	1	3588	4727
[OVER]	GO:0019439	aromatic compound catabolic process	BIOLOGICAL_PROCESS	4.2364e-13	3.00035e-14	41	1	3588	4727
[OVER]	GO:0007346	regulation of mitotic cell cycle	BIOLOGICAL_PROCESS	4.2384e-13	3.00649e-14	47	3	3582	4725
[OVER]	GO:0006644	phospholipid metabolic process	BIOLOGICAL_PROCESS	4.82859e-13	3.43053e-14	44	2	3585	4726
[OVER]	GO:0032970	regulation of actin filament-based process	BIOLOGICAL_PROCESS	4.97375e-13	3.55585e-14	37	0	3592	4728
[OVER]	GO:0033993	response to lipid	BIOLOGICAL_PROCESS	4.97375e-13	3.55585e-14	37	0	3592	4728
[OVER]	GO:0051050	positive regulation of transport	BIOLOGICAL_PROCESS	4.97375e-13	3.55585e-14	37	0	3592	4728
[OVER]	GO:0008284	positive regulation of cell population proliferation	BIOLOGICAL_PROCESS	4.97375e-13	3.55585e-14	37	0	3592	4728
[OVER]	GO:0048285	organelle fission	BIOLOGICAL_PROCESS	9.39903e-13	6.73007e-14	51	5	3578	4723
[OVER]	GO:0050767	regulation of neurogenesis	BIOLOGICAL_PROCESS	9.45258e-13	6.7895e-14	40	1	3589	4727
[OVER]	GO:0048193	Golgi vesicle transport	BIOLOGICAL_PROCESS	9.45258e-13	6.7895e-14	40	1	3589	4727
[OVER]	GO:0006260	DNA replication	BIOLOGICAL_PROCESS	1.0581e-12	7.6118e-14	43	2	3586	4726
[OVER]	GO:0019900	kinase binding	MOLECULAR_FUNCTION	1.13417e-12	8.23496e-14	36	0	3593	4728
[OVER]	GO:1903827	regulation of cellular protein localization	BIOLOGICAL_PROCESS	1.13417e-12	8.23496e-14	36	0	3593	4728
[OVER]	GO:0090087	regulation of peptide transport	BIOLOGICAL_PROCESS	1.13417e-12	8.23496e-14	36	0	3593	4728
[OVER]	GO:0006399	tRNA metabolic process	BIOLOGICAL_PROCESS	1.13417e-12	8.23496e-14	36	0	3593	4728
[OVER]	GO:0006163	purine nucleotide metabolic process	BIOLOGICAL_PROCESS	1.13417e-12	8.23496e-14	36	0	3593	4728
[OVER]	GO:1903311	regulation of mRNA metabolic process	BIOLOGICAL_PROCESS	1.13417e-12	8.23496e-14	36	0	3593	4728
[OVER]	GO:0007600	sensory perception	BIOLOGICAL_PROCESS	1.42204e-12	1.0341e-13	48	4	3581	4724
[OVER]	GO:0017016	Ras GTPase binding	MOLECULAR_FUNCTION	1.95939e-12	1.42922e-13	45	3	3584	4725
[OVER]	GO:0031267	small GTPase binding	MOLECULAR_FUNCTION	1.95939e-12	1.42922e-13	45	3	3584	4725
[OVER]	GO:0061564	axon development	BIOLOGICAL_PROCESS	2.08249e-12	1.53527e-13	39	1	3590	4727
[OVER]	GO:0060548	negative regulation of cell death	BIOLOGICAL_PROCESS	2.08249e-12	1.53527e-13	39	1	3590	4727
[OVER]	GO:0046700	heterocycle catabolic process	BIOLOGICAL_PROCESS	2.08249e-12	1.53527e-13	39	1	3590	4727
[OVER]	GO:0018205	peptidyl-lysine modification	BIOLOGICAL_PROCESS	2.08249e-12	1.53527e-13	39	1	3590	4727
[OVER]	GO:0044270	cellular nitrogen compound catabolic process	BIOLOGICAL_PROCESS	2.08249e-12	1.53527e-13	39	1	3590	4727
[OVER]	GO:0018108	peptidyl-tyrosine phosphorylation	BIOLOGICAL_PROCESS	2.08249e-12	1.53527e-13	39	1	3590	4727
[OVER]	GO:0031012	extracellular matrix	CELLULAR_COMPONENT	2.08249e-12	1.53527e-13	39	1	3590	4727
[OVER]	GO:0032870	cellular response to hormone stimulus	BIOLOGICAL_PROCESS	2.28143e-12	1.68702e-13	42	2	3587	4726
[OVER]	GO:0005261	cation channel activity	MOLECULAR_FUNCTION	2.28143e-12	1.68702e-13	42	2	3587	4726
[OVER]	GO:0006650	glycerophospholipid metabolic process	BIOLOGICAL_PROCESS	2.54414e-12	1.90683e-13	35	0	3594	4728
[OVER]	GO:0016055	Wnt signaling pathway	BIOLOGICAL_PROCESS	2.54414e-12	1.90683e-13	35	0	3594	4728
[OVER]	GO:0060249	anatomical structure homeostasis	BIOLOGICAL_PROCESS	2.54414e-12	1.90683e-13	35	0	3594	4728
[OVER]	GO:0001525	angiogenesis	BIOLOGICAL_PROCESS	2.54414e-12	1.90683e-13	35	0	3594	4728
[OVER]	GO:1903530	regulation of secretion by cell	BIOLOGICAL_PROCESS	2.54414e-12	1.90683e-13	35	0	3594	4728
[OVER]	GO:0051223	regulation of protein transport	BIOLOGICAL_PROCESS	2.54414e-12	1.90683e-13	35	0	3594	4728
[OVER]	GO:0005911	cell-cell junction	CELLULAR_COMPONENT	2.54414e-12	1.90683e-13	35	0	3594	4728
[OVER]	GO:0198738	cell-cell signaling by wnt	BIOLOGICAL_PROCESS	2.54414e-12	1.90683e-13	35	0	3594	4728
[OVER]	GO:0043161	proteasome-mediated ubiquitin-dependent protein catabolic process	BIOLOGICAL_PROCESS	2.54414e-12	1.90683e-13	35	0	3594	4728
[OVER]	GO:0007169	transmembrane receptor protein tyrosine kinase signaling pathway	BIOLOGICAL_PROCESS	4.14244e-12	3.10937e-13	44	3	3585	4725
[OVER]	GO:0000790	nuclear chromatin	CELLULAR_COMPONENT	4.61469e-12	3.46899e-13	38	1	3591	4727
[OVER]	GO:1901699	cellular response to nitrogen compound	BIOLOGICAL_PROCESS	4.95332e-12	3.7346e-13	41	2	3588	4726
[OVER]	GO:0016791	phosphatase activity	MOLECULAR_FUNCTION	4.95332e-12	3.7346e-13	41	2	3588	4726
[OVER]	GO:0031514	motile cilium	CELLULAR_COMPONENT	5.79522e-12	4.41461e-13	34	0	3595	4728
[OVER]	GO:0071363	cellular response to growth factor stimulus	BIOLOGICAL_PROCESS	5.79522e-12	4.41461e-13	34	0	3595	4728
[OVER]	GO:0009150	purine ribonucleotide metabolic process	BIOLOGICAL_PROCESS	5.79522e-12	4.41461e-13	34	0	3595	4728
[OVER]	GO:0071692	protein localization to extracellular region	BIOLOGICAL_PROCESS	5.79522e-12	4.41461e-13	34	0	3595	4728
[OVER]	GO:0009416	response to light stimulus	BIOLOGICAL_PROCESS	5.79522e-12	4.41461e-13	34	0	3595	4728
[OVER]	GO:0015931	nucleobase-containing compound transport	BIOLOGICAL_PROCESS	5.79522e-12	4.41461e-13	34	0	3595	4728
[OVER]	GO:0070848	response to growth factor	BIOLOGICAL_PROCESS	5.79522e-12	4.41461e-13	34	0	3595	4728
[OVER]	GO:0007229	integrin-mediated signaling pathway	BIOLOGICAL_PROCESS	8.30722e-12	6.33743e-13	48	5	3581	4723
[OVER]	GO:0006470	protein dephosphorylation	BIOLOGICAL_PROCESS	8.82789e-12	6.75433e-13	43	3	3586	4725
[OVER]	GO:0016746	transferase activity, transferring acyl groups	MOLECULAR_FUNCTION	8.82789e-12	6.75433e-13	43	3	3586	4725
[OVER]	GO:0051272	positive regulation of cellular component movement	BIOLOGICAL_PROCESS	1.02216e-11	7.83209e-13	37	1	3592	4727
[OVER]	GO:0005874	microtubule	CELLULAR_COMPONENT	1.07608e-11	8.25725e-13	40	2	3589	4726
[OVER]	GO:0016874	ligase activity	MOLECULAR_FUNCTION	1.1239e-11	8.63674e-13	52	7	3577	4721
[OVER]	GO:0019901	protein kinase binding	MOLECULAR_FUNCTION	1.3089e-11	1.02189e-12	33	0	3596	4728
[OVER]	GO:0032956	regulation of actin cytoskeleton organization	BIOLOGICAL_PROCESS	1.3089e-11	1.02189e-12	33	0	3596	4728
[OVER]	GO:0042803	protein homodimerization activity	MOLECULAR_FUNCTION	1.3089e-11	1.02189e-12	33	0	3596	4728
[OVER]	GO:0035326	cis-regulatory region binding	MOLECULAR_FUNCTION	1.3089e-11	1.02189e-12	33	0	3596	4728
[OVER]	GO:0048729	tissue morphogenesis	BIOLOGICAL_PROCESS	1.3089e-11	1.02189e-12	33	0	3596	4728
[OVER]	GO:0045321	leukocyte activation	BIOLOGICAL_PROCESS	1.3089e-11	1.02189e-12	33	0	3596	4728
[OVER]	GO:0022804	active transmembrane transporter activity	MOLECULAR_FUNCTION	1.3089e-11	1.01282e-12	45	4	3584	4724
[OVER]	GO:0032101	regulation of response to external stimulus	BIOLOGICAL_PROCESS	1.3089e-11	1.02189e-12	33	0	3596	4728
[OVER]	GO:0034762	regulation of transmembrane transport	BIOLOGICAL_PROCESS	1.3089e-11	1.02189e-12	33	0	3596	4728
[OVER]	GO:0002790	peptide secretion	BIOLOGICAL_PROCESS	1.3089e-11	1.02189e-12	33	0	3596	4728
[OVER]	GO:0003729	mRNA binding	MOLECULAR_FUNCTION	1.3089e-11	1.02189e-12	33	0	3596	4728
[OVER]	GO:0034655	nucleobase-containing compound catabolic process	BIOLOGICAL_PROCESS	2.2502e-11	1.76683e-12	36	1	3593	4727
[OVER]	GO:0016829	lyase activity	MOLECULAR_FUNCTION	2.2502e-11	1.76683e-12	36	1	3593	4727
[OVER]	GO:0043069	negative regulation of programmed cell death	BIOLOGICAL_PROCESS	2.2502e-11	1.76683e-12	36	1	3593	4727
[OVER]	GO:0043066	negative regulation of apoptotic process	BIOLOGICAL_PROCESS	2.2502e-11	1.76683e-12	36	1	3593	4727
[OVER]	GO:0006091	generation of precursor metabolites and energy	BIOLOGICAL_PROCESS	2.3189e-11	1.82336e-12	39	2	3590	4726
[OVER]	GO:0008234	cysteine-type peptidase activity	MOLECULAR_FUNCTION	2.73812e-11	2.1591e-12	44	4	3585	4724
[OVER]	GO:0051640	organelle localization	BIOLOGICAL_PROCESS	2.73812e-11	2.1591e-12	44	4	3585	4724
[OVER]	GO:0042326	negative regulation of phosphorylation	BIOLOGICAL_PROCESS	2.94111e-11	2.36509e-12	32	0	3597	4728
[OVER]	GO:0031589	cell-substrate adhesion	BIOLOGICAL_PROCESS	2.94111e-11	2.36509e-12	32	0	3597	4728
[OVER]	GO:0048598	embryonic morphogenesis	BIOLOGICAL_PROCESS	2.94111e-11	2.36509e-12	32	0	3597	4728
[OVER]	GO:0001501	skeletal system development	BIOLOGICAL_PROCESS	2.94111e-11	2.36509e-12	32	0	3597	4728
[OVER]	GO:0005759	mitochondrial matrix	CELLULAR_COMPONENT	2.94111e-11	2.36509e-12	32	0	3597	4728
[OVER]	GO:0072594	establishment of protein localization to organelle	BIOLOGICAL_PROCESS	2.94111e-11	2.36509e-12	32	0	3597	4728
[OVER]	GO:0035592	establishment of protein localization to extracellular region	BIOLOGICAL_PROCESS	2.94111e-11	2.36509e-12	32	0	3597	4728
[OVER]	GO:0009306	protein secretion	BIOLOGICAL_PROCESS	2.94111e-11	2.36509e-12	32	0	3597	4728
[OVER]	GO:0003013	circulatory system process	BIOLOGICAL_PROCESS	2.94111e-11	2.36509e-12	32	0	3597	4728
[OVER]	GO:0009611	response to wounding	BIOLOGICAL_PROCESS	2.94111e-11	2.36509e-12	32	0	3597	4728
[OVER]	GO:0045860	positive regulation of protein kinase activity	BIOLOGICAL_PROCESS	2.94111e-11	2.36509e-12	32	0	3597	4728
[OVER]	GO:0010942	positive regulation of cell death	BIOLOGICAL_PROCESS	2.94111e-11	2.36509e-12	32	0	3597	4728
[OVER]	GO:0045664	regulation of neuron differentiation	BIOLOGICAL_PROCESS	2.94111e-11	2.36509e-12	32	0	3597	4728
[OVER]	GO:0033674	positive regulation of kinase activity	BIOLOGICAL_PROCESS	2.94111e-11	2.36509e-12	32	0	3597	4728
[OVER]	GO:0044770	cell cycle phase transition	BIOLOGICAL_PROCESS	3.93885e-11	3.17182e-12	41	3	3588	4725
[OVER]	GO:0010876	lipid localization	BIOLOGICAL_PROCESS	4.0901e-11	3.29817e-12	48	6	3581	4722
[OVER]	GO:2000147	positive regulation of cell motility	BIOLOGICAL_PROCESS	4.91137e-11	3.98234e-12	35	1	3594	4727
[OVER]	GO:0003006	developmental process involved in reproduction	BIOLOGICAL_PROCESS	4.91137e-11	3.98234e-12	35	1	3594	4727
[OVER]	GO:0040017	positive regulation of locomotion	BIOLOGICAL_PROCESS	4.91137e-11	3.98234e-12	35	1	3594	4727
[OVER]	GO:0007409	axonogenesis	BIOLOGICAL_PROCESS	4.91137e-11	3.98234e-12	35	1	3594	4727
[OVER]	GO:1901293	nucleoside phosphate biosynthetic process	BIOLOGICAL_PROCESS	4.9454e-11	4.02097e-12	38	2	3591	4726
[OVER]	GO:0009165	nucleotide biosynthetic process	BIOLOGICAL_PROCESS	4.9454e-11	4.02097e-12	38	2	3591	4726
[OVER]	GO:1902532	negative regulation of intracellular signal transduction	BIOLOGICAL_PROCESS	6.62222e-11	5.47297e-12	31	0	3598	4728
[OVER]	GO:0010256	endomembrane system organization	BIOLOGICAL_PROCESS	6.62222e-11	5.47297e-12	31	0	3598	4728
[OVER]	GO:0034248	regulation of cellular amide metabolic process	BIOLOGICAL_PROCESS	6.62222e-11	5.47297e-12	31	0	3598	4728
[OVER]	GO:0071396	cellular response to lipid	BIOLOGICAL_PROCESS	6.62222e-11	5.47297e-12	31	0	3598	4728
[OVER]	GO:0000987	cis-regulatory region sequence-specific DNA binding	MOLECULAR_FUNCTION	6.62222e-11	5.47297e-12	31	0	3598	4728
[OVER]	GO:0008015	blood circulation	BIOLOGICAL_PROCESS	6.62222e-11	5.47297e-12	31	0	3598	4728
[OVER]	GO:0009451	RNA modification	BIOLOGICAL_PROCESS	6.62222e-11	5.47297e-12	31	0	3598	4728
[OVER]	GO:0022604	regulation of cell morphogenesis	BIOLOGICAL_PROCESS	6.62222e-11	5.47297e-12	31	0	3598	4728
[OVER]	GO:0008285	negative regulation of cell population proliferation	BIOLOGICAL_PROCESS	6.62222e-11	5.47297e-12	31	0	3598	4728
[OVER]	GO:0006302	double-strand break repair	BIOLOGICAL_PROCESS	6.62222e-11	5.47297e-12	31	0	3598	4728
[OVER]	GO:0043254	regulation of protein-containing complex assembly	BIOLOGICAL_PROCESS	6.62222e-11	5.47297e-12	31	0	3598	4728
[OVER]	GO:0140101	catalytic activity, acting on a tRNA	MOLECULAR_FUNCTION	6.62222e-11	5.47297e-12	31	0	3598	4728
[OVER]	GO:0005085	guanyl-nucleotide exchange factor activity	MOLECULAR_FUNCTION	8.21852e-11	6.81058e-12	47	6	3582	4722
[OVER]	GO:0008237	metallopeptidase activity	MOLECULAR_FUNCTION	8.21852e-11	6.81058e-12	47	6	3582	4722
[OVER]	GO:0008509	anion transmembrane transporter activity	MOLECULAR_FUNCTION	8.25102e-11	6.85591e-12	40	3	3589	4725
[OVER]	GO:0000139	Golgi membrane	CELLULAR_COMPONENT	8.25102e-11	6.85591e-12	40	3	3589	4725
[OVER]	GO:0071417	cellular response to organonitrogen compound	BIOLOGICAL_PROCESS	1.06426e-10	8.85494e-12	37	2	3592	4726
[OVER]	GO:0030335	positive regulation of cell migration	BIOLOGICAL_PROCESS	1.07352e-10	8.96791e-12	34	1	3595	4727
[OVER]	GO:0030855	epithelial cell differentiation	BIOLOGICAL_PROCESS	1.07352e-10	8.96791e-12	34	1	3595	4727
[OVER]	GO:0006310	DNA recombination	BIOLOGICAL_PROCESS	1.07352e-10	8.96791e-12	34	1	3595	4727
[OVER]	GO:0000280	nuclear division	BIOLOGICAL_PROCESS	1.46206e-10	1.22464e-11	44	5	3585	4723
[OVER]	GO:0006887	exocytosis	BIOLOGICAL_PROCESS	1.46206e-10	1.22464e-11	44	5	3585	4723
[OVER]	GO:0006417	regulation of translation	BIOLOGICAL_PROCESS	1.50377e-10	1.26628e-11	30	0	3599	4728
[OVER]	GO:0050684	regulation of mRNA processing	BIOLOGICAL_PROCESS	1.50377e-10	1.26628e-11	30	0	3599	4728
[OVER]	GO:1901615	organic hydroxy compound metabolic process	BIOLOGICAL_PROCESS	1.50377e-10	1.26628e-11	30	0	3599	4728
[OVER]	GO:0051098	regulation of binding	BIOLOGICAL_PROCESS	1.50377e-10	1.26628e-11	30	0	3599	4728
[OVER]	GO:0071103	DNA conformation change	BIOLOGICAL_PROCESS	1.75437e-10	1.47926e-11	39	3	3590	4725
[OVER]	GO:0045787	positive regulation of cell cycle	BIOLOGICAL_PROCESS	2.30324e-10	1.9472e-11	36	2	3593	4726
[OVER]	GO:0099536	synaptic signaling	BIOLOGICAL_PROCESS	2.30324e-10	1.9472e-11	36	2	3593	4726
[OVER]	GO:0005740	mitochondrial envelope	CELLULAR_COMPONENT	2.38338e-10	2.01761e-11	33	1	3596	4727
[OVER]	GO:0015711	organic anion transport	BIOLOGICAL_PROCESS	3.0121e-10	2.55319e-11	43	5	3586	4723
[OVER]	GO:0050865	regulation of cell activation	BIOLOGICAL_PROCESS	3.39772e-10	2.92933e-11	29	0	3600	4728
[OVER]	GO:0060090	molecular adaptor activity	MOLECULAR_FUNCTION	3.39772e-10	2.92933e-11	29	0	3600	4728
[OVER]	GO:0001667	ameboidal-type cell migration	BIOLOGICAL_PROCESS	3.39772e-10	2.92933e-11	29	0	3600	4728
[OVER]	GO:0071214	cellular response to abiotic stimulus	BIOLOGICAL_PROCESS	3.39772e-10	2.92933e-11	29	0	3600	4728
[OVER]	GO:2001020	regulation of response to DNA damage stimulus	BIOLOGICAL_PROCESS	3.39772e-10	2.92933e-11	29	0	3600	4728
[OVER]	GO:0000978	RNA polymerase II cis-regulatory region sequence-specific DNA binding	MOLECULAR_FUNCTION	3.39772e-10	2.92933e-11	29	0	3600	4728
[OVER]	GO:0001933	negative regulation of protein phosphorylation	BIOLOGICAL_PROCESS	3.39772e-10	2.92933e-11	29	0	3600	4728
[OVER]	GO:0002252	immune effector process	BIOLOGICAL_PROCESS	3.39772e-10	2.92933e-11	29	0	3600	4728
[OVER]	GO:0051186	cofactor metabolic process	BIOLOGICAL_PROCESS	3.39772e-10	2.92933e-11	29	0	3600	4728
[OVER]	GO:0034765	regulation of ion transmembrane transport	BIOLOGICAL_PROCESS	3.39772e-10	2.92933e-11	29	0	3600	4728
[OVER]	GO:0022411	cellular component disassembly	BIOLOGICAL_PROCESS	3.39772e-10	2.92933e-11	29	0	3600	4728
[OVER]	GO:0104004	cellular response to environmental stimulus	BIOLOGICAL_PROCESS	3.39772e-10	2.92933e-11	29	0	3600	4728
[OVER]	GO:0043068	positive regulation of programmed cell death	BIOLOGICAL_PROCESS	3.39772e-10	2.92933e-11	29	0	3600	4728
[OVER]	GO:0098916	anterograde trans-synaptic signaling	BIOLOGICAL_PROCESS	4.92712e-10	4.27537e-11	35	2	3594	4726
[OVER]	GO:0051301	cell division	BIOLOGICAL_PROCESS	4.92712e-10	4.27537e-11	35	2	3594	4726
[OVER]	GO:0007268	chemical synaptic transmission	BIOLOGICAL_PROCESS	4.92712e-10	4.27537e-11	35	2	3594	4726
[OVER]	GO:0003777	microtubule motor activity	MOLECULAR_FUNCTION	4.92712e-10	4.27537e-11	35	2	3594	4726
[OVER]	GO:0099537	trans-synaptic signaling	BIOLOGICAL_PROCESS	4.92712e-10	4.27537e-11	35	2	3594	4726
[OVER]	GO:0035091	phosphatidylinositol binding	MOLECULAR_FUNCTION	5.20597e-10	4.53476e-11	32	1	3597	4727
[OVER]	GO:0034329	cell junction assembly	BIOLOGICAL_PROCESS	5.20597e-10	4.53476e-11	32	1	3597	4727
[OVER]	GO:0007610	behavior	BIOLOGICAL_PROCESS	5.20597e-10	4.53476e-11	32	1	3597	4727
[OVER]	GO:0098794	postsynapse	CELLULAR_COMPONENT	7.6897e-10	6.77545e-11	28	0	3601	4728
[OVER]	GO:0006403	RNA localization	BIOLOGICAL_PROCESS	7.6897e-10	6.77545e-11	28	0	3601	4728
[OVER]	GO:0005773	vacuole	CELLULAR_COMPONENT	7.6897e-10	6.77545e-11	28	0	3601	4728
[OVER]	GO:1902903	regulation of supramolecular fiber organization	BIOLOGICAL_PROCESS	7.6897e-10	6.77545e-11	28	0	3601	4728
[OVER]	GO:0010817	regulation of hormone levels	BIOLOGICAL_PROCESS	7.6897e-10	6.77545e-11	28	0	3601	4728
[OVER]	GO:0034504	protein localization to nucleus	BIOLOGICAL_PROCESS	7.6897e-10	6.77545e-11	28	0	3601	4728
[OVER]	GO:0016705	oxidoreductase activity, acting on paired donors, with incorporation or reduction of molecular oxygen	MOLECULAR_FUNCTION	7.6897e-10	6.77545e-11	28	0	3601	4728
[OVER]	GO:0007389	pattern specification process	BIOLOGICAL_PROCESS	7.6897e-10	6.77545e-11	28	0	3601	4728
[OVER]	GO:0043065	positive regulation of apoptotic process	BIOLOGICAL_PROCESS	7.6897e-10	6.77545e-11	28	0	3601	4728
[OVER]	GO:0006401	RNA catabolic process	BIOLOGICAL_PROCESS	1.15264e-09	1.01817e-10	31	1	3598	4727
[OVER]	GO:1990351	transporter complex	CELLULAR_COMPONENT	1.15264e-09	1.01817e-10	31	1	3598	4727
[OVER]	GO:0007059	chromosome segregation	BIOLOGICAL_PROCESS	1.24552e-09	1.1016e-10	41	5	3588	4723
[OVER]	GO:0006869	lipid transport	BIOLOGICAL_PROCESS	1.36348e-09	1.20745e-10	43	6	3586	4722
[OVER]	GO:0050776	regulation of immune response	BIOLOGICAL_PROCESS	1.74086e-09	1.56689e-10	27	0	3602	4728
[OVER]	GO:0042330	taxis	BIOLOGICAL_PROCESS	1.74086e-09	1.56689e-10	27	0	3602	4728
[OVER]	GO:0017144	drug metabolic process	BIOLOGICAL_PROCESS	1.74086e-09	1.56689e-10	27	0	3602	4728
[OVER]	GO:0098542	defense response to other organism	BIOLOGICAL_PROCESS	1.74086e-09	1.56689e-10	27	0	3602	4728
[OVER]	GO:0023061	signal release	BIOLOGICAL_PROCESS	1.74086e-09	1.56689e-10	27	0	3602	4728
[OVER]	GO:0043484	regulation of RNA splicing	BIOLOGICAL_PROCESS	1.74086e-09	1.56689e-10	27	0	3602	4728
[OVER]	GO:0048880	sensory system development	BIOLOGICAL_PROCESS	1.74086e-09	1.56689e-10	27	0	3602	4728
[OVER]	GO:0046390	ribose phosphate biosynthetic process	BIOLOGICAL_PROCESS	1.74086e-09	1.56689e-10	27	0	3602	4728
[OVER]	GO:0006935	chemotaxis	BIOLOGICAL_PROCESS	1.74086e-09	1.56689e-10	27	0	3602	4728
[OVER]	GO:0040008	regulation of growth	BIOLOGICAL_PROCESS	1.74086e-09	1.56689e-10	27	0	3602	4728
[OVER]	GO:0051051	negative regulation of transport	BIOLOGICAL_PROCESS	1.74086e-09	1.56689e-10	27	0	3602	4728
[OVER]	GO:0032535	regulation of cellular component size	BIOLOGICAL_PROCESS	1.74086e-09	1.56689e-10	27	0	3602	4728
[OVER]	GO:0032386	regulation of intracellular transport	BIOLOGICAL_PROCESS	1.74086e-09	1.56689e-10	27	0	3602	4728
[OVER]	GO:0052547	regulation of peptidase activity	BIOLOGICAL_PROCESS	2.14976e-09	1.93973e-10	38	4	3591	4724
[OVER]	GO:0051346	negative regulation of hydrolase activity	BIOLOGICAL_PROCESS	2.14976e-09	1.93973e-10	38	4	3591	4724
[OVER]	GO:1902495	transmembrane transporter complex	CELLULAR_COMPONENT	2.5153e-09	2.28358e-10	30	1	3599	4727
[OVER]	GO:0061919	process utilizing autophagic mechanism	BIOLOGICAL_PROCESS	2.5153e-09	2.28358e-10	30	1	3599	4727
[OVER]	GO:0006914	autophagy	BIOLOGICAL_PROCESS	2.5153e-09	2.28358e-10	30	1	3599	4727
[OVER]	GO:0034702	ion channel complex	CELLULAR_COMPONENT	2.5153e-09	2.28358e-10	30	1	3599	4727
[OVER]	GO:0061061	muscle structure development	BIOLOGICAL_PROCESS	2.5153e-09	2.28358e-10	30	1	3599	4727
[OVER]	GO:0044772	mitotic cell cycle phase transition	BIOLOGICAL_PROCESS	3.4585e-09	3.14374e-10	35	3	3594	4725
[OVER]	GO:0150063	visual system development	BIOLOGICAL_PROCESS	3.9232e-09	3.62303e-10	26	0	3603	4728
[OVER]	GO:0006402	mRNA catabolic process	BIOLOGICAL_PROCESS	3.9232e-09	3.62303e-10	26	0	3603	4728
[OVER]	GO:0030099	myeloid cell differentiation	BIOLOGICAL_PROCESS	3.9232e-09	3.62303e-10	26	0	3603	4728
[OVER]	GO:0031503	protein-containing complex localization	BIOLOGICAL_PROCESS	3.9232e-09	3.62303e-10	26	0	3603	4728
[OVER]	GO:0001654	eye development	BIOLOGICAL_PROCESS	3.9232e-09	3.62303e-10	26	0	3603	4728
[OVER]	GO:0072522	purine-containing compound biosynthetic process	BIOLOGICAL_PROCESS	3.9232e-09	3.62303e-10	26	0	3603	4728
[OVER]	GO:0009260	ribonucleotide biosynthetic process	BIOLOGICAL_PROCESS	3.9232e-09	3.62303e-10	26	0	3603	4728
[OVER]	GO:1901342	regulation of vasculature development	BIOLOGICAL_PROCESS	3.9232e-09	3.62303e-10	26	0	3603	4728
[OVER]	GO:0031965	nuclear membrane	CELLULAR_COMPONENT	3.9232e-09	3.62303e-10	26	0	3603	4728
[OVER]	GO:0030674	protein-macromolecule adaptor activity	MOLECULAR_FUNCTION	3.9232e-09	3.62303e-10	26	0	3603	4728
[OVER]	GO:0051258	protein polymerization	BIOLOGICAL_PROCESS	3.9232e-09	3.62303e-10	26	0	3603	4728
[OVER]	GO:0051236	establishment of RNA localization	BIOLOGICAL_PROCESS	3.9232e-09	3.62303e-10	26	0	3603	4728
[OVER]	GO:0051052	regulation of DNA metabolic process	BIOLOGICAL_PROCESS	3.9232e-09	3.62303e-10	26	0	3603	4728
[OVER]	GO:0043657	host cell	CELLULAR_COMPONENT	4.82883e-09	4.48091e-10	32	2	3597	4726
[OVER]	GO:0016042	lipid catabolic process	BIOLOGICAL_PROCESS	4.82883e-09	4.48091e-10	32	2	3597	4726
[OVER]	GO:0050801	ion homeostasis	BIOLOGICAL_PROCESS	4.82883e-09	4.48091e-10	32	2	3597	4726
[OVER]	GO:0018995	host cellular component	CELLULAR_COMPONENT	4.82883e-09	4.48091e-10	32	2	3597	4726
[OVER]	GO:0005244	voltage-gated ion channel activity	MOLECULAR_FUNCTION	5.49318e-09	5.11577e-10	29	1	3600	4727
[OVER]	GO:0031966	mitochondrial membrane	CELLULAR_COMPONENT	5.49318e-09	5.11577e-10	29	1	3600	4727
[OVER]	GO:0022832	voltage-gated channel activity	MOLECULAR_FUNCTION	5.49318e-09	5.11577e-10	29	1	3600	4727
[OVER]	GO:0016049	cell growth	BIOLOGICAL_PROCESS	8.79382e-09	8.376e-10	25	0	3604	4728
[OVER]	GO:0050878	regulation of body fluid levels	BIOLOGICAL_PROCESS	8.79382e-09	8.376e-10	25	0	3604	4728
[OVER]	GO:0048568	embryonic organ development	BIOLOGICAL_PROCESS	8.79382e-09	8.376e-10	25	0	3604	4728
[OVER]	GO:0006479	protein methylation	BIOLOGICAL_PROCESS	8.79382e-09	8.376e-10	25	0	3604	4728
[OVER]	GO:0042060	wound healing	BIOLOGICAL_PROCESS	8.79382e-09	8.376e-10	25	0	3604	4728
[OVER]	GO:0019842	vitamin binding	MOLECULAR_FUNCTION	8.79382e-09	8.376e-10	25	0	3604	4728
[OVER]	GO:0048871	multicellular organismal homeostasis	BIOLOGICAL_PROCESS	8.79382e-09	8.376e-10	25	0	3604	4728
[OVER]	GO:2001233	regulation of apoptotic signaling pathway	BIOLOGICAL_PROCESS	8.79382e-09	8.376e-10	25	0	3604	4728
[OVER]	GO:0000723	telomere maintenance	BIOLOGICAL_PROCESS	8.79382e-09	8.376e-10	25	0	3604	4728
[OVER]	GO:0000775	chromosome, centromeric region	CELLULAR_COMPONENT	8.79382e-09	8.376e-10	25	0	3604	4728
[OVER]	GO:0046649	lymphocyte activation	BIOLOGICAL_PROCESS	8.79382e-09	8.376e-10	25	0	3604	4728
[OVER]	GO:0046488	phosphatidylinositol metabolic process	BIOLOGICAL_PROCESS	8.79382e-09	8.376e-10	25	0	3604	4728
[OVER]	GO:0008213	protein alkylation	BIOLOGICAL_PROCESS	8.79382e-09	8.376e-10	25	0	3604	4728
[OVER]	GO:0031252	cell leading edge	CELLULAR_COMPONENT	8.79382e-09	8.376e-10	25	0	3604	4728
[OVER]	GO:0032200	telomere organization	BIOLOGICAL_PROCESS	8.79382e-09	8.376e-10	25	0	3604	4728
[OVER]	GO:0022853	active ion transmembrane transporter activity	MOLECULAR_FUNCTION	8.79382e-09	8.376e-10	25	0	3604	4728
[OVER]	GO:0071824	protein-DNA complex subunit organization	BIOLOGICAL_PROCESS	8.79382e-09	8.376e-10	25	0	3604	4728
[OVER]	GO:0003713	transcription coactivator activity	MOLECULAR_FUNCTION	8.79382e-09	8.376e-10	25	0	3604	4728
[OVER]	GO:0002521	leukocyte differentiation	BIOLOGICAL_PROCESS	8.79382e-09	8.376e-10	25	0	3604	4728
[OVER]	GO:0043656	host intracellular region	CELLULAR_COMPONENT	1.01514e-08	9.77098e-10	31	2	3598	4726
[OVER]	GO:0042025	host cell nucleus	CELLULAR_COMPONENT	1.01514e-08	9.77098e-10	31	2	3598	4726
[OVER]	GO:0048609	multicellular organismal reproductive process	BIOLOGICAL_PROCESS	1.01514e-08	9.77098e-10	31	2	3598	4726
[OVER]	GO:0009100	glycoprotein metabolic process	BIOLOGICAL_PROCESS	1.01514e-08	9.77098e-10	31	2	3598	4726
[OVER]	GO:0032504	multicellular organism reproduction	BIOLOGICAL_PROCESS	1.01514e-08	9.77098e-10	31	2	3598	4726
[OVER]	GO:0033648	host intracellular membrane-bounded organelle	CELLULAR_COMPONENT	1.01514e-08	9.77098e-10	31	2	3598	4726
[OVER]	GO:0033643	host cell part	CELLULAR_COMPONENT	1.01514e-08	9.77098e-10	31	2	3598	4726
[OVER]	GO:0033647	host intracellular organelle	CELLULAR_COMPONENT	1.01514e-08	9.77098e-10	31	2	3598	4726
[OVER]	GO:0033646	host intracellular part	CELLULAR_COMPONENT	1.01514e-08	9.77098e-10	31	2	3598	4726
[OVER]	GO:0019783	ubiquitin-like protein-specific protease activity	MOLECULAR_FUNCTION	1.18102e-08	1.14467e-09	28	1	3601	4727
[OVER]	GO:0017171	serine hydrolase activity	MOLECULAR_FUNCTION	1.18102e-08	1.14467e-09	28	1	3601	4727
[OVER]	GO:0016825	hydrolase activity, acting on acid phosphorus-nitrogen bonds	MOLECULAR_FUNCTION	1.18102e-08	1.14467e-09	28	1	3601	4727
[OVER]	GO:0008236	serine-type peptidase activity	MOLECULAR_FUNCTION	1.18102e-08	1.14467e-09	28	1	3601	4727
[OVER]	GO:0019221	cytokine-mediated signaling pathway	BIOLOGICAL_PROCESS	1.18102e-08	1.14467e-09	28	1	3601	4727
[OVER]	GO:0070646	protein modification by small protein removal	BIOLOGICAL_PROCESS	1.18102e-08	1.14467e-09	28	1	3601	4727
[OVER]	GO:0052548	regulation of endopeptidase activity	BIOLOGICAL_PROCESS	1.46905e-08	1.43038e-09	33	3	3596	4725
[OVER]	GO:0010639	negative regulation of organelle organization	BIOLOGICAL_PROCESS	1.46905e-08	1.43038e-09	33	3	3596	4725
[OVER]	GO:1901987	regulation of cell cycle phase transition	BIOLOGICAL_PROCESS	1.46905e-08	1.43038e-09	33	3	3596	4725
[OVER]	GO:0045786	negative regulation of cell cycle	BIOLOGICAL_PROCESS	1.46905e-08	1.43038e-09	33	3	3596	4725
[OVER]	GO:0006631	fatty acid metabolic process	BIOLOGICAL_PROCESS	1.95048e-08	1.93612e-09	24	0	3605	4728
[OVER]	GO:0006732	coenzyme metabolic process	BIOLOGICAL_PROCESS	1.95048e-08	1.93612e-09	24	0	3605	4728
[OVER]	GO:0098552	side of membrane	CELLULAR_COMPONENT	1.95048e-08	1.93612e-09	24	0	3605	4728
[OVER]	GO:0097193	intrinsic apoptotic signaling pathway	BIOLOGICAL_PROCESS	1.95048e-08	1.93612e-09	24	0	3605	4728
[OVER]	GO:0050658	RNA transport	BIOLOGICAL_PROCESS	1.95048e-08	1.93612e-09	24	0	3605	4728
[OVER]	GO:0050657	nucleic acid transport	BIOLOGICAL_PROCESS	1.95048e-08	1.93612e-09	24	0	3605	4728
[OVER]	GO:0044798	nuclear transcription factor complex	CELLULAR_COMPONENT	1.95048e-08	1.93612e-09	24	0	3605	4728
[OVER]	GO:0060627	regulation of vesicle-mediated transport	BIOLOGICAL_PROCESS	1.95048e-08	1.93612e-09	24	0	3605	4728
[OVER]	GO:0010721	negative regulation of cell development	BIOLOGICAL_PROCESS	1.95048e-08	1.93612e-09	24	0	3605	4728
[OVER]	GO:0045444	fat cell differentiation	BIOLOGICAL_PROCESS	1.95048e-08	1.93612e-09	24	0	3605	4728
[OVER]	GO:0002009	morphogenesis of an epithelium	BIOLOGICAL_PROCESS	1.95048e-08	1.93612e-09	24	0	3605	4728
[OVER]	GO:0006164	purine nucleotide biosynthetic process	BIOLOGICAL_PROCESS	1.95048e-08	1.93612e-09	24	0	3605	4728
[OVER]	GO:0045765	regulation of angiogenesis	BIOLOGICAL_PROCESS	1.95048e-08	1.93612e-09	24	0	3605	4728
[OVER]	GO:0045785	positive regulation of cell adhesion	BIOLOGICAL_PROCESS	1.95048e-08	1.93612e-09	24	0	3605	4728
[OVER]	GO:0045862	positive regulation of proteolysis	BIOLOGICAL_PROCESS	1.95048e-08	1.93612e-09	24	0	3605	4728
[OVER]	GO:0046982	protein heterodimerization activity	MOLECULAR_FUNCTION	1.95048e-08	1.93612e-09	24	0	3605	4728
[OVER]	GO:0071902	positive regulation of protein serine/threonine kinase activity	BIOLOGICAL_PROCESS	1.95048e-08	1.93612e-09	24	0	3605	4728
[OVER]	GO:0004721	phosphoprotein phosphatase activity	MOLECULAR_FUNCTION	2.13743e-08	2.12647e-09	30	2	3599	4726
[OVER]	GO:0000151	ubiquitin ligase complex	CELLULAR_COMPONENT	2.13743e-08	2.12647e-09	30	2	3599	4726
[OVER]	GO:0004222	metalloendopeptidase activity	MOLECULAR_FUNCTION	2.56537e-08	2.55793e-09	27	1	3602	4727
[OVER]	GO:0051235	maintenance of location	BIOLOGICAL_PROCESS	2.56537e-08	2.55793e-09	27	1	3602	4727
[OVER]	GO:0008238	exopeptidase activity	MOLECULAR_FUNCTION	3.71247e-08	3.70585e-09	34	4	3595	4724
[OVER]	GO:0098742	cell-cell adhesion via plasma-membrane adhesion molecules	BIOLOGICAL_PROCESS	4.057e-08	4.05881e-09	36	5	3593	4723
[OVER]	GO:0140014	mitotic nuclear division	BIOLOGICAL_PROCESS	4.057e-08	4.05881e-09	36	5	3593	4723
[OVER]	GO:0006605	protein targeting	BIOLOGICAL_PROCESS	4.40877e-08	4.47467e-09	23	0	3606	4728
[OVER]	GO:0042391	regulation of membrane potential	BIOLOGICAL_PROCESS	4.40877e-08	4.47467e-09	23	0	3606	4728
[OVER]	GO:0048545	response to steroid hormone	BIOLOGICAL_PROCESS	4.40877e-08	4.47467e-09	23	0	3606	4728
[OVER]	GO:0001558	regulation of cell growth	BIOLOGICAL_PROCESS	4.40877e-08	4.47467e-09	23	0	3606	4728
[OVER]	GO:0000323	lytic vacuole	CELLULAR_COMPONENT	4.40877e-08	4.47467e-09	23	0	3606	4728
[OVER]	GO:0005764	lysosome	CELLULAR_COMPONENT	4.40877e-08	4.47467e-09	23	0	3606	4728
[OVER]	GO:0008033	tRNA processing	BIOLOGICAL_PROCESS	4.40877e-08	4.47467e-09	23	0	3606	4728
[OVER]	GO:0005506	iron ion binding	MOLECULAR_FUNCTION	4.40877e-08	4.47467e-09	23	0	3606	4728
[OVER]	GO:0005684	U2-type spliceosomal complex	CELLULAR_COMPONENT	4.40877e-08	4.47467e-09	23	0	3606	4728
[OVER]	GO:0051168	nuclear export	BIOLOGICAL_PROCESS	4.40877e-08	4.47467e-09	23	0	3606	4728
[OVER]	GO:0030900	forebrain development	BIOLOGICAL_PROCESS	4.40877e-08	4.47467e-09	23	0	3606	4728
[OVER]	GO:0048024	regulation of mRNA splicing, via spliceosome	BIOLOGICAL_PROCESS	4.40877e-08	4.47467e-09	23	0	3606	4728
[OVER]	GO:0009986	cell surface	CELLULAR_COMPONENT	4.40877e-08	4.47467e-09	23	0	3606	4728
[OVER]	GO:0030545	receptor regulator activity	MOLECULAR_FUNCTION	4.54526e-08	4.61826e-09	29	2	3600	4726
[OVER]	GO:0006643	membrane lipid metabolic process	BIOLOGICAL_PROCESS	5.5752e-08	5.70827e-09	26	1	3603	4727
[OVER]	GO:0050953	sensory perception of light stimulus	BIOLOGICAL_PROCESS	5.5752e-08	5.70827e-09	26	1	3603	4727
[OVER]	GO:0034703	cation channel complex	CELLULAR_COMPONENT	5.5752e-08	5.70827e-09	26	1	3603	4727
[OVER]	GO:0022843	voltage-gated cation channel activity	MOLECULAR_FUNCTION	5.5752e-08	5.70827e-09	26	1	3603	4727
[OVER]	GO:0051656	establishment of organelle localization	BIOLOGICAL_PROCESS	5.5752e-08	5.70827e-09	26	1	3603	4727
[OVER]	GO:0007601	visual perception	BIOLOGICAL_PROCESS	5.5752e-08	5.70827e-09	26	1	3603	4727
[OVER]	GO:0044282	small molecule catabolic process	BIOLOGICAL_PROCESS	5.5752e-08	5.70827e-09	26	1	3603	4727
[OVER]	GO:0004857	enzyme inhibitor activity	MOLECULAR_FUNCTION	7.5047e-08	7.69219e-09	33	4	3596	4724
[OVER]	GO:0004519	endonuclease activity	MOLECULAR_FUNCTION	8.05317e-08	8.27233e-09	35	5	3594	4723
[OVER]	GO:0051704	multi-organism process	BIOLOGICAL_PROCESS	8.05317e-08	8.27233e-09	35	5	3594	4723
[OVER]	GO:0090068	positive regulation of cell cycle process	BIOLOGICAL_PROCESS	9.6693e-08	1.00079e-08	28	2	3601	4726
[OVER]	GO:0006520	cellular amino acid metabolic process	BIOLOGICAL_PROCESS	9.6693e-08	1.00079e-08	28	2	3601	4726
[OVER]	GO:0015291	secondary active transmembrane transporter activity	MOLECULAR_FUNCTION	9.6693e-08	1.00079e-08	28	2	3601	4726
[OVER]	GO:0030546	signaling receptor activator activity	MOLECULAR_FUNCTION	9.6693e-08	1.00079e-08	28	2	3601	4726
[OVER]	GO:0009101	glycoprotein biosynthetic process	BIOLOGICAL_PROCESS	9.6693e-08	1.00079e-08	28	2	3601	4726
[OVER]	GO:0007276	gamete generation	BIOLOGICAL_PROCESS	9.6693e-08	1.00079e-08	28	2	3601	4726
[OVER]	GO:0003735	structural constituent of ribosome	MOLECULAR_FUNCTION	9.6693e-08	1.00079e-08	28	2	3601	4726
[OVER]	GO:0016053	organic acid biosynthetic process	BIOLOGICAL_PROCESS	9.78969e-08	1.034e-08	22	0	3607	4728
[OVER]	GO:0000428	DNA-directed RNA polymerase complex	CELLULAR_COMPONENT	9.78969e-08	1.034e-08	22	0	3607	4728
[OVER]	GO:0065004	protein-DNA complex assembly	BIOLOGICAL_PROCESS	9.78969e-08	1.034e-08	22	0	3607	4728
[OVER]	GO:0001816	cytokine production	BIOLOGICAL_PROCESS	9.78969e-08	1.034e-08	22	0	3607	4728
[OVER]	GO:0043410	positive regulation of MAPK cascade	BIOLOGICAL_PROCESS	9.78969e-08	1.034e-08	22	0	3607	4728
[OVER]	GO:0046394	carboxylic acid biosynthetic process	BIOLOGICAL_PROCESS	9.78969e-08	1.034e-08	22	0	3607	4728
[OVER]	GO:0030880	RNA polymerase complex	CELLULAR_COMPONENT	9.78969e-08	1.034e-08	22	0	3607	4728
[OVER]	GO:0003002	regionalization	BIOLOGICAL_PROCESS	9.78969e-08	1.034e-08	22	0	3607	4728
[OVER]	GO:0000725	recombinational repair	BIOLOGICAL_PROCESS	9.78969e-08	1.034e-08	22	0	3607	4728
[OVER]	GO:0000724	double-strand break repair via homologous recombination	BIOLOGICAL_PROCESS	9.78969e-08	1.034e-08	22	0	3607	4728
[OVER]	GO:0000781	chromosome, telomeric region	CELLULAR_COMPONENT	9.78969e-08	1.034e-08	22	0	3607	4728
[OVER]	GO:0009152	purine ribonucleotide biosynthetic process	BIOLOGICAL_PROCESS	9.78969e-08	1.034e-08	22	0	3607	4728
[OVER]	GO:0007051	spindle organization	BIOLOGICAL_PROCESS	9.78969e-08	1.034e-08	22	0	3607	4728
[OVER]	GO:0110053	regulation of actin filament organization	BIOLOGICAL_PROCESS	9.78969e-08	1.034e-08	22	0	3607	4728
[OVER]	GO:0002694	regulation of leukocyte activation	BIOLOGICAL_PROCESS	9.78969e-08	1.034e-08	22	0	3607	4728
[OVER]	GO:0009896	positive regulation of catabolic process	BIOLOGICAL_PROCESS	9.78969e-08	1.034e-08	22	0	3607	4728
[OVER]	GO:0008757	S-adenosylmethionine-dependent methyltransferase activity	MOLECULAR_FUNCTION	9.78969e-08	1.034e-08	22	0	3607	4728
[OVER]	GO:0006066	alcohol metabolic process	BIOLOGICAL_PROCESS	9.78969e-08	1.034e-08	22	0	3607	4728
[OVER]	GO:0055029	nuclear DNA-directed RNA polymerase complex	CELLULAR_COMPONENT	9.78969e-08	1.034e-08	22	0	3607	4728
[OVER]	GO:0098656	anion transmembrane transport	BIOLOGICAL_PROCESS	1.19547e-07	1.272e-08	25	1	3604	4727
[OVER]	GO:0016579	protein deubiquitination	BIOLOGICAL_PROCESS	1.19547e-07	1.272e-08	25	1	3604	4727
[OVER]	GO:0006813	potassium ion transport	BIOLOGICAL_PROCESS	1.19547e-07	1.272e-08	25	1	3604	4727
[OVER]	GO:0007005	mitochondrion organization	BIOLOGICAL_PROCESS	1.19547e-07	1.272e-08	25	1	3604	4727
[OVER]	GO:0016747	transferase activity, transferring acyl groups other than amino-acyl groups	MOLECULAR_FUNCTION	1.19547e-07	1.272e-08	25	1	3604	4727
[OVER]	GO:0033218	amide binding	MOLECULAR_FUNCTION	1.19547e-07	1.272e-08	25	1	3604	4727
[OVER]	GO:0031300	intrinsic component of organelle membrane	CELLULAR_COMPONENT	1.19547e-07	1.272e-08	25	1	3604	4727
[OVER]	GO:0033044	regulation of chromosome organization	BIOLOGICAL_PROCESS	1.27873e-07	1.36202e-08	30	3	3599	4725
[OVER]	GO:0045861	negative regulation of proteolysis	BIOLOGICAL_PROCESS	1.4927e-07	1.59159e-08	32	4	3597	4724
[OVER]	GO:0016798	hydrolase activity, acting on glycosyl bonds	MOLECULAR_FUNCTION	1.57414e-07	1.68018e-08	34	5	3595	4723
[OVER]	GO:0098771	inorganic ion homeostasis	BIOLOGICAL_PROCESS	2.01451e-07	2.1637e-08	27	2	3602	4726
[OVER]	GO:0042254	ribosome biogenesis	BIOLOGICAL_PROCESS	2.01451e-07	2.1637e-08	27	2	3602	4726
[OVER]	GO:0072511	divalent inorganic cation transport	BIOLOGICAL_PROCESS	2.01451e-07	2.1637e-08	27	2	3602	4726
[OVER]	GO:0048018	receptor ligand activity	MOLECULAR_FUNCTION	2.01451e-07	2.1637e-08	27	2	3602	4726
[OVER]	GO:0070838	divalent metal ion transport	BIOLOGICAL_PROCESS	2.01451e-07	2.1637e-08	27	2	3602	4726
[OVER]	GO:0055080	cation homeostasis	BIOLOGICAL_PROCESS	2.01451e-07	2.1637e-08	27	2	3602	4726
[OVER]	GO:0050730	regulation of peptidyl-tyrosine phosphorylation	BIOLOGICAL_PROCESS	2.16797e-07	2.38897e-08	21	0	3608	4728
[OVER]	GO:0050817	coagulation	BIOLOGICAL_PROCESS	2.16797e-07	2.38897e-08	21	0	3608	4728
[OVER]	GO:0072001	renal system development	BIOLOGICAL_PROCESS	2.16797e-07	2.38897e-08	21	0	3608	4728
[OVER]	GO:0050660	flavin adenine dinucleotide binding	MOLECULAR_FUNCTION	2.16797e-07	2.38897e-08	21	0	3608	4728
[OVER]	GO:0060070	canonical Wnt signaling pathway	BIOLOGICAL_PROCESS	2.16797e-07	2.38897e-08	21	0	3608	4728
[OVER]	GO:1990778	protein localization to cell periphery	BIOLOGICAL_PROCESS	2.16797e-07	2.38897e-08	21	0	3608	4728
[OVER]	GO:0030111	regulation of Wnt signaling pathway	BIOLOGICAL_PROCESS	2.16797e-07	2.38897e-08	21	0	3608	4728
[OVER]	GO:0001655	urogenital system development	BIOLOGICAL_PROCESS	2.16797e-07	2.38897e-08	21	0	3608	4728
[OVER]	GO:0071383	cellular response to steroid hormone stimulus	BIOLOGICAL_PROCESS	2.16797e-07	2.38897e-08	21	0	3608	4728
[OVER]	GO:0016571	histone methylation	BIOLOGICAL_PROCESS	2.16797e-07	2.38897e-08	21	0	3608	4728
[OVER]	GO:0006836	neurotransmitter transport	BIOLOGICAL_PROCESS	2.16797e-07	2.38897e-08	21	0	3608	4728
[OVER]	GO:0010035	response to inorganic substance	BIOLOGICAL_PROCESS	2.16797e-07	2.38897e-08	21	0	3608	4728
[OVER]	GO:0006997	nucleus organization	BIOLOGICAL_PROCESS	2.16797e-07	2.38897e-08	21	0	3608	4728
[OVER]	GO:0010720	positive regulation of cell development	BIOLOGICAL_PROCESS	2.16797e-07	2.38897e-08	21	0	3608	4728
[OVER]	GO:0044057	regulation of system process	BIOLOGICAL_PROCESS	2.16797e-07	2.38897e-08	21	0	3608	4728
[OVER]	GO:0051028	mRNA transport	BIOLOGICAL_PROCESS	2.16797e-07	2.38897e-08	21	0	3608	4728
[OVER]	GO:0090575	RNA polymerase II transcription factor complex	CELLULAR_COMPONENT	2.16797e-07	2.38897e-08	21	0	3608	4728
[OVER]	GO:0008154	actin polymerization or depolymerization	BIOLOGICAL_PROCESS	2.16797e-07	2.38897e-08	21	0	3608	4728
[OVER]	GO:0006352	DNA-templated transcription, initiation	BIOLOGICAL_PROCESS	2.16797e-07	2.38897e-08	21	0	3608	4728
[OVER]	GO:0031253	cell projection membrane	CELLULAR_COMPONENT	2.16797e-07	2.38897e-08	21	0	3608	4728
[OVER]	GO:0022900	electron transport chain	BIOLOGICAL_PROCESS	2.16797e-07	2.38897e-08	21	0	3608	4728
[OVER]	GO:0010975	regulation of neuron projection development	BIOLOGICAL_PROCESS	2.16797e-07	2.38897e-08	21	0	3608	4728
[OVER]	GO:0043010	camera-type eye development	BIOLOGICAL_PROCESS	2.16797e-07	2.38897e-08	21	0	3608	4728
[OVER]	GO:0001228	DNA-binding transcription activator activity, RNA polymerase II-specific	MOLECULAR_FUNCTION	2.16797e-07	2.38897e-08	21	0	3608	4728
[OVER]	GO:0001216	DNA-binding transcription activator activity	MOLECULAR_FUNCTION	2.16797e-07	2.38897e-08	21	0	3608	4728
[OVER]	GO:0036459	thiol-dependent ubiquitinyl hydrolase activity	MOLECULAR_FUNCTION	2.5579e-07	2.83007e-08	24	1	3605	4727
[OVER]	GO:0101005	ubiquitinyl hydrolase activity	MOLECULAR_FUNCTION	2.5579e-07	2.83007e-08	24	1	3605	4727
[OVER]	GO:0062023	collagen-containing extracellular matrix	CELLULAR_COMPONENT	2.5579e-07	2.83007e-08	24	1	3605	4727
[OVER]	GO:0043235	receptor complex	CELLULAR_COMPONENT	2.5579e-07	2.83007e-08	24	1	3605	4727
[OVER]	GO:0098813	nuclear chromosome segregation	BIOLOGICAL_PROCESS	3.06702e-07	3.4002e-08	33	5	3596	4723
[OVER]	GO:0044703	multi-organism reproductive process	BIOLOGICAL_PROCESS	3.06702e-07	3.4002e-08	33	5	3596	4723
[OVER]	GO:0006816	calcium ion transport	BIOLOGICAL_PROCESS	4.19216e-07	4.66626e-08	26	2	3603	4726
[OVER]	GO:0005938	cell cortex	CELLULAR_COMPONENT	4.19216e-07	4.66626e-08	26	2	3603	4726
[OVER]	GO:0018208	peptidyl-proline modification	BIOLOGICAL_PROCESS	4.19216e-07	4.66626e-08	26	2	3603	4726
[OVER]	GO:0018209	peptidyl-serine modification	BIOLOGICAL_PROCESS	4.19216e-07	4.66626e-08	26	2	3603	4726
[OVER]	GO:0006611	protein export from nucleus	BIOLOGICAL_PROCESS	4.82735e-07	5.51867e-08	20	0	3609	4728
[OVER]	GO:0019932	second-messenger-mediated signaling	BIOLOGICAL_PROCESS	4.82735e-07	5.51867e-08	20	0	3609	4728
[OVER]	GO:0032984	protein-containing complex disassembly	BIOLOGICAL_PROCESS	4.82735e-07	5.51867e-08	20	0	3609	4728
[OVER]	GO:0030258	lipid modification	BIOLOGICAL_PROCESS	4.82735e-07	5.51867e-08	20	0	3609	4728
[OVER]	GO:0016072	rRNA metabolic process	BIOLOGICAL_PROCESS	4.82735e-07	5.51867e-08	20	0	3609	4728
[OVER]	GO:1904951	positive regulation of establishment of protein localization	BIOLOGICAL_PROCESS	4.82735e-07	5.51867e-08	20	0	3609	4728
[OVER]	GO:0017048	Rho GTPase binding	MOLECULAR_FUNCTION	4.82735e-07	5.51867e-08	20	0	3609	4728
[OVER]	GO:0031334	positive regulation of protein-containing complex assembly	BIOLOGICAL_PROCESS	4.82735e-07	5.51867e-08	20	0	3609	4728
[OVER]	GO:0030198	extracellular matrix organization	BIOLOGICAL_PROCESS	4.82735e-07	5.51867e-08	20	0	3609	4728
[OVER]	GO:0016482	cytosolic transport	BIOLOGICAL_PROCESS	4.82735e-07	5.51867e-08	20	0	3609	4728
[OVER]	GO:0016591	RNA polymerase II, holoenzyme	CELLULAR_COMPONENT	4.82735e-07	5.51867e-08	20	0	3609	4728
[OVER]	GO:0000956	nuclear-transcribed mRNA catabolic process	BIOLOGICAL_PROCESS	4.82735e-07	5.51867e-08	20	0	3609	4728
[OVER]	GO:0098978	glutamatergic synapse	CELLULAR_COMPONENT	4.82735e-07	5.51867e-08	20	0	3609	4728
[OVER]	GO:0090150	establishment of protein localization to membrane	BIOLOGICAL_PROCESS	4.82735e-07	5.51867e-08	20	0	3609	4728
[OVER]	GO:0051188	cofactor biosynthetic process	BIOLOGICAL_PROCESS	4.82735e-07	5.51867e-08	20	0	3609	4728
[OVER]	GO:0016810	hydrolase activity, acting on carbon-nitrogen (but not peptide) bonds	MOLECULAR_FUNCTION	4.82735e-07	5.51867e-08	20	0	3609	4728
[OVER]	GO:0052689	carboxylic ester hydrolase activity	MOLECULAR_FUNCTION	4.82735e-07	5.51867e-08	20	0	3609	4728
[OVER]	GO:0009792	embryo development ending in birth or egg hatching	BIOLOGICAL_PROCESS	4.82735e-07	5.51867e-08	20	0	3609	4728
[OVER]	GO:0007160	cell-matrix adhesion	BIOLOGICAL_PROCESS	4.82735e-07	5.51867e-08	20	0	3609	4728
[OVER]	GO:0032147	activation of protein kinase activity	BIOLOGICAL_PROCESS	4.82735e-07	5.51867e-08	20	0	3609	4728
[OVER]	GO:0090596	sensory organ morphogenesis	BIOLOGICAL_PROCESS	4.82735e-07	5.51867e-08	20	0	3609	4728
[OVER]	GO:0051099	positive regulation of binding	BIOLOGICAL_PROCESS	4.82735e-07	5.51867e-08	20	0	3609	4728
[OVER]	GO:0045931	positive regulation of mitotic cell cycle	BIOLOGICAL_PROCESS	4.82735e-07	5.51867e-08	20	0	3609	4728
[OVER]	GO:0007596	blood coagulation	BIOLOGICAL_PROCESS	4.82735e-07	5.51867e-08	20	0	3609	4728
[OVER]	GO:0007599	hemostasis	BIOLOGICAL_PROCESS	4.82735e-07	5.51867e-08	20	0	3609	4728
[OVER]	GO:0002791	regulation of peptide secretion	BIOLOGICAL_PROCESS	4.82735e-07	5.51867e-08	20	0	3609	4728
[OVER]	GO:0043009	chordate embryonic development	BIOLOGICAL_PROCESS	4.82735e-07	5.51867e-08	20	0	3609	4728
[OVER]	GO:0000287	magnesium ion binding	MOLECULAR_FUNCTION	5.2705e-07	6.03115e-08	28	3	3601	4725
[OVER]	GO:0019866	organelle inner membrane	CELLULAR_COMPONENT	5.47729e-07	6.28612e-08	23	1	3606	4727
[OVER]	GO:0007178	transmembrane receptor protein serine/threonine kinase signaling pathway	BIOLOGICAL_PROCESS	5.47729e-07	6.28612e-08	23	1	3606	4727
[OVER]	GO:0071805	potassium ion transmembrane transport	BIOLOGICAL_PROCESS	5.47729e-07	6.28612e-08	23	1	3606	4727
[OVER]	GO:0061134	peptidase regulator activity	MOLECULAR_FUNCTION	5.87099e-07	6.7445e-08	30	4	3599	4724
[OVER]	GO:0019953	sexual reproduction	BIOLOGICAL_PROCESS	5.95543e-07	6.85479e-08	32	5	3597	4723
[OVER]	GO:0007156	homophilic cell adhesion via plasma membrane adhesion molecules	BIOLOGICAL_PROCESS	5.95543e-07	6.85479e-08	32	5	3597	4723
[OVER]	GO:0006897	endocytosis	BIOLOGICAL_PROCESS	9.94643e-07	1.14596e-07	35	7	3594	4721
[OVER]	GO:0050778	positive regulation of immune response	BIOLOGICAL_PROCESS	1.07511e-06	1.27464e-07	19	0	3610	4728
[OVER]	GO:0031647	regulation of protein stability	BIOLOGICAL_PROCESS	1.07511e-06	1.27464e-07	19	0	3610	4728
[OVER]	GO:0050708	regulation of protein secretion	BIOLOGICAL_PROCESS	1.07511e-06	1.27464e-07	19	0	3610	4728
[OVER]	GO:1903706	regulation of hemopoiesis	BIOLOGICAL_PROCESS	1.07511e-06	1.27464e-07	19	0	3610	4728
[OVER]	GO:0006405	RNA export from nucleus	BIOLOGICAL_PROCESS	1.07511e-06	1.27464e-07	19	0	3610	4728
[OVER]	GO:0043405	regulation of MAP kinase activity	BIOLOGICAL_PROCESS	1.07511e-06	1.27464e-07	19	0	3610	4728
[OVER]	GO:0031331	positive regulation of cellular catabolic process	BIOLOGICAL_PROCESS	1.07511e-06	1.27464e-07	19	0	3610	4728
[OVER]	GO:0017038	protein import	BIOLOGICAL_PROCESS	1.07511e-06	1.27464e-07	19	0	3610	4728
[OVER]	GO:0000209	protein polyubiquitination	BIOLOGICAL_PROCESS	1.07511e-06	1.27464e-07	19	0	3610	4728
[OVER]	GO:0043393	regulation of protein binding	BIOLOGICAL_PROCESS	1.07511e-06	1.27464e-07	19	0	3610	4728
[OVER]	GO:0050673	epithelial cell proliferation	BIOLOGICAL_PROCESS	1.07511e-06	1.27464e-07	19	0	3610	4728
[OVER]	GO:0019887	protein kinase regulator activity	MOLECULAR_FUNCTION	1.07511e-06	1.27464e-07	19	0	3610	4728
[OVER]	GO:0004527	exonuclease activity	MOLECULAR_FUNCTION	1.07511e-06	1.27464e-07	19	0	3610	4728
[OVER]	GO:0045017	glycerolipid biosynthetic process	BIOLOGICAL_PROCESS	1.07511e-06	1.27464e-07	19	0	3610	4728
[OVER]	GO:0010008	endosome membrane	CELLULAR_COMPONENT	1.07511e-06	1.27464e-07	19	0	3610	4728
[OVER]	GO:0006954	inflammatory response	BIOLOGICAL_PROCESS	1.07511e-06	1.27464e-07	19	0	3610	4728
[OVER]	GO:0003012	muscle system process	BIOLOGICAL_PROCESS	1.07511e-06	1.27464e-07	19	0	3610	4728
[OVER]	GO:0040029	regulation of gene expression, epigenetic	BIOLOGICAL_PROCESS	1.07511e-06	1.27464e-07	19	0	3610	4728
[OVER]	GO:0019207	kinase regulator activity	MOLECULAR_FUNCTION	1.07511e-06	1.27464e-07	19	0	3610	4728
[OVER]	GO:0010769	regulation of cell morphogenesis involved in differentiation	BIOLOGICAL_PROCESS	1.07511e-06	1.27464e-07	19	0	3610	4728
[OVER]	GO:0007163	establishment or maintenance of cell polarity	BIOLOGICAL_PROCESS	1.07511e-06	1.27464e-07	19	0	3610	4728
[OVER]	GO:1901990	regulation of mitotic cell cycle phase transition	BIOLOGICAL_PROCESS	1.07511e-06	1.26298e-07	27	3	3602	4725
[OVER]	GO:0071478	cellular response to radiation	BIOLOGICAL_PROCESS	1.07511e-06	1.27464e-07	19	0	3610	4728
[OVER]	GO:0035770	ribonucleoprotein granule	CELLULAR_COMPONENT	1.07511e-06	1.27464e-07	19	0	3610	4728
[OVER]	GO:0002181	cytoplasmic translation	BIOLOGICAL_PROCESS	1.07511e-06	1.27464e-07	19	0	3610	4728
[OVER]	GO:0006289	nucleotide-excision repair	BIOLOGICAL_PROCESS	1.07511e-06	1.27464e-07	19	0	3610	4728
[OVER]	GO:0051495	positive regulation of cytoskeleton organization	BIOLOGICAL_PROCESS	1.07511e-06	1.27464e-07	19	0	3610	4728
[OVER]	GO:0032271	regulation of protein polymerization	BIOLOGICAL_PROCESS	1.07511e-06	1.27464e-07	19	0	3610	4728
[OVER]	GO:0051536	iron-sulfur cluster binding	MOLECULAR_FUNCTION	1.07511e-06	1.27464e-07	19	0	3610	4728
[OVER]	GO:0051540	metal cluster binding	MOLECULAR_FUNCTION	1.07511e-06	1.27464e-07	19	0	3610	4728
[OVER]	GO:0120032	regulation of plasma membrane bounded cell projection assembly	BIOLOGICAL_PROCESS	1.17009e-06	1.39377e-07	22	1	3607	4727
[OVER]	GO:0042176	regulation of protein catabolic process	BIOLOGICAL_PROCESS	1.17009e-06	1.39377e-07	22	1	3607	4727
[OVER]	GO:0008094	DNA-dependent ATPase activity	MOLECULAR_FUNCTION	1.17009e-06	1.39377e-07	22	1	3607	4727
[OVER]	GO:0004252	serine-type endopeptidase activity	MOLECULAR_FUNCTION	1.17009e-06	1.39377e-07	22	1	3607	4727
[OVER]	GO:0060491	regulation of cell projection assembly	BIOLOGICAL_PROCESS	1.17009e-06	1.39377e-07	22	1	3607	4727
[OVER]	GO:0006457	protein folding	BIOLOGICAL_PROCESS	1.80383e-06	2.15268e-07	24	2	3605	4726
[OVER]	GO:0055082	cellular chemical homeostasis	BIOLOGICAL_PROCESS	1.80383e-06	2.15268e-07	24	2	3605	4726
[OVER]	GO:0061135	endopeptidase regulator activity	MOLECULAR_FUNCTION	2.20635e-06	2.63552e-07	26	3	3603	4725
[OVER]	GO:0010466	negative regulation of peptidase activity	BIOLOGICAL_PROCESS	2.35485e-06	2.81553e-07	28	4	3601	4724
[OVER]	GO:0097485	neuron projection guidance	BIOLOGICAL_PROCESS	2.39059e-06	2.94358e-07	18	0	3611	4728
[OVER]	GO:0006664	glycolipid metabolic process	BIOLOGICAL_PROCESS	2.39059e-06	2.94358e-07	18	0	3611	4728
[OVER]	GO:1903829	positive regulation of cellular protein localization	BIOLOGICAL_PROCESS	2.39059e-06	2.94358e-07	18	0	3611	4728
[OVER]	GO:0048562	embryonic organ morphogenesis	BIOLOGICAL_PROCESS	2.39059e-06	2.94358e-07	18	0	3611	4728
[OVER]	GO:0048589	developmental growth	BIOLOGICAL_PROCESS	2.39059e-06	2.94358e-07	18	0	3611	4728
[OVER]	GO:0001817	regulation of cytokine production	BIOLOGICAL_PROCESS	2.39059e-06	2.94358e-07	18	0	3611	4728
[OVER]	GO:0050867	positive regulation of cell activation	BIOLOGICAL_PROCESS	2.39059e-06	2.94358e-07	18	0	3611	4728
[OVER]	GO:0001505	regulation of neurotransmitter levels	BIOLOGICAL_PROCESS	2.39059e-06	2.94358e-07	18	0	3611	4728
[OVER]	GO:0030041	actin filament polymerization	BIOLOGICAL_PROCESS	2.39059e-06	2.94358e-07	18	0	3611	4728
[OVER]	GO:1903509	liposaccharide metabolic process	BIOLOGICAL_PROCESS	2.39059e-06	2.94358e-07	18	0	3611	4728
[OVER]	GO:0004497	monooxygenase activity	MOLECULAR_FUNCTION	2.39059e-06	2.94358e-07	18	0	3611	4728
[OVER]	GO:0072659	protein localization to plasma membrane	BIOLOGICAL_PROCESS	2.39059e-06	2.94358e-07	18	0	3611	4728
[OVER]	GO:0005802	trans-Golgi network	CELLULAR_COMPONENT	2.39059e-06	2.94358e-07	18	0	3611	4728
[OVER]	GO:0006936	muscle contraction	BIOLOGICAL_PROCESS	2.39059e-06	2.94358e-07	18	0	3611	4728
[OVER]	GO:0030594	neurotransmitter receptor activity	MOLECULAR_FUNCTION	2.39059e-06	2.94358e-07	18	0	3611	4728
[OVER]	GO:0000776	kinetochore	CELLULAR_COMPONENT	2.39059e-06	2.94358e-07	18	0	3611	4728
[OVER]	GO:0070371	ERK1 and ERK2 cascade	BIOLOGICAL_PROCESS	2.39059e-06	2.94358e-07	18	0	3611	4728
[OVER]	GO:0051249	regulation of lymphocyte activation	BIOLOGICAL_PROCESS	2.39059e-06	2.94358e-07	18	0	3611	4728
[OVER]	GO:0008360	regulation of cell shape	BIOLOGICAL_PROCESS	2.39059e-06	2.94358e-07	18	0	3611	4728
[OVER]	GO:0010810	regulation of cell-substrate adhesion	BIOLOGICAL_PROCESS	2.39059e-06	2.94358e-07	18	0	3611	4728
[OVER]	GO:0009411	response to UV	BIOLOGICAL_PROCESS	2.39059e-06	2.94358e-07	18	0	3611	4728
[OVER]	GO:0008170	N-methyltransferase activity	MOLECULAR_FUNCTION	2.39059e-06	2.94358e-07	18	0	3611	4728
[OVER]	GO:0009636	response to toxic substance	BIOLOGICAL_PROCESS	2.39059e-06	2.94358e-07	18	0	3611	4728
[OVER]	GO:0060828	regulation of canonical Wnt signaling pathway	BIOLOGICAL_PROCESS	2.39059e-06	2.94358e-07	18	0	3611	4728
[OVER]	GO:0051054	positive regulation of DNA metabolic process	BIOLOGICAL_PROCESS	2.39059e-06	2.94358e-07	18	0	3611	4728
[OVER]	GO:0007507	heart development	BIOLOGICAL_PROCESS	2.39059e-06	2.94358e-07	18	0	3611	4728
[OVER]	GO:0140297	DNA-binding transcription factor binding	MOLECULAR_FUNCTION	2.39059e-06	2.94358e-07	18	0	3611	4728
[OVER]	GO:0006364	rRNA processing	BIOLOGICAL_PROCESS	2.39059e-06	2.94358e-07	18	0	3611	4728
[OVER]	GO:0009991	response to extracellular stimulus	BIOLOGICAL_PROCESS	2.39059e-06	2.94358e-07	18	0	3611	4728
[OVER]	GO:0002443	leukocyte mediated immunity	BIOLOGICAL_PROCESS	2.39059e-06	2.94358e-07	18	0	3611	4728
[OVER]	GO:0015849	organic acid transport	BIOLOGICAL_PROCESS	2.39059e-06	2.94358e-07	18	0	3611	4728
[OVER]	GO:0044391	ribosomal subunit	CELLULAR_COMPONENT	2.39059e-06	2.94358e-07	18	0	3611	4728
[OVER]	GO:0098798	mitochondrial protein complex	CELLULAR_COMPONENT	2.47798e-06	3.08434e-07	21	1	3608	4727
[OVER]	GO:0098791	Golgi subcompartment	CELLULAR_COMPONENT	2.47798e-06	3.08434e-07	21	1	3608	4727
[OVER]	GO:0030286	dynein complex	CELLULAR_COMPONENT	2.47798e-06	3.08434e-07	21	1	3608	4727
[OVER]	GO:1901652	response to peptide	BIOLOGICAL_PROCESS	2.47798e-06	3.08434e-07	21	1	3608	4727
[OVER]	GO:0015276	ligand-gated ion channel activity	MOLECULAR_FUNCTION	2.47798e-06	3.08434e-07	21	1	3608	4727
[OVER]	GO:0035690	cellular response to drug	BIOLOGICAL_PROCESS	2.47798e-06	3.08434e-07	21	1	3608	4727
[OVER]	GO:0005819	spindle	CELLULAR_COMPONENT	2.47798e-06	3.08434e-07	21	1	3608	4727
[OVER]	GO:0031984	organelle subcompartment	CELLULAR_COMPONENT	2.47798e-06	3.08434e-07	21	1	3608	4727
[OVER]	GO:0022834	ligand-gated channel activity	MOLECULAR_FUNCTION	2.47798e-06	3.08434e-07	21	1	3608	4727
[OVER]	GO:1902115	regulation of organelle assembly	BIOLOGICAL_PROCESS	2.47798e-06	3.08434e-07	21	1	3608	4727
[OVER]	GO:0031301	integral component of organelle membrane	CELLULAR_COMPONENT	2.47798e-06	3.08434e-07	21	1	3608	4727
[OVER]	GO:0044389	ubiquitin-like protein ligase binding	MOLECULAR_FUNCTION	2.47798e-06	3.08434e-07	21	1	3608	4727
[OVER]	GO:0050808	synapse organization	BIOLOGICAL_PROCESS	3.69482e-06	4.60307e-07	23	2	3606	4726
[OVER]	GO:0051056	regulation of small GTPase mediated signal transduction	BIOLOGICAL_PROCESS	4.39008e-06	5.47903e-07	25	3	3604	4725
[OVER]	GO:0010951	negative regulation of endopeptidase activity	BIOLOGICAL_PROCESS	4.39008e-06	5.47903e-07	25	3	3604	4725
[OVER]	GO:0036464	cytoplasmic ribonucleoprotein granule	CELLULAR_COMPONENT	5.26009e-06	6.79663e-07	17	0	3612	4728
[OVER]	GO:0031625	ubiquitin protein ligase binding	MOLECULAR_FUNCTION	5.26009e-06	6.81125e-07	20	1	3609	4727
[OVER]	GO:0032993	protein-DNA complex	CELLULAR_COMPONENT	5.26009e-06	6.79663e-07	17	0	3612	4728
[OVER]	GO:0031667	response to nutrient levels	BIOLOGICAL_PROCESS	5.26009e-06	6.79663e-07	17	0	3612	4728
[OVER]	GO:0043583	ear development	BIOLOGICAL_PROCESS	5.26009e-06	6.79663e-07	17	0	3612	4728
[OVER]	GO:0050839	cell adhesion molecule binding	MOLECULAR_FUNCTION	5.26009e-06	6.81125e-07	20	1	3609	4727
[OVER]	GO:0050804	modulation of chemical synaptic transmission	BIOLOGICAL_PROCESS	5.26009e-06	6.79663e-07	17	0	3612	4728
[OVER]	GO:0031347	regulation of defense response	BIOLOGICAL_PROCESS	5.26009e-06	6.79663e-07	17	0	3612	4728
[OVER]	GO:0044843	cell cycle G1/S phase transition	BIOLOGICAL_PROCESS	5.26009e-06	6.79663e-07	17	0	3612	4728
[OVER]	GO:0032886	regulation of microtubule-based process	BIOLOGICAL_PROCESS	5.26009e-06	6.81125e-07	20	1	3609	4727
[OVER]	GO:0005743	mitochondrial inner membrane	CELLULAR_COMPONENT	5.26009e-06	6.81125e-07	20	1	3609	4727
[OVER]	GO:0060537	muscle tissue development	BIOLOGICAL_PROCESS	5.26009e-06	6.79663e-07	17	0	3612	4728
[OVER]	GO:1902905	positive regulation of supramolecular fiber organization	BIOLOGICAL_PROCESS	5.26009e-06	6.79663e-07	17	0	3612	4728
[OVER]	GO:0042826	histone deacetylase binding	MOLECULAR_FUNCTION	5.26009e-06	6.79663e-07	17	0	3612	4728
[OVER]	GO:0030832	regulation of actin filament length	BIOLOGICAL_PROCESS	5.26009e-06	6.79663e-07	17	0	3612	4728
[OVER]	GO:0008064	regulation of actin polymerization or depolymerization	BIOLOGICAL_PROCESS	5.26009e-06	6.79663e-07	17	0	3612	4728
[OVER]	GO:0071013	catalytic step 2 spliceosome	CELLULAR_COMPONENT	5.26009e-06	6.79663e-07	17	0	3612	4728
[OVER]	GO:0016197	endosomal transport	BIOLOGICAL_PROCESS	5.26009e-06	6.79663e-07	17	0	3612	4728
[OVER]	GO:0050900	leukocyte migration	BIOLOGICAL_PROCESS	5.26009e-06	6.79663e-07	17	0	3612	4728
[OVER]	GO:0010038	response to metal ion	BIOLOGICAL_PROCESS	5.26009e-06	6.79663e-07	17	0	3612	4728
[OVER]	GO:1901343	negative regulation of vasculature development	BIOLOGICAL_PROCESS	5.26009e-06	6.79663e-07	17	0	3612	4728
[OVER]	GO:0006979	response to oxidative stress	BIOLOGICAL_PROCESS	5.26009e-06	6.81125e-07	20	1	3609	4727
[OVER]	GO:0071166	ribonucleoprotein complex localization	BIOLOGICAL_PROCESS	5.26009e-06	6.79663e-07	17	0	3612	4728
[OVER]	GO:0051222	positive regulation of protein transport	BIOLOGICAL_PROCESS	5.26009e-06	6.79663e-07	17	0	3612	4728
[OVER]	GO:0020037	heme binding	MOLECULAR_FUNCTION	5.26009e-06	6.79663e-07	17	0	3612	4728
[OVER]	GO:0099177	regulation of trans-synaptic signaling	BIOLOGICAL_PROCESS	5.26009e-06	6.79663e-07	17	0	3612	4728
[OVER]	GO:0071496	cellular response to external stimulus	BIOLOGICAL_PROCESS	5.26009e-06	6.79663e-07	17	0	3612	4728
[OVER]	GO:0022407	regulation of cell-cell adhesion	BIOLOGICAL_PROCESS	5.26009e-06	6.79663e-07	17	0	3612	4728
[OVER]	GO:0046467	membrane lipid biosynthetic process	BIOLOGICAL_PROCESS	5.26009e-06	6.79663e-07	17	0	3612	4728
[OVER]	GO:0071426	ribonucleoprotein complex export from nucleus	BIOLOGICAL_PROCESS	5.26009e-06	6.79663e-07	17	0	3612	4728
[OVER]	GO:0033157	regulation of intracellular protein transport	BIOLOGICAL_PROCESS	5.26009e-06	6.79663e-07	17	0	3612	4728
[OVER]	GO:0071560	cellular response to transforming growth factor beta stimulus	BIOLOGICAL_PROCESS	5.26009e-06	6.79663e-07	17	0	3612	4728
[OVER]	GO:0009617	response to bacterium	BIOLOGICAL_PROCESS	5.26009e-06	6.79663e-07	17	0	3612	4728
[OVER]	GO:0071559	response to transforming growth factor beta	BIOLOGICAL_PROCESS	5.26009e-06	6.79663e-07	17	0	3612	4728
[OVER]	GO:0045216	cell-cell junction organization	BIOLOGICAL_PROCESS	5.26009e-06	6.79663e-07	17	0	3612	4728
[OVER]	GO:0021953	central nervous system neuron differentiation	BIOLOGICAL_PROCESS	5.26009e-06	6.79663e-07	17	0	3612	4728
[OVER]	GO:0046906	tetrapyrrole binding	MOLECULAR_FUNCTION	5.26009e-06	6.79663e-07	17	0	3612	4728
[OVER]	GO:0008654	phospholipid biosynthetic process	BIOLOGICAL_PROCESS	5.26009e-06	6.79663e-07	17	0	3612	4728
[OVER]	GO:0019216	regulation of lipid metabolic process	BIOLOGICAL_PROCESS	5.26009e-06	6.79663e-07	17	0	3612	4728
[OVER]	GO:0007411	axon guidance	BIOLOGICAL_PROCESS	5.26009e-06	6.79663e-07	17	0	3612	4728
[OVER]	GO:0046942	carboxylic acid transport	BIOLOGICAL_PROCESS	5.26009e-06	6.79663e-07	17	0	3612	4728
[OVER]	GO:0043062	extracellular structure organization	BIOLOGICAL_PROCESS	5.26009e-06	6.81125e-07	20	1	3609	4727
[OVER]	GO:0043413	macromolecule glycosylation	BIOLOGICAL_PROCESS	7.53737e-06	9.81052e-07	22	2	3607	4726
[OVER]	GO:0006486	protein glycosylation	BIOLOGICAL_PROCESS	7.53737e-06	9.81052e-07	22	2	3607	4726
[OVER]	GO:0070085	glycosylation	BIOLOGICAL_PROCESS	7.53737e-06	9.81052e-07	22	2	3607	4726
[OVER]	GO:0099023	vesicle tethering complex	CELLULAR_COMPONENT	7.53737e-06	9.81052e-07	22	2	3607	4726
[OVER]	GO:0018105	peptidyl-serine phosphorylation	BIOLOGICAL_PROCESS	7.53737e-06	9.81052e-07	22	2	3607	4726
[OVER]	GO:0055065	metal ion homeostasis	BIOLOGICAL_PROCESS	7.53737e-06	9.81052e-07	22	2	3607	4726
[OVER]	GO:0004553	hydrolase activity, hydrolyzing O-glycosyl compounds	MOLECULAR_FUNCTION	8.32906e-06	1.08503e-06	28	5	3601	4723
[OVER]	GO:0008081	phosphoric diester hydrolase activity	MOLECULAR_FUNCTION	8.68637e-06	1.13448e-06	24	3	3605	4725
[OVER]	GO:0004866	endopeptidase inhibitor activity	MOLECULAR_FUNCTION	8.68637e-06	1.13448e-06	24	3	3605	4725
[OVER]	GO:0015748	organophosphate ester transport	BIOLOGICAL_PROCESS	8.68637e-06	1.13448e-06	24	3	3605	4725
[OVER]	GO:0015103	inorganic anion transmembrane transporter activity	MOLECULAR_FUNCTION	1.14419e-05	1.50074e-06	19	1	3610	4727
[OVER]	GO:1901653	cellular response to peptide	BIOLOGICAL_PROCESS	1.14419e-05	1.50074e-06	19	1	3610	4727
[OVER]	GO:0015079	potassium ion transmembrane transporter activity	MOLECULAR_FUNCTION	1.14419e-05	1.50074e-06	19	1	3610	4727
[OVER]	GO:0051213	dioxygenase activity	MOLECULAR_FUNCTION	1.14419e-05	1.50074e-06	19	1	3610	4727
[OVER]	GO:0051015	actin filament binding	MOLECULAR_FUNCTION	1.14419e-05	1.50074e-06	19	1	3610	4727
[OVER]	GO:0006606	protein import into nucleus	BIOLOGICAL_PROCESS	1.1475e-05	1.56908e-06	16	0	3613	4728
[OVER]	GO:2000181	negative regulation of blood vessel morphogenesis	BIOLOGICAL_PROCESS	1.1475e-05	1.56908e-06	16	0	3613	4728
[OVER]	GO:0043624	cellular protein complex disassembly	BIOLOGICAL_PROCESS	1.1475e-05	1.56908e-06	16	0	3613	4728
[OVER]	GO:0061572	actin filament bundle organization	BIOLOGICAL_PROCESS	1.1475e-05	1.56908e-06	16	0	3613	4728
[OVER]	GO:0098857	membrane microdomain	CELLULAR_COMPONENT	1.1475e-05	1.56908e-06	16	0	3613	4728
[OVER]	GO:0006790	sulfur compound metabolic process	BIOLOGICAL_PROCESS	1.1475e-05	1.56908e-06	16	0	3613	4728
[OVER]	GO:0001822	kidney development	BIOLOGICAL_PROCESS	1.1475e-05	1.56908e-06	16	0	3613	4728
[OVER]	GO:0006406	mRNA export from nucleus	BIOLOGICAL_PROCESS	1.1475e-05	1.56908e-06	16	0	3613	4728
[OVER]	GO:0120114	Sm-like protein family complex	CELLULAR_COMPONENT	1.1475e-05	1.56908e-06	16	0	3613	4728
[OVER]	GO:0098589	membrane region	CELLULAR_COMPONENT	1.1475e-05	1.56908e-06	16	0	3613	4728
[OVER]	GO:0098562	cytoplasmic side of membrane	CELLULAR_COMPONENT	1.1475e-05	1.56908e-06	16	0	3613	4728
[OVER]	GO:0051961	negative regulation of nervous system development	BIOLOGICAL_PROCESS	1.1475e-05	1.56908e-06	16	0	3613	4728
[OVER]	GO:0001650	fibrillar center	CELLULAR_COMPONENT	1.1475e-05	1.56908e-06	16	0	3613	4728
[OVER]	GO:0005798	Golgi-associated vesicle	CELLULAR_COMPONENT	1.1475e-05	1.56908e-06	16	0	3613	4728
[OVER]	GO:0005774	vacuolar membrane	CELLULAR_COMPONENT	1.1475e-05	1.56908e-06	16	0	3613	4728
[OVER]	GO:0005777	peroxisome	CELLULAR_COMPONENT	1.1475e-05	1.56908e-06	16	0	3613	4728
[OVER]	GO:0010212	response to ionizing radiation	BIOLOGICAL_PROCESS	1.1475e-05	1.56908e-06	16	0	3613	4728
[OVER]	GO:0048872	homeostasis of number of cells	BIOLOGICAL_PROCESS	1.1475e-05	1.56908e-06	16	0	3613	4728
[OVER]	GO:0016525	negative regulation of angiogenesis	BIOLOGICAL_PROCESS	1.1475e-05	1.56908e-06	16	0	3613	4728
[OVER]	GO:0045055	regulated exocytosis	BIOLOGICAL_PROCESS	1.1475e-05	1.56908e-06	16	0	3613	4728
[OVER]	GO:0030833	regulation of actin filament polymerization	BIOLOGICAL_PROCESS	1.1475e-05	1.56908e-06	16	0	3613	4728
[OVER]	GO:1902850	microtubule cytoskeleton organization involved in mitosis	BIOLOGICAL_PROCESS	1.1475e-05	1.56908e-06	16	0	3613	4728
[OVER]	GO:0034062	5'-3' RNA polymerase activity	MOLECULAR_FUNCTION	1.1475e-05	1.56908e-06	16	0	3613	4728
[OVER]	GO:0090132	epithelium migration	BIOLOGICAL_PROCESS	1.1475e-05	1.56908e-06	16	0	3613	4728
[OVER]	GO:0090130	tissue migration	BIOLOGICAL_PROCESS	1.1475e-05	1.56908e-06	16	0	3613	4728
[OVER]	GO:0097747	RNA polymerase activity	MOLECULAR_FUNCTION	1.1475e-05	1.56908e-06	16	0	3613	4728
[OVER]	GO:0097730	non-motile cilium	CELLULAR_COMPONENT	1.1475e-05	1.56908e-06	16	0	3613	4728
[OVER]	GO:0031929	TOR signaling	BIOLOGICAL_PROCESS	1.1475e-05	1.56908e-06	16	0	3613	4728
[OVER]	GO:0042579	microbody	CELLULAR_COMPONENT	1.1475e-05	1.56908e-06	16	0	3613	4728
[OVER]	GO:0009108	coenzyme biosynthetic process	BIOLOGICAL_PROCESS	1.1475e-05	1.56908e-06	16	0	3613	4728
[OVER]	GO:0051271	negative regulation of cellular component movement	BIOLOGICAL_PROCESS	1.1475e-05	1.56908e-06	16	0	3613	4728
[OVER]	GO:0010631	epithelial cell migration	BIOLOGICAL_PROCESS	1.1475e-05	1.56908e-06	16	0	3613	4728
[OVER]	GO:0051170	import into nucleus	BIOLOGICAL_PROCESS	1.1475e-05	1.56908e-06	16	0	3613	4728
[OVER]	GO:0032006	regulation of TOR signaling	BIOLOGICAL_PROCESS	1.1475e-05	1.56908e-06	16	0	3613	4728
[OVER]	GO:0046474	glycerophospholipid biosynthetic process	BIOLOGICAL_PROCESS	1.1475e-05	1.56908e-06	16	0	3613	4728
[OVER]	GO:0071427	mRNA-containing ribonucleoprotein complex export from nucleus	BIOLOGICAL_PROCESS	1.1475e-05	1.56908e-06	16	0	3613	4728
[OVER]	GO:0016605	PML body	CELLULAR_COMPONENT	1.1475e-05	1.56908e-06	16	0	3613	4728
[OVER]	GO:0045121	membrane raft	CELLULAR_COMPONENT	1.1475e-05	1.56908e-06	16	0	3613	4728
[OVER]	GO:0008276	protein methyltransferase activity	MOLECULAR_FUNCTION	1.1475e-05	1.56908e-06	16	0	3613	4728
[OVER]	GO:1902105	regulation of leukocyte differentiation	BIOLOGICAL_PROCESS	1.1475e-05	1.56908e-06	16	0	3613	4728
[OVER]	GO:0051604	protein maturation	BIOLOGICAL_PROCESS	1.1475e-05	1.56908e-06	16	0	3613	4728
[OVER]	GO:0000082	G1/S transition of mitotic cell cycle	BIOLOGICAL_PROCESS	1.1475e-05	1.56908e-06	16	0	3613	4728
[OVER]	GO:0002683	negative regulation of immune system process	BIOLOGICAL_PROCESS	1.1475e-05	1.56908e-06	16	0	3613	4728
[OVER]	GO:1903362	regulation of cellular protein catabolic process	BIOLOGICAL_PROCESS	1.1475e-05	1.56908e-06	16	0	3613	4728
[OVER]	GO:0006261	DNA-dependent DNA replication	BIOLOGICAL_PROCESS	1.1475e-05	1.56908e-06	16	0	3613	4728
[OVER]	GO:0015893	drug transport	BIOLOGICAL_PROCESS	1.1475e-05	1.56908e-06	16	0	3613	4728
[OVER]	GO:0018022	peptidyl-lysine methylation	BIOLOGICAL_PROCESS	1.1475e-05	1.56908e-06	16	0	3613	4728
[OVER]	GO:1903050	regulation of proteolysis involved in cellular protein catabolic process	BIOLOGICAL_PROCESS	1.1475e-05	1.56908e-06	16	0	3613	4728
[OVER]	GO:0032388	positive regulation of intracellular transport	BIOLOGICAL_PROCESS	1.1475e-05	1.56908e-06	16	0	3613	4728
[OVER]	GO:0003899	DNA-directed 5'-3' RNA polymerase activity	MOLECULAR_FUNCTION	1.1475e-05	1.56908e-06	16	0	3613	4728
[OVER]	GO:0016298	lipase activity	MOLECULAR_FUNCTION	1.52125e-05	2.08353e-06	21	2	3608	4726
[OVER]	GO:0070588	calcium ion transmembrane transport	BIOLOGICAL_PROCESS	1.52125e-05	2.08353e-06	21	2	3608	4726
[OVER]	GO:0030414	peptidase inhibitor activity	MOLECULAR_FUNCTION	1.69486e-05	2.3251e-06	25	4	3604	4724
[OVER]	GO:0005875	microtubule associated complex	CELLULAR_COMPONENT	1.69486e-05	2.3251e-06	25	4	3604	4724
[OVER]	GO:0030424	axon	CELLULAR_COMPONENT	2.38691e-05	3.29844e-06	18	1	3611	4727
[OVER]	GO:0006414	translational elongation	BIOLOGICAL_PROCESS	2.38691e-05	3.29844e-06	18	1	3611	4727
[OVER]	GO:0019898	extrinsic component of membrane	CELLULAR_COMPONENT	2.38691e-05	3.29844e-06	18	1	3611	4727
[OVER]	GO:0007098	centrosome cycle	BIOLOGICAL_PROCESS	2.38691e-05	3.29844e-06	18	1	3611	4727
[OVER]	GO:0010506	regulation of autophagy	BIOLOGICAL_PROCESS	2.38691e-05	3.29844e-06	18	1	3611	4727
[OVER]	GO:1905368	peptidase complex	CELLULAR_COMPONENT	2.38691e-05	3.29844e-06	18	1	3611	4727
[OVER]	GO:0036064	ciliary basal body	CELLULAR_COMPONENT	2.38691e-05	3.29844e-06	18	1	3611	4727
[OVER]	GO:0031023	microtubule organizing center organization	BIOLOGICAL_PROCESS	2.38691e-05	3.29844e-06	18	1	3611	4727
[OVER]	GO:0032392	DNA geometric change	BIOLOGICAL_PROCESS	2.38691e-05	3.29844e-06	18	1	3611	4727
[OVER]	GO:0061458	reproductive system development	BIOLOGICAL_PROCESS	2.50952e-05	3.62181e-06	15	0	3614	4728
[OVER]	GO:0098732	macromolecule deacylation	BIOLOGICAL_PROCESS	2.50952e-05	3.62181e-06	15	0	3614	4728
[OVER]	GO:0050768	negative regulation of neurogenesis	BIOLOGICAL_PROCESS	2.50952e-05	3.62181e-06	15	0	3614	4728
[OVER]	GO:0060285	cilium-dependent cell motility	BIOLOGICAL_PROCESS	2.50952e-05	3.62181e-06	15	0	3614	4728
[OVER]	GO:0048511	rhythmic process	BIOLOGICAL_PROCESS	2.50952e-05	3.62181e-06	15	0	3614	4728
[OVER]	GO:1904950	negative regulation of establishment of protein localization	BIOLOGICAL_PROCESS	2.50952e-05	3.62181e-06	15	0	3614	4728
[OVER]	GO:0031346	positive regulation of cell projection organization	BIOLOGICAL_PROCESS	2.50952e-05	3.62181e-06	15	0	3614	4728
[OVER]	GO:0030098	lymphocyte differentiation	BIOLOGICAL_PROCESS	2.50952e-05	3.62181e-06	15	0	3614	4728
[OVER]	GO:0001539	cilium or flagellum-dependent cell motility	BIOLOGICAL_PROCESS	2.50952e-05	3.62181e-06	15	0	3614	4728
[OVER]	GO:0051962	positive regulation of nervous system development	BIOLOGICAL_PROCESS	2.50952e-05	3.62181e-06	15	0	3614	4728
[OVER]	GO:0042110	T cell activation	BIOLOGICAL_PROCESS	2.50952e-05	3.62181e-06	15	0	3614	4728
[OVER]	GO:0030168	platelet activation	BIOLOGICAL_PROCESS	2.50952e-05	3.62181e-06	15	0	3614	4728
[OVER]	GO:0000381	regulation of alternative mRNA splicing, via spliceosome	BIOLOGICAL_PROCESS	2.50952e-05	3.62181e-06	15	0	3614	4728
[OVER]	GO:0000380	alternative mRNA splicing, via spliceosome	BIOLOGICAL_PROCESS	2.50952e-05	3.62181e-06	15	0	3614	4728
[OVER]	GO:0071241	cellular response to inorganic substance	BIOLOGICAL_PROCESS	2.50952e-05	3.62181e-06	15	0	3614	4728
[OVER]	GO:0060562	epithelial tube morphogenesis	BIOLOGICAL_PROCESS	2.50952e-05	3.62181e-06	15	0	3614	4728
[OVER]	GO:0016458	gene silencing	BIOLOGICAL_PROCESS	2.50952e-05	3.62181e-06	15	0	3614	4728
[OVER]	GO:1902904	negative regulation of supramolecular fiber organization	BIOLOGICAL_PROCESS	2.50952e-05	3.62181e-06	15	0	3614	4728
[OVER]	GO:0005814	centriole	CELLULAR_COMPONENT	2.50952e-05	3.62181e-06	15	0	3614	4728
[OVER]	GO:0006839	mitochondrial transport	BIOLOGICAL_PROCESS	2.50952e-05	3.62181e-06	15	0	3614	4728
[OVER]	GO:0072330	monocarboxylic acid biosynthetic process	BIOLOGICAL_PROCESS	2.50952e-05	3.62181e-06	15	0	3614	4728
[OVER]	GO:0098984	neuron to neuron synapse	CELLULAR_COMPONENT	2.50952e-05	3.62181e-06	15	0	3614	4728
[OVER]	GO:2001252	positive regulation of chromosome organization	BIOLOGICAL_PROCESS	2.50952e-05	3.62181e-06	15	0	3614	4728
[OVER]	GO:0016236	macroautophagy	BIOLOGICAL_PROCESS	2.50952e-05	3.62181e-06	15	0	3614	4728
[OVER]	GO:0030496	midbody	CELLULAR_COMPONENT	2.50952e-05	3.62181e-06	15	0	3614	4728
[OVER]	GO:0061629	RNA polymerase II-specific DNA-binding transcription factor binding	MOLECULAR_FUNCTION	2.50952e-05	3.62181e-06	15	0	3614	4728
[OVER]	GO:0048608	reproductive structure development	BIOLOGICAL_PROCESS	2.50952e-05	3.62181e-06	15	0	3614	4728
[OVER]	GO:0060485	mesenchyme development	BIOLOGICAL_PROCESS	2.50952e-05	3.62181e-06	15	0	3614	4728
[OVER]	GO:0070372	regulation of ERK1 and ERK2 cascade	BIOLOGICAL_PROCESS	2.50952e-05	3.62181e-06	15	0	3614	4728
[OVER]	GO:0009755	hormone-mediated signaling pathway	BIOLOGICAL_PROCESS	2.50952e-05	3.62181e-06	15	0	3614	4728
[OVER]	GO:0051224	negative regulation of protein transport	BIOLOGICAL_PROCESS	2.50952e-05	3.62181e-06	15	0	3614	4728
[OVER]	GO:0051225	spindle assembly	BIOLOGICAL_PROCESS	2.50952e-05	3.62181e-06	15	0	3614	4728
[OVER]	GO:0099111	microtubule-based transport	BIOLOGICAL_PROCESS	2.50952e-05	3.62181e-06	15	0	3614	4728
[OVER]	GO:0010811	positive regulation of cell-substrate adhesion	BIOLOGICAL_PROCESS	2.50952e-05	3.62181e-06	15	0	3614	4728
[OVER]	GO:0051348	negative regulation of transferase activity	BIOLOGICAL_PROCESS	2.50952e-05	3.62181e-06	15	0	3614	4728
[OVER]	GO:0032103	positive regulation of response to external stimulus	BIOLOGICAL_PROCESS	2.50952e-05	3.62181e-06	15	0	3614	4728
[OVER]	GO:0007162	negative regulation of cell adhesion	BIOLOGICAL_PROCESS	2.50952e-05	3.62181e-06	15	0	3614	4728
[OVER]	GO:0045454	cell redox homeostasis	BIOLOGICAL_PROCESS	2.50952e-05	3.62181e-06	15	0	3614	4728
[OVER]	GO:0051017	actin filament bundle assembly	BIOLOGICAL_PROCESS	2.50952e-05	3.62181e-06	15	0	3614	4728
[OVER]	GO:0034446	substrate adhesion-dependent cell spreading	BIOLOGICAL_PROCESS	2.50952e-05	3.62181e-06	15	0	3614	4728
[OVER]	GO:0045165	cell fate commitment	BIOLOGICAL_PROCESS	2.50952e-05	3.62181e-06	15	0	3614	4728
[OVER]	GO:0034502	protein localization to chromosome	BIOLOGICAL_PROCESS	2.50952e-05	3.62181e-06	15	0	3614	4728
[OVER]	GO:0045732	positive regulation of protein catabolic process	BIOLOGICAL_PROCESS	2.50952e-05	3.62181e-06	15	0	3614	4728
[OVER]	GO:0099572	postsynaptic specialization	CELLULAR_COMPONENT	2.50952e-05	3.62181e-06	15	0	3614	4728
[OVER]	GO:0007626	locomotory behavior	BIOLOGICAL_PROCESS	2.50952e-05	3.62181e-06	15	0	3614	4728
[OVER]	GO:0006282	regulation of DNA repair	BIOLOGICAL_PROCESS	2.50952e-05	3.62181e-06	15	0	3614	4728
[OVER]	GO:0043292	contractile fiber	CELLULAR_COMPONENT	2.50952e-05	3.62181e-06	15	0	3614	4728
[OVER]	GO:0043296	apical junction complex	CELLULAR_COMPONENT	2.50952e-05	3.62181e-06	15	0	3614	4728
[OVER]	GO:0010959	regulation of metal ion transport	BIOLOGICAL_PROCESS	2.50952e-05	3.62181e-06	15	0	3614	4728
[OVER]	GO:0009898	cytoplasmic side of plasma membrane	CELLULAR_COMPONENT	2.50952e-05	3.62181e-06	15	0	3614	4728
[OVER]	GO:0007249	I-kappaB kinase/NF-kappaB signaling	BIOLOGICAL_PROCESS	2.50952e-05	3.62181e-06	15	0	3614	4728
[OVER]	GO:0003714	transcription corepressor activity	MOLECULAR_FUNCTION	2.50952e-05	3.62181e-06	15	0	3614	4728
[OVER]	GO:0034968	histone lysine methylation	BIOLOGICAL_PROCESS	2.50952e-05	3.62181e-06	15	0	3614	4728
[OVER]	GO:0001227	DNA-binding transcription repressor activity, RNA polymerase II-specific	MOLECULAR_FUNCTION	2.50952e-05	3.62181e-06	15	0	3614	4728
[OVER]	GO:0001217	DNA-binding transcription repressor activity	MOLECULAR_FUNCTION	2.50952e-05	3.62181e-06	15	0	3614	4728
[OVER]	GO:0000819	sister chromatid segregation	BIOLOGICAL_PROCESS	2.90267e-05	4.19245e-06	26	5	3603	4723
[OVER]	GO:0000413	protein peptidyl-prolyl isomerization	BIOLOGICAL_PROCESS	3.02854e-05	4.40804e-06	20	2	3609	4726
[OVER]	GO:0030003	cellular cation homeostasis	BIOLOGICAL_PROCESS	3.02854e-05	4.40804e-06	20	2	3609	4726
[OVER]	GO:0061659	ubiquitin-like protein ligase activity	MOLECULAR_FUNCTION	3.02854e-05	4.40804e-06	20	2	3609	4726
[OVER]	GO:0006873	cellular ion homeostasis	BIOLOGICAL_PROCESS	3.02854e-05	4.40804e-06	20	2	3609	4726
[OVER]	GO:0061630	ubiquitin protein ligase activity	MOLECULAR_FUNCTION	3.02854e-05	4.40804e-06	20	2	3609	4726
[OVER]	GO:0016859	cis-trans isomerase activity	MOLECULAR_FUNCTION	3.02854e-05	4.40804e-06	20	2	3609	4726
[OVER]	GO:0015698	inorganic anion transport	BIOLOGICAL_PROCESS	3.02854e-05	4.40804e-06	20	2	3609	4726
[OVER]	GO:0008514	organic anion transmembrane transporter activity	MOLECULAR_FUNCTION	3.02854e-05	4.40804e-06	20	2	3609	4726
[OVER]	GO:0044242	cellular lipid catabolic process	BIOLOGICAL_PROCESS	3.02854e-05	4.40804e-06	20	2	3609	4726
[OVER]	GO:0003755	peptidyl-prolyl cis-trans isomerase activity	MOLECULAR_FUNCTION	3.02854e-05	4.40804e-06	20	2	3609	4726
[OVER]	GO:0044403	symbiotic process	BIOLOGICAL_PROCESS	3.19259e-05	4.65394e-06	24	4	3605	4724
[OVER]	GO:0099503	secretory vesicle	CELLULAR_COMPONENT	3.19259e-05	4.65394e-06	24	4	3605	4724
[OVER]	GO:1904949	ATPase complex	CELLULAR_COMPONENT	4.92201e-05	7.22985e-06	17	1	3612	4727
[OVER]	GO:0005126	cytokine receptor binding	MOLECULAR_FUNCTION	4.92201e-05	7.22985e-06	17	1	3612	4727
[OVER]	GO:0030055	cell-substrate junction	CELLULAR_COMPONENT	4.92201e-05	7.22985e-06	17	1	3612	4727
[OVER]	GO:0042063	gliogenesis	BIOLOGICAL_PROCESS	4.92201e-05	7.22985e-06	17	1	3612	4727
[OVER]	GO:0005267	potassium channel activity	MOLECULAR_FUNCTION	4.92201e-05	7.22985e-06	17	1	3612	4727
[OVER]	GO:0006888	endoplasmic reticulum to Golgi vesicle-mediated transport	BIOLOGICAL_PROCESS	4.92201e-05	7.22985e-06	17	1	3612	4727
[OVER]	GO:0042692	muscle cell differentiation	BIOLOGICAL_PROCESS	4.92201e-05	7.22985e-06	17	1	3612	4727
[OVER]	GO:0022412	cellular process involved in reproduction in multicellular organism	BIOLOGICAL_PROCESS	4.92201e-05	7.22985e-06	17	1	3612	4727
[OVER]	GO:0070507	regulation of microtubule cytoskeleton organization	BIOLOGICAL_PROCESS	4.92201e-05	7.22985e-06	17	1	3612	4727
[OVER]	GO:0070603	SWI/SNF superfamily-type complex	CELLULAR_COMPONENT	4.92201e-05	7.22985e-06	17	1	3612	4727
[OVER]	GO:0050792	regulation of viral process	BIOLOGICAL_PROCESS	5.44653e-05	8.35872e-06	14	0	3615	4728
[OVER]	GO:0036477	somatodendritic compartment	CELLULAR_COMPONENT	5.44653e-05	8.35872e-06	14	0	3615	4728
[OVER]	GO:2000146	negative regulation of cell motility	BIOLOGICAL_PROCESS	5.44653e-05	8.35872e-06	14	0	3615	4728
[OVER]	GO:0006661	phosphatidylinositol biosynthetic process	BIOLOGICAL_PROCESS	5.44653e-05	8.35872e-06	14	0	3615	4728
[OVER]	GO:0098862	cluster of actin-based cell projections	CELLULAR_COMPONENT	5.44653e-05	8.35872e-06	14	0	3615	4728
[OVER]	GO:1902493	acetyltransferase complex	CELLULAR_COMPONENT	5.44653e-05	8.35872e-06	14	0	3615	4728
[OVER]	GO:0017053	transcriptional repressor complex	CELLULAR_COMPONENT	5.44653e-05	8.35872e-06	14	0	3615	4728
[OVER]	GO:0030016	myofibril	CELLULAR_COMPONENT	5.44653e-05	8.35872e-06	14	0	3615	4728
[OVER]	GO:0001503	ossification	BIOLOGICAL_PROCESS	5.44653e-05	8.35872e-06	14	0	3615	4728
[OVER]	GO:0000245	spliceosomal complex assembly	BIOLOGICAL_PROCESS	5.44653e-05	8.35872e-06	14	0	3615	4728
[OVER]	GO:0019897	extrinsic component of plasma membrane	CELLULAR_COMPONENT	5.44653e-05	8.35872e-06	14	0	3615	4728
[OVER]	GO:0017157	regulation of exocytosis	BIOLOGICAL_PROCESS	5.44653e-05	8.35872e-06	14	0	3615	4728
[OVER]	GO:0001664	G protein-coupled receptor binding	MOLECULAR_FUNCTION	5.44653e-05	8.35872e-06	14	0	3615	4728
[OVER]	GO:0030705	cytoskeleton-dependent intracellular transport	BIOLOGICAL_PROCESS	5.44653e-05	8.35872e-06	14	0	3615	4728
[OVER]	GO:0071248	cellular response to metal ion	BIOLOGICAL_PROCESS	5.44653e-05	8.35872e-06	14	0	3615	4728
[OVER]	GO:1901681	sulfur compound binding	MOLECULAR_FUNCTION	5.44653e-05	8.35872e-06	14	0	3615	4728
[OVER]	GO:0005769	early endosome	CELLULAR_COMPONENT	5.44653e-05	8.35872e-06	14	0	3615	4728
[OVER]	GO:1901657	glycosyl compound metabolic process	BIOLOGICAL_PROCESS	5.44653e-05	8.35872e-06	14	0	3615	4728
[OVER]	GO:0048839	inner ear development	BIOLOGICAL_PROCESS	5.44653e-05	8.35872e-06	14	0	3615	4728
[OVER]	GO:1902911	protein kinase complex	CELLULAR_COMPONENT	5.44653e-05	8.35872e-06	14	0	3615	4728
[OVER]	GO:0045087	innate immune response	BIOLOGICAL_PROCESS	5.44653e-05	8.35872e-06	14	0	3615	4728
[OVER]	GO:0008022	protein C-terminus binding	MOLECULAR_FUNCTION	5.44653e-05	8.35872e-06	14	0	3615	4728
[OVER]	GO:0035601	protein deacylation	BIOLOGICAL_PROCESS	5.44653e-05	8.35872e-06	14	0	3615	4728
[OVER]	GO:0030532	small nuclear ribonucleoprotein complex	CELLULAR_COMPONENT	5.44653e-05	8.35872e-06	14	0	3615	4728
[OVER]	GO:0034032	purine nucleoside bisphosphate metabolic process	BIOLOGICAL_PROCESS	5.44653e-05	8.35872e-06	14	0	3615	4728
[OVER]	GO:0043903	regulation of symbiosis, encompassing mutualism through parasitism	BIOLOGICAL_PROCESS	5.44653e-05	8.35872e-06	14	0	3615	4728
[OVER]	GO:0005643	nuclear pore	CELLULAR_COMPONENT	5.44653e-05	8.35872e-06	14	0	3615	4728
[OVER]	GO:0097731	9+0 non-motile cilium	CELLULAR_COMPONENT	5.44653e-05	8.35872e-06	14	0	3615	4728
[OVER]	GO:0097733	photoreceptor cell cilium	CELLULAR_COMPONENT	5.44653e-05	8.35872e-06	14	0	3615	4728
[OVER]	GO:0040013	negative regulation of locomotion	BIOLOGICAL_PROCESS	5.44653e-05	8.35872e-06	14	0	3615	4728
[OVER]	GO:0015078	proton transmembrane transporter activity	MOLECULAR_FUNCTION	5.44653e-05	8.35872e-06	14	0	3615	4728
[OVER]	GO:0015081	sodium ion transmembrane transporter activity	MOLECULAR_FUNCTION	5.44653e-05	8.35872e-06	14	0	3615	4728
[OVER]	GO:0009116	nucleoside metabolic process	BIOLOGICAL_PROCESS	5.44653e-05	8.35872e-06	14	0	3615	4728
[OVER]	GO:0090287	regulation of cellular response to growth factor stimulus	BIOLOGICAL_PROCESS	5.44653e-05	8.35872e-06	14	0	3615	4728
[OVER]	GO:0016875	ligase activity, forming carbon-oxygen bonds	MOLECULAR_FUNCTION	5.44653e-05	8.35872e-06	14	0	3615	4728
[OVER]	GO:1903034	regulation of response to wounding	BIOLOGICAL_PROCESS	5.44653e-05	8.35872e-06	14	0	3615	4728
[OVER]	GO:0004812	aminoacyl-tRNA ligase activity	MOLECULAR_FUNCTION	5.44653e-05	8.35872e-06	14	0	3615	4728
[OVER]	GO:0004867	serine-type endopeptidase inhibitor activity	MOLECULAR_FUNCTION	5.44653e-05	8.35872e-06	14	0	3615	4728
[OVER]	GO:0007179	transforming growth factor beta receptor signaling pathway	BIOLOGICAL_PROCESS	5.44653e-05	8.35872e-06	14	0	3615	4728
[OVER]	GO:0007159	leukocyte cell-cell adhesion	BIOLOGICAL_PROCESS	5.44653e-05	8.35872e-06	14	0	3615	4728
[OVER]	GO:1901989	positive regulation of cell cycle phase transition	BIOLOGICAL_PROCESS	5.44653e-05	8.35872e-06	14	0	3615	4728
[OVER]	GO:0005996	monosaccharide metabolic process	BIOLOGICAL_PROCESS	5.44653e-05	8.35872e-06	14	0	3615	4728
[OVER]	GO:0071482	cellular response to light stimulus	BIOLOGICAL_PROCESS	5.44653e-05	8.35872e-06	14	0	3615	4728
[OVER]	GO:0009615	response to virus	BIOLOGICAL_PROCESS	5.44653e-05	8.35872e-06	14	0	3615	4728
[OVER]	GO:0008202	steroid metabolic process	BIOLOGICAL_PROCESS	5.44653e-05	8.35872e-06	14	0	3615	4728
[OVER]	GO:0007623	circadian rhythm	BIOLOGICAL_PROCESS	5.44653e-05	8.35872e-06	14	0	3615	4728
[OVER]	GO:0061136	regulation of proteasomal protein catabolic process	BIOLOGICAL_PROCESS	5.44653e-05	8.35872e-06	14	0	3615	4728
[OVER]	GO:0031234	extrinsic component of cytoplasmic side of plasma membrane	CELLULAR_COMPONENT	5.44653e-05	8.35872e-06	14	0	3615	4728
[OVER]	GO:0033875	ribonucleoside bisphosphate metabolic process	BIOLOGICAL_PROCESS	5.44653e-05	8.35872e-06	14	0	3615	4728
[OVER]	GO:0033865	nucleoside bisphosphate metabolic process	BIOLOGICAL_PROCESS	5.44653e-05	8.35872e-06	14	0	3615	4728
[OVER]	GO:0031248	protein acetyltransferase complex	CELLULAR_COMPONENT	5.44653e-05	8.35872e-06	14	0	3615	4728
[OVER]	GO:0000149	SNARE binding	MOLECULAR_FUNCTION	5.44653e-05	8.35872e-06	14	0	3615	4728
[OVER]	GO:0008630	intrinsic apoptotic signaling pathway in response to DNA damage	BIOLOGICAL_PROCESS	5.44653e-05	8.35872e-06	14	0	3615	4728
[OVER]	GO:0019318	hexose metabolic process	BIOLOGICAL_PROCESS	5.44653e-05	8.35872e-06	14	0	3615	4728
[OVER]	GO:0010970	transport along microtubule	BIOLOGICAL_PROCESS	5.44653e-05	8.35872e-06	14	0	3615	4728
[OVER]	GO:0008643	carbohydrate transport	BIOLOGICAL_PROCESS	5.44653e-05	8.35872e-06	14	0	3615	4728
[OVER]	GO:0021537	telencephalon development	BIOLOGICAL_PROCESS	5.44653e-05	8.35872e-06	14	0	3615	4728
[OVER]	GO:0007281	germ cell development	BIOLOGICAL_PROCESS	5.44653e-05	8.35872e-06	14	0	3615	4728
[OVER]	GO:0034976	response to endoplasmic reticulum stress	BIOLOGICAL_PROCESS	5.44653e-05	8.35872e-06	14	0	3615	4728
[OVER]	GO:0030135	coated vesicle	CELLULAR_COMPONENT	6.03829e-05	9.28709e-06	19	2	3610	4726
[OVER]	GO:0004713	protein tyrosine kinase activity	MOLECULAR_FUNCTION	6.03829e-05	9.28709e-06	19	2	3610	4726
[OVER]	GO:0006323	DNA packaging	BIOLOGICAL_PROCESS	6.03829e-05	9.28709e-06	19	2	3610	4726
[OVER]	GO:0031406	carboxylic acid binding	MOLECULAR_FUNCTION	6.35854e-05	9.80091e-06	21	3	3608	4725
[OVER]	GO:0000075	cell cycle checkpoint	BIOLOGICAL_PROCESS	6.35854e-05	9.80091e-06	21	3	3608	4725
[OVER]	GO:0043177	organic acid binding	MOLECULAR_FUNCTION	6.35854e-05	9.80091e-06	21	3	3608	4725
[OVER]	GO:0030246	carbohydrate binding	MOLECULAR_FUNCTION	7.48774e-05	1.15498e-05	31	9	3598	4719
[OVER]	GO:0042277	peptide binding	MOLECULAR_FUNCTION	0.000101476	1.57997e-05	16	1	3613	4727
[OVER]	GO:0043434	response to peptide hormone	BIOLOGICAL_PROCESS	0.000101476	1.57997e-05	16	1	3613	4727
[OVER]	GO:0046034	ATP metabolic process	BIOLOGICAL_PROCESS	0.000101476	1.57997e-05	16	1	3613	4727
[OVER]	GO:0015085	calcium ion transmembrane transporter activity	MOLECULAR_FUNCTION	0.000101476	1.57997e-05	16	1	3613	4727
[OVER]	GO:0034708	methyltransferase complex	CELLULAR_COMPONENT	0.000101476	1.57997e-05	16	1	3613	4727
[OVER]	GO:0007033	vacuole organization	BIOLOGICAL_PROCESS	0.000101476	1.57997e-05	16	1	3613	4727
[OVER]	GO:0003678	DNA helicase activity	MOLECULAR_FUNCTION	0.000101476	1.57997e-05	16	1	3613	4727
[OVER]	GO:0016614	oxidoreductase activity, acting on CH-OH group of donors	MOLECULAR_FUNCTION	0.000101476	1.57997e-05	16	1	3613	4727
[OVER]	GO:0016616	oxidoreductase activity, acting on the CH-OH group of donors, NAD or NADP as acceptor	MOLECULAR_FUNCTION	0.000101476	1.57997e-05	16	1	3613	4727
[OVER]	GO:0005925	focal adhesion	CELLULAR_COMPONENT	0.000101476	1.57997e-05	16	1	3613	4727
[OVER]	GO:0032508	DNA duplex unwinding	BIOLOGICAL_PROCESS	0.000101476	1.57997e-05	16	1	3613	4727
[OVER]	GO:0007283	spermatogenesis	BIOLOGICAL_PROCESS	0.000101476	1.57997e-05	16	1	3613	4727
[OVER]	GO:0031032	actomyosin structure organization	BIOLOGICAL_PROCESS	0.000101476	1.57997e-05	16	1	3613	4727
[OVER]	GO:0098793	presynapse	CELLULAR_COMPONENT	0.000117674	1.83349e-05	22	4	3607	4724
[OVER]	GO:0019902	phosphatase binding	MOLECULAR_FUNCTION	0.000118206	1.92879e-05	13	0	3616	4728
[OVER]	GO:0061448	connective tissue development	BIOLOGICAL_PROCESS	0.000118206	1.92879e-05	13	0	3616	4728
[OVER]	GO:0050769	positive regulation of neurogenesis	BIOLOGICAL_PROCESS	0.000118206	1.92879e-05	13	0	3616	4728
[OVER]	GO:0006633	fatty acid biosynthetic process	BIOLOGICAL_PROCESS	0.000118206	1.92879e-05	13	0	3616	4728
[OVER]	GO:0016050	vesicle organization	BIOLOGICAL_PROCESS	0.000118206	1.92879e-05	13	0	3616	4728
[OVER]	GO:0031570	DNA integrity checkpoint	BIOLOGICAL_PROCESS	0.000118206	1.92879e-05	13	0	3616	4728
[OVER]	GO:0050731	positive regulation of peptidyl-tyrosine phosphorylation	BIOLOGICAL_PROCESS	0.000118206	1.92879e-05	13	0	3616	4728
[OVER]	GO:0097525	spliceosomal snRNP complex	CELLULAR_COMPONENT	0.000118206	1.92879e-05	13	0	3616	4728
[OVER]	GO:0090092	regulation of transmembrane receptor protein serine/threonine kinase signaling pathway	BIOLOGICAL_PROCESS	0.000118206	1.92879e-05	13	0	3616	4728
[OVER]	GO:0004177	aminopeptidase activity	MOLECULAR_FUNCTION	0.000118206	1.92879e-05	13	0	3616	4728
[OVER]	GO:0001819	positive regulation of cytokine production	BIOLOGICAL_PROCESS	0.000118206	1.92879e-05	13	0	3616	4728
[OVER]	GO:0043406	positive regulation of MAP kinase activity	BIOLOGICAL_PROCESS	0.000118206	1.92879e-05	13	0	3616	4728
[OVER]	GO:0043401	steroid hormone mediated signaling pathway	BIOLOGICAL_PROCESS	0.000118206	1.92879e-05	13	0	3616	4728
[OVER]	GO:0006476	protein deacetylation	BIOLOGICAL_PROCESS	0.000118206	1.92879e-05	13	0	3616	4728
[OVER]	GO:0030027	lamellipodium	CELLULAR_COMPONENT	0.000118206	1.92879e-05	13	0	3616	4728
[OVER]	GO:0030017	sarcomere	CELLULAR_COMPONENT	0.000118206	1.92879e-05	13	0	3616	4728
[OVER]	GO:0042054	histone methyltransferase activity	MOLECULAR_FUNCTION	0.000118206	1.92879e-05	13	0	3616	4728
[OVER]	GO:0019838	growth factor binding	MOLECULAR_FUNCTION	0.000118206	1.92879e-05	13	0	3616	4728
[OVER]	GO:0005230	extracellular ligand-gated ion channel activity	MOLECULAR_FUNCTION	0.000118206	1.92879e-05	13	0	3616	4728
[OVER]	GO:0042162	telomeric DNA binding	MOLECULAR_FUNCTION	0.000118206	1.92879e-05	13	0	3616	4728
[OVER]	GO:0000313	organellar ribosome	CELLULAR_COMPONENT	0.000118206	1.92879e-05	13	0	3616	4728
[OVER]	GO:0001659	temperature homeostasis	BIOLOGICAL_PROCESS	0.000118206	1.92879e-05	13	0	3616	4728
[OVER]	GO:0005761	mitochondrial ribosome	CELLULAR_COMPONENT	0.000118206	1.92879e-05	13	0	3616	4728
[OVER]	GO:1901617	organic hydroxy compound biosynthetic process	BIOLOGICAL_PROCESS	0.000118206	1.92879e-05	13	0	3616	4728
[OVER]	GO:1902806	regulation of cell cycle G1/S phase transition	BIOLOGICAL_PROCESS	0.000118206	1.92879e-05	13	0	3616	4728
[OVER]	GO:0071011	precatalytic spliceosome	CELLULAR_COMPONENT	0.000118206	1.92879e-05	13	0	3616	4728
[OVER]	GO:0072331	signal transduction by p53 class mediator	BIOLOGICAL_PROCESS	0.000118206	1.92879e-05	13	0	3616	4728
[OVER]	GO:0071005	U2-type precatalytic spliceosome	CELLULAR_COMPONENT	0.000118206	1.92879e-05	13	0	3616	4728
[OVER]	GO:0060348	bone development	BIOLOGICAL_PROCESS	0.000118206	1.92879e-05	13	0	3616	4728
[OVER]	GO:0009055	electron transfer activity	MOLECULAR_FUNCTION	0.000118206	1.92879e-05	13	0	3616	4728
[OVER]	GO:0003018	vascular process in circulatory system	BIOLOGICAL_PROCESS	0.000118206	1.92879e-05	13	0	3616	4728
[OVER]	GO:0016358	dendrite development	BIOLOGICAL_PROCESS	0.000118206	1.92879e-05	13	0	3616	4728
[OVER]	GO:0048705	skeletal system morphogenesis	BIOLOGICAL_PROCESS	0.000118206	1.92879e-05	13	0	3616	4728
[OVER]	GO:0048762	mesenchymal cell differentiation	BIOLOGICAL_PROCESS	0.000118206	1.92879e-05	13	0	3616	4728
[OVER]	GO:0048732	gland development	BIOLOGICAL_PROCESS	0.000118206	1.92879e-05	13	0	3616	4728
[OVER]	GO:0051261	protein depolymerization	BIOLOGICAL_PROCESS	0.000118206	1.92879e-05	13	0	3616	4728
[OVER]	GO:0007043	cell-cell junction assembly	BIOLOGICAL_PROCESS	0.000118206	1.92879e-05	13	0	3616	4728
[OVER]	GO:0045333	cellular respiration	BIOLOGICAL_PROCESS	0.000118206	1.92879e-05	13	0	3616	4728
[OVER]	GO:0007219	Notch signaling pathway	BIOLOGICAL_PROCESS	0.000118206	1.92879e-05	13	0	3616	4728
[OVER]	GO:0010833	telomere maintenance via telomere lengthening	BIOLOGICAL_PROCESS	0.000118206	1.92879e-05	13	0	3616	4728
[OVER]	GO:0034728	nucleosome organization	BIOLOGICAL_PROCESS	0.000118206	1.92879e-05	13	0	3616	4728
[OVER]	GO:1905475	regulation of protein localization to membrane	BIOLOGICAL_PROCESS	0.000118206	1.92879e-05	13	0	3616	4728
[OVER]	GO:0046777	protein autophosphorylation	BIOLOGICAL_PROCESS	0.000118206	1.92879e-05	13	0	3616	4728
[OVER]	GO:0045185	maintenance of protein location	BIOLOGICAL_PROCESS	0.000118206	1.92879e-05	13	0	3616	4728
[OVER]	GO:0014069	postsynaptic density	CELLULAR_COMPONENT	0.000118206	1.92879e-05	13	0	3616	4728
[OVER]	GO:0034451	centriolar satellite	CELLULAR_COMPONENT	0.000118206	1.92879e-05	13	0	3616	4728
[OVER]	GO:1901888	regulation of cell junction assembly	BIOLOGICAL_PROCESS	0.000118206	1.92879e-05	13	0	3616	4728
[OVER]	GO:0090734	site of DNA damage	CELLULAR_COMPONENT	0.000118206	1.92879e-05	13	0	3616	4728
[OVER]	GO:0008235	metalloexopeptidase activity	MOLECULAR_FUNCTION	0.000118206	1.92879e-05	13	0	3616	4728
[OVER]	GO:0051082	unfolded protein binding	MOLECULAR_FUNCTION	0.000118206	1.92879e-05	13	0	3616	4728
[OVER]	GO:0048015	phosphatidylinositol-mediated signaling	BIOLOGICAL_PROCESS	0.000118206	1.92879e-05	13	0	3616	4728
[OVER]	GO:0048017	inositol lipid-mediated signaling	BIOLOGICAL_PROCESS	0.000118206	1.92879e-05	13	0	3616	4728
[OVER]	GO:0007517	muscle organ development	BIOLOGICAL_PROCESS	0.000118206	1.92879e-05	13	0	3616	4728
[OVER]	GO:0007548	sex differentiation	BIOLOGICAL_PROCESS	0.000118206	1.92879e-05	13	0	3616	4728
[OVER]	GO:0031123	RNA 3'-end processing	BIOLOGICAL_PROCESS	0.000118206	1.92879e-05	13	0	3616	4728
[OVER]	GO:0002696	positive regulation of leukocyte activation	BIOLOGICAL_PROCESS	0.000118206	1.92879e-05	13	0	3616	4728
[OVER]	GO:0006333	chromatin assembly or disassembly	BIOLOGICAL_PROCESS	0.000118206	1.92879e-05	13	0	3616	4728
[OVER]	GO:1903320	regulation of protein modification by small protein conjugation or removal	BIOLOGICAL_PROCESS	0.000118206	1.92879e-05	13	0	3616	4728
[OVER]	GO:0043244	regulation of protein-containing complex disassembly	BIOLOGICAL_PROCESS	0.000118206	1.92879e-05	13	0	3616	4728
[OVER]	GO:0000118	histone deacetylase complex	CELLULAR_COMPONENT	0.000118206	1.92879e-05	13	0	3616	4728
[OVER]	GO:0009914	hormone transport	BIOLOGICAL_PROCESS	0.000118206	1.92879e-05	13	0	3616	4728
[OVER]	GO:0051494	negative regulation of cytoskeleton organization	BIOLOGICAL_PROCESS	0.000118206	1.92879e-05	13	0	3616	4728
[OVER]	GO:0046854	phosphatidylinositol phosphorylation	BIOLOGICAL_PROCESS	0.000118206	1.92879e-05	13	0	3616	4728
[OVER]	GO:0046834	lipid phosphorylation	BIOLOGICAL_PROCESS	0.000118206	1.92879e-05	13	0	3616	4728
[OVER]	GO:0032279	asymmetric synapse	CELLULAR_COMPONENT	0.000118206	1.92879e-05	13	0	3616	4728
[OVER]	GO:0051539	4 iron, 4 sulfur cluster binding	MOLECULAR_FUNCTION	0.000118206	1.92879e-05	13	0	3616	4728
[OVER]	GO:0048232	male gamete generation	BIOLOGICAL_PROCESS	0.000118882	1.94777e-05	18	2	3611	4726
[OVER]	GO:0005201	extracellular matrix structural constituent	MOLECULAR_FUNCTION	0.000118882	1.94777e-05	18	2	3611	4726
[OVER]	GO:0030133	transport vesicle	CELLULAR_COMPONENT	0.000118882	1.94777e-05	18	2	3611	4726
[OVER]	GO:0031461	cullin-RING ubiquitin ligase complex	CELLULAR_COMPONENT	0.000118882	1.94777e-05	18	2	3611	4726
[OVER]	GO:0006875	cellular metal ion homeostasis	BIOLOGICAL_PROCESS	0.000118882	1.94777e-05	18	2	3611	4726
[OVER]	GO:0004620	phospholipase activity	MOLECULAR_FUNCTION	0.000118882	1.94777e-05	18	2	3611	4726
[OVER]	GO:0051783	regulation of nuclear division	BIOLOGICAL_PROCESS	0.000121323	1.99047e-05	20	3	3609	4725
[OVER]	GO:0045930	negative regulation of mitotic cell cycle	BIOLOGICAL_PROCESS	0.000121323	1.99047e-05	20	3	3609	4725
[OVER]	GO:0000070	mitotic sister chromatid segregation	BIOLOGICAL_PROCESS	0.000185615	3.04734e-05	23	5	3606	4723
[OVER]	GO:0006665	sphingolipid metabolic process	BIOLOGICAL_PROCESS	0.000207775	3.44128e-05	15	1	3614	4727
[OVER]	GO:0016054	organic acid catabolic process	BIOLOGICAL_PROCESS	0.000207775	3.44128e-05	15	1	3614	4727
[OVER]	GO:0043543	protein acylation	BIOLOGICAL_PROCESS	0.000207775	3.44128e-05	15	1	3614	4727
[OVER]	GO:0050890	cognition	BIOLOGICAL_PROCESS	0.000207775	3.44128e-05	15	1	3614	4727
[OVER]	GO:0098802	plasma membrane signaling receptor complex	CELLULAR_COMPONENT	0.000207775	3.44128e-05	15	1	3614	4727
[OVER]	GO:0000502	proteasome complex	CELLULAR_COMPONENT	0.000207775	3.44128e-05	15	1	3614	4727
[OVER]	GO:0005249	voltage-gated potassium channel activity	MOLECULAR_FUNCTION	0.000207775	3.44128e-05	15	1	3614	4727
[OVER]	GO:0016459	myosin complex	CELLULAR_COMPONENT	0.000207775	3.44128e-05	15	1	3614	4727
[OVER]	GO:0071375	cellular response to peptide hormone stimulus	BIOLOGICAL_PROCESS	0.000207775	3.44128e-05	15	1	3614	4727
[OVER]	GO:0046395	carboxylic acid catabolic process	BIOLOGICAL_PROCESS	0.000207775	3.44128e-05	15	1	3614	4727
[OVER]	GO:0035303	regulation of dephosphorylation	BIOLOGICAL_PROCESS	0.000207775	3.44128e-05	15	1	3614	4727
[OVER]	GO:1905369	endopeptidase complex	CELLULAR_COMPONENT	0.000207775	3.44128e-05	15	1	3614	4727
[OVER]	GO:0051651	maintenance of location in cell	BIOLOGICAL_PROCESS	0.000207775	3.44128e-05	15	1	3614	4727
[OVER]	GO:0016032	viral process	BIOLOGICAL_PROCESS	0.000217552	3.60565e-05	21	4	3608	4724
[OVER]	GO:0005539	glycosaminoglycan binding	MOLECULAR_FUNCTION	0.000241828	4.01878e-05	19	3	3610	4725
[OVER]	GO:0000793	condensed chromosome	CELLULAR_COMPONENT	0.000241828	4.01878e-05	19	3	3610	4725
[OVER]	GO:0046578	regulation of Ras protein signal transduction	BIOLOGICAL_PROCESS	0.000241828	4.01878e-05	19	3	3610	4725
[OVER]	GO:0010948	negative regulation of cell cycle process	BIOLOGICAL_PROCESS	0.000241828	4.01878e-05	19	3	3610	4725
[OVER]	GO:0000910	cytokinesis	BIOLOGICAL_PROCESS	0.000243936	4.06469e-05	17	2	3612	4726
[OVER]	GO:0042626	ATPase-coupled transmembrane transporter activity	MOLECULAR_FUNCTION	0.000243936	4.06469e-05	17	2	3612	4726
[OVER]	GO:0019199	transmembrane receptor protein kinase activity	MOLECULAR_FUNCTION	0.000243936	4.06469e-05	17	2	3612	4726
[OVER]	GO:0015399	primary active transmembrane transporter activity	MOLECULAR_FUNCTION	0.000243936	4.06469e-05	17	2	3612	4726
[OVER]	GO:1902554	serine/threonine protein kinase complex	CELLULAR_COMPONENT	0.000255272	4.45004e-05	12	0	3617	4728
[OVER]	GO:0030308	negative regulation of cell growth	BIOLOGICAL_PROCESS	0.000255272	4.45004e-05	12	0	3617	4728
[OVER]	GO:0006672	ceramide metabolic process	BIOLOGICAL_PROCESS	0.000255272	4.45004e-05	12	0	3617	4728
[OVER]	GO:1901264	carbohydrate derivative transport	BIOLOGICAL_PROCESS	0.000255272	4.45004e-05	12	0	3617	4728
[OVER]	GO:0031668	cellular response to extracellular stimulus	BIOLOGICAL_PROCESS	0.000255272	4.45004e-05	12	0	3617	4728
[OVER]	GO:0030336	negative regulation of cell migration	BIOLOGICAL_PROCESS	0.000255272	4.45004e-05	12	0	3617	4728
[OVER]	GO:0098754	detoxification	BIOLOGICAL_PROCESS	0.000255272	4.45004e-05	12	0	3617	4728
[OVER]	GO:0050727	regulation of inflammatory response	BIOLOGICAL_PROCESS	0.000255272	4.45004e-05	12	0	3617	4728
[OVER]	GO:1903828	negative regulation of cellular protein localization	BIOLOGICAL_PROCESS	0.000255272	4.45004e-05	12	0	3617	4728
[OVER]	GO:0098852	lytic vacuole membrane	CELLULAR_COMPONENT	0.000255272	4.45004e-05	12	0	3617	4728
[OVER]	GO:1901136	carbohydrate derivative catabolic process	BIOLOGICAL_PROCESS	0.000255272	4.45004e-05	12	0	3617	4728
[OVER]	GO:2000045	regulation of G1/S transition of mitotic cell cycle	BIOLOGICAL_PROCESS	0.000255272	4.45004e-05	12	0	3617	4728
[OVER]	GO:0042445	hormone metabolic process	BIOLOGICAL_PROCESS	0.000255272	4.45004e-05	12	0	3617	4728
[OVER]	GO:0006400	tRNA modification	BIOLOGICAL_PROCESS	0.000255272	4.45004e-05	12	0	3617	4728
[OVER]	GO:0043409	negative regulation of MAPK cascade	BIOLOGICAL_PROCESS	0.000255272	4.45004e-05	12	0	3617	4728
[OVER]	GO:0097237	cellular response to toxic substance	BIOLOGICAL_PROCESS	0.000255272	4.45004e-05	12	0	3617	4728
[OVER]	GO:0120161	regulation of cold-induced thermogenesis	BIOLOGICAL_PROCESS	0.000255272	4.45004e-05	12	0	3617	4728
[OVER]	GO:0030010	establishment of cell polarity	BIOLOGICAL_PROCESS	0.000255272	4.45004e-05	12	0	3617	4728
[OVER]	GO:0001522	pseudouridine synthesis	BIOLOGICAL_PROCESS	0.000255272	4.45004e-05	12	0	3617	4728
[OVER]	GO:1990845	adaptive thermogenesis	BIOLOGICAL_PROCESS	0.000255272	4.45004e-05	12	0	3617	4728
[OVER]	GO:0050678	regulation of epithelial cell proliferation	BIOLOGICAL_PROCESS	0.000255272	4.45004e-05	12	0	3617	4728
[OVER]	GO:1903532	positive regulation of secretion by cell	BIOLOGICAL_PROCESS	0.000255272	4.45004e-05	12	0	3617	4728
[OVER]	GO:0030218	erythrocyte differentiation	BIOLOGICAL_PROCESS	0.000255272	4.45004e-05	12	0	3617	4728
[OVER]	GO:0030178	negative regulation of Wnt signaling pathway	BIOLOGICAL_PROCESS	0.000255272	4.45004e-05	12	0	3617	4728
[OVER]	GO:0042180	cellular ketone metabolic process	BIOLOGICAL_PROCESS	0.000255272	4.45004e-05	12	0	3617	4728
[OVER]	GO:1990748	cellular detoxification	BIOLOGICAL_PROCESS	0.000255272	4.45004e-05	12	0	3617	4728
[OVER]	GO:0005765	lysosomal membrane	CELLULAR_COMPONENT	0.000255272	4.45004e-05	12	0	3617	4728
[OVER]	GO:0072593	reactive oxygen species metabolic process	BIOLOGICAL_PROCESS	0.000255272	4.45004e-05	12	0	3617	4728
[OVER]	GO:2001022	positive regulation of response to DNA damage stimulus	BIOLOGICAL_PROCESS	0.000255272	4.45004e-05	12	0	3617	4728
[OVER]	GO:0009247	glycolipid biosynthetic process	BIOLOGICAL_PROCESS	0.000255272	4.45004e-05	12	0	3617	4728
[OVER]	GO:0005884	actin filament	CELLULAR_COMPONENT	0.000255272	4.45004e-05	12	0	3617	4728
[OVER]	GO:0034399	nuclear periphery	CELLULAR_COMPONENT	0.000255272	4.45004e-05	12	0	3617	4728
[OVER]	GO:0016592	mediator complex	CELLULAR_COMPONENT	0.000255272	4.45004e-05	12	0	3617	4728
[OVER]	GO:0005507	copper ion binding	MOLECULAR_FUNCTION	0.000255272	4.45004e-05	12	0	3617	4728
[OVER]	GO:0106106	cold-induced thermogenesis	BIOLOGICAL_PROCESS	0.000255272	4.45004e-05	12	0	3617	4728
[OVER]	GO:0005604	basement membrane	CELLULAR_COMPONENT	0.000255272	4.45004e-05	12	0	3617	4728
[OVER]	GO:0005669	transcription factor TFIID complex	CELLULAR_COMPONENT	0.000255272	4.45004e-05	12	0	3617	4728
[OVER]	GO:0030660	Golgi-associated vesicle membrane	CELLULAR_COMPONENT	0.000255272	4.45004e-05	12	0	3617	4728
[OVER]	GO:0034101	erythrocyte homeostasis	BIOLOGICAL_PROCESS	0.000255272	4.45004e-05	12	0	3617	4728
[OVER]	GO:0090257	regulation of muscle system process	BIOLOGICAL_PROCESS	0.000255272	4.45004e-05	12	0	3617	4728
[OVER]	GO:0016866	intramolecular transferase activity	MOLECULAR_FUNCTION	0.000255272	4.45004e-05	12	0	3617	4728
[OVER]	GO:0002262	myeloid cell homeostasis	BIOLOGICAL_PROCESS	0.000255272	4.45004e-05	12	0	3617	4728
[OVER]	GO:0008406	gonad development	BIOLOGICAL_PROCESS	0.000255272	4.45004e-05	12	0	3617	4728
[OVER]	GO:0007052	mitotic spindle organization	BIOLOGICAL_PROCESS	0.000255272	4.45004e-05	12	0	3617	4728
[OVER]	GO:0007030	Golgi organization	BIOLOGICAL_PROCESS	0.000255272	4.45004e-05	12	0	3617	4728
[OVER]	GO:0016835	carbon-oxygen lyase activity	MOLECULAR_FUNCTION	0.000255272	4.45004e-05	12	0	3617	4728
[OVER]	GO:0016811	hydrolase activity, acting on carbon-nitrogen (but not peptide) bonds, in linear amides	MOLECULAR_FUNCTION	0.000255272	4.45004e-05	12	0	3617	4728
[OVER]	GO:0003697	single-stranded DNA binding	MOLECULAR_FUNCTION	0.000255272	4.45004e-05	12	0	3617	4728
[OVER]	GO:0007224	smoothened signaling pathway	BIOLOGICAL_PROCESS	0.000255272	4.45004e-05	12	0	3617	4728
[OVER]	GO:0045137	development of primary sexual characteristics	BIOLOGICAL_PROCESS	0.000255272	4.45004e-05	12	0	3617	4728
[OVER]	GO:0016763	transferase activity, transferring pentosyl groups	MOLECULAR_FUNCTION	0.000255272	4.45004e-05	12	0	3617	4728
[OVER]	GO:0002183	cytoplasmic translational initiation	BIOLOGICAL_PROCESS	0.000255272	4.45004e-05	12	0	3617	4728
[OVER]	GO:0008217	regulation of blood pressure	BIOLOGICAL_PROCESS	0.000255272	4.45004e-05	12	0	3617	4728
[OVER]	GO:0051047	positive regulation of secretion	BIOLOGICAL_PROCESS	0.000255272	4.45004e-05	12	0	3617	4728
[OVER]	GO:0004722	protein serine/threonine phosphatase activity	MOLECULAR_FUNCTION	0.000255272	4.45004e-05	12	0	3617	4728
[OVER]	GO:0000077	DNA damage checkpoint	BIOLOGICAL_PROCESS	0.000255272	4.45004e-05	12	0	3617	4728
[OVER]	GO:0061041	regulation of wound healing	BIOLOGICAL_PROCESS	0.000255272	4.45004e-05	12	0	3617	4728
[OVER]	GO:0061025	membrane fusion	BIOLOGICAL_PROCESS	0.000255272	4.45004e-05	12	0	3617	4728
[OVER]	GO:0007568	aging	BIOLOGICAL_PROCESS	0.000255272	4.45004e-05	12	0	3617	4728
[OVER]	GO:0045926	negative regulation of growth	BIOLOGICAL_PROCESS	0.000255272	4.45004e-05	12	0	3617	4728
[OVER]	GO:0097060	synaptic membrane	CELLULAR_COMPONENT	0.000255272	4.45004e-05	12	0	3617	4728
[OVER]	GO:0000123	histone acetyltransferase complex	CELLULAR_COMPONENT	0.000255272	4.45004e-05	12	0	3617	4728
[OVER]	GO:0046879	hormone secretion	BIOLOGICAL_PROCESS	0.000255272	4.45004e-05	12	0	3617	4728
[OVER]	GO:0032273	positive regulation of protein polymerization	BIOLOGICAL_PROCESS	0.000255272	4.45004e-05	12	0	3617	4728
[OVER]	GO:0021700	developmental maturation	BIOLOGICAL_PROCESS	0.000255272	4.45004e-05	12	0	3617	4728
[OVER]	GO:0043021	ribonucleoprotein complex binding	MOLECULAR_FUNCTION	0.000255272	4.45004e-05	12	0	3617	4728
[OVER]	GO:0043039	tRNA aminoacylation	BIOLOGICAL_PROCESS	0.000255272	4.45004e-05	12	0	3617	4728
[OVER]	GO:0002573	myeloid leukocyte differentiation	BIOLOGICAL_PROCESS	0.000255272	4.45004e-05	12	0	3617	4728
[OVER]	GO:0043038	amino acid activation	BIOLOGICAL_PROCESS	0.000255272	4.45004e-05	12	0	3617	4728
[OVER]	GO:0035097	histone methyltransferase complex	CELLULAR_COMPONENT	0.000426459	7.46754e-05	14	1	3615	4727
[OVER]	GO:0031532	actin cytoskeleton reorganization	BIOLOGICAL_PROCESS	0.000426459	7.46754e-05	14	1	3615	4727
[OVER]	GO:0016410	N-acyltransferase activity	MOLECULAR_FUNCTION	0.000426459	7.46754e-05	14	1	3615	4727
[OVER]	GO:1902600	proton transmembrane transport	BIOLOGICAL_PROCESS	0.000426459	7.46754e-05	14	1	3615	4727
[OVER]	GO:0051146	striated muscle cell differentiation	BIOLOGICAL_PROCESS	0.000426459	7.46754e-05	14	1	3615	4727
[OVER]	GO:0051090	regulation of DNA-binding transcription factor activity	BIOLOGICAL_PROCESS	0.000426459	7.46754e-05	14	1	3615	4727
[OVER]	GO:0003746	translation elongation factor activity	MOLECULAR_FUNCTION	0.000426459	7.46754e-05	14	1	3615	4727
[OVER]	GO:0005319	lipid transporter activity	MOLECULAR_FUNCTION	0.000459245	8.06213e-05	18	3	3611	4725
[OVER]	GO:0048475	coated membrane	CELLULAR_COMPONENT	0.000459245	8.06213e-05	18	3	3611	4725
[OVER]	GO:0030117	membrane coat	CELLULAR_COMPONENT	0.000459245	8.06213e-05	18	3	3611	4725
[OVER]	GO:0044262	cellular carbohydrate metabolic process	BIOLOGICAL_PROCESS	0.000459245	8.06213e-05	18	3	3611	4725
[OVER]	GO:0012506	vesicle membrane	CELLULAR_COMPONENT	0.000479921	8.43582e-05	16	2	3613	4726
[OVER]	GO:0045111	intermediate filament cytoskeleton	CELLULAR_COMPONENT	0.000479921	8.43582e-05	16	2	3613	4726
[OVER]	GO:0035150	regulation of tube size	BIOLOGICAL_PROCESS	0.000554118	0.000102653	11	0	3618	4728
[OVER]	GO:0019905	syntaxin binding	MOLECULAR_FUNCTION	0.000554118	0.000102653	11	0	3618	4728
[OVER]	GO:0006612	protein targeting to membrane	BIOLOGICAL_PROCESS	0.000554118	0.000102653	11	0	3618	4728
[OVER]	GO:0098727	maintenance of cell number	BIOLOGICAL_PROCESS	0.000554118	0.000102653	11	0	3618	4728
[OVER]	GO:0097447	dendritic tree	CELLULAR_COMPONENT	0.000554118	0.000102653	11	0	3618	4728
[OVER]	GO:0031669	cellular response to nutrient levels	BIOLOGICAL_PROCESS	0.000554118	0.000102653	11	0	3618	4728
[OVER]	GO:0043542	endothelial cell migration	BIOLOGICAL_PROCESS	0.000554118	0.000102653	11	0	3618	4728
[OVER]	GO:0098858	actin-based cell projection	CELLULAR_COMPONENT	0.000554118	0.000102653	11	0	3618	4728
[OVER]	GO:0098869	cellular oxidant detoxification	BIOLOGICAL_PROCESS	0.000554118	0.000102653	11	0	3618	4728
[OVER]	GO:2000058	regulation of ubiquitin-dependent protein catabolic process	BIOLOGICAL_PROCESS	0.000554118	0.000102653	11	0	3618	4728
[OVER]	GO:0035296	regulation of tube diameter	BIOLOGICAL_PROCESS	0.000554118	0.000102653	11	0	3618	4728
[OVER]	GO:0048592	eye morphogenesis	BIOLOGICAL_PROCESS	0.000554118	0.000102653	11	0	3618	4728
[OVER]	GO:0030425	dendrite	CELLULAR_COMPONENT	0.000554118	0.000102653	11	0	3618	4728
[OVER]	GO:1903708	positive regulation of hemopoiesis	BIOLOGICAL_PROCESS	0.000554118	0.000102653	11	0	3618	4728
[OVER]	GO:0150115	cell-substrate junction organization	BIOLOGICAL_PROCESS	0.000554118	0.000102653	11	0	3618	4728
[OVER]	GO:0006418	tRNA aminoacylation for protein translation	BIOLOGICAL_PROCESS	0.000554118	0.000102653	11	0	3618	4728
[OVER]	GO:0006497	protein lipidation	BIOLOGICAL_PROCESS	0.000554118	0.000102653	11	0	3618	4728
[OVER]	GO:0006469	negative regulation of protein kinase activity	BIOLOGICAL_PROCESS	0.000554118	0.000102653	11	0	3618	4728
[OVER]	GO:0030072	peptide hormone secretion	BIOLOGICAL_PROCESS	0.000554118	0.000102653	11	0	3618	4728
[OVER]	GO:0001510	RNA methylation	BIOLOGICAL_PROCESS	0.000554118	0.000102653	11	0	3618	4728
[OVER]	GO:0019827	stem cell population maintenance	BIOLOGICAL_PROCESS	0.000554118	0.000102653	11	0	3618	4728
[OVER]	GO:0044839	cell cycle G2/M phase transition	BIOLOGICAL_PROCESS	0.000554118	0.000102653	11	0	3618	4728
[OVER]	GO:1902275	regulation of chromatin organization	BIOLOGICAL_PROCESS	0.000554118	0.000102653	11	0	3618	4728
[OVER]	GO:0031519	PcG protein complex	CELLULAR_COMPONENT	0.000554118	0.000102653	11	0	3618	4728
[OVER]	GO:0042158	lipoprotein biosynthetic process	BIOLOGICAL_PROCESS	0.000554118	0.000102653	11	0	3618	4728
[OVER]	GO:0030170	pyridoxal phosphate binding	MOLECULAR_FUNCTION	0.000554118	0.000102653	11	0	3618	4728
[OVER]	GO:0042113	B cell activation	BIOLOGICAL_PROCESS	0.000554118	0.000102653	11	0	3618	4728
[OVER]	GO:0031497	chromatin assembly	BIOLOGICAL_PROCESS	0.000554118	0.000102653	11	0	3618	4728
[OVER]	GO:0043462	regulation of ATPase activity	BIOLOGICAL_PROCESS	0.000554118	0.000102653	11	0	3618	4728
[OVER]	GO:0005770	late endosome	CELLULAR_COMPONENT	0.000554118	0.000102653	11	0	3618	4728
[OVER]	GO:0090316	positive regulation of intracellular protein transport	BIOLOGICAL_PROCESS	0.000554118	0.000102653	11	0	3618	4728
[OVER]	GO:0035591	signaling adaptor activity	MOLECULAR_FUNCTION	0.000554118	0.000102653	11	0	3618	4728
[OVER]	GO:0048863	stem cell differentiation	BIOLOGICAL_PROCESS	0.000554118	0.000102653	11	0	3618	4728
[OVER]	GO:0005891	voltage-gated calcium channel complex	CELLULAR_COMPONENT	0.000554118	0.000102653	11	0	3618	4728
[OVER]	GO:2001242	regulation of intrinsic apoptotic signaling pathway	BIOLOGICAL_PROCESS	0.000554118	0.000102653	11	0	3618	4728
[OVER]	GO:0061640	cytoskeleton-dependent cytokinesis	BIOLOGICAL_PROCESS	0.000554118	0.000102653	11	0	3618	4728
[OVER]	GO:0016278	lysine N-methyltransferase activity	MOLECULAR_FUNCTION	0.000554118	0.000102653	11	0	3618	4728
[OVER]	GO:0016279	protein-lysine N-methyltransferase activity	MOLECULAR_FUNCTION	0.000554118	0.000102653	11	0	3618	4728
[OVER]	GO:0001952	regulation of cell-matrix adhesion	BIOLOGICAL_PROCESS	0.000554118	0.000102653	11	0	3618	4728
[OVER]	GO:0050905	neuromuscular process	BIOLOGICAL_PROCESS	0.000554118	0.000102653	11	0	3618	4728
[OVER]	GO:0006937	regulation of muscle contraction	BIOLOGICAL_PROCESS	0.000554118	0.000102653	11	0	3618	4728
[OVER]	GO:0097746	regulation of blood vessel diameter	BIOLOGICAL_PROCESS	0.000554118	0.000102653	11	0	3618	4728
[OVER]	GO:0006909	phagocytosis	BIOLOGICAL_PROCESS	0.000554118	0.000102653	11	0	3618	4728
[OVER]	GO:0002253	activation of immune response	BIOLOGICAL_PROCESS	0.000554118	0.000102653	11	0	3618	4728
[OVER]	GO:1903036	positive regulation of response to wounding	BIOLOGICAL_PROCESS	0.000554118	0.000102653	11	0	3618	4728
[OVER]	GO:0034704	calcium channel complex	CELLULAR_COMPONENT	0.000554118	0.000102653	11	0	3618	4728
[OVER]	GO:0007009	plasma membrane organization	BIOLOGICAL_PROCESS	0.000554118	0.000102653	11	0	3618	4728
[OVER]	GO:0032008	positive regulation of TOR signaling	BIOLOGICAL_PROCESS	0.000554118	0.000102653	11	0	3618	4728
[OVER]	GO:0034644	cellular response to UV	BIOLOGICAL_PROCESS	0.000554118	0.000102653	11	0	3618	4728
[OVER]	GO:0032092	positive regulation of protein binding	BIOLOGICAL_PROCESS	0.000554118	0.000102653	11	0	3618	4728
[OVER]	GO:0004843	thiol-dependent ubiquitin-specific protease activity	MOLECULAR_FUNCTION	0.000554118	0.000102653	11	0	3618	4728
[OVER]	GO:0070491	repressing transcription factor binding	MOLECULAR_FUNCTION	0.000554118	0.000102653	11	0	3618	4728
[OVER]	GO:0062012	regulation of small molecule metabolic process	BIOLOGICAL_PROCESS	0.000554118	0.000102653	11	0	3618	4728
[OVER]	GO:0009881	photoreceptor activity	MOLECULAR_FUNCTION	0.000554118	0.000102653	11	0	3618	4728
[OVER]	GO:0070160	tight junction	CELLULAR_COMPONENT	0.000554118	0.000102653	11	0	3618	4728
[OVER]	GO:0016627	oxidoreductase activity, acting on the CH-CH group of donors	MOLECULAR_FUNCTION	0.000554118	0.000102653	11	0	3618	4728
[OVER]	GO:0002064	epithelial cell development	BIOLOGICAL_PROCESS	0.000554118	0.000102653	11	0	3618	4728
[OVER]	GO:1904062	regulation of cation transmembrane transport	BIOLOGICAL_PROCESS	0.000554118	0.000102653	11	0	3618	4728
[OVER]	GO:0008173	RNA methyltransferase activity	MOLECULAR_FUNCTION	0.000554118	0.000102653	11	0	3618	4728
[OVER]	GO:0005923	bicellular tight junction	CELLULAR_COMPONENT	0.000554118	0.000102653	11	0	3618	4728
[OVER]	GO:0070279	vitamin B6 binding	MOLECULAR_FUNCTION	0.000554118	0.000102653	11	0	3618	4728
[OVER]	GO:0009612	response to mechanical stimulus	BIOLOGICAL_PROCESS	0.000554118	0.000102653	11	0	3618	4728
[OVER]	GO:0051101	regulation of DNA binding	BIOLOGICAL_PROCESS	0.000554118	0.000102653	11	0	3618	4728
[OVER]	GO:0051100	negative regulation of binding	BIOLOGICAL_PROCESS	0.000554118	0.000102653	11	0	3618	4728
[OVER]	GO:0051048	negative regulation of secretion	BIOLOGICAL_PROCESS	0.000554118	0.000102653	11	0	3618	4728
[OVER]	GO:0045211	postsynaptic membrane	CELLULAR_COMPONENT	0.000554118	0.000102653	11	0	3618	4728
[OVER]	GO:0016706	2-oxoglutarate-dependent dioxygenase activity	MOLECULAR_FUNCTION	0.000554118	0.000102653	11	0	3618	4728
[OVER]	GO:0002697	regulation of immune effector process	BIOLOGICAL_PROCESS	0.000554118	0.000102653	11	0	3618	4728
[OVER]	GO:0032507	maintenance of protein location in cell	BIOLOGICAL_PROCESS	0.000554118	0.000102653	11	0	3618	4728
[OVER]	GO:0018210	peptidyl-threonine modification	BIOLOGICAL_PROCESS	0.000554118	0.000102653	11	0	3618	4728
[OVER]	GO:0032421	stereocilium bundle	CELLULAR_COMPONENT	0.000554118	0.000102653	11	0	3618	4728
[OVER]	GO:0015934	large ribosomal subunit	CELLULAR_COMPONENT	0.000554118	0.000102653	11	0	3618	4728
[OVER]	GO:0006304	DNA modification	BIOLOGICAL_PROCESS	0.000554118	0.000102653	11	0	3618	4728
[OVER]	GO:0006367	transcription initiation from RNA polymerase II promoter	BIOLOGICAL_PROCESS	0.000554118	0.000102653	11	0	3618	4728
[OVER]	GO:0017022	myosin binding	MOLECULAR_FUNCTION	0.000554118	0.000102653	11	0	3618	4728
[OVER]	GO:0014706	striated muscle tissue development	BIOLOGICAL_PROCESS	0.000554118	0.000102653	11	0	3618	4728
[OVER]	GO:0043270	positive regulation of ion transport	BIOLOGICAL_PROCESS	0.000554118	0.000102653	11	0	3618	4728
[OVER]	GO:0009952	anterior/posterior pattern specification	BIOLOGICAL_PROCESS	0.000554118	0.000102653	11	0	3618	4728
[OVER]	GO:0046883	regulation of hormone secretion	BIOLOGICAL_PROCESS	0.000554118	0.000102653	11	0	3618	4728
[OVER]	GO:0015718	monocarboxylic acid transport	BIOLOGICAL_PROCESS	0.000554118	0.000102653	11	0	3618	4728
[OVER]	GO:0045665	negative regulation of neuron differentiation	BIOLOGICAL_PROCESS	0.000554118	0.000102653	11	0	3618	4728
[OVER]	GO:0006022	aminoglycan metabolic process	BIOLOGICAL_PROCESS	0.000554118	0.000102653	11	0	3618	4728
[OVER]	GO:0033673	negative regulation of kinase activity	BIOLOGICAL_PROCESS	0.000554118	0.000102653	11	0	3618	4728
[OVER]	GO:0045637	regulation of myeloid cell differentiation	BIOLOGICAL_PROCESS	0.000554118	0.000102653	11	0	3618	4728
[OVER]	GO:0015850	organic hydroxy compound transport	BIOLOGICAL_PROCESS	0.000554118	0.000102653	11	0	3618	4728
[OVER]	GO:0070997	neuron death	BIOLOGICAL_PROCESS	0.00086223	0.000161368	13	1	3616	4727
[OVER]	GO:0005178	integrin binding	MOLECULAR_FUNCTION	0.00086223	0.000161368	13	1	3616	4727
[OVER]	GO:0042157	lipoprotein metabolic process	BIOLOGICAL_PROCESS	0.00086223	0.000161368	13	1	3616	4727
[OVER]	GO:0016407	acetyltransferase activity	MOLECULAR_FUNCTION	0.00086223	0.000161368	13	1	3616	4727
[OVER]	GO:0006898	receptor-mediated endocytosis	BIOLOGICAL_PROCESS	0.00086223	0.000161368	13	1	3616	4727
[OVER]	GO:0035304	regulation of protein dephosphorylation	BIOLOGICAL_PROCESS	0.00086223	0.000161368	13	1	3616	4727
[OVER]	GO:0010001	glial cell differentiation	BIOLOGICAL_PROCESS	0.00086223	0.000161368	13	1	3616	4727
[OVER]	GO:0035335	peptidyl-tyrosine dephosphorylation	BIOLOGICAL_PROCESS	0.00086223	0.000161368	13	1	3616	4727
[OVER]	GO:0004896	cytokine receptor activity	MOLECULAR_FUNCTION	0.00086223	0.000161368	13	1	3616	4727
[OVER]	GO:0007088	regulation of mitotic nuclear division	BIOLOGICAL_PROCESS	0.00086223	0.000160606	17	3	3612	4725
[OVER]	GO:0008544	epidermis development	BIOLOGICAL_PROCESS	0.00086223	0.000161368	13	1	3616	4727
[OVER]	GO:1901988	negative regulation of cell cycle phase transition	BIOLOGICAL_PROCESS	0.00086223	0.000160606	17	3	3612	4725
[OVER]	GO:0022406	membrane docking	BIOLOGICAL_PROCESS	0.00086223	0.000160606	17	3	3612	4725
[OVER]	GO:0004714	transmembrane receptor protein tyrosine kinase activity	MOLECULAR_FUNCTION	0.00086223	0.000161368	13	1	3616	4727
[OVER]	GO:0004725	protein tyrosine phosphatase activity	MOLECULAR_FUNCTION	0.00086223	0.000161368	13	1	3616	4727
[OVER]	GO:0140375	immune receptor activity	MOLECULAR_FUNCTION	0.00086223	0.000161368	13	1	3616	4727
[OVER]	GO:0007611	learning or memory	BIOLOGICAL_PROCESS	0.00086223	0.000161368	13	1	3616	4727
[OVER]	GO:0030659	cytoplasmic vesicle membrane	CELLULAR_COMPONENT	0.000928131	0.000174012	15	2	3614	4726
[OVER]	GO:0015980	energy derivation by oxidation of organic compounds	BIOLOGICAL_PROCESS	0.000928131	0.000174012	15	2	3614	4726
[OVER]	GO:0006338	chromatin remodeling	BIOLOGICAL_PROCESS	0.000928131	0.000174012	15	2	3614	4726
[OVER]	GO:0090501	RNA phosphodiester bond hydrolysis	BIOLOGICAL_PROCESS	0.00110818	0.000207893	20	5	3609	4723
[OVER]	GO:0019915	lipid storage	BIOLOGICAL_PROCESS	0.00118726	0.000236764	10	0	3619	4728
[OVER]	GO:2000116	regulation of cysteine-type endopeptidase activity	BIOLOGICAL_PROCESS	0.00118726	0.000236764	10	0	3619	4728
[OVER]	GO:0098781	ncRNA transcription	BIOLOGICAL_PROCESS	0.00118726	0.000236764	10	0	3619	4728
[OVER]	GO:0016051	carbohydrate biosynthetic process	BIOLOGICAL_PROCESS	0.00118726	0.000236764	10	0	3619	4728
[OVER]	GO:0001750	photoreceptor outer segment	CELLULAR_COMPONENT	0.00118726	0.000236764	10	0	3619	4728
[OVER]	GO:0001726	ruffle	CELLULAR_COMPONENT	0.00118726	0.000236764	10	0	3619	4728
[OVER]	GO:0001764	neuron migration	BIOLOGICAL_PROCESS	0.00118726	0.000236764	10	0	3619	4728
[OVER]	GO:0097526	spliceosomal tri-snRNP complex	CELLULAR_COMPONENT	0.00118726	0.000236764	10	0	3619	4728
[OVER]	GO:0097529	myeloid leukocyte migration	BIOLOGICAL_PROCESS	0.00118726	0.000236764	10	0	3619	4728
[OVER]	GO:0004181	metallocarboxypeptidase activity	MOLECULAR_FUNCTION	0.00118726	0.000236764	10	0	3619	4728
[OVER]	GO:0061515	myeloid cell development	BIOLOGICAL_PROCESS	0.00118726	0.000236764	10	0	3619	4728
[OVER]	GO:0050818	regulation of coagulation	BIOLOGICAL_PROCESS	0.00118726	0.000236764	10	0	3619	4728
[OVER]	GO:0150116	regulation of cell-substrate junction organization	BIOLOGICAL_PROCESS	0.00118726	0.000236764	10	0	3619	4728
[OVER]	GO:0050821	protein stabilization	BIOLOGICAL_PROCESS	0.00118726	0.000236764	10	0	3619	4728
[OVER]	GO:0017148	negative regulation of translation	BIOLOGICAL_PROCESS	0.00118726	0.000236764	10	0	3619	4728
[OVER]	GO:0031333	negative regulation of protein-containing complex assembly	BIOLOGICAL_PROCESS	0.00118726	0.000236764	10	0	3619	4728
[OVER]	GO:0030073	insulin secretion	BIOLOGICAL_PROCESS	0.00118726	0.000236764	10	0	3619	4728
[OVER]	GO:0045995	regulation of embryonic development	BIOLOGICAL_PROCESS	0.00118726	0.000236764	10	0	3619	4728
[OVER]	GO:1990823	response to leukemia inhibitory factor	BIOLOGICAL_PROCESS	0.00118726	0.000236764	10	0	3619	4728
[OVER]	GO:1990830	cellular response to leukemia inhibitory factor	BIOLOGICAL_PROCESS	0.00118726	0.000236764	10	0	3619	4728
[OVER]	GO:1903522	regulation of blood circulation	BIOLOGICAL_PROCESS	0.00118726	0.000236764	10	0	3619	4728
[OVER]	GO:1903531	negative regulation of secretion by cell	BIOLOGICAL_PROCESS	0.00118726	0.000236764	10	0	3619	4728
[OVER]	GO:0005200	structural constituent of cytoskeleton	MOLECULAR_FUNCTION	0.00118726	0.000236764	10	0	3619	4728
[OVER]	GO:0006513	protein monoubiquitination	BIOLOGICAL_PROCESS	0.00118726	0.000236764	10	0	3619	4728
[OVER]	GO:0005245	voltage-gated calcium channel activity	MOLECULAR_FUNCTION	0.00118726	0.000236764	10	0	3619	4728
[OVER]	GO:0120034	positive regulation of plasma membrane bounded cell projection assembly	BIOLOGICAL_PROCESS	0.00118726	0.000236764	10	0	3619	4728
[OVER]	GO:0030217	T cell differentiation	BIOLOGICAL_PROCESS	0.00118726	0.000236764	10	0	3619	4728
[OVER]	GO:0030203	glycosaminoglycan metabolic process	BIOLOGICAL_PROCESS	0.00118726	0.000236764	10	0	3619	4728
[OVER]	GO:0051924	regulation of calcium ion transport	BIOLOGICAL_PROCESS	0.00118726	0.000236764	10	0	3619	4728
[OVER]	GO:0071277	cellular response to calcium ion	BIOLOGICAL_PROCESS	0.00118726	0.000236764	10	0	3619	4728
[OVER]	GO:0071216	cellular response to biotic stimulus	BIOLOGICAL_PROCESS	0.00118726	0.000236764	10	0	3619	4728
[OVER]	GO:2001021	negative regulation of response to DNA damage stimulus	BIOLOGICAL_PROCESS	0.00118726	0.000236764	10	0	3619	4728
[OVER]	GO:0042770	signal transduction in response to DNA damage	BIOLOGICAL_PROCESS	0.00118726	0.000236764	10	0	3619	4728
[OVER]	GO:0016485	protein processing	BIOLOGICAL_PROCESS	0.00118726	0.000236764	10	0	3619	4728
[OVER]	GO:0000932	P-body	CELLULAR_COMPONENT	0.00118726	0.000236764	10	0	3619	4728
[OVER]	GO:0042752	regulation of circadian rhythm	BIOLOGICAL_PROCESS	0.00118726	0.000236764	10	0	3619	4728
[OVER]	GO:0090303	positive regulation of wound healing	BIOLOGICAL_PROCESS	0.00118726	0.000236764	10	0	3619	4728
[OVER]	GO:0009267	cellular response to starvation	BIOLOGICAL_PROCESS	0.00118726	0.000236764	10	0	3619	4728
[OVER]	GO:0034250	positive regulation of cellular amide metabolic process	BIOLOGICAL_PROCESS	0.00118726	0.000236764	10	0	3619	4728
[OVER]	GO:0034249	negative regulation of cellular amide metabolic process	BIOLOGICAL_PROCESS	0.00118726	0.000236764	10	0	3619	4728
[OVER]	GO:0004536	deoxyribonuclease activity	MOLECULAR_FUNCTION	0.00118726	0.000236764	10	0	3619	4728
[OVER]	GO:0016575	histone deacetylation	BIOLOGICAL_PROCESS	0.00118726	0.000236764	10	0	3619	4728
[OVER]	GO:0030838	positive regulation of actin filament polymerization	BIOLOGICAL_PROCESS	0.00118726	0.000236764	10	0	3619	4728
[OVER]	GO:1901505	carbohydrate derivative transmembrane transporter activity	MOLECULAR_FUNCTION	0.00118726	0.000236764	10	0	3619	4728
[OVER]	GO:0005834	heterotrimeric G-protein complex	CELLULAR_COMPONENT	0.00118726	0.000236764	10	0	3619	4728
[OVER]	GO:0006814	sodium ion transport	BIOLOGICAL_PROCESS	0.00118726	0.000236764	10	0	3619	4728
[OVER]	GO:2001234	negative regulation of apoptotic signaling pathway	BIOLOGICAL_PROCESS	0.00118726	0.000236764	10	0	3619	4728
[OVER]	GO:2001235	positive regulation of apoptotic signaling pathway	BIOLOGICAL_PROCESS	0.00118726	0.000236764	10	0	3619	4728
[OVER]	GO:1902749	regulation of cell cycle G2/M phase transition	BIOLOGICAL_PROCESS	0.00118726	0.000236764	10	0	3619	4728
[OVER]	GO:0001935	endothelial cell proliferation	BIOLOGICAL_PROCESS	0.00118726	0.000236764	10	0	3619	4728
[OVER]	GO:0006941	striated muscle contraction	BIOLOGICAL_PROCESS	0.00118726	0.000236764	10	0	3619	4728
[OVER]	GO:0003015	heart process	BIOLOGICAL_PROCESS	0.00118726	0.000236764	10	0	3619	4728
[OVER]	GO:0042594	response to starvation	BIOLOGICAL_PROCESS	0.00118726	0.000236764	10	0	3619	4728
[OVER]	GO:0034109	homotypic cell-cell adhesion	BIOLOGICAL_PROCESS	0.00118726	0.000236764	10	0	3619	4728
[OVER]	GO:0009161	ribonucleoside monophosphate metabolic process	BIOLOGICAL_PROCESS	0.00118726	0.000236764	10	0	3619	4728
[OVER]	GO:0090276	regulation of peptide hormone secretion	BIOLOGICAL_PROCESS	0.00118726	0.000236764	10	0	3619	4728
[OVER]	GO:1903900	regulation of viral life cycle	BIOLOGICAL_PROCESS	0.00118726	0.000236764	10	0	3619	4728
[OVER]	GO:0070374	positive regulation of ERK1 and ERK2 cascade	BIOLOGICAL_PROCESS	0.00118726	0.000236764	10	0	3619	4728
[OVER]	GO:0051251	positive regulation of lymphocyte activation	BIOLOGICAL_PROCESS	0.00118726	0.000236764	10	0	3619	4728
[OVER]	GO:0007044	cell-substrate junction assembly	BIOLOGICAL_PROCESS	0.00118726	0.000236764	10	0	3619	4728
[OVER]	GO:0046677	response to antibiotic	BIOLOGICAL_PROCESS	0.00118726	0.000236764	10	0	3619	4728
[OVER]	GO:0051303	establishment of chromosome localization	BIOLOGICAL_PROCESS	0.00118726	0.000236764	10	0	3619	4728
[OVER]	GO:0003684	damaged DNA binding	MOLECULAR_FUNCTION	0.00118726	0.000236764	10	0	3619	4728
[OVER]	GO:0021510	spinal cord development	BIOLOGICAL_PROCESS	0.00118726	0.000236764	10	0	3619	4728
[OVER]	GO:0050000	chromosome localization	BIOLOGICAL_PROCESS	0.00118726	0.000236764	10	0	3619	4728
[OVER]	GO:0010761	fibroblast migration	BIOLOGICAL_PROCESS	0.00118726	0.000236764	10	0	3619	4728
[OVER]	GO:0032102	negative regulation of response to external stimulus	BIOLOGICAL_PROCESS	0.00118726	0.000236764	10	0	3619	4728
[OVER]	GO:1901981	phosphatidylinositol phosphate binding	MOLECULAR_FUNCTION	0.00118726	0.000236764	10	0	3619	4728
[OVER]	GO:1904029	regulation of cyclin-dependent protein kinase activity	BIOLOGICAL_PROCESS	0.00118726	0.000236764	10	0	3619	4728
[OVER]	GO:1905360	GTPase complex	CELLULAR_COMPONENT	0.00118726	0.000236764	10	0	3619	4728
[OVER]	GO:0033135	regulation of peptidyl-serine phosphorylation	BIOLOGICAL_PROCESS	0.00118726	0.000236764	10	0	3619	4728
[OVER]	GO:1901879	regulation of protein depolymerization	BIOLOGICAL_PROCESS	0.00118726	0.000236764	10	0	3619	4728
[OVER]	GO:0070265	necrotic cell death	BIOLOGICAL_PROCESS	0.00118726	0.000236764	10	0	3619	4728
[OVER]	GO:0016782	transferase activity, transferring sulfur-containing groups	MOLECULAR_FUNCTION	0.00118726	0.000236764	10	0	3619	4728
[OVER]	GO:0051087	chaperone binding	MOLECULAR_FUNCTION	0.00118726	0.000236764	10	0	3619	4728
[OVER]	GO:0046540	U4/U6 x U5 tri-snRNP complex	CELLULAR_COMPONENT	0.00118726	0.000236764	10	0	3619	4728
[OVER]	GO:0048029	monosaccharide binding	MOLECULAR_FUNCTION	0.00118726	0.000236764	10	0	3619	4728
[OVER]	GO:0000079	regulation of cyclin-dependent protein serine/threonine kinase activity	BIOLOGICAL_PROCESS	0.00118726	0.000236764	10	0	3619	4728
[OVER]	GO:0048041	focal adhesion assembly	BIOLOGICAL_PROCESS	0.00118726	0.000236764	10	0	3619	4728
[OVER]	GO:0031109	microtubule polymerization or depolymerization	BIOLOGICAL_PROCESS	0.00118726	0.000236764	10	0	3619	4728
[OVER]	GO:0043122	regulation of I-kappaB kinase/NF-kappaB signaling	BIOLOGICAL_PROCESS	0.00118726	0.000236764	10	0	3619	4728
[OVER]	GO:0045727	positive regulation of translation	BIOLOGICAL_PROCESS	0.00118726	0.000236764	10	0	3619	4728
[OVER]	GO:0032482	Rab protein signal transduction	BIOLOGICAL_PROCESS	0.00118726	0.000236764	10	0	3619	4728
[OVER]	GO:0015932	nucleobase-containing compound transmembrane transporter activity	MOLECULAR_FUNCTION	0.00118726	0.000236764	10	0	3619	4728
[OVER]	GO:1903364	positive regulation of cellular protein catabolic process	BIOLOGICAL_PROCESS	0.00118726	0.000236764	10	0	3619	4728
[OVER]	GO:0006334	nucleosome assembly	BIOLOGICAL_PROCESS	0.00118726	0.000236764	10	0	3619	4728
[OVER]	GO:0031227	intrinsic component of endoplasmic reticulum membrane	CELLULAR_COMPONENT	0.00118726	0.000236764	10	0	3619	4728
[OVER]	GO:0006275	regulation of DNA replication	BIOLOGICAL_PROCESS	0.00118726	0.000236764	10	0	3619	4728
[OVER]	GO:0043297	apical junction assembly	BIOLOGICAL_PROCESS	0.00118726	0.000236764	10	0	3619	4728
[OVER]	GO:0051403	stress-activated MAPK cascade	BIOLOGICAL_PROCESS	0.00118726	0.000236764	10	0	3619	4728
[OVER]	GO:0002460	adaptive immune response based on somatic recombination of immune receptors built from immunoglobulin superfamily domains	BIOLOGICAL_PROCESS	0.00118726	0.000236764	10	0	3619	4728
[OVER]	GO:0009895	negative regulation of catabolic process	BIOLOGICAL_PROCESS	0.00118726	0.000236764	10	0	3619	4728
[OVER]	GO:0046822	regulation of nucleocytoplasmic transport	BIOLOGICAL_PROCESS	0.00118726	0.000236764	10	0	3619	4728
[OVER]	GO:0003727	single-stranded RNA binding	MOLECULAR_FUNCTION	0.00118726	0.000236764	10	0	3619	4728
[OVER]	GO:0044297	cell body	CELLULAR_COMPONENT	0.00118726	0.000236764	10	0	3619	4728
[OVER]	GO:0002449	lymphocyte mediated immunity	BIOLOGICAL_PROCESS	0.00118726	0.000236764	10	0	3619	4728
[OVER]	GO:0018107	peptidyl-threonine phosphorylation	BIOLOGICAL_PROCESS	0.00118726	0.000236764	10	0	3619	4728
[OVER]	GO:0051592	response to calcium ion	BIOLOGICAL_PROCESS	0.00118726	0.000236764	10	0	3619	4728
[OVER]	GO:0018024	histone-lysine N-methyltransferase activity	MOLECULAR_FUNCTION	0.00118726	0.000236764	10	0	3619	4728
[OVER]	GO:0045666	positive regulation of neuron differentiation	BIOLOGICAL_PROCESS	0.00118726	0.000236764	10	0	3619	4728
[OVER]	GO:0007369	gastrulation	BIOLOGICAL_PROCESS	0.00118726	0.000236764	10	0	3619	4728
[OVER]	GO:0033627	cell adhesion mediated by integrin	BIOLOGICAL_PROCESS	0.00118726	0.000236764	10	0	3619	4728
[OVER]	GO:1903052	positive regulation of proteolysis involved in cellular protein catabolic process	BIOLOGICAL_PROCESS	0.00118726	0.000236764	10	0	3619	4728
[OVER]	GO:0031072	heat shock protein binding	MOLECULAR_FUNCTION	0.00118726	0.000236764	10	0	3619	4728
[OVER]	GO:0031056	regulation of histone modification	BIOLOGICAL_PROCESS	0.00118726	0.000236764	10	0	3619	4728
[OVER]	GO:0031098	stress-activated protein kinase signaling cascade	BIOLOGICAL_PROCESS	0.00118726	0.000236764	10	0	3619	4728
[OVER]	GO:0140029	exocytic process	BIOLOGICAL_PROCESS	0.00131594	0.000262572	18	4	3611	4724
[OVER]	GO:0017137	Rab GTPase binding	MOLECULAR_FUNCTION	0.00158672	0.000317485	16	3	3613	4725
[OVER]	GO:0051983	regulation of chromosome segregation	BIOLOGICAL_PROCESS	0.00158672	0.000317485	16	3	3613	4725
[OVER]	GO:1901991	negative regulation of mitotic cell cycle phase transition	BIOLOGICAL_PROCESS	0.00158672	0.000317485	16	3	3613	4725
[OVER]	GO:0016758	transferase activity, transferring hexosyl groups	MOLECULAR_FUNCTION	0.00158672	0.000317485	16	3	3613	4725
[OVER]	GO:0140056	organelle localization by membrane tethering	BIOLOGICAL_PROCESS	0.00158672	0.000317485	16	3	3613	4725
[OVER]	GO:0006473	protein acetylation	BIOLOGICAL_PROCESS	0.00172677	0.000347049	12	1	3617	4727
[OVER]	GO:0032868	response to insulin	BIOLOGICAL_PROCESS	0.00172677	0.000347049	12	1	3617	4727
[OVER]	GO:0005262	calcium channel activity	MOLECULAR_FUNCTION	0.00172677	0.000347049	12	1	3617	4727
[OVER]	GO:0015293	symporter activity	MOLECULAR_FUNCTION	0.00172677	0.000347049	12	1	3617	4727
[OVER]	GO:0042552	myelination	BIOLOGICAL_PROCESS	0.00172677	0.000347049	12	1	3617	4727
[OVER]	GO:0051259	protein complex oligomerization	BIOLOGICAL_PROCESS	0.00172677	0.000347049	12	1	3617	4727
[OVER]	GO:0008366	axon ensheathment	BIOLOGICAL_PROCESS	0.00172677	0.000347049	12	1	3617	4727
[OVER]	GO:0007272	ensheathment of neurons	BIOLOGICAL_PROCESS	0.00172677	0.000347049	12	1	3617	4727
[OVER]	GO:0072507	divalent inorganic cation homeostasis	BIOLOGICAL_PROCESS	0.00177091	0.000356514	14	2	3615	4726
[OVER]	GO:0007266	Rho protein signal transduction	BIOLOGICAL_PROCESS	0.00177091	0.000356514	14	2	3615	4726
[OVER]	GO:0055074	calcium ion homeostasis	BIOLOGICAL_PROCESS	0.00177091	0.000356514	14	2	3615	4726
[OVER]	GO:0004180	carboxypeptidase activity	MOLECULAR_FUNCTION	0.00248496	0.000500539	17	4	3612	4724
[OVER]	GO:0050796	regulation of insulin secretion	BIOLOGICAL_PROCESS	0.00250148	0.000545995	9	0	3620	4728
[OVER]	GO:0006638	neutral lipid metabolic process	BIOLOGICAL_PROCESS	0.00250148	0.000545995	9	0	3620	4728
[OVER]	GO:0006639	acylglycerol metabolic process	BIOLOGICAL_PROCESS	0.00250148	0.000545995	9	0	3620	4728
[OVER]	GO:0043621	protein self-association	MOLECULAR_FUNCTION	0.00250148	0.000545995	9	0	3620	4728
[OVER]	GO:0005342	organic acid transmembrane transporter activity	MOLECULAR_FUNCTION	0.00250148	0.000545995	9	0	3620	4728
[OVER]	GO:0005347	ATP transmembrane transporter activity	MOLECULAR_FUNCTION	0.00250148	0.000545995	9	0	3620	4728
[OVER]	GO:0005346	purine ribonucleotide transmembrane transporter activity	MOLECULAR_FUNCTION	0.00250148	0.000545995	9	0	3620	4728
[OVER]	GO:0030317	flagellated sperm motility	BIOLOGICAL_PROCESS	0.00250148	0.000545995	9	0	3620	4728
[OVER]	GO:0050732	negative regulation of peptidyl-tyrosine phosphorylation	BIOLOGICAL_PROCESS	0.00250148	0.000545995	9	0	3620	4728
[OVER]	GO:2000060	positive regulation of ubiquitin-dependent protein catabolic process	BIOLOGICAL_PROCESS	0.00250148	0.000545995	9	0	3620	4728
[OVER]	GO:0001837	epithelial to mesenchymal transition	BIOLOGICAL_PROCESS	0.00250148	0.000545995	9	0	3620	4728
[OVER]	GO:0048524	positive regulation of viral process	BIOLOGICAL_PROCESS	0.00250148	0.000545995	9	0	3620	4728
[OVER]	GO:0001894	tissue homeostasis	BIOLOGICAL_PROCESS	0.00250148	0.000545995	9	0	3620	4728
[OVER]	GO:0050863	regulation of T cell activation	BIOLOGICAL_PROCESS	0.00250148	0.000545995	9	0	3620	4728
[OVER]	GO:0051893	regulation of focal adhesion assembly	BIOLOGICAL_PROCESS	0.00250148	0.000545995	9	0	3620	4728
[OVER]	GO:0000281	mitotic cytokinesis	BIOLOGICAL_PROCESS	0.00250148	0.000545995	9	0	3620	4728
[OVER]	GO:0000295	adenine nucleotide transmembrane transporter activity	MOLECULAR_FUNCTION	0.00250148	0.000545995	9	0	3620	4728
[OVER]	GO:0036293	response to decreased oxygen levels	BIOLOGICAL_PROCESS	0.00250148	0.000545995	9	0	3620	4728
[OVER]	GO:0019722	calcium-mediated signaling	BIOLOGICAL_PROCESS	0.00250148	0.000545995	9	0	3620	4728
[OVER]	GO:0019751	polyol metabolic process	BIOLOGICAL_PROCESS	0.00250148	0.000545995	9	0	3620	4728
[OVER]	GO:0031349	positive regulation of defense response	BIOLOGICAL_PROCESS	0.00250148	0.000545995	9	0	3620	4728
[OVER]	GO:0001508	action potential	BIOLOGICAL_PROCESS	0.00250148	0.000545995	9	0	3620	4728
[OVER]	GO:0031396	regulation of protein ubiquitination	BIOLOGICAL_PROCESS	0.00250148	0.000545995	9	0	3620	4728
[OVER]	GO:0030042	actin filament depolymerization	BIOLOGICAL_PROCESS	0.00250148	0.000545995	9	0	3620	4728
[OVER]	GO:0030038	contractile actin filament bundle assembly	BIOLOGICAL_PROCESS	0.00250148	0.000545995	9	0	3620	4728
[OVER]	GO:1990841	promoter-specific chromatin binding	MOLECULAR_FUNCTION	0.00250148	0.000545995	9	0	3620	4728
[OVER]	GO:0001578	microtubule bundle formation	BIOLOGICAL_PROCESS	0.00250148	0.000545995	9	0	3620	4728
[OVER]	GO:0050679	positive regulation of epithelial cell proliferation	BIOLOGICAL_PROCESS	0.00250148	0.000545995	9	0	3620	4728
[OVER]	GO:0006505	GPI anchor metabolic process	BIOLOGICAL_PROCESS	0.00250148	0.000545995	9	0	3620	4728
[OVER]	GO:0006575	cellular modified amino acid metabolic process	BIOLOGICAL_PROCESS	0.00250148	0.000545995	9	0	3620	4728
[OVER]	GO:0060047	heart contraction	BIOLOGICAL_PROCESS	0.00250148	0.000545995	9	0	3620	4728
[OVER]	GO:0032872	regulation of stress-activated MAPK cascade	BIOLOGICAL_PROCESS	0.00250148	0.000545995	9	0	3620	4728
[OVER]	GO:0097300	programmed necrotic cell death	BIOLOGICAL_PROCESS	0.00250148	0.000545995	9	0	3620	4728
[OVER]	GO:0042147	retrograde transport, endosome to Golgi	BIOLOGICAL_PROCESS	0.00250148	0.000545995	9	0	3620	4728
[OVER]	GO:0043487	regulation of RNA stability	BIOLOGICAL_PROCESS	0.00250148	0.000545995	9	0	3620	4728
[OVER]	GO:0032781	positive regulation of ATPase activity	BIOLOGICAL_PROCESS	0.00250148	0.000545995	9	0	3620	4728
[OVER]	GO:0030193	regulation of blood coagulation	BIOLOGICAL_PROCESS	0.00250148	0.000545995	9	0	3620	4728
[OVER]	GO:0030177	positive regulation of Wnt signaling pathway	BIOLOGICAL_PROCESS	0.00250148	0.000545995	9	0	3620	4728
[OVER]	GO:0001666	response to hypoxia	BIOLOGICAL_PROCESS	0.00250148	0.000545995	9	0	3620	4728
[OVER]	GO:0000922	spindle pole	CELLULAR_COMPONENT	0.00250148	0.000545995	9	0	3620	4728
[OVER]	GO:0060541	respiratory system development	BIOLOGICAL_PROCESS	0.00250148	0.000545995	9	0	3620	4728
[OVER]	GO:0070063	RNA polymerase binding	MOLECULAR_FUNCTION	0.00250148	0.000545995	9	0	3620	4728
[OVER]	GO:0016574	histone ubiquitination	BIOLOGICAL_PROCESS	0.00250148	0.000545995	9	0	3620	4728
[OVER]	GO:0030863	cortical cytoskeleton	CELLULAR_COMPONENT	0.00250148	0.000545995	9	0	3620	4728
[OVER]	GO:1901568	fatty acid derivative metabolic process	BIOLOGICAL_PROCESS	0.00250148	0.000545995	9	0	3620	4728
[OVER]	GO:0015216	purine nucleotide transmembrane transporter activity	MOLECULAR_FUNCTION	0.00250148	0.000545995	9	0	3620	4728
[OVER]	GO:0015215	nucleotide transmembrane transporter activity	MOLECULAR_FUNCTION	0.00250148	0.000545995	9	0	3620	4728
[OVER]	GO:1905037	autophagosome organization	BIOLOGICAL_PROCESS	0.00250148	0.000545995	9	0	3620	4728
[OVER]	GO:0008083	growth factor activity	MOLECULAR_FUNCTION	0.00250148	0.000545995	9	0	3620	4728
[OVER]	GO:0034067	protein localization to Golgi apparatus	BIOLOGICAL_PROCESS	0.00250148	0.000545995	9	0	3620	4728
[OVER]	GO:0005518	collagen binding	MOLECULAR_FUNCTION	0.00250148	0.000545995	9	0	3620	4728
[OVER]	GO:0060326	cell chemotaxis	BIOLOGICAL_PROCESS	0.00250148	0.000545995	9	0	3620	4728
[OVER]	GO:0030509	BMP signaling pathway	BIOLOGICAL_PROCESS	0.00250148	0.000545995	9	0	3620	4728
[OVER]	GO:0006890	retrograde vesicle-mediated transport, Golgi to endoplasmic reticulum	BIOLOGICAL_PROCESS	0.00250148	0.000545995	9	0	3620	4728
[OVER]	GO:0006892	post-Golgi vesicle-mediated transport	BIOLOGICAL_PROCESS	0.00250148	0.000545995	9	0	3620	4728
[OVER]	GO:0006862	nucleotide transport	BIOLOGICAL_PROCESS	0.00250148	0.000545995	9	0	3620	4728
[OVER]	GO:0030534	adult behavior	BIOLOGICAL_PROCESS	0.00250148	0.000545995	9	0	3620	4728
[OVER]	GO:0090109	regulation of cell-substrate junction assembly	BIOLOGICAL_PROCESS	0.00250148	0.000545995	9	0	3620	4728
[OVER]	GO:0042471	ear morphogenesis	BIOLOGICAL_PROCESS	0.00250148	0.000545995	9	0	3620	4728
[OVER]	GO:0050954	sensory perception of mechanical stimulus	BIOLOGICAL_PROCESS	0.00250148	0.000545995	9	0	3620	4728
[OVER]	GO:1900024	regulation of substrate adhesion-dependent cell spreading	BIOLOGICAL_PROCESS	0.00250148	0.000545995	9	0	3620	4728
[OVER]	GO:1900046	regulation of hemostasis	BIOLOGICAL_PROCESS	0.00250148	0.000545995	9	0	3620	4728
[OVER]	GO:0097722	sperm motility	BIOLOGICAL_PROCESS	0.00250148	0.000545995	9	0	3620	4728
[OVER]	GO:0005657	replication fork	CELLULAR_COMPONENT	0.00250148	0.000545995	9	0	3620	4728
[OVER]	GO:0009124	nucleoside monophosphate biosynthetic process	BIOLOGICAL_PROCESS	0.00250148	0.000545995	9	0	3620	4728
[OVER]	GO:0000792	heterochromatin	CELLULAR_COMPONENT	0.00250148	0.000545995	9	0	3620	4728
[OVER]	GO:0042593	glucose homeostasis	BIOLOGICAL_PROCESS	0.00250148	0.000545995	9	0	3620	4728
[OVER]	GO:0009156	ribonucleoside monophosphate biosynthetic process	BIOLOGICAL_PROCESS	0.00250148	0.000545995	9	0	3620	4728
[OVER]	GO:0048771	tissue remodeling	BIOLOGICAL_PROCESS	0.00250148	0.000545995	9	0	3620	4728
[OVER]	GO:0090288	negative regulation of cellular response to growth factor stimulus	BIOLOGICAL_PROCESS	0.00250148	0.000545995	9	0	3620	4728
[OVER]	GO:0009190	cyclic nucleotide biosynthetic process	BIOLOGICAL_PROCESS	0.00250148	0.000545995	9	0	3620	4728
[OVER]	GO:0009187	cyclic nucleotide metabolic process	BIOLOGICAL_PROCESS	0.00250148	0.000545995	9	0	3620	4728
[OVER]	GO:0002237	response to molecule of bacterial origin	BIOLOGICAL_PROCESS	0.00250148	0.000545995	9	0	3620	4728
[OVER]	GO:0002221	pattern recognition receptor signaling pathway	BIOLOGICAL_PROCESS	0.00250148	0.000545995	9	0	3620	4728
[OVER]	GO:0002224	toll-like receptor signaling pathway	BIOLOGICAL_PROCESS	0.00250148	0.000545995	9	0	3620	4728
[OVER]	GO:0071695	anatomical structure maturation	BIOLOGICAL_PROCESS	0.00250148	0.000545995	9	0	3620	4728
[OVER]	GO:0002274	myeloid leukocyte activation	BIOLOGICAL_PROCESS	0.00250148	0.000545995	9	0	3620	4728
[OVER]	GO:1903037	regulation of leukocyte cell-cell adhesion	BIOLOGICAL_PROCESS	0.00250148	0.000545995	9	0	3620	4728
[OVER]	GO:0051216	cartilage development	BIOLOGICAL_PROCESS	0.00250148	0.000545995	9	0	3620	4728
[OVER]	GO:0008408	3'-5' exonuclease activity	MOLECULAR_FUNCTION	0.00250148	0.000545995	9	0	3620	4728
[OVER]	GO:0010632	regulation of epithelial cell migration	BIOLOGICAL_PROCESS	0.00250148	0.000545995	9	0	3620	4728
[OVER]	GO:0019079	viral genome replication	BIOLOGICAL_PROCESS	0.00250148	0.000545995	9	0	3620	4728
[OVER]	GO:0016849	phosphorus-oxygen lyase activity	MOLECULAR_FUNCTION	0.00250148	0.000545995	9	0	3620	4728
[OVER]	GO:0046683	response to organophosphorus	BIOLOGICAL_PROCESS	0.00250148	0.000545995	9	0	3620	4728
[OVER]	GO:0070302	regulation of stress-activated protein kinase signaling cascade	BIOLOGICAL_PROCESS	0.00250148	0.000545995	9	0	3620	4728
[OVER]	GO:0016999	antibiotic metabolic process	BIOLOGICAL_PROCESS	0.00250148	0.000545995	9	0	3620	4728
[OVER]	GO:0051310	metaphase plate congression	BIOLOGICAL_PROCESS	0.00250148	0.000545995	9	0	3620	4728
[OVER]	GO:0070482	response to oxygen levels	BIOLOGICAL_PROCESS	0.00250148	0.000545995	9	0	3620	4728
[OVER]	GO:0052652	cyclic purine nucleotide metabolic process	BIOLOGICAL_PROCESS	0.00250148	0.000545995	9	0	3620	4728
[OVER]	GO:0010770	positive regulation of cell morphogenesis involved in differentiation	BIOLOGICAL_PROCESS	0.00250148	0.000545995	9	0	3620	4728
[OVER]	GO:0010762	regulation of fibroblast migration	BIOLOGICAL_PROCESS	0.00250148	0.000545995	9	0	3620	4728
[OVER]	GO:0007187	G protein-coupled receptor signaling pathway, coupled to cyclic nucleotide second messenger	BIOLOGICAL_PROCESS	0.00250148	0.000545995	9	0	3620	4728
[OVER]	GO:0007188	adenylate cyclase-modulating G protein-coupled receptor signaling pathway	BIOLOGICAL_PROCESS	0.00250148	0.000545995	9	0	3620	4728
[OVER]	GO:0008484	sulfuric ester hydrolase activity	MOLECULAR_FUNCTION	0.00250148	0.000545995	9	0	3620	4728
[OVER]	GO:0071772	response to BMP	BIOLOGICAL_PROCESS	0.00250148	0.000545995	9	0	3620	4728
[OVER]	GO:0071773	cellular response to BMP stimulus	BIOLOGICAL_PROCESS	0.00250148	0.000545995	9	0	3620	4728
[OVER]	GO:1901992	positive regulation of mitotic cell cycle phase transition	BIOLOGICAL_PROCESS	0.00250148	0.000545995	9	0	3620	4728
[OVER]	GO:0015605	organophosphate ester transmembrane transporter activity	MOLECULAR_FUNCTION	0.00250148	0.000545995	9	0	3620	4728
[OVER]	GO:0014074	response to purine-containing compound	BIOLOGICAL_PROCESS	0.00250148	0.000545995	9	0	3620	4728
[OVER]	GO:0022409	positive regulation of cell-cell adhesion	BIOLOGICAL_PROCESS	0.00250148	0.000545995	9	0	3620	4728
[OVER]	GO:0009410	response to xenobiotic stimulus	BIOLOGICAL_PROCESS	0.00250148	0.000545995	9	0	3620	4728
[OVER]	GO:1901800	positive regulation of proteasomal protein catabolic process	BIOLOGICAL_PROCESS	0.00250148	0.000545995	9	0	3620	4728
[OVER]	GO:0045292	mRNA cis splicing, via spliceosome	BIOLOGICAL_PROCESS	0.00250148	0.000545995	9	0	3620	4728
[OVER]	GO:0099003	vesicle-mediated transport in synapse	BIOLOGICAL_PROCESS	0.00250148	0.000545995	9	0	3620	4728
[OVER]	GO:0000045	autophagosome assembly	BIOLOGICAL_PROCESS	0.00250148	0.000545995	9	0	3620	4728
[OVER]	GO:0051668	localization within membrane	BIOLOGICAL_PROCESS	0.00250148	0.000545995	9	0	3620	4728
[OVER]	GO:0051607	defense response to virus	BIOLOGICAL_PROCESS	0.00250148	0.000545995	9	0	3620	4728
[OVER]	GO:0045814	negative regulation of gene expression, epigenetic	BIOLOGICAL_PROCESS	0.00250148	0.000545995	9	0	3620	4728
[OVER]	GO:0099643	signal release from synapse	BIOLOGICAL_PROCESS	0.00250148	0.000545995	9	0	3620	4728
[OVER]	GO:0032434	regulation of proteasomal ubiquitin-dependent protein catabolic process	BIOLOGICAL_PROCESS	0.00250148	0.000545995	9	0	3620	4728
[OVER]	GO:0018126	protein hydroxylation	BIOLOGICAL_PROCESS	0.00250148	0.000545995	9	0	3620	4728
[OVER]	GO:0015908	fatty acid transport	BIOLOGICAL_PROCESS	0.00250148	0.000545995	9	0	3620	4728
[OVER]	GO:0032496	response to lipopolysaccharide	BIOLOGICAL_PROCESS	0.00250148	0.000545995	9	0	3620	4728
[OVER]	GO:0043149	stress fiber assembly	BIOLOGICAL_PROCESS	0.00250148	0.000545995	9	0	3620	4728
[OVER]	GO:1903305	regulation of regulated secretory pathway	BIOLOGICAL_PROCESS	0.00250148	0.000545995	9	0	3620	4728
[OVER]	GO:0021915	neural tube development	BIOLOGICAL_PROCESS	0.00250148	0.000545995	9	0	3620	4728
[OVER]	GO:0007612	learning	BIOLOGICAL_PROCESS	0.00250148	0.000545995	9	0	3620	4728
[OVER]	GO:0007605	sensory perception of sound	BIOLOGICAL_PROCESS	0.00250148	0.000545995	9	0	3620	4728
[OVER]	GO:0006360	transcription by RNA polymerase I	BIOLOGICAL_PROCESS	0.00250148	0.000545995	9	0	3620	4728
[OVER]	GO:0006284	base-excision repair	BIOLOGICAL_PROCESS	0.00250148	0.000545995	9	0	3620	4728
[OVER]	GO:0006298	mismatch repair	BIOLOGICAL_PROCESS	0.00250148	0.000545995	9	0	3620	4728
[OVER]	GO:0018298	protein-chromophore linkage	BIOLOGICAL_PROCESS	0.00250148	0.000545995	9	0	3620	4728
[OVER]	GO:0002703	regulation of leukocyte mediated immunity	BIOLOGICAL_PROCESS	0.00250148	0.000545995	9	0	3620	4728
[OVER]	GO:0002761	regulation of myeloid leukocyte differentiation	BIOLOGICAL_PROCESS	0.00250148	0.000545995	9	0	3620	4728
[OVER]	GO:0043281	regulation of cysteine-type endopeptidase activity involved in apoptotic process	BIOLOGICAL_PROCESS	0.00250148	0.000545995	9	0	3620	4728
[OVER]	GO:0000152	nuclear ubiquitin ligase complex	CELLULAR_COMPONENT	0.00250148	0.000545995	9	0	3620	4728
[OVER]	GO:0002793	positive regulation of peptide secretion	BIOLOGICAL_PROCESS	0.00250148	0.000545995	9	0	3620	4728
[OVER]	GO:0022904	respiratory electron transport chain	BIOLOGICAL_PROCESS	0.00250148	0.000545995	9	0	3620	4728
[OVER]	GO:0006006	glucose metabolic process	BIOLOGICAL_PROCESS	0.00250148	0.000545995	9	0	3620	4728
[OVER]	GO:0009975	cyclase activity	MOLECULAR_FUNCTION	0.00250148	0.000545995	9	0	3620	4728
[OVER]	GO:0010952	positive regulation of peptidase activity	BIOLOGICAL_PROCESS	0.00250148	0.000545995	9	0	3620	4728
[OVER]	GO:0009982	pseudouridine synthase activity	MOLECULAR_FUNCTION	0.00250148	0.000545995	9	0	3620	4728
[OVER]	GO:0007269	neurotransmitter secretion	BIOLOGICAL_PROCESS	0.00250148	0.000545995	9	0	3620	4728
[OVER]	GO:0021543	pallium development	BIOLOGICAL_PROCESS	0.00250148	0.000545995	9	0	3620	4728
[OVER]	GO:0046890	regulation of lipid biosynthetic process	BIOLOGICAL_PROCESS	0.00250148	0.000545995	9	0	3620	4728
[OVER]	GO:0033500	carbohydrate homeostasis	BIOLOGICAL_PROCESS	0.00250148	0.000545995	9	0	3620	4728
[OVER]	GO:0019213	deacetylase activity	MOLECULAR_FUNCTION	0.00250148	0.000545995	9	0	3620	4728
[OVER]	GO:0046824	positive regulation of nucleocytoplasmic transport	BIOLOGICAL_PROCESS	0.00250148	0.000545995	9	0	3620	4728
[OVER]	GO:0032272	negative regulation of protein polymerization	BIOLOGICAL_PROCESS	0.00250148	0.000545995	9	0	3620	4728
[OVER]	GO:0003707	steroid hormone receptor activity	MOLECULAR_FUNCTION	0.00250148	0.000545995	9	0	3620	4728
[OVER]	GO:0070527	platelet aggregation	BIOLOGICAL_PROCESS	0.00250148	0.000545995	9	0	3620	4728
[OVER]	GO:0045598	regulation of fat cell differentiation	BIOLOGICAL_PROCESS	0.00250148	0.000545995	9	0	3620	4728
[OVER]	GO:0051503	adenine nucleotide transport	BIOLOGICAL_PROCESS	0.00250148	0.000545995	9	0	3620	4728
[OVER]	GO:0099504	synaptic vesicle cycle	BIOLOGICAL_PROCESS	0.00250148	0.000545995	9	0	3620	4728
[OVER]	GO:0044325	ion channel binding	MOLECULAR_FUNCTION	0.00250148	0.000545995	9	0	3620	4728
[OVER]	GO:0071949	FAD binding	MOLECULAR_FUNCTION	0.00250148	0.000545995	9	0	3620	4728
[OVER]	GO:0062197	cellular response to chemical stress	BIOLOGICAL_PROCESS	0.00250148	0.000545995	9	0	3620	4728
[OVER]	GO:0015868	purine ribonucleotide transport	BIOLOGICAL_PROCESS	0.00250148	0.000545995	9	0	3620	4728
[OVER]	GO:0015867	ATP transport	BIOLOGICAL_PROCESS	0.00250148	0.000545995	9	0	3620	4728
[OVER]	GO:0015865	purine nucleotide transport	BIOLOGICAL_PROCESS	0.00250148	0.000545995	9	0	3620	4728
[OVER]	GO:0070661	leukocyte proliferation	BIOLOGICAL_PROCESS	0.00250148	0.000545995	9	0	3620	4728
[OVER]	GO:2001251	negative regulation of chromosome organization	BIOLOGICAL_PROCESS	0.00284661	0.000622279	15	3	3614	4725
[OVER]	GO:0051606	detection of stimulus	BIOLOGICAL_PROCESS	0.00284661	0.000622279	15	3	3614	4725
[OVER]	GO:0015914	phospholipid transport	BIOLOGICAL_PROCESS	0.00284661	0.000622279	15	3	3614	4725
[OVER]	GO:0072503	cellular divalent inorganic cation homeostasis	BIOLOGICAL_PROCESS	0.00331252	0.000724867	13	2	3616	4726
[OVER]	GO:0006874	cellular calcium ion homeostasis	BIOLOGICAL_PROCESS	0.00331252	0.000724867	13	2	3616	4726
[OVER]	GO:1901214	regulation of neuron death	BIOLOGICAL_PROCESS	0.00337344	0.000742337	11	1	3618	4727
[OVER]	GO:0016052	carbohydrate catabolic process	BIOLOGICAL_PROCESS	0.00337344	0.000742337	11	1	3618	4727
[OVER]	GO:0032869	cellular response to insulin stimulus	BIOLOGICAL_PROCESS	0.00337344	0.000742337	11	1	3618	4727
[OVER]	GO:0048709	oligodendrocyte differentiation	BIOLOGICAL_PROCESS	0.00337344	0.000742337	11	1	3618	4727
[OVER]	GO:0002250	adaptive immune response	BIOLOGICAL_PROCESS	0.00337344	0.000742337	11	1	3618	4727
[OVER]	GO:0034705	potassium channel complex	CELLULAR_COMPONENT	0.00337344	0.000742337	11	1	3618	4727
[OVER]	GO:0003341	cilium movement	BIOLOGICAL_PROCESS	0.00337344	0.000742337	11	1	3618	4727
[OVER]	GO:0045177	apical part of cell	CELLULAR_COMPONENT	0.00337344	0.000742337	11	1	3618	4727
[OVER]	GO:1902017	regulation of cilium assembly	BIOLOGICAL_PROCESS	0.00337344	0.000742337	11	1	3618	4727
[OVER]	GO:0051402	neuron apoptotic process	BIOLOGICAL_PROCESS	0.00337344	0.000742337	11	1	3618	4727
[OVER]	GO:0010921	regulation of phosphatase activity	BIOLOGICAL_PROCESS	0.00337344	0.000742337	11	1	3618	4727
[OVER]	GO:0019903	protein phosphatase binding	MOLECULAR_FUNCTION	0.00532675	0.00125891	8	0	3621	4728
[OVER]	GO:0060113	inner ear receptor cell differentiation	BIOLOGICAL_PROCESS	0.00532675	0.00125891	8	0	3621	4728
[OVER]	GO:0060119	inner ear receptor cell development	BIOLOGICAL_PROCESS	0.00532675	0.00125891	8	0	3621	4728
[OVER]	GO:0035148	tube formation	BIOLOGICAL_PROCESS	0.00532675	0.00125891	8	0	3621	4728
[OVER]	GO:0019935	cyclic-nucleotide-mediated signaling	BIOLOGICAL_PROCESS	0.00532675	0.00125891	8	0	3621	4728
[OVER]	GO:0050773	regulation of dendrite development	BIOLOGICAL_PROCESS	0.00532675	0.00125891	8	0	3621	4728
[OVER]	GO:0031674	I band	CELLULAR_COMPONENT	0.00532675	0.00125891	8	0	3621	4728
[OVER]	GO:0030323	respiratory tube development	BIOLOGICAL_PROCESS	0.00532675	0.00125891	8	0	3621	4728
[OVER]	GO:0030324	lung development	BIOLOGICAL_PROCESS	0.00532675	0.00125891	8	0	3621	4728
[OVER]	GO:0050714	positive regulation of protein secretion	BIOLOGICAL_PROCESS	0.00532675	0.00125891	8	0	3621	4728
[OVER]	GO:0001763	morphogenesis of a branching structure	BIOLOGICAL_PROCESS	0.00532675	0.00125891	8	0	3621	4728
[OVER]	GO:0050885	neuromuscular process controlling balance	BIOLOGICAL_PROCESS	0.00532675	0.00125891	8	0	3621	4728
[OVER]	GO:0090090	negative regulation of canonical Wnt signaling pathway	BIOLOGICAL_PROCESS	0.00532675	0.00125891	8	0	3621	4728
[OVER]	GO:0097581	lamellipodium organization	BIOLOGICAL_PROCESS	0.00532675	0.00125891	8	0	3621	4728
[OVER]	GO:0097549	chromatin organization involved in negative regulation of transcription	BIOLOGICAL_PROCESS	0.00532675	0.00125891	8	0	3621	4728
[OVER]	GO:0048515	spermatid differentiation	BIOLOGICAL_PROCESS	0.00532675	0.00125891	8	0	3621	4728
[OVER]	GO:0150118	negative regulation of cell-substrate junction organization	BIOLOGICAL_PROCESS	0.00532675	0.00125891	8	0	3621	4728
[OVER]	GO:0051895	negative regulation of focal adhesion assembly	BIOLOGICAL_PROCESS	0.00532675	0.00125891	8	0	3621	4728
[OVER]	GO:0044728	DNA methylation or demethylation	BIOLOGICAL_PROCESS	0.00532675	0.00125891	8	0	3621	4728
[OVER]	GO:0030018	Z disc	CELLULAR_COMPONENT	0.00532675	0.00125891	8	0	3621	4728
[OVER]	GO:0097191	extrinsic apoptotic signaling pathway	BIOLOGICAL_PROCESS	0.00532675	0.00125891	8	0	3621	4728
[OVER]	GO:0070988	demethylation	BIOLOGICAL_PROCESS	0.00532675	0.00125891	8	0	3621	4728
[OVER]	GO:0030032	lamellipodium assembly	BIOLOGICAL_PROCESS	0.00532675	0.00125891	8	0	3621	4728
[OVER]	GO:0070993	translation preinitiation complex	CELLULAR_COMPONENT	0.00532675	0.00125891	8	0	3621	4728
[OVER]	GO:1903533	regulation of protein targeting	BIOLOGICAL_PROCESS	0.00532675	0.00125891	8	0	3621	4728
[OVER]	GO:0006506	GPI anchor biosynthetic process	BIOLOGICAL_PROCESS	0.00532675	0.00125891	8	0	3621	4728
[truncated: 1,006 more rows]

## Sheet: gonad
Tags	GO ID	GO Name	GO Category	FDR	P-Value	Nr Test	Nr Reference	Non Annot Test	Non Annot Reference
[OVER]	GO:0110165	cellular anatomical entity	CELLULAR_COMPONENT	0	0	2218	67	1071	1262
[OVER]	GO:0009987	cellular process	BIOLOGICAL_PROCESS	0	0	2235	70	1054	1259
[OVER]	GO:0005488	binding	MOLECULAR_FUNCTION	6.21436e-281	2.05027e-284	1856	55	1433	1274
[OVER]	GO:0008152	metabolic process	BIOLOGICAL_PROCESS	1.83563e-232	8.07492e-236	1671	57	1618	1272
[OVER]	GO:0005622	intracellular	CELLULAR_COMPONENT	2.21908e-200	1.22021e-203	1305	17	1984	1312
[OVER]	GO:0071704	organic substance metabolic process	BIOLOGICAL_PROCESS	7.51492e-197	4.95871e-200	1464	47	1825	1282
[OVER]	GO:0003824	catalytic activity	MOLECULAR_FUNCTION	1.3134e-195	1.01108e-198	1399	36	1890	1293
[OVER]	GO:0044238	primary metabolic process	BIOLOGICAL_PROCESS	2.32402e-185	2.04466e-188	1415	48	1874	1281
[OVER]	GO:0044237	cellular metabolic process	BIOLOGICAL_PROCESS	2.09656e-178	2.07512e-181	1412	54	1877	1275
[OVER]	GO:0043226	organelle	CELLULAR_COMPONENT	1.14368e-170	1.25775e-173	1161	17	2128	1312
[OVER]	GO:0006807	nitrogen compound metabolic process	BIOLOGICAL_PROCESS	4.79065e-166	5.79535e-169	1300	44	1989	1285
[OVER]	GO:0043229	intracellular organelle	CELLULAR_COMPONENT	6.42569e-164	8.47996e-167	1127	17	2162	1312
[OVER]	GO:0065007	biological regulation	BIOLOGICAL_PROCESS	1.26461e-160	1.80797e-163	1251	40	2038	1289
[OVER]	GO:0016020	membrane	CELLULAR_COMPONENT	3.69687e-157	5.69186e-160	1255	44	2034	1285
[OVER]	GO:0043170	macromolecule metabolic process	BIOLOGICAL_PROCESS	4.16433e-154	6.86956e-157	1234	43	2055	1286
[OVER]	GO:0050789	regulation of biological process	BIOLOGICAL_PROCESS	1.21211e-149	2.13282e-152	1178	37	2111	1292
[OVER]	GO:0050794	regulation of cellular process	BIOLOGICAL_PROCESS	4.64297e-143	8.68036e-146	1138	36	2151	1293
[OVER]	GO:0043167	ion binding	MOLECULAR_FUNCTION	1.5216e-139	3.01207e-142	1041	23	2248	1306
[OVER]	GO:0043227	membrane-bounded organelle	CELLULAR_COMPONENT	3.89346e-136	8.13546e-139	946	12	2343	1317
[OVER]	GO:0043231	intracellular membrane-bounded organelle	CELLULAR_COMPONENT	8.30802e-129	1.82734e-131	891	10	2398	1319
[OVER]	GO:0097159	organic cyclic compound binding	MOLECULAR_FUNCTION	1.86497e-120	4.30709e-123	1038	40	2251	1289
[OVER]	GO:1901363	heterocyclic compound binding	MOLECULAR_FUNCTION	4.08077e-120	9.8732e-123	1036	40	2253	1289
[OVER]	GO:0005737	cytoplasm	CELLULAR_COMPONENT	7.31657e-117	1.85067e-119	773	4	2516	1325
[OVER]	GO:0044260	cellular macromolecule metabolic process	BIOLOGICAL_PROCESS	5.55516e-113	1.46622e-115	1012	43	2277	1286
[OVER]	GO:0031224	intrinsic component of membrane	CELLULAR_COMPONENT	8.78823e-113	2.41621e-115	1000	41	2289	1288
[OVER]	GO:1901564	organonitrogen compound metabolic process	BIOLOGICAL_PROCESS	7.24536e-112	2.0717e-114	863	19	2426	1310
[OVER]	GO:0016021	integral component of membrane	CELLULAR_COMPONENT	4.68459e-111	1.391e-113	990	41	2299	1288
[OVER]	GO:0050896	response to stimulus	BIOLOGICAL_PROCESS	1.02193e-104	3.14683e-107	829	20	2460	1309
[OVER]	GO:0051716	cellular response to stimulus	BIOLOGICAL_PROCESS	5.30657e-98	1.69241e-100	756	15	2533	1314
[OVER]	GO:0019538	protein metabolic process	BIOLOGICAL_PROCESS	5.19816e-97	1.715e-99	771	18	2518	1311
[OVER]	GO:0005515	protein binding	MOLECULAR_FUNCTION	2.53754e-92	8.651e-95	661	7	2628	1322
[OVER]	GO:0005634	nucleus	CELLULAR_COMPONENT	4.16863e-86	1.46702e-88	633	8	2656	1321
[OVER]	GO:0051179	localization	BIOLOGICAL_PROCESS	1.31819e-85	4.78391e-88	646	10	2643	1319
[OVER]	GO:0023052	signaling	BIOLOGICAL_PROCESS	1.15877e-80	4.3328e-83	639	13	2650	1316
[OVER]	GO:0007154	cell communication	BIOLOGICAL_PROCESS	2.59353e-79	9.98278e-82	645	15	2644	1314
[OVER]	GO:0044267	cellular protein metabolic process	BIOLOGICAL_PROCESS	1.6262e-78	6.43826e-81	647	16	2642	1313
[OVER]	GO:0007165	signal transduction	BIOLOGICAL_PROCESS	2.07268e-75	8.43387e-78	607	13	2682	1316
[OVER]	GO:0016787	hydrolase activity	MOLECULAR_FUNCTION	4.17288e-75	1.74386e-77	567	8	2722	1321
[OVER]	GO:0071840	cellular component organization or biogenesis	BIOLOGICAL_PROCESS	9.99775e-75	4.28805e-77	539	5	2750	1324
[OVER]	GO:0034641	cellular nitrogen compound metabolic process	BIOLOGICAL_PROCESS	4.42307e-74	1.9457e-76	712	31	2577	1298
[OVER]	GO:0043169	cation binding	MOLECULAR_FUNCTION	3.80137e-73	1.71403e-75	600	14	2689	1315
[OVER]	GO:0043412	macromolecule modification	BIOLOGICAL_PROCESS	1.26519e-72	5.84384e-75	535	6	2754	1323
[OVER]	GO:0016740	transferase activity	MOLECULAR_FUNCTION	1.44025e-72	6.8108e-75	649	22	2640	1307
[OVER]	GO:0046872	metal ion binding	MOLECULAR_FUNCTION	7.08507e-72	3.42839e-74	592	14	2697	1315
[OVER]	GO:0016043	cellular component organization	BIOLOGICAL_PROCESS	1.81774e-71	8.99574e-74	519	5	2770	1324
[OVER]	GO:0032991	protein-containing complex	CELLULAR_COMPONENT	1.10248e-70	5.57728e-73	505	4	2784	1325
[OVER]	GO:0006464	cellular protein modification process	BIOLOGICAL_PROCESS	4.69242e-69	2.47703e-71	513	6	2776	1323
[OVER]	GO:0036211	protein modification process	BIOLOGICAL_PROCESS	4.69242e-69	2.47703e-71	513	6	2776	1323
[OVER]	GO:1901360	organic cyclic compound metabolic process	BIOLOGICAL_PROCESS	2.69375e-68	1.4516e-70	669	30	2620	1299
[OVER]	GO:0043168	anion binding	MOLECULAR_FUNCTION	1.32743e-67	7.29919e-70	551	12	2738	1317
[OVER]	GO:0006793	phosphorus metabolic process	BIOLOGICAL_PROCESS	4.64555e-66	2.65665e-68	511	8	2778	1321
[OVER]	GO:0006796	phosphate-containing compound metabolic process	BIOLOGICAL_PROCESS	4.64555e-66	2.65665e-68	511	8	2778	1321
[OVER]	GO:0009058	biosynthetic process	BIOLOGICAL_PROCESS	7.64723e-66	4.45731e-68	630	26	2659	1303
[OVER]	GO:0036094	small molecule binding	MOLECULAR_FUNCTION	1.5128e-65	8.98395e-68	538	12	2751	1317
[OVER]	GO:0051234	establishment of localization	BIOLOGICAL_PROCESS	8.21324e-65	4.96787e-67	511	9	2778	1320
[OVER]	GO:0006725	cellular aromatic compound metabolic process	BIOLOGICAL_PROCESS	1.22983e-64	7.574e-67	645	30	2644	1299
[OVER]	GO:1901576	organic substance biosynthetic process	BIOLOGICAL_PROCESS	1.77789e-64	1.11448e-66	621	26	2668	1303
[OVER]	GO:0046483	heterocycle metabolic process	BIOLOGICAL_PROCESS	3.4349e-64	2.19097e-66	642	30	2647	1299
[OVER]	GO:0032501	multicellular organismal process	BIOLOGICAL_PROCESS	1.06939e-63	6.93876e-66	442	2	2847	1327
[OVER]	GO:0044249	cellular biosynthetic process	BIOLOGICAL_PROCESS	8.45976e-63	5.58216e-65	610	26	2679	1303
[OVER]	GO:0010467	gene expression	BIOLOGICAL_PROCESS	1.4941e-62	1.00231e-64	526	13	2763	1316
[OVER]	GO:0006139	nucleobase-containing compound metabolic process	BIOLOGICAL_PROCESS	3.1421e-62	2.14242e-64	629	30	2660	1299
[OVER]	GO:0019222	regulation of metabolic process	BIOLOGICAL_PROCESS	3.62592e-62	2.51219e-64	594	24	2695	1305
[OVER]	GO:0006810	transport	BIOLOGICAL_PROCESS	3.81085e-62	2.68222e-64	494	9	2795	1320
[OVER]	GO:0140096	catalytic activity, acting on a protein	MOLECULAR_FUNCTION	5.04303e-60	3.60494e-62	448	5	2841	1324
[OVER]	GO:1901265	nucleoside phosphate binding	MOLECULAR_FUNCTION	7.66506e-60	5.64785e-62	487	10	2802	1319
[OVER]	GO:0000166	nucleotide binding	MOLECULAR_FUNCTION	7.66506e-60	5.64785e-62	487	10	2802	1319
[OVER]	GO:0060255	regulation of macromolecule metabolic process	BIOLOGICAL_PROCESS	2.35479e-58	1.76098e-60	563	23	2726	1306
[OVER]	GO:0043228	non-membrane-bounded organelle	CELLULAR_COMPONENT	5.41399e-58	4.16782e-60	452	7	2837	1322
[OVER]	GO:0043232	intracellular non-membrane-bounded organelle	CELLULAR_COMPONENT	5.41399e-58	4.16782e-60	452	7	2837	1322
[OVER]	GO:0032502	developmental process	BIOLOGICAL_PROCESS	2.05186e-57	1.60213e-59	403	2	2886	1327
[OVER]	GO:0031323	regulation of cellular metabolic process	BIOLOGICAL_PROCESS	2.61551e-57	2.07101e-59	550	22	2739	1307
[OVER]	GO:0097367	carbohydrate derivative binding	MOLECULAR_FUNCTION	4.12753e-57	3.31364e-59	462	9	2827	1320
[OVER]	GO:0003676	nucleic acid binding	MOLECULAR_FUNCTION	1.3183e-55	1.07285e-57	590	31	2699	1298
[OVER]	GO:0080090	regulation of primary metabolic process	BIOLOGICAL_PROCESS	1.67366e-55	1.38045e-57	538	22	2751	1307
[OVER]	GO:0090304	nucleic acid metabolic process	BIOLOGICAL_PROCESS	5.06367e-55	4.23225e-57	575	29	2714	1300
[OVER]	GO:0051171	regulation of nitrogen compound metabolic process	BIOLOGICAL_PROCESS	3.73562e-54	3.16334e-56	529	22	2760	1307
[OVER]	GO:0048856	anatomical structure development	BIOLOGICAL_PROCESS	1.40427e-53	1.20459e-55	379	2	2910	1327
[OVER]	GO:0032553	ribonucleotide binding	MOLECULAR_FUNCTION	6.67705e-53	5.80103e-55	435	9	2854	1320
[OVER]	GO:0017076	purine nucleotide binding	MOLECULAR_FUNCTION	1.35355e-52	1.19085e-54	433	9	2856	1320
[OVER]	GO:0032555	purine ribonucleotide binding	MOLECULAR_FUNCTION	1.91493e-52	1.70581e-54	432	9	2857	1320
[OVER]	GO:0009059	macromolecule biosynthetic process	BIOLOGICAL_PROCESS	8.48372e-52	7.65055e-54	519	23	2770	1306
[OVER]	GO:0035639	purine ribonucleoside triphosphate binding	MOLECULAR_FUNCTION	1.60903e-51	1.46871e-53	426	9	2863	1320
[OVER]	GO:0048518	positive regulation of biological process	BIOLOGICAL_PROCESS	1.84999e-51	1.70899e-53	418	8	2871	1321
[OVER]	GO:0034645	cellular macromolecule biosynthetic process	BIOLOGICAL_PROCESS	1.78101e-50	1.66486e-52	510	23	2779	1306
[OVER]	GO:0016070	RNA metabolic process	BIOLOGICAL_PROCESS	6.76967e-50	6.40263e-52	457	15	2832	1314
[OVER]	GO:0048522	positive regulation of cellular process	BIOLOGICAL_PROCESS	1.23108e-48	1.17787e-50	384	6	2905	1323
[OVER]	GO:0016310	phosphorylation	BIOLOGICAL_PROCESS	1.35108e-47	1.30754e-49	393	8	2896	1321
[OVER]	GO:0070013	intracellular organelle lumen	CELLULAR_COMPONENT	1.53427e-47	1.53546e-49	330	1	2959	1328
[OVER]	GO:0031974	membrane-enclosed lumen	CELLULAR_COMPONENT	1.53427e-47	1.53546e-49	330	1	2959	1328
[OVER]	GO:0043233	organelle lumen	CELLULAR_COMPONENT	1.53427e-47	1.53546e-49	330	1	2959	1328
[OVER]	GO:0048519	negative regulation of biological process	BIOLOGICAL_PROCESS	1.00219e-46	1.01398e-48	409	11	2880	1318
[OVER]	GO:0006996	organelle organization	BIOLOGICAL_PROCESS	1.58564e-46	1.62174e-48	362	5	2927	1324
[OVER]	GO:0007275	multicellular organism development	BIOLOGICAL_PROCESS	3.70877e-46	3.83399e-48	332	2	2957	1327
[OVER]	GO:0031981	nuclear lumen	CELLULAR_COMPONENT	3.23364e-44	3.37838e-46	309	1	2980	1328
[OVER]	GO:0044271	cellular nitrogen compound biosynthetic process	BIOLOGICAL_PROCESS	5.36966e-44	5.66906e-46	471	24	2818	1305
[OVER]	GO:0008144	drug binding	MOLECULAR_FUNCTION	4.11349e-43	4.38808e-45	378	10	2911	1319
[OVER]	GO:0071944	cell periphery	CELLULAR_COMPONENT	5.10827e-43	5.50545e-45	312	2	2977	1327
[OVER]	GO:0048523	negative regulation of cellular process	BIOLOGICAL_PROCESS	5.70608e-43	6.21249e-45	377	10	2912	1319
[OVER]	GO:0048731	system development	BIOLOGICAL_PROCESS	7.27055e-42	7.99577e-44	294	1	2995	1328
[OVER]	GO:0030554	adenyl nucleotide binding	MOLECULAR_FUNCTION	1.73573e-41	1.92795e-43	360	9	2929	1320
[OVER]	GO:0032559	adenyl ribonucleotide binding	MOLECULAR_FUNCTION	2.43264e-41	2.7288e-43	359	9	2930	1320
[OVER]	GO:0010468	regulation of gene expression	BIOLOGICAL_PROCESS	4.38102e-41	4.96256e-43	378	12	2911	1317
[OVER]	GO:0005886	plasma membrane	CELLULAR_COMPONENT	5.2858e-41	6.04556e-43	299	2	2990	1327
[OVER]	GO:0019219	regulation of nucleobase-containing compound metabolic process	BIOLOGICAL_PROCESS	1.85426e-40	2.14118e-42	367	11	2922	1318
[OVER]	GO:0005524	ATP binding	MOLECULAR_FUNCTION	1.87519e-40	2.18597e-42	353	9	2936	1320
[OVER]	GO:0009889	regulation of biosynthetic process	BIOLOGICAL_PROCESS	7.82559e-39	9.20861e-41	356	11	2933	1318
[OVER]	GO:0031326	regulation of cellular biosynthetic process	BIOLOGICAL_PROCESS	2.15417e-38	2.55857e-40	353	11	2936	1318
[OVER]	GO:0005654	nucleoplasm	CELLULAR_COMPONENT	7.78329e-38	9.33002e-40	256	0	3033	1329
[OVER]	GO:0010556	regulation of macromolecule biosynthetic process	BIOLOGICAL_PROCESS	1.62439e-37	1.96506e-39	347	11	2942	1318
[OVER]	GO:0048869	cellular developmental process	BIOLOGICAL_PROCESS	4.69547e-37	5.73186e-39	251	0	3038	1329
[OVER]	GO:0048583	regulation of response to stimulus	BIOLOGICAL_PROCESS	6.04695e-37	7.44812e-39	291	4	2998	1325
[OVER]	GO:0030154	cell differentiation	BIOLOGICAL_PROCESS	6.62943e-37	8.23848e-39	250	0	3039	1329
[OVER]	GO:0006468	protein phosphorylation	BIOLOGICAL_PROCESS	6.79655e-37	8.52091e-39	262	1	3027	1328
[OVER]	GO:0003677	DNA binding	MOLECULAR_FUNCTION	1.26912e-36	1.60507e-38	320	8	2969	1321
[OVER]	GO:2000112	regulation of cellular macromolecule biosynthetic process	BIOLOGICAL_PROCESS	2.30915e-36	2.94579e-38	339	11	2950	1318
[OVER]	GO:0051252	regulation of RNA metabolic process	BIOLOGICAL_PROCESS	3.20865e-36	4.12858e-38	338	11	2951	1318
[OVER]	GO:0042221	response to chemical	BIOLOGICAL_PROCESS	3.62989e-36	4.71051e-38	277	3	3012	1326
[OVER]	GO:0012505	endomembrane system	CELLULAR_COMPONENT	5.12841e-36	6.71154e-38	276	3	3013	1326
[OVER]	GO:0035556	intracellular signal transduction	BIOLOGICAL_PROCESS	5.58497e-36	7.37046e-38	256	1	3033	1328
[OVER]	GO:1901362	organic cyclic compound biosynthetic process	BIOLOGICAL_PROCESS	2.7471e-35	3.65555e-37	403	23	2886	1306
[OVER]	GO:0032774	RNA biosynthetic process	BIOLOGICAL_PROCESS	4.54834e-35	6.10246e-37	330	11	2959	1318
[OVER]	GO:0065008	regulation of biological quality	BIOLOGICAL_PROCESS	7.37653e-35	1.00593e-36	259	2	3030	1327
[OVER]	GO:0023051	regulation of signaling	BIOLOGICAL_PROCESS	7.37653e-35	1.00593e-36	259	2	3030	1327
[OVER]	GO:0010646	regulation of cell communication	BIOLOGICAL_PROCESS	1.48968e-34	2.04784e-36	257	2	3032	1327
[OVER]	GO:0097659	nucleic acid-templated transcription	BIOLOGICAL_PROCESS	2.35555e-34	3.26404e-36	325	11	2964	1318
[OVER]	GO:0006950	response to stress	BIOLOGICAL_PROCESS	2.96201e-34	4.13697e-36	273	4	3016	1325
[OVER]	GO:0016301	kinase activity	MOLECULAR_FUNCTION	7.54551e-34	1.06216e-35	301	8	2988	1321
[OVER]	GO:0019438	aromatic compound biosynthetic process	BIOLOGICAL_PROCESS	1.37358e-33	1.94866e-35	385	22	2904	1307
[OVER]	GO:0006351	transcription, DNA-templated	BIOLOGICAL_PROCESS	1.69635e-33	2.42522e-35	319	11	2970	1318
[OVER]	GO:0019899	enzyme binding	MOLECULAR_FUNCTION	2.33899e-33	3.36971e-35	227	0	3062	1329
[OVER]	GO:0018130	heterocycle biosynthetic process	BIOLOGICAL_PROCESS	5.43554e-33	7.89059e-35	386	23	2903	1306
[OVER]	GO:0044085	cellular component biogenesis	BIOLOGICAL_PROCESS	6.49631e-33	9.50192e-35	236	1	3053	1328
[OVER]	GO:0034654	nucleobase-containing compound biosynthetic process	BIOLOGICAL_PROCESS	8.79183e-33	1.29562e-34	379	22	2910	1307
[OVER]	GO:0033036	macromolecule localization	BIOLOGICAL_PROCESS	2.12273e-32	3.15153e-34	252	3	3037	1326
[OVER]	GO:1903506	regulation of nucleic acid-templated transcription	BIOLOGICAL_PROCESS	4.4794e-32	6.7489e-34	309	11	2980	1318
[OVER]	GO:2001141	regulation of RNA biosynthetic process	BIOLOGICAL_PROCESS	4.4794e-32	6.7489e-34	309	11	2980	1318
[OVER]	GO:0006355	regulation of transcription, DNA-templated	BIOLOGICAL_PROCESS	4.5055e-31	6.83777e-33	302	11	2987	1318
[OVER]	GO:0009966	regulation of signal transduction	BIOLOGICAL_PROCESS	4.5815e-31	7.0035e-33	234	2	3055	1327
[OVER]	GO:0009056	catabolic process	BIOLOGICAL_PROCESS	5.3261e-30	8.2003e-32	217	1	3072	1328
[OVER]	GO:0051641	cellular localization	BIOLOGICAL_PROCESS	1.06989e-29	1.65902e-31	225	2	3064	1327
[OVER]	GO:0005829	cytosol	CELLULAR_COMPONENT	1.19837e-29	1.87142e-31	203	0	3086	1329
[OVER]	GO:0022607	cellular component assembly	BIOLOGICAL_PROCESS	4.37031e-29	6.87292e-31	211	1	3078	1328
[OVER]	GO:0005856	cytoskeleton	CELLULAR_COMPONENT	4.91337e-29	7.78099e-31	238	4	3051	1325
[OVER]	GO:0009893	positive regulation of metabolic process	BIOLOGICAL_PROCESS	6.03072e-29	9.61678e-31	229	3	3060	1326
[OVER]	GO:0016772	transferase activity, transferring phosphorus-containing groups	MOLECULAR_FUNCTION	4.01367e-28	6.44447e-30	328	19	2961	1310
[OVER]	GO:0031325	positive regulation of cellular metabolic process	BIOLOGICAL_PROCESS	4.83822e-28	7.82161e-30	214	2	3075	1327
[OVER]	GO:0010604	positive regulation of macromolecule metabolic process	BIOLOGICAL_PROCESS	9.66538e-28	1.57316e-29	212	2	3077	1327
[OVER]	GO:0048513	animal organ development	BIOLOGICAL_PROCESS	1.43665e-27	2.35412e-29	201	1	3088	1328
[OVER]	GO:0007166	cell surface receptor signaling pathway	BIOLOGICAL_PROCESS	4.68502e-27	7.7285e-29	247	7	3042	1322
[OVER]	GO:0071702	organic substance transport	BIOLOGICAL_PROCESS	5.20908e-27	8.65028e-29	216	3	3073	1326
[OVER]	GO:0009653	anatomical structure morphogenesis	BIOLOGICAL_PROCESS	1.41536e-26	2.36594e-28	183	0	3106	1329
[OVER]	GO:0070887	cellular response to chemical stimulus	BIOLOGICAL_PROCESS	2.04146e-26	3.43498e-28	212	3	3077	1326
[OVER]	GO:0051173	positive regulation of nitrogen compound metabolic process	BIOLOGICAL_PROCESS	3.03147e-26	5.13414e-28	202	2	3087	1327
[OVER]	GO:0051239	regulation of multicellular organismal process	BIOLOGICAL_PROCESS	9.43776e-26	1.60877e-27	189	1	3100	1328
[OVER]	GO:0008104	protein localization	BIOLOGICAL_PROCESS	2.68868e-25	4.61272e-27	186	1	3103	1328
[OVER]	GO:1901566	organonitrogen compound biosynthetic process	BIOLOGICAL_PROCESS	3.38171e-25	5.83887e-27	195	2	3094	1327
[OVER]	GO:0032879	regulation of localization	BIOLOGICAL_PROCESS	5.35443e-25	9.30385e-27	184	1	3105	1328
[OVER]	GO:0044248	cellular catabolic process	BIOLOGICAL_PROCESS	1.07266e-24	1.87565e-26	182	1	3107	1328
[OVER]	GO:0050793	regulation of developmental process	BIOLOGICAL_PROCESS	1.36705e-24	2.40546e-26	170	0	3119	1329
[OVER]	GO:0046914	transition metal ion binding	MOLECULAR_FUNCTION	2.35999e-24	4.17858e-26	228	7	3061	1322
[OVER]	GO:0044281	small molecule metabolic process	BIOLOGICAL_PROCESS	5.22845e-24	9.31495e-26	187	2	3102	1327
[OVER]	GO:0006508	proteolysis	BIOLOGICAL_PROCESS	5.78478e-24	1.03697e-25	251	11	3038	1318
[OVER]	GO:0016773	phosphotransferase activity, alcohol group as acceptor	MOLECULAR_FUNCTION	5.98799e-24	1.07999e-25	177	1	3112	1328
[OVER]	GO:0006928	movement of cell or subcellular component	BIOLOGICAL_PROCESS	7.25215e-24	1.31596e-25	186	2	3103	1327
[OVER]	GO:0033554	cellular response to stress	BIOLOGICAL_PROCESS	1.01822e-23	1.85883e-25	185	2	3104	1327
[OVER]	GO:1901575	organic substance catabolic process	BIOLOGICAL_PROCESS	1.1834e-23	2.1734e-25	175	1	3114	1328
[OVER]	GO:0016817	hydrolase activity, acting on acid anhydrides	MOLECULAR_FUNCTION	1.9946e-23	3.70711e-25	183	2	3106	1327
[OVER]	GO:0016818	hydrolase activity, acting on acid anhydrides, in phosphorus-containing anhydrides	MOLECULAR_FUNCTION	1.9946e-23	3.70711e-25	183	2	3106	1327
[OVER]	GO:0016462	pyrophosphatase activity	MOLECULAR_FUNCTION	2.79957e-23	5.23399e-25	182	2	3107	1327
[OVER]	GO:0031090	organelle membrane	CELLULAR_COMPONENT	6.625e-23	1.24588e-24	170	1	3119	1328
[OVER]	GO:0048468	cell development	BIOLOGICAL_PROCESS	8.88003e-23	1.68948e-24	158	0	3131	1329
[OVER]	GO:0008219	cell death	BIOLOGICAL_PROCESS	8.88003e-23	1.68948e-24	158	0	3131	1329
[OVER]	GO:0051649	establishment of localization in cell	BIOLOGICAL_PROCESS	9.22852e-23	1.76593e-24	169	1	3120	1328
[OVER]	GO:0017111	nucleoside-triphosphatase activity	MOLECULAR_FUNCTION	1.079e-22	2.0766e-24	178	2	3111	1327
[OVER]	GO:0010033	response to organic substance	BIOLOGICAL_PROCESS	2.56424e-22	4.96324e-24	184	3	3105	1326
[OVER]	GO:0007049	cell cycle	BIOLOGICAL_PROCESS	3.58071e-22	6.97004e-24	183	3	3106	1326
[OVER]	GO:0004672	protein kinase activity	MOLECULAR_FUNCTION	1.03318e-21	2.02251e-23	162	1	3127	1328
[OVER]	GO:0051128	regulation of cellular component organization	BIOLOGICAL_PROCESS	1.64803e-21	3.24423e-23	170	2	3119	1327
[OVER]	GO:0009892	negative regulation of metabolic process	BIOLOGICAL_PROCESS	2.07755e-21	4.1126e-23	226	10	3063	1319
[OVER]	GO:0055085	transmembrane transport	BIOLOGICAL_PROCESS	2.76723e-21	5.50829e-23	206	7	3083	1322
[OVER]	GO:0003723	RNA binding	MOLECULAR_FUNCTION	3.53363e-21	7.0727e-23	184	4	3105	1325
[OVER]	GO:0005215	transporter activity	MOLECULAR_FUNCTION	7.22367e-21	1.45379e-22	203	7	3086	1322
[OVER]	GO:2000026	regulation of multicellular organismal development	BIOLOGICAL_PROCESS	1.17068e-20	2.36892e-22	144	0	3145	1329
[OVER]	GO:0051246	regulation of protein metabolic process	BIOLOGICAL_PROCESS	1.32593e-20	2.69764e-22	226	11	3063	1318
[OVER]	GO:0040011	locomotion	BIOLOGICAL_PROCESS	3.18374e-20	6.51244e-22	152	1	3137	1328
[OVER]	GO:0005509	calcium ion binding	MOLECULAR_FUNCTION	8.94997e-20	1.84059e-21	149	1	3140	1328
[OVER]	GO:0008233	peptidase activity	MOLECULAR_FUNCTION	9.50204e-20	1.96457e-21	158	2	3131	1327
[OVER]	GO:0012501	programmed cell death	BIOLOGICAL_PROCESS	1.34022e-19	2.78567e-21	137	0	3152	1329
[OVER]	GO:0008270	zinc ion binding	MOLECULAR_FUNCTION	1.83869e-19	3.84197e-21	172	4	3117	1325
[OVER]	GO:0007399	nervous system development	BIOLOGICAL_PROCESS	1.88518e-19	3.95984e-21	136	0	3153	1329
[OVER]	GO:0071705	nitrogen compound transport	BIOLOGICAL_PROCESS	2.46057e-19	5.19553e-21	146	1	3143	1328
[OVER]	GO:0051174	regulation of phosphorus metabolic process	BIOLOGICAL_PROCESS	2.6381e-19	5.6284e-21	135	0	3154	1329
[OVER]	GO:0019220	regulation of phosphate metabolic process	BIOLOGICAL_PROCESS	2.6381e-19	5.6284e-21	135	0	3154	1329
[OVER]	GO:0065009	regulation of molecular function	BIOLOGICAL_PROCESS	2.93261e-19	6.28901e-21	254	18	3035	1311
[OVER]	GO:0007010	cytoskeleton organization	BIOLOGICAL_PROCESS	3.38825e-19	7.34064e-21	145	1	3144	1328
[OVER]	GO:0070727	cellular macromolecule localization	BIOLOGICAL_PROCESS	3.38825e-19	7.34064e-21	145	1	3144	1328
[OVER]	GO:0034613	cellular protein localization	BIOLOGICAL_PROCESS	4.76233e-19	1.037e-20	144	1	3145	1328
[OVER]	GO:0032268	regulation of cellular protein metabolic process	BIOLOGICAL_PROCESS	5.03602e-19	1.10213e-20	214	11	3075	1318
[OVER]	GO:1902531	regulation of intracellular signal transduction	BIOLOGICAL_PROCESS	5.12563e-19	1.13678e-20	133	0	3156	1329
[OVER]	GO:0031324	negative regulation of cellular metabolic process	BIOLOGICAL_PROCESS	5.12563e-19	1.13865e-20	202	9	3087	1320
[OVER]	GO:0006915	apoptotic process	BIOLOGICAL_PROCESS	5.12563e-19	1.13678e-20	133	0	3156	1329
[OVER]	GO:0006366	transcription by RNA polymerase II	BIOLOGICAL_PROCESS	7.23557e-19	1.61533e-20	132	0	3157	1329
[OVER]	GO:0010605	negative regulation of macromolecule metabolic process	BIOLOGICAL_PROCESS	9.49118e-19	2.12933e-20	206	10	3083	1319
[OVER]	GO:0071310	cellular response to organic substance	BIOLOGICAL_PROCESS	1.0113e-18	2.27995e-20	159	3	3130	1326
[OVER]	GO:0006811	ion transport	BIOLOGICAL_PROCESS	1.23511e-18	2.79812e-20	166	4	3123	1325
[OVER]	GO:0009888	tissue development	BIOLOGICAL_PROCESS	1.43234e-18	3.26068e-20	130	0	3159	1329
[OVER]	GO:0010941	regulation of cell death	BIOLOGICAL_PROCESS	2.02495e-18	4.63203e-20	129	0	3160	1329
[OVER]	GO:0055114	oxidation-reduction process	BIOLOGICAL_PROCESS	2.26022e-18	5.19505e-20	191	8	3098	1321
[OVER]	GO:0009605	response to external stimulus	BIOLOGICAL_PROCESS	3.55825e-18	8.21767e-20	138	1	3151	1328
[OVER]	GO:0048870	cell motility	BIOLOGICAL_PROCESS	4.97429e-18	1.15974e-19	137	1	3152	1328
[OVER]	GO:0051674	localization of cell	BIOLOGICAL_PROCESS	4.97429e-18	1.15974e-19	137	1	3152	1328
[OVER]	GO:0006357	regulation of transcription by RNA polymerase II	BIOLOGICAL_PROCESS	8.0453e-18	1.88458e-19	125	0	3164	1329
[OVER]	GO:0015630	microtubule cytoskeleton	CELLULAR_COMPONENT	9.70833e-18	2.28482e-19	144	2	3145	1327
[OVER]	GO:1902494	catalytic complex	CELLULAR_COMPONENT	1.6068e-17	3.79921e-19	123	0	3166	1329
[OVER]	GO:0022857	transmembrane transporter activity	MOLECULAR_FUNCTION	1.81303e-17	4.30677e-19	178	7	3111	1322
[OVER]	GO:0031399	regulation of protein modification process	BIOLOGICAL_PROCESS	1.88332e-17	4.49444e-19	142	2	3147	1327
[OVER]	GO:0042802	identical protein binding	MOLECULAR_FUNCTION	2.24969e-17	5.39351e-19	122	0	3167	1329
[OVER]	GO:0016192	vesicle-mediated transport	BIOLOGICAL_PROCESS	3.17886e-17	7.65612e-19	121	0	3168	1329
[OVER]	GO:0051172	negative regulation of nitrogen compound metabolic process	BIOLOGICAL_PROCESS	3.65468e-17	8.8423e-19	188	9	3101	1320
[OVER]	GO:0045184	establishment of protein localization	BIOLOGICAL_PROCESS	3.75848e-17	9.13475e-19	131	1	3158	1328
[OVER]	GO:0008092	cytoskeletal protein binding	MOLECULAR_FUNCTION	4.2717e-17	1.04291e-18	155	4	3134	1325
[OVER]	GO:0070011	peptidase activity, acting on L-amino acid peptides	MOLECULAR_FUNCTION	5.04895e-17	1.23822e-18	139	2	3150	1327
[OVER]	GO:0046907	intracellular transport	BIOLOGICAL_PROCESS	7.36921e-17	1.81536e-18	129	1	3160	1328
[OVER]	GO:0042325	regulation of phosphorylation	BIOLOGICAL_PROCESS	1.2551e-16	3.10567e-18	117	0	3172	1329
[OVER]	GO:0140110	transcription regulator activity	MOLECULAR_FUNCTION	1.35922e-16	3.37826e-18	144	3	3145	1326
[OVER]	GO:0045935	positive regulation of nucleobase-containing compound metabolic process	BIOLOGICAL_PROCESS	1.76511e-16	4.40647e-18	116	0	3173	1329
[OVER]	GO:0016477	cell migration	BIOLOGICAL_PROCESS	2.01715e-16	5.08004e-18	126	1	3163	1328
[OVER]	GO:0042886	amide transport	BIOLOGICAL_PROCESS	2.01715e-16	5.08004e-18	126	1	3163	1328
[OVER]	GO:0043067	regulation of programmed cell death	BIOLOGICAL_PROCESS	2.47152e-16	6.25152e-18	115	0	3174	1329
[OVER]	GO:0008283	cell population proliferation	BIOLOGICAL_PROCESS	2.62881e-16	6.67826e-18	134	2	3155	1327
[OVER]	GO:0015833	peptide transport	BIOLOGICAL_PROCESS	2.80493e-16	7.15654e-18	125	1	3164	1328
[OVER]	GO:0048585	negative regulation of response to stimulus	BIOLOGICAL_PROCESS	3.44613e-16	8.86829e-18	114	0	3175	1329
[OVER]	GO:0042981	regulation of apoptotic process	BIOLOGICAL_PROCESS	3.44613e-16	8.86829e-18	114	0	3175	1329
[OVER]	GO:0015031	protein transport	BIOLOGICAL_PROCESS	3.90042e-16	1.00803e-17	124	1	3165	1328
[OVER]	GO:0001932	regulation of protein phosphorylation	BIOLOGICAL_PROCESS	4.80601e-16	1.25792e-17	113	0	3176	1329
[OVER]	GO:0042995	cell projection	CELLULAR_COMPONENT	4.80601e-16	1.25792e-17	113	0	3176	1329
[OVER]	GO:0045595	regulation of cell differentiation	BIOLOGICAL_PROCESS	4.80601e-16	1.25792e-17	113	0	3176	1329
[OVER]	GO:0006629	lipid metabolic process	BIOLOGICAL_PROCESS	4.97873e-16	1.30861e-17	132	2	3157	1327
[OVER]	GO:0048584	positive regulation of response to stimulus	BIOLOGICAL_PROCESS	5.38699e-16	1.42184e-17	147	4	3142	1325
[OVER]	GO:0030054	cell junction	CELLULAR_COMPONENT	6.70379e-16	1.78414e-17	112	0	3177	1329
[OVER]	GO:0120025	plasma membrane bounded cell projection	CELLULAR_COMPONENT	6.70379e-16	1.78414e-17	112	0	3177	1329
[OVER]	GO:0009891	positive regulation of biosynthetic process	BIOLOGICAL_PROCESS	9.4681e-16	2.53024e-17	111	0	3178	1329
[OVER]	GO:0023056	positive regulation of signaling	BIOLOGICAL_PROCESS	9.54821e-16	2.56215e-17	130	2	3159	1327
[OVER]	GO:0010629	negative regulation of gene expression	BIOLOGICAL_PROCESS	1.04452e-15	2.81433e-17	121	1	3168	1328
[OVER]	GO:0010647	positive regulation of cell communication	BIOLOGICAL_PROCESS	1.32477e-15	3.58401e-17	129	2	3160	1327
[OVER]	GO:0098772	molecular function regulator	MOLECULAR_FUNCTION	1.64469e-15	4.4676e-17	218	17	3071	1312
[OVER]	GO:0016491	oxidoreductase activity	MOLECULAR_FUNCTION	1.79504e-15	4.89575e-17	169	8	3120	1321
[OVER]	GO:0031328	positive regulation of cellular biosynthetic process	BIOLOGICAL_PROCESS	1.84307e-15	5.08755e-17	109	0	3180	1329
[OVER]	GO:0005794	Golgi apparatus	CELLULAR_COMPONENT	1.84307e-15	5.08755e-17	109	0	3180	1329
[OVER]	GO:0043933	protein-containing complex subunit organization	BIOLOGICAL_PROCESS	1.84307e-15	5.08755e-17	109	0	3180	1329
[OVER]	GO:0044093	positive regulation of molecular function	BIOLOGICAL_PROCESS	2.1493e-15	5.95649e-17	156	6	3133	1323
[OVER]	GO:0010557	positive regulation of macromolecule biosynthetic process	BIOLOGICAL_PROCESS	2.59244e-15	7.21309e-17	108	0	3181	1329
[OVER]	GO:0009057	macromolecule catabolic process	BIOLOGICAL_PROCESS	2.80888e-15	7.84622e-17	118	1	3171	1328
[OVER]	GO:0099080	supramolecular complex	CELLULAR_COMPONENT	3.64637e-15	1.02257e-16	107	0	3182	1329
[OVER]	GO:0016788	hydrolase activity, acting on ester bonds	MOLECULAR_FUNCTION	4.63191e-15	1.30405e-16	147	5	3142	1324
[OVER]	GO:0051276	chromosome organization	BIOLOGICAL_PROCESS	6.2803e-15	1.77503e-16	132	3	3157	1326
[OVER]	GO:0010628	positive regulation of gene expression	BIOLOGICAL_PROCESS	7.24113e-15	2.05456e-16	105	0	3184	1329
[OVER]	GO:0005694	chromosome	CELLULAR_COMPONENT	7.66875e-15	2.18432e-16	115	1	3174	1328
[OVER]	GO:0050790	regulation of catalytic activity	BIOLOGICAL_PROCESS	8.19702e-15	2.34381e-16	217	18	3072	1311
[OVER]	GO:0022008	neurogenesis	BIOLOGICAL_PROCESS	1.01059e-14	2.91186e-16	104	0	3185	1329
[OVER]	GO:0009890	negative regulation of biosynthetic process	BIOLOGICAL_PROCESS	1.01059e-14	2.91186e-16	104	0	3185	1329
[OVER]	GO:0007267	cell-cell signaling	BIOLOGICAL_PROCESS	1.42671e-14	4.12651e-16	103	0	3186	1329
[OVER]	GO:0043603	cellular amide metabolic process	BIOLOGICAL_PROCESS	1.48766e-14	4.31916e-16	113	1	3176	1328
[OVER]	GO:1901135	carbohydrate derivative metabolic process	BIOLOGICAL_PROCESS	1.99136e-14	5.84729e-16	102	0	3187	1329
[OVER]	GO:0031327	negative regulation of cellular biosynthetic process	BIOLOGICAL_PROCESS	1.99136e-14	5.84729e-16	102	0	3187	1329
[OVER]	GO:1901565	organonitrogen compound catabolic process	BIOLOGICAL_PROCESS	1.99136e-14	5.84729e-16	102	0	3187	1329
[OVER]	GO:0019637	organophosphate metabolic process	BIOLOGICAL_PROCESS	2.80054e-14	8.28489e-16	101	0	3188	1329
[OVER]	GO:0045934	negative regulation of nucleobase-containing compound metabolic process	BIOLOGICAL_PROCESS	2.80054e-14	8.28489e-16	101	0	3188	1329
[OVER]	GO:0022402	cell cycle process	BIOLOGICAL_PROCESS	3.08197e-14	9.15134e-16	127	3	3162	1326
[OVER]	GO:0042127	regulation of cell population proliferation	BIOLOGICAL_PROCESS	4.75807e-14	1.41805e-15	118	2	3171	1327
[OVER]	GO:0006974	cellular response to DNA damage stimulus	BIOLOGICAL_PROCESS	6.58983e-14	1.97847e-15	117	2	3172	1327
[OVER]	GO:0009967	positive regulation of signal transduction	BIOLOGICAL_PROCESS	6.58983e-14	1.97847e-15	117	2	3172	1327
[OVER]	GO:0030030	cell projection organization	BIOLOGICAL_PROCESS	7.70378e-14	2.35527e-15	98	0	3191	1329
[OVER]	GO:0120036	plasma membrane bounded cell projection organization	BIOLOGICAL_PROCESS	7.70378e-14	2.35527e-15	98	0	3191	1329
[OVER]	GO:0048699	generation of neurons	BIOLOGICAL_PROCESS	7.70378e-14	2.35527e-15	98	0	3191	1329
[OVER]	GO:0051254	positive regulation of RNA metabolic process	BIOLOGICAL_PROCESS	7.70378e-14	2.35527e-15	98	0	3191	1329
[OVER]	GO:0010558	negative regulation of macromolecule biosynthetic process	BIOLOGICAL_PROCESS	7.70378e-14	2.35527e-15	98	0	3191	1329
[OVER]	GO:0098796	membrane protein complex	CELLULAR_COMPONENT	1.07948e-13	3.3359e-15	97	0	3192	1329
[OVER]	GO:0009719	response to endogenous stimulus	BIOLOGICAL_PROCESS	1.07948e-13	3.32577e-15	107	1	3182	1328
[OVER]	GO:0051049	regulation of transport	BIOLOGICAL_PROCESS	1.07948e-13	3.3359e-15	97	0	3192	1329
[OVER]	GO:0005102	signaling receptor binding	MOLECULAR_FUNCTION	1.24097e-13	3.8486e-15	115	2	3174	1327
[OVER]	GO:0043565	sequence-specific DNA binding	MOLECULAR_FUNCTION	1.50588e-13	4.68671e-15	122	3	3167	1326
[OVER]	GO:0065003	protein-containing complex assembly	BIOLOGICAL_PROCESS	1.50733e-13	4.72438e-15	96	0	3193	1329
[OVER]	GO:0006396	RNA processing	BIOLOGICAL_PROCESS	1.50733e-13	4.72438e-15	96	0	3193	1329
[OVER]	GO:0042592	homeostatic process	BIOLOGICAL_PROCESS	1.706e-13	5.36584e-15	114	2	3175	1327
[OVER]	GO:2000113	negative regulation of cellular macromolecule biosynthetic process	BIOLOGICAL_PROCESS	2.09771e-13	6.69016e-15	95	0	3194	1329
[OVER]	GO:1903508	positive regulation of nucleic acid-templated transcription	BIOLOGICAL_PROCESS	2.09771e-13	6.69016e-15	95	0	3194	1329
[OVER]	GO:1902680	positive regulation of RNA biosynthetic process	BIOLOGICAL_PROCESS	2.09771e-13	6.69016e-15	95	0	3194	1329
[OVER]	GO:0080134	regulation of response to stress	BIOLOGICAL_PROCESS	2.09771e-13	6.69016e-15	95	0	3194	1329
[OVER]	GO:0005739	mitochondrion	CELLULAR_COMPONENT	2.86714e-13	9.20714e-15	104	1	3185	1328
[OVER]	GO:0007017	microtubule-based process	BIOLOGICAL_PROCESS	2.86714e-13	9.20714e-15	104	1	3185	1328
[OVER]	GO:1901700	response to oxygen-containing compound	BIOLOGICAL_PROCESS	2.93987e-13	9.47301e-15	94	0	3195	1329
[OVER]	GO:0022610	biological adhesion	BIOLOGICAL_PROCESS	3.2128e-13	1.04231e-14	112	2	3177	1327
[OVER]	GO:0007155	cell adhesion	BIOLOGICAL_PROCESS	3.2128e-13	1.04231e-14	112	2	3177	1327
[OVER]	GO:0004674	protein serine/threonine kinase activity	MOLECULAR_FUNCTION	3.97005e-13	1.29235e-14	103	1	3186	1328
[OVER]	GO:0043604	amide biosynthetic process	BIOLOGICAL_PROCESS	5.55276e-13	1.81367e-14	102	1	3187	1328
[OVER]	GO:0016887	ATPase activity	MOLECULAR_FUNCTION	5.75517e-13	1.89877e-14	92	0	3197	1329
[OVER]	GO:0051253	negative regulation of RNA metabolic process	BIOLOGICAL_PROCESS	5.75517e-13	1.89877e-14	92	0	3197	1329
[OVER]	GO:0051020	GTPase binding	MOLECULAR_FUNCTION	5.75517e-13	1.89877e-14	92	0	3197	1329
[OVER]	GO:0051726	regulation of cell cycle	BIOLOGICAL_PROCESS	6.11056e-13	2.02274e-14	110	2	3179	1327
[OVER]	GO:0044265	cellular macromolecule catabolic process	BIOLOGICAL_PROCESS	7.66226e-13	2.54482e-14	101	1	3188	1328
[OVER]	GO:0071495	cellular response to endogenous stimulus	BIOLOGICAL_PROCESS	1.07137e-12	3.57006e-14	100	1	3189	1328
[OVER]	GO:0023057	negative regulation of signaling	BIOLOGICAL_PROCESS	1.13797e-12	3.80449e-14	90	0	3199	1329
[OVER]	GO:0051247	positive regulation of protein metabolic process	BIOLOGICAL_PROCESS	1.16913e-12	3.92152e-14	108	2	3181	1327
[OVER]	GO:0018193	peptidyl-amino acid modification	BIOLOGICAL_PROCESS	1.3547e-12	4.55887e-14	115	3	3174	1326
[OVER]	GO:0010648	negative regulation of cell communication	BIOLOGICAL_PROCESS	1.59484e-12	5.38454e-14	89	0	3200	1329
[OVER]	GO:0060089	molecular transducer activity	MOLECULAR_FUNCTION	1.64722e-12	5.59761e-14	140	7	3149	1322
[OVER]	GO:0038023	signaling receptor activity	MOLECULAR_FUNCTION	1.64722e-12	5.59761e-14	140	7	3149	1322
[OVER]	GO:0046983	protein dimerization activity	MOLECULAR_FUNCTION	2.23515e-12	7.62011e-14	88	0	3201	1329
[OVER]	GO:0051241	negative regulation of multicellular organismal process	BIOLOGICAL_PROCESS	3.15268e-12	1.07829e-13	87	0	3202	1329
[OVER]	GO:0005198	structural molecule activity	MOLECULAR_FUNCTION	4.02244e-12	1.38018e-13	96	1	3193	1328
[OVER]	GO:0031982	vesicle	CELLULAR_COMPONENT	4.26897e-12	1.46947e-13	104	2	3185	1327
[OVER]	GO:0009968	negative regulation of signal transduction	BIOLOGICAL_PROCESS	4.41819e-12	1.52569e-13	86	0	3203	1329
[OVER]	GO:0003700	DNA-binding transcription factor activity	MOLECULAR_FUNCTION	4.79691e-12	1.66175e-13	111	3	3178	1326
[OVER]	GO:0098588	bounding membrane of organelle	CELLULAR_COMPONENT	5.56627e-12	1.93439e-13	95	1	3194	1328
[OVER]	GO:0032270	positive regulation of cellular protein metabolic process	BIOLOGICAL_PROCESS	5.86074e-12	2.04317e-13	103	2	3186	1327
[OVER]	GO:0051094	positive regulation of developmental process	BIOLOGICAL_PROCESS	6.1722e-12	2.15854e-13	85	0	3204	1329
[OVER]	GO:0048037	cofactor binding	MOLECULAR_FUNCTION	6.53986e-12	2.29431e-13	110	3	3179	1326
[OVER]	GO:0051240	positive regulation of multicellular organismal process	BIOLOGICAL_PROCESS	7.70238e-12	2.71061e-13	94	1	3195	1328
[OVER]	GO:0031410	cytoplasmic vesicle	CELLULAR_COMPONENT	7.99534e-12	2.84009e-13	102	2	3187	1327
[OVER]	GO:0097708	intracellular vesicle	CELLULAR_COMPONENT	7.99534e-12	2.84009e-13	102	2	3187	1327
[OVER]	GO:0070647	protein modification by small protein conjugation or removal	BIOLOGICAL_PROCESS	7.99534e-12	2.84009e-13	102	2	3187	1327
[OVER]	GO:0030182	neuron differentiation	BIOLOGICAL_PROCESS	8.54353e-12	3.05361e-13	84	0	3205	1329
[OVER]	GO:0051093	negative regulation of developmental process	BIOLOGICAL_PROCESS	8.54353e-12	3.05361e-13	84	0	3205	1329
[OVER]	GO:0000278	mitotic cell cycle	BIOLOGICAL_PROCESS	1.10086e-11	3.94678e-13	101	2	3188	1327
[OVER]	GO:0045893	positive regulation of transcription, DNA-templated	BIOLOGICAL_PROCESS	1.20112e-11	4.31944e-13	83	0	3206	1329
[OVER]	GO:0043085	positive regulation of catalytic activity	BIOLOGICAL_PROCESS	1.32913e-11	4.79441e-13	127	6	3162	1323
[OVER]	GO:0005783	endoplasmic reticulum	CELLULAR_COMPONENT	2.05888e-11	7.44937e-13	91	1	3198	1328
[OVER]	GO:1903507	negative regulation of nucleic acid-templated transcription	BIOLOGICAL_PROCESS	2.35938e-11	8.64044e-13	81	0	3208	1329
[OVER]	GO:0030163	protein catabolic process	BIOLOGICAL_PROCESS	2.35938e-11	8.64044e-13	81	0	3208	1329
[OVER]	GO:1902679	negative regulation of RNA biosynthetic process	BIOLOGICAL_PROCESS	2.35938e-11	8.64044e-13	81	0	3208	1329
[OVER]	GO:0060429	epithelium development	BIOLOGICAL_PROCESS	2.35938e-11	8.64044e-13	81	0	3208	1329
[OVER]	GO:0006518	peptide metabolic process	BIOLOGICAL_PROCESS	2.83959e-11	1.04302e-12	90	1	3199	1328
[OVER]	GO:0000902	cell morphogenesis	BIOLOGICAL_PROCESS	3.3166e-11	1.22189e-12	80	0	3209	1329
[OVER]	GO:0003690	double-stranded DNA binding	MOLECULAR_FUNCTION	4.64811e-11	1.72777e-12	79	0	3210	1329
[OVER]	GO:0007167	enzyme linked receptor protein signaling pathway	BIOLOGICAL_PROCESS	4.64811e-11	1.72777e-12	79	0	3210	1329
[OVER]	GO:0045892	negative regulation of transcription, DNA-templated	BIOLOGICAL_PROCESS	4.64811e-11	1.72777e-12	79	0	3210	1329
[OVER]	GO:0006082	organic acid metabolic process	BIOLOGICAL_PROCESS	1.05127e-10	3.9193e-12	94	2	3195	1327
[OVER]	GO:0043043	peptide biosynthetic process	BIOLOGICAL_PROCESS	1.06983e-10	4.00026e-12	86	1	3203	1328
[OVER]	GO:0030029	actin filament-based process	BIOLOGICAL_PROCESS	1.28305e-10	4.88218e-12	76	0	3213	1329
[OVER]	GO:0070925	organelle assembly	BIOLOGICAL_PROCESS	1.28305e-10	4.88218e-12	76	0	3213	1329
[OVER]	GO:0016311	dephosphorylation	BIOLOGICAL_PROCESS	1.28305e-10	4.88218e-12	76	0	3213	1329
[OVER]	GO:0042578	phosphoric ester hydrolase activity	MOLECULAR_FUNCTION	1.28305e-10	4.88218e-12	76	0	3213	1329
[OVER]	GO:0099081	supramolecular polymer	CELLULAR_COMPONENT	1.28305e-10	4.88218e-12	76	0	3213	1329
[OVER]	GO:0099512	supramolecular fiber	CELLULAR_COMPONENT	1.28305e-10	4.88218e-12	76	0	3213	1329
[OVER]	GO:0043436	oxoacid metabolic process	BIOLOGICAL_PROCESS	1.42398e-10	5.43408e-12	93	2	3196	1327
[OVER]	GO:0006412	translation	BIOLOGICAL_PROCESS	1.45776e-10	5.59506e-12	85	1	3204	1328
[OVER]	GO:0005815	microtubule organizing center	CELLULAR_COMPONENT	1.45776e-10	5.59506e-12	85	1	3204	1328
[OVER]	GO:0001882	nucleoside binding	MOLECULAR_FUNCTION	1.79287e-10	6.90097e-12	75	0	3214	1329
[OVER]	GO:0004888	transmembrane signaling receptor activity	MOLECULAR_FUNCTION	1.91251e-10	7.40352e-12	112	5	3177	1324
[OVER]	GO:0002376	immune system process	BIOLOGICAL_PROCESS	1.91251e-10	7.40352e-12	112	5	3177	1324
[OVER]	GO:0044255	cellular lipid metabolic process	BIOLOGICAL_PROCESS	1.94018e-10	7.53201e-12	92	2	3197	1327
[OVER]	GO:0006886	intracellular protein transport	BIOLOGICAL_PROCESS	2.00969e-10	7.82395e-12	84	1	3205	1328
[OVER]	GO:1902533	positive regulation of intracellular signal transduction	BIOLOGICAL_PROCESS	2.45e-10	9.75366e-12	74	0	3215	1329
[OVER]	GO:0001883	purine nucleoside binding	MOLECULAR_FUNCTION	2.45e-10	9.75366e-12	74	0	3215	1329
[OVER]	GO:0072359	circulatory system development	BIOLOGICAL_PROCESS	2.45e-10	9.75366e-12	74	0	3215	1329
[OVER]	GO:0005525	GTP binding	MOLECULAR_FUNCTION	2.45e-10	9.75366e-12	74	0	3215	1329
[OVER]	GO:0019001	guanyl nucleotide binding	MOLECULAR_FUNCTION	2.45e-10	9.75366e-12	74	0	3215	1329
[OVER]	GO:0032561	guanyl ribonucleotide binding	MOLECULAR_FUNCTION	2.45e-10	9.75366e-12	74	0	3215	1329
[OVER]	GO:0032550	purine ribonucleoside binding	MOLECULAR_FUNCTION	2.45e-10	9.75366e-12	74	0	3215	1329
[OVER]	GO:0032549	ribonucleoside binding	MOLECULAR_FUNCTION	2.45e-10	9.75366e-12	74	0	3215	1329
[OVER]	GO:0003008	system process	BIOLOGICAL_PROCESS	2.74e-10	1.09383e-11	83	1	3206	1328
[OVER]	GO:0060341	regulation of cellular localization	BIOLOGICAL_PROCESS	3.434e-10	1.37843e-11	73	0	3216	1329
[OVER]	GO:1901701	cellular response to oxygen-containing compound	BIOLOGICAL_PROCESS	3.434e-10	1.37843e-11	73	0	3216	1329
[OVER]	GO:0040012	regulation of locomotion	BIOLOGICAL_PROCESS	3.78808e-10	1.52889e-11	82	1	3207	1328
[OVER]	GO:0051270	regulation of cellular component movement	BIOLOGICAL_PROCESS	3.78808e-10	1.52889e-11	82	1	3207	1328
[OVER]	GO:0043549	regulation of kinase activity	BIOLOGICAL_PROCESS	4.76133e-10	1.94789e-11	72	0	3217	1329
[OVER]	GO:1901137	carbohydrate derivative biosynthetic process	BIOLOGICAL_PROCESS	4.76133e-10	1.94789e-11	72	0	3217	1329
[OVER]	GO:0048646	anatomical structure formation involved in morphogenesis	BIOLOGICAL_PROCESS	4.76133e-10	1.94789e-11	72	0	3217	1329
[OVER]	GO:0040007	growth	BIOLOGICAL_PROCESS	4.76133e-10	1.94789e-11	72	0	3217	1329
[OVER]	GO:0045859	regulation of protein kinase activity	BIOLOGICAL_PROCESS	4.76133e-10	1.94789e-11	72	0	3217	1329
[OVER]	GO:0044877	protein-containing complex binding	MOLECULAR_FUNCTION	4.92305e-10	2.02488e-11	96	3	3193	1326
[OVER]	GO:0034220	ion transmembrane transport	BIOLOGICAL_PROCESS	4.92305e-10	2.02488e-11	96	3	3193	1326
[OVER]	GO:0030036	actin cytoskeleton organization	BIOLOGICAL_PROCESS	6.56878e-10	2.75234e-11	71	0	3218	1329
[OVER]	GO:0022603	regulation of anatomical structure morphogenesis	BIOLOGICAL_PROCESS	6.56878e-10	2.75234e-11	71	0	3218	1329
[OVER]	GO:0010562	positive regulation of phosphorus metabolic process	BIOLOGICAL_PROCESS	6.56878e-10	2.75234e-11	71	0	3218	1329
[OVER]	GO:0045937	positive regulation of phosphate metabolic process	BIOLOGICAL_PROCESS	6.56878e-10	2.75234e-11	71	0	3218	1329
[OVER]	GO:0031226	intrinsic component of plasma membrane	CELLULAR_COMPONENT	6.56878e-10	2.75234e-11	71	0	3218	1329
[OVER]	GO:0046903	secretion	BIOLOGICAL_PROCESS	6.56878e-10	2.75234e-11	71	0	3218	1329
[OVER]	GO:0044257	cellular protein catabolic process	BIOLOGICAL_PROCESS	6.56878e-10	2.75234e-11	71	0	3218	1329
[OVER]	GO:2000145	regulation of cell motility	BIOLOGICAL_PROCESS	7.10521e-10	2.98492e-11	80	1	3209	1328
[OVER]	GO:0051336	regulation of hydrolase activity	BIOLOGICAL_PROCESS	8.9292e-10	3.76101e-11	144	12	3145	1317
[OVER]	GO:0019752	carboxylic acid metabolic process	BIOLOGICAL_PROCESS	9.08161e-10	3.83519e-11	87	2	3202	1327
[OVER]	GO:0042327	positive regulation of phosphorylation	BIOLOGICAL_PROCESS	9.13689e-10	3.88868e-11	70	0	3219	1329
[OVER]	GO:0044087	regulation of cellular component biogenesis	BIOLOGICAL_PROCESS	9.13689e-10	3.88868e-11	70	0	3219	1329
[OVER]	GO:0034622	cellular protein-containing complex assembly	BIOLOGICAL_PROCESS	9.13689e-10	3.88868e-11	70	0	3219	1329
[OVER]	GO:0033043	regulation of organelle organization	BIOLOGICAL_PROCESS	1.24341e-09	5.30564e-11	86	2	3203	1327
[OVER]	GO:0048666	neuron development	BIOLOGICAL_PROCESS	1.28416e-09	5.49367e-11	69	0	3220	1329
[OVER]	GO:0006820	anion transport	BIOLOGICAL_PROCESS	1.35745e-09	5.82211e-11	78	1	3211	1328
[OVER]	GO:0015075	ion transmembrane transporter activity	MOLECULAR_FUNCTION	1.67136e-09	7.18685e-11	92	3	3197	1326
[OVER]	GO:0051345	positive regulation of hydrolase activity	BIOLOGICAL_PROCESS	1.70201e-09	7.3374e-11	85	2	3204	1327
[OVER]	GO:0001934	positive regulation of protein phosphorylation	BIOLOGICAL_PROCESS	1.79555e-09	7.76038e-11	68	0	3221	1329
[OVER]	GO:0000003	reproduction	BIOLOGICAL_PROCESS	2.34104e-09	1.01437e-10	84	2	3205	1327
[OVER]	GO:0005887	integral component of plasma membrane	CELLULAR_COMPONENT	2.51696e-09	1.09614e-10	67	0	3222	1329
[OVER]	GO:0051130	positive regulation of cellular component organization	BIOLOGICAL_PROCESS	2.51696e-09	1.09614e-10	67	0	3222	1329
[OVER]	GO:0015318	inorganic molecular entity transmembrane transporter activity	MOLECULAR_FUNCTION	3.09358e-09	1.35066e-10	90	3	3199	1326
[OVER]	GO:0005623	cell	CELLULAR_COMPONENT	3.20277e-09	1.40185e-10	83	2	3206	1327
[OVER]	GO:0051603	proteolysis involved in cellular protein catabolic process	BIOLOGICAL_PROCESS	3.5281e-09	1.54813e-10	66	0	3223	1329
[OVER]	GO:0016757	transferase activity, transferring glycosyl groups	MOLECULAR_FUNCTION	4.40248e-09	1.93665e-10	82	2	3207	1327
[OVER]	GO:1990837	sequence-specific double-stranded DNA binding	MOLECULAR_FUNCTION	4.94527e-09	2.1863e-10	65	0	3224	1329
[OVER]	GO:0009607	response to biotic stimulus	BIOLOGICAL_PROCESS	4.94527e-09	2.1863e-10	65	0	3224	1329
[OVER]	GO:0031401	positive regulation of protein modification process	BIOLOGICAL_PROCESS	6.01962e-09	2.6745e-10	81	2	3208	1327
[OVER]	GO:0022414	reproductive process	BIOLOGICAL_PROCESS	6.01962e-09	2.6745e-10	81	2	3208	1327
[OVER]	GO:0030334	regulation of cell migration	BIOLOGICAL_PROCESS	6.84692e-09	3.08023e-10	73	1	3216	1328
[OVER]	GO:0000226	microtubule cytoskeleton organization	BIOLOGICAL_PROCESS	6.84692e-09	3.08725e-10	64	0	3225	1329
[OVER]	GO:0023014	signal transduction by protein phosphorylation	BIOLOGICAL_PROCESS	6.84692e-09	3.08725e-10	64	0	3225	1329
[OVER]	GO:0060548	negative regulation of cell death	BIOLOGICAL_PROCESS	6.84692e-09	3.08725e-10	64	0	3225	1329
[OVER]	GO:1990234	transferase complex	CELLULAR_COMPONENT	6.84692e-09	3.08725e-10	64	0	3225	1329
[OVER]	GO:0005975	carbohydrate metabolic process	BIOLOGICAL_PROCESS	6.84692e-09	3.08023e-10	73	1	3216	1328
[OVER]	GO:0006281	DNA repair	BIOLOGICAL_PROCESS	8.1685e-09	3.69213e-10	80	2	3209	1327
[OVER]	GO:0031975	envelope	CELLULAR_COMPONENT	9.52818e-09	4.35909e-10	63	0	3226	1329
[OVER]	GO:0031967	organelle envelope	CELLULAR_COMPONENT	9.52818e-09	4.35909e-10	63	0	3226	1329
[OVER]	GO:0033365	protein localization to organelle	BIOLOGICAL_PROCESS	9.52818e-09	4.35909e-10	63	0	3226	1329
[OVER]	GO:0045944	positive regulation of transcription by RNA polymerase II	BIOLOGICAL_PROCESS	9.52818e-09	4.35909e-10	63	0	3226	1329
[OVER]	GO:0099513	polymeric cytoskeletal fiber	CELLULAR_COMPONENT	9.52818e-09	4.35909e-10	63	0	3226	1329
[OVER]	GO:0098590	plasma membrane region	CELLULAR_COMPONENT	1.3261e-08	6.15433e-10	62	0	3227	1329
[OVER]	GO:0001067	regulatory region nucleic acid binding	MOLECULAR_FUNCTION	1.3261e-08	6.15433e-10	62	0	3227	1329
[OVER]	GO:0080135	regulation of cellular response to stress	BIOLOGICAL_PROCESS	1.3261e-08	6.15433e-10	62	0	3227	1329
[OVER]	GO:0000165	MAPK cascade	BIOLOGICAL_PROCESS	1.3261e-08	6.15433e-10	62	0	3227	1329
[OVER]	GO:0043207	response to external biotic stimulus	BIOLOGICAL_PROCESS	1.3261e-08	6.15433e-10	62	0	3227	1329
[OVER]	GO:0044212	transcription regulatory region DNA binding	MOLECULAR_FUNCTION	1.3261e-08	6.15433e-10	62	0	3227	1329
[OVER]	GO:0031175	neuron projection development	BIOLOGICAL_PROCESS	1.85885e-08	8.68813e-10	61	0	3228	1329
[OVER]	GO:0051707	response to other organism	BIOLOGICAL_PROCESS	1.85885e-08	8.68813e-10	61	0	3228	1329
[OVER]	GO:0045596	negative regulation of cell differentiation	BIOLOGICAL_PROCESS	1.85885e-08	8.68813e-10	61	0	3228	1329
[OVER]	GO:0005576	extracellular region	CELLULAR_COMPONENT	2.02456e-08	9.48489e-10	159	18	3130	1311
[OVER]	GO:0051338	regulation of transferase activity	BIOLOGICAL_PROCESS	2.06381e-08	9.6915e-10	77	2	3212	1327
[OVER]	GO:0035295	tube development	BIOLOGICAL_PROCESS	2.46951e-08	1.16238e-09	69	1	3220	1328
[OVER]	GO:0032880	regulation of protein localization	BIOLOGICAL_PROCESS	2.56951e-08	1.2264e-09	60	0	3229	1329
[OVER]	GO:0000904	cell morphogenesis involved in differentiation	BIOLOGICAL_PROCESS	2.56951e-08	1.2264e-09	60	0	3229	1329
[OVER]	GO:0004386	helicase activity	MOLECULAR_FUNCTION	2.56951e-08	1.2264e-09	60	0	3229	1329
[OVER]	GO:0009790	embryo development	BIOLOGICAL_PROCESS	2.56951e-08	1.2264e-09	60	0	3229	1329
[OVER]	GO:0140352	export from cell	BIOLOGICAL_PROCESS	2.56951e-08	1.2264e-09	60	0	3229	1329
[OVER]	GO:0045597	positive regulation of cell differentiation	BIOLOGICAL_PROCESS	2.56951e-08	1.2264e-09	60	0	3229	1329
[OVER]	GO:0019941	modification-dependent protein catabolic process	BIOLOGICAL_PROCESS	3.58544e-08	1.73101e-09	59	0	3230	1329
[OVER]	GO:0043632	modification-dependent macromolecule catabolic process	BIOLOGICAL_PROCESS	3.58544e-08	1.73101e-09	59	0	3230	1329
[OVER]	GO:0032940	secretion by cell	BIOLOGICAL_PROCESS	3.58544e-08	1.73101e-09	59	0	3230	1329
[OVER]	GO:0006511	ubiquitin-dependent protein catabolic process	BIOLOGICAL_PROCESS	3.58544e-08	1.73101e-09	59	0	3230	1329
[OVER]	GO:0003924	GTPase activity	MOLECULAR_FUNCTION	3.58544e-08	1.73101e-09	59	0	3230	1329
[OVER]	GO:0032446	protein modification by small protein conjugation	BIOLOGICAL_PROCESS	3.78646e-08	1.84055e-09	75	2	3214	1327
[OVER]	GO:0003779	actin binding	MOLECULAR_FUNCTION	3.78646e-08	1.84055e-09	75	2	3214	1327
[OVER]	GO:1903047	mitotic cell cycle process	BIOLOGICAL_PROCESS	3.78646e-08	1.84055e-09	75	2	3214	1327
[OVER]	GO:0032989	cellular component morphogenesis	BIOLOGICAL_PROCESS	4.92559e-08	2.44302e-09	58	0	3231	1329
[OVER]	GO:0097435	supramolecular fiber organization	BIOLOGICAL_PROCESS	4.92559e-08	2.44302e-09	58	0	3231	1329
[OVER]	GO:0035239	tube morphogenesis	BIOLOGICAL_PROCESS	4.92559e-08	2.44302e-09	58	0	3231	1329
[OVER]	GO:0072358	cardiovascular system development	BIOLOGICAL_PROCESS	4.92559e-08	2.44302e-09	58	0	3231	1329
[OVER]	GO:0009887	animal organ morphogenesis	BIOLOGICAL_PROCESS	4.92559e-08	2.44302e-09	58	0	3231	1329
[OVER]	GO:0070161	anchoring junction	CELLULAR_COMPONENT	4.92559e-08	2.44302e-09	58	0	3231	1329
[OVER]	GO:0016604	nuclear body	CELLULAR_COMPONENT	4.92559e-08	2.44302e-09	58	0	3231	1329
[OVER]	GO:0007264	small GTPase mediated signal transduction	BIOLOGICAL_PROCESS	4.92559e-08	2.44302e-09	58	0	3231	1329
[OVER]	GO:0043069	negative regulation of programmed cell death	BIOLOGICAL_PROCESS	4.92559e-08	2.44302e-09	58	0	3231	1329
[OVER]	GO:0016071	mRNA metabolic process	BIOLOGICAL_PROCESS	6.29875e-08	3.13795e-09	66	1	3223	1328
[OVER]	GO:0005813	centrosome	CELLULAR_COMPONENT	6.29875e-08	3.13795e-09	66	1	3223	1328
[OVER]	GO:0019900	kinase binding	MOLECULAR_FUNCTION	6.82985e-08	3.4476e-09	57	0	3232	1329
[OVER]	GO:0060284	regulation of cell development	BIOLOGICAL_PROCESS	6.82985e-08	3.4476e-09	57	0	3232	1329
[OVER]	GO:0005730	nucleolus	CELLULAR_COMPONENT	6.82985e-08	3.4476e-09	57	0	3232	1329
[OVER]	GO:0000976	transcription regulatory region sequence-specific DNA binding	MOLECULAR_FUNCTION	6.82985e-08	3.4476e-09	57	0	3232	1329
[OVER]	GO:0001944	vasculature development	BIOLOGICAL_PROCESS	6.82985e-08	3.4476e-09	57	0	3232	1329
[OVER]	GO:0045202	synapse	CELLULAR_COMPONENT	6.82985e-08	3.4476e-09	57	0	3232	1329
[OVER]	GO:0004175	endopeptidase activity	MOLECULAR_FUNCTION	6.88333e-08	3.48974e-09	73	2	3216	1327
[OVER]	GO:0016567	protein ubiquitination	BIOLOGICAL_PROCESS	6.88333e-08	3.48974e-09	73	2	3216	1327
[OVER]	GO:0006812	cation transport	BIOLOGICAL_PROCESS	8.27393e-08	4.20384e-09	79	3	3210	1326
[OVER]	GO:0051301	cell division	BIOLOGICAL_PROCESS	8.57596e-08	4.36673e-09	65	1	3224	1328
[OVER]	GO:0043408	regulation of MAPK cascade	BIOLOGICAL_PROCESS	9.47232e-08	4.86481e-09	56	0	3233	1329
[OVER]	GO:0009894	regulation of catabolic process	BIOLOGICAL_PROCESS	9.47232e-08	4.86481e-09	56	0	3233	1329
[OVER]	GO:0002520	immune system development	BIOLOGICAL_PROCESS	9.47232e-08	4.86481e-09	56	0	3233	1329
[OVER]	GO:0043066	negative regulation of apoptotic process	BIOLOGICAL_PROCESS	9.47232e-08	4.86481e-09	56	0	3233	1329
[OVER]	GO:0000228	nuclear chromosome	CELLULAR_COMPONENT	1.18031e-07	6.07485e-09	64	1	3225	1328
[OVER]	GO:0019904	protein domain specific binding	MOLECULAR_FUNCTION	1.30847e-07	6.86399e-09	55	0	3234	1329
[OVER]	GO:1905114	cell surface receptor signaling pathway involved in cell-cell signaling	BIOLOGICAL_PROCESS	1.30847e-07	6.86399e-09	55	0	3234	1329
[OVER]	GO:0000977	RNA polymerase II regulatory region sequence-specific DNA binding	MOLECULAR_FUNCTION	1.30847e-07	6.86399e-09	55	0	3234	1329
[OVER]	GO:0003006	developmental process involved in reproduction	BIOLOGICAL_PROCESS	1.30847e-07	6.86399e-09	55	0	3234	1329
[OVER]	GO:0001012	RNA polymerase II regulatory region DNA binding	MOLECULAR_FUNCTION	1.30847e-07	6.86399e-09	55	0	3234	1329
[OVER]	GO:0016791	phosphatase activity	MOLECULAR_FUNCTION	1.30847e-07	6.86399e-09	55	0	3234	1329
[OVER]	GO:0008237	metallopeptidase activity	MOLECULAR_FUNCTION	1.30847e-07	6.86399e-09	55	0	3234	1329
[OVER]	GO:0008285	negative regulation of cell population proliferation	BIOLOGICAL_PROCESS	1.30847e-07	6.86399e-09	55	0	3234	1329
[OVER]	GO:0070848	response to growth factor	BIOLOGICAL_PROCESS	1.30847e-07	6.86399e-09	55	0	3234	1329
[OVER]	GO:0048534	hematopoietic or lymphoid organ development	BIOLOGICAL_PROCESS	1.83067e-07	9.68384e-09	54	0	3235	1329
[OVER]	GO:0016746	transferase activity, transferring acyl groups	MOLECULAR_FUNCTION	1.83067e-07	9.68384e-09	54	0	3235	1329
[OVER]	GO:0006260	DNA replication	BIOLOGICAL_PROCESS	1.83067e-07	9.68384e-09	54	0	3235	1329
[OVER]	GO:0010942	positive regulation of cell death	BIOLOGICAL_PROCESS	1.83067e-07	9.68384e-09	54	0	3235	1329
[OVER]	GO:0098805	whole membrane	CELLULAR_COMPONENT	2.21588e-07	1.17459e-08	62	1	3227	1328
[OVER]	GO:0030234	enzyme regulator activity	MOLECULAR_FUNCTION	2.23917e-07	1.1894e-08	140	16	3149	1313
[OVER]	GO:0001501	skeletal system development	BIOLOGICAL_PROCESS	2.53508e-07	1.36609e-08	53	0	3236	1329
[OVER]	GO:0001568	blood vessel development	BIOLOGICAL_PROCESS	2.53508e-07	1.36609e-08	53	0	3236	1329
[OVER]	GO:0051960	regulation of nervous system development	BIOLOGICAL_PROCESS	2.53508e-07	1.36609e-08	53	0	3236	1329
[OVER]	GO:0071363	cellular response to growth factor stimulus	BIOLOGICAL_PROCESS	2.53508e-07	1.36609e-08	53	0	3236	1329
[OVER]	GO:0042803	protein homodimerization activity	MOLECULAR_FUNCTION	2.53508e-07	1.36609e-08	53	0	3236	1329
[OVER]	GO:0000785	chromatin	CELLULAR_COMPONENT	2.53508e-07	1.36609e-08	53	0	3236	1329
[OVER]	GO:0043005	neuron projection	CELLULAR_COMPONENT	2.53508e-07	1.36609e-08	53	0	3236	1329
[OVER]	GO:0019901	protein kinase binding	MOLECULAR_FUNCTION	3.53264e-07	1.92696e-08	52	0	3237	1329
[OVER]	GO:0030097	hemopoiesis	BIOLOGICAL_PROCESS	3.53264e-07	1.92696e-08	52	0	3237	1329
[OVER]	GO:1901698	response to nitrogen compound	BIOLOGICAL_PROCESS	3.53264e-07	1.92696e-08	52	0	3237	1329
[OVER]	GO:0010243	response to organonitrogen compound	BIOLOGICAL_PROCESS	3.53264e-07	1.92696e-08	52	0	3237	1329
[OVER]	GO:0032504	multicellular organism reproduction	BIOLOGICAL_PROCESS	3.53264e-07	1.92696e-08	52	0	3237	1329
[OVER]	GO:0000122	negative regulation of transcription by RNA polymerase II	BIOLOGICAL_PROCESS	3.53264e-07	1.92696e-08	52	0	3237	1329
[OVER]	GO:0098660	inorganic ion transmembrane transport	BIOLOGICAL_PROCESS	3.59735e-07	1.96622e-08	74	3	3215	1326
[OVER]	GO:0009725	response to hormone	BIOLOGICAL_PROCESS	4.14146e-07	2.26817e-08	60	1	3229	1328
[OVER]	GO:0007186	G protein-coupled receptor signaling pathway	BIOLOGICAL_PROCESS	4.80034e-07	2.6343e-08	79	4	3210	1325
[OVER]	GO:0098797	plasma membrane protein complex	CELLULAR_COMPONENT	4.87446e-07	2.71786e-08	51	0	3238	1329
[OVER]	GO:0016055	Wnt signaling pathway	BIOLOGICAL_PROCESS	4.87446e-07	2.71786e-08	51	0	3238	1329
[OVER]	GO:0005085	guanyl-nucleotide exchange factor activity	MOLECULAR_FUNCTION	4.87446e-07	2.71786e-08	51	0	3238	1329
[OVER]	GO:0042493	response to drug	BIOLOGICAL_PROCESS	4.87446e-07	2.71786e-08	51	0	3238	1329
[OVER]	GO:0048609	multicellular organismal reproductive process	BIOLOGICAL_PROCESS	4.87446e-07	2.71786e-08	51	0	3238	1329
[OVER]	GO:0071103	DNA conformation change	BIOLOGICAL_PROCESS	4.87446e-07	2.71786e-08	51	0	3238	1329
[OVER]	GO:0008234	cysteine-type peptidase activity	MOLECULAR_FUNCTION	4.87446e-07	2.71786e-08	51	0	3238	1329
[OVER]	GO:0198738	cell-cell signaling by wnt	BIOLOGICAL_PROCESS	4.87446e-07	2.71786e-08	51	0	3238	1329
[OVER]	GO:0017016	Ras GTPase binding	MOLECULAR_FUNCTION	6.8475e-07	3.83303e-08	50	0	3239	1329
[OVER]	GO:0031267	small GTPase binding	MOLECULAR_FUNCTION	6.8475e-07	3.83303e-08	50	0	3239	1329
[OVER]	GO:0051704	multi-organism process	BIOLOGICAL_PROCESS	7.79854e-07	4.37398e-08	58	1	3231	1328
[OVER]	GO:0008289	lipid binding	MOLECULAR_FUNCTION	7.88337e-07	4.43023e-08	65	2	3224	1327
[OVER]	GO:0008047	enzyme activator activity	MOLECULAR_FUNCTION	8.75203e-07	4.92801e-08	71	3	3218	1326
[OVER]	GO:0006753	nucleoside phosphate metabolic process	BIOLOGICAL_PROCESS	9.48847e-07	5.40529e-08	49	0	3240	1329
[OVER]	GO:0097190	apoptotic signaling pathway	BIOLOGICAL_PROCESS	9.48847e-07	5.40529e-08	49	0	3240	1329
[OVER]	GO:0030155	regulation of cell adhesion	BIOLOGICAL_PROCESS	9.48847e-07	5.40529e-08	49	0	3240	1329
[OVER]	GO:0009628	response to abiotic stimulus	BIOLOGICAL_PROCESS	9.48847e-07	5.40529e-08	49	0	3240	1329
[OVER]	GO:0043068	positive regulation of programmed cell death	BIOLOGICAL_PROCESS	9.48847e-07	5.40529e-08	49	0	3240	1329
[OVER]	GO:0043065	positive regulation of apoptotic process	BIOLOGICAL_PROCESS	9.48847e-07	5.40529e-08	49	0	3240	1329
[OVER]	GO:0033993	response to lipid	BIOLOGICAL_PROCESS	1.06158e-06	6.07082e-08	57	1	3232	1328
[OVER]	GO:0016741	transferase activity, transferring one-carbon groups	MOLECULAR_FUNCTION	1.06158e-06	6.07082e-08	57	1	3232	1328
[OVER]	GO:0032990	cell part morphogenesis	BIOLOGICAL_PROCESS	1.32009e-06	7.62177e-08	48	0	3241	1329
[OVER]	GO:0006470	protein dephosphorylation	BIOLOGICAL_PROCESS	1.32009e-06	7.62177e-08	48	0	3241	1329
[OVER]	GO:0120039	plasma membrane bounded cell projection morphogenesis	BIOLOGICAL_PROCESS	1.32009e-06	7.62177e-08	48	0	3241	1329
[OVER]	GO:0048812	neuron projection morphogenesis	BIOLOGICAL_PROCESS	1.32009e-06	7.62177e-08	48	0	3241	1329
[OVER]	GO:0048858	cell projection morphogenesis	BIOLOGICAL_PROCESS	1.32009e-06	7.62177e-08	48	0	3241	1329
[OVER]	GO:0016874	ligase activity	MOLECULAR_FUNCTION	1.43588e-06	8.32187e-08	63	2	3226	1327
[OVER]	GO:0010876	lipid localization	BIOLOGICAL_PROCESS	1.43588e-06	8.32187e-08	63	2	3226	1327
[OVER]	GO:1990904	ribonucleoprotein complex	CELLULAR_COMPONENT	1.43965e-06	8.42288e-08	56	1	3233	1328
[OVER]	GO:0005840	ribosome	CELLULAR_COMPONENT	1.43965e-06	8.42288e-08	56	1	3233	1328
[OVER]	GO:0022804	active transmembrane transporter activity	MOLECULAR_FUNCTION	1.43965e-06	8.42288e-08	56	1	3233	1328
[OVER]	GO:0008284	positive regulation of cell population proliferation	BIOLOGICAL_PROCESS	1.43965e-06	8.42288e-08	56	1	3233	1328
[OVER]	GO:0055086	nucleobase-containing small molecule metabolic process	BIOLOGICAL_PROCESS	1.43965e-06	8.42288e-08	56	1	3233	1328
[OVER]	GO:0009117	nucleotide metabolic process	BIOLOGICAL_PROCESS	1.81289e-06	1.07462e-07	47	0	3242	1329
[OVER]	GO:0009100	glycoprotein metabolic process	BIOLOGICAL_PROCESS	1.81289e-06	1.07462e-07	47	0	3242	1329
[OVER]	GO:0007169	transmembrane receptor protein tyrosine kinase signaling pathway	BIOLOGICAL_PROCESS	1.81289e-06	1.07462e-07	47	0	3242	1329
[OVER]	GO:0051050	positive regulation of transport	BIOLOGICAL_PROCESS	1.81289e-06	1.07462e-07	47	0	3242	1329
[OVER]	GO:0010563	negative regulation of phosphorus metabolic process	BIOLOGICAL_PROCESS	1.81289e-06	1.07462e-07	47	0	3242	1329
[OVER]	GO:0045936	negative regulation of phosphate metabolic process	BIOLOGICAL_PROCESS	1.81289e-06	1.07462e-07	47	0	3242	1329
[OVER]	GO:0007417	central nervous system development	BIOLOGICAL_PROCESS	1.81289e-06	1.07462e-07	47	0	3242	1329
[OVER]	GO:0050662	coenzyme binding	MOLECULAR_FUNCTION	1.91905e-06	1.13966e-07	62	2	3227	1327
[OVER]	GO:0005581	collagen trimer	CELLULAR_COMPONENT	1.95984e-06	1.16819e-07	55	1	3234	1328
[OVER]	GO:0014070	response to organic cyclic compound	BIOLOGICAL_PROCESS	1.95984e-06	1.16819e-07	55	1	3234	1328
[OVER]	GO:0051248	negative regulation of protein metabolic process	BIOLOGICAL_PROCESS	2.2274e-06	1.33012e-07	99	9	3190	1320
[OVER]	GO:0050767	regulation of neurogenesis	BIOLOGICAL_PROCESS	2.50017e-06	1.515e-07	46	0	3243	1329
[OVER]	GO:0048589	developmental growth	BIOLOGICAL_PROCESS	2.50017e-06	1.515e-07	46	0	3243	1329
[OVER]	GO:0048514	blood vessel morphogenesis	BIOLOGICAL_PROCESS	2.50017e-06	1.515e-07	46	0	3243	1329
[OVER]	GO:0005768	endosome	CELLULAR_COMPONENT	2.50017e-06	1.515e-07	46	0	3243	1329
[OVER]	GO:1901615	organic hydroxy compound metabolic process	BIOLOGICAL_PROCESS	2.50017e-06	1.515e-07	46	0	3243	1329
[OVER]	GO:0000987	cis-regulatory region sequence-specific DNA binding	MOLECULAR_FUNCTION	2.50017e-06	1.515e-07	46	0	3243	1329
[OVER]	GO:0035326	cis-regulatory region binding	MOLECULAR_FUNCTION	2.50017e-06	1.515e-07	46	0	3243	1329
[OVER]	GO:0015711	organic anion transport	BIOLOGICAL_PROCESS	2.50017e-06	1.515e-07	46	0	3243	1329
[OVER]	GO:0030001	metal ion transport	BIOLOGICAL_PROCESS	2.56027e-06	1.55987e-07	61	2	3228	1327
[OVER]	GO:0048878	chemical homeostasis	BIOLOGICAL_PROCESS	2.56027e-06	1.55987e-07	61	2	3228	1327
[OVER]	GO:0010564	regulation of cell cycle process	BIOLOGICAL_PROCESS	2.56027e-06	1.55987e-07	61	2	3228	1327
[OVER]	GO:0008168	methyltransferase activity	MOLECULAR_FUNCTION	2.65345e-06	1.61956e-07	54	1	3235	1328
[OVER]	GO:0032269	negative regulation of cellular protein metabolic process	BIOLOGICAL_PROCESS	2.82645e-06	1.72826e-07	98	9	3191	1320
[OVER]	GO:0048471	perinuclear region of cytoplasm	CELLULAR_COMPONENT	3.42498e-06	2.13567e-07	45	0	3244	1329
[OVER]	GO:1903827	regulation of cellular protein localization	BIOLOGICAL_PROCESS	3.42498e-06	2.13567e-07	45	0	3244	1329
[OVER]	GO:0050877	nervous system process	BIOLOGICAL_PROCESS	3.42498e-06	2.13567e-07	45	0	3244	1329
[OVER]	GO:0006397	mRNA processing	BIOLOGICAL_PROCESS	3.42498e-06	2.13567e-07	45	0	3244	1329
[OVER]	GO:0001503	ossification	BIOLOGICAL_PROCESS	3.42498e-06	2.13567e-07	45	0	3244	1329
[OVER]	GO:0042175	nuclear outer membrane-endoplasmic reticulum membrane network	CELLULAR_COMPONENT	3.42498e-06	2.13567e-07	45	0	3244	1329
[OVER]	GO:0090407	organophosphate biosynthetic process	BIOLOGICAL_PROCESS	3.42498e-06	2.13567e-07	45	0	3244	1329
[OVER]	GO:0009101	glycoprotein biosynthetic process	BIOLOGICAL_PROCESS	3.42498e-06	2.13567e-07	45	0	3244	1329
[OVER]	GO:0006325	chromatin organization	BIOLOGICAL_PROCESS	3.42498e-06	2.13383e-07	60	2	3229	1327
[OVER]	GO:0045860	positive regulation of protein kinase activity	BIOLOGICAL_PROCESS	3.42498e-06	2.13567e-07	45	0	3244	1329
[OVER]	GO:0033674	positive regulation of kinase activity	BIOLOGICAL_PROCESS	3.42498e-06	2.13567e-07	45	0	3244	1329
[OVER]	GO:0032870	cellular response to hormone stimulus	BIOLOGICAL_PROCESS	3.59311e-06	2.24446e-07	53	1	3236	1328
[OVER]	GO:0031400	negative regulation of protein modification process	BIOLOGICAL_PROCESS	4.76052e-06	3.01034e-07	44	0	3245	1329
[OVER]	GO:0030031	cell projection assembly	BIOLOGICAL_PROCESS	4.76052e-06	3.01034e-07	44	0	3245	1329
[OVER]	GO:0120031	plasma membrane bounded cell projection assembly	BIOLOGICAL_PROCESS	4.76052e-06	3.01034e-07	44	0	3245	1329
[OVER]	GO:0005789	endoplasmic reticulum membrane	CELLULAR_COMPONENT	4.76052e-06	3.01034e-07	44	0	3245	1329
[OVER]	GO:0030855	epithelial cell differentiation	BIOLOGICAL_PROCESS	4.76052e-06	3.01034e-07	44	0	3245	1329
[OVER]	GO:0000978	RNA polymerase II cis-regulatory region sequence-specific DNA binding	MOLECULAR_FUNCTION	4.76052e-06	3.01034e-07	44	0	3245	1329
[OVER]	GO:0048667	cell morphogenesis involved in neuron differentiation	BIOLOGICAL_PROCESS	4.76052e-06	3.01034e-07	44	0	3245	1329
[OVER]	GO:0002682	regulation of immune system process	BIOLOGICAL_PROCESS	4.80483e-06	3.04364e-07	65	3	3224	1326
[OVER]	GO:0044703	multi-organism reproductive process	BIOLOGICAL_PROCESS	4.88293e-06	3.10922e-07	52	1	3237	1328
[OVER]	GO:0051129	negative regulation of cellular component organization	BIOLOGICAL_PROCESS	4.88293e-06	3.10922e-07	52	1	3237	1328
[OVER]	GO:0032259	methylation	BIOLOGICAL_PROCESS	4.88293e-06	3.10922e-07	52	1	3237	1328
[OVER]	GO:0006952	defense response	BIOLOGICAL_PROCESS	6.2492e-06	3.98607e-07	58	2	3231	1327
[OVER]	GO:0005911	cell-cell junction	CELLULAR_COMPONENT	6.58366e-06	4.24285e-07	43	0	3246	1329
[OVER]	GO:0016758	transferase activity, transferring hexosyl groups	MOLECULAR_FUNCTION	6.58366e-06	4.24285e-07	43	0	3246	1329
[OVER]	GO:0051046	regulation of secretion	BIOLOGICAL_PROCESS	6.58366e-06	4.24285e-07	43	0	3246	1329
[OVER]	GO:0061024	membrane organization	BIOLOGICAL_PROCESS	6.58366e-06	4.24285e-07	43	0	3246	1329
[OVER]	GO:0007276	gamete generation	BIOLOGICAL_PROCESS	6.58366e-06	4.24285e-07	43	0	3246	1329
[OVER]	GO:0071900	regulation of protein serine/threonine kinase activity	BIOLOGICAL_PROCESS	6.58366e-06	4.24285e-07	43	0	3246	1329
[OVER]	GO:0098609	cell-cell adhesion	BIOLOGICAL_PROCESS	6.65795e-06	4.30537e-07	51	1	3238	1328
[OVER]	GO:0071396	cellular response to lipid	BIOLOGICAL_PROCESS	6.65795e-06	4.30537e-07	51	1	3238	1328
[OVER]	GO:0098655	cation transmembrane transport	BIOLOGICAL_PROCESS	8.40307e-06	5.44309e-07	57	2	3232	1327
[OVER]	GO:0044419	interspecies interaction between organisms	BIOLOGICAL_PROCESS	8.82633e-06	5.72697e-07	79	6	3210	1323
[OVER]	GO:0006644	phospholipid metabolic process	BIOLOGICAL_PROCESS	9.12268e-06	5.97945e-07	42	0	3247	1329
[OVER]	GO:0019953	sexual reproduction	BIOLOGICAL_PROCESS	9.12268e-06	5.95916e-07	50	1	3239	1328
[OVER]	GO:0031329	regulation of cellular catabolic process	BIOLOGICAL_PROCESS	9.12268e-06	5.97945e-07	42	0	3247	1329
[OVER]	GO:0070085	glycosylation	BIOLOGICAL_PROCESS	9.12268e-06	5.97945e-07	42	0	3247	1329
[OVER]	GO:0000981	DNA-binding transcription factor activity, RNA polymerase II-specific	MOLECULAR_FUNCTION	9.12268e-06	5.95916e-07	50	1	3239	1328
[OVER]	GO:0044283	small molecule biosynthetic process	BIOLOGICAL_PROCESS	9.12268e-06	5.95916e-07	50	1	3239	1328
[OVER]	GO:0051640	organelle localization	BIOLOGICAL_PROCESS	1.25364e-05	8.24457e-07	49	1	3240	1328
[OVER]	GO:0045786	negative regulation of cell cycle	BIOLOGICAL_PROCESS	1.25364e-05	8.24457e-07	49	1	3240	1328
[OVER]	GO:0040008	regulation of growth	BIOLOGICAL_PROCESS	1.27273e-05	8.4261e-07	41	0	3248	1329
[OVER]	GO:0061061	muscle structure development	BIOLOGICAL_PROCESS	1.27273e-05	8.4261e-07	41	0	3248	1329
[OVER]	GO:0018212	peptidyl-tyrosine modification	BIOLOGICAL_PROCESS	1.27273e-05	8.4261e-07	41	0	3248	1329
[OVER]	GO:0000139	Golgi membrane	CELLULAR_COMPONENT	1.27273e-05	8.4261e-07	41	0	3248	1329
[OVER]	GO:0006869	lipid transport	BIOLOGICAL_PROCESS	1.52762e-05	1.01304e-06	55	2	3234	1327
[OVER]	GO:0006259	DNA metabolic process	BIOLOGICAL_PROCESS	1.5739e-05	1.04546e-06	129	18	3160	1311
[OVER]	GO:0005874	microtubule	CELLULAR_COMPONENT	1.77273e-05	1.18728e-06	40	0	3249	1329
[OVER]	GO:0034330	cell junction organization	BIOLOGICAL_PROCESS	1.77273e-05	1.18728e-06	40	0	3249	1329
[OVER]	GO:0005929	cilium	CELLULAR_COMPONENT	1.77273e-05	1.18728e-06	40	0	3249	1329
[OVER]	GO:0051052	regulation of DNA metabolic process	BIOLOGICAL_PROCESS	1.77273e-05	1.18728e-06	40	0	3249	1329
[OVER]	GO:0018108	peptidyl-tyrosine phosphorylation	BIOLOGICAL_PROCESS	1.77273e-05	1.18728e-06	40	0	3249	1329
[OVER]	GO:0043547	positive regulation of GTPase activity	BIOLOGICAL_PROCESS	2.05473e-05	1.38067e-06	54	2	3235	1327
[OVER]	GO:0008324	cation transmembrane transporter activity	MOLECULAR_FUNCTION	2.05473e-05	1.38067e-06	54	2	3235	1327
[OVER]	GO:0071407	cellular response to organic cyclic compound	BIOLOGICAL_PROCESS	2.3415e-05	1.57593e-06	47	1	3242	1328
[OVER]	GO:0061564	axon development	BIOLOGICAL_PROCESS	2.44544e-05	1.67278e-06	39	0	3250	1329
[OVER]	GO:0019787	ubiquitin-like protein transferase activity	MOLECULAR_FUNCTION	2.44544e-05	1.67278e-06	39	0	3250	1329
[OVER]	GO:0031344	regulation of cell projection organization	BIOLOGICAL_PROCESS	2.44544e-05	1.67278e-06	39	0	3250	1329
[OVER]	GO:0120035	regulation of plasma membrane bounded cell projection organization	BIOLOGICAL_PROCESS	2.44544e-05	1.67278e-06	39	0	3250	1329
[OVER]	GO:0016829	lyase activity	MOLECULAR_FUNCTION	2.44544e-05	1.67278e-06	39	0	3250	1329
[OVER]	GO:0004842	ubiquitin-protein transferase activity	MOLECULAR_FUNCTION	2.44544e-05	1.67278e-06	39	0	3250	1329
[OVER]	GO:0003682	chromatin binding	MOLECULAR_FUNCTION	2.44544e-05	1.67278e-06	39	0	3250	1329
[OVER]	GO:0045182	translation regulator activity	MOLECULAR_FUNCTION	2.44544e-05	1.67278e-06	39	0	3250	1329
[OVER]	GO:0051493	regulation of cytoskeleton organization	BIOLOGICAL_PROCESS	2.44544e-05	1.67278e-06	39	0	3250	1329
[OVER]	GO:0007423	sensory organ development	BIOLOGICAL_PROCESS	2.44544e-05	1.67278e-06	39	0	3250	1329
[OVER]	GO:0043087	regulation of GTPase activity	BIOLOGICAL_PROCESS	2.6747e-05	1.83255e-06	59	3	3230	1326
[OVER]	GO:0022890	inorganic cation transmembrane transporter activity	MOLECULAR_FUNCTION	2.74019e-05	1.88043e-06	53	2	3236	1327
[OVER]	GO:0043413	macromolecule glycosylation	BIOLOGICAL_PROCESS	3.37992e-05	2.35661e-06	38	0	3251	1329
[OVER]	GO:0006486	protein glycosylation	BIOLOGICAL_PROCESS	3.37992e-05	2.35661e-06	38	0	3251	1329
[OVER]	GO:1903530	regulation of secretion by cell	BIOLOGICAL_PROCESS	3.37992e-05	2.35661e-06	38	0	3251	1329
[OVER]	GO:2001233	regulation of apoptotic signaling pathway	BIOLOGICAL_PROCESS	3.37992e-05	2.35661e-06	38	0	3251	1329
[OVER]	GO:0000790	nuclear chromatin	CELLULAR_COMPONENT	3.37992e-05	2.35661e-06	38	0	3251	1329
[OVER]	GO:0048729	tissue morphogenesis	BIOLOGICAL_PROCESS	3.37992e-05	2.35661e-06	38	0	3251	1329
[OVER]	GO:0044089	positive regulation of cellular component biogenesis	BIOLOGICAL_PROCESS	3.37992e-05	2.35661e-06	38	0	3251	1329
[OVER]	GO:0010638	positive regulation of organelle organization	BIOLOGICAL_PROCESS	3.37992e-05	2.35661e-06	38	0	3251	1329
[OVER]	GO:0022613	ribonucleoprotein complex biogenesis	BIOLOGICAL_PROCESS	3.37992e-05	2.35661e-06	38	0	3251	1329
[OVER]	GO:0008134	transcription factor binding	MOLECULAR_FUNCTION	3.37992e-05	2.35661e-06	38	0	3251	1329
[OVER]	GO:0008610	lipid biosynthetic process	BIOLOGICAL_PROCESS	3.66483e-05	2.5593e-06	52	2	3237	1327
[OVER]	GO:0051272	positive regulation of cellular component movement	BIOLOGICAL_PROCESS	4.29178e-05	3.00656e-06	45	1	3244	1328
[OVER]	GO:0032101	regulation of response to external stimulus	BIOLOGICAL_PROCESS	4.29178e-05	3.00656e-06	45	1	3244	1328
[OVER]	GO:0016049	cell growth	BIOLOGICAL_PROCESS	4.644e-05	3.31969e-06	37	0	3252	1329
[OVER]	GO:0090079	translation regulator activity, nucleic acid binding	MOLECULAR_FUNCTION	4.644e-05	3.31969e-06	37	0	3252	1329
[OVER]	GO:0001525	angiogenesis	BIOLOGICAL_PROCESS	4.644e-05	3.31969e-06	37	0	3252	1329
[OVER]	GO:0023061	signal release	BIOLOGICAL_PROCESS	4.644e-05	3.31969e-06	37	0	3252	1329
[OVER]	GO:0005773	vacuole	CELLULAR_COMPONENT	4.644e-05	3.31969e-06	37	0	3252	1329
[OVER]	GO:0061919	process utilizing autophagic mechanism	BIOLOGICAL_PROCESS	4.644e-05	3.31969e-06	37	0	3252	1329
[OVER]	GO:0060322	head development	BIOLOGICAL_PROCESS	4.644e-05	3.31969e-06	37	0	3252	1329
[OVER]	GO:0006914	autophagy	BIOLOGICAL_PROCESS	4.644e-05	3.31969e-06	37	0	3252	1329
[OVER]	GO:0034660	ncRNA metabolic process	BIOLOGICAL_PROCESS	4.644e-05	3.31969e-06	37	0	3252	1329
[OVER]	GO:0051186	cofactor metabolic process	BIOLOGICAL_PROCESS	4.644e-05	3.31969e-06	37	0	3252	1329
[OVER]	GO:0016747	transferase activity, transferring acyl groups other than amino-acyl groups	MOLECULAR_FUNCTION	4.644e-05	3.31969e-06	37	0	3252	1329
[OVER]	GO:0009611	response to wounding	BIOLOGICAL_PROCESS	4.644e-05	3.31969e-06	37	0	3252	1329
[OVER]	GO:0007409	axonogenesis	BIOLOGICAL_PROCESS	4.644e-05	3.31969e-06	37	0	3252	1329
[OVER]	GO:0019725	cellular homeostasis	BIOLOGICAL_PROCESS	4.8469e-05	3.48073e-06	51	2	3238	1327
[OVER]	GO:0098662	inorganic cation transmembrane transport	BIOLOGICAL_PROCESS	4.8469e-05	3.48073e-06	51	2	3238	1327
[OVER]	GO:0044092	negative regulation of molecular function	BIOLOGICAL_PROCESS	4.8469e-05	3.4765e-06	95	11	3194	1318
[OVER]	GO:2000147	positive regulation of cell motility	BIOLOGICAL_PROCESS	5.73437e-05	4.14958e-06	44	1	3245	1328
[OVER]	GO:0042330	taxis	BIOLOGICAL_PROCESS	5.73437e-05	4.14958e-06	44	1	3245	1328
[OVER]	GO:1901361	organic cyclic compound catabolic process	BIOLOGICAL_PROCESS	5.73437e-05	4.14958e-06	44	1	3245	1328
[OVER]	GO:0006935	chemotaxis	BIOLOGICAL_PROCESS	5.73437e-05	4.14958e-06	44	1	3245	1328
[OVER]	GO:0040017	positive regulation of locomotion	BIOLOGICAL_PROCESS	5.73437e-05	4.14958e-06	44	1	3245	1328
[OVER]	GO:0017144	drug metabolic process	BIOLOGICAL_PROCESS	6.32713e-05	4.67594e-06	36	0	3253	1329
[OVER]	GO:0042060	wound healing	BIOLOGICAL_PROCESS	6.32713e-05	4.67594e-06	36	0	3253	1329
[OVER]	GO:2001020	regulation of response to DNA damage stimulus	BIOLOGICAL_PROCESS	6.32713e-05	4.67594e-06	36	0	3253	1329
[OVER]	GO:1901699	cellular response to nitrogen compound	BIOLOGICAL_PROCESS	6.32713e-05	4.67594e-06	36	0	3253	1329
[OVER]	GO:0072657	protein localization to membrane	BIOLOGICAL_PROCESS	6.32713e-05	4.67594e-06	36	0	3253	1329
[OVER]	GO:0006897	endocytosis	BIOLOGICAL_PROCESS	6.32713e-05	4.67594e-06	36	0	3253	1329
[OVER]	GO:0006979	response to oxidative stress	BIOLOGICAL_PROCESS	6.32713e-05	4.67594e-06	36	0	3253	1329
[OVER]	GO:0008380	RNA splicing	BIOLOGICAL_PROCESS	6.32713e-05	4.67594e-06	36	0	3253	1329
[OVER]	GO:0007178	transmembrane receptor protein serine/threonine kinase signaling pathway	BIOLOGICAL_PROCESS	6.32713e-05	4.67594e-06	36	0	3253	1329
[OVER]	GO:0008135	translation factor activity, RNA binding	MOLECULAR_FUNCTION	6.32713e-05	4.67594e-06	36	0	3253	1329
[OVER]	GO:0071417	cellular response to organonitrogen compound	BIOLOGICAL_PROCESS	6.32713e-05	4.67594e-06	36	0	3253	1329
[OVER]	GO:0004721	phosphoprotein phosphatase activity	MOLECULAR_FUNCTION	6.32713e-05	4.67594e-06	36	0	3253	1329
[OVER]	GO:0003712	transcription coregulator activity	MOLECULAR_FUNCTION	6.32713e-05	4.67594e-06	36	0	3253	1329
[OVER]	GO:0045664	regulation of neuron differentiation	BIOLOGICAL_PROCESS	6.32713e-05	4.67594e-06	36	0	3253	1329
[OVER]	GO:0015631	tubulin binding	MOLECULAR_FUNCTION	6.39128e-05	4.73038e-06	50	2	3239	1327
[OVER]	GO:0030335	positive regulation of cell migration	BIOLOGICAL_PROCESS	7.72243e-05	5.72409e-06	43	1	3246	1328
[OVER]	GO:0001775	cell activation	BIOLOGICAL_PROCESS	8.61517e-05	6.42372e-06	49	2	3240	1327
[OVER]	GO:0060589	nucleoside-triphosphatase regulator activity	MOLECULAR_FUNCTION	8.61517e-05	6.42372e-06	49	2	3240	1327
[OVER]	GO:0051347	positive regulation of transferase activity	BIOLOGICAL_PROCESS	8.61517e-05	6.42372e-06	49	2	3240	1327
[OVER]	GO:0002684	positive regulation of immune system process	BIOLOGICAL_PROCESS	8.61517e-05	6.42372e-06	49	2	3240	1327
[OVER]	GO:0042326	negative regulation of phosphorylation	BIOLOGICAL_PROCESS	8.70402e-05	6.58569e-06	35	0	3254	1329
[OVER]	GO:0048598	embryonic morphogenesis	BIOLOGICAL_PROCESS	8.70402e-05	6.58569e-06	35	0	3254	1329
[OVER]	GO:0098687	chromosomal region	CELLULAR_COMPONENT	8.70402e-05	6.58569e-06	35	0	3254	1329
[OVER]	GO:0030111	regulation of Wnt signaling pathway	BIOLOGICAL_PROCESS	8.70402e-05	6.58569e-06	35	0	3254	1329
[OVER]	GO:0005740	mitochondrial envelope	CELLULAR_COMPONENT	8.70402e-05	6.58569e-06	35	0	3254	1329
[OVER]	GO:0072594	establishment of protein localization to organelle	BIOLOGICAL_PROCESS	8.70402e-05	6.58569e-06	35	0	3254	1329
[OVER]	GO:0072521	purine-containing compound metabolic process	BIOLOGICAL_PROCESS	8.70402e-05	6.58569e-06	35	0	3254	1329
[OVER]	GO:0007015	actin filament organization	BIOLOGICAL_PROCESS	8.70402e-05	6.58569e-06	35	0	3254	1329
[OVER]	GO:0010817	regulation of hormone levels	BIOLOGICAL_PROCESS	8.70402e-05	6.58569e-06	35	0	3254	1329
[OVER]	GO:0070201	regulation of establishment of protein localization	BIOLOGICAL_PROCESS	8.70402e-05	6.58569e-06	35	0	3254	1329
[OVER]	GO:0005543	phospholipid binding	MOLECULAR_FUNCTION	0.00010415	7.89168e-06	42	1	3247	1328
[OVER]	GO:0034097	response to cytokine	BIOLOGICAL_PROCESS	0.000114699	8.71629e-06	48	2	3241	1327
[OVER]	GO:0030695	GTPase regulator activity	MOLECULAR_FUNCTION	0.000114699	8.71629e-06	48	2	3241	1327
[OVER]	GO:0001816	cytokine production	BIOLOGICAL_PROCESS	0.000120822	9.2746e-06	34	0	3255	1329
[OVER]	GO:0043410	positive regulation of MAPK cascade	BIOLOGICAL_PROCESS	0.000120822	9.2746e-06	34	0	3255	1329
[OVER]	GO:0010608	posttranscriptional regulation of gene expression	BIOLOGICAL_PROCESS	0.000120822	9.2746e-06	34	0	3255	1329
[OVER]	GO:0051656	establishment of organelle localization	BIOLOGICAL_PROCESS	0.000120822	9.2746e-06	34	0	3255	1329
[OVER]	GO:0043254	regulation of protein-containing complex assembly	BIOLOGICAL_PROCESS	0.000120822	9.2746e-06	34	0	3255	1329
[OVER]	GO:0043269	regulation of ion transport	BIOLOGICAL_PROCESS	0.000120822	9.2746e-06	34	0	3255	1329
[OVER]	GO:0007265	Ras protein signal transduction	BIOLOGICAL_PROCESS	0.000120822	9.2746e-06	34	0	3255	1329
[OVER]	GO:0005096	GTPase activator activity	MOLECULAR_FUNCTION	0.000153727	1.18173e-05	47	2	3242	1327
[OVER]	GO:0061448	connective tissue development	BIOLOGICAL_PROCESS	0.000167498	1.30602e-05	33	0	3256	1329
[OVER]	GO:1902532	negative regulation of intracellular signal transduction	BIOLOGICAL_PROCESS	0.000167498	1.30602e-05	33	0	3256	1329
[OVER]	GO:0090087	regulation of peptide transport	BIOLOGICAL_PROCESS	0.000167498	1.30602e-05	33	0	3256	1329
[OVER]	GO:0005201	extracellular matrix structural constituent	MOLECULAR_FUNCTION	0.000167498	1.30602e-05	33	0	3256	1329
[OVER]	GO:0001667	ameboidal-type cell migration	BIOLOGICAL_PROCESS	0.000167498	1.30602e-05	33	0	3256	1329
[OVER]	GO:0001933	negative regulation of protein phosphorylation	BIOLOGICAL_PROCESS	0.000167498	1.30602e-05	33	0	3256	1329
[OVER]	GO:0046486	glycerolipid metabolic process	BIOLOGICAL_PROCESS	0.000167498	1.30602e-05	33	0	3256	1329
[OVER]	GO:0022604	regulation of cell morphogenesis	BIOLOGICAL_PROCESS	0.000167498	1.30602e-05	33	0	3256	1329
[OVER]	GO:0006163	purine nucleotide metabolic process	BIOLOGICAL_PROCESS	0.000167498	1.30602e-05	33	0	3256	1329
[OVER]	GO:0007420	brain development	BIOLOGICAL_PROCESS	0.000167498	1.30602e-05	33	0	3256	1329
[OVER]	GO:0006520	cellular amino acid metabolic process	BIOLOGICAL_PROCESS	0.000191503	1.4974e-05	40	1	3249	1328
[OVER]	GO:0032787	monocarboxylic acid metabolic process	BIOLOGICAL_PROCESS	0.000191503	1.4974e-05	40	1	3249	1328
[OVER]	GO:0071345	cellular response to cytokine stimulus	BIOLOGICAL_PROCESS	0.000203581	1.6008e-05	46	2	3243	1327
[OVER]	GO:0045321	leukocyte activation	BIOLOGICAL_PROCESS	0.000203581	1.6008e-05	46	2	3243	1327
[OVER]	GO:0016705	oxidoreductase activity, acting on paired donors, with incorporation or reduction of molecular oxygen	MOLECULAR_FUNCTION	0.000203581	1.6008e-05	46	2	3243	1327
[OVER]	GO:0007346	regulation of mitotic cell cycle	BIOLOGICAL_PROCESS	0.000203581	1.6008e-05	46	2	3243	1327
[OVER]	GO:0031589	cell-substrate adhesion	BIOLOGICAL_PROCESS	0.00023192	1.83893e-05	32	0	3257	1329
[OVER]	GO:0004222	metalloendopeptidase activity	MOLECULAR_FUNCTION	0.00023192	1.83893e-05	32	0	3257	1329
[OVER]	GO:0051223	regulation of protein transport	BIOLOGICAL_PROCESS	0.00023192	1.83893e-05	32	0	3257	1329
[OVER]	GO:0010498	proteasomal protein catabolic process	BIOLOGICAL_PROCESS	0.00023192	1.83893e-05	32	0	3257	1329
[OVER]	GO:0007507	heart development	BIOLOGICAL_PROCESS	0.00023192	1.83893e-05	32	0	3257	1329
[OVER]	GO:0044389	ubiquitin-like protein ligase binding	MOLECULAR_FUNCTION	0.00023192	1.83893e-05	32	0	3257	1329
[OVER]	GO:0004930	G protein-coupled receptor activity	MOLECULAR_FUNCTION	0.000256216	2.0344e-05	56	4	3233	1325
[OVER]	GO:0019439	aromatic compound catabolic process	BIOLOGICAL_PROCESS	0.000259176	2.06075e-05	39	1	3250	1328
[OVER]	GO:0019693	ribose phosphate metabolic process	BIOLOGICAL_PROCESS	0.000321179	2.58907e-05	31	0	3258	1329
[OVER]	GO:0009259	ribonucleotide metabolic process	BIOLOGICAL_PROCESS	0.000321179	2.58907e-05	31	0	3258	1329
[OVER]	GO:0072511	divalent inorganic cation transport	BIOLOGICAL_PROCESS	0.000321179	2.58907e-05	31	0	3258	1329
[OVER]	GO:0031966	mitochondrial membrane	CELLULAR_COMPONENT	0.000321179	2.58907e-05	31	0	3258	1329
[OVER]	GO:0009150	purine ribonucleotide metabolic process	BIOLOGICAL_PROCESS	0.000321179	2.58907e-05	31	0	3258	1329
[OVER]	GO:0002009	morphogenesis of an epithelium	BIOLOGICAL_PROCESS	0.000321179	2.58907e-05	31	0	3258	1329
[OVER]	GO:0008238	exopeptidase activity	MOLECULAR_FUNCTION	0.000321179	2.58907e-05	31	0	3258	1329
[OVER]	GO:0070838	divalent metal ion transport	BIOLOGICAL_PROCESS	0.000321179	2.58907e-05	31	0	3258	1329
[OVER]	GO:0022853	active ion transmembrane transporter activity	MOLECULAR_FUNCTION	0.000321179	2.58907e-05	31	0	3258	1329
[OVER]	GO:0044262	cellular carbohydrate metabolic process	BIOLOGICAL_PROCESS	0.000321179	2.58907e-05	31	0	3258	1329
[OVER]	GO:0044770	cell cycle phase transition	BIOLOGICAL_PROCESS	0.000349681	2.83421e-05	38	1	3251	1328
[OVER]	GO:0004497	monooxygenase activity	MOLECULAR_FUNCTION	0.000349681	2.83421e-05	38	1	3251	1328
[OVER]	GO:0007018	microtubule-based movement	BIOLOGICAL_PROCESS	0.000349681	2.83421e-05	38	1	3251	1328
[OVER]	GO:0016798	hydrolase activity, acting on glycosyl bonds	MOLECULAR_FUNCTION	0.000349681	2.83421e-05	38	1	3251	1328
[OVER]	GO:0015267	channel activity	MOLECULAR_FUNCTION	0.000360472	2.9296e-05	44	2	3245	1327
[OVER]	GO:0022803	passive transmembrane transporter activity	MOLECULAR_FUNCTION	0.000360472	2.9296e-05	44	2	3245	1327
[OVER]	GO:0006955	immune response	BIOLOGICAL_PROCESS	0.000435144	3.54126e-05	54	4	3235	1325
[OVER]	GO:0030278	regulation of ossification	BIOLOGICAL_PROCESS	0.000442495	3.64488e-05	30	0	3259	1329
[OVER]	GO:0060249	anatomical structure homeostasis	BIOLOGICAL_PROCESS	0.000442495	3.64488e-05	30	0	3259	1329
[OVER]	GO:0098542	defense response to other organism	BIOLOGICAL_PROCESS	0.000442495	3.64488e-05	30	0	3259	1329
[OVER]	GO:0030099	myeloid cell differentiation	BIOLOGICAL_PROCESS	0.000442495	3.64488e-05	30	0	3259	1329
[OVER]	GO:0051216	cartilage development	BIOLOGICAL_PROCESS	0.000442495	3.64488e-05	30	0	3259	1329
[OVER]	GO:0032147	activation of protein kinase activity	BIOLOGICAL_PROCESS	0.000442495	3.64488e-05	30	0	3259	1329
[OVER]	GO:0009636	response to toxic substance	BIOLOGICAL_PROCESS	0.000442495	3.64488e-05	30	0	3259	1329
[OVER]	GO:0009617	response to bacterium	BIOLOGICAL_PROCESS	0.000442495	3.64488e-05	30	0	3259	1329
[OVER]	GO:0002521	leukocyte differentiation	BIOLOGICAL_PROCESS	0.000442495	3.64488e-05	30	0	3259	1329
[OVER]	GO:0008509	anion transmembrane transporter activity	MOLECULAR_FUNCTION	0.000471018	3.89537e-05	37	1	3252	1328
[OVER]	GO:0046700	heterocycle catabolic process	BIOLOGICAL_PROCESS	0.000471018	3.89537e-05	37	1	3252	1328
[OVER]	GO:0015629	actin cytoskeleton	CELLULAR_COMPONENT	0.000471018	3.89537e-05	37	1	3252	1328
[OVER]	GO:0031625	ubiquitin protein ligase binding	MOLECULAR_FUNCTION	0.000607476	5.13078e-05	29	0	3260	1329
[OVER]	GO:0032970	regulation of actin filament-based process	BIOLOGICAL_PROCESS	0.000607476	5.13078e-05	29	0	3260	1329
[OVER]	GO:0001817	regulation of cytokine production	BIOLOGICAL_PROCESS	0.000607476	5.13078e-05	29	0	3260	1329
[OVER]	GO:0001558	regulation of cell growth	BIOLOGICAL_PROCESS	0.000607476	5.13078e-05	29	0	3260	1329
[OVER]	GO:0050673	epithelial cell proliferation	BIOLOGICAL_PROCESS	0.000607476	5.13078e-05	29	0	3260	1329
[OVER]	GO:0019866	organelle inner membrane	CELLULAR_COMPONENT	0.000607476	5.13078e-05	29	0	3260	1329
[OVER]	GO:0060070	canonical Wnt signaling pathway	BIOLOGICAL_PROCESS	0.000607476	5.13078e-05	29	0	3260	1329
[OVER]	GO:0060627	regulation of vesicle-mediated transport	BIOLOGICAL_PROCESS	0.000607476	5.13078e-05	29	0	3260	1329
[OVER]	GO:0006816	calcium ion transport	BIOLOGICAL_PROCESS	0.000607476	5.13078e-05	29	0	3260	1329
[OVER]	GO:0006913	nucleocytoplasmic transport	BIOLOGICAL_PROCESS	0.000607476	5.13078e-05	29	0	3260	1329
[OVER]	GO:0007005	mitochondrion organization	BIOLOGICAL_PROCESS	0.000607476	5.13078e-05	29	0	3260	1329
[OVER]	GO:0051169	nuclear transport	BIOLOGICAL_PROCESS	0.000607476	5.13078e-05	29	0	3260	1329
[OVER]	GO:0007610	behavior	BIOLOGICAL_PROCESS	0.000607476	5.13078e-05	29	0	3260	1329
[OVER]	GO:0006310	DNA recombination	BIOLOGICAL_PROCESS	0.000607476	5.13078e-05	29	0	3260	1329
[OVER]	GO:0048193	Golgi vesicle transport	BIOLOGICAL_PROCESS	0.000607476	5.13078e-05	29	0	3260	1329
[OVER]	GO:0099536	synaptic signaling	BIOLOGICAL_PROCESS	0.000607476	5.13078e-05	29	0	3260	1329
[OVER]	GO:0015291	secondary active transmembrane transporter activity	MOLECULAR_FUNCTION	0.000628531	5.35009e-05	36	1	3253	1328
[OVER]	GO:0005506	iron ion binding	MOLECULAR_FUNCTION	0.000628531	5.34109e-05	42	2	3247	1327
[OVER]	GO:0006954	inflammatory response	BIOLOGICAL_PROCESS	0.000628531	5.35009e-05	36	1	3253	1328
[OVER]	GO:0016853	isomerase activity	MOLECULAR_FUNCTION	0.000628531	5.35009e-05	36	1	3253	1328
[OVER]	GO:0046906	tetrapyrrole binding	MOLECULAR_FUNCTION	0.000628531	5.35009e-05	36	1	3253	1328
[OVER]	GO:0044270	cellular nitrogen compound catabolic process	BIOLOGICAL_PROCESS	0.000628531	5.35009e-05	36	1	3253	1328
[OVER]	GO:0036477	somatodendritic compartment	CELLULAR_COMPONENT	0.000832292	7.2218e-05	28	0	3261	1329
[OVER]	GO:0098794	postsynapse	CELLULAR_COMPONENT	0.000832292	7.2218e-05	28	0	3261	1329
[OVER]	GO:1901293	nucleoside phosphate biosynthetic process	BIOLOGICAL_PROCESS	0.000832292	7.2218e-05	28	0	3261	1329
[OVER]	GO:0030424	axon	CELLULAR_COMPONENT	0.000832292	7.2218e-05	28	0	3261	1329
[OVER]	GO:0006790	sulfur compound metabolic process	BIOLOGICAL_PROCESS	0.000832292	7.2218e-05	28	0	3261	1329
[OVER]	GO:0050801	ion homeostasis	BIOLOGICAL_PROCESS	0.000832292	7.20082e-05	41	2	3248	1327
[OVER]	GO:0005216	ion channel activity	MOLECULAR_FUNCTION	0.000832292	7.20082e-05	41	2	3248	1327
[OVER]	GO:1902903	regulation of supramolecular fiber organization	BIOLOGICAL_PROCESS	0.000832292	7.2218e-05	28	0	3261	1329
[OVER]	GO:0034248	regulation of cellular amide metabolic process	BIOLOGICAL_PROCESS	0.000832292	7.2218e-05	28	0	3261	1329
[OVER]	GO:0060348	bone development	BIOLOGICAL_PROCESS	0.000832292	7.2218e-05	28	0	3261	1329
[OVER]	GO:0005635	nuclear envelope	CELLULAR_COMPONENT	0.000832292	7.2218e-05	28	0	3261	1329
[OVER]	GO:0022411	cellular component disassembly	BIOLOGICAL_PROCESS	0.000832292	7.2218e-05	28	0	3261	1329
[OVER]	GO:0010975	regulation of neuron projection development	BIOLOGICAL_PROCESS	0.000832292	7.2218e-05	28	0	3261	1329
[OVER]	GO:0006066	alcohol metabolic process	BIOLOGICAL_PROCESS	0.000832292	7.2218e-05	28	0	3261	1329
[OVER]	GO:0055082	cellular chemical homeostasis	BIOLOGICAL_PROCESS	0.000832292	7.20082e-05	41	2	3248	1327
[OVER]	GO:0090066	regulation of anatomical structure size	BIOLOGICAL_PROCESS	0.000843019	7.34269e-05	35	1	3254	1328
[OVER]	GO:0048545	response to steroid hormone	BIOLOGICAL_PROCESS	0.000843019	7.34269e-05	35	1	3254	1328
[OVER]	GO:0046649	lymphocyte activation	BIOLOGICAL_PROCESS	0.000843019	7.34269e-05	35	1	3254	1328
[OVER]	GO:0043086	negative regulation of catalytic activity	BIOLOGICAL_PROCESS	0.00102418	8.93188e-05	81	11	3208	1318
[OVER]	GO:0098771	inorganic ion homeostasis	BIOLOGICAL_PROCESS	0.00110781	9.69776e-05	40	2	3249	1327
[OVER]	GO:0008017	microtubule binding	MOLECULAR_FUNCTION	0.00110781	9.69776e-05	40	2	3249	1327
[OVER]	GO:0007059	chromosome segregation	BIOLOGICAL_PROCESS	0.00110781	9.69776e-05	40	2	3249	1327
[OVER]	GO:0032956	regulation of actin cytoskeleton organization	BIOLOGICAL_PROCESS	0.00112163	0.000101641	27	0	3262	1329
[OVER]	GO:0006732	coenzyme metabolic process	BIOLOGICAL_PROCESS	0.00112163	0.000101641	27	0	3262	1329
[OVER]	GO:0048232	male gamete generation	BIOLOGICAL_PROCESS	0.00112163	0.000101641	27	0	3262	1329
[OVER]	GO:0031347	regulation of defense response	BIOLOGICAL_PROCESS	0.00112163	0.000101641	27	0	3262	1329
[OVER]	GO:0098656	anion transmembrane transport	BIOLOGICAL_PROCESS	0.00112163	0.000100697	34	1	3255	1328
[OVER]	GO:0001649	osteoblast differentiation	BIOLOGICAL_PROCESS	0.00112163	0.000101641	27	0	3262	1329
[OVER]	GO:0009314	response to radiation	BIOLOGICAL_PROCESS	0.00112163	0.000101641	27	0	3262	1329
[OVER]	GO:0034329	cell junction assembly	BIOLOGICAL_PROCESS	0.00112163	0.000101641	27	0	3262	1329
[OVER]	GO:0006887	exocytosis	BIOLOGICAL_PROCESS	0.00112163	0.000101641	27	0	3262	1329
[OVER]	GO:0098916	anterograde trans-synaptic signaling	BIOLOGICAL_PROCESS	0.00112163	0.000101641	27	0	3262	1329
[OVER]	GO:1901342	regulation of vasculature development	BIOLOGICAL_PROCESS	0.00112163	0.000101641	27	0	3262	1329
[OVER]	GO:0031984	organelle subcompartment	CELLULAR_COMPONENT	0.00112163	0.000101641	27	0	3262	1329
[OVER]	GO:0010639	negative regulation of organelle organization	BIOLOGICAL_PROCESS	0.00112163	0.000100697	34	1	3255	1328
[OVER]	GO:0034655	nucleobase-containing compound catabolic process	BIOLOGICAL_PROCESS	0.00112163	0.000100697	34	1	3255	1328
[OVER]	GO:0022836	gated channel activity	MOLECULAR_FUNCTION	0.00112163	0.000100697	34	1	3255	1328
[OVER]	GO:0034762	regulation of transmembrane transport	BIOLOGICAL_PROCESS	0.00112163	0.000101641	27	0	3262	1329
[OVER]	GO:0034470	ncRNA processing	BIOLOGICAL_PROCESS	0.00112163	0.000101641	27	0	3262	1329
[OVER]	GO:0051090	regulation of DNA-binding transcription factor activity	BIOLOGICAL_PROCESS	0.00112163	0.000101641	27	0	3262	1329
[OVER]	GO:0004713	protein tyrosine kinase activity	MOLECULAR_FUNCTION	0.00112163	0.000101641	27	0	3262	1329
[OVER]	GO:0006261	DNA-dependent DNA replication	BIOLOGICAL_PROCESS	0.00112163	0.000101641	27	0	3262	1329
[OVER]	GO:0009986	cell surface	CELLULAR_COMPONENT	0.00112163	0.000101641	27	0	3262	1329
[OVER]	GO:0007268	chemical synaptic transmission	BIOLOGICAL_PROCESS	0.00112163	0.000101641	27	0	3262	1329
[OVER]	GO:0009896	positive regulation of catabolic process	BIOLOGICAL_PROCESS	0.00112163	0.000101641	27	0	3262	1329
[OVER]	GO:0046873	metal ion transmembrane transporter activity	MOLECULAR_FUNCTION	0.00112163	0.000100697	34	1	3255	1328
[OVER]	GO:0099537	trans-synaptic signaling	BIOLOGICAL_PROCESS	0.00112163	0.000101641	27	0	3262	1329
[OVER]	GO:0031012	extracellular matrix	CELLULAR_COMPONENT	0.00112163	0.000101641	27	0	3262	1329
[OVER]	GO:0032386	regulation of intracellular transport	BIOLOGICAL_PROCESS	0.00112163	0.000101641	27	0	3262	1329
[OVER]	GO:0070646	protein modification by small protein removal	BIOLOGICAL_PROCESS	0.00112163	0.000101641	27	0	3262	1329
[OVER]	GO:0006091	generation of precursor metabolites and energy	BIOLOGICAL_PROCESS	0.00143617	0.00013046	39	2	3250	1327
[OVER]	GO:0055080	cation homeostasis	BIOLOGICAL_PROCESS	0.00143617	0.00013046	39	2	3250	1327
[OVER]	GO:0050865	regulation of cell activation	BIOLOGICAL_PROCESS	0.00150987	0.000137985	33	1	3256	1328
[OVER]	GO:0030545	receptor regulator activity	MOLECULAR_FUNCTION	0.00150987	0.000137985	33	1	3256	1328
[OVER]	GO:0002252	immune effector process	BIOLOGICAL_PROCESS	0.00150987	0.000137985	33	1	3256	1328
[OVER]	GO:0020037	heme binding	MOLECULAR_FUNCTION	0.00150987	0.000137985	33	1	3256	1328
[OVER]	GO:0002694	regulation of leukocyte activation	BIOLOGICAL_PROCESS	0.00150987	0.000137985	33	1	3256	1328
[OVER]	GO:0030258	lipid modification	BIOLOGICAL_PROCESS	0.0015248	0.000143039	26	0	3263	1329
[OVER]	GO:0050839	cell adhesion molecule binding	MOLECULAR_FUNCTION	0.0015248	0.000143039	26	0	3263	1329
[OVER]	GO:0001505	regulation of neurotransmitter levels	BIOLOGICAL_PROCESS	0.0015248	0.000143039	26	0	3263	1329
[OVER]	GO:0010256	endomembrane system organization	BIOLOGICAL_PROCESS	0.0015248	0.000143039	26	0	3263	1329
[OVER]	GO:0060537	muscle tissue development	BIOLOGICAL_PROCESS	0.0015248	0.000143039	26	0	3263	1329
[OVER]	GO:0045087	innate immune response	BIOLOGICAL_PROCESS	0.0015248	0.000143039	26	0	3263	1329
[OVER]	GO:0016579	protein deubiquitination	BIOLOGICAL_PROCESS	0.0015248	0.000143039	26	0	3263	1329
[OVER]	GO:0005819	spindle	CELLULAR_COMPONENT	0.0015248	0.000143039	26	0	3263	1329
[OVER]	GO:0090132	epithelium migration	BIOLOGICAL_PROCESS	0.0015248	0.000143039	26	0	3263	1329
[OVER]	GO:0090130	tissue migration	BIOLOGICAL_PROCESS	0.0015248	0.000143039	26	0	3263	1329
[OVER]	GO:0009165	nucleotide biosynthetic process	BIOLOGICAL_PROCESS	0.0015248	0.000143039	26	0	3263	1329
[OVER]	GO:0010631	epithelial cell migration	BIOLOGICAL_PROCESS	0.0015248	0.000143039	26	0	3263	1329
[OVER]	GO:0051188	cofactor biosynthetic process	BIOLOGICAL_PROCESS	0.0015248	0.000143039	26	0	3263	1329
[OVER]	GO:0051348	negative regulation of transferase activity	BIOLOGICAL_PROCESS	0.0015248	0.000143039	26	0	3263	1329
[OVER]	GO:0022412	cellular process involved in reproduction in multicellular organism	BIOLOGICAL_PROCESS	0.0015248	0.000143039	26	0	3263	1329
[OVER]	GO:0051051	negative regulation of transport	BIOLOGICAL_PROCESS	0.0015248	0.000143039	26	0	3263	1329
[OVER]	GO:0043161	proteasome-mediated ubiquitin-dependent protein catabolic process	BIOLOGICAL_PROCESS	0.0015248	0.000143039	26	0	3263	1329
[OVER]	GO:0007600	sensory perception	BIOLOGICAL_PROCESS	0.0015248	0.000143039	26	0	3263	1329
[OVER]	GO:0006282	regulation of DNA repair	BIOLOGICAL_PROCESS	0.0015248	0.000143039	26	0	3263	1329
[OVER]	GO:0000151	ubiquitin ligase complex	CELLULAR_COMPONENT	0.0015248	0.000143039	26	0	3263	1329
[OVER]	GO:0044282	small molecule catabolic process	BIOLOGICAL_PROCESS	0.0015248	0.000143039	26	0	3263	1329
[OVER]	GO:0032392	DNA geometric change	BIOLOGICAL_PROCESS	0.0015248	0.000143039	26	0	3263	1329
[OVER]	GO:0005615	extracellular space	CELLULAR_COMPONENT	0.00185672	0.00017438	74	10	3215	1319
[OVER]	GO:0030246	carbohydrate binding	MOLECULAR_FUNCTION	0.00198796	0.000186925	43	3	3246	1326
[OVER]	GO:0000287	magnesium ion binding	MOLECULAR_FUNCTION	0.00199752	0.000188922	32	1	3257	1328
[OVER]	GO:0044772	mitotic cell cycle phase transition	BIOLOGICAL_PROCESS	0.00199752	0.000188922	32	1	3257	1328
[OVER]	GO:0030546	signaling receptor activator activity	MOLECULAR_FUNCTION	0.00199752	0.000188922	32	1	3257	1328
[OVER]	GO:0015698	inorganic anion transport	BIOLOGICAL_PROCESS	0.00199752	0.000188922	32	1	3257	1328
[OVER]	GO:0048018	receptor ligand activity	MOLECULAR_FUNCTION	0.00199752	0.000188922	32	1	3257	1328
[OVER]	GO:0061458	reproductive system development	BIOLOGICAL_PROCESS	0.00204267	0.00020128	25	0	3264	1329
[OVER]	GO:0036459	thiol-dependent ubiquitinyl hydrolase activity	MOLECULAR_FUNCTION	0.00204267	0.00020128	25	0	3264	1329
[OVER]	GO:0098791	Golgi subcompartment	CELLULAR_COMPONENT	0.00204267	0.00020128	25	0	3264	1329
[OVER]	GO:0016042	lipid catabolic process	BIOLOGICAL_PROCESS	0.00204267	0.00020128	25	0	3264	1329
[OVER]	GO:0048568	embryonic organ development	BIOLOGICAL_PROCESS	0.00204267	0.00020128	25	0	3264	1329
[OVER]	GO:0060271	cilium assembly	BIOLOGICAL_PROCESS	0.00204267	0.00020128	25	0	3264	1329
[OVER]	GO:1903706	regulation of hemopoiesis	BIOLOGICAL_PROCESS	0.00204267	0.00020128	25	0	3264	1329
[OVER]	GO:0043405	regulation of MAP kinase activity	BIOLOGICAL_PROCESS	0.00204267	0.00020128	25	0	3264	1329
[OVER]	GO:0019783	ubiquitin-like protein-specific protease activity	MOLECULAR_FUNCTION	0.00204267	0.00020128	25	0	3264	1329
[OVER]	GO:0101005	ubiquitinyl hydrolase activity	MOLECULAR_FUNCTION	0.00204267	0.00020128	25	0	3264	1329
[OVER]	GO:0050678	regulation of epithelial cell proliferation	BIOLOGICAL_PROCESS	0.00204267	0.00020128	25	0	3264	1329
[OVER]	GO:0000398	mRNA splicing, via spliceosome	BIOLOGICAL_PROCESS	0.00204267	0.00020128	25	0	3264	1329
[OVER]	GO:0044782	cilium organization	BIOLOGICAL_PROCESS	0.00204267	0.00020128	25	0	3264	1329
[OVER]	GO:0000323	lytic vacuole	CELLULAR_COMPONENT	0.00204267	0.00020128	25	0	3264	1329
[OVER]	GO:0001655	urogenital system development	BIOLOGICAL_PROCESS	0.00204267	0.00020128	25	0	3264	1329
[OVER]	GO:0000377	RNA splicing, via transesterification reactions with bulged adenosine as nucleophile	BIOLOGICAL_PROCESS	0.00204267	0.00020128	25	0	3264	1329
[OVER]	GO:0000375	RNA splicing, via transesterification reactions	BIOLOGICAL_PROCESS	0.00204267	0.00020128	25	0	3264	1329
[OVER]	GO:0005764	lysosome	CELLULAR_COMPONENT	0.00204267	0.00020128	25	0	3264	1329
[OVER]	GO:1901652	response to peptide	BIOLOGICAL_PROCESS	0.00204267	0.00020128	25	0	3264	1329
[OVER]	GO:0048608	reproductive structure development	BIOLOGICAL_PROCESS	0.00204267	0.00020128	25	0	3264	1329
[OVER]	GO:0035335	peptidyl-tyrosine dephosphorylation	BIOLOGICAL_PROCESS	0.00204267	0.00020128	25	0	3264	1329
[OVER]	GO:0005667	transcription factor complex	CELLULAR_COMPONENT	0.00204267	0.00020128	25	0	3264	1329
[OVER]	GO:0110148	biomineralization	BIOLOGICAL_PROCESS	0.00204267	0.00020128	25	0	3264	1329
[OVER]	GO:0016607	nuclear speck	CELLULAR_COMPONENT	0.00204267	0.00020128	25	0	3264	1329
[OVER]	GO:0060828	regulation of canonical Wnt signaling pathway	BIOLOGICAL_PROCESS	0.00204267	0.00020128	25	0	3264	1329
[OVER]	GO:0051056	regulation of small GTPase mediated signal transduction	BIOLOGICAL_PROCESS	0.00204267	0.00020128	25	0	3264	1329
[OVER]	GO:0004725	protein tyrosine phosphatase activity	MOLECULAR_FUNCTION	0.00204267	0.00020128	25	0	3264	1329
[OVER]	GO:0043235	receptor complex	CELLULAR_COMPONENT	0.00204267	0.00020128	25	0	3264	1329
[OVER]	GO:0031214	biomineral tissue development	BIOLOGICAL_PROCESS	0.00204267	0.00020128	25	0	3264	1329
[OVER]	GO:0032535	regulation of cellular component size	BIOLOGICAL_PROCESS	0.00204267	0.00020128	25	0	3264	1329
[OVER]	GO:0045862	positive regulation of proteolysis	BIOLOGICAL_PROCESS	0.00204267	0.00020128	25	0	3264	1329
[OVER]	GO:0002790	peptide secretion	BIOLOGICAL_PROCESS	0.00204267	0.00020128	25	0	3264	1329
[OVER]	GO:0007283	spermatogenesis	BIOLOGICAL_PROCESS	0.00204267	0.00020128	25	0	3264	1329
[OVER]	GO:0003729	mRNA binding	MOLECULAR_FUNCTION	0.00204267	0.00020128	25	0	3264	1329
[OVER]	GO:0007389	pattern specification process	BIOLOGICAL_PROCESS	0.00204267	0.00020128	25	0	3264	1329
[OVER]	GO:0031098	stress-activated protein kinase signaling cascade	BIOLOGICAL_PROCESS	0.00204267	0.00020128	25	0	3264	1329
[OVER]	GO:0016569	covalent chromatin modification	BIOLOGICAL_PROCESS	0.00238228	0.000235267	37	2	3252	1327
[OVER]	GO:0016570	histone modification	BIOLOGICAL_PROCESS	0.00238228	0.000235267	37	2	3252	1327
[OVER]	GO:0140098	catalytic activity, acting on RNA	MOLECULAR_FUNCTION	0.00239395	0.000236683	47	4	3242	1325
[OVER]	GO:0004553	hydrolase activity, hydrolyzing O-glycosyl compounds	MOLECULAR_FUNCTION	0.00260814	0.000258433	31	1	3258	1328
[OVER]	GO:0009755	hormone-mediated signaling pathway	BIOLOGICAL_PROCESS	0.00260814	0.000258433	31	1	3258	1328
[OVER]	GO:0043543	protein acylation	BIOLOGICAL_PROCESS	0.00277502	0.000283209	24	0	3265	1329
[OVER]	GO:0150063	visual system development	BIOLOGICAL_PROCESS	0.00277502	0.000283209	24	0	3265	1329
[OVER]	GO:0098552	side of membrane	CELLULAR_COMPONENT	0.00277502	0.000283209	24	0	3265	1329
[OVER]	GO:0072001	renal system development	BIOLOGICAL_PROCESS	0.00277502	0.000283209	24	0	3265	1329
[OVER]	GO:0051962	positive regulation of nervous system development	BIOLOGICAL_PROCESS	0.00277502	0.000283209	24	0	3265	1329
[OVER]	GO:0019898	extrinsic component of membrane	CELLULAR_COMPONENT	0.00277502	0.000283209	24	0	3265	1329
[OVER]	GO:0017171	serine hydrolase activity	MOLECULAR_FUNCTION	0.00277502	0.000283209	24	0	3265	1329
[OVER]	GO:1990778	protein localization to cell periphery	BIOLOGICAL_PROCESS	0.00277502	0.000283209	24	0	3265	1329
[OVER]	GO:0001654	eye development	BIOLOGICAL_PROCESS	0.00277502	0.000283209	24	0	3265	1329
[OVER]	GO:0042176	regulation of protein catabolic process	BIOLOGICAL_PROCESS	0.00277502	0.000283209	24	0	3265	1329
[OVER]	GO:0048880	sensory system development	BIOLOGICAL_PROCESS	0.00277502	0.000283209	24	0	3265	1329
[OVER]	GO:0040013	negative regulation of locomotion	BIOLOGICAL_PROCESS	0.00277502	0.000283209	24	0	3265	1329
[OVER]	GO:0042692	muscle cell differentiation	BIOLOGICAL_PROCESS	0.00277502	0.000283209	24	0	3265	1329
[OVER]	GO:0051258	protein polymerization	BIOLOGICAL_PROCESS	0.00277502	0.000283209	24	0	3265	1329
[OVER]	GO:0007051	spindle organization	BIOLOGICAL_PROCESS	0.00277502	0.000283209	24	0	3265	1329
[OVER]	GO:0016825	hydrolase activity, acting on acid phosphorus-nitrogen bonds	MOLECULAR_FUNCTION	0.00277502	0.000283209	24	0	3265	1329
[OVER]	GO:0051091	positive regulation of DNA-binding transcription factor activity	BIOLOGICAL_PROCESS	0.00277502	0.000283209	24	0	3265	1329
[OVER]	GO:0007548	sex differentiation	BIOLOGICAL_PROCESS	0.00277502	0.000283209	24	0	3265	1329
[OVER]	GO:0015931	nucleobase-containing compound transport	BIOLOGICAL_PROCESS	0.00277502	0.000283209	24	0	3265	1329
[OVER]	GO:0002683	negative regulation of immune system process	BIOLOGICAL_PROCESS	0.00277502	0.000283209	24	0	3265	1329
[OVER]	GO:0009991	response to extracellular stimulus	BIOLOGICAL_PROCESS	0.00277502	0.000283209	24	0	3265	1329
[OVER]	GO:0007249	I-kappaB kinase/NF-kappaB signaling	BIOLOGICAL_PROCESS	0.00277502	0.000283209	24	0	3265	1329
[OVER]	GO:0007281	germ cell development	BIOLOGICAL_PROCESS	0.00277502	0.000283209	24	0	3265	1329
[OVER]	GO:0044297	cell body	CELLULAR_COMPONENT	0.00277502	0.000283209	24	0	3265	1329
[OVER]	GO:0015748	organophosphate ester transport	BIOLOGICAL_PROCESS	0.00277502	0.000283209	24	0	3265	1329
[OVER]	GO:0062197	cellular response to chemical stress	BIOLOGICAL_PROCESS	0.00277502	0.000283209	24	0	3265	1329
[OVER]	GO:0071902	positive regulation of protein serine/threonine kinase activity	BIOLOGICAL_PROCESS	0.00277502	0.000283209	24	0	3265	1329
[OVER]	GO:0006873	cellular ion homeostasis	BIOLOGICAL_PROCESS	0.00308331	0.00031535	36	2	3253	1327
[OVER]	GO:0007229	integrin-mediated signaling pathway	BIOLOGICAL_PROCESS	0.00308331	0.00031535	36	2	3253	1327
[OVER]	GO:0050776	regulation of immune response	BIOLOGICAL_PROCESS	0.00344219	0.000353191	30	1	3259	1328
[OVER]	GO:0071383	cellular response to steroid hormone stimulus	BIOLOGICAL_PROCESS	0.00344219	0.000353191	30	1	3259	1328
[OVER]	GO:0045787	positive regulation of cell cycle	BIOLOGICAL_PROCESS	0.00344219	0.000353191	30	1	3259	1328
[OVER]	GO:2000146	negative regulation of cell motility	BIOLOGICAL_PROCESS	0.00377803	0.000398453	23	0	3266	1329
[OVER]	GO:0006650	glycerophospholipid metabolic process	BIOLOGICAL_PROCESS	0.00377803	0.000398453	23	0	3266	1329
[OVER]	GO:0042254	ribosome biogenesis	BIOLOGICAL_PROCESS	0.00377803	0.000398453	23	0	3266	1329
[OVER]	GO:0042445	hormone metabolic process	BIOLOGICAL_PROCESS	0.00377803	0.000398453	23	0	3266	1329
[OVER]	GO:0048511	rhythmic process	BIOLOGICAL_PROCESS	0.00377803	0.000398453	23	0	3266	1329
[OVER]	GO:0097237	cellular response to toxic substance	BIOLOGICAL_PROCESS	0.00377803	0.000398453	23	0	3266	1329
[OVER]	GO:0031331	positive regulation of cellular catabolic process	BIOLOGICAL_PROCESS	0.00377803	0.000398453	23	0	3266	1329
[OVER]	GO:0030098	lymphocyte differentiation	BIOLOGICAL_PROCESS	0.00377803	0.000398453	23	0	3266	1329
[OVER]	GO:0035592	establishment of protein localization to extracellular region	BIOLOGICAL_PROCESS	0.00377803	0.000398453	23	0	3266	1329
[OVER]	GO:0048872	homeostasis of number of cells	BIOLOGICAL_PROCESS	0.00377803	0.000398453	23	0	3266	1329
[OVER]	GO:0009306	protein secretion	BIOLOGICAL_PROCESS	0.00377803	0.000398453	23	0	3266	1329
[OVER]	GO:0035690	cellular response to drug	BIOLOGICAL_PROCESS	0.00377803	0.000398453	23	0	3266	1329
[OVER]	GO:0060485	mesenchyme development	BIOLOGICAL_PROCESS	0.00377803	0.000398453	23	0	3266	1329
[OVER]	GO:0071692	protein localization to extracellular region	BIOLOGICAL_PROCESS	0.00377803	0.000398453	23	0	3266	1329
[OVER]	GO:0051271	negative regulation of cellular component movement	BIOLOGICAL_PROCESS	0.00377803	0.000398453	23	0	3266	1329
[OVER]	GO:0009792	embryo development ending in birth or egg hatching	BIOLOGICAL_PROCESS	0.00377803	0.000398453	23	0	3266	1329
[OVER]	GO:0019199	transmembrane receptor protein kinase activity	MOLECULAR_FUNCTION	0.00377803	0.000398453	23	0	3266	1329
[OVER]	GO:0008236	serine-type peptidase activity	MOLECULAR_FUNCTION	0.00377803	0.000398453	23	0	3266	1329
[OVER]	GO:0008202	steroid metabolic process	BIOLOGICAL_PROCESS	0.00377803	0.000398453	23	0	3266	1329
[OVER]	GO:0007517	muscle organ development	BIOLOGICAL_PROCESS	0.00377803	0.000398453	23	0	3266	1329
[OVER]	GO:1903311	regulation of mRNA metabolic process	BIOLOGICAL_PROCESS	0.00377803	0.000398453	23	0	3266	1329
[OVER]	GO:0031300	intrinsic component of organelle membrane	CELLULAR_COMPONENT	0.00377803	0.000398453	23	0	3266	1329
[OVER]	GO:0031252	cell leading edge	CELLULAR_COMPONENT	0.00377803	0.000398453	23	0	3266	1329
[OVER]	GO:0043009	chordate embryonic development	BIOLOGICAL_PROCESS	0.00377803	0.000398453	23	0	3266	1329
[OVER]	GO:0031032	actomyosin structure organization	BIOLOGICAL_PROCESS	0.00377803	0.000398453	23	0	3266	1329
[OVER]	GO:0033673	negative regulation of kinase activity	BIOLOGICAL_PROCESS	0.00377803	0.000398453	23	0	3266	1329
[OVER]	GO:0030003	cellular cation homeostasis	BIOLOGICAL_PROCESS	0.0039984	0.000422133	35	2	3254	1327
[OVER]	GO:1901987	regulation of cell cycle phase transition	BIOLOGICAL_PROCESS	0.00456277	0.00048222	29	1	3260	1328
[OVER]	GO:0030162	regulation of proteolysis	BIOLOGICAL_PROCESS	0.00503251	0.000532418	65	9	3224	1320
[OVER]	GO:0005319	lipid transporter activity	MOLECULAR_FUNCTION	0.00519043	0.000560541	22	0	3267	1329
[OVER]	GO:0030282	bone mineralization	BIOLOGICAL_PROCESS	0.00519043	0.000560541	22	0	3267	1329
[OVER]	GO:0001822	kidney development	BIOLOGICAL_PROCESS	0.00519043	0.000560541	22	0	3267	1329
[OVER]	GO:0006469	negative regulation of protein kinase activity	BIOLOGICAL_PROCESS	0.00519043	0.000560541	22	0	3267	1329
[OVER]	GO:0050660	flavin adenine dinucleotide binding	MOLECULAR_FUNCTION	0.00519043	0.000560541	22	0	3267	1329
[OVER]	GO:0031503	protein-containing complex localization	BIOLOGICAL_PROCESS	0.00519043	0.000560541	22	0	3267	1329
[OVER]	GO:1901653	cellular response to peptide	BIOLOGICAL_PROCESS	0.00519043	0.000560541	22	0	3267	1329
[OVER]	GO:0006836	neurotransmitter transport	BIOLOGICAL_PROCESS	0.00519043	0.000560541	22	0	3267	1329
[OVER]	GO:0000775	chromosome, centromeric region	CELLULAR_COMPONENT	0.00519043	0.000560541	22	0	3267	1329
[OVER]	GO:0090287	regulation of cellular response to growth factor stimulus	BIOLOGICAL_PROCESS	0.00519043	0.000560541	22	0	3267	1329
[OVER]	GO:0051235	maintenance of location	BIOLOGICAL_PROCESS	0.00519043	0.000560541	22	0	3267	1329
[OVER]	GO:0010720	positive regulation of cell development	BIOLOGICAL_PROCESS	0.00519043	0.000560541	22	0	3267	1329
[OVER]	GO:0110053	regulation of actin filament organization	BIOLOGICAL_PROCESS	0.00519043	0.000560541	22	0	3267	1329
[OVER]	GO:0010769	regulation of cell morphogenesis involved in differentiation	BIOLOGICAL_PROCESS	0.00519043	0.000560541	22	0	3267	1329
[OVER]	GO:0034765	regulation of ion transmembrane transport	BIOLOGICAL_PROCESS	0.00519043	0.000560541	22	0	3267	1329
[OVER]	GO:0008194	UDP-glycosyltransferase activity	MOLECULAR_FUNCTION	0.00519043	0.000560541	22	0	3267	1329
[OVER]	GO:0051054	positive regulation of DNA metabolic process	BIOLOGICAL_PROCESS	0.00519043	0.000560541	22	0	3267	1329
[OVER]	GO:0007623	circadian rhythm	BIOLOGICAL_PROCESS	0.00519043	0.000560541	22	0	3267	1329
[OVER]	GO:0070588	calcium ion transmembrane transport	BIOLOGICAL_PROCESS	0.00519043	0.000560541	22	0	3267	1329
[OVER]	GO:0003713	transcription coactivator activity	MOLECULAR_FUNCTION	0.00519043	0.000560541	22	0	3267	1329
[OVER]	GO:0035091	phosphatidylinositol binding	MOLECULAR_FUNCTION	0.00607773	0.000657703	28	1	3261	1328
[OVER]	GO:0000910	cytokinesis	BIOLOGICAL_PROCESS	0.00607773	0.000657703	28	1	3261	1328
[OVER]	GO:0015672	monovalent inorganic cation transport	BIOLOGICAL_PROCESS	0.00694642	0.000753236	33	2	3256	1327
[OVER]	GO:0055065	metal ion homeostasis	BIOLOGICAL_PROCESS	0.00694642	0.000753236	33	2	3256	1327
[OVER]	GO:2000116	regulation of cysteine-type endopeptidase activity	BIOLOGICAL_PROCESS	0.00709882	0.000788497	21	0	3268	1329
[OVER]	GO:0036464	cytoplasmic ribonucleoprotein granule	CELLULAR_COMPONENT	0.00709882	0.000788497	21	0	3268	1329
[OVER]	GO:0006643	membrane lipid metabolic process	BIOLOGICAL_PROCESS	0.00709882	0.000788497	21	0	3268	1329
[OVER]	GO:0031667	response to nutrient levels	BIOLOGICAL_PROCESS	0.00709882	0.000788497	21	0	3268	1329
[OVER]	GO:0006417	regulation of translation	BIOLOGICAL_PROCESS	0.00709882	0.000788497	21	0	3268	1329
[OVER]	GO:0031334	positive regulation of protein-containing complex assembly	BIOLOGICAL_PROCESS	0.00709882	0.000788497	21	0	3268	1329
[OVER]	GO:0005743	mitochondrial inner membrane	CELLULAR_COMPONENT	0.00709882	0.000788497	21	0	3268	1329
[OVER]	GO:0072593	reactive oxygen species metabolic process	BIOLOGICAL_PROCESS	0.00709882	0.000788497	21	0	3268	1329
[OVER]	GO:0061695	transferase complex, transferring phosphorus-containing groups	CELLULAR_COMPONENT	0.00709882	0.000788497	21	0	3268	1329
[OVER]	GO:0010008	endosome membrane	CELLULAR_COMPONENT	0.00709882	0.000788497	21	0	3268	1329
[OVER]	GO:0031965	nuclear membrane	CELLULAR_COMPONENT	0.00709882	0.000788497	21	0	3268	1329
[OVER]	GO:0009108	coenzyme biosynthetic process	BIOLOGICAL_PROCESS	0.00709882	0.000788497	21	0	3268	1329
[OVER]	GO:0070371	ERK1 and ERK2 cascade	BIOLOGICAL_PROCESS	0.00709882	0.000788497	21	0	3268	1329
[OVER]	GO:0010721	negative regulation of cell development	BIOLOGICAL_PROCESS	0.00709882	0.000788497	21	0	3268	1329
[OVER]	GO:0007162	negative regulation of cell adhesion	BIOLOGICAL_PROCESS	0.00709882	0.000788497	21	0	3268	1329
[OVER]	GO:0035770	ribonucleoprotein granule	CELLULAR_COMPONENT	0.00709882	0.000788497	21	0	3268	1329
[OVER]	GO:0051092	positive regulation of NF-kappaB transcription factor activity	BIOLOGICAL_PROCESS	0.00709882	0.000788497	21	0	3268	1329
[OVER]	GO:0045765	regulation of angiogenesis	BIOLOGICAL_PROCESS	0.00709882	0.000788497	21	0	3268	1329
[OVER]	GO:0045785	positive regulation of cell adhesion	BIOLOGICAL_PROCESS	0.00709882	0.000788497	21	0	3268	1329
[OVER]	GO:0140297	DNA-binding transcription factor binding	MOLECULAR_FUNCTION	0.00709882	0.000788497	21	0	3268	1329
[OVER]	GO:0006323	DNA packaging	BIOLOGICAL_PROCESS	0.00709882	0.000788497	21	0	3268	1329
[OVER]	GO:0031301	integral component of organelle membrane	CELLULAR_COMPONENT	0.00709882	0.000788497	21	0	3268	1329
[OVER]	GO:0001227	DNA-binding transcription repressor activity, RNA polymerase II-specific	MOLECULAR_FUNCTION	0.00709882	0.000788497	21	0	3268	1329
[OVER]	GO:0001217	DNA-binding transcription repressor activity	MOLECULAR_FUNCTION	0.00709882	0.000788497	21	0	3268	1329
[OVER]	GO:0033044	regulation of chromosome organization	BIOLOGICAL_PROCESS	0.00802747	0.000896061	27	1	3262	1328
[OVER]	GO:0050900	leukocyte migration	BIOLOGICAL_PROCESS	0.00802747	0.000896061	27	1	3262	1328
[OVER]	GO:0000819	sister chromatid segregation	BIOLOGICAL_PROCESS	0.00802747	0.000896061	27	1	3262	1328
[OVER]	GO:0018205	peptidyl-lysine modification	BIOLOGICAL_PROCESS	0.00802747	0.000896061	27	1	3262	1328
[OVER]	GO:0006302	double-strand break repair	BIOLOGICAL_PROCESS	0.00802747	0.000896061	27	1	3262	1328
[OVER]	GO:0043657	host cell	CELLULAR_COMPONENT	0.00871625	0.000974863	37	3	3252	1326
[OVER]	GO:0018995	host cellular component	CELLULAR_COMPONENT	0.00871625	0.000974863	37	3	3252	1326
[OVER]	GO:0098813	nuclear chromosome segregation	BIOLOGICAL_PROCESS	0.00895832	0.00100391	32	2	3257	1327
[OVER]	GO:0060090	molecular adaptor activity	MOLECULAR_FUNCTION	0.00895832	0.00100391	32	2	3257	1327
[OVER]	GO:0050769	positive regulation of neurogenesis	BIOLOGICAL_PROCESS	0.00947807	0.00110906	20	0	3269	1329
[OVER]	GO:0030336	negative regulation of cell migration	BIOLOGICAL_PROCESS	0.00947807	0.00110906	20	0	3269	1329
[OVER]	GO:0032984	protein-containing complex disassembly	BIOLOGICAL_PROCESS	0.00947807	0.00110906	20	0	3269	1329
[OVER]	GO:0031570	DNA integrity checkpoint	BIOLOGICAL_PROCESS	0.00947807	0.00110906	20	0	3269	1329
[OVER]	GO:1903829	positive regulation of cellular protein localization	BIOLOGICAL_PROCESS	0.00947807	0.00110906	20	0	3269	1329
[OVER]	GO:0048562	embryonic organ morphogenesis	BIOLOGICAL_PROCESS	0.00947807	0.00110906	20	0	3269	1329
[OVER]	GO:0006414	translational elongation	BIOLOGICAL_PROCESS	0.00947807	0.00110906	20	0	3269	1329
[OVER]	GO:0043406	positive regulation of MAP kinase activity	BIOLOGICAL_PROCESS	0.00947807	0.00110906	20	0	3269	1329
[OVER]	GO:0017038	protein import	BIOLOGICAL_PROCESS	0.00947807	0.00110906	20	0	3269	1329
[OVER]	GO:0042063	gliogenesis	BIOLOGICAL_PROCESS	0.00947807	0.00110906	20	0	3269	1329
[OVER]	GO:0030178	negative regulation of Wnt signaling pathway	BIOLOGICAL_PROCESS	0.00947807	0.00110906	20	0	3269	1329
[OVER]	GO:1901617	organic hydroxy compound biosynthetic process	BIOLOGICAL_PROCESS	0.00947807	0.00110906	20	0	3269	1329
[OVER]	GO:0008081	phosphoric diester hydrolase activity	MOLECULAR_FUNCTION	0.00947807	0.00110906	20	0	3269	1329
[OVER]	GO:0061659	ubiquitin-like protein ligase activity	MOLECULAR_FUNCTION	0.00947807	0.00110906	20	0	3269	1329
[OVER]	GO:0035303	regulation of dephosphorylation	BIOLOGICAL_PROCESS	0.00947807	0.00110906	20	0	3269	1329
[OVER]	GO:0061630	ubiquitin protein ligase activity	MOLECULAR_FUNCTION	0.00947807	0.00110906	20	0	3269	1329
[OVER]	GO:0003002	regionalization	BIOLOGICAL_PROCESS	0.00947807	0.00110906	20	0	3269	1329
[OVER]	GO:0042626	ATPase-coupled transmembrane transporter activity	MOLECULAR_FUNCTION	0.00947807	0.00110906	20	0	3269	1329
[OVER]	GO:0048705	skeletal system morphogenesis	BIOLOGICAL_PROCESS	0.00947807	0.00110906	20	0	3269	1329
[OVER]	GO:0048762	mesenchymal cell differentiation	BIOLOGICAL_PROCESS	0.00947807	0.00110906	20	0	3269	1329
[OVER]	GO:0070372	regulation of ERK1 and ERK2 cascade	BIOLOGICAL_PROCESS	0.00947807	0.00110906	20	0	3269	1329
[OVER]	GO:0005996	monosaccharide metabolic process	BIOLOGICAL_PROCESS	0.00947807	0.00110906	20	0	3269	1329
[OVER]	GO:0015399	primary active transmembrane transporter activity	MOLECULAR_FUNCTION	0.00947807	0.00110906	20	0	3269	1329
[OVER]	GO:0009451	RNA modification	BIOLOGICAL_PROCESS	0.00947807	0.00110906	20	0	3269	1329
[OVER]	GO:0030900	forebrain development	BIOLOGICAL_PROCESS	0.00947807	0.00110906	20	0	3269	1329
[OVER]	GO:0045111	intermediate filament cytoskeleton	CELLULAR_COMPONENT	0.00947807	0.00110906	20	0	3269	1329
[OVER]	GO:0071560	cellular response to transforming growth factor beta stimulus	BIOLOGICAL_PROCESS	0.00947807	0.00110906	20	0	3269	1329
[OVER]	GO:0051146	striated muscle cell differentiation	BIOLOGICAL_PROCESS	0.00947807	0.00110906	20	0	3269	1329
[OVER]	GO:0034504	protein localization to nucleus	BIOLOGICAL_PROCESS	0.00947807	0.00110906	20	0	3269	1329
[OVER]	GO:0071559	response to transforming growth factor beta	BIOLOGICAL_PROCESS	0.00947807	0.00110906	20	0	3269	1329
[OVER]	GO:0034599	cellular response to oxidative stress	BIOLOGICAL_PROCESS	0.00947807	0.00110906	20	0	3269	1329
[OVER]	GO:0045927	positive regulation of growth	BIOLOGICAL_PROCESS	0.00947807	0.00110906	20	0	3269	1329
[OVER]	GO:0014706	striated muscle tissue development	BIOLOGICAL_PROCESS	0.00947807	0.00110906	20	0	3269	1329
[OVER]	GO:0043281	regulation of cysteine-type endopeptidase activity involved in apoptotic process	BIOLOGICAL_PROCESS	0.00947807	0.00110906	20	0	3269	1329
[OVER]	GO:0051403	stress-activated MAPK cascade	BIOLOGICAL_PROCESS	0.00947807	0.00110906	20	0	3269	1329
[OVER]	GO:0019318	hexose metabolic process	BIOLOGICAL_PROCESS	0.00947807	0.00110906	20	0	3269	1329
[OVER]	GO:0010952	positive regulation of peptidase activity	BIOLOGICAL_PROCESS	0.00947807	0.00110906	20	0	3269	1329
[OVER]	GO:0071826	ribonucleoprotein complex subunit organization	BIOLOGICAL_PROCESS	0.00947807	0.00110906	20	0	3269	1329
[OVER]	GO:0032271	regulation of protein polymerization	BIOLOGICAL_PROCESS	0.00947807	0.00110906	20	0	3269	1329
[OVER]	GO:0002443	leukocyte mediated immunity	BIOLOGICAL_PROCESS	0.00947807	0.00110906	20	0	3269	1329
[OVER]	GO:0045667	regulation of osteoblast differentiation	BIOLOGICAL_PROCESS	0.00947807	0.00110906	20	0	3269	1329
[OVER]	GO:0043010	camera-type eye development	BIOLOGICAL_PROCESS	0.00947807	0.00110906	20	0	3269	1329
[OVER]	GO:0001228	DNA-binding transcription activator activity, RNA polymerase II-specific	MOLECULAR_FUNCTION	0.00947807	0.00110906	20	0	3269	1329
[OVER]	GO:0015849	organic acid transport	BIOLOGICAL_PROCESS	0.00947807	0.00110906	20	0	3269	1329
[OVER]	GO:0001216	DNA-binding transcription activator activity	MOLECULAR_FUNCTION	0.00947807	0.00110906	20	0	3269	1329
[OVER]	GO:0006401	RNA catabolic process	BIOLOGICAL_PROCESS	0.0103624	0.00121938	26	1	3263	1328
[OVER]	GO:0043401	steroid hormone mediated signaling pathway	BIOLOGICAL_PROCESS	0.0103624	0.00121938	26	1	3263	1328
[OVER]	GO:0042110	T cell activation	BIOLOGICAL_PROCESS	0.0103624	0.00121938	26	1	3263	1328
[OVER]	GO:0015103	inorganic anion transmembrane transporter activity	MOLECULAR_FUNCTION	0.0103624	0.00121938	26	1	3263	1328
[OVER]	GO:0016614	oxidoreductase activity, acting on CH-OH group of donors	MOLECULAR_FUNCTION	0.0103624	0.00121938	26	1	3263	1328
[OVER]	GO:0018209	peptidyl-serine modification	BIOLOGICAL_PROCESS	0.0103624	0.00121938	26	1	3263	1328
[OVER]	GO:0043656	host intracellular region	CELLULAR_COMPONENT	0.010786	0.00127634	36	3	3253	1326
[OVER]	GO:0042025	host cell nucleus	CELLULAR_COMPONENT	0.010786	0.00127634	36	3	3253	1326
[OVER]	GO:0033648	host intracellular membrane-bounded organelle	CELLULAR_COMPONENT	0.010786	0.00127634	36	3	3253	1326
[OVER]	GO:0033643	host cell part	CELLULAR_COMPONENT	0.010786	0.00127634	36	3	3253	1326
[OVER]	GO:0033647	host intracellular organelle	CELLULAR_COMPONENT	0.010786	0.00127634	36	3	3253	1326
[OVER]	GO:0033646	host intracellular part	CELLULAR_COMPONENT	0.010786	0.00127634	36	3	3253	1326
[OVER]	GO:0006875	cellular metal ion homeostasis	BIOLOGICAL_PROCESS	0.0112576	0.00133585	31	2	3258	1327
[OVER]	GO:0015077	monovalent inorganic cation transmembrane transporter activity	MOLECULAR_FUNCTION	0.0112576	0.00133585	31	2	3258	1327
[OVER]	GO:0140014	mitotic nuclear division	BIOLOGICAL_PROCESS	0.0112576	0.00133585	31	2	3258	1327
[OVER]	GO:0006605	protein targeting	BIOLOGICAL_PROCESS	0.0127433	0.0015598	19	0	3270	1329
[OVER]	GO:0098793	presynapse	CELLULAR_COMPONENT	0.0127433	0.0015598	19	0	3270	1329
[OVER]	GO:0098754	detoxification	BIOLOGICAL_PROCESS	0.0127433	0.0015598	19	0	3270	1329
[OVER]	GO:0050878	regulation of body fluid levels	BIOLOGICAL_PROCESS	0.0127433	0.0015598	19	0	3270	1329
[OVER]	GO:0042393	histone binding	MOLECULAR_FUNCTION	0.0127433	0.0015598	19	0	3270	1329
[OVER]	GO:0050808	synapse organization	BIOLOGICAL_PROCESS	0.0127433	0.0015598	19	0	3270	1329
[OVER]	GO:0050804	modulation of chemical synaptic transmission	BIOLOGICAL_PROCESS	0.0127433	0.0015598	19	0	3270	1329
[OVER]	GO:0097191	extrinsic apoptotic signaling pathway	BIOLOGICAL_PROCESS	0.0127433	0.0015598	19	0	3270	1329
[OVER]	GO:0045995	regulation of embryonic development	BIOLOGICAL_PROCESS	0.0127433	0.0015598	19	0	3270	1329
[OVER]	GO:0030133	transport vesicle	CELLULAR_COMPONENT	0.0127433	0.0015598	19	0	3270	1329
[OVER]	GO:0072659	protein localization to plasma membrane	BIOLOGICAL_PROCESS	0.0127433	0.0015598	19	0	3270	1329
[OVER]	GO:0008094	DNA-dependent ATPase activity	MOLECULAR_FUNCTION	0.0127433	0.0015598	19	0	3270	1329
[OVER]	GO:2001234	negative regulation of apoptotic signaling pathway	BIOLOGICAL_PROCESS	0.0127433	0.0015598	19	0	3270	1329
[OVER]	GO:0061640	cytoskeleton-dependent cytokinesis	BIOLOGICAL_PROCESS	0.0127433	0.0015598	19	0	3270	1329
[OVER]	GO:0002237	response to molecule of bacterial origin	BIOLOGICAL_PROCESS	0.0127433	0.0015598	19	0	3270	1329
[OVER]	GO:0099177	regulation of trans-synaptic signaling	BIOLOGICAL_PROCESS	0.0127433	0.0015598	19	0	3270	1329
[OVER]	GO:0016810	hydrolase activity, acting on carbon-nitrogen (but not peptide) bonds	MOLECULAR_FUNCTION	0.0127433	0.0015598	19	0	3270	1329
[OVER]	GO:0019207	kinase regulator activity	MOLECULAR_FUNCTION	0.0127433	0.0015598	19	0	3270	1329
[OVER]	GO:0052689	carboxylic ester hydrolase activity	MOLECULAR_FUNCTION	0.0127433	0.0015598	19	0	3270	1329
[OVER]	GO:0007160	cell-matrix adhesion	BIOLOGICAL_PROCESS	0.0127433	0.0015598	19	0	3270	1329
[OVER]	GO:0046777	protein autophosphorylation	BIOLOGICAL_PROCESS	0.0127433	0.0015598	19	0	3270	1329
[OVER]	GO:0045177	apical part of cell	CELLULAR_COMPONENT	0.0127433	0.0015598	19	0	3270	1329
[OVER]	GO:0005938	cell cortex	CELLULAR_COMPONENT	0.0127433	0.0015598	19	0	3270	1329
[OVER]	GO:0051098	regulation of binding	BIOLOGICAL_PROCESS	0.0127433	0.0015598	19	0	3270	1329
[OVER]	GO:0000077	DNA damage checkpoint	BIOLOGICAL_PROCESS	0.0127433	0.0015598	19	0	3270	1329
[OVER]	GO:0043122	regulation of I-kappaB kinase/NF-kappaB signaling	BIOLOGICAL_PROCESS	0.0127433	0.0015598	19	0	3270	1329
[OVER]	GO:0032496	response to lipopolysaccharide	BIOLOGICAL_PROCESS	0.0127433	0.0015598	19	0	3270	1329
[OVER]	GO:0010921	regulation of phosphatase activity	BIOLOGICAL_PROCESS	0.0127433	0.0015598	19	0	3270	1329
[OVER]	GO:0010959	regulation of metal ion transport	BIOLOGICAL_PROCESS	0.0127433	0.0015598	19	0	3270	1329
[OVER]	GO:0009895	negative regulation of catabolic process	BIOLOGICAL_PROCESS	0.0127433	0.0015598	19	0	3270	1329
[OVER]	GO:0071824	protein-DNA complex subunit organization	BIOLOGICAL_PROCESS	0.0127433	0.0015598	19	0	3270	1329
[OVER]	GO:0019216	regulation of lipid metabolic process	BIOLOGICAL_PROCESS	0.0127433	0.0015598	19	0	3270	1329
[OVER]	GO:0046982	protein heterodimerization activity	MOLECULAR_FUNCTION	0.0127433	0.0015598	19	0	3270	1329
[OVER]	GO:0046942	carboxylic acid transport	BIOLOGICAL_PROCESS	0.0127433	0.0015598	19	0	3270	1329
[OVER]	GO:0090305	nucleic acid phosphodiester bond hydrolysis	BIOLOGICAL_PROCESS	0.0129327	0.00158441	44	5	3245	1324
[OVER]	GO:1901605	alpha-amino acid metabolic process	BIOLOGICAL_PROCESS	0.0134914	0.0016573	25	1	3264	1328
[OVER]	GO:0016616	oxidoreductase activity, acting on the CH-OH group of donors, NAD or NADP as acceptor	MOLECULAR_FUNCTION	0.0134914	0.0016573	25	1	3264	1328
[OVER]	GO:0000075	cell cycle checkpoint	BIOLOGICAL_PROCESS	0.0134914	0.0016573	25	1	3264	1328
[OVER]	GO:0003774	motor activity	MOLECULAR_FUNCTION	0.014433	0.00177456	30	2	3259	1327
[OVER]	GO:0097447	dendritic tree	CELLULAR_COMPONENT	0.0171357	0.00219355	18	0	3271	1329
[OVER]	GO:0030425	dendrite	CELLULAR_COMPONENT	0.0171357	0.00219355	18	0	3271	1329
[OVER]	GO:1902495	transmembrane transporter complex	CELLULAR_COMPONENT	0.0171357	0.00219355	18	0	3271	1329
[OVER]	GO:0000280	nuclear division	BIOLOGICAL_PROCESS	0.0171357	0.00217545	34	3	3255	1326
[OVER]	GO:0006413	translational initiation	BIOLOGICAL_PROCESS	0.0171357	0.00219355	18	0	3271	1329
[OVER]	GO:0048285	organelle fission	BIOLOGICAL_PROCESS	0.0171357	0.00217545	34	3	3255	1326
[OVER]	GO:0017048	Rho GTPase binding	MOLECULAR_FUNCTION	0.0171357	0.00219355	18	0	3271	1329
[OVER]	GO:0006399	tRNA metabolic process	BIOLOGICAL_PROCESS	0.0171357	0.00219355	18	0	3271	1329
[OVER]	GO:0051961	negative regulation of nervous system development	BIOLOGICAL_PROCESS	0.0171357	0.00219355	18	0	3271	1329
[OVER]	GO:0019887	protein kinase regulator activity	MOLECULAR_FUNCTION	0.0171357	0.00219355	18	0	3271	1329
[OVER]	GO:0043434	response to peptide hormone	BIOLOGICAL_PROCESS	0.0171357	0.00219355	18	0	3271	1329
[OVER]	GO:0030198	extracellular matrix organization	BIOLOGICAL_PROCESS	0.0171357	0.00219355	18	0	3271	1329
[OVER]	GO:0016407	acetyltransferase activity	MOLECULAR_FUNCTION	0.0171357	0.00219355	18	0	3271	1329
[OVER]	GO:0030705	cytoskeleton-dependent intracellular transport	BIOLOGICAL_PROCESS	0.0171357	0.00219355	18	0	3271	1329
[OVER]	GO:0072522	purine-containing compound biosynthetic process	BIOLOGICAL_PROCESS	0.0171357	0.00219355	18	0	3271	1329
[OVER]	GO:0048863	stem cell differentiation	BIOLOGICAL_PROCESS	0.0171357	0.00219355	18	0	3271	1329
[OVER]	GO:0042826	histone deacetylase binding	MOLECULAR_FUNCTION	0.0171357	0.00219355	18	0	3271	1329
[OVER]	GO:2001236	regulation of extrinsic apoptotic signaling pathway	BIOLOGICAL_PROCESS	0.0171357	0.00219355	18	0	3271	1329
[OVER]	GO:0046034	ATP metabolic process	BIOLOGICAL_PROCESS	0.0171357	0.00219355	18	0	3271	1329
[OVER]	GO:0004252	serine-type endopeptidase activity	MOLECULAR_FUNCTION	0.0171357	0.00219355	18	0	3271	1329
[OVER]	GO:0016298	lipase activity	MOLECULAR_FUNCTION	0.0171357	0.00219355	18	0	3271	1329
[OVER]	GO:0016324	apical plasma membrane	CELLULAR_COMPONENT	0.0171357	0.00219355	18	0	3271	1329
[OVER]	GO:0048732	gland development	BIOLOGICAL_PROCESS	0.0171357	0.00219355	18	0	3271	1329
[OVER]	GO:0002263	cell activation involved in immune response	BIOLOGICAL_PROCESS	0.0171357	0.00219355	18	0	3271	1329
[OVER]	GO:0022618	ribonucleoprotein complex assembly	BIOLOGICAL_PROCESS	0.0171357	0.00219355	18	0	3271	1329
[OVER]	GO:0099111	microtubule-based transport	BIOLOGICAL_PROCESS	0.0171357	0.00219355	18	0	3271	1329
[OVER]	GO:0046677	response to antibiotic	BIOLOGICAL_PROCESS	0.0171357	0.00219355	18	0	3271	1329
[OVER]	GO:0070302	regulation of stress-activated protein kinase signaling cascade	BIOLOGICAL_PROCESS	0.0171357	0.00219355	18	0	3271	1329
[OVER]	GO:0002366	leukocyte activation involved in immune response	BIOLOGICAL_PROCESS	0.0171357	0.00219355	18	0	3271	1329
[OVER]	GO:0007159	leukocyte cell-cell adhesion	BIOLOGICAL_PROCESS	0.0171357	0.00219355	18	0	3271	1329
[OVER]	GO:0002040	sprouting angiogenesis	BIOLOGICAL_PROCESS	0.0171357	0.00219355	18	0	3271	1329
[OVER]	GO:0046488	phosphatidylinositol metabolic process	BIOLOGICAL_PROCESS	0.0171357	0.00219355	18	0	3271	1329
[OVER]	GO:0090596	sensory organ morphogenesis	BIOLOGICAL_PROCESS	0.0171357	0.00219355	18	0	3271	1329
[OVER]	GO:0033157	regulation of intracellular protein transport	BIOLOGICAL_PROCESS	0.0171357	0.00219355	18	0	3271	1329
[OVER]	GO:0046578	regulation of Ras protein signal transduction	BIOLOGICAL_PROCESS	0.0171357	0.00219355	18	0	3271	1329
[OVER]	GO:0032508	DNA duplex unwinding	BIOLOGICAL_PROCESS	0.0171357	0.00219355	18	0	3271	1329
[OVER]	GO:0006164	purine nucleotide biosynthetic process	BIOLOGICAL_PROCESS	0.0171357	0.00219355	18	0	3271	1329
[OVER]	GO:0015914	phospholipid transport	BIOLOGICAL_PROCESS	0.0171357	0.00219355	18	0	3271	1329
[OVER]	GO:0051495	positive regulation of cytoskeleton organization	BIOLOGICAL_PROCESS	0.0171357	0.00219355	18	0	3271	1329
[OVER]	GO:0010970	transport along microtubule	BIOLOGICAL_PROCESS	0.0171357	0.00219355	18	0	3271	1329
[OVER]	GO:0003707	steroid hormone receptor activity	MOLECULAR_FUNCTION	0.0171357	0.00219355	18	0	3271	1329
[OVER]	GO:0003743	translation initiation factor activity	MOLECULAR_FUNCTION	0.0171357	0.00219355	18	0	3271	1329
[OVER]	GO:0003746	translation elongation factor activity	MOLECULAR_FUNCTION	0.0171357	0.00219355	18	0	3271	1329
[OVER]	GO:0045666	positive regulation of neuron differentiation	BIOLOGICAL_PROCESS	0.0171357	0.00219355	18	0	3271	1329
[OVER]	GO:1990351	transporter complex	CELLULAR_COMPONENT	0.0171357	0.00219355	18	0	3271	1329
[OVER]	GO:0043062	extracellular structure organization	BIOLOGICAL_PROCESS	0.0171357	0.00219355	18	0	3271	1329
[OVER]	GO:0098661	inorganic anion transmembrane transport	BIOLOGICAL_PROCESS	0.0174828	0.00224952	24	1	3265	1328
[OVER]	GO:0048871	multicellular organismal homeostasis	BIOLOGICAL_PROCESS	0.0174828	0.00224952	24	1	3265	1328
[OVER]	GO:0003013	circulatory system process	BIOLOGICAL_PROCESS	0.0174828	0.00224952	24	1	3265	1328
[OVER]	GO:0051249	regulation of lymphocyte activation	BIOLOGICAL_PROCESS	0.0174828	0.00224952	24	1	3265	1328
[OVER]	GO:1901990	regulation of mitotic cell cycle phase transition	BIOLOGICAL_PROCESS	0.0174828	0.00224952	24	1	3265	1328
[OVER]	GO:0051015	actin filament binding	MOLECULAR_FUNCTION	0.0174828	0.00224952	24	1	3265	1328
[OVER]	GO:0019842	vitamin binding	MOLECULAR_FUNCTION	0.0182725	0.00235314	29	2	3260	1327
[OVER]	GO:0004518	nuclease activity	MOLECULAR_FUNCTION	0.0198891	0.00256351	42	5	3247	1324
[OVER]	GO:0050778	positive regulation of immune response	BIOLOGICAL_PROCESS	0.0227473	0.00304905	23	1	3266	1328
[OVER]	GO:0006694	steroid biosynthetic process	BIOLOGICAL_PROCESS	0.0227473	0.00308451	17	0	3272	1329
[OVER]	GO:0016052	carbohydrate catabolic process	BIOLOGICAL_PROCESS	0.0227473	0.00308451	17	0	3272	1329
[OVER]	GO:0030279	negative regulation of ossification	BIOLOGICAL_PROCESS	0.0227473	0.00308451	17	0	3272	1329
[OVER]	GO:0004197	cysteine-type endopeptidase activity	MOLECULAR_FUNCTION	0.0227473	0.00308451	17	0	3272	1329
[OVER]	GO:0065004	protein-DNA complex assembly	BIOLOGICAL_PROCESS	0.0227473	0.00308451	17	0	3272	1329
[OVER]	GO:0090068	positive regulation of cell cycle process	BIOLOGICAL_PROCESS	0.0227473	0.00304905	23	1	3266	1328
[OVER]	GO:1903708	positive regulation of hemopoiesis	BIOLOGICAL_PROCESS	0.0227473	0.00308451	17	0	3272	1329
[OVER]	GO:0000281	mitotic cytokinesis	BIOLOGICAL_PROCESS	0.0227473	0.00308451	17	0	3272	1329
[OVER]	GO:0006402	mRNA catabolic process	BIOLOGICAL_PROCESS	0.0227473	0.00304905	23	1	3266	1328
[OVER]	GO:0006473	protein acetylation	BIOLOGICAL_PROCESS	0.0227473	0.00308451	17	0	3272	1329
[OVER]	GO:0030055	cell-substrate junction	CELLULAR_COMPONENT	0.0227473	0.00308451	17	0	3272	1329
[OVER]	GO:0032886	regulation of microtubule-based process	BIOLOGICAL_PROCESS	0.0227473	0.00308451	17	0	3272	1329
[OVER]	GO:0030217	T cell differentiation	BIOLOGICAL_PROCESS	0.0227473	0.00308451	17	0	3272	1329
[OVER]	GO:0032872	regulation of stress-activated MAPK cascade	BIOLOGICAL_PROCESS	0.0227473	0.00308451	17	0	3272	1329
[OVER]	GO:0032868	response to insulin	BIOLOGICAL_PROCESS	0.0227473	0.00308451	17	0	3272	1329
[OVER]	GO:0005178	integrin binding	MOLECULAR_FUNCTION	0.0227473	0.00308451	17	0	3272	1329
[OVER]	GO:1990748	cellular detoxification	BIOLOGICAL_PROCESS	0.0227473	0.00308451	17	0	3272	1329
[OVER]	GO:0005759	mitochondrial matrix	CELLULAR_COMPONENT	0.0227473	0.00308451	17	0	3272	1329
[OVER]	GO:0060562	epithelial tube morphogenesis	BIOLOGICAL_PROCESS	0.0227473	0.00308451	17	0	3272	1329
[OVER]	GO:0071214	cellular response to abiotic stimulus	BIOLOGICAL_PROCESS	0.0227473	0.00308451	17	0	3272	1329
[OVER]	GO:0005770	late endosome	CELLULAR_COMPONENT	0.0227473	0.00308451	17	0	3272	1329
[OVER]	GO:0005769	early endosome	CELLULAR_COMPONENT	0.0227473	0.00308451	17	0	3272	1329
[OVER]	GO:0072507	divalent inorganic cation homeostasis	BIOLOGICAL_PROCESS	0.0227473	0.00304905	23	1	3266	1328
[OVER]	GO:1902905	positive regulation of supramolecular fiber organization	BIOLOGICAL_PROCESS	0.0227473	0.00308451	17	0	3272	1329
[OVER]	GO:0071375	cellular response to peptide hormone stimulus	BIOLOGICAL_PROCESS	0.0227473	0.00308451	17	0	3272	1329
[OVER]	GO:0008083	growth factor activity	MOLECULAR_FUNCTION	0.0227473	0.00308451	17	0	3272	1329
[OVER]	GO:0006839	mitochondrial transport	BIOLOGICAL_PROCESS	0.0227473	0.00308451	17	0	3272	1329
[OVER]	GO:0060326	cell chemotaxis	BIOLOGICAL_PROCESS	0.0227473	0.00304905	23	1	3266	1328
[OVER]	GO:0005539	glycosaminoglycan binding	MOLECULAR_FUNCTION	0.0227473	0.00308451	17	0	3272	1329
[OVER]	GO:0030496	midbody	CELLULAR_COMPONENT	0.0227473	0.00308451	17	0	3272	1329
[OVER]	GO:0016197	endosomal transport	BIOLOGICAL_PROCESS	0.0227473	0.00308451	17	0	3272	1329
[OVER]	GO:0010001	glial cell differentiation	BIOLOGICAL_PROCESS	0.0227473	0.00308451	17	0	3272	1329
[OVER]	GO:0010035	response to inorganic substance	BIOLOGICAL_PROCESS	0.0227473	0.00308451	17	0	3272	1329
[OVER]	GO:0043903	regulation of symbiosis, encompassing mutualism through parasitism	BIOLOGICAL_PROCESS	0.0227473	0.00308451	17	0	3272	1329
[OVER]	GO:0048771	tissue remodeling	BIOLOGICAL_PROCESS	0.0227473	0.00308451	17	0	3272	1329
[OVER]	GO:0002250	adaptive immune response	BIOLOGICAL_PROCESS	0.0227473	0.00308451	17	0	3272	1329
[OVER]	GO:0002262	myeloid cell homeostasis	BIOLOGICAL_PROCESS	0.0227473	0.00308451	17	0	3272	1329
[OVER]	GO:0008406	gonad development	BIOLOGICAL_PROCESS	0.0227473	0.00308451	17	0	3272	1329
[OVER]	GO:0010632	regulation of epithelial cell migration	BIOLOGICAL_PROCESS	0.0227473	0.00308451	17	0	3272	1329
[OVER]	GO:0044057	regulation of system process	BIOLOGICAL_PROCESS	0.0227473	0.00304905	23	1	3266	1328
[OVER]	GO:0003697	single-stranded DNA binding	MOLECULAR_FUNCTION	0.0227473	0.00308451	17	0	3272	1329
[OVER]	GO:0062023	collagen-containing extracellular matrix	CELLULAR_COMPONENT	0.0227473	0.00308451	17	0	3272	1329
[OVER]	GO:0007219	Notch signaling pathway	BIOLOGICAL_PROCESS	0.0227473	0.00308451	17	0	3272	1329
[OVER]	GO:0007179	transforming growth factor beta receptor signaling pathway	BIOLOGICAL_PROCESS	0.0227473	0.00308451	17	0	3272	1329
[OVER]	GO:0005976	polysaccharide metabolic process	BIOLOGICAL_PROCESS	0.0227473	0.00308451	17	0	3272	1329
[OVER]	GO:0022407	regulation of cell-cell adhesion	BIOLOGICAL_PROCESS	0.0227473	0.00308451	17	0	3272	1329
[OVER]	GO:0009416	response to light stimulus	BIOLOGICAL_PROCESS	0.0227473	0.00308451	17	0	3272	1329
[OVER]	GO:0008154	actin polymerization or depolymerization	BIOLOGICAL_PROCESS	0.0227473	0.00308451	17	0	3272	1329
[OVER]	GO:0045137	development of primary sexual characteristics	BIOLOGICAL_PROCESS	0.0227473	0.00308451	17	0	3272	1329
[OVER]	GO:0005925	focal adhesion	CELLULAR_COMPONENT	0.0227473	0.00308451	17	0	3272	1329
[OVER]	GO:0051047	positive regulation of secretion	BIOLOGICAL_PROCESS	0.0227473	0.00308451	17	0	3272	1329
[OVER]	GO:0104004	cellular response to environmental stimulus	BIOLOGICAL_PROCESS	0.0227473	0.00308451	17	0	3272	1329
[OVER]	GO:0015980	energy derivation by oxidation of organic compounds	BIOLOGICAL_PROCESS	0.0227473	0.00304905	23	1	3266	1328
[OVER]	GO:0140101	catalytic activity, acting on a tRNA	MOLECULAR_FUNCTION	0.0227473	0.00308451	17	0	3272	1329
[OVER]	GO:0002460	adaptive immune response based on somatic recombination of immune receptors built from immunoglobulin superfamily domains	BIOLOGICAL_PROCESS	0.0227473	0.00308451	17	0	3272	1329
[OVER]	GO:0010948	negative regulation of cell cycle process	BIOLOGICAL_PROCESS	0.0227473	0.00304905	23	1	3266	1328
[OVER]	GO:0008643	carbohydrate transport	BIOLOGICAL_PROCESS	0.0227473	0.00308451	17	0	3272	1329
[OVER]	GO:0003735	structural constituent of ribosome	MOLECULAR_FUNCTION	0.0227473	0.00304905	23	1	3266	1328
[OVER]	GO:0018105	peptidyl-serine phosphorylation	BIOLOGICAL_PROCESS	0.0227473	0.00304905	23	1	3266	1328
[OVER]	GO:0043025	neuronal cell body	CELLULAR_COMPONENT	0.0227473	0.00308451	17	0	3272	1329
[OVER]	GO:0006631	fatty acid metabolic process	BIOLOGICAL_PROCESS	0.0302111	0.00412649	22	1	3267	1328
[OVER]	GO:0043414	macromolecule methylation	BIOLOGICAL_PROCESS	0.0302111	0.00412649	22	1	3267	1328
[OVER]	GO:0031406	carboxylic acid binding	MOLECULAR_FUNCTION	0.0302111	0.00411389	27	2	3262	1327
[OVER]	GO:0005261	cation channel activity	MOLECULAR_FUNCTION	0.0302111	0.00412649	22	1	3267	1328
[OVER]	GO:0072503	cellular divalent inorganic cation homeostasis	BIOLOGICAL_PROCESS	0.0302111	0.00412649	22	1	3267	1328
[OVER]	GO:0008015	blood circulation	BIOLOGICAL_PROCESS	0.0302111	0.00412649	22	1	3267	1328
[OVER]	GO:0003012	muscle system process	BIOLOGICAL_PROCESS	0.0302111	0.00412649	22	1	3267	1328
[OVER]	GO:0032103	positive regulation of response to external stimulus	BIOLOGICAL_PROCESS	0.0302111	0.00412649	22	1	3267	1328
[OVER]	GO:0043177	organic acid binding	MOLECULAR_FUNCTION	0.0302111	0.00411389	27	2	3262	1327
[OVER]	GO:0050792	regulation of viral process	BIOLOGICAL_PROCESS	0.0304761	0.00433697	16	0	3273	1329
[OVER]	GO:0043624	cellular protein complex disassembly	BIOLOGICAL_PROCESS	0.0304761	0.00433697	16	0	3273	1329
[OVER]	GO:0006665	sphingolipid metabolic process	BIOLOGICAL_PROCESS	0.0304761	0.00433697	16	0	3273	1329
[OVER]	GO:0016051	carbohydrate biosynthetic process	BIOLOGICAL_PROCESS	0.0304761	0.00433697	16	0	3273	1329
[OVER]	GO:0043583	ear development	BIOLOGICAL_PROCESS	0.0304761	0.00433697	16	0	3273	1329
[OVER]	GO:0098869	cellular oxidant detoxification	BIOLOGICAL_PROCESS	0.0304761	0.00433697	16	0	3273	1329
[OVER]	GO:0090092	regulation of transmembrane receptor protein serine/threonine kinase signaling pathway	BIOLOGICAL_PROCESS	0.0304761	0.00433697	16	0	3273	1329
[OVER]	GO:0016072	rRNA metabolic process	BIOLOGICAL_PROCESS	0.0304761	0.00433697	16	0	3273	1329
[OVER]	GO:0050867	positive regulation of cell activation	BIOLOGICAL_PROCESS	0.0304761	0.00433697	16	0	3273	1329
[OVER]	GO:0050817	coagulation	BIOLOGICAL_PROCESS	0.0304761	0.00433697	16	0	3273	1329
[OVER]	GO:0017137	Rab GTPase binding	MOLECULAR_FUNCTION	0.0304761	0.00433697	16	0	3273	1329
[OVER]	GO:0030027	lamellipodium	CELLULAR_COMPONENT	0.0304761	0.00433697	16	0	3273	1329
[OVER]	GO:0097193	intrinsic apoptotic signaling pathway	BIOLOGICAL_PROCESS	0.0304761	0.00433697	16	0	3273	1329
[OVER]	GO:1903532	positive regulation of secretion by cell	BIOLOGICAL_PROCESS	0.0304761	0.00433697	16	0	3273	1329
[OVER]	GO:0005200	structural constituent of cytoskeleton	MOLECULAR_FUNCTION	0.0304761	0.00433697	16	0	3273	1329
[OVER]	GO:0032869	cellular response to insulin stimulus	BIOLOGICAL_PROCESS	0.0304761	0.00433697	16	0	3273	1329
[OVER]	GO:0031461	cullin-RING ubiquitin ligase complex	CELLULAR_COMPONENT	0.0304761	0.00433697	16	0	3273	1329
[OVER]	GO:0051924	regulation of calcium ion transport	BIOLOGICAL_PROCESS	0.0304761	0.00433697	16	0	3273	1329
[OVER]	GO:0060560	developmental growth involved in morphogenesis	BIOLOGICAL_PROCESS	0.0304761	0.00433697	16	0	3273	1329
[OVER]	GO:0005774	vacuolar membrane	CELLULAR_COMPONENT	0.0304761	0.00433697	16	0	3273	1329
[OVER]	GO:0009260	ribonucleotide biosynthetic process	BIOLOGICAL_PROCESS	0.0304761	0.00433697	16	0	3273	1329
[OVER]	GO:0046390	ribose phosphate biosynthetic process	BIOLOGICAL_PROCESS	0.0304761	0.00433697	16	0	3273	1329
[OVER]	GO:0015276	ligand-gated ion channel activity	MOLECULAR_FUNCTION	0.0304761	0.00433697	16	0	3273	1329
[OVER]	GO:0033002	muscle cell proliferation	BIOLOGICAL_PROCESS	0.0304761	0.00433697	16	0	3273	1329
[OVER]	GO:0001935	endothelial cell proliferation	BIOLOGICAL_PROCESS	0.0304761	0.00433697	16	0	3273	1329
[OVER]	GO:0061629	RNA polymerase II-specific DNA-binding transcription factor binding	MOLECULAR_FUNCTION	0.0304761	0.00433697	16	0	3273	1329
[OVER]	GO:0040029	regulation of gene expression, epigenetic	BIOLOGICAL_PROCESS	0.0304761	0.00433697	16	0	3273	1329
[OVER]	GO:0042593	glucose homeostasis	BIOLOGICAL_PROCESS	0.0304761	0.00433697	16	0	3273	1329
[OVER]	GO:0009152	purine ribonucleotide biosynthetic process	BIOLOGICAL_PROCESS	0.0304761	0.00433697	16	0	3273	1329
[OVER]	GO:0071695	anatomical structure maturation	BIOLOGICAL_PROCESS	0.0304761	0.00433697	16	0	3273	1329
[OVER]	GO:0051259	protein complex oligomerization	BIOLOGICAL_PROCESS	0.0304761	0.00433697	16	0	3273	1329
[OVER]	GO:0003678	DNA helicase activity	MOLECULAR_FUNCTION	0.0304761	0.00433697	16	0	3273	1329
[OVER]	GO:0022834	ligand-gated channel activity	MOLECULAR_FUNCTION	0.0304761	0.00433697	16	0	3273	1329
[OVER]	GO:0002062	chondrocyte differentiation	BIOLOGICAL_PROCESS	0.0304761	0.00433697	16	0	3273	1329
[OVER]	GO:0016782	transferase activity, transferring sulfur-containing groups	MOLECULAR_FUNCTION	0.0304761	0.00433697	16	0	3273	1329
[OVER]	GO:0004714	transmembrane receptor protein tyrosine kinase activity	MOLECULAR_FUNCTION	0.0304761	0.00433697	16	0	3273	1329
[OVER]	GO:0061035	regulation of cartilage development	BIOLOGICAL_PROCESS	0.0304761	0.00433697	16	0	3273	1329
[OVER]	GO:0099568	cytoplasmic region	CELLULAR_COMPONENT	0.0304761	0.00433697	16	0	3273	1329
[OVER]	GO:0002696	positive regulation of leukocyte activation	BIOLOGICAL_PROCESS	0.0304761	0.00433697	16	0	3273	1329
[OVER]	GO:0045931	positive regulation of mitotic cell cycle	BIOLOGICAL_PROCESS	0.0304761	0.00433697	16	0	3273	1329
[OVER]	GO:0007596	blood coagulation	BIOLOGICAL_PROCESS	0.0304761	0.00433697	16	0	3273	1329
[OVER]	GO:0007599	hemostasis	BIOLOGICAL_PROCESS	0.0304761	0.00433697	16	0	3273	1329
[OVER]	GO:0043296	apical junction complex	CELLULAR_COMPONENT	0.0304761	0.00433697	16	0	3273	1329
[OVER]	GO:0002791	regulation of peptide secretion	BIOLOGICAL_PROCESS	0.0304761	0.00433697	16	0	3273	1329
[OVER]	GO:0009914	hormone transport	BIOLOGICAL_PROCESS	0.0304761	0.00433697	16	0	3273	1329
[OVER]	GO:0009952	anterior/posterior pattern specification	BIOLOGICAL_PROCESS	0.0304761	0.00433697	16	0	3273	1329
[OVER]	GO:0032200	telomere organization	BIOLOGICAL_PROCESS	0.0304761	0.00433697	16	0	3273	1329
[OVER]	GO:0033500	carbohydrate homeostasis	BIOLOGICAL_PROCESS	0.0304761	0.00433697	16	0	3273	1329
[OVER]	GO:0044264	cellular polysaccharide metabolic process	BIOLOGICAL_PROCESS	0.0304761	0.00433697	16	0	3273	1329
[OVER]	GO:0044272	sulfur compound biosynthetic process	BIOLOGICAL_PROCESS	0.0304761	0.00433697	16	0	3273	1329
[OVER]	GO:0021700	developmental maturation	BIOLOGICAL_PROCESS	0.0304761	0.00433697	16	0	3273	1329
[OVER]	GO:0045637	regulation of myeloid cell differentiation	BIOLOGICAL_PROCESS	0.0304761	0.00433697	16	0	3273	1329
[OVER]	GO:0016053	organic acid biosynthetic process	BIOLOGICAL_PROCESS	0.0389391	0.00557557	21	1	3268	1328
[OVER]	GO:0046394	carboxylic acid biosynthetic process	BIOLOGICAL_PROCESS	0.0389391	0.00557557	21	1	3268	1328
[OVER]	GO:0000793	condensed chromosome	CELLULAR_COMPONENT	0.0389391	0.00557557	21	1	3268	1328
[OVER]	GO:0051213	dioxygenase activity	MOLECULAR_FUNCTION	0.0389391	0.00557557	21	1	3268	1328
[OVER]	GO:0000070	mitotic sister chromatid segregation	BIOLOGICAL_PROCESS	0.0389391	0.00557557	21	1	3268	1328
[OVER]	GO:0045930	negative regulation of mitotic cell cycle	BIOLOGICAL_PROCESS	0.0389391	0.00557557	21	1	3268	1328
[OVER]	GO:0003777	microtubule motor activity	MOLECULAR_FUNCTION	0.0389391	0.00557557	21	1	3268	1328
[OVER]	GO:0055074	calcium ion homeostasis	BIOLOGICAL_PROCESS	0.0389391	0.00557557	21	1	3268	1328
[OVER]	GO:0050768	negative regulation of neurogenesis	BIOLOGICAL_PROCESS	0.0403231	0.00609746	15	0	3274	1329
[OVER]	GO:0097485	neuron projection guidance	BIOLOGICAL_PROCESS	0.0403231	0.00609746	15	0	3274	1329
[OVER]	GO:0016054	organic acid catabolic process	BIOLOGICAL_PROCESS	0.0403231	0.00609746	15	0	3274	1329
[OVER]	GO:0060173	limb development	BIOLOGICAL_PROCESS	0.0403231	0.00609746	15	0	3274	1329
[OVER]	GO:0050727	regulation of inflammatory response	BIOLOGICAL_PROCESS	0.0403231	0.00609746	15	0	3274	1329
[OVER]	GO:0050730	regulation of peptidyl-tyrosine phosphorylation	BIOLOGICAL_PROCESS	0.0403231	0.00609746	15	0	3274	1329
[OVER]	GO:0050708	regulation of protein secretion	BIOLOGICAL_PROCESS	0.0403231	0.00609746	15	0	3274	1329
[OVER]	GO:0048588	developmental cell growth	BIOLOGICAL_PROCESS	0.0403231	0.00609746	15	0	3274	1329
[OVER]	GO:0001837	epithelial to mesenchymal transition	BIOLOGICAL_PROCESS	0.0403231	0.00609746	15	0	3274	1329
[OVER]	GO:0001819	positive regulation of cytokine production	BIOLOGICAL_PROCESS	0.0403231	0.00609746	15	0	3274	1329
[OVER]	GO:0050866	negative regulation of cell activation	BIOLOGICAL_PROCESS	0.0403231	0.00609746	15	0	3274	1329
[OVER]	GO:0006403	RNA localization	BIOLOGICAL_PROCESS	0.0403231	0.00609746	15	0	3274	1329
[OVER]	GO:0031349	positive regulation of defense response	BIOLOGICAL_PROCESS	0.0403231	0.00609746	15	0	3274	1329
[OVER]	GO:0031330	negative regulation of cellular catabolic process	BIOLOGICAL_PROCESS	0.0403231	0.00609746	15	0	3274	1329
[OVER]	GO:0050679	positive regulation of epithelial cell proliferation	BIOLOGICAL_PROCESS	0.0403231	0.00609746	15	0	3274	1329
[OVER]	GO:0050658	RNA transport	BIOLOGICAL_PROCESS	0.0403231	0.00609746	15	0	3274	1329
[OVER]	GO:0050657	nucleic acid transport	BIOLOGICAL_PROCESS	0.0403231	0.00609746	15	0	3274	1329
[OVER]	GO:0044839	cell cycle G2/M phase transition	BIOLOGICAL_PROCESS	0.0403231	0.00609746	15	0	3274	1329
[OVER]	GO:0031514	motile cilium	CELLULAR_COMPONENT	0.0403231	0.00609746	15	0	3274	1329
[OVER]	GO:0072089	stem cell proliferation	BIOLOGICAL_PROCESS	0.0403231	0.00609746	15	0	3274	1329
[OVER]	GO:0030135	coated vesicle	CELLULAR_COMPONENT	0.0403231	0.00609746	15	0	3274	1329
[OVER]	GO:0030170	pyridoxal phosphate binding	MOLECULAR_FUNCTION	0.0403231	0.00609746	15	0	3274	1329
[OVER]	GO:0001650	fibrillar center	CELLULAR_COMPONENT	0.0403231	0.00609746	15	0	3274	1329
[OVER]	GO:0071216	cellular response to biotic stimulus	BIOLOGICAL_PROCESS	0.0403231	0.00609746	15	0	3274	1329
[OVER]	GO:0042752	regulation of circadian rhythm	BIOLOGICAL_PROCESS	0.0403231	0.00609746	15	0	3274	1329
[OVER]	GO:1902904	negative regulation of supramolecular fiber organization	BIOLOGICAL_PROCESS	0.0403231	0.00609746	15	0	3274	1329
[OVER]	GO:0005882	intermediate filament	CELLULAR_COMPONENT	0.0403231	0.00609746	15	0	3274	1329
[OVER]	GO:0034399	nuclear periphery	CELLULAR_COMPONENT	0.0403231	0.00609746	15	0	3274	1329
[OVER]	GO:0046395	carboxylic acid catabolic process	BIOLOGICAL_PROCESS	0.0403231	0.00609746	15	0	3274	1329
[OVER]	GO:0030832	regulation of actin filament length	BIOLOGICAL_PROCESS	0.0403231	0.00609746	15	0	3274	1329
[OVER]	GO:0008064	regulation of actin polymerization or depolymerization	BIOLOGICAL_PROCESS	0.0403231	0.00609746	15	0	3274	1329
[OVER]	GO:1902850	microtubule cytoskeleton organization involved in mitosis	BIOLOGICAL_PROCESS	0.0403231	0.00609746	15	0	3274	1329
[OVER]	GO:0016209	antioxidant activity	MOLECULAR_FUNCTION	0.0403231	0.00609746	15	0	3274	1329
[OVER]	GO:0016236	macroautophagy	BIOLOGICAL_PROCESS	0.0403231	0.00609746	15	0	3274	1329
[OVER]	GO:0001936	regulation of endothelial cell proliferation	BIOLOGICAL_PROCESS	0.0403231	0.00609746	15	0	3274	1329
[OVER]	GO:0090150	establishment of protein localization to membrane	BIOLOGICAL_PROCESS	0.0403231	0.00609746	15	0	3274	1329
[OVER]	GO:0005681	spliceosomal complex	CELLULAR_COMPONENT	0.0403231	0.00609746	15	0	3274	1329
[OVER]	GO:0000723	telomere maintenance	BIOLOGICAL_PROCESS	0.0403231	0.00609746	15	0	3274	1329
[OVER]	GO:0000781	chromosome, telomeric region	CELLULAR_COMPONENT	0.0403231	0.00609746	15	0	3274	1329
[OVER]	GO:0048736	appendage development	BIOLOGICAL_PROCESS	0.0403231	0.00609746	15	0	3274	1329
[OVER]	GO:0016875	ligase activity, forming carbon-oxygen bonds	MOLECULAR_FUNCTION	0.0403231	0.00609746	15	0	3274	1329
[OVER]	GO:1903037	regulation of leukocyte cell-cell adhesion	BIOLOGICAL_PROCESS	0.0403231	0.00609746	15	0	3274	1329
[OVER]	GO:0034702	ion channel complex	CELLULAR_COMPONENT	0.0403231	0.00609746	15	0	3274	1329
[OVER]	GO:0051236	establishment of RNA localization	BIOLOGICAL_PROCESS	0.0403231	0.00609746	15	0	3274	1329
[OVER]	GO:0004812	aminoacyl-tRNA ligase activity	MOLECULAR_FUNCTION	0.0403231	0.00609746	15	0	3274	1329
[OVER]	GO:0010810	regulation of cell-substrate adhesion	BIOLOGICAL_PROCESS	0.0403231	0.00609746	15	0	3274	1329
[OVER]	GO:0032102	negative regulation of response to external stimulus	BIOLOGICAL_PROCESS	0.0403231	0.00609746	15	0	3274	1329
[OVER]	GO:0007163	establishment or maintenance of cell polarity	BIOLOGICAL_PROCESS	0.0403231	0.00609746	15	0	3274	1329
[OVER]	GO:0016627	oxidoreductase activity, acting on the CH-CH group of donors	MOLECULAR_FUNCTION	0.0403231	0.00609746	15	0	3274	1329
[OVER]	GO:0002064	epithelial cell development	BIOLOGICAL_PROCESS	0.0403231	0.00609746	15	0	3274	1329
[OVER]	GO:0010506	regulation of autophagy	BIOLOGICAL_PROCESS	0.0403231	0.00609746	15	0	3274	1329
[OVER]	GO:0004620	phospholipase activity	MOLECULAR_FUNCTION	0.0403231	0.00609746	15	0	3274	1329
[OVER]	GO:0070279	vitamin B6 binding	MOLECULAR_FUNCTION	0.0403231	0.00609746	15	0	3274	1329
[OVER]	GO:1902105	regulation of leukocyte differentiation	BIOLOGICAL_PROCESS	0.0403231	0.00609746	15	0	3274	1329
[OVER]	GO:0099643	signal release from synapse	BIOLOGICAL_PROCESS	0.0403231	0.00609746	15	0	3274	1329
[OVER]	GO:0036064	ciliary basal body	CELLULAR_COMPONENT	0.0403231	0.00609746	15	0	3274	1329
[OVER]	GO:0043123	positive regulation of I-kappaB kinase/NF-kappaB signaling	BIOLOGICAL_PROCESS	0.0403231	0.00609746	15	0	3274	1329
[OVER]	GO:0002695	negative regulation of leukocyte activation	BIOLOGICAL_PROCESS	0.0403231	0.00609746	15	0	3274	1329
[OVER]	GO:0045926	negative regulation of growth	BIOLOGICAL_PROCESS	0.0403231	0.00609746	15	0	3274	1329
[OVER]	GO:0006364	rRNA processing	BIOLOGICAL_PROCESS	0.0403231	0.00609746	15	0	3274	1329
[OVER]	GO:0097060	synaptic membrane	CELLULAR_COMPONENT	0.0403231	0.00609746	15	0	3274	1329
[OVER]	GO:0043270	positive regulation of ion transport	BIOLOGICAL_PROCESS	0.0403231	0.00609746	15	0	3274	1329
[OVER]	GO:0051494	negative regulation of cytoskeleton organization	BIOLOGICAL_PROCESS	0.0403231	0.00609746	15	0	3274	1329
[OVER]	GO:0007266	Rho protein signal transduction	BIOLOGICAL_PROCESS	0.0403231	0.00609746	15	0	3274	1329
[OVER]	GO:0007269	neurotransmitter secretion	BIOLOGICAL_PROCESS	0.0403231	0.00609746	15	0	3274	1329
[OVER]	GO:0070507	regulation of microtubule cytoskeleton organization	BIOLOGICAL_PROCESS	0.0403231	0.00609746	15	0	3274	1329
[OVER]	GO:0021537	telencephalon development	BIOLOGICAL_PROCESS	0.0403231	0.00609746	15	0	3274	1329
[OVER]	GO:0046879	hormone secretion	BIOLOGICAL_PROCESS	0.0403231	0.00609746	15	0	3274	1329
[OVER]	GO:0007411	axon guidance	BIOLOGICAL_PROCESS	0.0403231	0.00609746	15	0	3274	1329
[OVER]	GO:0034976	response to endoplasmic reticulum stress	BIOLOGICAL_PROCESS	0.0403231	0.00609746	15	0	3274	1329
[OVER]	GO:0055001	muscle cell development	BIOLOGICAL_PROCESS	0.0403231	0.00609746	15	0	3274	1329
[OVER]	GO:0031023	microtubule organizing center organization	BIOLOGICAL_PROCESS	0.0403231	0.00609746	15	0	3274	1329
[OVER]	GO:0055002	striated muscle cell development	BIOLOGICAL_PROCESS	0.0403231	0.00609746	15	0	3274	1329
[OVER]	GO:0052547	regulation of peptidase activity	BIOLOGICAL_PROCESS	0.043512	0.00658446	53	9	3236	1320
[OVER]	GO:0099503	secretory vesicle	CELLULAR_COMPONENT	0.0470917	0.00713134	25	2	3264	1327
[OVER]	GO:0006874	cellular calcium ion homeostasis	BIOLOGICAL_PROCESS	0.049588	0.00752027	20	1	3269	1328
[OVER]	GO:0008757	S-adenosylmethionine-dependent methyltransferase activity	MOLECULAR_FUNCTION	0.049588	0.00752027	20	1	3269	1328
