# Supplementary material for: Tissue and Temperature-Specific RNA-Seq Analysis Reveals Genomic Versatility and Adaptive Potential in Wild Sea Turtle Hatchlings (Caretta caretta)
Source: Animals (Basel). 2021 Oct 20;11(11):3013. doi: 10.3390/ani11113013 (PMC8614379; doi:10.3390/ani11113013)
Supplement: Supplementary file 1 [file animals-11-03013-s001.zip › Supplemental File4.xlsx]

## Sheet: brain annotation
Category	Term	Count	%	PValue	Genes	List Total	Pop Hits	Pop Total	Fold Enrichment	Bonferroni	Benjamini	FDR
KEGG_PATHWAY	cmy03460:Fanconi anemia pathway	13	0.508011	1.39245e-05	XP_007055059, XP_007071791, XP_007066723, XP_007054991, XP_007058198, XP_007066044, XP_007052818, XP_007058672, XP_007054809, XP_007060121, XP_007060701, XP_007069443, XP_007056228	286	49	4960	4.60111	0.00176686	0.00176686	0.0161471
KEGG_PATHWAY	cmy03440:Homologous recombination	9	0.3517	9.15843e-05	XP_007067196, XP_007054991, XP_007052961, XP_007066044, XP_007052818, XP_007069532, XP_007060121, XP_007069443, XP_007056228	286	27	4960	5.78089	0.0115644	0.00579899	0.106159
KEGG_PATHWAY	cmy04512:ECM-receptor interaction	13	0.508011	0.00454405	XP_007055095, XP_007058600, XP_007057482, XP_007066746, XP_007061965, XP_007069209, XP_007059564, XP_007059930, XP_007060852, XP_007060876, XP_007060206, XP_007067714, XP_007069589	286	89	4960	2.5332	0.439211	0.175356	5.14471
UP_KEYWORDS	Signal	24	0.937866	0.00577637	XP_007059964, XP_007058383, XP_007057203, XP_007059263, XP_007060436, XP_007071027, XP_007066746, XP_007070261, XP_007070939, XP_007053754, XP_007059775, XP_007054776, XP_007053785, XP_007060753, XP_007070490, XP_007057453, XP_007060667, XP_007066658, XP_007067545, XP_007054528, XP_007061769, XP_007069240, XP_007061891, XP_007056990	126	200	1852	1.76381	0.359861	0.359861	5.92904
UP_KEYWORDS	Hydrolase	12	0.468933	0.0111654	XP_007072151, XP_007059658, XP_007057453, XP_007060667, XP_007052818, XP_007067545, XP_007072114, XP_007061891, XP_007061612, XP_007055261, XP_007056228, XP_007072046	126	76	1852	2.3208	0.578769	0.350977	11.1717
UP_KEYWORDS	Nuclease	5	0.195389	0.0150704	XP_007059658, XP_007052818, XP_007067545, XP_007056228, XP_007072046	126	15	1852	4.89947	0.689402	0.322775	14.8037
UP_KEYWORDS	Endonuclease	4	0.156311	0.0332013	XP_007052818, XP_007067545, XP_007056228, XP_007072046	126	11	1852	5.34488	0.925719	0.477941	29.9696
KEGG_PATHWAY	cmy00380:Tryptophan metabolism	7	0.273544	0.0420831	XP_007061145, XP_007057559, XP_007057143, XP_007058288, XP_007069222, XP_007071925, XP_007068812	286	45	4960	2.69775	0.995748	0.744636	39.2624
KEGG_PATHWAY	cmy03008:Ribosome biogenesis in eukaryotes	9	0.3517	0.0459576	XP_007056291, XP_007072749, XP_007064425, XP_007054544, XP_007069959, XP_007061612, XP_007068634, XP_007055664, XP_007069065	286	70	4960	2.22977	0.997458	0.697295	42.0511
KEGG_PATHWAY	cmy04110:Cell cycle	13	0.508011	0.0626592	XP_007065051, XP_007058417, XP_007071869, XP_007062674, XP_007059747, XP_007054164, XP_007055059, XP_007058162, XP_007059705, XP_007061573, XP_007058864, XP_007065039, XP_007053975	286	128	4960	1.76136	0.99973	0.745807	52.7835
GOTERM_BP_DIRECT	GO:0006281~DNA repair	3	0.117233	0.099944	XP_007052818, XP_007056228, XP_007072046	51	8	725	5.33088	0.99949	0.99949	66.5803

## Sheet: brain clustering
Annotation Cluster 1	Enrichment Score: 1.2596157389374985
Category	Term	Count	%	PValue	Genes	List Total	Pop Hits	Pop Total	Fold Enrichment	Bonferroni	Benjamini	FDR
UP_KEYWORDS	Hydrolase	12	0.468933	0.0111654	XP_007072151, XP_007059658, XP_007057453, XP_007060667, XP_007052818, XP_007067545, XP_007072114, XP_007061891, XP_007061612, XP_007055261, XP_007056228, XP_007072046	126	76	1852	2.3208	0.578769	0.350977	11.1717
UP_KEYWORDS	Nuclease	5	0.195389	0.0150704	XP_007059658, XP_007052818, XP_007067545, XP_007056228, XP_007072046	126	15	1852	4.89947	0.689402	0.322775	14.8037
UP_KEYWORDS	Endonuclease	4	0.156311	0.0332013	XP_007052818, XP_007067545, XP_007056228, XP_007072046	126	11	1852	5.34488	0.925719	0.477941	29.9696
GOTERM_BP_DIRECT	GO:0006281~DNA repair	3	0.117233	0.099944	XP_007052818, XP_007056228, XP_007072046	51	8	725	5.33088	0.99949	0.99949	66.5803
GOTERM_MF_DIRECT	GO:0003677~DNA binding	5	0.195389	0.90159	XP_007060049, XP_007052818, XP_007053641, XP_007056228, XP_007072046	73	105	1176	0.767123	1	1	100
Annotation Cluster 2	Enrichment Score: 0.6892402514189675
Category	Term	Count	%	PValue	Genes	List Total	Pop Hits	Pop Total	Fold Enrichment	Bonferroni	Benjamini	FDR
INTERPRO	IPR018108:Mitochondrial substrate/solute carrier	3	0.117233	0.11813	XP_007065020, XP_007070741, XP_007072624	119	9	1757	4.92157	1	1	81.2962
INTERPRO	IPR023395:Mitochondrial carrier domain	3	0.117233	0.11813	XP_007065020, XP_007070741, XP_007072624	119	9	1757	4.92157	1	1	81.2962
UP_KEYWORDS	Transport	5	0.195389	0.613134	XP_007065020, XP_007070741, XP_007072624, XP_007066102, XP_007068157	126	62	1852	1.18536	1	0.996393	99.9955
Annotation Cluster 3	Enrichment Score: 0.34775295152312174
Category	Term	Count	%	PValue	Genes	List Total	Pop Hits	Pop Total	Fold Enrichment	Bonferroni	Benjamini	FDR
GOTERM_MF_DIRECT	GO:0005524~ATP binding	8	0.312622	0.230363	XP_007069158, XP_007064043, XP_007061241, XP_007063145, XP_007072613, XP_007055261, XP_007056885, XP_007070201	73	82	1176	1.57167	1	1	93.3449
INTERPRO	IPR027417:P-loop containing nucleoside triphosphate hydrolase	8	0.312622	0.458019	XP_007053414, XP_007052737, XP_007059370, XP_007061241, XP_007063145, XP_007071045, XP_007055261, XP_007070201	119	95	1757	1.24334	1	1	99.9717
UP_KEYWORDS	Kinase	5	0.195389	0.470692	XP_007069158, XP_007070468, XP_007064043, XP_007061241, XP_007072613	126	52	1852	1.41331	1	0.999944	99.8784
UP_KEYWORDS	ATP-binding	5	0.195389	0.530292	XP_007069158, XP_007064043, XP_007061241, XP_007055261, XP_007070201	126	56	1852	1.31236	1	0.997028	99.9655
UP_KEYWORDS	Nucleotide-binding	6	0.234467	0.692927	XP_007069158, XP_007052737, XP_007064043, XP_007061241, XP_007055261, XP_007070201	126	85	1852	1.03754	1	0.996593	99.9996
Annotation Cluster 4	Enrichment Score: 0.2651337747043627
Category	Term	Count	%	PValue	Genes	List Total	Pop Hits	Pop Total	Fold Enrichment	Bonferroni	Benjamini	FDR
GOTERM_MF_DIRECT	GO:0008270~zinc ion binding	6	0.234467	0.467445	XP_007057453, XP_007054354, XP_007067144, XP_007060915, XP_007057336, XP_007060737	73	73	1176	1.32408	1	1	99.8527
UP_KEYWORDS	Zinc	5	0.195389	0.500864	XP_007057453, XP_007054354, XP_007060915, XP_007057336, XP_007060737	126	54	1852	1.36096	1	0.999521	99.9345
UP_KEYWORDS	Metal-binding	8	0.312622	0.573323	XP_007057453, XP_007054315, XP_007054354, XP_007067253, XP_007060915, XP_007057336, XP_007072046, XP_007060737	126	105	1852	1.11988	1	0.997425	99.9875
UP_KEYWORDS	Zinc-finger	3	0.117233	0.64806	XP_007054354, XP_007060915, XP_007057336	126	32	1852	1.37798	1	0.995302	99.9984
Annotation Cluster 5	Enrichment Score: 0.24068649979838047
Category	Term	Count	%	PValue	Genes	List Total	Pop Hits	Pop Total	Fold Enrichment	Bonferroni	Benjamini	FDR
GOTERM_CC_DIRECT	GO:0005840~ribosome	3	0.117233	0.431719	XP_007054607, XP_007072359, XP_007070140	62	26	1093	2.03412	1	1	99.1534
UP_KEYWORDS	Ribosomal protein	3	0.117233	0.630565	XP_007054607, XP_007072359, XP_007070140	126	31	1852	1.42243	1	0.995817	99.9973
UP_KEYWORDS	Ribonucleoprotein	3	0.117233	0.696642	XP_007054607, XP_007072359, XP_007070140	126	35	1852	1.25986	1	0.995496	99.9997
Annotation Cluster 6	Enrichment Score: 0.1949015338096606
Category	Term	Count	%	PValue	Genes	List Total	Pop Hits	Pop Total	Fold Enrichment	Bonferroni	Benjamini	FDR
INTERPRO	IPR001611:Leucine-rich repeat	4	0.156311	0.527768	XP_007061143, XP_007059263, XP_007071027, XP_007059775	119	41	1757	1.44046	1	1	99.9955
INTERPRO	IPR003591:Leucine-rich repeat, typical subtype	3	0.117233	0.694103	XP_007061143, XP_007059263, XP_007071027	119	35	1757	1.26555	1	1	100
SMART	SM00369:LRR_TYP	3	0.117233	0.710279	XP_007061143, XP_007059263, XP_007071027	61	35	872	1.22529	1	1	99.9997
Annotation Cluster 7	Enrichment Score: 0.18423559013489144
Category	Term	Count	%	PValue	Genes	List Total	Pop Hits	Pop Total	Fold Enrichment	Bonferroni	Benjamini	FDR
KEGG_PATHWAY	cmy04270:Vascular smooth muscle contraction	9	0.3517	0.384843	XP_007071946, XP_007056754, XP_007061418, XP_007071330, XP_007054800, XP_007070448, XP_007055144, XP_007054477, XP_007066982	286	120	4960	1.3007	1	0.889617	99.6428
KEGG_PATHWAY	cmy04912:GnRH signaling pathway	6	0.234467	0.586616	XP_007071946, XP_007053591, XP_007056754, XP_007059111, XP_007070448, XP_007066982	286	89	4960	1.16917	1	0.939477	99.9964
KEGG_PATHWAY	cmy04540:Gap junction	6	0.234467	0.596704	XP_007071946, XP_007071330, XP_007070448, XP_007059846, XP_007060533, XP_007066982	286	90	4960	1.15618	1	0.939966	99.9973
KEGG_PATHWAY	cmy04916:Melanogenesis	4	0.156311	0.93037	XP_007071946, XP_007064795, XP_007070448, XP_007066982	286	99	4960	0.700713	1	0.995353	100
KEGG_PATHWAY	cmy04261:Adrenergic signaling in cardiomyocytes	5	0.195389	0.956687	XP_007071946, XP_007072733, XP_007070448, XP_007055513, XP_007066982	286	135	4960	0.642321	1	0.996906	100
Annotation Cluster 8	Enrichment Score: 0.0720795758602596
Category	Term	Count	%	PValue	Genes	List Total	Pop Hits	Pop Total	Fold Enrichment	Bonferroni	Benjamini	FDR
GOTERM_MF_DIRECT	GO:0003676~nucleic acid binding	5	0.195389	0.679122	XP_007070478, XP_007057211, XP_007055561, XP_007067545, XP_007055261	73	74	1176	1.08849	1	1	99.9992
GOTERM_MF_DIRECT	GO:0046872~metal ion binding	5	0.195389	0.832791	XP_007070478, XP_007057211, XP_007055561, XP_007054315, XP_007072046	73	92	1176	0.875521	1	1	100
INTERPRO	IPR013087:Zinc finger C2H2-type/integrase DNA-binding domain	3	0.117233	0.876155	XP_007070478, XP_007057211, XP_007055561	119	52	1757	0.85181	1	1	100
INTERPRO	IPR015880:Zinc finger, C2H2-like	3	0.117233	0.901186	XP_007070478, XP_007057211, XP_007055561	119	56	1757	0.790966	1	1	100
INTERPRO	IPR007087:Zinc finger, C2H2	3	0.117233	0.906668	XP_007070478, XP_007057211, XP_007055561	119	57	1757	0.77709	1	1	100
SMART	SM00355:ZnF_C2H2	3	0.117233	0.912421	XP_007070478, XP_007057211, XP_007055561	61	56	872	0.765808	1	1	100
Annotation Cluster 9	Enrichment Score: 0.05528500504575046
Category	Term	Count	%	PValue	Genes	List Total	Pop Hits	Pop Total	Fold Enrichment	Bonferroni	Benjamini	FDR
SMART	SM01381:SM01381	5	0.195389	0.534046	XP_007065575, XP_007057799, XP_007067510, XP_007071284, XP_007060533	61	55	872	1.29955	1	1	99.9603
UP_KEYWORDS	Transducer	10	0.390778	0.938781	XP_007065575, XP_007059360, XP_007057799, XP_007067510, XP_007052737, XP_007055935, XP_007069115, XP_007071284, XP_007060533, XP_007072366	126	200	1852	0.734921	1	0.999988	100
UP_KEYWORDS	Receptor	12	0.468933	0.961194	XP_007070911, XP_007065575, XP_007059360, XP_007057799, XP_007067510, XP_007054354, XP_007055935, XP_007064043, XP_007071284, XP_007059775, XP_007060533, XP_007072366	126	248	1852	0.711214	1	0.999996	100
UP_KEYWORDS	G-protein coupled receptor	8	0.312622	0.982004	XP_007065575, XP_007059360, XP_007057799, XP_007067510, XP_007055935, XP_007071284, XP_007060533, XP_007072366	126	192	1852	0.612434	1	0.999996	100
INTERPRO	IPR000276:G protein-coupled receptor, rhodopsin-like	8	0.312622	0.991284	XP_007065575, XP_007059360, XP_007057799, XP_007067510, XP_007055935, XP_007071284, XP_007060533, XP_007072366	119	208	1757	0.567873	1	1	100
INTERPRO	IPR017452:GPCR, rhodopsin-like, 7TM	8	0.312622	0.993173	XP_007065575, XP_007059360, XP_007057799, XP_007067510, XP_007055935, XP_007071284, XP_007060533, XP_007072366	119	213	1757	0.554543	1	1	100
Annotation Cluster 10	Enrichment Score: 0.03839049212949926
Category	Term	Count	%	PValue	Genes	List Total	Pop Hits	Pop Total	Fold Enrichment	Bonferroni	Benjamini	FDR
GOTERM_CC_DIRECT	GO:0005634~nucleus	9	0.3517	0.805118	XP_007060049, XP_007054354, XP_007063000, XP_007052818, XP_007054489, XP_007063145, XP_007053641, XP_007056228, XP_007072046	62	178	1093	0.891356	1	0.999993	99.9999
UP_KEYWORDS	DNA-binding	5	0.195389	0.974814	XP_007060049, XP_007054354, XP_007059111, XP_007063000, XP_007072046	126	124	1852	0.592678	1	0.999996	100
UP_KEYWORDS	Nucleus	6	0.234467	0.977344	XP_007060049, XP_007054354, XP_007063000, XP_007063145, XP_007061612, XP_007072046	126	147	1852	0.599935	1	0.999995	100
Annotation Cluster 11	Enrichment Score: 0.03714719665346609
Category	Term	Count	%	PValue	Genes	List Total	Pop Hits	Pop Total	Fold Enrichment	Bonferroni	Benjamini	FDR
GOTERM_CC_DIRECT	GO:0016021~integral component of membrane	29	1.13326	0.783139	XP_007053414, XP_007059360, XP_007067510, XP_007071027, XP_007056808, XP_007065548, XP_007070741, XP_007060915, XP_007059775, XP_007066102, XP_007070911, XP_007070439, XP_007055935, XP_007066804, XP_007061769, XP_007072624, XP_007068157, XP_007061143, XP_007065575, XP_007058067, XP_007065020, XP_007069689, XP_007063938, XP_007061896, XP_007056956, XP_007057799, XP_007063514, XP_007071284, XP_0070…	62	546	1093	0.936341	1	1	99.9998
UP_KEYWORDS	Membrane	32	1.25049	0.965445	XP_007053414, XP_007059360, XP_007067510, XP_007071027, XP_007056808, XP_007065548, XP_007070741, XP_007060915, XP_007059775, XP_007066102, XP_007070911, XP_007070439, XP_007055935, XP_007066804, XP_007069115, XP_007061769, XP_007072624, XP_007068157, XP_007061143, XP_007065575, XP_007058067, XP_007065020, XP_007069689, XP_007072366, XP_007060533, XP_007056956, XP_007063938, XP_007061896, XP_0070…	126	585	1852	0.804016	1	0.999996	100
UP_KEYWORDS	Transmembrane	31	1.21141	0.96922	XP_007053414, XP_007059360, XP_007067510, XP_007071027, XP_007056808, XP_007065548, XP_007070741, XP_007060915, XP_007059775, XP_007066102, XP_007070911, XP_007070439, XP_007055935, XP_007066804, XP_007061769, XP_007072624, XP_007068157, XP_007061143, XP_007065575, XP_007058067, XP_007065020, XP_007069689, XP_007072366, XP_007060533, XP_007063938, XP_007061896, XP_007056956, XP_007057799, XP_0070…	126	573	1852	0.795202	1	0.999995	100
UP_KEYWORDS	Transmembrane helix	31	1.21141	0.96922	XP_007053414, XP_007059360, XP_007067510, XP_007071027, XP_007056808, XP_007065548, XP_007070741, XP_007060915, XP_007059775, XP_007066102, XP_007070911, XP_007070439, XP_007055935, XP_007066804, XP_007061769, XP_007072624, XP_007068157, XP_007061143, XP_007065575, XP_007058067, XP_007065020, XP_007069689, XP_007072366, XP_007060533, XP_007063938, XP_007061896, XP_007056956, XP_007057799, XP_0070…	126	573	1852	0.795202	1	0.999995	100

## Sheet: gonad annotation
Category	Term	Count	%	PValue	Genes	List Total	Pop Hits	Pop Total	Fold Enrichment	Bonferroni	Benjamini	FDR
KEGG_PATHWAY	cmy04512:ECM-receptor interaction	18	0.788782	0.0001699	XP_007062383, XP_007055096, XP_007068839, XP_007055095, XP_007058600, XP_007068349, XP_007069209, XP_007064393, XP_007065721, XP_007057275, XP_007057083, XP_007060207, XP_007057625, XP_007060206, XP_007067714, XP_007055280, XP_007072662, XP_007057006	360	89	4960	2.78652	0.024005	0.024005	0.201025
INTERPRO	IPR015943:WD40/YVTN repeat-like-containing domain	6	0.262927	0.00912094	XP_007064484, XP_007064555, XP_007057761, XP_007061492, XP_007061573, XP_007067446	135	18	1757	4.33827	0.935409	0.935409	11.5188
UP_KEYWORDS	Metal-binding	16	0.701139	0.0103511	XP_007061047, XP_007065514, XP_007058514, XP_007064746, XP_007060915, XP_007055006, XP_007057336, XP_007055541, XP_007057453, XP_007058657, XP_007054354, XP_007071883, XP_007070088, XP_007054804, XP_007067091, XP_007055179	141	105	1852	2.00149	0.607986	0.607986	10.7023
UP_KEYWORDS	Monooxygenase	4	0.175285	0.0178545	XP_007065293, XP_007055541, XP_007070088, XP_007067091	141	8	1852	6.56738	0.802382	0.555458	17.7979
UP_KEYWORDS	Oxidoreductase	8	0.35057	0.0210002	XP_007065293, XP_007053926, XP_007055541, XP_007065092, XP_007071883, XP_007070088, XP_007054804, XP_007067091	141	38	1852	2.76521	0.851941	0.470973	20.6172
KEGG_PATHWAY	cmy00514:Other types of O-glycan biosynthesis	6	0.262927	0.0219468	XP_007064616, XP_007063423, XP_007054673, XP_007069219, XP_007061534, XP_007061597	360	23	4960	3.5942	0.958137	0.795395	23.111
INTERPRO	IPR017986:WD40-repeat-containing domain	5	0.219106	0.0286212	XP_007064484, XP_007064555, XP_007057761, XP_007061573, XP_007067446	135	16	1757	4.06713	0.99983	0.98698	32.1485
KEGG_PATHWAY	cmy00480:Glutathione metabolism	8	0.35057	0.0292639	XP_007053926, XP_007071883, XP_007067701, XP_007062234, XP_007066538, XP_007072817, XP_007055119, XP_007071591	360	42	4960	2.62434	0.985696	0.757251	29.6537
UP_KEYWORDS	Transferase	17	0.744961	0.0480189	XP_007064484, XP_007069158, XP_007058349, XP_007069887, XP_007064616, XP_007062221, XP_007059220, XP_007055006, XP_007071045, XP_007062022, XP_007069714, XP_007066334, XP_007061834, XP_007061890, XP_007062104, XP_007066538, XP_007055179	141	137	1852	1.62986	0.988073	0.669526	41.4532
UP_KEYWORDS	DNA repair	3	0.131464	0.0487593	XP_007058449, XP_007058657, XP_007055917	141	5	1852	7.88085	0.988879	0.593344	41.9467
UP_KEYWORDS	DNA damage	3	0.131464	0.0487593	XP_007058449, XP_007058657, XP_007055917	141	5	1852	7.88085	0.988879	0.593344	41.9467
INTERPRO	IPR016024:Armadillo-type fold	4	0.175285	0.0573387	XP_007066377, XP_007057761, XP_007070088, XP_007055158	135	12	1757	4.33827	1	0.99722	54.5547
KEGG_PATHWAY	cmy00500:Starch and sucrose metabolism	6	0.262927	0.0615585	XP_007055582, XP_007062304, XP_007056107, XP_007062314, XP_007062666, XP_007066059	360	30	4960	2.75556	0.999887	0.896829	52.8782
KEGG_PATHWAY	cmy00750:Vitamin B6 metabolism	3	0.131464	0.0644984	XP_007065607, XP_007062084, XP_007071925	360	6	4960	6.88889	0.999928	0.85145	54.597
UP_KEYWORDS	Ligase	5	0.219106	0.0682972	XP_007065514, XP_007055917, XP_007060915, XP_007059163, XP_007057336	141	21	1852	3.12732	0.998282	0.653932	53.6791
GOTERM_BP_DIRECT	GO:0035556~intracellular signal transduction	4	0.175285	0.0814564	XP_007062759, XP_007064746, XP_007055179, XP_007058186	60	13	725	3.71795	0.998676	0.998676	59.2923
GOTERM_MF_DIRECT	GO:0016874~ligase activity	4	0.175285	0.0832592	XP_007065514, XP_007060915, XP_007059163, XP_007057336	84	15	1176	3.73333	0.999198	0.999198	60.493
INTERPRO	IPR001680:WD40 repeat	4	0.175285	0.0848979	XP_007064555, XP_007057761, XP_007061573, XP_007067446	135	14	1757	3.71852	1	0.998682	69.4241
UP_KEYWORDS	Zinc-finger	6	0.262927	0.0884648	XP_007061047, XP_007065514, XP_007054354, XP_007060915, XP_007055179, XP_007057336	141	32	1852	2.46277	0.99976	0.69605	63.4922
SMART	SM00320:WD40	4	0.175285	0.0887148	XP_007064555, XP_007057761, XP_007061573, XP_007067446	69	14	872	3.61077	0.997826	0.997826	61.3197
UP_KEYWORDS	Kinase	8	0.35057	0.0923413	XP_007069714, XP_007069158, XP_007058349, XP_007062221, XP_007061834, XP_007059220, XP_007055179, XP_007062022	141	52	1852	2.02073	0.999837	0.663776	65.1462
INTERPRO	IPR023753:Pyridine nucleotide-disulphide oxidoreductase, FAD/NAD(P)-binding domain	3	0.131464	0.0941036	XP_007065293, XP_007067511, XP_007065092	135	7	1757	5.57778	1	0.997288	73.2865
KEGG_PATHWAY	cmy04142:Lysosome	14	0.613497	0.0964909	XP_007066674, XP_007072347, XP_007067664, XP_007056107, XP_007071640, XP_007063955, XP_007065345, XP_007063194, XP_007072151, XP_007059608, XP_007060187, XP_007067406, XP_007057073, XP_007058264	360	121	4960	1.59412	1	0.910931	69.9313

## Sheet: gonad clustering
Annotation Cluster 1	Enrichment Score: 1.2914977343176859
Category	Term	Count	%	PValue	Genes	List Total	Pop Hits	Pop Total	Fold Enrichment	Bonferroni	Benjamini	FDR
UP_KEYWORDS	Monooxygenase	4	0.175285	0.0178545	XP_007065293, XP_007055541, XP_007070088, XP_007067091	141	8	1852	6.56738	0.802382	0.555458	17.7979
UP_KEYWORDS	Oxidoreductase	8	0.35057	0.0210002	XP_007065293, XP_007053926, XP_007055541, XP_007065092, XP_007071883, XP_007070088, XP_007054804, XP_007067091	141	38	1852	2.76521	0.851941	0.470973	20.6172
UP_KEYWORDS	Iron	4	0.175285	0.356071	XP_007055541, XP_007058657, XP_007070088, XP_007067091	141	28	1852	1.87639	1	0.915916	99.1675
Annotation Cluster 2	Enrichment Score: 1.2684021569475306
Category	Term	Count	%	PValue	Genes	List Total	Pop Hits	Pop Total	Fold Enrichment	Bonferroni	Benjamini	FDR
INTERPRO	IPR015943:WD40/YVTN repeat-like-containing domain	6	0.262927	0.00912094	XP_007064484, XP_007064555, XP_007057761, XP_007061492, XP_007061573, XP_007067446	135	18	1757	4.33827	0.935409	0.935409	11.5188
INTERPRO	IPR017986:WD40-repeat-containing domain	5	0.219106	0.0286212	XP_007064484, XP_007064555, XP_007057761, XP_007061573, XP_007067446	135	16	1757	4.06713	0.99983	0.98698	32.1485
INTERPRO	IPR001680:WD40 repeat	4	0.175285	0.0848979	XP_007064555, XP_007057761, XP_007061573, XP_007067446	135	14	1757	3.71852	1	0.998682	69.4241
SMART	SM00320:WD40	4	0.175285	0.0887148	XP_007064555, XP_007057761, XP_007061573, XP_007067446	69	14	872	3.61077	0.997826	0.997826	61.3197
INTERPRO	IPR019775:WD40 repeat, conserved site	3	0.131464	0.231403	XP_007064555, XP_007061573, XP_007067446	135	12	1757	3.2537	1	0.999218	97.0258
Annotation Cluster 3	Enrichment Score: 1.0017683984156533
Category	Term	Count	%	PValue	Genes	List Total	Pop Hits	Pop Total	Fold Enrichment	Bonferroni	Benjamini	FDR
UP_KEYWORDS	Metal-binding	16	0.701139	0.0103511	XP_007061047, XP_007065514, XP_007058514, XP_007064746, XP_007060915, XP_007055006, XP_007057336, XP_007055541, XP_007057453, XP_007058657, XP_007054354, XP_007071883, XP_007070088, XP_007054804, XP_007067091, XP_007055179	141	105	1852	2.00149	0.607986	0.607986	10.7023
UP_KEYWORDS	Ligase	5	0.219106	0.0682972	XP_007065514, XP_007055917, XP_007060915, XP_007059163, XP_007057336	141	21	1852	3.12732	0.998282	0.653932	53.6791
GOTERM_MF_DIRECT	GO:0016874~ligase activity	4	0.175285	0.0832592	XP_007065514, XP_007060915, XP_007059163, XP_007057336	84	15	1176	3.73333	0.999198	0.999198	60.493
UP_KEYWORDS	Zinc-finger	6	0.262927	0.0884648	XP_007061047, XP_007065514, XP_007054354, XP_007060915, XP_007055179, XP_007057336	141	32	1852	2.46277	0.99976	0.69605	63.4922
UP_KEYWORDS	Zinc	8	0.35057	0.107956	XP_007061047, XP_007065514, XP_007057453, XP_007054354, XP_007064746, XP_007060915, XP_007055179, XP_007057336	141	54	1852	1.94589	0.999966	0.680947	71.1421
INTERPRO	IPR013083:Zinc finger, RING/FYVE/PHD-type	6	0.262927	0.122568	XP_007061047, XP_007065514, XP_007063773, XP_007060915, XP_007059163, XP_007057336	135	35	1757	2.23111	1	0.992456	82.56
GOTERM_MF_DIRECT	GO:0008270~zinc ion binding	9	0.394391	0.135275	XP_007061047, XP_007065514, XP_007057453, XP_007054354, XP_007058514, XP_007063773, XP_007060915, XP_007059163, XP_007057336	84	73	1176	1.72603	0.999993	0.997418	78.8332
SMART	SM00184:RING	4	0.175285	0.286187	XP_007065514, XP_007063773, XP_007059163, XP_007057336	69	24	872	2.10628	1	0.999399	96.8159
INTERPRO	IPR001841:Zinc finger, RING-type	4	0.175285	0.361407	XP_007065514, XP_007063773, XP_007059163, XP_007057336	135	28	1757	1.85926	1	0.999986	99.7497
Annotation Cluster 4	Enrichment Score: 0.6447756060556024
Category	Term	Count	%	PValue	Genes	List Total	Pop Hits	Pop Total	Fold Enrichment	Bonferroni	Benjamini	FDR
UP_KEYWORDS	Kinase	8	0.35057	0.0923413	XP_007069714, XP_007069158, XP_007058349, XP_007062221, XP_007061834, XP_007059220, XP_007055179, XP_007062022	141	52	1852	2.02073	0.999837	0.663776	65.1462
INTERPRO	IPR011009:Protein kinase-like domain	6	0.262927	0.11154	XP_007069714, XP_007069158, XP_007058349, XP_007057761, XP_007059220, XP_007062022	135	34	1757	2.29673	1	0.997243	79.3937
INTERPRO	IPR017441:Protein kinase, ATP binding site	5	0.219106	0.117343	XP_007069714, XP_007069158, XP_007058349, XP_007059220, XP_007062022	135	25	1757	2.60296	1	0.995163	81.1207
INTERPRO	IPR008271:Serine/threonine-protein kinase, active site	4	0.175285	0.191686	XP_007069714, XP_007069158, XP_007058349, XP_007062022	135	20	1757	2.60296	1	0.99915	94.1706
INTERPRO	IPR000719:Protein kinase, catalytic domain	5	0.219106	0.207033	XP_007069714, XP_007069158, XP_007058349, XP_007059220, XP_007062022	135	31	1757	2.09916	1	0.999028	95.4873
GOTERM_MF_DIRECT	GO:0005524~ATP binding	9	0.394391	0.214882	XP_007069714, XP_007069158, XP_007058349, XP_007055917, XP_007065250, XP_007063145, XP_007059220, XP_007055179, XP_007062022	84	82	1176	1.53659	1	0.998657	92.4564
SMART	SM00220:S_TKc	4	0.175285	0.242323	XP_007069714, XP_007069158, XP_007058349, XP_007062022	69	22	872	2.29776	1	0.999895	94.1414
UP_KEYWORDS	Serine/threonine-protein kinase	3	0.131464	0.286336	XP_007069714, XP_007069158, XP_007058349	141	14	1852	2.81459	1	0.903233	97.452
GOTERM_MF_DIRECT	GO:0004674~protein serine/threonine kinase activity	3	0.131464	0.286429	XP_007069158, XP_007058349, XP_007059220	84	15	1176	2.8	1	0.99901	97.282
UP_KEYWORDS	ATP-binding	5	0.219106	0.623029	XP_007069714, XP_007069158, XP_007058349, XP_007055917, XP_007055179	141	56	1852	1.17275	1	0.984718	99.9975
UP_KEYWORDS	Nucleotide-binding	7	0.306748	0.633231	XP_007069714, XP_007069158, XP_007058349, XP_007055917, XP_007062556, XP_007055179, XP_007054785	141	85	1852	1.08169	1	0.983482	99.9982
Annotation Cluster 5	Enrichment Score: 0.31649205558749194
Category	Term	Count	%	PValue	Genes	List Total	Pop Hits	Pop Total	Fold Enrichment	Bonferroni	Benjamini	FDR
INTERPRO	IPR001611:Leucine-rich repeat	5	0.219106	0.382345	XP_007053374, XP_007060510, XP_007064053, XP_007071712, XP_007065741	135	41	1757	1.58717	1	0.999966	99.8396
INTERPRO	IPR000483:Cysteine-rich flanking region, C-terminal	3	0.131464	0.458408	XP_007053374, XP_007060510, XP_007065741	135	20	1757	1.95222	1	0.999995	99.9723
SMART	SM00082:LRRCT	3	0.131464	0.471288	XP_007053374, XP_007060510, XP_007065741	69	20	872	1.89565	1	0.999973	99.8521
INTERPRO	IPR003591:Leucine-rich repeat, typical subtype	4	0.175285	0.506926	XP_007053374, XP_007060510, XP_007064053, XP_007065741	135	35	1757	1.48741	1	0.999998	99.9921
SMART	SM00369:LRR_TYP	4	0.175285	0.524135	XP_007053374, XP_007060510, XP_007064053, XP_007065741	69	35	872	1.44431	1	0.999945	99.9496
UP_KEYWORDS	Leucine-rich repeat	3	0.131464	0.574998	XP_007053374, XP_007060510, XP_007065741	141	25	1852	1.57617	1	0.97873	99.9909
Annotation Cluster 6	Enrichment Score: 0.12215540311535723
Category	Term	Count	%	PValue	Genes	List Total	Pop Hits	Pop Total	Fold Enrichment	Bonferroni	Benjamini	FDR
GOTERM_MF_DIRECT	GO:0046872~metal ion binding	8	0.35057	0.478033	XP_007065293, XP_007058717, XP_007058657, XP_007060997, XP_007060245, XP_007064746, XP_007070088, XP_007070055	84	92	1176	1.21739	1	0.999977	99.9037
INTERPRO	IPR015880:Zinc finger, C2H2-like	4	0.175285	0.814885	XP_007065293, XP_007058717, XP_007060997, XP_007070055	135	56	1757	0.92963	1	1	100
INTERPRO	IPR007087:Zinc finger, C2H2	4	0.175285	0.824345	XP_007065293, XP_007058717, XP_007060997, XP_007070055	135	57	1757	0.91332	1	1	100
SMART	SM00355:ZnF_C2H2	4	0.175285	0.831565	XP_007065293, XP_007058717, XP_007060997, XP_007070055	69	56	872	0.902692	1	1	100
INTERPRO	IPR013087:Zinc finger C2H2-type/integrase DNA-binding domain	3	0.131464	0.917622	XP_007065293, XP_007060997, XP_007070055	135	52	1757	0.750855	1	1	100
Annotation Cluster 7	Enrichment Score: 0.0767254199225807
Category	Term	Count	%	PValue	Genes	List Total	Pop Hits	Pop Total	Fold Enrichment	Bonferroni	Benjamini	FDR
GOTERM_CC_DIRECT	GO:0016021~integral component of membrane	35	1.53374	0.763767	XP_007069884, XP_007060444, XP_007059303, XP_007071048, XP_007056808, XP_007058446, XP_007071548, XP_007070587, XP_007060915, XP_007056740, XP_007065755, XP_007068257, XP_007060481, XP_007070679, XP_007055916, XP_007060510, XP_007063773, XP_007055953, XP_007066769, XP_007069689, XP_007053926, XP_007068796, XP_007064053, XP_007072142, XP_007057577, XP_007065093, XP_007059738, XP_007060796, XP_0070…	74	546	1093	0.946812	1	1	99.9996
UP_KEYWORDS	Membrane	40	1.75285	0.860831	XP_007069884, XP_007060444, XP_007059303, XP_007071048, XP_007059654, XP_007058446, XP_007056808, XP_007071548, XP_007070587, XP_007060915, XP_007056740, XP_007068257, XP_007065755, XP_007060481, XP_007070679, XP_007055916, XP_007052636, XP_007060510, XP_007063773, XP_007064616, XP_007055953, XP_007066769, XP_007069689, XP_007065293, XP_007053926, XP_007068796, XP_007064053, XP_007072142, XP_0070…	141	585	1852	0.898103	1	0.999386	100
UP_KEYWORDS	Transmembrane helix	39	1.70903	0.866183	XP_007069884, XP_007060444, XP_007059303, XP_007071048, XP_007059654, XP_007056808, XP_007058446, XP_007071548, XP_007070587, XP_007060915, XP_007056740, XP_007068257, XP_007065755, XP_007060481, XP_007070679, XP_007055916, XP_007052636, XP_007060510, XP_007063773, XP_007064616, XP_007055953, XP_007066769, XP_007069689, XP_007053926, XP_007068796, XP_007064053, XP_007072142, XP_007057577, XP_0070…	141	573	1852	0.893988	1	0.999053	100
UP_KEYWORDS	Transmembrane	39	1.70903	0.866183	XP_007069884, XP_007060444, XP_007059303, XP_007071048, XP_007059654, XP_007056808, XP_007058446, XP_007071548, XP_007070587, XP_007060915, XP_007056740, XP_007068257, XP_007065755, XP_007060481, XP_007070679, XP_007055916, XP_007052636, XP_007060510, XP_007063773, XP_007064616, XP_007055953, XP_007066769, XP_007069689, XP_007053926, XP_007068796, XP_007064053, XP_007072142, XP_007057577, XP_0070…	141	573	1852	0.893988	1	0.999053	100
Annotation Cluster 8	Enrichment Score: 0.028721207758471468
Category	Term	Count	%	PValue	Genes	List Total	Pop Hits	Pop Total	Fold Enrichment	Bonferroni	Benjamini	FDR
SMART	SM01381:SM01381	5	0.219106	0.637738	XP_007052636, XP_007059303, XP_007068796, XP_007055953, XP_007070587	69	55	872	1.14888	1	0.999986	99.9969
KEGG_PATHWAY	cmy04080:Neuroactive ligand-receptor interaction	15	0.657318	0.988346	XP_007052636, XP_007059303, XP_007064580, XP_007060982, XP_007069965, XP_007061339, XP_007055953, XP_007070587, XP_007072727, XP_007072151, XP_007068257, XP_007068796, XP_007059738, XP_007065026, XP_007063622	360	319	4960	0.647858	1	0.999489	100
UP_KEYWORDS	G-protein coupled receptor	6	0.262927	0.999439	XP_007052636, XP_007068257, XP_007059303, XP_007068796, XP_007055953, XP_007070587	141	192	1852	0.410461	1	1	100
UP_KEYWORDS	Transducer	6	0.262927	0.999671	XP_007052636, XP_007068257, XP_007059303, XP_007068796, XP_007055953, XP_007070587	141	200	1852	0.394043	1	1	100
UP_KEYWORDS	Receptor	8	0.35057	0.999788	XP_007052636, XP_007068257, XP_007059303, XP_007068796, XP_007054354, XP_007055953, XP_007059738, XP_007070587	141	248	1852	0.423702	1	1	100
INTERPRO	IPR000276:G protein-coupled receptor, rhodopsin-like	6	0.262927	0.999837	XP_007052636, XP_007068257, XP_007059303, XP_007068796, XP_007055953, XP_007070587	135	208	1757	0.375427	1	1	100
INTERPRO	IPR017452:GPCR, rhodopsin-like, 7TM	6	0.262927	0.999885	XP_007052636, XP_007068257, XP_007059303, XP_007068796, XP_007055953, XP_007070587	135	213	1757	0.366615	1	1	100
