# Supplementary material for: Tissue and Temperature-Specific RNA-Seq Analysis Reveals Genomic Versatility and Adaptive Potential in Wild Sea Turtle Hatchlings (Caretta caretta)
Source: Animals (Basel). 2021 Oct 20;11(11):3013. doi: 10.3390/ani11113013 (PMC8614379; doi:10.3390/ani11113013)
Supplement: Supplementary file 1 [file animals-11-03013-s001.zip › Supplemental File5.xlsx]

## Sheet: brain
display name	name	stringdb::description	AverageShortestPathLength	BetweennessCentrality	ClosenessCentrality	ClusteringCoefficient	Degree	Eccentricity	NeighborhoodConnectivity	Radiality	Stress
ABCE1	8469.XP_007070201.1	ATP-binding cassette sub-family E member 1	4.42204	0.0291121	0.22614	0.24	25	12	21.48	0.931559	235632
SCLY	8469.XP_007067450.1	Selenocysteine lyase; The sequence of the model RefSeq protein was modified relative to its source genomic sequence to represent the inferred complete CDS: inserted 3 bases in 2 codons	0	0	0	0	0	0	0	Infinity	0
SPRY1	8469.XP_007056888.1	Protein sprouty homolog 1	8.59044	0	0.116409	0	1	15	5	0.848191	0
ALOX5AP	8469.XP_007064838.1	Arachidonate 5-lipoxygenase-activating protein	0	0	0	0	0	0	0	Infinity	0
PIKFYVE	8469.XP_007071882.1	1-phosphatidylinositol-3-phosphate 5-kinase; The sequence of the model RefSeq protein was modified relative to its source genomic sequence to represent the inferred complete CDS: inserted 2 bases in 1 codon	5.06757	0.00722761	0.197333	0.133333	6	12	6.5	0.918649	38032
XP_007054593.1	8469.XP_007054593.1	Inactive serine/threonine-protein kinase VRK3-like	0	0	0	0	0	0	0	Infinity	0
UY3_06590	8469.XP_007059359.1	Cell death activator CIDE-3; Derived by automated computational analysis using gene prediction method: Gnomon. Supporting evidence includes similarity to: 1 mRNA	1.5	0	0.666667	0	1	2	2	0.75	0
FMNL3	8469.XP_007064788.1	Formin-like protein 3	0	0	0	0	0	0	0	Infinity	0
DLK2	8469.XP_007071710.1	Protein delta like protein 2; Derived by automated computational analysis using gene prediction method: Gnomon. Supporting evidence includes similarity to: 2 Proteins	0	0	0	0	0	0	0	Infinity	0
HMCN1	8469.XP_007056786.1	Hemicentin 1; The sequence of the model RefSeq protein was modified relative to its source genomic sequence to represent the inferred complete CDS: inserted 1 base in 1 codon	0	0	0	0	0	0	0	Infinity	0
USP28	8469.XP_007060531.1	Ubiquitin carboxyl-terminal hydrolase 28; Belongs to the peptidase C19 family.	0	0	0	0	0	0	0	Infinity	0
ZFC3H1	8469.XP_007054878.1	Zinc finger C3H1 domain-containing protein	5.46674	0.000110547	0.182925	0.666667	4	13	12.25	0.910665	910
SGTA	8469.XP_007072233.1	Small glutamine-rich tetratricopeptide repeat-containing protein alpha	0	0	0	0	0	0	0	Infinity	0
LGI3	8469.XP_007066383.1	Leucine-rich repeat LGI family member 3	0	0	0	0	0	0	0	Infinity	0
PDE6G	8469.XP_007070990.1	Phosphodiesterase 6G; Retinal rod rhodopsin-sensitive cGMP 3'	1.66667	0	0.6	0	1	2	3	0.777778	0
DYX1C1	8469.XP_007056436.1	Dyslexia susceptibility 1 candidate gene 1 protein homolog	6.99272	0.002079	0.143006	0.333333	3	13	4.33333	0.880146	9982
OBFC1	8469.XP_007057923.1	CST complex subunit STN1	4.62994	0.0109034	0.215986	0.275	16	11	17.4375	0.927401	97950
PTCD1	8469.XP_007062793.1	Pentatricopeptide repeat-containing protein 1	0	0	0	0	0	0	0	Infinity	0
CMTM8	8469.XP_007067287.1	CKLF-like MARVEL transmembrane domain-containing protein 8	1.75	0	0.571429	0	1	2	4	0.8125	0
CMTM7	8469.XP_007067286.1	CKLF-like MARVEL transmembrane domain-containing protein 7	1	1	1	0	4	1	1	1	12
USP24	8469.XP_007062277.1	Ubiquitin carboxyl-terminal hydrolase 24; Belongs to the peptidase C19 family.	0	0	0	0	0	0	0	Infinity	0
ABCF1	8469.XP_007068295.1	ATP-binding cassette sub-family F member 1	5.421	0	0.184468	0	1	13	25	0.91158	0
CLASP1	8469.XP_007071952.1	CLIP-associating protein 1; Derived by automated computational analysis using gene prediction method: Gnomon. Supporting evidence includes similarity to: 3 mRNAs	0	0	0	0	0	0	0	Infinity	0
S1PR2	8469.XP_007071284.1	Sphingosine 1-phosphate receptor 2; Derived by automated computational analysis using gene prediction method: Gnomon. Supporting evidence includes similarity to: 24 Proteins; Belongs to the G-protein coupled receptor 1 family.	0	0	0	0	0	0	0	Infinity	0
RGS20	8469.XP_007064176.1	Regulator of G-protein signaling 20	0	0	0	0	0	0	0	Infinity	0
FAM63B	8469.XP_007056449.1	Protein FAM63B	0	0	0	0	0	0	0	Infinity	0
ERBB2	8469.XP_007062105.1	Receptor tyrosine-protein kinase erbB-2	5.81497	0.00457316	0.17197	0.333333	3	12	5.66667	0.903701	10714
NT5DC2	8469.XP_007055666.1	5'-nucleotidase domain-containing protein 2	0	0	0	0	0	0	0	Infinity	0
ERBB4	8469.XP_007068369.1	Receptor tyrosine-protein kinase erbB-4	6.5343	0	0.153038	1	2	13	3.5	0.889314	0
UY3_07829	8469.XP_007060660.1	Synaptotagmin-like protein 2; Microtubule-associated protein futsch-like	0	0	0	0	0	0	0	Infinity	0
ACAN	8469.XP_007060436.1	Aggrecan core protein	1.85714	0.714286	0.538462	0	3	3	1.66667	0.714286	30
STRN3	8469.XP_007063752.1	Striatin-3	5.22973	0.000349782	0.191214	0.833333	4	13	5.75	0.915405	2360
UY3_15218	8469.XP_007068511.1	The sequence of the model RefSeq protein was modified relative to its source genomic sequence to represent the inferred complete CDS: substituted 1 base at 1 genomic stop codon	0	0	0	0	0	0	0	Infinity	0
MTIF3	8469.XP_007057945.1	Translation initiation factor IF-3; Derived by automated computational analysis using gene prediction method: Gnomon. Supporting evidence includes similarity to: 9 Proteins	5.20062	1.48612e-06	0.192285	0.9	5	13	31.6	0.915988	36
WIZ	8469.XP_007069875.1	Protein Wiz; Derived by automated computational analysis using gene prediction method: Gnomon. Supporting evidence includes similarity to: 3 mRNAs	1.5	0	0.666667	0	1	2	2	0.75	0
MOSPD2	8469.XP_007070567.1	Motile sperm domain-containing protein 2	0	0	0	0	0	0	0	Infinity	0
USP11	8469.XP_007052947.1	Ubiquitin carboxyl-terminal hydrolase 11	0	0	0	0	0	0	0	Infinity	0
RGS16	8469.XP_007061206.1	Regulator of G-protein signaling 16; Derived by automated computational analysis using gene prediction method: Gnomon. Supporting evidence includes similarity to: 34 Proteins	2.57143	0	0.388889	0	1	4	3	0.47619	0
TM2D2	8469.XP_007053508.1	TM2 domain-containing protein 2	0	0	0	0	0	0	0	Infinity	0
POLDIP2	8469.XP_007057847.1	Polymerase delta-interacting protein 2	0	0	0	0	0	0	0	Infinity	0
B4GALT5	8469.XP_007059802.1	Beta-1	0	0	0	0	0	0	0	Infinity	0
CAMK1G	8469.XP_007059638.1	Calcium/calmodulin-dependent protein kinase type 1G	0	0	0	0	0	0	0	Infinity	0
ECT2L	8469.XP_007058139.1	Epithelial cell-transforming sequence 2 oncogene-like	5.39293	0.002079	0.185428	0.333333	3	13	21.3333	0.912141	19748
B4GALT6	8469.XP_007058856.1	Beta-1	10.1414	0	0.098606	1	2	17	6	0.817173	0
ITGB1BP1	8469.XP_007053241.1	Integrin beta-1-binding protein 1 isoform X1	8.7578	0.002079	0.114184	0	2	16	1.5	0.844844	14166
SAG	8469.XP_007052695.1	S-arrestin	8.55094	1.08169e-06	0.116946	0	2	16	2	0.848981	2
UY3_03304	8469.XP_007055955.1	Phosphodiesterase; cAMP-specific 3'	6.23805	0.00544975	0.160307	0.1	5	14	9.6	0.895239	254332
LATS1	8469.XP_007057092.1	Serine/threonine-protein kinase LATS1	1	1	1	0	2	1	1	1	2
CKAP4	8469.XP_007066211.1	Cytoskeleton-associated protein 4	1.66667	0	0.6	0	1	2	3	0.777778	0
ARID1B	8469.XP_007063696.1	AT-rich interactive domain-containing protein 1B-like	5.88462	3.09053e-07	0.169935	0.833333	4	12	6.75	0.902308	2
SENP2	8469.XP_007052702.1	Sentrin-specific protease 2	5.45634	0.000581842	0.183273	0	2	12	11	0.910873	3818
ARID1A	8469.XP_007064872.1	AT-rich interactive domain-containing protein 1A isoform X1	4.95634	0.0125481	0.201762	0.380952	7	11	10.1429	0.920873	57474
TRNAU1AP	8469.XP_007064903.1	tRNA selenocysteine 1-associated protein 1	5.19335	0.00309532	0.192554	0.333333	6	13	16.1667	0.916133	33072
ARAP1	8469.XP_007068902.1	Arf-GAP with Rho-GAP domain	0	0	0	0	0	0	0	Infinity	0
ARAP3	8469.XP_007060355.1	Arf-GAP with Rho-GAP domain	0	0	0	0	0	0	0	Infinity	0
CKAP2	8469.XP_007068134.1	Cytoskeleton-associated protein 2	4.83992	1.356e-06	0.206615	0.945455	11	12	24.7273	0.923202	24
PDE4D	8469.XP_007053941.1	cAMP-specific 3'	6.23805	0.00544975	0.160307	0.1	5	14	9.6	0.895239	254332
IFLTD1	8469.XP_007063061.1	Intermediate filament tail domain-containing protein 1	0	0	0	0	0	0	0	Infinity	0
ABCC2	8469.XP_007059153.1	Canalicular multispecific organic anion transporter 1	0	0	0	0	0	0	0	Infinity	0
PSTK	8469.XP_007053126.1	phosphoseryl-tRNA kinase; Derived by automated computational analysis using gene prediction method: Gnomon. Supporting evidence includes similarity to: 1 mRNA	6.19231	0	0.161491	0	1	14	6	0.896154	0
POLH	8469.XP_007071791.1	DNA polymerase eta	4.95634	3.05688e-05	0.201762	0.866667	6	11	26.3333	0.920873	1932
POLE	8469.XP_007071402.1	DNA polymerase epsilon catalytic subunit A	4.61746	0.00729083	0.216569	0.344615	26	12	18.8846	0.927651	108224
USP30	8469.XP_007058448.1	Ubiquitin carboxyl-terminal hydrolase 30; Belongs to the peptidase C19 family.	0	0	0	0	0	0	0	Infinity	0
TMEM109	8469.XP_007071864.1	Transmembrane protein 109	0	0	0	0	0	0	0	Infinity	0
POLI	8469.XP_007055390.1	DNA polymerase iota-like	4.98233	0.00390326	0.200709	0.166667	4	12	14.75	0.920353	25828
PDE4B	8469.XP_007063481.1	Phosphodiesterase; cAMP-specific 3'	6.23805	0.00544975	0.160307	0.1	5	14	9.6	0.895239	254332
ZC3H7A	8469.XP_007058193.1	Zinc finger CCCH domain-containing protein 7A	0	0	0	0	0	0	0	Infinity	0
TMEM101	8469.XP_007061963.1	Transmembrane protein 101; The sequence of the model RefSeq protein was modified relative to its source genomic sequence to represent the inferred complete CDS: inserted 1 base in 1 codon	1.33333	0.666667	0.75	0	2	2	1.5	0.833333	4
SENP7	8469.XP_007061673.1	Sentrin-specific protease 7	5.2079	0	0.192016	1	3	12	7	0.915842	0
SENP6	8469.XP_007056867.1	Sentrin-specific protease 6	5.10395	0.00139471	0.195927	0.5	4	12	6	0.917921	7152
ELAVL3	8469.XP_007058298.1	ELAV-like protein 3	0	0	0	0	0	0	0	Infinity	0
SLC2A8	8469.XP_007061147.1	Solute carrier family 2	5.78794	0.0093086	0.172773	0	2	14	10.5	0.904241	103628
CHTF18	8469.XP_007058645.1	Chromosome transmission fidelity protein 18 homolog	4.8815	0.00870249	0.204855	0.391813	19	12	19.1053	0.92237	79210
LDB2	8469.XP_007055449.1	LIM domain-binding protein 2; Derived by automated computational analysis using gene prediction method: Gnomon. Supporting evidence includes similarity to: 1 mRNA	1.5	0	0.666667	0	1	2	2	0.75	0
SLC2A4	8469.XP_007055205.1	Solute carrier family 2	0	0	0	0	0	0	0	Infinity	0
GTDC1	8469.XP_007057540.1	Glycosyltransferase-like domain-containing protein 1	0	0	0	0	0	0	0	Infinity	0
ELAVL4	8469.XP_007062213.1	ELAV-like protein 4 isoform X1; Belongs to the RRM elav family.	0	0	0	0	0	0	0	Infinity	0
DOCK7	8469.XP_007059103.1	Dedicator of cytokinesis protein 7; The sequence of the model RefSeq protein was modified relative to its source genomic sequence to represent the inferred complete CDS: inserted 2 bases in 1 codon; Belongs to the DOCK family.	0	0	0	0	0	0	0	Infinity	0
USP34	8469.XP_007064189.1	Ubiquitin carboxyl-terminal hydrolase 34; The sequence of the model RefSeq protein was modified relative to its source genomic sequence to represent the inferred complete CDS: inserted 1 base in 1 codon; deleted 1 base in 1 codon	5.59979	0.00190517	0.178578	0.166667	4	13	5.5	0.908004	9912
PDE3B	8469.XP_007057160.1	Phosphodiesterase 3B; Derived by automated computational analysis using gene prediction method: Gnomon. Supporting evidence includes similarity to: 3 mRNAs	6.27339	0	0.159403	1	2	14	14.5	0.894532	0
DOCK9	8469.XP_007066292.1	Dedicator of cytokinesis protein 9 isoform X1; Belongs to the DOCK family.	0	0	0	0	0	0	0	Infinity	0
UY3_03023	8469.XP_007055651.1	Protein shisa-5-like	0	0	0	0	0	0	0	Infinity	0
ACADVL	8469.XP_007071411.1	Very long-chain specific acyl-CoA dehydrogenase	6.74324	0.00337588	0.148297	0.4	5	15	5.8	0.885135	17740
DOCK5	8469.XP_007065566.1	Dedicator of cytokinesis protein 5; Belongs to the DOCK family.	1	0	1	0	1	1	1	1	0
UY3_02735	8469.XP_007055343.1	Diacylglycerol O-acyltransferase 2-like	9.30665	0	0.10745	1	2	17	4	0.833867	0
B4GALT2	8469.XP_007061597.1	Beta-1	8.19543	0.0040695	0.122019	0.666667	3	15	4.66667	0.856091	67554
GRSF1	8469.XP_007065973.1	G-rich sequence factor 1	0	0	0	0	0	0	0	Infinity	0
DLG5	8469.XP_007067327.1	Disks large homolog 5	0	0	0	0	0	0	0	Infinity	0
TMEM116	8469.XP_007058382.1	Transmembrane protein 116	1	0	1	0	1	1	1	1	0
ATG16L1	8469.XP_007052653.1	Autophagy-related protein 16-1 isoform X1	5.83472	0	0.171388	1	3	12	6	0.903306	0
TMEM115	8469.XP_007061896.1	Transmembrane protein 115	0	0	0	0	0	0	0	Infinity	0
DNMBP	8469.XP_007072723.1	The sequence of the model RefSeq protein was modified relative to its source genomic sequence to represent the inferred complete CDS: inserted 1 base in 1 codon	1	0	1	0	1	1	1	1	0
DNAJC17	8469.XP_007055846.1	DnaJ heat shock protein family (Hsp40) member C17; dnaJ homolog subfamily C member 17	0	0	0	0	0	0	0	Infinity	0
DNAJC13	8469.XP_007064367.1	dnaJ homolog subfamily C member 13	0	0	0	0	0	0	0	Infinity	0
A2ML1	8469.XP_007055727.1	Alpha-2-macroglobulin-like protein 1-like	0	0	0	0	0	0	0	Infinity	0
TBCD	8469.XP_007072647.1	Tubulin-specific chaperone D; The sequence of the model RefSeq protein was modified relative to its source genomic sequence to represent the inferred complete CDS: substituted 1 base at 1 genomic stop codon	0	0	0	0	0	0	0	Infinity	0
ASPSCR1	8469.XP_007063445.1	Tether containing UBX domain for GLUT4	7.98545	0.00415368	0.125228	0	2	15	2.5	0.860291	23724
FAM211B	8469.XP_007063837.1	Leucine-rich repeat-containing protein FAM211B	0	0	0	0	0	0	0	Infinity	0
XP_007067670.1	8469.XP_007067670.1	Doublecortin domain-containing protein 2-like	0	0	0	0	0	0	0	Infinity	0
ACBD4	8469.XP_007053903.1	Acyl-CoA-binding domain-containing protein 4; The sequence of the model RefSeq protein was modified relative to its source genomic sequence to represent the inferred complete CDS: substituted 1 base at 1 genomic stop codon	0	0	0	0	0	0	0	Infinity	0
EXOSC5	8469.XP_007067374.1	Exosome complex component RRP46	5.03015	0.0183109	0.198801	0.30303	12	11	20.1667	0.919397	187118
PDZD7	8469.XP_007066972.1	PDZ domain-containing protein 7	8.69127	0	0.115058	0	1	16	5	0.846175	0
ZC3H14	8469.XP_007055992.1	Zinc finger CCCH-type containing 14; The sequence of the model RefSeq protein was modified relative to its source genomic sequence to represent the inferred complete CDS: substituted 1 base at 1 genomic stop codon	6.99064	0	0.143048	0	1	13	9	0.880187	0
MARK3	8469.XP_007062971.1	MAP/microtubule affinity-regulating kinase 3 isoform X1	8.02495	0	0.124611	0	1	15	3	0.859501	0
MYH11	8469.XP_007058208.1	Myosin-11; Derived by automated computational analysis using gene prediction method: Gnomon. Supporting evidence includes similarity to: 4 mRNAs	1	0	1	0	1	1	1	1	0
LRRIQ4	8469.XP_007055558.1	Leucine-rich repeat and IQ domain-containing protein 4	1	0	1	0	1	1	1	1	0
EP400	8469.XP_007055031.1	E1A-binding protein p400-like	5.48233	0.00732761	0.182404	0.2	6	11	5.33333	0.910353	35366
XP_007057373.1	8469.XP_007057373.1	Probable low affinity copper uptake protein 2-like	0	0	0	0	0	0	0	Infinity	0
COBLL1	8469.XP_007056779.1	Cordon-bleu protein-like 1	2	0	0.5	0	1	3	4	0.75	0
SCIN	8469.XP_007053275.1	Adseverin	0	0	0	0	0	0	0	Infinity	0
SDCBP	8469.XP_007059526.1	Syndecan binding protein; Syntenin-1 isoform X1	0	0	0	0	0	0	0	Infinity	0
DPP4	8469.XP_007056780.1	Dipeptidyl peptidase 4	0	0	0	0	0	0	0	Infinity	0
DPP3	8469.XP_007056272.1	Dipeptidyl aminopeptidase III; Dipeptidyl peptidase 3; Belongs to the peptidase M49 family.	1.66667	0	0.6	0	1	2	3	0.777778	0
ZFP36L1	8469.XP_007054315.1	Zinc finger protein 36	5.34823	0	0.186978	1	2	13	11	0.913035	0
ARHGAP12	8469.XP_007054968.1	Rho GTPase-activating protein 12	0	0	0	0	0	0	0	Infinity	0
CPLX4	8469.XP_007069486.1	Protein ERGIC-53; The sequence of the model RefSeq protein was modified relative to its source genomic sequence to represent the inferred complete CDS: inserted 1 base in 1 codon	0	0	0	0	0	0	0	Infinity	0
2020-03-11	8469.XP_007065090.1	E3 ubiquitin-protein ligase MARCH11	0	0	0	0	0	0	0	Infinity	0
NALCN	8469.XP_007066299.1	Sodium leak channel non-selective protein; The sequence of the model RefSeq protein was modified relative to its source genomic sequence to represent the inferred complete CDS: deleted 2 bases in 1 codon	0	0	0	0	0	0	0	Infinity	0
NID1	8469.XP_007069072.1	Nidogen 1; Derived by automated computational analysis using gene prediction method: Gnomon. Supporting evidence includes similarity to: 1 EST	1.8	0.4	0.555556	0	2	3	2	0.733333	8
UY3_17591	8469.XP_007070911.1	Membrane progestin receptor alpha-B-like	0	0	0	0	0	0	0	Infinity	0
LTBP3	8469.XP_007070476.1	Latent-transforming growth factor beta-binding protein 3-like	0	0	0	0	0	0	0	Infinity	0
LTBP2	8469.XP_007065284.1	Latent-transforming growth factor beta-binding protein 2	0	0	0	0	0	0	0	Infinity	0
CTTNBP2	8469.XP_007053175.1	Cortactin-binding protein 2; The sequence of the model RefSeq protein was modified relative to its source genomic sequence to represent the inferred complete CDS: inserted 2 bases in 1 codon	4.81497	0.00648449	0.207686	0.333333	6	13	10.1667	0.923701	30478
H6PD	8469.XP_007053785.1	GDH/6PGL endoplasmic bifunctional protein	5.74636	0.0113759	0.174023	0.0952381	7	13	4	0.905073	50214
PDE9A	8469.XP_007064543.1	Phosphodiesterase; The sequence of the model RefSeq protein was modified relative to its source genomic sequence to represent the inferred complete CDS: substituted 1 base at 1 genomic stop codon	8.17775	7.85022e-05	0.122283	0	6	16	4.16667	0.856445	254
ELMO3	8469.XP_007069329.1	Engulfment and cell motility 3; The sequence of the model RefSeq protein was modified relative to its source genomic sequence to represent the inferred complete CDS: substituted 1 base at 1 genomic stop codon	0	0	0	0	0	0	0	Infinity	0
ELMO2	8469.XP_007067805.1	Engulfment and cell motility protein 2 isoform X1	1	0	1	0	1	1	1	1	0
COL4A6	8469.XP_007060206.1	Collagen alpha-6(IV) chain; Belongs to the type IV collagen family.	0	0	0	0	0	0	0	Infinity	0
COL4A4	8469.XP_007055095.1	Collagen alpha-4(IV) chain; Belongs to the type IV collagen family.	0	0	0	0	0	0	0	Infinity	0
TMEM139	8469.XP_007066524.1	The sequence of the model RefSeq protein was modified relative to its source genomic sequence to represent the inferred complete CDS: substituted 1 base at 1 genomic stop codon	0	0	0	0	0	0	0	Infinity	0
RGS9BP	8469.XP_007058713.1	Regulator of G-protein signaling 9-binding protein	0	0	0	0	0	0	0	Infinity	0
PHOSPHO1	8469.XP_007061975.1	Phosphoethanolamine/phosphocholine phosphatase	0	0	0	0	0	0	0	Infinity	0
UY3_14641	8469.XP_007067847.1	FRAS1-related extracellular matrix protein 2-like	0	0	0	0	0	0	0	Infinity	0
PDIA6	8469.XP_007053233.1	Protein disulfide-isomerase A6; Belongs to the protein disulfide isomerase family.	1.44444	0.444444	0.692308	0.333333	6	3	3	0.925926	36
WRNIP1	8469.XP_007058884.1	ATPase WRNIP1	0	0	0	0	0	0	0	Infinity	0
ARID5B	8469.XP_007054900.1	AT-rich interactive domain-containing protein 5B	0	0	0	0	0	0	0	Infinity	0
UY3_04916	8469.XP_007057597.1	MORC family CW-type zinc finger protein 2B; Uncharacterized protein LOC102944284	4.8264	0.000570147	0.207194	0.628205	13	12	21.1538	0.923472	4684
CA13	8469.XP_007052983.1	Carbonic anhydrase 13	0	0	0	0	0	0	0	Infinity	0
UY3_07716	8469.XP_007060541.1	Uncharacterized protein C11orf57 homolog	0	0	0	0	0	0	0	Infinity	0
POGZ	8469.XP_007068178.1	Pogo transposable element with ZNF domain isoform X1	9.65385	0	0.103586	0	1	16	2	0.826923	0
UBE2B	8469.XP_007053629.1	Ubiquitin-conjugating enzyme E2 B; Derived by automated computational analysis using gene prediction method: Gnomon. Supporting evidence includes similarity to: 4 mRNAs	5.24948	0.00135413	0.190495	0	2	12	22.5	0.91501	8486
EFTUD2	8469.XP_007053888.1	116 kDa U5 small nuclear ribonucleoprotein component isoform X1	4.36175	0.0579445	0.229266	0.268848	38	12	18.0789	0.932765	564888
TMEM140	8469.XP_007064137.1	Transmembrane protein 140	0	0	0	0	0	0	0	Infinity	0
ARID4A	8469.XP_007065383.1	Proteasome endopeptidase complex; AT-rich interactive domain-containing protein 4A isoform X1; Belongs to the peptidase T1A family.	5.19958	0.00633683	0.192323	0.194444	9	11	6.55556	0.916008	34816
XP_007056579.1	8469.XP_007056579.1	Cat eye syndrome critical region protein 5-like	0	0	0	0	0	0	0	Infinity	0
GOLT1B	8469.XP_007071271.1	Vesicle transport protein GOT1B	1	0	1	0	1	1	1	1	0
DFNA5	8469.XP_007071651.1	DFNA5	0	0	0	0	0	0	0	Infinity	0
TOMM6	8469.XP_007065233.1	Translocase of outer mitochondrial membrane 6; Mitochondrial import receptor subunit TOM6 homolog	0	0	0	0	0	0	0	Infinity	0
TJP2	8469.XP_007065634.1	Tight junction protein ZO-2 isoform X1	6.86486	0.00310444	0.145669	0.466667	6	13	4.33333	0.882703	35374
RAB3GAP1	8469.XP_007060942.1	RAB3 GTPase activating protein catalytic subunit 1; The sequence of the model RefSeq protein was modified relative to its source genomic sequence to represent the inferred complete CDS: substituted 1 base at 1 genomic stop codon	0	0	0	0	0	0	0	Infinity	0
UY3_09166	8469.XP_007062162.1	CST complex subunit CTC1-like	4.85447	0.00672577	0.205996	0	4	12	13	0.922911	51156
PRPF31	8469.XP_007070682.1	pre-mRNA processing factor 31; U4/U6 small nuclear ribonucleoprotein Prp31	4.55613	0.0205924	0.219484	0.404598	30	11	26.6667	0.928877	224502
B9D1	8469.XP_007060130.1	B9 domain-containing protein 1	6.01351	0.00245765	0.166292	0.6	6	12	6.66667	0.89973	32812
AXL	8469.XP_007070985.1	Tyrosine-protein kinase receptor UFO	0	0	0	0	0	0	0	Infinity	0
TJP1	8469.XP_007056458.1	Tight junction protein ZO-1-like; Belongs to the MAGUK family.	6.86279	0.0051921	0.145713	0.285714	8	13	3.375	0.882744	47184
PUS7L	8469.XP_007064042.1	Pseudouridylate synthase 7 homolog-like protein	5.01767	0	0.199296	1	9	11	39	0.919647	0
PDZK1IP1	8469.XP_007061664.1	PDZK1-interacting protein 1	0	0	0	0	0	0	0	Infinity	0
STAC3	8469.XP_007052909.1	SH3 and cysteine-rich domain-containing protein 3	0	0	0	0	0	0	0	Infinity	0
UY3_04366	8469.XP_007057035.1	Tyrosine-protein kinase RYK; Uncharacterized protein LOC102946533	3.42857	0	0.291667	0	1	5	2	0.190476	0
RANBP2	8469.XP_007054685.1	E3 SUMO-protein ligase RanBP2	5.02495	0.00837595	0.199007	0.428571	7	12	9	0.919501	79558
CORIN	8469.XP_007071086.1	Atrial natriuretic peptide-converting enzyme	0	0	0	0	0	0	0	Infinity	0
DCPS	8469.XP_007066437.1	Scavenger mRNA-decapping enzyme DcpS; m7GpppX diphosphatase	0	0	0	0	0	0	0	Infinity	0
DISC1	8469.XP_007062479.1	Disrupted in schizophrenia 1 protein; The sequence of the model RefSeq protein was modified relative to its source genomic sequence to represent the inferred complete CDS: deleted 1 base in 1 codon	5.99792	0.00662723	0.166724	0	2	12	4	0.900042	38056
MAP4K5	8469.XP_007066052.1	Mitogen-activated protein kinase kinase kinase kinase 5 isoform X1	0	0	0	0	0	0	0	Infinity	0
CTNNA2	8469.XP_007061511.1	Catenin alpha-2 isoform X1	6.86902	0	0.145581	1	2	13	7.5	0.88262	0
TBL1X	8469.XP_007065139.1	F-box-like/WD repeat-containing protein TBL1X isoform X1	6.23909	0.00181247	0.16028	0	3	13	5	0.895218	8122
XP_007069589.1	8469.XP_007069589.1	The sequence of the model RefSeq protein was modified relative to its source genomic sequence to represent the inferred complete CDS: deleted 1 base in 1 codon; substituted 1 base at 1 genomic stop codon	1.8	0	0.555556	1	2	3	3	0.733333	0
DZANK1	8469.XP_007063210.1	Double zinc ribbon and ankyrin repeat-containing protein 1	0	0	0	0	0	0	0	Infinity	0
XP_007064849.1	8469.XP_007064849.1	Rho-associated protein kinase 1-like	1	0	1	0	1	1	1	1	0
UY3_10891	8469.XP_007064029.1	Transcription initiation factor TFIID subunit 7; Aryl-hydrocarbon-interacting protein-like 1-like	0	0	0	0	0	0	0	Infinity	0
TRAK1	8469.XP_007067394.1	Trafficking kinesin-binding protein 1-like isoform X1	1.33333	0.666667	0.75	0	2	2	1.5	0.833333	4
TUBD1	8469.XP_007057698.1	Tubulin delta chain; Derived by automated computational analysis using gene prediction method: Gnomon. Supporting evidence includes similarity to: 1 mRNA	5.42516	0.00265985	0.184326	0.333333	3	13	6	0.911497	28632
PRIM1	8469.XP_007066656.1	DNA primase small subunit	4.74116	0.000772449	0.210919	0.514706	17	12	23.5882	0.925177	8998
SLC20A1	8469.XP_007066078.1	Phosphate transporter; Sodium-phosphate symporter which plays a fundamental housekeeping role in phosphate transport.	0	0	0	0	0	0	0	Infinity	0
DNASE1L3	8469.XP_007060056.1	Deoxyribonuclease gamma	0	0	0	0	0	0	0	Infinity	0
MRRF	8469.XP_007061030.1	Ribosome-recycling factor	4.97817	0.000851215	0.200877	0.781818	11	13	26.1818	0.920437	8406
SGK1	8469.XP_007058111.1	Serine/threonine-protein kinase Sgk1; The sequence of the model RefSeq protein was modified relative to its source genomic sequence to represent the inferred complete CDS: deleted 2 bases in 1 codon	5.45426	0.002079	0.183343	0	2	11	6	0.910915	9826
MAPRE1	8469.XP_007062541.1	Microtubule-associated protein RP/EB family member 1; The sequence of the model RefSeq protein was modified relative to its source genomic sequence to represent the inferred complete CDS: deleted 2 bases in 1 codon	1.5	0	0.666667	0	1	2	2	0.75	0
MAPRE3	8469.XP_007062869.1	Microtubule-associated protein RP/EB family member 3	1	1	1	0	2	1	1	1	2
UY3_16950	8469.XP_007070231.1	Pantothenate kinase 4-like	1	0	1	1	2	1	2	1	0
B3GNT4	8469.XP_007058363.1	UDP-GlcNAc:betaGal beta-1	7.22869	0.0122016	0.138338	0.333333	3	14	3.66667	0.875426	164760
NME8	8469.XP_007065964.1	Thioredoxin domain-containing protein 3	5.71518	0.0292013	0.174973	0.1	5	11	5.2	0.905696	264584
BBS12	8469.XP_007056885.1	Bardet-Biedl syndrome 12 protein	5.33576	0.00433464	0.187415	0.166667	4	13	5	0.913285	25690
PRPF18	8469.XP_007060986.1	pre-mRNA-splicing factor 18	4.87838	0.000393019	0.204986	0.678571	8	12	20.5	0.922432	4034
RAD51D	8469.XP_007067196.1	DNA repair protein RAD51 homolog 4	4.95738	0.00583793	0.201719	0.406593	14	12	17.2143	0.920852	67760
XP_007053433.1	8469.XP_007053433.1	Uncharacterized protein LOC102939702	0	0	0	0	0	0	0	Infinity	0
IL17RC	8469.XP_007066027.1	Interleukin-17 receptor C	0	0	0	0	0	0	0	Infinity	0
IL17RE	8469.XP_007066026.1	Interleukin-17 receptor E	0	0	0	0	0	0	0	Infinity	0
RHOF	8469.XP_007058431.1	Rho-related GTP-binding protein RhoF; Belongs to the small GTPase superfamily. Rho family.	0	0	0	0	0	0	0	Infinity	0
AP3B1	8469.XP_007066752.1	AP-3 complex subunit beta-1	0	0	0	0	0	0	0	Infinity	0
STRBP	8469.XP_007061021.1	Spermatid perinuclear RNA-binding protein isoform X1	6.13617	0	0.162968	1	2	14	11	0.897277	0
PRMT7	8469.XP_007054071.1	Protein arginine N-methyltransferase 7; Belongs to the class I-like SAM-binding methyltransferase superfamily. Protein arginine N- methyltransferase family.	0	0	0	0	0	0	0	Infinity	0
MANBA	8469.XP_007054445.1	Beta-mannosidase	0	0	0	0	0	0	0	Infinity	0
UY3_09994	8469.XP_007063000.1	Homeobox protein GHOX-7-like	0	0	0	0	0	0	0	Infinity	0
CC2D2A	8469.XP_007055456.1	Coiled-coil and C2 domain-containing protein 2A	6.98337	7.57181e-06	0.143197	0.666667	6	13	5.66667	0.880333	24
UY3_15098	8469.XP_007068357.1	Protein FAM212A-like	0	0	0	0	0	0	0	Infinity	0
TNFAIP8L1	8469.XP_007072162.1	Tumor necrosis factor alpha-induced protein 8-like protein 1	0	0	0	0	0	0	0	Infinity	0
STAB1	8469.XP_007055667.1	Stabilin-1	0	0	0	0	0	0	0	Infinity	0
KIF13A	8469.XP_007054948.1	The sequence of the model RefSeq protein was modified relative to its source genomic sequence to represent the inferred complete CDS: substituted 1 base at 1 genomic stop codon; Belongs to the TRAFAC class myosin-kinesin ATPase superfamily. Kinesin family.	0	0	0	0	0	0	0	Infinity	0
UY3_15748	8469.XP_007069018.1	Interleukin-1 receptor type 1-like	7.98649	0	0.125212	0	1	14	3	0.86027	0
PP2D1	8469.XP_007053297.1	Protein phosphatase 2C-like domain-containing protein 1	0	0	0	0	0	0	0	Infinity	0
HINT1	8469.XP_007056860.1	Histidine triad nucleotide-binding protein 1	0	0	0	0	0	0	0	Infinity	0
XP_007059758.1	8469.XP_007059758.1	Uncharacterized protein C11orf65 homolog	0	0	0	0	0	0	0	Infinity	0
UY3_12210	8469.XP_007065391.1	Protein SIX6OS1	0	0	0	0	0	0	0	Infinity	0
OLA1	8469.XP_007060593.1	Obg-like ATPase 1	5.57588	0.002079	0.179344	0.333333	3	13	6.33333	0.908482	6424
SH3KBP1	8469.XP_007070546.1	SH3 domain-containing kinase-binding protein 1; Derived by automated computational analysis using gene prediction method: Gnomon. Supporting evidence includes similarity to: 3 mRNAs	0	0	0	0	0	0	0	Infinity	0
DAZAP1	8469.XP_007072131.1	DAZ-associated protein 1; The sequence of the model RefSeq protein was modified relative to its source genomic sequence to represent the inferred complete CDS: deleted 1 base in 1 codon	0	0	0	0	0	0	0	Infinity	0
TRAM1	8469.XP_007054097.1	Translocating chain-associated membrane protein 1-like 1; The sequence of the model RefSeq protein was modified relative to its source genomic sequence to represent the inferred complete CDS: substituted 1 base at 1 genomic stop codon	2.66667	0	0.375	0	1	4	3	0.722222	0
INVS	8469.XP_007061879.1	Inversin	7.97921	0.002079	0.125326	0	2	14	3.5	0.860416	18156
ACVRL1	8469.XP_007064784.1	Serine/threonine-protein kinase receptor R3	7.28794	0	0.137213	0	1	14	3	0.874241	0
CC2D1B	8469.XP_007062261.1	Coiled-coil and C2 domain-containing protein 1B	0	0	0	0	0	0	0	Infinity	0
ATR	8469.XP_007055059.1	Serine/threonine-protein kinase ATR	4.54054	0.0122766	0.220238	0.457143	21	11	20.7619	0.929189	93704
ITM2B	8469.XP_007063514.1	Integral membrane protein 2B	0	0	0	0	0	0	0	Infinity	0
CORO7	8469.XP_007054552.1	Coronin-7; Belongs to the WD repeat coronin family.	6.27963	0.00622403	0.159245	0	2	14	5	0.894407	85458
TMCC2	8469.XP_007065168.1	Transmembrane and coiled-coil domains protein 2	1	0	1	0	1	1	1	1	0
ATM	8469.XP_007059747.1	Serine-protein kinase ATM; The sequence of the model RefSeq protein was modified relative to its source genomic sequence to represent the inferred complete CDS: deleted 1 base in 1 codon; Belongs to the PI3/PI4-kinase family.	4.48337	0.00789862	0.223047	0.385965	19	11	16.5789	0.930333	89712
TMCC3	8469.XP_007069292.1	Transmembrane and coiled-coil domain family 3; Derived by automated computational analysis using gene prediction method: Gnomon. Supporting evidence includes similarity to: 1 mRNA	0	0	0	0	0	0	0	Infinity	0
PDE3A	8469.XP_007071266.1	Phosphodiesterase; cGMP-inhibited 3'	6.2422	0.00416853	0.1602	0.333333	3	14	12.6667	0.895156	183634
CCDC88C	8469.XP_007055511.1	Coiled-coil domain containing 88C; Derived by automated computational analysis using gene prediction method: Gnomon. Supporting evidence includes similarity to: 3 mRNAs	0	0	0	0	0	0	0	Infinity	0
OCLN	8469.XP_007059290.1	Occludin	7.85967	0	0.127232	1	3	14	5.66667	0.862807	0
CCDC88A	8469.XP_007070123.1	Girdin isoform X1	0	0	0	0	0	0	0	Infinity	0
UY3_09033	8469.XP_007062063.1	Uncharacterized protein C17orf53 homolog	0	0	0	0	0	0	0	Infinity	0
MANF	8469.XP_007061910.1	Mesencephalic astrocyte derived neurotrophic factor; Derived by automated computational analysis using gene prediction method: Gnomon. Supporting evidence includes similarity to: 22 Proteins	1.44444	0.444444	0.692308	0.4	5	2	3.4	0.925926	36
LRP2BP	8469.XP_007063713.1	LRP2-binding protein	0	0	0	0	0	0	0	Infinity	0
PARP16	8469.XP_007053564.1	poly(ADP-ribose) polymerase family member 16; Mono [ADP-ribose] polymerase PARP16	0	0	0	0	0	0	0	Infinity	0
TMEM50B	8469.XP_007063650.1	Transmembrane protein 50B	1	0	1	0	1	1	1	1	0
PTPRN2	8469.XP_007054190.1	Receptor-type tyrosine-protein phosphatase N2; Derived by automated computational analysis using gene prediction method: Gnomon. Supporting evidence includes similarity to: 12 Proteins	0	0	0	0	0	0	0	Infinity	0
RABGAP1L	8469.XP_007061229.1	Rab GTPase-activating protein 1-like	0	0	0	0	0	0	0	Infinity	0
CDT1	8469.XP_007059408.1	DNA replication factor Cdt1; The sequence of the model RefSeq protein was modified relative to its source genomic sequence to represent the inferred complete CDS: inserted 1 base in 1 codon	4.74948	0.000533973	0.210549	0.448718	13	12	25	0.92501	6508
ZRSR2	8469.XP_007070556.1	U2 small nuclear ribonucleoprotein auxiliary factor 35 kDa subunit-related protein 2	5.65073	0	0.176968	0	1	13	36	0.906985	0
SCAP	8469.XP_007066455.1	Sterol regulatory element-binding protein cleavage-activating protein	0	0	0	0	0	0	0	Infinity	0
OTOF	8469.XP_007072667.1	Otoferlin	0	0	0	0	0	0	0	Infinity	0
UY3_14828	8469.XP_007068054.1	Uncharacterized protein C14orf79 homolog	0	0	0	0	0	0	0	Infinity	0
DPH1	8469.XP_007057850.1	Diphthamide biosynthesis protein 1	5.658	0	0.176741	0	1	12	25	0.90684	0
MAP2	8469.XP_007071876.1	Microtubule-associated protein 2 isoform X1	1	0	1	0	1	1	1	1	0
SPAST	8469.XP_007058045.1	Spastin	1	1	1	0	2	1	1	1	2
DGUOK	8469.XP_007067504.1	Deoxyguanosine kinase	6.99896	0	0.142878	0	1	14	4	0.880021	0
SMIM11	8469.XP_007054674.1	Small integral membrane protein 11	0	0	0	0	0	0	0	Infinity	0
IGSF9	8469.XP_007066130.1	Protein turtle homolog A	0	0	0	0	0	0	0	Infinity	0
UY3_11564	8469.XP_007064695.1	Death-associated protein kinase 2-like	5.85343	0	0.17084	0	1	12	9	0.902931	0
TMTC1	8469.XP_007067542.1	Transmembrane and TPR repeat-containing protein 1	0	0	0	0	0	0	0	Infinity	0
STC1	8469.XP_007065556.1	Stanniocalcin-1	0	0	0	0	0	0	0	Infinity	0
MGST1	8469.XP_007072817.1	Microsomal glutathione S-transferase 1; The sequence of the model RefSeq protein was modified relative to its source genomic sequence to represent the inferred complete CDS: inserted 1 base in 1 codon; substituted 1 base at 1 genomic stop codon	1.33333	0	0.75	1	2	2	2.5	0.888889	0
SMIM1	8469.XP_007070285.1	Small integral membrane protein 1	1	0	1	0	1	1	1	1	0
INTU	8469.XP_007059210.1	PDZ domain-containing protein 6; Protein inturned	11.3669	0	0.0879744	1	2	19	3	0.792661	0
PDE1C	8469.XP_007064410.1	Phosphodiesterase; Calcium/calmodulin-dependent 3'	6.23181	0.0119881	0.160467	0.0357143	8	14	6.75	0.895364	360484
TMEM161A	8469.XP_007072208.1	Transmembrane protein 161A	0	0	0	0	0	0	0	Infinity	0
SMIM3	8469.XP_007071565.1	Small integral membrane protein 3	0	0	0	0	0	0	0	Infinity	0
HRASLS	8469.XP_007069084.1	HRAS like suppressor; Phospholipid-metabolizing enzyme A-C1	0	0	0	0	0	0	0	Infinity	0
AURKAIP1	8469.XP_007070252.1	Aurora kinase A-interacting protein	4.85759	0.0112586	0.205863	0.809524	15	13	21.8	0.922848	179688
FAM64A	8469.XP_007054244.1	Family with sequence similarity 64 member A; Protein FAM64A	4.98857	0	0.200458	1	4	12	30.5	0.920229	0
WDPCP	8469.XP_007062951.1	WD repeat-containing and planar cell polarity effector protein fritz homolog	10.369	0.00622835	0.0964411	0.166667	4	18	1.75	0.81262	72286
MALL	8469.XP_007063238.1	Mal	0	0	0	0	0	0	0	Infinity	0
RRAGC	8469.XP_007069082.1	Ras-related GTP-binding protein C	5.38981	0.0132844	0.185535	0.190476	7	11	5.14286	0.912204	79640
UY3_06647	8469.XP_007059441.1	KN motif and ankyrin repeat domain-containing protein 1-like	0	0	0	0	0	0	0	Infinity	0
DOPEY2	8469.XP_007068306.1	Protein dopey-2	0	0	0	0	0	0	0	Infinity	0
DOPEY1	8469.XP_007058922.1	Protein dopey-1 isoform X1	1	0	1	0	1	1	1	1	0
ACSL6	8469.XP_007053622.1	Long-chain-fatty-acid--CoA ligase 6; The sequence of the model RefSeq protein was modified relative to its source genomic sequence to represent the inferred complete CDS: deleted 2 bases in 1 codon	11.3004	0	0.0884923	0	1	19	2	0.793992	0
SLC6A13	8469.XP_007070856.1	Transporter; Sodium- and chloride-dependent GABA transporter 2 isoform X1; Belongs to the sodium:neurotransmitter symporter (SNF) (TC 2.A.22) family.	0	0	0	0	0	0	0	Infinity	0
SLC11A2	8469.XP_007067081.1	Natural resistance-associated macrophage protein 2	0	0	0	0	0	0	0	Infinity	0
MCCC1	8469.XP_007071056.1	methylcrotonoyl-CoA carboxylase subunit alpha	6.39813	0.00568354	0.156296	0	3	14	3.33333	0.892037	30766
AQR	8469.XP_007069455.1	Intron-binding protein aquarius	5.09563	0.00308835	0.196246	0.422222	10	13	14.7	0.918087	31572
JMJD4	8469.XP_007059535.1	jmjC domain-containing protein 4	1	0	1	0	1	1	1	1	0
XP_007063219.1	8469.XP_007063219.1	Uncharacterized protein LOC102940755	0	0	0	0	0	0	0	Infinity	0
TRMT44	8469.XP_007069753.1	Probable tRNA (uracil-O(2)-)-methyltransferase	1.5	0	0.666667	0	1	2	2	0.75	0
FAM65B	8469.XP_007060451.1	Family with sequence similarity 65 member B; The sequence of the model RefSeq protein was modified relative to its source genomic sequence to represent the inferred complete CDS: inserted 2 bases in 1 codon	0	0	0	0	0	0	0	Infinity	0
XP_007069710.1	8469.XP_007069710.1	Protein C10	0	0	0	0	0	0	0	Infinity	0
SAP130	8469.XP_007052645.1	Uncharacterized protein; Histone deacetylase complex subunit SAP130	6.19854	0	0.161328	0	1	12	9	0.896029	0
XP_007067714.1	8469.XP_007067714.1	Collagen alpha-2(I) chain-like	6.57173	0.004006	0.152167	0.428571	7	13	4.42857	0.888565	41156
CHEK2	8469.XP_007058417.1	Serine/threonine-protein kinase Chk2	4.54886	0.0126463	0.219835	0.32	26	11	18.5769	0.929023	119154
RUSC2	8469.XP_007055983.1	Iporin; The sequence of the model RefSeq protein was modified relative to its source genomic sequence to represent the inferred complete CDS: inserted 1 base in 1 codon	1	0	1	0	1	1	1	1	0
SOX1	8469.XP_007064019.1	SRY-box 1; Transcription factor SOX-1	0	0	0	0	0	0	0	Infinity	0
RS1	8469.XP_007070583.1	Retinoschisin	0	0	0	0	0	0	0	Infinity	0
UY3_13563	8469.XP_007066716.1	Uncharacterized protein C14orf28 homolog	0	0	0	0	0	0	0	Infinity	0
SOGA1	8469.XP_007053991.1	Suppressor of glucose	1	0	1	0	1	1	1	1	0
PWP1	8469.XP_007066213.1	Ankyrin repeat and BTB/POZ domain-containing protein BTBD11; Periodic tryptophan protein 1 homolog	4.56965	0.00402321	0.218835	0.601282	40	11	28.3	0.928607	83258
FAM203A	8469.XP_007068911.1	The sequence of the model RefSeq protein was modified relative to its source genomic sequence to represent the inferred complete CDS: deleted 1 base in 1 codon	5.05613	0	0.19778	1	7	11	41.1429	0.918877	0
GDE1	8469.XP_007064449.1	Glycerophosphodiester phosphodiesterase 1	1.71429	0.714286	0.583333	0	3	3	2	0.761905	30
DIXDC1	8469.XP_007060565.1	Dixin	6.94595	0.00465082	0.143969	0	2	13	3.5	0.881081	25682
UY3_18835	8469.XP_007072151.1	Cathepsin G-like; Belongs to the peptidase S1 family.	0	0	0	0	0	0	0	Infinity	0
TP53RK	8469.XP_007059894.1	TP53-regulating kinase	5.12578	0.002079	0.195092	0	2	11	16.5	0.917484	9050
UY3_11556	8469.XP_007064656.1	dnaJ homolog subfamily A member 1-like	0	0	0	0	0	0	0	Infinity	0
METAP2	8469.XP_007069288.1	Methionine aminopeptidase 2	1	1	1	0	2	1	1	1	2
MMACHC	8469.XP_007061734.1	Methylmalonic aciduria and homocystinuria type C protein homolog	8.28067	0	0.120763	0	1	16	3	0.854387	0
UY3_07626	8469.XP_007060449.1	Uncharacterized protein C6orf62 homolog	0	0	0	0	0	0	0	Infinity	0
UY3_10794	8469.XP_007063899.1	Uncharacterized protein C17orf105 homolog	0	0	0	0	0	0	0	Infinity	0
CDO1	8469.XP_007055468.1	Cysteine dioxygenase type 1; Derived by automated computational analysis using gene prediction method: Gnomon. Supporting evidence includes similarity to: 21 Proteins	0	0	0	0	0	0	0	Infinity	0
CBLN4	8469.XP_007059822.1	Cerebellin-4; Derived by automated computational analysis using gene prediction method: Gnomon. Supporting evidence includes similarity to: 1 mRNA	2	0	0.5	0	1	3	2	0.5	0
RHEBL1	8469.XP_007064799.1	GTPase RhebL1	1	0	1	0	1	1	1	1	0
UY3_11573	8469.XP_007064701.1	The sequence of the model RefSeq protein was modified relative to its source genomic sequence to represent the inferred complete CDS: substituted 1 base at 1 genomic stop codon	0	0	0	0	0	0	0	Infinity	0
RUNDC1	8469.XP_007054807.1	RUN domain-containing protein 1	0	0	0	0	0	0	0	Infinity	0
UY3_05900	8469.XP_007058663.1	Transcription factor E4F1-like	0	0	0	0	0	0	0	Infinity	0
CROCC	8469.XP_007072729.1	Rootletin; The sequence of the model RefSeq protein was modified relative to its source genomic sequence to represent the inferred complete CDS: substituted 1 base at 1 genomic stop codon	1	0.666667	1	0.333333	3	1	1.66667	1	4
MGAT4A	8469.XP_007069042.1	Alpha-1	0	0	0	0	0	0	0	Infinity	0
RAD51	8469.XP_007069443.1	DNA repair protein RAD51 homolog 1	4.26819	0.0277961	0.234291	0.253788	33	11	18.3333	0.934636	253296
NFASC	8469.XP_007065173.1	Neurofascin isoform X1	3.33333	0	0.3	1	2	5	2.5	0.222222	0
UY3_16440	8469.XP_007069712.1	Membrane protein FAM174-like	0	0	0	0	0	0	0	Infinity	0
PNRC2	8469.XP_007068094.1	Proline-rich nuclear receptor coactivator 2	0	0	0	0	0	0	0	Infinity	0
TRIT1	8469.XP_007067680.1	tRNA isopentenyltransferase 1; tRNA dimethylallyltransferase	5.74844	0	0.17396	0	1	12	18	0.905031	0
KLF2	8469.XP_007072085.1	Krueppel-like factor 2	0	0	0	0	0	0	0	Infinity	0
OXR1	8469.XP_007056156.1	Oxidation resistance protein 1-like	0	0	0	0	0	0	0	Infinity	0
CDC42BPA	8469.XP_007071759.1	Serine/threonine-protein kinase MRCK alpha isoform X1	0	0	0	0	0	0	0	Infinity	0
DDHD2	8469.XP_007053517.1	Phospholipase DDHD2 isoform X1	0	0	0	0	0	0	0	Infinity	0
AHNAK2	8469.XP_007068081.1	Protein AHNAK2	0	0	0	0	0	0	0	Infinity	0
KCNJ13	8469.XP_007052659.1	Inward rectifier potassium channel 13	0	0	0	0	0	0	0	Infinity	0
RNF25	8469.XP_007060492.1	E3 ubiquitin-protein ligase RNF25	0	0	0	0	0	0	0	Infinity	0
KCNIP2	8469.XP_007070520.1	Kv channel-interacting protein 2	6.70062	0.00415584	0.14924	0	3	14	1.66667	0.885988	30206
KCNJ11	8469.XP_007057187.1	ATP-sensitive inward rectifier potassium channel 11	0	0	0	0	0	0	0	Infinity	0
KCNJ10	8469.XP_007066102.1	ATP-sensitive inward rectifier potassium channel 10; Derived by automated computational analysis using gene prediction method: Gnomon. Supporting evidence includes similarity to: 1 EST	1	0	1	0	1	1	1	1	0
WASF3	8469.XP_007060232.1	wiskott-Aldrich syndrome protein family member 3-like	6.85863	0.00103734	0.145802	0.666667	3	14	4.66667	0.882827	14194
DCAF12	8469.XP_007063376.1	DDB1- and CUL4-associated factor 12	0	0	0	0	0	0	0	Infinity	0
FNIP1	8469.XP_007053623.1	Folliculin-interacting protein 1; The sequence of the model RefSeq protein was modified relative to its source genomic sequence to represent the inferred complete CDS: inserted 1 base in 1 codon	6.38669	0.002079	0.156576	0	2	12	4	0.892266	10760
NHS	8469.XP_007070585.1	Nance-Horan syndrome protein; The sequence of the model RefSeq protein was modified relative to its source genomic sequence to represent the inferred complete CDS: substituted 1 base at 1 genomic stop codon	0	0	0	0	0	0	0	Infinity	0
UY3_17166	8469.XP_007070490.1	Sperm acrosome membrane-associated protein 4-like	0	0	0	0	0	0	0	Infinity	0
XP_007053101.1	8469.XP_007053101.1	Derived by automated computational analysis using gene prediction method: Gnomon. Supporting evidence includes similarity to: 1 mRNA	4.33784	0.0532693	0.23053	0.410526	20	11	19.65	0.933243	486786
CHADL	8469.XP_007053374.1	Chondroadherin-like protein	0	0	0	0	0	0	0	Infinity	0
RBBP4	8469.XP_007067673.1	Histone-binding protein RBBP4	5.22349	0.00438117	0.191443	0.0952381	7	12	9	0.91553	29748
PUF60	8469.XP_007061483.1	poly(U)-binding-splicing factor PUF60	5.52183	0.000137007	0.181099	0.333333	3	13	19.3333	0.909563	1272
MRM1	8469.XP_007057679.1	Mitochondrial rRNA methyltransferase 1; Derived by automated computational analysis using gene prediction method: Gnomon. Supporting evidence includes similarity to: 5 Proteins	1	1	1	0	2	1	1	1	2
SEMA3E	8469.XP_007060985.1	Semaphorin 3E; Derived by automated computational analysis using gene prediction method: Gnomon. Supporting evidence includes similarity to: 3 mRNAs	1	0	1	0	1	1	1	1	0
UY3_00924	8469.XP_007053414.1	Interferon-inducible GTPase 5-like	0	0	0	0	0	0	0	Infinity	0
LUZP2	8469.XP_007067984.1	Leucine zipper protein 2 isoform X1	0	0	0	0	0	0	0	Infinity	0
ACSS3	8469.XP_007059093.1	acyl-CoA synthetase short-chain family member 3	6.35759	0	0.157292	1	3	14	7	0.892848	0
SSX2IP	8469.XP_007068795.1	SSX family member 2 interacting protein; Afadin- and alpha-actinin-binding protein	6.80561	0.0115192	0.146938	0.6	5	13	5.8	0.883888	74604
SMPDL3B	8469.XP_007066148.1	Acid sphingomyelinase-like phosphodiesterase 3b	0	0	0	0	0	0	0	Infinity	0
EFHC2	8469.XP_007064503.1	EF-hand domain-containing family member C2	8.65696	0	0.115514	0	1	15	8	0.846861	0
UY3_13096	8469.XP_007066273.1	Bile acid receptor-like	0	0	0	0	0	0	0	Infinity	0
EFHC1	8469.XP_007061799.1	EF-hand domain-containing protein 1	8.65696	0	0.115514	0	1	15	8	0.846861	0
TNMD	8469.XP_007063973.1	Tenomodulin	0	0	0	0	0	0	0	Infinity	0
ASPH	8469.XP_007059520.1	Aspartyl/asparaginyl beta-hydroxylase	0	0	0	0	0	0	0	Infinity	0
ETV3L	8469.XP_007064700.1	ETS variant 3 like; The sequence of the model RefSeq protein was modified relative to its source genomic sequence to represent the inferred complete CDS: substituted 1 base at 1 genomic stop codon	0	0	0	0	0	0	0	Infinity	0
WRAP73	8469.XP_007070220.1	WD repeat-containing protein WRAP73	7.47713	0	0.133741	0	1	15	6	0.870457	0
ASPM	8469.XP_007063727.1	Abnormal spindle-like microcephaly-associated protein homolog	4.70166	0.036316	0.212691	0.363077	26	12	16.9615	0.925967	439240
UY3_01613	8469.XP_007054164.1	Cellular tumor antigen p53; Acts as a tumor suppressor in many tumor types; induces growth arrest or apoptosis depending on the physiological circumstances and cell type. Involved in cell cycle regulation as a trans-activator that acts to negatively regulate cell division by controlling a set of genes required for this process. One of the activated genes is an inhibitor of cyclin-dependent kinase…	4.1289	0.201701	0.242195	0.0987903	32	10	13.2188	0.937422	1088030
UY3_18730	8469.XP_007072105.1	semaphorin-4E-like	0	0	0	0	0	0	0	Infinity	0
LCA5L	8469.XP_007064527.1	LCA5L	0	0	0	0	0	0	0	Infinity	0
ADRA2A	8469.XP_007055622.1	alpha-2A adrenergic receptor	0	0	0	0	0	0	0	Infinity	0
PTBP2	8469.XP_007070353.1	Polypyrimidine tract-binding protein 2	6.35655	0	0.157318	0	1	14	15	0.892869	0
ADRA2B	8469.XP_007067510.1	alpha-2B adrenergic receptor	0	0	0	0	0	0	0	Infinity	0
REXO2	8469.XP_007060528.1	RNA exonuclease 2; Oligoribonuclease	1	0	1	1	2	1	2	1	0
TRAF2	8469.XP_007067720.1	TNF receptor-associated factor 2	5.78586	0.0324314	0.172835	0.0357143	8	12	2.5	0.904283	169636
SORD	8469.XP_007071610.1	Sorbitol dehydrogenase	6.74532	0	0.148251	0	1	14	7	0.885094	0
UY3_05086	8469.XP_007057753.1	Adenine phosphoribosyltransferase 1-like	5.86694	4.84639e-05	0.170446	0	2	13	14	0.902661	322
XP_007065381.1	8469.XP_007065381.1	TALPID3 protein-like	0	0	0	0	0	0	0	Infinity	0
REXO1	8469.XP_007068634.1	RNA exonuclease 1 homolog	1	0	1	1	2	1	2	1	0
GPX2	8469.XP_007068503.1	Glutathione peroxidase 2; The sequence of the model RefSeq protein was modified relative to its source genomic sequence to represent the inferred complete CDS: substituted 1 base at 1 genomic stop codon	1.33333	0	0.75	1	2	2	2.5	0.888889	0
IQCB1	8469.XP_007071950.1	IQ calmodulin-binding motif-containing protein 1 isoform X1	7.98129	0	0.125293	0	1	14	6	0.860374	0
UY3_09581	8469.XP_007062558.1	Uncharacterized protein; Derived by automated computational analysis using gene prediction method: Gnomon. Supporting evidence includes similarity to: 2 Proteins	0	0	0	0	0	0	0	Infinity	0
GRASP	8469.XP_007064785.1	General receptor for phosphoinositides 1-associated scaffold protein	1	0	1	0	1	1	1	1	0
ZNF521	8469.XP_007057076.1	Zinc finger protein 521	0	0	0	0	0	0	0	Infinity	0
XP_007053843.1	8469.XP_007053843.1	Zinc finger protein 250-like	0	0	0	0	0	0	0	Infinity	0
PDDC1	8469.XP_007060968.1	Parkinson disease 7 domain-containing protein 1	7.41372	0	0.134885	0	1	15	3	0.871726	0
DNMT3B	8469.XP_007062590.1	DNA (cytosine-5)-methyltransferase 3B; Belongs to the class I-like SAM-binding methyltransferase superfamily. C5-methyltransferase family.	5.63929	0.002079	0.177327	0.5	4	12	5.5	0.907214	8380
CARM1	8469.XP_007055943.1	Histone-arginine methyltransferase CARM1; Belongs to the class I-like SAM-binding methyltransferase superfamily. Protein arginine N- methyltransferase family.	5.87942	0	0.170085	0	1	13	8	0.902412	0
PSD3	8469.XP_007057973.1	PH and SEC7 domain-containing protein 3-like	0	0	0	0	0	0	0	Infinity	0
PSD4	8469.XP_007069934.1	Pleckstrin and Sec7 domain containing 4; The sequence of the model RefSeq protein was modified relative to its source genomic sequence to represent the inferred complete CDS: deleted 2 bases in 1 codon	0	0	0	0	0	0	0	Infinity	0
SART3	8469.XP_007058444.1	Squamous cell carcinoma antigen recognized by T-cells 3	5.0447	0	0.198228	1	7	12	22	0.919106	0
XP_007061818.1	8469.XP_007061818.1	Uncharacterized protein LOC102936721	0	0	0	0	0	0	0	Infinity	0
PPP6C	8469.XP_007061009.1	Serine/threonine-protein phosphatase 6 catalytic subunit isoform X1	5.4605	0.0027995	0.183133	0	3	12	3.33333	0.91079	13072
UY3_09533	8469.XP_007062528.1	Period circadian protein homolog 2-like	6.34304	0.00415151	0.157653	0.333333	4	13	2.75	0.893139	30390
METTL12	8469.XP_007056938.1	Methyltransferase-like protein 12	0	0	0	0	0	0	0	Infinity	0
DNALI1	8469.XP_007060801.1	Axonemal dynein light intermediate polypeptide 1	6.99064	0.00622403	0.143048	0	2	13	6	0.880187	29952
MAIP1	8469.XP_007072009.1	Matrix AAA peptidase interacting protein 1; Uncharacterized protein C2orf47 homolog	0	0	0	0	0	0	0	Infinity	0
NAGPA	8469.XP_007069366.1	N-acetylglucosamine-1-phosphodiester alpha-N-acetylglucosaminidase	5.48857	0	0.182197	0	1	12	37	0.910229	0
LSP1	8469.XP_007063030.1	Lymphocyte-specific protein 1	0	0	0	0	0	0	0	Infinity	0
DAGLA	8469.XP_007065833.1	Sn1-specific diacylglycerol lipase alpha	0	0	0	0	0	0	0	Infinity	0
ZNF532	8469.XP_007069483.1	Zinc finger protein 532	0	0	0	0	0	0	0	Infinity	0
SERINC2	8469.XP_007066156.1	Serine incorporator 2	0	0	0	0	0	0	0	Infinity	0
LZTR1	8469.XP_007057959.1	Leucine-zipper-like transcriptional regulator 1-like isoform X1	0	0	0	0	0	0	0	Infinity	0
ESAM	8469.XP_007066448.1	Endothelial cell-selective adhesion molecule	1	1	1	0	2	1	1	1	2
UY3_07293	8469.XP_007060129.1	Voltage-dependent T-type calcium channel subunit alpha-1H-like	1	0	1	0	1	1	1	1	0
ZNF536	8469.XP_007058718.1	Zinc finger protein 536	0	0	0	0	0	0	0	Infinity	0
CDK1	8469.XP_007054897.1	Cyclin-dependent kinase 1; Belongs to the protein kinase superfamily.	4.12682	0.0910448	0.242317	0.183511	48	11	14.5417	0.937464	682178
ITGA11	8469.XP_007059564.1	Integrin alpha-11	2.4	0	0.416667	0	1	4	3	0.533333	0
CDK2	8469.XP_007064985.1	Cyclin-dependent kinase 2; The sequence of the model RefSeq protein was modified relative to its source genomic sequence to represent the inferred complete CDS: inserted 1 base in 1 codon	4.5499	0.00412138	0.219785	0.371429	15	11	19.6667	0.929002	40400
ZFP64	8469.XP_007059815.1	Zinc finger protein 64 homolog	0	0	0	0	0	0	0	Infinity	0
CNOT1	8469.XP_007068547.1	CCR4-NOT transcription complex subunit 1	5.22765	0.01134	0.191291	0.214286	8	13	6.25	0.915447	86448
CDK4	8469.XP_007067085.1	Cyclin-dependent kinase 4	4.70478	0.0023743	0.21255	0.25	9	11	16.5556	0.925904	16558
GON4L	8469.XP_007068150.1	GON-4-like protein	1	0	1	0	1	1	1	1	0
LSM6	8469.XP_007055771.1	U6 snRNA-associated Sm-like protein LSm6	4.84096	0.000491932	0.206571	0.720588	17	12	18.8824	0.923181	9784
CNOT6	8469.XP_007071580.1	CCR4-NOT transcription complex subunit 6	5.3264	0.00181354	0.187744	0.666667	4	13	8	0.913472	33100
XP_007066464.1	8469.XP_007066464.1	Uncharacterized protein LOC102935403	0	0	0	0	0	0	0	Infinity	0
LSM8	8469.XP_007053174.1	N-alpha-acetyltransferase 38	4.83888	0.000437795	0.20666	0.757353	17	12	19.1176	0.923222	9062
CNOT4	8469.XP_007069342.1	CCR4-NOT transcription complex subunit 4 isoform X1	5.21102	0.00378702	0.191901	0.2	6	13	5.66667	0.91578	17596
MOB1B	8469.XP_007065972.1	Mps one binder kinase activator-like 1B; MOB kinase activator 1B	1.5	0	0.666667	0	1	2	2	0.75	0
2020-03-03	8469.XP_007060915.1	E3 ubiquitin-protein ligase MARCH3	1	0	1	0	1	1	1	1	0
LSM3	8469.XP_007060016.1	U6 snRNA-associated Sm-like protein LSm3	4.59356	0.0133775	0.217696	0.614035	19	12	18.4211	0.928129	170734
PALB2	8469.XP_007058672.1	Acyl carrier protein; Carrier of the growing fatty acid chain in fatty acid biosynthesis.	5.10811	6.9976e-05	0.195767	0.809524	7	12	21	0.917838	1558
LSM4	8469.XP_007072097.1	U6 snRNA-associated Sm-like protein LSm4	4.59459	0.012834	0.217647	0.647059	18	12	18.3889	0.928108	162638
ESRRG	8469.XP_007064809.1	Estrogen-related receptor gamma	0	0	0	0	0	0	0	Infinity	0
NEB	8469.XP_007056748.1	Nebulin; The sequence of the model RefSeq protein was modified relative to its source genomic sequence to represent the inferred complete CDS: substituted 1 base at 1 genomic stop codon	0	0	0	0	0	0	0	Infinity	0
2020-03-08	8469.XP_007069182.1	Cytochrome P450 2H2; E3 ubiquitin-protein ligase MARCH8 isoform X1	0	0	0	0	0	0	0	Infinity	0
UY3_06441	8469.XP_007059214.1	Uncharacterized protein C4orf29 homolog	0	0	0	0	0	0	0	Infinity	0
2020-03-09	8469.XP_007067092.1	E3 ubiquitin-protein ligase MARCH9	0	0	0	0	0	0	0	Infinity	0
TNK2	8469.XP_007057901.1	Activated CDC42 kinase 1; Belongs to the protein kinase superfamily. Tyr protein kinase family.	6.86279	0	0.145713	0	1	14	7	0.882744	0
GPR108	8469.XP_007070106.1	Protein GPR108	0	0	0	0	0	0	0	Infinity	0
ANKRD24	8469.XP_007072292.1	Ankyrin repeat domain-containing protein 24	0	0	0	0	0	0	0	Infinity	0
CD164	8469.XP_007057513.1	CD164 molecule; Sialomucin core protein 24	0	0	0	0	0	0	0	Infinity	0
ESRRA	8469.XP_007070445.1	Steroid hormone receptor ERR1	0	0	0	0	0	0	0	Infinity	0
ZNF541	8469.XP_007067384.1	Alpha-soluble NSF attachment protein; The sequence of the model RefSeq protein was modified relative to its source genomic sequence to represent the inferred complete CDS: deleted 3 bases in 2 codons; substituted 1 base at 1 genomic stop codon	0	0	0	0	0	0	0	Infinity	0
KIAA0319	8469.XP_007060447.1	Dyslexia-associated protein KIAA0319 homolog	0	0	0	0	0	0	0	Infinity	0
ANKRD10	8469.XP_007063966.1	Ankyrin repeat domain-containing protein 10; Derived by automated computational analysis using gene prediction method: Gnomon. Supporting evidence includes similarity to: 13 Proteins	7.2817	0.002079	0.13733	0.333333	3	15	3	0.874366	23376
ESD	8469.XP_007058815.1	S-formylglutathione hydrolase; Serine hydrolase involved in the detoxification of formaldehyde.	8.31809	0.002079	0.12022	0.333333	3	16	4.33333	0.853638	13540
XP_007064014.1	8469.XP_007064014.1	Centrin-2-like	6.62266	0	0.150997	1	2	13	4.5	0.887547	0
OARD1	8469.XP_007063572.1	Uncharacterized protein; O-acetyl-ADP-ribose deacetylase 1	1	0	1	0	1	1	1	1	0
MUSTN1	8469.XP_007055658.1	Musculoskeletal embryonic nuclear protein 1	0	0	0	0	0	0	0	Infinity	0
BAG4	8469.XP_007053532.1	BAG family molecular chaperone regulator 4; The sequence of the model RefSeq protein was modified relative to its source genomic sequence to represent the inferred complete CDS: substituted 1 base at 1 genomic stop codon	0	0	0	0	0	0	0	Infinity	0
STIP1	8469.XP_007070378.1	Stress-induced-phosphoprotein 1 isoform X1	4.76403	0.0105891	0.209906	0.214286	8	12	7	0.924719	61070
AK9	8469.XP_007057515.1	Adenylate kinase 9	5.28898	0.0195456	0.189072	0.392857	8	12	9.375	0.91422	337924
GLB1L2	8469.XP_007067032.1	Beta-galactosidase-1-like protein 2; Belongs to the glycosyl hydrolase 35 family.	6.39189	0	0.156448	0	1	14	3	0.892162	0
PHF21B	8469.XP_007061807.1	PHD finger protein 21B	0	0	0	0	0	0	0	Infinity	0
AK8	8469.XP_007061097.1	Adenylate kinase 8; Derived by automated computational analysis using gene prediction method: Gnomon. Supporting evidence includes similarity to: 3 mRNAs	5.98025	0.000499549	0.167217	0.666667	4	13	10.5	0.900395	8024
PHF21A	8469.XP_007070903.1	PHD finger protein 21A	0	0	0	0	0	0	0	Infinity	0
AK7	8469.XP_007065027.1	Adenylate kinase 7; The sequence of the model RefSeq protein was modified relative to its source genomic sequence to represent the inferred complete CDS: substituted 1 base at 1 genomic stop codon	5.98025	0.000499549	0.167217	0.666667	4	13	10.5	0.900395	8024
TARS	8469.XP_007069499.1	Threonyl-tRNA synthetase	5.38981	0.00484764	0.185535	0.5	4	13	10.75	0.912204	43674
MRI1	8469.XP_007066406.1	Methylthioribose-1-phosphate isomerase 1; The sequence of the model RefSeq protein was modified relative to its source genomic sequence to represent the inferred complete CDS: inserted 2 bases in 1 codon	5.30457	0.00331235	0.188517	0	3	13	5.66667	0.913909	23408
ILDR1	8469.XP_007062151.1	Immunoglobulin-like domain-containing receptor 1-like	0	0	0	0	0	0	0	Infinity	0
ABHD8	8469.XP_007072114.1	Abhydrolase domain-containing protein 8; Derived by automated computational analysis using gene prediction method: Gnomon. Supporting evidence includes similarity to: 1 mRNA	0	0	0	0	0	0	0	Infinity	0
ANKRD12	8469.XP_007062390.1	Ankyrin repeat domain-containing protein 12 isoform X1	0	0	0	0	0	0	0	Infinity	0
HVCN1	8469.XP_007058370.1	Voltage-gated hydrogen channel 1	0	0	0	0	0	0	0	Infinity	0
ABHD2	8469.XP_007060414.1	Abhydrolase domain-containing protein 2	0	0	0	0	0	0	0	Infinity	0
ABHD3	8469.XP_007057065.1	Abhydrolase domain-containing protein 3	0	0	0	0	0	0	0	Infinity	0
DNMT1	8469.XP_007071285.1	Eukaryotic translation initiation factor 3 RNA-binding subunit; RNA-binding component of the eukaryotic translation initiation factor 3 (eIF-3) complex	4.6632	0.0336698	0.214445	0.0909091	12	11	12.5	0.926736	152868
IQCA1	8469.XP_007058184.1	IQ and AAA domain-containing protein 1	1	0	1	0	1	1	1	1	0
CSF1R	8469.XP_007071554.1	Macrophage colony-stimulating factor 1 receptor; Belongs to the protein kinase superfamily. Tyr protein kinase family.	8.09979	0.00622547	0.12346	0	3	15	3	0.858004	39502
DGKH	8469.XP_007061377.1	Diacylglycerol kinase; Derived by automated computational analysis using gene prediction method: Gnomon. Supporting evidence includes similarity to: 3 mRNAs	6.13098	0	0.163106	0	1	14	5	0.89738	0
TTPAL	8469.XP_007067354.1	Alpha tocopherol transfer protein like; Derived by automated computational analysis using gene prediction method: Gnomon. Supporting evidence includes similarity to: 1 EST	0	0	0	0	0	0	0	Infinity	0
MADD	8469.XP_007054344.1	MAP kinase-activating death domain protein; Derived by automated computational analysis using gene prediction method: Gnomon. Supporting evidence includes similarity to: 1 mRNA	1	0	1	0	1	1	1	1	0
GPATCH11	8469.XP_007058003.1	G patch domain-containing protein 11	0	0	0	0	0	0	0	Infinity	0
PTCHD2	8469.XP_007053798.1	Dispatched RND transporter family member 3; Patched domain-containing protein 2	6.57484	0	0.152095	0	1	14	3	0.888503	0
ST7L	8469.XP_007059650.1	Suppressor of tumorigenicity 7 protein-like protein; Derived by automated computational analysis using gene prediction method: Gnomon. Supporting evidence includes similarity to: 1 mRNA	0	0	0	0	0	0	0	Infinity	0
BSCL2	8469.XP_007056941.1	BSCL2	0	0	0	0	0	0	0	Infinity	0
GTF2F1	8469.XP_007066402.1	General transcription factor IIF subunit 1	4.9948	0.001405	0.200208	0.577778	10	12	8.8	0.920104	9962
MITF	8469.XP_007061546.1	Microphthalmia-associated transcription factor; The sequence of the model RefSeq protein was modified relative to its source genomic sequence to represent the inferred complete CDS: substituted 1 base at 1 genomic stop codon	0	0	0	0	0	0	0	Infinity	0
SEMA6D	8469.XP_007066851.1	semaphorin-6D isoform X1; Belongs to the semaphorin family.	1	0	1	0	1	1	1	1	0
ANKRD44	8469.XP_007071938.1	Serine/threonine-protein phosphatase 6 regulatory ankyrin repeat subunit B isoform X1	0	0	0	0	0	0	0	Infinity	0
NKX6-3	8469.XP_007064258.1	Homeobox protein Nkx-6.3	0	0	0	0	0	0	0	Infinity	0
TOR3A	8469.XP_007061286.1	torsin-3A	7.18503	0.00227284	0.139178	0	2	15	2.5	0.876299	20986
PNISR	8469.XP_007067221.1	Ubiquitinyl hydrolase 1; Arginine/serine-rich protein PNISR isoform X1	5.29626	0.001627	0.188813	0.333333	6	13	10.5	0.914075	12554
TPD52	8469.XP_007053027.1	Tumor protein D52	0	0	0	0	0	0	0	Infinity	0
UY3_12427	8469.XP_007065614.1	Uncharacterized protein C9orf40 homolog	0	0	0	0	0	0	0	Infinity	0
GRB10	8469.XP_007061395.1	Growth factor receptor-bound protein 10 isoform X1	0	0	0	0	0	0	0	Infinity	0
MACROD1	8469.XP_007070452.1	O-acetyl-ADP-ribose deacetylase MACROD1	1	0	1	0	1	1	1	1	0
GRB14	8469.XP_007056699.1	Growth factor receptor-bound protein 14	0	0	0	0	0	0	0	Infinity	0
UY3_18706	8469.XP_007072188.1	Uncharacterized protein C19orf45 homolog	0	0	0	0	0	0	0	Infinity	0
XP_007068755.1	8469.XP_007068755.1	dnaJ homolog subfamily B member 2-like	0	0	0	0	0	0	0	Infinity	0
ZUFSP	8469.XP_007056825.1	Zinc finger with UFM1-specific peptidase domain protein	0	0	0	0	0	0	0	Infinity	0
XP_007059575.1	8469.XP_007059575.1	MIP18 family protein FAM96A-like	0	0	0	0	0	0	0	Infinity	0
XP_007069867.1	8469.XP_007069867.1	Uncharacterized protein LOC102934587	5.70582	0.00827346	0.17526	0	3	13	8.33333	0.905884	61524
BEST1	8469.XP_007063938.1	Bestrophin-1	0	0	0	0	0	0	0	Infinity	0
FAM107A	8469.XP_007066003.1	Protein FAM107A	0	0	0	0	0	0	0	Infinity	0
ITGA2B	8469.XP_007053896.1	Integrin alpha-IIb	0	0	0	0	0	0	0	Infinity	0
DGKA	8469.XP_007064984.1	Diacylglycerol kinase alpha	6.13098	0	0.163106	0	1	14	5	0.89738	0
TOR2A	8469.XP_007057391.1	torsin-2A	0	0	0	0	0	0	0	Infinity	0
SEMA5B	8469.XP_007071948.1	semaphorin-5B	0	0	0	0	0	0	0	Infinity	0
CHRM2	8469.XP_007072366.1	Muscarinic acetylcholine receptor; The muscarinic acetylcholine receptor mediates various cellular responses	0	0	0	0	0	0	0	Infinity	0
SLC28A2	8469.XP_007065905.1	Solute carrier family 28 member 2; Sodium/nucleoside cotransporter 2	0	0	0	0	0	0	0	Infinity	0
PLCD3	8469.XP_007053904.1	Phosphoinositide phospholipase C; 1-phosphatidylinositol 4	5.13202	0.00681145	0.194855	0	5	13	9	0.91736	69362
LAMTOR2	8469.XP_007064650.1	Ragulator complex protein LAMTOR2 isoform X1	5.42723	0.0157294	0.184256	0.5	4	11	6.5	0.911455	88260
HYLS1	8469.XP_007066432.1	Hydrolethalus syndrome protein 1	6.57277	0	0.152143	0	1	14	6	0.888545	0
XP_007062077.1	8469.XP_007062077.1	Neurexophilin-1-like	0	0	0	0	0	0	0	Infinity	0
ABI1	8469.XP_007058547.1	Abl interactor 1 isoform X1	7.85447	1.08169e-06	0.127316	0.666667	3	15	3	0.862911	2
AGBL3	8469.XP_007072754.1	ATP/GTP binding protein like 3; The sequence of the model RefSeq protein was modified relative to its source genomic sequence to represent the inferred complete CDS: inserted 1 base in 1 codon	0	0	0	0	0	0	0	Infinity	0
MORN2	8469.XP_007063229.1	MORN repeat-containing protein 2	0	0	0	0	0	0	0	Infinity	0
LPCAT4	8469.XP_007069779.1	Lysophospholipid acyltransferase LPCAT4	4.57895	0.105263	0.218391	0	2	7	1.5	0.105263	36
TMEM159	8469.XP_007064422.1	Promethin	0	0	0	0	0	0	0	Infinity	0
NMNAT1	8469.XP_007053780.1	Nicotinamide mononucleotide adenylyltransferase 1 isoform X1	0	0	0	0	0	0	0	Infinity	0
UY3_13377	8469.XP_007066519.1	Rap1 GTPase-activating protein 1-like	0	0	0	0	0	0	0	Infinity	0
AGBL4	8469.XP_007062212.1	Cytosolic carboxypeptidase 6	1.5	0.5	0.666667	0	2	2	2	0.833333	6
AGBL5	8469.XP_007062876.1	Cytosolic carboxypeptidase-like protein 5; The sequence of the model RefSeq protein was modified relative to its source genomic sequence to represent the inferred complete CDS: deleted 3 bases in 2 codons	7.41372	0	0.134885	0	1	15	3	0.871726	0
FMO5	8469.XP_007061263.1	Dimethylaniline monooxygenase [N-oxide-forming] 5-like; Belongs to the FMO family.	0	0	0	0	0	0	0	Infinity	0
GTF2H3	8469.XP_007058424.1	General transcription factor IIH subunit 3; The sequence of the model RefSeq protein was modified relative to its source genomic sequence to represent the inferred complete CDS: inserted 1 base in 1 codon; substituted 2 bases at 2 genomic stop codons	5.06757	0	0.197333	1	7	12	10.7143	0.918649	0
UY3_07384	8469.XP_007060295.1	Phosphatidylinositol-binding clathrin assembly protein-like	0	0	0	0	0	0	0	Infinity	0
GTF2H2	8469.XP_007059291.1	General transcription factor IIH subunit 2	5.06757	0	0.197333	1	7	12	10.7143	0.918649	0
TTC9C	8469.XP_007056943.1	Tetratricopeptide repeat protein 9C	0	0	0	0	0	0	0	Infinity	0
SRP68	8469.XP_007072603.1	Signal recognition particle subunit SRP68; Signal-recognition-particle assembly has a crucial role in targeting secretory proteins to the rough endoplasmic reticulum membrane.	4.95634	0.000127885	0.201762	0.75	8	12	27.625	0.920873	3700
TRMT1	8469.XP_007058275.1	tRNA (guanine(26)-N(2))-dimethyltransferase; The sequence of the model RefSeq protein was modified relative to its source genomic sequence to represent the inferred complete CDS: substituted 1 base at 1 genomic stop codon	4.74948	0.002079	0.210549	0.888889	18	11	36.8333	0.92501	14488
AGL	8469.XP_007062666.1	Glycogen debranching enzyme	6.99064	0.00622403	0.143048	0.333333	3	14	3.66667	0.880187	35580
F10	8469.XP_007064017.1	Coagulation factor X	0	0	0	0	0	0	0	Infinity	0
SF3A3	8469.XP_007060798.1	Splicing factor 3a subunit 3; The sequence of the model RefSeq protein was modified relative to its source genomic sequence to represent the inferred complete CDS: substituted 1 base at 1 genomic stop codon	4.7079	0.00333375	0.212409	0.5	16	12	20.25	0.925842	33960
DTD2	8469.XP_007063754.1	Probable D-tyrosyl-tRNA(Tyr) deacylase 2	0	0	0	0	0	0	0	Infinity	0
SF3B1	8469.XP_007072015.1	Splicing factor 3B subunit 1	4.65177	0.0386462	0.214972	0.209524	36	12	12.7778	0.926965	303718
GPR156	8469.XP_007062130.1	Probable G-protein coupled receptor 156	0	0	0	0	0	0	0	Infinity	0
GPR153	8469.XP_007070209.1	Probable G-protein coupled receptor 153	0	0	0	0	0	0	0	Infinity	0
GPR151	8469.XP_007054431.1	Probable G-protein coupled receptor 151	0	0	0	0	0	0	0	Infinity	0
GPR152	8469.XP_007055935.1	Probable G-protein coupled receptor 152	0	0	0	0	0	0	0	Infinity	0
ATP6AP1L	8469.XP_007066497.1	V-type proton ATPase subunit S1-like protein; Derived by automated computational analysis using gene prediction method: Gnomon. Supporting evidence includes similarity to: 1 mRNA	1	0	1	0	1	1	1	1	0
SSFA2	8469.XP_007069827.1	Sperm-specific antigen 2	2.4	0	0.416667	0	1	3	2	0.65	0
XP_007061160.1	8469.XP_007061160.1	Centrosome-associated protein 350-like	0	0	0	0	0	0	0	Infinity	0
UY3_09660	8469.XP_007062661.1	Lipid phosphate phosphatase-related protein type 5; Derived by automated computational analysis using gene prediction method: Gnomon. Supporting evidence includes similarity to: 12 Proteins	0	0	0	0	0	0	0	Infinity	0
XP_007071833.1	8469.XP_007071833.1	Neuroblast differentiation-associated protein AHNAK-like	0	0	0	0	0	0	0	Infinity	0
UY3_12964	8469.XP_007066173.1	Lipid phosphate phosphatase-related protein type 1-like	0	0	0	0	0	0	0	Infinity	0
ASAH1	8469.XP_007062753.1	N-acylsphingosine amidohydrolase 1; Acid ceramidase	1.5	0	0.666667	0	1	2	2	0.75	0
UY3_16193	8469.XP_007069442.1	Uncharacterized protein C15orf57 homolog	0	0	0	0	0	0	0	Infinity	0
ENG	8469.XP_007057348.1	Adenylate monophosphate kinase; Catalyzes the reversible transfer of the terminal phosphate group between ATP and AMP. Also displays broad nucleoside diphosphate kinase activity. Plays an important role in cellular energy homeostasis and in adenine nucleotide metabolism; Belongs to the adenylate kinase family. AK1 subfamily.	6.28898	0.00415584	0.159008	0	3	13	2	0.89422	17290
PLCB1	8469.XP_007064205.1	Phosphoinositide phospholipase C; 1-phosphatidylinositol 4	5.42516	0.00197126	0.184326	0	2	13	18.5	0.911497	25748
UY3_04982	8469.XP_007057671.1	HEAT repeat-containing protein 6-like	5.75052	0.00415494	0.173897	0.4	5	13	11.6	0.90499	62490
COL21A1	8469.XP_007055137.1	Collagen alpha-1(XXI) chain	0	0	0	0	0	0	0	Infinity	0
SMG9	8469.XP_007072735.1	SMG9	5.09667	0.000359593	0.196206	0.333333	3	12	13.6667	0.918067	2782
TET3	8469.XP_007067519.1	Methylcytosine dioxygenase TET3	5.66008	0.002079	0.176676	0	2	12	6.5	0.906798	8384
TAL1	8469.XP_007061657.1	T-cell acute lymphocytic leukemia protein 1 homolog	1	1	1	0	2	1	1	1	2
AFTPH	8469.XP_007062935.1	Aftiphilin	2	0	0.5	0	1	3	2	0.5	0
PLCB3	8469.XP_007070448.1	Phosphoinositide phospholipase C; 1-phosphatidylinositol 4	5.57277	0	0.179444	0	1	13	34	0.908545	0
XP_007054118.1	8469.XP_007054118.1	E3 ubiquitin-protein ligase RNF167-like	0	0	0	0	0	0	0	Infinity	0
RNF168	8469.XP_007067445.1	E3 ubiquitin-protein ligase RNF168	5.31289	0	0.188221	1	3	12	15	0.913742	0
PAX2	8469.XP_007053447.1	Paired box protein Pax-2	7.03638	0	0.142118	0	1	13	2	0.879272	0
TIMM22	8469.XP_007072868.1	Mitochondrial import inner membrane translocase subunit Tim22; The sequence of the model RefSeq protein was modified relative to its source genomic sequence to represent the inferred complete CDS: inserted 1 base in 1 codon	6.28586	0	0.159087	0	1	14	7	0.894283	0
TACR3	8469.XP_007054538.1	neuromedin-K receptor; Belongs to the G-protein coupled receptor 1 family.	2.4	0	0.416667	0	1	3	2	0.65	0
SLC2A12	8469.XP_007058110.1	Solute carrier family 2	0	0	0	0	0	0	0	Infinity	0
ANXA5	8469.XP_007056892.1	Annexin A5	5.10811	0	0.195767	1	3	11	17	0.917838	0
BRD3	8469.XP_007061072.1	Bromodomain-containing protein 3 isoform X1	0	0	0	0	0	0	0	Infinity	0
UY3_03305	8469.XP_007055963.1	Elongation factor 1-alpha-like	5.12162	0.000693393	0.195251	0.6	5	13	26.6	0.917568	9994
TNKS1BP1	8469.XP_007068256.1	182 kDa tankyrase-1-binding protein	7.22141	0	0.138477	0	1	15	4	0.875572	0
DSTYK	8469.XP_007065220.1	Dual serine/threonine and tyrosine protein kinase	1	0	1	0	1	1	1	1	0
Ficolin-2	8469.XP_007067688.1	Ficolin-2-like	0	0	0	0	0	0	0	Infinity	0
PRSS23	8469.XP_007060667.1	Serine protease 23	0	0	0	0	0	0	0	Infinity	0
FMN2	8469.XP_007058033.1	Formin-2; The sequence of the model RefSeq protein was modified relative to its source genomic sequence to represent the inferred complete CDS: deleted 1 base in 1 codon	0	0	0	0	0	0	0	Infinity	0
ADM	8469.XP_007057203.1	Adrenomedullin; ADM	6.5499	0.002079	0.152674	0.333333	3	14	2	0.889002	6664
CLTB	8469.XP_007065077.1	Clathrin light chain; Clathrin is the major protein of the polyhedral coat of coated pits and vesicles.	6.39085	0.00829654	0.156474	0	3	14	2	0.892183	47574
OGG1	8469.XP_007066021.1	N-glycosylase/DNA lyase	5.26091	0.00213467	0.190081	0.3	5	10	12.6	0.914782	33574
TCF25	8469.XP_007053323.1	Transcription factor 25	5.57484	0.00102151	0.179377	0.333333	3	13	3.33333	0.908503	3846
UY3_01062	8469.XP_007053591.1	Gonadotropin-releasing hormone II receptor-like; Belongs to the G-protein coupled receptor 1 family.	1.8	0	0.555556	1	2	3	3	0.8	0
XP_007056959.1	8469.XP_007056959.1	Putative nuclease HARBI1-like	0	0	0	0	0	0	0	Infinity	0
SERPINI1	8469.XP_007055568.1	Neuroserpin; Derived by automated computational analysis using gene prediction method: Gnomon. Supporting evidence includes similarity to: 3 mRNAs	0	0	0	0	0	0	0	Infinity	0
GPR180	8469.XP_007066279.1	Integral membrane protein GPR180	1	0	1	0	1	1	1	1	0
FAM160A1	8469.XP_007071313.1	The sequence of the model RefSeq protein was modified relative to its source genomic sequence to represent the inferred complete CDS: substituted 1 base at 1 genomic stop codon	11.8825	0	0.0841571	0	1	18	2	0.782349	0
SLC6A6	8469.XP_007060015.1	Transporter; Sodium- and chloride-dependent taurine transporter; Belongs to the sodium:neurotransmitter symporter (SNF) (TC 2.A.22) family.	0	0	0	0	0	0	0	Infinity	0
SOX30	8469.XP_007058494.1	Transcription factor SOX-30	0	0	0	0	0	0	0	Infinity	0
PRRC2B	8469.XP_007061107.1	Protein PRRC2B	6.48129	0	0.15429	0	1	12	6	0.890374	0
PA2G4	8469.XP_007064970.1	Proliferation-associated 2G4; Derived by automated computational analysis using gene prediction method: Gnomon. Supporting evidence includes similarity to: 15 ESTs	4.37838	0.0164319	0.228395	0.537112	39	11	29.0256	0.932432	171404
BRAF	8469.XP_007072358.1	Serine/threonine-protein kinase B-raf	5.61435	0.00498378	0.178115	0	3	12	5	0.907713	28736
PNO1	8469.XP_007062927.1	Partner of NOB1 homolog; RNA-binding protein PNO1	4.4896	0.0256957	0.222737	0.573574	37	11	30.4595	0.930208	245858
FZD5	8469.XP_007071980.1	Frizzled-5; Belongs to the G-protein coupled receptor Fz/Smo family.	1.33333	0.166667	0.75	0	2	2	2	0.833333	2
XP_007071889.1	8469.XP_007071889.1	Gamma-crystallin B-like	0	0	0	0	0	0	0	Infinity	0
DNAH11	8469.XP_007066240.1	Dynein heavy chain 11	0	0	0	0	0	0	0	Infinity	0
ZNF142	8469.XP_007060491.1	Zinc finger protein 142	0	0	0	0	0	0	0	Infinity	0
WNT10A	8469.XP_007060496.1	Protein Wnt; Ligand for members of the frizzled family of seven transmembrane receptors.	1.33333	0.166667	0.75	0	2	2	2	0.833333	2
DNAH12	8469.XP_007060828.1	Dynein heavy chain 12	0	0	0	0	0	0	0	Infinity	0
WNT10B	8469.XP_007064795.1	Protein Wnt-10b	1.33333	0.166667	0.75	0	2	2	2	0.833333	2
NKX2-4	8469.XP_007063235.1	Homeobox protein Nkx-2.4	0	0	0	0	0	0	0	Infinity	0
SSR1	8469.XP_007064302.1	Signal sequence receptor subunit 1; Translocon-associated protein subunit alpha isoform X1	1	0	1	0	1	1	1	1	0
TIMM10	8469.XP_007068247.1	Mitochondrial import inner membrane translocase subunit Tim10	5.2869	0.012716	0.189147	0.047619	7	13	13.8571	0.914262	178006
SERPINH1	8469.XP_007062348.1	Serpin H1; Belongs to the serpin family.	1.75	0	0.571429	0	1	2	4	0.8125	0
NKX2-1	8469.XP_007065310.1	Thyroid transcription factor 1; Homeobox protein Nkx-2.1	2.71429	0.285714	0.368421	0	2	5	1.5	0.428571	12
FAM149A	8469.XP_007072769.1	The sequence of the model RefSeq protein was modified relative to its source genomic sequence to represent the inferred complete CDS: inserted 2 bases in 1 codon	0	0	0	0	0	0	0	Infinity	0
NOLC1	8469.XP_007053452.1	2-hydroxyacylsphingosine 1-beta-galactosyltransferase; The sequence of the model RefSeq protein was modified relative to its source genomic sequence to represent the inferred complete CDS: substituted 1 base at 1 genomic stop codon; Belongs to the UDP-glycosyltransferase family.	4.6632	0.000229279	0.214445	0.865942	24	11	35.5833	0.926736	5168
XP_007053156.1	8469.XP_007053156.1	Transmembrane protein 176A-like	0	0	0	0	0	0	0	Infinity	0
RPL29	8469.XP_007061920.1	60S ribosomal protein L29	4.83368	0.000696996	0.206882	0.758333	16	12	23.8125	0.923326	19368
NHLRC2	8469.XP_007056393.1	NHL repeat-containing protein 2	1	0	1	0	1	1	1	1	0
IFT81	8469.XP_007058346.1	Intraflagellar transport protein 81 homolog isoform X1	12.8597	0	0.0777625	1	3	19	4	0.762807	0
TEP1	8469.XP_007072051.1	Telomerase associated protein 1; The sequence of the model RefSeq protein was modified relative to its source genomic sequence to represent the inferred complete CDS: substituted 1 base at 1 genomic stop codon	0	0	0	0	0	0	0	Infinity	0
UY3_09222	8469.XP_007062191.1	Cell surface glycoprotein CD200 receptor 1-A-like	0	0	0	0	0	0	0	Infinity	0
ABCA10	8469.XP_007055186.1	ATP-binding cassette sub-family A member 10-like	0	0	0	0	0	0	0	Infinity	0
DYNC1LI1	8469.XP_007067284.1	Cytoplasmic dynein 1 light intermediate chain 1	9.88669	0.0134291	0.101146	0	4	16	2.75	0.822266	160102
RNF123	8469.XP_007061840.1	E3 ubiquitin-protein ligase RNF123	6.00624	0.00012192	0.166494	0	2	13	2.5	0.899875	810
UY3_12236	8469.XP_007065409.1	Neuropeptide FF receptor 1-like; Belongs to the G-protein coupled receptor 1 family.	0	0	0	0	0	0	0	Infinity	0
CPED1	8469.XP_007053189.1	The sequence of the model RefSeq protein was modified relative to its source genomic sequence to represent the inferred complete CDS: substituted 1 base at 1 genomic stop codon	0	0	0	0	0	0	0	Infinity	0
SYTL3	8469.XP_007059159.1	Synaptotagmin-like protein 3	0	0	0	0	0	0	0	Infinity	0
XP_007068379.1	8469.XP_007068379.1	GC-rich sequence DNA-binding factor 2-like	5.87734	0	0.170145	0	1	13	19	0.902453	0
AARSD1	8469.XP_007054845.1	alanyl-tRNA editing protein Aarsd1	5.14553	0.0021117	0.194343	0.5	5	13	8.2	0.917089	8502
RPL22	8469.XP_007070278.1	60S ribosomal protein L22	4.74844	0.0113819	0.210595	0.627451	18	12	24.2222	0.925031	92934
DAPK2	8469.XP_007070079.1	Death-associated protein kinase 3	5.85343	0	0.17084	0	1	12	9	0.902931	0
SERPINF1	8469.XP_007057759.1	Pigment epithelium-derived factor; Belongs to the serpin family.	0	0	0	0	0	0	0	Infinity	0
UNC13A	8469.XP_007068630.1	Protein unc-13 homolog A-like	1	0	1	0	1	1	1	1	0
ACOT7	8469.XP_007070208.1	Cytosolic acyl coenzyme A thioester hydrolase; The sequence of the model RefSeq protein was modified relative to its source genomic sequence to represent the inferred complete CDS: inserted 2 bases in 1 codon; deleted 1 base in 1 codon	0	0	0	0	0	0	0	Infinity	0
ACOT8	8469.XP_007067827.1	Acyl-coenzyme A thioesterase 8	8.74844	0	0.114306	0	1	17	3	0.845031	0
MED1	8469.XP_007062020.1	Mediator of RNA polymerase II transcription subunit 1; Component of the Mediator complex	5.27963	7.93256e-05	0.189407	0.8	5	11	8.6	0.914407	838
UNC13B	8469.XP_007055981.1	Protein unc-13 homolog B	1	0	1	0	1	1	1	1	0
EARS2	8469.XP_007058677.1	Putative glutamyl-tRNA synthetase; Probable glutamate--tRNA ligase	5.28067	0.00805687	0.18937	0.472222	9	13	19.3333	0.914387	123872
ANKS1A	8469.XP_007063612.1	Ankyrin repeat and SAM domain-containing protein 1A	0	0	0	0	0	0	0	Infinity	0
GNAT1	8469.XP_007052737.1	Guanine nucleotide-binding protein G(t) subunit alpha-1	1	1	1	0	3	1	1	1	6
RTTN	8469.XP_007059993.1	Rotatin	0	0	0	0	0	0	0	Infinity	0
XP_007054275.1	8469.XP_007054275.1	Tapasin-related protein-like	0	0	0	0	0	0	0	Infinity	0
ZXDC	8469.XP_007060021.1	Zinc finger protein ZXDC	0	0	0	0	0	0	0	Infinity	0
STMN1	8469.XP_007070910.1	Stathmin	5.12578	0	0.195092	0	1	12	48	0.917484	0
MYB	8469.XP_007058116.1	Transcriptional activator Myb isoform X1	0	0	0	0	0	0	0	Infinity	0
HENMT1	8469.XP_007055289.1	Small RNA 2'-O-methyltransferase	0	0	0	0	0	0	0	Infinity	0
UY3_02184	8469.XP_007054721.1	Core histone macro-H2A.2; Derived by automated computational analysis using gene prediction method: Gnomon. Supporting evidence includes similarity to: 9 ESTs	6.58524	0	0.151855	0	1	13	3	0.888295	0
GLE1	8469.XP_007057367.1	Nucleoporin GLE1; Derived by automated computational analysis using gene prediction method: Gnomon. Supporting evidence includes similarity to: 1 mRNA	5.99168	0.00697787	0.166898	0.222222	9	12	6	0.900166	50312
DCAF6	8469.XP_007057643.1	DDB1- and CUL4-associated factor 6	0	0	0	0	0	0	0	Infinity	0
GLDN	8469.XP_007066922.1	Gliomedin	3.33333	0	0.3	1	2	5	2.5	0.222222	0
DCAF5	8469.XP_007054308.1	DDB1- and CUL4-associated factor 5 isoform X1	1	0	1	0	1	1	1	1	0
THYN1	8469.XP_007067034.1	Thymocyte nuclear protein 1	1	1	1	0	2	1	1	1	2
RAPH1	8469.XP_007071990.1	Ras-associated and pleckstrin homology domains-containing protein 1	0	0	0	0	0	0	0	Infinity	0
CLPB	8469.XP_007068900.1	Caseinolytic peptidase B protein homolog	5.10187	0.0101213	0.196007	0.266667	6	13	8	0.917963	49994
TRIO	8469.XP_007065085.1	Triple functional domain protein	6.86279	0	0.145713	0	1	14	7	0.882744	0
RPL30	8469.XP_007056057.1	60S ribosomal protein L30	4.69231	0.00462204	0.213115	0.509524	21	12	25.2857	0.926154	69162
CNTFR	8469.XP_007066596.1	Ciliary neurotrophic factor receptor subunit alpha	0	0	0	0	0	0	0	Infinity	0
VIT	8469.XP_007058006.1	Vitrin; The sequence of the model RefSeq protein was modified relative to its source genomic sequence to represent the inferred complete CDS: substituted 1 base at 1 genomic stop codon	0	0	0	0	0	0	0	Infinity	0
CPVL	8469.XP_007053726.1	Carboxypeptidase; The sequence of the model RefSeq protein was modified relative to its source genomic sequence to represent the inferred complete CDS: inserted 2 bases in 1 codon; Belongs to the peptidase S10 family.	0	0	0	0	0	0	0	Infinity	0
CCDC174	8469.XP_007060014.1	Coiled-coil domain-containing protein 174	8.98337	0	0.111317	0	1	15	2	0.840333	0
RBM45	8469.XP_007060570.1	RNA-binding protein 45	0	0	0	0	0	0	0	Infinity	0
TAF5	8469.XP_007057933.1	TATA-box binding protein associated factor 5; Transcription initiation factor TFIID subunit 5	9.74636	0	0.102602	1	3	16	3.33333	0.825073	0
QRICH1	8469.XP_007072709.1	Inosine-5'-monophosphate dehydrogenase; Catalyzes the conversion of inosine 5'-phosphate (IMP) to xanthosine 5'-phosphate (XMP)	0	0	0	0	0	0	0	Infinity	0
R3HDM4	8469.XP_007072250.1	R3H domain-containing protein 4	0	0	0	0	0	0	0	Infinity	0
NUP35	8469.XP_007069822.1	Nucleoporin NUP53; Derived by automated computational analysis using gene prediction method: Gnomon. Supporting evidence includes similarity to: 5 Proteins	5.77235	0.00210938	0.17324	0.5	4	13	9.5	0.904553	12034
TAF8	8469.XP_007065196.1	TATA-box binding protein associated factor 8; Transcription initiation factor TFIID subunit 8	9.74636	0	0.102602	1	3	16	3.33333	0.825073	0
GLB1	8469.XP_007070744.1	Beta-galactosidase; Derived by automated computational analysis using gene prediction method: Gnomon. Supporting evidence includes similarity to: 1 mRNA	9.14345	0.00664375	0.109368	0.25	8	16	3.125	0.837131	113578
FAM179A	8469.XP_007071750.1	Protein FAM179A	6.7474	0.002079	0.148205	0	2	14	3	0.885052	31244
RPIA	8469.XP_007069396.1	Ribose-5-phosphate isomerase	5.13617	0.0269066	0.194697	0.142857	7	12	12.8571	0.917277	146912
ACVR2A	8469.XP_007061851.1	Serine/threonine-protein kinase receptor; Activin receptor type-2A	0	0	0	0	0	0	0	Infinity	0
MAPK15	8469.XP_007061485.1	Mitogen-activated protein kinase 15	1	0	1	0	1	1	1	1	0
TAF10	8469.XP_007066075.1	Transcription initiation factor TFIID subunit 10; TFIID is a multimeric protein complex that plays a central role in mediating promoter responses to various activators and repressors.	8.74948	0.00622403	0.114293	0.5	4	15	3.25	0.84501	34608
UY3_04492	8469.XP_007057193.1	Vitamin D 25-hydroxylase-like	0	0	0	0	0	0	0	Infinity	0
TAF12	8469.XP_007064899.1	Transcription initiation factor TFIID subunit 12; Derived by automated computational analysis using gene prediction method: Gnomon. Supporting evidence includes similarity to: 2 mRNAs	9.74636	0	0.102602	1	3	16	3.33333	0.825073	0
CCDC175	8469.XP_007065394.1	Coiled-coil domain-containing protein 175	0	0	0	0	0	0	0	Infinity	0
TAF15	8469.XP_007067192.1	TAF15 RNA polymerase II	5.66736	0	0.176449	1	8	14	14.375	0.906653	0
RBM39	8469.XP_007053979.1	RNA binding motif protein 39; Derived by automated computational analysis using gene prediction method: Gnomon. Supporting evidence includes similarity to: 1 mRNA	5.19751	0.00939545	0.1924	0.138889	9	13	10.4444	0.91605	45310
R3HDML	8469.XP_007067350.1	R3H domain containing like; Derived by automated computational analysis using gene prediction method: Gnomon. Supporting evidence includes similarity to: 11 Proteins	1	0	1	0	1	1	1	1	0
MBTPS1	8469.XP_007054037.1	Membrane-bound transcription factor site-1 protease	0	0	0	0	0	0	0	Infinity	0
MDH1B	8469.XP_007071896.1	Putative malate dehydrogenase 1B; Derived by automated computational analysis using gene prediction method: Gnomon. Supporting evidence includes similarity to: 2 mRNAs	7.66528	0	0.130458	0	1	15	6	0.866694	0
PDLIM7	8469.XP_007065060.1	PDZ and LIM domain protein 7	0	0	0	0	0	0	0	Infinity	0
PDLIM5	8469.XP_007063067.1	PDZ and LIM domain 5; Derived by automated computational analysis using gene prediction method: Gnomon. Supporting evidence includes similarity to: 15 Proteins	0	0	0	0	0	0	0	Infinity	0
UY3_07570	8469.XP_007060388.1	Taste receptor type 1 member 1-like	0	0	0	0	0	0	0	Infinity	0
TNKS2	8469.XP_007059469.1	Poly [ADP-ribose] polymerase; Tankyrase-2 isoform X1	0	0	0	0	0	0	0	Infinity	0
EFS	8469.XP_007065474.1	Embryonal Fyn-associated substrate	0	0	0	0	0	0	0	Infinity	0
RAB40B	8469.XP_007072569.1	RAB40B	0	0	0	0	0	0	0	Infinity	0
HMGCL	8469.XP_007068091.1	hydroxymethylglutaryl-CoA lyase	7.15904	0	0.139683	0	1	14	3	0.876819	0
FAM132A	8469.XP_007070261.1	Protein FAM132A	0	0	0	0	0	0	0	Infinity	0
ATAD2B	8469.XP_007061498.1	ATPase family AAA domain-containing protein 2B	6.48753	0	0.154142	0	1	12	11	0.890249	0
XP_007068322.1	8469.XP_007068322.1	28S ribosomal protein S12	4.60603	0.00484652	0.217107	0.563492	28	12	22.7143	0.927879	86904
ATP2C1	8469.XP_007064361.1	Calcium-transporting ATPase type 2C member 1 isoform X1; Belongs to the cation transport ATPase (P-type) (TC 3.A.3) family.	0	0	0	0	0	0	0	Infinity	0
HMGCR	8469.XP_007064561.1	3-hydroxy-3-methylglutaryl-coenzyme A reductase	6.24324	0.0144964	0.160173	0	3	14	3.33333	0.895135	91128
XP_007069452.1	8469.XP_007069452.1	Gamma-aminobutyric acid receptor subunit beta-1-like	0	0	0	0	0	0	0	Infinity	0
CRMP1	8469.XP_007062995.1	Collapsin response mediator protein 1; Dihydropyrimidinase-related protein 1 isoform X1	4.26316	0	0.234568	0	1	7	2	0.184211	0
DBX1	8469.XP_007067995.1	Homeobox protein DBX1	0	0	0	0	0	0	0	Infinity	0
LAMA4	8469.XP_007057482.1	Laminin subunit alpha-4; Derived by automated computational analysis using gene prediction method: Gnomon. Supporting evidence includes similarity to: 2 ESTs	3.22222	0	0.310345	0	1	5	3	0.259259	0
LAMA2	8469.XP_007060852.1	Laminin subunit alpha-2	0	0	0	0	0	0	0	Infinity	0
UY3_14608	8469.XP_007067821.1	Probable ATP-dependent RNA helicase DDX27-like; Belongs to the DEAD box helicase family.	4.46881	0.0071054	0.223773	0.592308	40	11	28.675	0.930624	99598
XP_007070144.1	8469.XP_007070144.1	Membrane-spanning 4-domains subfamily A member 12-like	0	0	0	0	0	0	0	Infinity	0
XP_007058175.1	8469.XP_007058175.1	T-cell surface glycoprotein CD8 alpha chain-like	0	0	0	0	0	0	0	Infinity	0
LAMA5	8469.XP_007059930.1	Laminin subunit alpha-5	1.6	0.4	0.625	0.333333	3	3	2	0.8	8
UY3_13497	8469.XP_007066642.1	SH3 and multiple ankyrin repeat domains protein 3-like	1.33333	0.666667	0.75	0	2	2	1.5	0.833333	4
FAM154B	8469.XP_007066898.1	Protein FAM154B	0	0	0	0	0	0	0	Infinity	0
WDR65	8469.XP_007061569.1	WD repeat-containing protein 65	0	0	0	0	0	0	0	Infinity	0
CCDC147	8469.XP_007057939.1	Coiled-coil domain-containing protein 147	0	0	0	0	0	0	0	Infinity	0
IRF2	8469.XP_007054527.1	Interferon regulatory factor 2	1.5	0	0.666667	0	1	2	2	0.75	0
CDHR2	8469.XP_007065074.1	Cadherin related family member 2; The sequence of the model RefSeq protein was modified relative to its source genomic sequence to represent the inferred complete CDS: substituted 1 base at 1 genomic stop codon	0	0	0	0	0	0	0	Infinity	0
IRF1	8469.XP_007063687.1	Interferon regulatory factor 1	6.5738	0.000709494	0.152119	0	2	13	3.5	0.888524	3896
TBC1D5	8469.XP_007053301.1	TBC1 domain family member 5 isoform X1	1	0	1	0	1	1	1	1	0
UY3_18940	8469.XP_007072349.1	Poly [ADP-ribose] polymerase; Cystine/glutamate transporter-like	0	0	0	0	0	0	0	Infinity	0
SFPQ	8469.XP_007060816.1	Splicing factor	6.19127	0.000346991	0.161518	0.733333	6	14	13	0.896175	3118
TCTE1	8469.XP_007071796.1	T-complex-associated testis-expressed protein 1	0	0	0	0	0	0	0	Infinity	0
PEX1	8469.XP_007060360.1	Peroxisome biogenesis factor 1 isoform X1	7.38254	0.002079	0.135455	0	2	15	2.5	0.872349	11680
XP_007071660.1	8469.XP_007071660.1	HIRA-interacting protein 3-like	0	0	0	0	0	0	0	Infinity	0
DARS2	8469.XP_007061237.1	Aspartyl-tRNA synthetase; aspartate--tRNA ligase	6.2526	0.00421288	0.159933	0.333333	3	14	5.33333	0.894948	53330
TBC1D9	8469.XP_007062882.1	TBC1 domain family member 9 isoform X1	0	0	0	0	0	0	0	Infinity	0
PLA2G4A	8469.XP_007056754.1	Cytosolic phospholipase A2	3	0.368421	0.333333	0	3	5	2.33333	0.5	126
TBC1D8	8469.XP_007069023.1	TBC1 domain family member 8 isoform X1	0	0	0	0	0	0	0	Infinity	0
UY3_18806	8469.XP_007072249.1	G-protein coupled receptor 54-like	2	0	0.5	0	1	3	4	0.75	0
RBM19	8469.XP_007072035.1	Probable RNA-binding protein 19	4.67775	0.000211551	0.213778	0.797701	30	11	32.4667	0.926445	4408
GLRX5	8469.XP_007065007.1	Glutaredoxin-related protein 5; The sequence of the model RefSeq protein was modified relative to its source genomic sequence to represent the inferred complete CDS: inserted 1 base in 1 codon	1.25	0.666667	0.8	0.333333	3	2	2	0.916667	8
EED	8469.XP_007060662.1	Polycomb protein EED isoform X1	5.65177	0.000291121	0.176936	0.333333	3	12	7.33333	0.906965	1788
DYNLT1	8469.XP_007059158.1	Dynein light chain Tctex-type 1	8.90852	0.0246668	0.112252	0	3	15	2.66667	0.84183	306690
NCBP1	8469.XP_007057984.1	Nuclear cap-binding protein subunit 1	4.60707	0.0185289	0.217058	0.138889	9	12	14.2222	0.927859	183406
ARHGEF12	8469.XP_007067054.1	Rho guanine nucleotide exchange factor 12; The sequence of the model RefSeq protein was modified relative to its source genomic sequence to represent the inferred complete CDS: substituted 1 base at 1 genomic stop codon	6.69751	0.002079	0.149309	0	2	13	2	0.88605	9934
DDX59	8469.XP_007055261.1	Probable ATP-dependent RNA helicase DDX59	5.38773	0.00636694	0.185607	0.333333	4	12	21.5	0.912245	69492
WDR16	8469.XP_007072557.1	Cilia and flagella associated protein 52; WD repeat-containing protein 16	1	0	1	0	1	1	1	1	0
RBM14	8469.XP_007070431.1	RNA-binding protein 14	5.66528	5.90937e-05	0.176514	0.916667	9	14	13.6667	0.906694	1136
RBM17	8469.XP_007056591.1	RNA binding motif protein 17; Splicing factor 45 isoform X1	5.29522	0	0.18885	1	2	12	39	0.914096	0
RBM33	8469.XP_007061553.1	RNA-binding protein 33	5.88462	0	0.169935	0	1	13	14	0.902308	0
WDR96	8469.XP_007057938.1	WD repeat-containing protein 96	0	0	0	0	0	0	0	Infinity	0
TTC40	8469.XP_007053134.1	TPR repeat-containing protein C10orf93; Tetratricopeptide repeat protein 40	0	0	0	0	0	0	0	Infinity	0
MLST8	8469.XP_007058635.1	MTOR associated protein	5.15696	0.0131458	0.193913	0.142857	7	11	6.71429	0.916861	79688
UY3_06611	8469.XP_007059370.1	Sulfotransferase family cytosolic 2B member 1-like	0	0	0	0	0	0	0	Infinity	0
UBE2Q1	8469.XP_007067886.1	Ubiquitin-conjugating enzyme E2 Q1; Belongs to the ubiquitin-conjugating enzyme family.	0	0	0	0	0	0	0	Infinity	0
ABHD16A	8469.XP_007070489.1	Abhydrolase domain-containing protein 16A-like	0	0	0	0	0	0	0	Infinity	0
CALB2	8469.XP_007052763.1	Calbindin 2; Calretinin	0	0	0	0	0	0	0	Infinity	0
AFF1	8469.XP_007066710.1	AF4/FMR2 family member 1; The sequence of the model RefSeq protein was modified relative to its source genomic sequence to represent the inferred complete CDS: substituted 1 base at 1 genomic stop codon	1	0	1	0	1	1	1	1	0
CHD1	8469.XP_007054152.1	chromodomain-helicase-DNA-binding protein 1 isoform X1	6.2422	0	0.1602	0	1	13	8	0.895156	0
AFF3	8469.XP_007069031.1	AF4/FMR2 family member 3	0	0	0	0	0	0	0	Infinity	0
PPP1R9A	8469.XP_007067712.1	Neurabin-1	0	0	0	0	0	0	0	Infinity	0
ARHGEF10L	8469.XP_007069361.1	Rho guanine nucleotide exchange factor 10-like protein	0	0	0	0	0	0	0	Infinity	0
ATP2A2	8469.XP_007058345.1	Sarcoplasmic/endoplasmic reticulum calcium ATPase 2; Belongs to the cation transport ATPase (P-type) (TC 3.A.3) family.	0	0	0	0	0	0	0	Infinity	0
DDX42	8469.XP_007061954.1	ATP-dependent RNA helicase DDX42	5.29522	0	0.18885	1	2	12	39	0.914096	0
CNRIP1	8469.XP_007062926.1	CB1 cannabinoid receptor-interacting protein 1	5.48441	0.00415368	0.182335	0	2	12	19.5	0.910312	22208
UY3_18860	8469.XP_007072160.1	Cathepsin L1-like; Belongs to the peptidase C1 family.	0	0	0	0	0	0	0	Infinity	0
UY3_15452	8469.XP_007068727.1	Transmembrane 9 superfamily member; Derived by automated computational analysis using gene prediction method: Gnomon. Supporting evidence includes similarity to: 4 mRNAs	0	0	0	0	0	0	0	Infinity	0
LAMC3	8469.XP_007061176.1	Laminin subunit gamma-3	1.4	0.6	0.714286	0.333333	3	2	2.33333	0.866667	12
MAST4	8469.XP_007059080.1	Microtubule-associated serine/threonine-protein kinase 4	1	0	1	0	1	1	1	1	0
RBM26	8469.XP_007061328.1	RNA-binding protein 26	0	0	0	0	0	0	0	Infinity	0
PRR7	8469.XP_007065058.1	Proline-rich protein 7	0	0	0	0	0	0	0	Infinity	0
GSK3B	8469.XP_007072766.1	Glycogen synthase kinase 3 beta; The sequence of the model RefSeq protein was modified relative to its source genomic sequence to represent the inferred complete CDS: substituted 1 base at 1 genomic stop codon	5.02599	0.0483709	0.198966	0.2	6	11	10.3333	0.91948	236286
YWHAE	8469.XP_007057769.1	Tyrosine 3-monooxygenase/tryptophan 5-monooxygenase activation protein epsilon; 14-3-3 protein epsilon	5.62578	0.002079	0.177753	0.333333	3	12	6	0.907484	17108
PICALM	8469.XP_007060661.1	Phosphatidylinositol-binding clathrin assembly protein	1.66667	0	0.6	0	1	2	3	0.777778	0
UY3_14904	8469.XP_007068157.1	Potassium/sodium hyperpolarization-activated cyclic nucleotide-gated channel 4-like	0	0	0	0	0	0	0	Infinity	0
TAB1	8469.XP_007053395.1	TGF-beta-activated kinase 1 and MAP3K7-binding protein 1	5.93971	0.000323943	0.168358	0.666667	3	12	6	0.901206	1240
PHF13	8469.XP_007060394.1	PHD finger protein 13	0	0	0	0	0	0	0	Infinity	0
STT3A	8469.XP_007066428.1	Dolichyl-diphosphooligosaccharide--protein glycosyltransferase subunit STT3A	5.7183	0.0089535	0.174877	0	2	13	10	0.905634	68814
PQLC2	8469.XP_007067774.1	PQ-loop repeat-containing protein 2; Lysosomal amino acid transporter 1 homolog	0	0	0	0	0	0	0	Infinity	0
FMC1	8469.XP_007064151.1	Formation of mitochondrial complex V assembly factor 1 homolog; UPF0562 protein C7orf55 homolog	0	0	0	0	0	0	0	Infinity	0
UY3_11254	8469.XP_007064354.1	Sjoegren syndrome nuclear autoantigen 1 homolog	1.5	0	0.666667	0	1	2	2	0.75	0
MLLT4	8469.XP_007071137.1	Afadin; Derived by automated computational analysis using gene prediction method: Gnomon. Supporting evidence includes similarity to: 1 mRNA	5.87526	0.03147	0.170205	0.190476	7	12	5.14286	0.902495	226712
CLK2	8469.XP_007068143.1	CDC like kinase 2; The sequence of the model RefSeq protein was modified relative to its source genomic sequence to represent the inferred complete CDS: inserted 2 bases in 1 codon; substituted 1 base at 1 genomic stop codon	0	0	0	0	0	0	0	Infinity	0
CLK3	8469.XP_007065911.1	CDC like kinase 3; The sequence of the model RefSeq protein was modified relative to its source genomic sequence to represent the inferred complete CDS: substituted 1 base at 1 genomic stop codon	0	0	0	0	0	0	0	Infinity	0
CLK4	8469.XP_007053661.1	Dual specificity protein kinase CLK4	0	0	0	0	0	0	0	Infinity	0
NFXL1	8469.XP_007071153.1	NF-X1-type zinc finger protein NFXL1	7.99168	0	0.12513	0	1	14	3	0.860166	0
CCDC137	8469.XP_007070998.1	Tetraspanin; Coiled-coil domain-containing protein 137	0	0	0	0	0	0	0	Infinity	0
CCDC138	8469.XP_007054684.1	Coiled-coil domain-containing protein 138	7.67152	0	0.130352	1	4	14	5.75	0.86657	0
XP_007070291.1	8469.XP_007070291.1	Tumor necrosis factor receptor superfamily member 14-like	6.78482	0	0.147388	0	1	13	8	0.884304	0
KLHL29	8469.XP_007061491.1	Kelch-like protein 29	8.16632	0.00633701	0.122454	0.333333	3	16	5.33333	0.856674	213398
TAC3	8469.XP_007066651.1	Tachykinin-3	1.6	0.4	0.625	0	2	2	2.5	0.85	8
CAMTA1	8469.XP_007060392.1	Calmodulin-binding transcription activator 1	7.75364	0	0.128972	0	1	16	5	0.864927	0
PACSIN3	8469.XP_007054357.1	Protein kinase C and casein kinase substrate in neurons protein 3 isoform X1	1.2	0.9	0.833333	0	4	2	1.25	0.95	18
XP_007063033.1	8469.XP_007063033.1	Tumor necrosis factor receptor superfamily member 6-like	0	0	0	0	0	0	0	Infinity	0
NPHP1	8469.XP_007063223.1	Nephrocystin 1; The sequence of the model RefSeq protein was modified relative to its source genomic sequence to represent the inferred complete CDS: inserted 2 bases in 1 codon	6.98233	0.00623016	0.143219	0.266667	6	13	4.16667	0.880353	54466
DEAF1	8469.XP_007060972.1	Deformed epidermal autoregulatory factor 1 like protein; The sequence of the model RefSeq protein was modified relative to its source genomic sequence to represent the inferred complete CDS: deleted 1 base in 1 codon	6.41476	0.00415584	0.15589	0	3	14	1.33333	0.891705	28938
CALD1	8469.XP_007060620.1	Caldesmon; Non-muscle caldesmon isoform X1	0	0	0	0	0	0	0	Infinity	0
KIF3B	8469.XP_007062544.1	Kinesin-like protein KIF3B	0	0	0	0	0	0	0	Infinity	0
RPF1	8469.XP_007068831.1	Ribosome production factor 1	4.6736	0.000250747	0.213968	0.839901	29	11	34.4483	0.926528	6912
RASGRP3	8469.XP_007071707.1	Ras guanyl-releasing protein 3	5.94491	0	0.168211	0	1	12	11	0.901102	0
SLC1A7	8469.XP_007062240.1	Excitatory amino acid transporter 5	0	0	0	0	0	0	0	Infinity	0
ACACB	8469.XP_007058395.1	Acetyl-CoA carboxylase 2; The sequence of the model RefSeq protein was modified relative to its source genomic sequence to represent the inferred complete CDS: substituted 1 base at 1 genomic stop codon	5.21933	0.0382831	0.191595	0	3	12	10	0.915613	145896
NDRG1	8469.XP_007066819.1	Protein NDRG1	6.45322	0	0.154961	0	1	12	2	0.890936	0
XP_007063329.1	8469.XP_007063329.1	Diacylglycerol O-acyltransferase 1-like	8.31081	0.00829005	0.120325	0.4	5	16	4	0.853784	54104
RPF2	8469.XP_007057522.1	Ribosome production factor 2 homolog	4.54574	0.00819743	0.219986	0.56446	42	11	28.0952	0.929085	114542
KLHL13	8469.XP_007056200.1	Kelch-like protein 13 isoform X1	0	0	0	0	0	0	0	Infinity	0
PSEN2	8469.XP_007071762.1	Presenilin-2; Derived by automated computational analysis using gene prediction method: Gnomon. Supporting evidence includes similarity to: 1 mRNA	8.38254	0.002079	0.119296	0	2	16	1.5	0.852349	11898
NPR3	8469.XP_007069491.1	Atrial natriuretic peptide receptor 3-like	0	0	0	0	0	0	0	Infinity	0
YTHDC2	8469.XP_007055474.1	Probable ATP-dependent RNA helicase YTHDC2	4.54262	0.0190393	0.220137	0.19697	12	12	21	0.929148	170628
NPR2	8469.XP_007072785.1	Guanylate cyclase; The sequence of the model RefSeq protein was modified relative to its source genomic sequence to represent the inferred complete CDS: inserted 2 bases in 1 codon	7.22869	0.000126916	0.138338	0	2	15	7	0.875426	17640
YTHDC1	8469.XP_007064260.1	YTH domain-containing protein 1 isoform X1	6.27651	1.27232e-05	0.159324	0	2	14	6.5	0.89447	78
NPR1	8469.XP_007067906.1	Natriuretic peptide receptor 1; The sequence of the model RefSeq protein was modified relative to its source genomic sequence to represent the inferred complete CDS: substituted 1 base at 1 genomic stop codon	7.22869	0.000126916	0.138338	0	2	15	7	0.875426	17640
PSMD14	8469.XP_007056711.1	26S proteasome non-ATPase regulatory subunit 14 isoform X1	6.42827	0.000900929	0.155563	0.5	4	13	4.25	0.891435	4296
RTN3	8469.XP_007070386.1	Reticulon-3 isoform X1	0	0	0	0	0	0	0	Infinity	0
CCDC150	8469.XP_007071941.1	Coiled-coil domain-containing protein 150 isoform X1	0	0	0	0	0	0	0	Infinity	0
DPEP2	8469.XP_007072700.1	Dipeptidase; The sequence of the model RefSeq protein was modified relative to its source genomic sequence to represent the inferred complete CDS: substituted 1 base at 1 genomic stop codon; Belongs to the metallo-dependent hydrolases superfamily. Peptidase M19 family.	0	0	0	0	0	0	0	Infinity	0
SCN8A	8469.XP_007064764.1	Sodium channel protein; Mediates the voltage-dependent sodium ion permeability of excitable membranes.	0	0	0	0	0	0	0	Infinity	0
HNRNPUL2	8469.XP_007056965.1	Heterogeneous nuclear ribonucleoprotein U-like protein 2	0	0	0	0	0	0	0	Infinity	0
DKC1	8469.XP_007056291.1	H/ACA ribonucleoprotein complex subunit 4; The sequence of the model RefSeq protein was modified relative to its source genomic sequence to represent the inferred complete CDS: inserted 2 bases in 1 codon; substituted 1 base at 1 genomic stop codon	4.46778	0.0209116	0.223825	0.625668	34	11	30.8235	0.930644	221272
RRNAD1	8469.XP_007064690.1	Ribosomal RNA adenine dimethylase domain containing 1; Protein RRNAD1	0	0	0	0	0	0	0	Infinity	0
PDGFRL	8469.XP_007062754.1	Platelet-derived growth factor receptor-like protein	0	0	0	0	0	0	0	Infinity	0
RUNDC3A	8469.XP_007062060.1	RUN domain-containing protein 3A	0	0	0	0	0	0	0	Infinity	0
XP_007053230.1	8469.XP_007053230.1	Serine/threonine-protein kinase LMTK3-like	0	0	0	0	0	0	0	Infinity	0
DIMT1	8469.XP_007055412.1	rRNA adenine N(6)-methyltransferase; Derived by automated computational analysis using gene prediction method: Gnomon. Supporting evidence includes similarity to: 1 EST	4.65904	0.0020928	0.214636	0.896667	25	11	35.96	0.926819	13716
SLC30A2	8469.XP_007070915.1	E3 ubiquitin-protein ligase TRIM63; Zinc transporter 2	0	0	0	0	0	0	0	Infinity	0
SLC30A3	8469.XP_007057582.1	Zinc transporter 3	0	0	0	0	0	0	0	Infinity	0
HFM1	8469.XP_007068826.1	Putative ATP-dependent DNA helicase HFM1; Derived by automated computational analysis using gene prediction method: Gnomon. Supporting evidence includes similarity to: 3 mRNAs	5.37422	0	0.186074	1	2	13	24	0.912516	0
SLC30A9	8469.XP_007069399.1	Solute carrier family 30 member 9; Zinc transporter 9	0	0	0	0	0	0	0	Infinity	0
SCARA3	8469.XP_007071395.1	Scavenger receptor class A member 3	7.52911	0	0.132818	0	1	15	3	0.869418	0
ZBP1	8469.XP_007059919.1	z-DNA-binding protein 1	7.34615	0.00336822	0.136126	0	2	14	2.5	0.873077	10036
KIRREL3	8469.XP_007066425.1	Kin of IRRE-like protein 3; Derived by automated computational analysis using gene prediction method: Gnomon. Supporting evidence includes similarity to: 2 mRNAs	0	0	0	0	0	0	0	Infinity	0
PPFIA2	8469.XP_007069667.1	Liprin-alpha-2-like	0	0	0	0	0	0	0	Infinity	0
RGS9	8469.XP_007055189.1	Regulator of G-protein signaling 9	1.66667	0	0.6	0	1	2	3	0.777778	0
SBF1	8469.XP_007066838.1	Myotubularin-related protein 5; Belongs to the protein-tyrosine phosphatase family. Non-receptor class myotubularin subfamily.	0	0	0	0	0	0	0	Infinity	0
UY3_17148	8469.XP_007070478.1	Zinc finger and SCAN domain-containing protein 2-like	0	0	0	0	0	0	0	Infinity	0
XP_007059324.1	8469.XP_007059324.1	Uncharacterized protein C16orf46 homolog	0	0	0	0	0	0	0	Infinity	0
UY3_17911	8469.XP_007071245.1	Solute carrier organic anion transporter family member 1C1-like	0	0	0	0	0	0	0	Infinity	0
CCND1	8469.XP_007068004.1	G1/S-specific cyclin-D1; Belongs to the cyclin family.	4.53742	0.0245459	0.220389	0.282051	13	11	16	0.929252	229458
RGS3	8469.XP_007064586.1	Regulator of G-protein signaling 3	0	0	0	0	0	0	0	Infinity	0
PHRF1	8469.XP_007060960.1	PHD and RING finger domain-containing protein 1 isoform X1	0	0	0	0	0	0	0	Infinity	0
XP_007071925.1	8469.XP_007071925.1	Aldehyde oxidase 1-like	6.34304	0.0287664	0.157653	0.214286	8	14	4.25	0.893139	148494
XP_007066666.1	8469.XP_007066666.1	Collagen alpha-1(XII) chain-like	0	0	0	0	0	0	0	Infinity	0
RTKN	8469.XP_007072445.1	Rhotekin	0	0	0	0	0	0	0	Infinity	0
SCARB1	8469.XP_007069671.1	Scavenger receptor class B member 1	6.35863	0	0.157267	0	1	14	4	0.892827	0
DCLRE1B	8469.XP_007059658.1	5' exonuclease Apollo	5.69231	0.002079	0.175676	0.5	4	12	8.25	0.906154	17262
ENGASE	8469.XP_007069144.1	Cytosolic endo-beta-N-acetylglucosaminidase; Derived by automated computational analysis using gene prediction method: Gnomon. Supporting evidence includes similarity to: 6 Proteins	0	0	0	0	0	0	0	Infinity	0
SPC25	8469.XP_007056663.1	Kinetochore protein Spc25	4.77443	0.000328449	0.209449	0.6	10	12	26.6	0.924511	4776
TARDBP	8469.XP_007053771.1	TAR DNA-binding protein 43	5.46674	0.000791033	0.182925	0.777778	9	14	13.2222	0.910665	6610
STK17B	8469.XP_007071943.1	Serine/threonine-protein kinase 17B; The sequence of the model RefSeq protein was modified relative to its source genomic sequence to represent the inferred complete CDS: substituted 1 base at 1 genomic stop codon	0	0	0	0	0	0	0	Infinity	0
NEDD4	8469.XP_007056437.1	Neural precursor cell expressed	0	0	0	0	0	0	0	Infinity	0
KIF26B	8469.XP_007058051.1	Kinesin family member 26B; The sequence of the model RefSeq protein was modified relative to its source genomic sequence to represent the inferred complete CDS: inserted 2 bases in 1 codon	0	0	0	0	0	0	0	Infinity	0
DPY19L4	8469.XP_007067770.1	Protein dpy-19 like protein 4; Probable C-mannosyltransferase DPY19L4	0	0	0	0	0	0	0	Infinity	0
KIF26A	8469.XP_007068077.1	Kinesin-like protein KIF26A; Belongs to the TRAFAC class myosin-kinesin ATPase superfamily. Kinesin family.	0	0	0	0	0	0	0	Infinity	0
XP_007061062.1	8469.XP_007061062.1	UPF0691 protein C9orf116 homolog	0	0	0	0	0	0	0	Infinity	0
PLEKHA8	8469.XP_007053333.1	Pleckstrin like proteiny domain-containing family A member 8; The sequence of the model RefSeq protein was modified relative to its source genomic sequence to represent the inferred complete CDS: inserted 1 base in 1 codon	6.53638	0	0.15299	0	1	14	8	0.889272	0
PLEKHA7	8469.XP_007057191.1	Pleckstrin homology domain-containing family A member 7	0	0	0	0	0	0	0	Infinity	0
NPM3	8469.XP_007070521.1	Nucleoplasmin-3	0	0	0	0	0	0	0	Infinity	0
RSRC2	8469.XP_007058367.1	Arginine/serine-rich coiled-coil protein 2; The sequence of the model RefSeq protein was modified relative to its source genomic sequence to represent the inferred complete CDS: substituted 3 bases at 3 genomic stop codons	6.19439	0.002079	0.161436	0	2	14	5	0.896112	9882
PLEKHA3	8469.XP_007069835.1	Pleckstrin homology domain-containing family A member 3	0	0	0	0	0	0	0	Infinity	0
CRYBB2	8469.XP_007058409.1	Beta-crystallin B2; Belongs to the beta/gamma-crystallin family.	0	0	0	0	0	0	0	Infinity	0
PLEKHA6	8469.XP_007065223.1	Pleckstrin like proteiny domain-containing family A member 6; The sequence of the model RefSeq protein was modified relative to its source genomic sequence to represent the inferred complete CDS: inserted 1 base in 1 codon	1	0	1	0	1	1	1	1	0
CRIPT	8469.XP_007062867.1	CXXC repeat containing interactor of PDZ3 domain; Cysteine-rich PDZ-binding protein	0	0	0	0	0	0	0	Infinity	0
RPA1	8469.XP_007057758.1	Replication protein A subunit; As part of the heterotrimeric replication protein A complex (RPA/RP-A)	4.53326	0.0133932	0.220592	0.296296	27	11	17.7778	0.929335	101314
PLEKHA5	8469.XP_007071240.1	Pleckstrin homology domain-containing family A member 5	0	0	0	0	0	0	0	Infinity	0
CRYBB1	8469.XP_007058414.1	Beta-crystallin B1; Belongs to the beta/gamma-crystallin family.	0	0	0	0	0	0	0	Infinity	0
YIPF2	8469.XP_007055942.1	Yip1 domain family member 2; Protein YIPF2	0	0	0	0	0	0	0	Infinity	0
NPM1	8469.XP_007071528.1	Nucleophosmin isoform X1	5.12786	0	0.195013	0	1	11	32	0.917443	0
NPDC1	8469.XP_007066127.1	Neural proliferation differentiation and control protein 1	0	0	0	0	0	0	0	Infinity	0
HSF1	8469.XP_007068913.1	Heat shock factor protein 1	6.73493	0	0.14848	0	1	14	3	0.885301	0
PGRMC2	8469.XP_007059215.1	Membrane-associated progesterone receptor component 2; Belongs to the cytochrome b5 family.	4.47368	0	0.223529	0	1	8	3	0.131579	0
XP_007065084.1	8469.XP_007065084.1	Ovomucoid-like	0	0	0	0	0	0	0	Infinity	0
ARVCF	8469.XP_007055008.1	Armadillo repeat protein deleted in velo-cardio-facial syndrome like protein; Derived by automated computational analysis using gene prediction method: Gnomon. Supporting evidence includes similarity to: 5 ESTs	0	0	0	0	0	0	0	Infinity	0
CPN1	8469.XP_007059144.1	Carboxypeptidase N catalytic chain	1	0	1	0	1	1	1	1	0
UY3_12111	8469.XP_007065336.1	Histone acetyltransferase MYST4; Derived by automated computational analysis using gene prediction method: Gnomon. Supporting evidence includes similarity to: 1 mRNA	1	0	1	0	1	1	1	1	0
UY3_07451	8469.XP_007060312.1	Relaxin receptor 1-like	0	0	0	0	0	0	0	Infinity	0
GREB1L	8469.XP_007057063.1	GREB1-like protein	0	0	0	0	0	0	0	Infinity	0
CRYBA2	8469.XP_007060498.1	Beta-crystallin A2; Belongs to the beta/gamma-crystallin family.	0	0	0	0	0	0	0	Infinity	0
HEATR1	8469.XP_007069065.1	HEAT repeat-containing protein 1; The sequence of the model RefSeq protein was modified relative to its source genomic sequence to represent the inferred complete CDS: substituted 1 base at 1 genomic stop codon	4.36902	0.0185628	0.228884	0.634921	36	11	30.3333	0.93262	174062
STX17	8469.XP_007061880.1	Syntaxin-17	5.68399	0.0267258	0.175933	0.3	5	12	6.8	0.90632	178402
UY3_17130	8469.XP_007070416.1	Chaperone activity of bc1 complex-like	8.59044	0	0.116409	0	1	15	5	0.848191	0
RAMP3	8469.XP_007061418.1	Receptor activity-modifying protein 3; The sequence of the model RefSeq protein was modified relative to its source genomic sequence to represent the inferred complete CDS: deleted 2 bases in 1 codon; substituted 1 base at 1 genomic stop codon	5.55405	0.00622403	0.180049	0.333333	3	13	3	0.908919	19980
RAMP2	8469.XP_007054800.1	Receptor activity-modifying protein 2	6.55094	0	0.15265	1	2	14	3	0.888981	0
UY3_08226	8469.XP_007061172.1	Coiled-coil domain-containing protein 180-like	0	0	0	0	0	0	0	Infinity	0
KIF27	8469.XP_007065588.1	Kinesin-like protein KIF27; Belongs to the TRAFAC class myosin-kinesin ATPase superfamily. Kinesin family.	0	0	0	0	0	0	0	Infinity	0
FKBP4	8469.XP_007055741.1	Peptidylprolyl isomerase; The sequence of the model RefSeq protein was modified relative to its source genomic sequence to represent the inferred complete CDS: substituted 1 base at 1 genomic stop codon	5.03846	0.00460988	0.198473	0	2	11	9.5	0.919231	29086
SORCS2	8469.XP_007056570.1	VPS10 domain-containing receptor SorCS2; Derived by automated computational analysis using gene prediction method: Gnomon. Supporting evidence includes similarity to: 2 mRNAs	0	0	0	0	0	0	0	Infinity	0
ANO5	8469.XP_007068042.1	Anoctamin-5	0	0	0	0	0	0	0	Infinity	0
MRPS7	8469.XP_007072666.1	28S ribosomal protein S7	4.46362	0.0208711	0.224034	0.371795	40	12	22.075	0.930728	237486
ANO4	8469.XP_007069347.1	Anoctamin 4; Derived by automated computational analysis using gene prediction method: Gnomon. Supporting evidence includes similarity to: 25 Proteins	0	0	0	0	0	0	0	Infinity	0
XP_007071848.1	8469.XP_007071848.1	Kinesin-like protein KIF22-like	4.84096	0.000123621	0.206571	0.75	8	12	26.375	0.923181	2042
KIF23	8469.XP_007059571.1	Kinesin-like protein KIF23; Belongs to the TRAFAC class myosin-kinesin ATPase superfamily. Kinesin family.	4.72037	0.000398375	0.211848	0.676471	17	12	23.7647	0.925593	6240
COMMD3	8469.XP_007058569.1	COMM domain-containing protein 3	1	0	1	0	1	1	1	1	0
ANO8	8469.XP_007072219.1	Anoctamin-8	0	0	0	0	0	0	0	Infinity	0
CCDC113	8469.XP_007063342.1	The sequence of the model RefSeq protein was modified relative to its source genomic sequence to represent the inferred complete CDS: substituted 1 base at 1 genomic stop codon	1	0	1	0	1	1	1	1	0
CCDC114	8469.XP_007070689.1	Coiled-coil domain-containing protein 114	6.97297	0.0041818	0.143411	0.3	5	13	4.4	0.880541	20120
MMD	8469.XP_007055184.1	Monocyte to macrophage differentiation factor	0	0	0	0	0	0	0	Infinity	0
STARD3NL	8469.XP_007065961.1	MLN64 N-terminal domain like protein; The sequence of the model RefSeq protein was modified relative to its source genomic sequence to represent the inferred complete CDS: substituted 1 base at 1 genomic stop codon	1	1	1	0	2	1	1	1	2
MME	8469.XP_007057425.1	Membrane metalloendopeptidase; Derived by automated computational analysis using gene prediction method: Gnomon. Supporting evidence includes similarity to: 1 mRNA	0	0	0	0	0	0	0	Infinity	0
SEC13	8469.XP_007060002.1	SEC13 homolog	5.65177	0.0155351	0.176936	0.2	11	12	6.81818	0.906965	95608
ANKDD1A	8469.XP_007053570.1	Ankyrin repeat and death domain-containing protein 1A; Derived by automated computational analysis using gene prediction method: Gnomon. Supporting evidence includes similarity to: 2 mRNAs	1	0	1	0	1	1	1	1	0
CCT3	8469.XP_007064678.1	T-complex protein 1 subunit gamma; Belongs to the TCP-1 chaperonin family.	4.43971	0.0478692	0.22524	0.133333	10	12	14.1	0.931206	319622
CTSC	8469.XP_007063194.1	Dipeptidyl peptidase 1; Belongs to the peptidase C1 family.	0	0	0	0	0	0	0	Infinity	0
UY3_03624	8469.XP_007056283.1	Serine/threonine-protein kinase WNK2-like	1.66667	0	0.6	0	1	2	3	0.777778	0
CD36	8469.XP_007060876.1	Platelet glycoprotein 4; The sequence of the model RefSeq protein was modified relative to its source genomic sequence to represent the inferred complete CDS: substituted 1 base at 1 genomic stop codon; Belongs to the CD36 family.	0	0	0	0	0	0	0	Infinity	0
ARIH1	8469.XP_007056523.1	E3 ubiquitin-protein ligase ARIH1	0	0	0	0	0	0	0	Infinity	0
IDS	8469.XP_007060152.1	Iduronate 2-sulfatase; Derived by automated computational analysis using gene prediction method: Gnomon. Supporting evidence includes similarity to: 1 mRNA	3.52632	0.105263	0.283582	0.333333	3	7	2.66667	0.368421	36
DHX16	8469.XP_007068299.1	Putative pre-mRNA-splicing factor ATP-dependent RNA helicase DHX16; The sequence of the model RefSeq protein was modified relative to its source genomic sequence to represent the inferred complete CDS: inserted 1 base in 1 codon; deleted 1 base in 1 codon	5.11435	0.000197162	0.195528	0.545455	12	13	18.0833	0.917713	2204
CTSH	8469.XP_007059608.1	Pro-cathepsin H; Belongs to the peptidase C1 family.	0	0	0	0	0	0	0	Infinity	0
XP_007054666.1	8469.XP_007054666.1	Antigen WC1.1-like	0	0	0	0	0	0	0	Infinity	0
DHX15	8469.XP_007058172.1	Putative pre-mRNA-splicing factor ATP-dependent RNA helicase DHX15	4.44802	0.0250373	0.224819	0.448316	42	11	27.9286	0.93104	235434
REV3L	8469.XP_007057524.1	DNA polymerase zeta catalytic subunit; The sequence of the model RefSeq protein was modified relative to its source genomic sequence to represent the inferred complete CDS: deleted 1 base in 1 codon	4.82432	0.00319979	0.207283	0.472527	14	11	19.9286	0.923514	26518
HYAL2	8469.XP_007061891.1	Hyaluronoglucosaminidase; Hyaluronidase-2	0	0	0	0	0	0	0	Infinity	0
KIF19	8469.XP_007056137.1	Kinesin-like protein KIF19	0	0	0	0	0	0	0	Infinity	0
BABAM1	8469.XP_007072115.1	BRISC and BRCA1-A complex member 1 isoform X1	4.81289	0.00355704	0.207775	0	2	12	20	0.923742	42298
PTPRG	8469.XP_007066007.1	Receptor-type tyrosine-protein phosphatase gamma	8.59252	0	0.11638	0	1	15	4	0.84815	0
PTPRF	8469.XP_007061575.1	Receptor-type tyrosine-protein phosphatase F	0	0	0	0	0	0	0	Infinity	0
LARP1B	8469.XP_007059221.1	La ribonucleoprotein domain family member 1B; The sequence of the model RefSeq protein was modified relative to its source genomic sequence to represent the inferred complete CDS: substituted 1 base at 1 genomic stop codon	5.13617	0.000727864	0.194697	0	2	12	25	0.917277	6274
BRCA2	8469.XP_007066044.1	Breast cancer type 2 susceptibility protein	4.74844	0.025973	0.210595	0.352381	15	11	15.1333	0.925031	215252
BMI1	8469.XP_007058533.1	Polycomb complex protein BMI-1	1.5	0	0.666667	0	1	2	2	0.75	0
PEPD	8469.XP_007058736.1	xaa-Pro dipeptidase	2.71429	0	0.368421	1	2	5	2.5	0.428571	0
IKBKAP	8469.XP_007057994.1	Elongator complex protein 1; Acts as subunit of the RNA polymerase II elongator complex	4.61435	0.0208775	0.216715	0.52381	7	11	33.1429	0.927713	230590
BRCA1	8469.XP_007054809.1	Breast cancer type 1 susceptibility protein homolog	4.3264	0.054375	0.231139	0.284585	23	11	16	0.933472	318264
KIF11	8469.XP_007053072.1	Kinesin-like protein KIF11; Belongs to the TRAFAC class myosin-kinesin ATPase superfamily. Kinesin family.	4.42723	0.0493936	0.225875	0.264264	37	12	16.3514	0.931455	414036
AATK	8469.XP_007056132.1	Serine/threonine-protein kinase LMTK1; The sequence of the model RefSeq protein was modified relative to its source genomic sequence to represent the inferred complete CDS: substituted 1 base at 1 genomic stop codon	0	0	0	0	0	0	0	Infinity	0
SLC7A14	8469.XP_007055551.1	Putative cationic amino acid transporter; Derived by automated computational analysis using gene prediction method: Gnomon. Supporting evidence includes similarity to: 39 Proteins	0	0	0	0	0	0	0	Infinity	0
GPAA1	8469.XP_007072403.1	Glycosylphosphatidylinositol anchor attachment 1 protein; The sequence of the model RefSeq protein was modified relative to its source genomic sequence to represent the inferred complete CDS: substituted 1 base at 1 genomic stop codon	2	0	0.5	0	1	3	2	0.5	0
CCDC126	8469.XP_007066228.1	Coiled-coil domain-containing protein 126	0	0	0	0	0	0	0	Infinity	0
USPL1	8469.XP_007064839.1	Ubiquitin-specific peptidase-like protein 1; SUMO-specific isopeptidase USPL1	5.84615	0.002079	0.171053	0	2	13	10.5	0.903077	12752
CD40	8469.XP_007067808.1	CD40 molecule; Tumor necrosis factor receptor superfamily member 5	6.78067	0.00108541	0.147478	0	2	13	5.5	0.884387	6164
FKBP10	8469.XP_007054776.1	Peptidyl-prolyl cis-trans isomerase FKBP10	1	0.5	1	0.5	4	1	2.5	1	6
SCN2B	8469.XP_007062442.1	Sodium channel subunit beta-2	0	0	0	0	0	0	0	Infinity	0
RGL1	8469.XP_007061193.1	Ral guanine nucleotide dissociation stimulator-like 1	5.94283	0.002079	0.16827	0	2	12	6	0.901143	11888
INTS7	8469.XP_007058071.1	Integrator complex subunit 7 isoform X1	1.66667	0	0.6	0	1	2	3	0.777778	0
WNK2	8469.XP_007068282.1	Serine/threonine-protein kinase WNK2	1.66667	0	0.6	0	1	2	3	0.777778	0
WNK1	8469.XP_007070862.1	WNK lysine deficient protein kinase 1; The sequence of the model RefSeq protein was modified relative to its source genomic sequence to represent the inferred complete CDS: inserted 2 bases in 1 codon	1	1	1	0	3	1	1	1	6
ARTN	8469.XP_007061595.1	Artemin	0	0	0	0	0	0	0	Infinity	0
TG	8469.XP_007066827.1	Thyroglobulin	3.57143	0	0.28	0	1	6	2	0.142857	0
ICK	8469.XP_007055120.1	Intestinal cell kinase; Serine/threonine-protein kinase ICK	0	0	0	0	0	0	0	Infinity	0
MYLPF	8469.XP_007071204.1	Myosin regulatory light chain 2	1	0	1	0	1	1	1	1	0
IQSEC3	8469.XP_007070855.1	IQ motif and SEC7 domain-containing protein 3; Derived by automated computational analysis using gene prediction method: Gnomon. Supporting evidence includes similarity to: 3 mRNAs	8.38565	0	0.119251	0	1	17	4	0.852287	0
XRCC2	8469.XP_007059484.1	X-ray repair cross complementing 2; DNA repair protein XRCC2	5.67048	0	0.176352	1	2	12	14.5	0.90659	0
RCC2	8469.XP_007069353.1	Regulator of chromosome condensation 2; Protein RCC2	0	0	0	0	0	0	0	Infinity	0
SURF2	8469.XP_007061170.1	Surfeit locus protein 2	0	0	0	0	0	0	0	Infinity	0
LRRN2	8469.XP_007065178.1	Leucine-rich repeat neuronal protein 2; Derived by automated computational analysis using gene prediction method: Gnomon. Supporting evidence includes similarity to: 1 mRNA	1	0	1	0	1	1	1	1	0
INTS1	8469.XP_007065418.1	Integrator complex subunit 1; Derived by automated computational analysis using gene prediction method: Gnomon. Supporting evidence includes similarity to: 1 mRNA	1	1	1	0	3	1	1	1	6
CRADD	8469.XP_007069293.1	Death domain-containing protein CRADD	6.65904	0.00552595	0.150172	0.333333	3	13	3.66667	0.886819	37194
LRRN3	8469.XP_007071027.1	Leucine-rich repeat neuronal protein 3	0	0	0	0	0	0	0	Infinity	0
TMEM86A	8469.XP_007068983.1	Lysoplasmalogenase-like protein TMEM86A; Derived by automated computational analysis using gene prediction method: Gnomon. Supporting evidence includes similarity to: 1 mRNA	0	0	0	0	0	0	0	Infinity	0
CLHC1	8469.XP_007070120.1	Clathrin heavy chain linker domain-containing protein 1	7.38981	0	0.135321	0	1	15	3	0.872204	0
SEC31B	8469.XP_007072328.1	Protein transport protein Sec31B	6.32225	0	0.158172	1	2	13	8.5	0.893555	0
SNX8	8469.XP_007065443.1	Sorting nexin-8	0	0	0	0	0	0	0	Infinity	0
RIMKLB	8469.XP_007055681.1	Beta-citryl-glutamate synthase B	0	0	0	0	0	0	0	Infinity	0
ZBED6	8469.XP_007065187.1	Zinc finger BED domain-containing protein 6	6.48753	0	0.154142	0	1	12	11	0.890249	0
SNX7	8469.XP_007062658.1	Sorting nexin-7	0	0	0	0	0	0	0	Infinity	0
DHX38	8469.XP_007062500.1	Pre-mRNA-splicing factor ATP-dependent RNA helicase PRP16; Derived by automated computational analysis using gene prediction method: Gnomon. Supporting evidence includes similarity to: 1 mRNA	4.57588	0.00659762	0.218537	0.390476	15	12	20.5333	0.928482	95842
ARSI	8469.XP_007071588.1	Arylsulfatase I	0	0	0	0	0	0	0	Infinity	0
HIVEP1	8469.XP_007070606.1	Zinc finger protein 40	1	0	1	0	1	1	1	1	0
PENK	8469.XP_007054570.1	proenkephalin-A	0	0	0	0	0	0	0	Infinity	0
PCBP2	8469.XP_007065844.1	poly(rC)-binding protein 2 isoform X1	6.46362	0	0.154712	0	1	15	17	0.890728	0
MIER2	8469.XP_007072264.1	Mesoderm induction early response protein 2	7.19335	0	0.139017	0	1	15	2	0.876133	0
MICAL1	8469.XP_007063607.1	Microtubule associated monooxygenase	0	0	0	0	0	0	0	Infinity	0
ZNF706	8469.XP_007069002.1	The sequence of the model RefSeq protein was modified relative to its source genomic sequence to represent the inferred complete CDS: inserted 1 base in 1 codon	0	0	0	0	0	0	0	Infinity	0
RAB11FIP1	8469.XP_007053542.1	Rab11 family-interacting protein 1	6.96154	0	0.143646	0	1	15	3	0.880769	0
COMMD8	8469.XP_007071084.1	COMM domain-containing protein 8	1	0	1	0	1	1	1	1	0
SNX4	8469.XP_007057115.1	Sorting nexin-4	0	0	0	0	0	0	0	Infinity	0
APH1A	8469.XP_007068194.1	Gamma-secretase subunit APH-1A	9.3815	0	0.106593	0	1	17	2	0.83237	0
PCDH18	8469.XP_007063789.1	Protocadherin-18 isoform X1	0	0	0	0	0	0	0	Infinity	0
MST1R	8469.XP_007052745.1	Macrophage-stimulating protein receptor; The sequence of the model RefSeq protein was modified relative to its source genomic sequence to represent the inferred complete CDS: inserted 2 bases in 1 codon	0	0	0	0	0	0	0	Infinity	0
UY3_15773	8469.XP_007069060.1	Thioredoxin domain-containing protein 9; Lysozyme g-like	0	0	0	0	0	0	0	Infinity	0
WNK4	8469.XP_007054841.1	Amine oxidase; Serine/threonine-protein kinase WNK4	0	0	0	0	0	0	0	Infinity	0
PCDH15	8469.XP_007071659.1	Protocadherin-15	7.19127	0.00587444	0.139058	0.333333	4	15	3.25	0.876175	44296
PEX11A	8469.XP_007066915.1	Peroxisomal biogenesis factor 11 alpha; Peroxisomal membrane protein 11A isoform X1	6.38773	0	0.15655	1	3	14	4	0.892245	0
CAPSL	8469.XP_007064166.1	Calcyphosin-like protein	0	0	0	0	0	0	0	Infinity	0
PPP1R32	8469.XP_007065830.1	Protein phosphatase 1 regulatory subunit 32	0	0	0	0	0	0	0	Infinity	0
PCDH10	8469.XP_007072704.1	Protocadherin-10; The sequence of the model RefSeq protein was modified relative to its source genomic sequence to represent the inferred complete CDS: substituted 1 base at 1 genomic stop codon	0	0	0	0	0	0	0	Infinity	0
XP_007056777.1	8469.XP_007056777.1	Protein ZBED8-like	0	0	0	0	0	0	0	Infinity	0
GCDH	8469.XP_007058288.1	glutaryl-CoA dehydrogenase	7.21206	0.00120742	0.138657	0.333333	3	15	4.33333	0.875759	8316
UY3_12256	8469.XP_007065447.1	Uncharacterized protein C7orf50 homolog	5.24324	0	0.190722	1	5	12	39.4	0.915135	0
XP_007066641.1	8469.XP_007066641.1	Transcriptional repressor NF-X1-like	0	0	0	0	0	0	0	Infinity	0
CTXN2	8469.XP_007066860.1	Cortexin 2; Derived by automated computational analysis using gene prediction method: Gnomon. Supporting evidence includes similarity to: 5 Proteins	0	0	0	0	0	0	0	Infinity	0
PEX11G	8469.XP_007072176.1	Peroxisomal biogenesis factor 11 gamma; Peroxisomal membrane protein 11C	6.38773	0	0.15655	1	3	14	4	0.892245	0
KIF20B	8469.XP_007071652.1	Kinesin-like protein KIF20B; Belongs to the TRAFAC class myosin-kinesin ATPase superfamily. Kinesin family.	4.87734	0	0.20503	1	3	12	42.3333	0.922453	0
TAGLN2	8469.XP_007066131.1	Transgelin; The sequence of the model RefSeq protein was modified relative to its source genomic sequence to represent the inferred complete CDS: substituted 1 base at 1 genomic stop codon; Belongs to the calponin family.	0	0	0	0	0	0	0	Infinity	0
PPP1R42	8469.XP_007066264.1	Leucine-rich repeat-containing protein 67; Protein phosphatase 1 regulatory subunit 42	4.92204	0.000500311	0.203168	0.625731	19	12	18.8421	0.921559	9032
KDELR2	8469.XP_007060693.1	ER lumen protein-retaining receptor; Derived by automated computational analysis using gene prediction method: Gnomon. Supporting evidence includes similarity to: 1 mRNA	0	0	0	0	0	0	0	Infinity	0
UY3_06796	8469.XP_007059619.1	Vacuolar protein sorting-associated protein 33B; Tubulin polyglutamylase TTLL13-like	5.079	0.0125099	0.196889	0.1	5	13	9.6	0.91842	221832
LACTB2	8469.XP_007054105.1	Lactamase beta 2; Derived by automated computational analysis using gene prediction method: Gnomon. Supporting evidence includes similarity to: 8 Proteins	0	0	0	0	0	0	0	Infinity	0
FNDC1	8469.XP_007059195.1	Fibronectin type III domain-containing protein 1; The sequence of the model RefSeq protein was modified relative to its source genomic sequence to represent the inferred complete CDS: deleted 1 base in 1 codon; substituted 1 base at 1 genomic stop codon	0	0	0	0	0	0	0	Infinity	0
SNTN	8469.XP_007066011.1	Sentan	0	0	0	0	0	0	0	Infinity	0
FNDC9	8469.XP_007058491.1	Fibronectin type III domain-containing protein 9	0	0	0	0	0	0	0	Infinity	0
MMD2	8469.XP_007062817.1	Monocyte to macrophage differentiation factor 2	0	0	0	0	0	0	0	Infinity	0
XP_007062903.1	8469.XP_007062903.1	General transcription factor IIE subunit 2-like	5.06757	0	0.197333	1	7	12	10.7143	0.918649	0
ENTPD7	8469.XP_007059142.1	Ectonucleoside triphosphate diphosphohydrolase 7; Belongs to the GDA1/CD39 NTPase family.	1	0	1	0	1	1	1	1	0
NSMCE1	8469.XP_007063739.1	NSE1 homolog	5.56861	0	0.179578	1	2	13	19	0.908628	0
PAQR3	8469.XP_007069868.1	Progestin and adipoQ receptor family member 3	0	0	0	0	0	0	0	Infinity	0
ENTPD3	8469.XP_007066537.1	60S ribosomal protein L14; Ectonucleoside triphosphate diphosphohydrolase 3; Belongs to the GDA1/CD39 NTPase family.	5.53742	0.0139013	0.180589	0.178571	8	13	7.125	0.909252	189374
PAQR9	8469.XP_007055106.1	Progestin and adipoQ receptor family member 9	0	0	0	0	0	0	0	Infinity	0
ARSA	8469.XP_007066792.1	Arylsulfatase A-like	0	0	0	0	0	0	0	Infinity	0
TMPO	8469.XP_007069299.1	Lamina-associated polypeptide 2	6.21622	0	0.16087	0	1	14	4	0.895676	0
SCN1A	8469.XP_007056678.1	Sodium channel protein; Mediates the voltage-dependent sodium ion permeability of excitable membranes.	0	0	0	0	0	0	0	Infinity	0
CALN1	8469.XP_007054222.1	Calcium-binding protein 8 isoform X1	0	0	0	0	0	0	0	Infinity	0
ACAD10	8469.XP_007058377.1	Acyl-CoA dehydrogenase family member 10; Derived by automated computational analysis using gene prediction method: Gnomon. Supporting evidence includes similarity to: 2 mRNAs	8.74844	0	0.114306	0	1	17	3	0.845031	0
EPHB2	8469.XP_007053185.1	Ephrin type-B receptor 2	4.89917	0	0.204116	1	6	12	29.8333	0.922017	0
CCNL1	8469.XP_007067141.1	Cyclin-L1; Derived by automated computational analysis using gene prediction method: Gnomon. Supporting evidence includes similarity to: 1 mRNA	5.13825	2.50908e-05	0.194619	0.333333	3	12	19.3333	0.917235	318
XP_007060813.1	8469.XP_007060813.1	Uncharacterized protein LOC102934184	0	0	0	0	0	0	0	Infinity	0
UY3_05488	8469.XP_007058224.1	Multidrug resistance-associated protein 1-like	0	0	0	0	0	0	0	Infinity	0
XP_007072031.1	8469.XP_007072031.1	Leucine-rich repeat-containing protein LOC400891-like	0	0	0	0	0	0	0	Infinity	0
KIF21A	8469.XP_007056489.1	Kinesin-like protein KIF21A; Belongs to the TRAFAC class myosin-kinesin ATPase superfamily. Kinesin family.	0	0	0	0	0	0	0	Infinity	0
BCAP29	8469.XP_007065735.1	B-cell receptor-associated protein 29	0	0	0	0	0	0	0	Infinity	0
BAIAP2L1	8469.XP_007065433.1	Brain-specific angiogenesis inhibitor 1-associated protein 2-like protein 1 isoform X1	0	0	0	0	0	0	0	Infinity	0
CCAR2	8469.XP_007068386.1	Uncharacterized protein; Derived by automated computational analysis using gene prediction method: Gnomon. Supporting evidence includes similarity to: 9 Proteins	0	0	0	0	0	0	0	Infinity	0
ARR3	8469.XP_007055341.1	Beta-arrestin-1; Derived by automated computational analysis using gene prediction method: Gnomon. Supporting evidence includes similarity to: 26 Proteins	6.55717	0.00622511	0.152505	0	3	14	2	0.888857	76274
CCNC	8469.XP_007067226.1	cyclin-C	4.85863	0.0019477	0.205819	0.6	5	11	15	0.922827	9484
DNHD1	8469.XP_007066073.1	Dynein heavy chain domain-containing protein 1	1	0	1	0	1	1	1	1	0
ZDHHC5	8469.XP_007068498.1	Palmitoyltransferase ZDHHC5	0	0	0	0	0	0	0	Infinity	0
THUMPD2	8469.XP_007059048.1	THUMP domain-containing protein 2	0	0	0	0	0	0	0	Infinity	0
OGFOD3	8469.XP_007072648.1	Uncharacterized protein; 2-oxoglutarate and iron-dependent oxygenase domain-containing protein 3	0	0	0	0	0	0	0	Infinity	0
KDELR1	8469.XP_007070678.1	ER lumen protein retaining receptor 1	0	0	0	0	0	0	0	Infinity	0
AHCYL1	8469.XP_007063530.1	Adenosylhomocysteinase like 1; Putative adenosylhomocysteinase 2	5.61746	0.00972533	0.178016	0.4	5	12	5	0.907651	37078
AHCYL2	8469.XP_007069852.1	Adenosylhomocysteinase like 2; Putative adenosylhomocysteinase 3	5.62994	0.00158687	0.177622	0.666667	4	12	6	0.907401	12948
UY3_09215	8469.XP_007062187.1	WD repeat-containing protein 52; Uncharacterized protein LOC102948358	0	0	0	0	0	0	0	Infinity	0
EIF4A2	8469.XP_007071059.1	Eukaryotic initiation factor 4A-II isoform X1	4.78586	0.0134479	0.208949	0.0666667	6	12	11.5	0.924283	102126
MURC	8469.XP_007061872.1	Muscle-related coiled-coil protein	0	0	0	0	0	0	0	Infinity	0
PTPN6	8469.XP_007069703.1	Tyrosine-protein phosphatase non-receptor type; The sequence of the model RefSeq protein was modified relative to its source genomic sequence to represent the inferred complete CDS: deleted 1 base in 1 codon; Belongs to the protein-tyrosine phosphatase family. Non-receptor class 2 subfamily.	9.09459	0.00415368	0.109955	0	2	16	2.5	0.838108	26336
PTPN9	8469.XP_007068979.1	Tyrosine-protein phosphatase non-receptor type 9	1	0	1	0	1	1	1	1	0
NOVA2	8469.XP_007071041.1	NOVA alternative splicing regulator 2; RNA-binding protein Nova-2	0	0	0	0	0	0	0	Infinity	0
XP_007057138.1	8469.XP_007057138.1	The sequence of the model RefSeq protein was modified relative to its source genomic sequence to represent the inferred complete CDS: deleted 1 base in 1 codon	0	0	0	0	0	0	0	Infinity	0
SLC25A39	8469.XP_007062059.1	Solute carrier family 25 member 39	0	0	0	0	0	0	0	Infinity	0
SLC25A37	8469.XP_007065563.1	Solute carrier family 25 member 37; The sequence of the model RefSeq protein was modified relative to its source genomic sequence to represent the inferred complete CDS: inserted 1 base in 1 codon	0	0	0	0	0	0	0	Infinity	0
SLC25A38	8469.XP_007070741.1	Solute carrier family 25 member 38; Mitochondrial carrier required during erythropoiesis. Probably involved in the biosynthesis of heme	1.5	0.5	0.666667	0	2	2	2	0.833333	6
BAIAP2	8469.XP_007056112.1	BAI1 associated protein 2; Derived by automated computational analysis using gene prediction method: Gnomon. Supporting evidence includes similarity to: 1 mRNA	6.85759	0.00311309	0.145824	0.5	4	14	3.75	0.882848	28390
NDUFB11	8469.XP_007069635.1	NADH:ubiquinone oxidoreductase subunit B11; NADH dehydrogenase [ubiquinone] 1 beta subcomplex subunit 11	1.33333	0.666667	0.75	0	2	2	1.5	0.833333	4
LYSMD1	8469.XP_007068188.1	LysM domain containing 1; The sequence of the model RefSeq protein was modified relative to its source genomic sequence to represent the inferred complete CDS: substituted 2 bases at 2 genomic stop codons	0	0	0	0	0	0	0	Infinity	0
NICN1	8469.XP_007068356.1	Nicolin-1	2	0	0.5	0	1	3	3	0.666667	0
METAP1D	8469.XP_007056766.1	Methionine aminopeptidase 1D	1.5	0	0.666667	0	1	2	2	0.75	0
CTHRC1	8469.XP_007056172.1	Collagen triple helix repeat-containing protein 1	0	0	0	0	0	0	0	Infinity	0
SH2B1	8469.XP_007072306.1	SH2B adapter protein 1; The sequence of the model RefSeq protein was modified relative to its source genomic sequence to represent the inferred complete CDS: inserted 3 bases in 2 codons	0	0	0	0	0	0	0	Infinity	0
SLC25A22	8469.XP_007060955.1	Mitochondrial glutamate carrier 1; Belongs to the mitochondrial carrier (TC 2.A.29) family.	0	0	0	0	0	0	0	Infinity	0
UY3_17404	8469.XP_007070719.1	Putative zinc finger protein 724-like	0	0	0	0	0	0	0	Infinity	0
MICALCL	8469.XP_007058770.1	MICAL C-terminal-like protein	0	0	0	0	0	0	0	Infinity	0
D2HGDH	8469.XP_007067458.1	D-2-hydroxyglutarate dehydrogenase; The sequence of the model RefSeq protein was modified relative to its source genomic sequence to represent the inferred complete CDS: substituted 2 bases at 2 genomic stop codons	8.18087	2.16337e-06	0.122236	0	2	16	3.5	0.856383	4
LRRC8A	8469.XP_007061143.1	Leucine-rich repeat-containing protein 8A; Derived by automated computational analysis using gene prediction method: Gnomon. Supporting evidence includes similarity to: 1 mRNA	1	0	1	0	1	1	1	1	0
FCHO2	8469.XP_007059299.1	FCH domain only protein 2	7.33576	0	0.136319	1	2	15	4.5	0.873285	0
UY3_06721	8469.XP_007059514.1	Protocadherin-11 X-linked-like isoform X1	0	0	0	0	0	0	0	Infinity	0
KIAA1324	8469.XP_007072678.1	UPF0577 protein KIAA1324 homolog isoform X1	0	0	0	0	0	0	0	Infinity	0
FCHO1	8469.XP_007072228.1	FCH domain only protein 1; The sequence of the model RefSeq protein was modified relative to its source genomic sequence to represent the inferred complete CDS: substituted 1 base at 1 genomic stop codon	7.33576	0	0.136319	1	2	15	4.5	0.873285	0
SH3BP1	8469.XP_007062691.1	SH3 domain-binding protein 1	6.08316	0	0.164388	0	1	13	6	0.898337	0
PTPRZ1	8469.XP_007053187.1	Receptor-type tyrosine-protein phosphatase zeta	0	0	0	0	0	0	0	Infinity	0
CNNM1	8469.XP_007072703.1	Cyclin and CBS domain divalent metal cation transport mediator 1; The sequence of the model RefSeq protein was modified relative to its source genomic sequence to represent the inferred complete CDS: substituted 1 base at 1 genomic stop codon	0	0	0	0	0	0	0	Infinity	0
SLC25A28	8469.XP_007059141.1	Mitoferrin-2; Belongs to the mitochondrial carrier (TC 2.A.29) family.	0	0	0	0	0	0	0	Infinity	0
XP_007061156.1	8469.XP_007061156.1	Carboxyl-terminal PDZ ligand of neuronal nitric oxide synthase protein-like	0	0	0	0	0	0	0	Infinity	0
SLC25A29	8469.XP_007065020.1	Mitochondrial carnitine/acylcarnitine carrier protein CACL; Belongs to the mitochondrial carrier (TC 2.A.29) family.	0	0	0	0	0	0	0	Infinity	0
UY3_00226	8469.XP_007052789.1	Polycystin-1-like	0	0	0	0	0	0	0	Infinity	0
USH1C	8469.XP_007057186.1	Harmonin	7.17464	0.00502325	0.13938	0.333333	4	14	3.25	0.876507	13148
PPM1H	8469.XP_007064068.1	Protein phosphatase 1H	0	0	0	0	0	0	0	Infinity	0
ZBTB48	8469.XP_007060387.1	Zinc finger and BTB domain-containing protein 48	6.69127	0	0.149449	0	1	13	4	0.886175	0
ZBTB49	8469.XP_007063010.1	Zinc finger and BTB domain-containing protein 49	0	0	0	0	0	0	0	Infinity	0
ZBTB46	8469.XP_007062581.1	Zinc finger and BTB domain-containing protein 46	0	0	0	0	0	0	0	Infinity	0
GTF3C5	8469.XP_007061090.1	General transcription factor 3C polypeptide 5	7.75676	0.0124286	0.12892	0	4	14	2	0.864865	69198
NDUFB6	8469.XP_007065266.1	NADH:ubiquinone oxidoreductase subunit B6; NADH dehydrogenase [ubiquinone] 1 beta subcomplex subunit 6	2	0	0.5	0	1	3	2	0.5	0
PID1	8469.XP_007055099.1	PTB-containing	0	0	0	0	0	0	0	Infinity	0
XP_007059539.1	8469.XP_007059539.1	ALS2 C-terminal-like protein-like	1	0	1	0	1	1	1	1	0
COL15A1	8469.XP_007058963.1	Collagen alpha-1(XV) chain	0	0	0	0	0	0	0	Infinity	0
SEC23A	8469.XP_007065303.1	Protein transport protein Sec23A isoform X1	5.82017	0.0100938	0.171816	0.133333	6	13	4.5	0.903597	104528
GTF3C2	8469.XP_007057581.1	General transcription factor 3C polypeptide 2	8.75572	0	0.114211	0	1	15	4	0.844886	0
SLC47A2	8469.XP_007057805.1	Solute carrier family 47 member 2; The sequence of the model RefSeq protein was modified relative to its source genomic sequence to represent the inferred complete CDS: substituted 1 base at 1 genomic stop codon	0	0	0	0	0	0	0	Infinity	0
SEC22C	8469.XP_007055614.1	Vesicle-trafficking protein SEC22c; Belongs to the synaptobrevin family.	6.53119	0.00113549	0.153112	0	2	13	7	0.889376	21050
AHDC1	8469.XP_007064925.1	AT-hook DNA binding motif containing 1; The sequence of the model RefSeq protein was modified relative to its source genomic sequence to represent the inferred complete CDS: inserted 2 bases in 2 codons	0	0	0	0	0	0	0	Infinity	0
ST6GALNAC5	8469.XP_007062629.1	Alpha-N-acetylgalactosaminide alpha-2	0	0	0	0	0	0	0	Infinity	0
SEC22A	8469.XP_007071947.1	Vesicle-trafficking protein SEC22a; Belongs to the synaptobrevin family.	6.10811	0.0023518	0.163717	0.333333	3	13	6.33333	0.897838	34948
SLC25A10	8469.XP_007063437.1	Solute carrier family 25 member 10; Mitochondrial dicarboxylate carrier	4.51455	0.0801084	0.221506	0.601732	22	12	24.9091	0.929709	1055878
XP_007068740.1	8469.XP_007068740.1	Translational activator of cytochrome c oxidase 1-like	1	0	1	0	1	1	1	1	0
ZNF638	8469.XP_007064075.1	Zinc finger protein 638	5.29626	0.00101255	0.188813	0.333333	3	13	14.6667	0.914075	6406
ZNF639	8469.XP_007057043.1	The sequence of the model RefSeq protein was modified relative to its source genomic sequence to represent the inferred complete CDS: substituted 1 base at 1 genomic stop codon	1	0	1	0	1	1	1	1	0
SNPH	8469.XP_007062566.1	Syntaphilin; The sequence of the model RefSeq protein was modified relative to its source genomic sequence to represent the inferred complete CDS: substituted 1 base at 1 genomic stop codon	2	0	0.5	0	1	3	2	0.5	0
SLC25A19	8469.XP_007072624.1	Mitochondrial thiamine pyrophosphate carrier; Derived by automated computational analysis using gene prediction method: Gnomon. Supporting evidence includes similarity to: 13 Proteins; Belongs to the mitochondrial carrier (TC 2.A.29) family.	6.57277	0	0.152143	0	1	14	6	0.888545	0
NPC2	8469.XP_007065345.1	Epididymal secretory protein E1	1.5	0	0.666667	0	1	2	2	0.75	0
SLC25A17	8469.XP_007053400.1	Peroxisomal membrane protein PMP34; Belongs to the mitochondrial carrier (TC 2.A.29) family.	5.39293	0.0463908	0.185428	0.3	5	13	8.2	0.912141	249578
PPM1B	8469.XP_007052727.1	Protein phosphatase 1B; Derived by automated computational analysis using gene prediction method: Gnomon. Supporting evidence includes similarity to: 2 ESTs	0	0	0	0	0	0	0	Infinity	0
SLC25A15	8469.XP_007068133.1	Mitochondrial ornithine transporter 1; Belongs to the mitochondrial carrier (TC 2.A.29) family.	0	0	0	0	0	0	0	Infinity	0
SLCO1C1	8469.XP_007071242.1	Solute carrier organic anion transporter family member 1C1 isoform X1	0	0	0	0	0	0	0	Infinity	0
UY3_14117	8469.XP_007067291.1	GRIN2-like protein; Derived by automated computational analysis using gene prediction method: Gnomon. Supporting evidence includes similarity to: 1 mRNA	0	0	0	0	0	0	0	Infinity	0
UY3_00056	8469.XP_007071003.1	Mediator of RNA polymerase II transcription subunit 7; Component of the Mediator complex	5.04054	0.00104965	0.198391	0.571429	7	11	9.14286	0.919189	8224
EMX2	8469.XP_007064285.1	Homeobox protein EMX2	0	0	0	0	0	0	0	Infinity	0
ZNF644	8469.XP_007068823.1	Zinc finger protein 644 isoform X1	0	0	0	0	0	0	0	Infinity	0
UPP1	8469.XP_007061425.1	Uridine phosphorylase; Catalyzes the reversible phosphorylytic cleavage of uridine and deoxyuridine to uracil and ribose- or deoxyribose-1- phosphate. The produced molecules are then utilized as carbon and energy sources or in the rescue of pyrimidine bases for nucleotide synthesis.	7.52911	0.002079	0.132818	0	2	15	1.5	0.869418	12516
XP_007069045.1	8469.XP_007069045.1	Cytoplasmic protein NCK2-like	0	0	0	0	0	0	0	Infinity	0
DSE	8469.XP_007057486.1	Dermatan-sulfate epimerase	2	0.47619	0.5	0	2	3	2.5	0.666667	20
SUMO1	8469.XP_007071911.1	Small ubiquitin-related modifier 1 isoform X1	4.65281	0.0101457	0.214924	0.333333	7	11	8.85714	0.926944	50140
XP_007052943.1	8469.XP_007052943.1	C-type lectin domain family 1 member A-like	0	0	0	0	0	0	0	Infinity	0
EFCAB12	8469.XP_007060068.1	EF-hand calcium-binding domain-containing protein 12	1	0	1	0	1	1	1	1	0
FHL3	8469.XP_007060737.1	Four and a half LIM domains protein 3	1	0	1	0	1	1	1	1	0
FHL1	8469.XP_007068719.1	Four and a half LIM domains protein 1	0	0	0	0	0	0	0	Infinity	0
LRRK2	8469.XP_007056492.1	Leucine-rich repeat serine/threonine-protein kinase 2	8.61123	0.000823862	0.116127	0	2	15	2	0.847775	2088
FLT1	8469.XP_007057952.1	Vascular endothelial growth factor receptor 1	6.12266	0.0190234	0.163328	0	5	13	3.2	0.897547	93826
CNTNAP1	8469.XP_007054839.1	Contactin-associated protein 1	2.55556	0.388889	0.391304	0.333333	3	4	2	0.481481	28
MOXD1	8469.XP_007062306.1	DBH-like monooxygenase protein 1	8.17672	0	0.122298	1	2	16	6	0.856466	0
NFE2L2	8469.XP_007060574.1	Nuclear factor erythroid 2-related factor 2; The sequence of the model RefSeq protein was modified relative to its source genomic sequence to represent the inferred complete CDS: substituted 1 base at 1 genomic stop codon; Belongs to the bZIP family.	4.95114	0.00354515	0.201974	0	3	11	12.3333	0.920977	18044
UY3_18399	8469.XP_007071716.1	Epoxide hydrolase; Biotransformation enzyme that catalyzes the hydrolysis of arene and aliphatic epoxides to less reactive and more water soluble dihydrodiols by the trans addition of water.	1.66667	0	0.6	0	1	2	3	0.777778	0
MYCBPAP	8469.XP_007052827.1	Radical S-adenosyl methionine domain-containing protein 1; The sequence of the model RefSeq protein was modified relative to its source genomic sequence to represent the inferred complete CDS: deleted 1 base in 1 codon	1	0	1	0	1	1	1	1	0
TUBGCP6	8469.XP_007056922.1	Gamma-tubulin complex component 6	5.80146	0.00508691	0.172371	0.333333	4	14	5	0.903971	94314
TUBGCP5	8469.XP_007063269.1	Gamma-tubulin complex component; Gamma-tubulin complex is necessary for microtubule nucleation at the centrosome.	5.92204	0.002079	0.168861	0.333333	3	14	4.33333	0.901559	24764
LRIT1	8469.XP_007067301.1	Leucine rich repeat	0	0	0	0	0	0	0	Infinity	0
GGCX	8469.XP_007069927.1	Vitamin K-dependent gamma-carboxylase; The sequence of the model RefSeq protein was modified relative to its source genomic sequence to represent the inferred complete CDS: deleted 1 base in 1 codon	0	0	0	0	0	0	0	Infinity	0
CXCL12	8469.XP_007069627.1	Stromal cell-derived factor 1; The sequence of the model RefSeq protein was modified relative to its source genomic sequence to represent the inferred complete CDS: substituted 1 base at 1 genomic stop codon	6.29314	0	0.158903	0	1	13	4	0.894137	0
LRRC63	8469.XP_007058818.1	Leucine-rich repeat-containing protein 63	0	0	0	0	0	0	0	Infinity	0
ZBTB11	8469.XP_007061697.1	Zinc finger and BTB domain-containing protein 11	0	0	0	0	0	0	0	Infinity	0
FOXN4	8469.XP_007058396.1	Forkhead box protein N4	0	0	0	0	0	0	0	Infinity	0
RBPMS	8469.XP_007062913.1	RNA-binding protein with multiple splicing	0	0	0	0	0	0	0	Infinity	0
BRPF1	8469.XP_007065992.1	Peregrin; Derived by automated computational analysis using gene prediction method: Gnomon. Supporting evidence includes similarity to: 3 ESTs	1	0	1	0	1	1	1	1	0
MYPOP	8469.XP_007071040.1	Myb-related transcription factor	0	0	0	0	0	0	0	Infinity	0
DR1	8469.XP_007058951.1	Down-regulator of transcription 1; Protein Dr1	0	0	0	0	0	0	0	Infinity	0
COL28A1	8469.XP_007063163.1	Collagen alpha-1(XXVIII) chain	0	0	0	0	0	0	0	Infinity	0
SLC38A4	8469.XP_007064051.1	Sodium-coupled neutral amino acid transporter 4 isoform X1	1	0	1	0	1	1	1	1	0
SOCS4	8469.XP_007062759.1	Suppressor of cytokine signaling 4	0	0	0	0	0	0	0	Infinity	0
EVI5	8469.XP_007058942.1	Ecotropic viral integration site 5 protein like protein; Derived by automated computational analysis using gene prediction method: Gnomon. Supporting evidence includes similarity to: 3 ESTs	2.78947	0.502924	0.358491	0.166667	4	6	2.75	0.552632	172
LRRC4C	8469.XP_007061332.1	Leucine-rich repeat-containing protein 4C	1	0	1	0	1	1	1	1	0
HACL1	8469.XP_007053311.1	2-hydroxyacyl-CoA lyase 1; Belongs to the TPP enzyme family.	7.81289	0.00415368	0.127994	0	2	16	2	0.863742	13912
SLC38A9	8469.XP_007053931.1	Putative sodium-coupled neutral amino acid transporter 9; Derived by automated computational analysis using gene prediction method: Gnomon. Supporting evidence includes similarity to: 1 mRNA	6.35967	0.000314395	0.157241	0.666667	3	12	5.33333	0.892807	2476
SLC38A6	8469.XP_007065388.1	Putative sodium-coupled neutral amino acid transporter 6; The sequence of the model RefSeq protein was modified relative to its source genomic sequence to represent the inferred complete CDS: substituted 1 base at 1 genomic stop codon	0	0	0	0	0	0	0	Infinity	0
ZBBX	8469.XP_007055572.1	WD repeat-containing protein 49; Zinc finger B-box domain-containing protein 1; Belongs to the serpin family.	0	0	0	0	0	0	0	Infinity	0
ATG101	8469.XP_007064766.1	Autophagy-related protein 101	5.73285	0.00438751	0.174433	0.2	6	12	4	0.905343	34704
GIMD1	8469.XP_007054541.1	Uncharacterized protein; GTPase IMAP family member GIMD1	0	0	0	0	0	0	0	Infinity	0
STK33	8469.XP_007057166.1	Serine/threonine kinase 33; Derived by automated computational analysis using gene prediction method: Gnomon. Supporting evidence includes similarity to: 1 mRNA	0	0	0	0	0	0	0	Infinity	0
ATXN2	8469.XP_007058375.1	Ataxin-2 isoform X1	5.03119	0.00535633	0.19876	0.1	5	13	7.6	0.919376	25682
ATXN3	8469.XP_007055503.1	Ataxin-3	6.03015	0	0.165833	0	1	14	5	0.899397	0
STK31	8469.XP_007052752.1	Serine/threonine-protein kinase 31	6.09459	0	0.16408	0	1	14	10	0.898108	0
UY3_08512	8469.XP_007061414.1	Uncharacterized protein C7orf57 homolog	0	0	0	0	0	0	0	Infinity	0
NTPCR	8469.XP_007068929.1	Cancer-related nucleoside-triphosphatase	6.25156	0.0142444	0.15996	0.3	5	13	5.4	0.894969	180276
ARL1	8469.XP_007069341.1	ADP-ribosylation factor-like protein 1	9.50832	0	0.105171	0	1	16	3	0.829834	0
TUBGCP2	8469.XP_007057548.1	Gamma-tubulin complex component; Gamma-tubulin complex is necessary for microtubule nucleation at the centrosome.	4.95322	0.0157595	0.201889	0.25	8	13	15.125	0.920936	240734
PEF1	8469.XP_007060823.1	Peflin	0	0	0	0	0	0	0	Infinity	0
ARL6	8469.XP_007057614.1	ADP ribosylation factor like GTPase 6; Derived by automated computational analysis using gene prediction method: Gnomon. Supporting evidence includes similarity to: 2 mRNAs	1	0	1	0	1	1	1	1	0
CPB1	8469.XP_007057454.1	Carboxypeptidase B	0	0	0	0	0	0	0	Infinity	0
RNASEH2B	8469.XP_007072417.1	Ribonuclease H2 subunit B; The sequence of the model RefSeq protein was modified relative to its source genomic sequence to represent the inferred complete CDS: substituted 1 base at 1 genomic stop codon	5.30873	0	0.188369	0	1	12	40	0.913825	0
PFKFB4	8469.XP_007055652.1	6-phosphofructo-2-kinase/fructose-2	7.7422	0	0.129162	0	1	15	2	0.865156	0
LRRC56	8469.XP_007056803.1	Leucine-rich repeat-containing protein 56	0	0	0	0	0	0	0	Infinity	0
RNASEH2C	8469.XP_007056220.1	Ribonuclease H2 subunit C	0	0	0	0	0	0	0	Infinity	0
UY3_14667	8469.XP_007067898.1	S100 calcium-binding protein; Protein MRP-126-like; Belongs to the S-100 family.	0	0	0	0	0	0	0	Infinity	0
FSCN2	8469.XP_007071000.1	Fascin actin-bundling protein 2	0	0	0	0	0	0	0	Infinity	0
ANAPC5	8469.XP_007058350.1	Anaphase-promoting complex subunit 5 isoform X1	5.08108	0.00320654	0.196809	0.6	5	12	12.2	0.918378	21652
ANAPC4	8469.XP_007058162.1	Anaphase-promoting complex subunit 4	4.93659	0.000223219	0.202569	0.666667	7	12	20.5714	0.921268	2364
SLC9A9	8469.XP_007055107.1	Solute carrier family 9 member A9; The sequence of the model RefSeq protein was modified relative to its source genomic sequence to represent the inferred complete CDS: substituted 1 base at 1 genomic stop codon	0	0	0	0	0	0	0	Infinity	0
SLC9A6	8469.XP_007068718.1	Sodium/hydrogen exchanger 6	0	0	0	0	0	0	0	Infinity	0
MAPKAPK3	8469.XP_007061912.1	MAP kinase-activated protein kinase 3; Belongs to the protein kinase superfamily.	0	0	0	0	0	0	0	Infinity	0
OLFM2	8469.XP_007065137.1	Noelin-2	0	0	0	0	0	0	0	Infinity	0
FOXP2	8469.XP_007070595.1	Forkhead box protein P2 isoform X1	0	0	0	0	0	0	0	Infinity	0
FAM227B	8469.XP_007066870.1	Family with sequence similarity 227 member B; Protein FAM227B	0	0	0	0	0	0	0	Infinity	0
UY3_08566	8469.XP_007061467.1	Protein EMSY isoform X1	5.74532	0.002079	0.174055	0	2	12	8	0.905094	15152
TNNI3K	8469.XP_007062622.1	Serine/threonine-protein kinase TNNI3K	1	0	1	0	1	1	1	1	0
UBALD1	8469.XP_007066587.1	UBA-like domain-containing protein 1	0	0	0	0	0	0	0	Infinity	0
XP_007070649.1	8469.XP_007070649.1	Golgi-associated plant pathogenesis-related protein 1-like	0	0	0	0	0	0	0	Infinity	0
CPA3	8469.XP_007057453.1	Mast cell carboxypeptidase A	0	0	0	0	0	0	0	Infinity	0
UY3_06819	8469.XP_007059631.1	Pleckstrin like proteiny domain-containing family A member 7; Uncharacterized protein LOC102943989	0	0	0	0	0	0	0	Infinity	0
SLC16A9	8469.XP_007054895.1	Monocarboxylate transporter 9; Derived by automated computational analysis using gene prediction method: Gnomon. Supporting evidence includes similarity to: 7 Proteins	0	0	0	0	0	0	0	Infinity	0
KPNA4	8469.XP_007063143.1	Importin subunit alpha-3	6.46258	0	0.154737	0	1	13	15	0.890748	0
ZNF207	8469.XP_007055166.1	Zinc finger protein 207	0	0	0	0	0	0	0	Infinity	0
STK16	8469.XP_007068750.1	Serine/threonine-protein kinase 16	2.71429	0	0.368421	1	2	5	2.5	0.428571	0
SESN1	8469.XP_007057468.1	Sestrin-1	7.14241	0	0.140009	0	1	13	5	0.877152	0
RUVBL2	8469.XP_007072525.1	ruvB-like 2	5.36694	0.0407964	0.186326	0.047619	7	12	3.85714	0.912661	304536
STK10	8469.XP_007062412.1	Serine/threonine-protein kinase 10; The sequence of the model RefSeq protein was modified relative to its source genomic sequence to represent the inferred complete CDS: deleted 1 base in 1 codon	0	0	0	0	0	0	0	Infinity	0
FAM228B	8469.XP_007061496.1	Family with sequence similarity 228 member B; The sequence of the model RefSeq protein was modified relative to its source genomic sequence to represent the inferred complete CDS: substituted 1 base at 1 genomic stop codon	0	0	0	0	0	0	0	Infinity	0
TSEN2	8469.XP_007056550.1	tRNA-splicing endonuclease subunit Sen2; Constitutes one of the two catalytic subunit of the tRNA-splicing endonuclease complex	0	0	0	0	0	0	0	Infinity	0
GPR61	8469.XP_007067604.1	Probable G-protein coupled receptor 61	0	0	0	0	0	0	0	Infinity	0
STK19	8469.XP_007053481.1	Serine/threonine kinase 19; The sequence of the model RefSeq protein was modified relative to its source genomic sequence to represent the inferred complete CDS: substituted 1 base at 1 genomic stop codon	0	0	0	0	0	0	0	Infinity	0
LRRC70	8469.XP_007055413.1	Leucine-rich repeat-containing protein 70	0	0	0	0	0	0	0	Infinity	0
XP_007068463.1	8469.XP_007068463.1	Zinc finger protein 282-like	0	0	0	0	0	0	0	Infinity	0
CCNT1	8469.XP_007064769.1	cyclin-T1; Belongs to the cyclin family.	1	0	1	0	1	1	1	1	0
TTLL9	8469.XP_007062594.1	Probable tubulin polyglutamylase TTLL9	0	0	0	0	0	0	0	Infinity	0
UBAP2	8469.XP_007063356.1	Ubiquitin-associated protein 2 isoform X1	6.76819	0.00068577	0.14775	0	2	14	2.5	0.884636	3350
RIMBP2	8469.XP_007055037.1	RIMS-binding protein 2 isoform X1	0	0	0	0	0	0	0	Infinity	0
TTLL1	8469.XP_007061819.1	Probable tubulin polyglutamylase TTLL1	1.25	0.833333	0.8	0	3	2	1.33333	0.916667	10
UY3_00936	8469.XP_007053432.1	C-type lectin domain family 2 member D-like	0	0	0	0	0	0	0	Infinity	0
UY3_00756	8469.XP_007053272.1	Protein TESPA1-like	0	0	0	0	0	0	0	Infinity	0
TTLL4	8469.XP_007060493.1	Tubulin polyglutamylase TTLL4	2.25	0	0.444444	0	1	3	2	0.583333	0
TTLL5	8469.XP_007065337.1	Tubulin tyrosine ligase like 5; Tubulin polyglutamylase TTLL5	7.67152	0	0.130352	1	4	14	5.75	0.86657	0
TMCO6	8469.XP_007059243.1	Transmembrane and coiled-coil domain-containing protein 6	0	0	0	0	0	0	0	Infinity	0
LETM1	8469.XP_007056032.1	LETM1 and EF-hand domain-containing protein 1	2.57143	0.285714	0.388889	0	2	4	1.5	0.47619	12
XP_007053786.1	8469.XP_007053786.1	The sequence of the model RefSeq protein was modified relative to its source genomic sequence to represent the inferred complete CDS: deleted 1 base in 1 codon; substituted 1 base at 1 genomic stop codon	0	0	0	0	0	0	0	Infinity	0
VWA3B	8469.XP_007063408.1	Von Willebrand factor A domain-containing protein 3B	0	0	0	0	0	0	0	Infinity	0
VWA3A	8469.XP_007060686.1	Von Willebrand factor A domain-containing protein 3A	0	0	0	0	0	0	0	Infinity	0
TMEM61	8469.XP_007062256.1	Transmembrane protein 61	0	0	0	0	0	0	0	Infinity	0
SAMD4A	8469.XP_007062762.1	Protein Smaug homolog 1 isoform X1	0	0	0	0	0	0	0	Infinity	0
GSX2	8469.XP_007071102.1	GS homeobox 2	0	0	0	0	0	0	0	Infinity	0
LRRC28	8469.XP_007053584.1	Leucine rich repeat containing 28; The sequence of the model RefSeq protein was modified relative to its source genomic sequence to represent the inferred complete CDS: substituted 1 base at 1 genomic stop codon	0	0	0	0	0	0	0	Infinity	0
UTP3	8469.XP_007065974.1	Something about silencing protein 10	4.53222	0.00939943	0.220642	0.619048	36	11	30.8889	0.929356	104170
GK	8469.XP_007063180.1	Glycerol kinase	0	0	0	0	0	0	0	Infinity	0
CIRH1A	8469.XP_007062522.1	Cirhin	4.56757	0.00132111	0.218935	0.78629	32	11	33.8438	0.928649	32946
UTP6	8469.XP_007055199.1	U3 small nucleolar RNA-associated protein 6 homolog	4.36071	0.0216194	0.229321	0.571951	41	11	29.878	0.932786	203762
EVC2	8469.XP_007063008.1	Limbin	1	0	1	0	1	1	1	1	0
PMS1	8469.XP_007069953.1	PMS1 protein homolog 1	5.23181	0	0.191138	1	2	12	20.5	0.915364	0
DMD	8469.XP_007063171.1	Dystrophin isoform X1	1	0	1	0	1	1	1	1	0
PMS2	8469.XP_007060701.1	Radial spoke head 10 like protein B; The sequence of the model RefSeq protein was modified relative to its source genomic sequence to represent the inferred complete CDS: inserted 1 base in 1 codon	4.8316	3.05688e-05	0.206971	0.8	5	11	23.6	0.923368	1932
XP_007056177.1	8469.XP_007056177.1	Cysteine and histidine-rich domain-containing protein 1-like	1	0	1	0	1	1	1	1	0
GBX2	8469.XP_007058183.1	Homeobox protein GBX-2	0	0	0	0	0	0	0	Infinity	0
TCOF1	8469.XP_007072749.1	Treacle protein; The sequence of the model RefSeq protein was modified relative to its source genomic sequence to represent the inferred complete CDS: substituted 1 base at 1 genomic stop codon	0	0	0	0	0	0	0	Infinity	0
EXTL2	8469.XP_007062675.1	Exostosin-like 2	0	0	0	0	0	0	0	Infinity	0
PSMB4	8469.XP_007068177.1	Proteasome subunit beta type-4	5.52703	0.0122826	0.180929	0.238095	7	12	5	0.909459	72658
GGA2	8469.XP_007058678.1	Golgi associated	7.29106	0.0034887	0.137154	0	2	15	2	0.874179	19494
UY3_18030	8469.XP_007071381.1	Avidin-like	0	0	0	0	0	0	0	Infinity	0
PTGS1	8469.XP_007061154.1	Prostaglandin G/H synthase 1	3.94737	0	0.253333	0	1	6	3	0.263158	0
MRPL55	8469.XP_007055606.1	39S ribosomal protein L55; Derived by automated computational analysis using gene prediction method: Gnomon. Supporting evidence includes similarity to: 13 Proteins	4.9553	0.000366434	0.201804	0.923077	13	13	22.7692	0.920894	16822
CCNDBP1	8469.XP_007067820.1	cyclin-D1-binding protein 1 homolog	0	0	0	0	0	0	0	Infinity	0
ICT1	8469.XP_007065098.1	Mitochondrial ribosomal protein L58; peptidyl-tRNA hydrolase ICT1	4.9106	0.00129686	0.203641	0.721053	20	13	21.6	0.921788	22426
TMEM72	8469.XP_007069621.1	Transmembrane protein 72; The sequence of the model RefSeq protein was modified relative to its source genomic sequence to represent the inferred complete CDS: inserted 1 base in 1 codon	0	0	0	0	0	0	0	Infinity	0
COL11A2	8469.XP_007069619.1	Collagen type XI alpha 2 chain; The sequence of the model RefSeq protein was modified relative to its source genomic sequence to represent the inferred complete CDS: substituted 1 base at 1 genomic stop codon	8.51351	0	0.11746	0	1	15	5	0.84973	0
STAU2	8469.XP_007063632.1	Double-stranded RNA-binding protein Staufen homolog 2 isoform X1	0	0	0	0	0	0	0	Infinity	0
TMEM106A	8469.XP_007054810.1	Transmembrane protein 106A	0	0	0	0	0	0	0	Infinity	0
MDFI	8469.XP_007068964.1	MyoD family inhibitor; Derived by automated computational analysis using gene prediction method: Gnomon. Supporting evidence includes similarity to: 3 Proteins	0	0	0	0	0	0	0	Infinity	0
DLD	8469.XP_007065723.1	Dihydrolipoyl dehydrogenase; Derived by automated computational analysis using gene prediction method: Gnomon. Supporting evidence includes similarity to: 2 mRNAs	6.1289	0.00282332	0.163161	0.333333	3	13	4.33333	0.897422	15304
ZNF236	8469.XP_007054655.1	Zinc finger protein 236	0	0	0	0	0	0	0	Infinity	0
PIGL	8469.XP_007057730.1	Phosphatidylinositol glycan anchor biosynthesis class L; The sequence of the model RefSeq protein was modified relative to its source genomic sequence to represent the inferred complete CDS: deleted 1 base in 1 codon; substituted 1 base at 1 genomic stop codon	1	0	1	0	1	1	1	1	0
PGAM5	8469.XP_007055091.1	Serine/threonine-protein phosphatase PGAM5	9.4262	0	0.106087	0	1	17	2	0.831476	0
CDC42EP1	8469.XP_007062728.1	Cdc42 effector protein 1	0	0	0	0	0	0	0	Infinity	0
F8	8469.XP_007056295.1	Coagulation factor VIII; Derived by automated computational analysis using gene prediction method: Gnomon. Supporting evidence includes similarity to: 2 mRNAs	0	0	0	0	0	0	0	Infinity	0
PSMA6	8469.XP_007065316.1	Proteasome subunit alpha 6; Derived by automated computational analysis using gene prediction method: Gnomon. Supporting evidence includes similarity to: 4 mRNAs	6.08212	0.00112197	0.164416	0.5	5	12	5.6	0.898358	6216
PTGR2	8469.XP_007055813.1	Prostaglandin reductase 2 isoform X1	0	0	0	0	0	0	0	Infinity	0
MRPL45	8469.XP_007062091.1	39S ribosomal protein L45	5.14241	1.05116e-05	0.194461	0.956044	14	13	23.7143	0.917152	162
LRRC43	8469.XP_007058433.1	UDP-GlcNAc:betaGal beta-1	0	0	0	0	0	0	0	Infinity	0
NIPA2	8469.XP_007063266.1	Non imprinted in Prader-Willi/Angelman syndrome 2; Magnesium transporter NIPA2 isoform X1	6.921	0	0.144488	0	1	15	3	0.88158	0
EMP2	8469.XP_007053869.1	Epithelial membrane protein 2	0	0	0	0	0	0	0	Infinity	0
RIPK3	8469.XP_007069378.1	Receptor-interacting serine/threonine-protein kinase 3	7.43035	0.00557896	0.134583	0	3	15	2.33333	0.871393	23386
CCDC162P	8469.XP_007057512.1	Coiled-coil domain-containing protein 162-like	0	0	0	0	0	0	0	Infinity	0
LYPLA1	8469.XP_007064178.1	Acyl-protein thioesterase 1	2.47368	0.608187	0.404255	0	3	5	3.33333	0.631579	208
LRRC45	8469.XP_007063422.1	Leucine-rich repeat-containing protein 45	1.33333	0	0.75	1	2	2	2.5	0.888889	0
LYPLA2	8469.XP_007068089.1	Lysophospholipase II; The sequence of the model RefSeq protein was modified relative to its source genomic sequence to represent the inferred complete CDS: substituted 1 base at 1 genomic stop codon	3.21053	0.204678	0.311475	0	3	5	2	0.447368	70
UPF2	8469.XP_007056610.1	Regulator of nonsense transcripts 2; The sequence of the model RefSeq protein was modified relative to its source genomic sequence to represent the inferred complete CDS: deleted 2 bases in 1 codon	4.85863	0.00330388	0.205819	0.166667	4	11	7.25	0.922827	43962
OFD1	8469.XP_007060270.1	OFD1	8.38565	0.0124199	0.119251	0	3	16	2.33333	0.852287	144538
APPL2	8469.XP_007066193.1	DCC-interacting protein 13-beta isoform X1	0	0	0	0	0	0	0	Infinity	0
IKBKE	8469.XP_007065152.1	Inhibitor of nuclear factor kappa-B kinase subunit epsilon	6.7079	0.00462527	0.149078	0	2	13	5	0.885842	14286
NKRF	8469.XP_007060177.1	NF-kappa-B-repressing factor; Belongs to the TRAFAC class TrmE-Era-EngA-EngB-Septin- like GTPase superfamily. Septin GTPase family.	0	0	0	0	0	0	0	Infinity	0
MRPL40	8469.XP_007054995.1	39S ribosomal protein L40	4.81601	0.0104019	0.207641	0.670996	22	13	20.5	0.92368	96554
IKBKB	8469.XP_007064248.1	Inhibitor of nuclear factor kappa-B kinase subunit beta; Derived by automated computational analysis using gene prediction method: Gnomon. Supporting evidence includes similarity to: 7 mRNAs	7.02599	0.00233713	0.142329	0	3	14	2	0.87948	20250
XP_007061801.1	8469.XP_007061801.1	XK-related protein 5-like	0	0	0	0	0	0	0	Infinity	0
LITAF	8469.XP_007058190.1	Lipopolysaccharide-induced tumor necrosis factor-alpha factor homolog	0	0	0	0	0	0	0	Infinity	0
EFCAB7	8469.XP_007063470.1	EF-hand calcium-binding domain-containing protein 7	1	0	1	0	1	1	1	1	0
LRRC6	8469.XP_007066825.1	Leucine rich repeat containing 6; Protein tilB homolog	6.99272	7.16721e-05	0.143006	0.333333	3	13	5.33333	0.880146	500
TMEM51	8469.XP_007067497.1	Transmembrane protein 51	0	0	0	0	0	0	0	Infinity	0
HEXA	8469.XP_007056536.1	Beta-hexosaminidase subunit alpha	9.84615	7.21125e-07	0.101562	0.833333	4	17	5	0.823077	2
PIGP	8469.XP_007068311.1	Phosphatidylinositol N-acetylglucosaminyltransferase subunit P	1	0	1	0	1	1	1	1	0
ATF7IP2	8469.XP_007053875.1	Activating transcription factor 7-interacting protein 2	0	0	0	0	0	0	0	Infinity	0
HEXB	8469.XP_007064575.1	Beta-hexosaminidase subunit beta	9.14449	0.00435493	0.109355	0.5	5	17	4.4	0.83711	125340
PIGT	8469.XP_007057272.1	GPI transamidase component PIG-T	1.33333	0.666667	0.75	0	2	2	1.5	0.833333	4
LRRC34	8469.XP_007055559.1	Leucine-rich repeat-containing protein 34	1	0	1	0	1	1	1	1	0
ARF1	8469.XP_007055604.1	ADP-ribosylation factor 1 isoform X1; Belongs to the small GTPase superfamily. Arf family.	8.21102	0.00159	0.121788	0	2	16	2	0.85578	7334
FERMT3	8469.XP_007070377.1	Fermitin family homolog 3	0	0	0	0	0	0	0	Infinity	0
FAM135A	8469.XP_007070610.1	Family with sequence similarity 135 member A; Protein FAM135A isoform X1	0	0	0	0	0	0	0	Infinity	0
EIF5	8469.XP_007062970.1	Eukaryotic translation initiation factor 5	4.97817	0.00311718	0.200877	0.4	5	12	11.4	0.920437	21866
GRIN3B	8469.XP_007072246.1	Glutamate receptor ionotropic	1	0	1	0	1	1	1	1	0
UCK2	8469.XP_007061241.1	Uridine-cytidine kinase 2; Belongs to the uridine kinase family.	6.53222	0.00415368	0.153087	0	2	14	5	0.889356	25028
MLLT11	8469.XP_007068169.1	Protein AF1q	0	0	0	0	0	0	0	Infinity	0
MRPL22	8469.XP_007058477.1	39S ribosomal protein L22; Derived by automated computational analysis using gene prediction method: Gnomon. Supporting evidence includes similarity to: 1 mRNA	4.57277	0.00286591	0.218686	0.637681	24	12	25.4167	0.928545	57888
MRPL23	8469.XP_007063028.1	39S ribosomal protein L23	4.86071	0.000688251	0.205731	0.826316	20	13	22.65	0.922786	22818
SNF8	8469.XP_007061980.1	Vacuolar-sorting protein SNF8	5.36486	0	0.186398	1	2	12	41	0.912703	0
MRPL28	8469.XP_007066583.1	39S ribosomal protein L28	5.02183	0.000228225	0.199131	0.889706	17	13	22.4118	0.919563	7132
ERLIN1	8469.XP_007057562.1	ER lipid raft associated 1; Erlin-1	5.85655	0.002079	0.170749	0	2	13	6.5	0.902869	12264
EDEM2	8469.XP_007053970.1	alpha-1	1	0	1	1	2	1	2	1	0
EDEM1	8469.XP_007061341.1	ER degradation-enhancing alpha-mannosidase-like 1; Derived by automated computational analysis using gene prediction method: Gnomon. Supporting evidence includes similarity to: 1 EST	0	0	0	0	0	0	0	Infinity	0
LRBA	8469.XP_007055774.1	Lipopolysaccharide-responsive and beige-like anchor protein; The sequence of the model RefSeq protein was modified relative to its source genomic sequence to represent the inferred complete CDS: substituted 1 base at 1 genomic stop codon	0	0	0	0	0	0	0	Infinity	0
CADM2	8469.XP_007060895.1	Cell adhesion molecule 2; Derived by automated computational analysis using gene prediction method: Gnomon. Supporting evidence includes similarity to: 2 mRNAs	0	0	0	0	0	0	0	Infinity	0
COL24A1	8469.XP_007068839.1	Collagen alpha-1(XXIV) chain	0	0	0	0	0	0	0	Infinity	0
UY3_11911	8469.XP_007065051.1	M-phase inducer phosphatase 1-B-like	4.6341	0.00370167	0.215792	0.444444	9	11	21.8889	0.927318	29378
B3GALNT2	8469.XP_007068937.1	Hexosyltransferase; UDP-GalNAc:beta-1	1	0	1	0	1	1	1	1	0
RHBDL2	8469.XP_007069080.1	Rhomboid-related protein 2	0	0	0	0	0	0	0	Infinity	0
CCDC108	8469.XP_007060499.1	Cilia and flagella associated protein 65; Coiled-coil domain-containing protein 108	1	0	1	0	1	1	1	1	0
RSU1	8469.XP_007058516.1	Ras suppressor protein 1; Derived by automated computational analysis using gene prediction method: Gnomon. Supporting evidence includes similarity to: 3 mRNAs	0	0	0	0	0	0	0	Infinity	0
MYO6	8469.XP_007056871.1	Myosin VI; Unconventional myosin-VI	6.05509	0.00351372	0.16515	0	3	13	3.33333	0.898898	26898
C5	8469.XP_007061045.1	Complement C5	0	0	0	0	0	0	0	Infinity	0
UY3_16796	8469.XP_007070076.1	dmX-like protein 1-like	7.38462	0	0.135417	0	1	13	5	0.872308	0
FAM221A	8469.XP_007052753.1	Family with sequence similarity 221 member A; Protein FAM221A	0	0	0	0	0	0	0	Infinity	0
PCNXL4	8469.XP_007065375.1	Pecanex-like protein 4	0	0	0	0	0	0	0	Infinity	0
MRPL20	8469.XP_007070302.1	39S ribosomal protein L20	4.63202	0.00885027	0.215889	0.561254	27	12	21.2963	0.92736	104508
GIGYF2	8469.XP_007052660.1	PERQ amino acid-rich with GYF domain-containing protein 2	5.3763	0.000208653	0.186002	0	2	12	9	0.912474	1378
MRPL13	8469.XP_007063465.1	39S ribosomal protein L13	4.36486	0.0182334	0.229102	0.542529	30	12	23.0333	0.932703	200028
COPS7A	8469.XP_007061464.1	COP9 signalosome complex subunit 7a	0	0	0	0	0	0	0	Infinity	0
MYNN	8469.XP_007055560.1	Myoneurin isoform X1	1.66667	0	0.6	0	1	2	3	0.777778	0
MTMR8	8469.XP_007060242.1	Myotubularin-related protein 8; Belongs to the protein-tyrosine phosphatase family. Non-receptor class myotubularin subfamily.	5.67464	0	0.176223	1	2	13	5	0.906507	0
MRPL16	8469.XP_007070140.1	39S ribosomal protein L16	4.55198	0.00611296	0.219685	0.571429	29	12	23.4138	0.92896	103294
UY3_18789	8469.XP_007072135.1	Calcium/calmodulin-dependent protein kinase type IV-like; Belongs to the complex I 20 kDa subunit family.	1	0	1	0	1	1	1	1	0
TTYH3	8469.XP_007065441.1	Protein tweety homolog; Probable chloride channel.	0	0	0	0	0	0	0	Infinity	0
UY3_10214	8469.XP_007063218.1	The sequence of the model RefSeq protein was modified relative to its source genomic sequence to represent the inferred complete CDS: deleted 2 bases in 1 codon	8.98441	0	0.111304	0	1	15	3	0.840312	0
GRID2IP	8469.XP_007058664.1	Grid2 interacting protein; The sequence of the model RefSeq protein was modified relative to its source genomic sequence to represent the inferred complete CDS: deleted 1 base in 1 codon	1	0	1	0	1	1	1	1	0
PSME2	8469.XP_007065463.1	Proteasome activator complex subunit 2	6.45218	0.00129014	0.154986	0.333333	3	13	4.66667	0.890956	6990
THEGL	8469.XP_007070657.1	Testicular haploid expressed gene protein-like	0	0	0	0	0	0	0	Infinity	0
RBP1	8469.XP_007062534.1	Retinol-binding protein 1; Belongs to the calycin superfamily. Fatty-acid binding protein (FABP) family.	0	0	0	0	0	0	0	Infinity	0
PSME4	8469.XP_007072459.1	Proteasome activator complex subunit 4	6.51663	0	0.153454	1	3	13	5.33333	0.889667	0
RUFY3	8469.XP_007065969.1	Protein RUFY3	0	0	0	0	0	0	0	Infinity	0
RBP3	8469.XP_007069198.1	Retinol-binding protein 3	1	0	1	0	1	1	1	1	0
PRKAR1A	8469.XP_007055140.1	cAMP-dependent protein kinase type I-alpha regulatory subunit	0	0	0	0	0	0	0	Infinity	0
UY3_07707	8469.XP_007060558.1	Claudin; Plays a major role in tight junction-specific obliteration of the intercellular space	0	0	0	0	0	0	0	Infinity	0
EML5	8469.XP_007055991.1	Echinoderm microtubule-associated protein-like 5; Derived by automated computational analysis using gene prediction method: Gnomon. Supporting evidence includes similarity to: 3 mRNAs	0	0	0	0	0	0	0	Infinity	0
EML4	8469.XP_007058095.1	Echinoderm microtubule-associated protein-like 4	0	0	0	0	0	0	0	Infinity	0
EML3	8469.XP_007056935.1	Metastasis-associated protein MTA2; Echinoderm microtubule-associated protein-like 3	0	0	0	0	0	0	0	Infinity	0
UY3_14017	8469.XP_007067193.1	GAS2-like protein 2-like	1.5	0	0.666667	0	1	2	2	0.75	0
HSPG2	8469.XP_007071425.1	Basement membrane-specific heparan sulfate proteoglycan core protein	2.6	0	0.384615	0	1	4	2	0.466667	0
XP_007057640.1	8469.XP_007057640.1	Uncharacterized protein C3orf38 homolog	0	0	0	0	0	0	0	Infinity	0
DNTTIP2	8469.XP_007065240.1	Deoxynucleotidyltransferase terminal-interacting protein 2	4.83472	0.000465609	0.206837	0.842105	20	11	34.55	0.923306	10546
XP_007054409.1	8469.XP_007054409.1	Tissue factor pathway inhibitor 2-like	0	0	0	0	0	0	0	Infinity	0
DNTTIP1	8469.XP_007067831.1	Deoxynucleotidyltransferase terminal-interacting protein 1; Belongs to the ubiquitin-conjugating enzyme family.	0	0	0	0	0	0	0	Infinity	0
CSNK2A2	8469.XP_007063328.1	Casein kinase II subunit alpha; The sequence of the model RefSeq protein was modified relative to its source genomic sequence to represent the inferred complete CDS: deleted 2 bases in 1 codon	6.18607	0	0.161654	1	2	13	3.5	0.896279	0
UY3_02221	8469.XP_007054770.1	Keratin	0	0	0	0	0	0	0	Infinity	0
UY3_17542	8469.XP_007070885.1	Putative ATP-dependent RNA helicase DDX11-like protein 8-like	5.88046	0	0.170055	0	1	13	19	0.902391	0
RBFOX3	8469.XP_007069142.1	RNA binding protein fox-1 homolog; RNA-binding protein that regulates alternative splicing events.	0	0	0	0	0	0	0	Infinity	0
SAMD11	8469.XP_007070315.1	Sterile alpha motif domain-containing protein 11	0	0	0	0	0	0	0	Infinity	0
SAMD13	8469.XP_007068791.1	Sterile alpha motif domain-containing protein 13	0	0	0	0	0	0	0	Infinity	0
PPP4R4	8469.XP_007063506.1	Serine/threonine-protein phosphatase 4 regulatory subunit 4	3.22222	0	0.310345	0	1	5	3	0.259259	0
UY3_04780	8469.XP_007057456.1	Uncharacterized protein C6orf203 homolog	0	0	0	0	0	0	0	Infinity	0
PPP4R1	8469.XP_007072853.1	Serine/threonine-protein phosphatase 4 regulatory subunit 1; The sequence of the model RefSeq protein was modified relative to its source genomic sequence to represent the inferred complete CDS: deleted 1 base in 1 codon	1.88889	0.722222	0.529412	0	3	3	2.33333	0.703704	52
ZFYVE26	8469.XP_007054384.1	Zinc finger FYVE domain-containing protein 26	1	0	1	0	1	1	1	1	0
SAMD14	8469.XP_007062072.1	Sterile alpha motif domain-containing protein 14	0	0	0	0	0	0	0	Infinity	0
LACTB	8469.XP_007068956.1	Serine beta-lactamase-like protein LACTB	0	0	0	0	0	0	0	Infinity	0
LSM10	8469.XP_007060749.1	U7 snRNA-associated Sm-like protein LSm10	4.48337	0.0242962	0.223047	0.480952	21	12	17.8571	0.930333	232646
EHMT1	8469.XP_007067691.1	Histone-lysine N-methyltransferase EHMT1 isoform X1	6.63825	0	0.150642	0	1	13	4	0.887235	0
PGAP3	8469.XP_007062025.1	post-GPI attachment to proteins factor 3	1.33333	0.666667	0.75	0	2	2	1.5	0.833333	4
OSGEPL1	8469.XP_007069955.1	O-sialoglycoprotein endopeptidase like 1; The sequence of the model RefSeq protein was modified relative to its source genomic sequence to represent the inferred complete CDS: inserted 1 base in 1 codon	6.12474	0	0.163272	0	1	12	2	0.897505	0
CKLF	8469.XP_007058726.1	Chemokine-like factor	1.75	0	0.571429	0	1	2	4	0.8125	0
RBMX	8469.XP_007068725.1	Heterogeneous nuclear ribonucleoprotein G-like 1; RNA-binding motif protein	5.88046	0.000586087	0.170055	0.583333	9	14	11.1111	0.902391	2766
LPIN2	8469.XP_007064945.1	Lipin 2; Phosphatidate phosphatase LPIN2 isoform X1	9.30457	0.00415368	0.107474	0.333333	3	17	3	0.833909	27060
KIAA0907	8469.XP_007068152.1	UPF0469 protein KIAA0907 homolog	0	0	0	0	0	0	0	Infinity	0
UY3_14056	8469.XP_007067233.1	Leucine-rich repeat-containing protein 16C-like	0	0	0	0	0	0	0	Infinity	0
CAPN10	8469.XP_007068683.1	Calpain-10; Belongs to the peptidase C2 family.	0	0	0	0	0	0	0	Infinity	0
XP_007071940.1	8469.XP_007071940.1	Derived by automated computational analysis using gene prediction method: Gnomon. Supporting evidence includes similarity to: 1 mRNA	0	0	0	0	0	0	0	Infinity	0
SLC4A7	8469.XP_007068594.1	Solute carrier family 4 member 7; Sodium bicarbonate cotransporter 3	6.58732	0.00615594	0.151807	0	2	13	4.5	0.888254	15986
QPCTL	8469.XP_007070361.1	Glutaminyl-peptide cyclotransferase-like protein	0	0	0	0	0	0	0	Infinity	0
LUM	8469.XP_007059262.1	Lumican; Derived by automated computational analysis using gene prediction method: Gnomon. Supporting evidence includes similarity to: 1 mRNA	7.36486	0.000935106	0.13578	0.333333	4	14	5.25	0.872703	5628
ATP13A1	8469.XP_007065124.1	Probable cation-transporting ATPase 13A1-like	1	0	1	0	1	1	1	1	0
CRYGS	8469.XP_007052683.1	Beta-crystallin S	0	0	0	0	0	0	0	Infinity	0
XP_007066463.1	8469.XP_007066463.1	E3 ubiquitin-protein ligase TRIM39-like	0	0	0	0	0	0	0	Infinity	0
PDSS2	8469.XP_007057459.1	Decaprenyl-diphosphate synthase subunit 2; Derived by automated computational analysis using gene prediction method: Gnomon. Supporting evidence includes similarity to: 12 Proteins	7.17048	0.00395194	0.139461	0	2	15	4	0.87659	35064
XP_007062068.1	8469.XP_007062068.1	Putative all-trans-retinol 13	8.31497	0	0.120265	1	3	16	5.66667	0.853701	0
XP_007066104.1	8469.XP_007066104.1	Junctional adhesion molecule A-like	6.86798	0	0.145603	1	3	13	7	0.88264	0
ERICH3	8469.XP_007062650.1	The sequence of the model RefSeq protein was modified relative to its source genomic sequence to represent the inferred complete CDS: inserted 4 bases in 2 codons	0	0	0	0	0	0	0	Infinity	0
LEPROTL1	8469.XP_007070653.1	Leptin receptor overlapping transcript-like 1	1	0	1	0	1	1	1	1	0
FAM120C	8469.XP_007069856.1	Family with sequence similarity 120C; Constitutive coactivator of PPAR-gamma-like protein 2	0	0	0	0	0	0	0	Infinity	0
ERICH2	8469.XP_007056769.1	Glutamate-rich protein 2	0	0	0	0	0	0	0	Infinity	0
XP_007059446.1	8469.XP_007059446.1	Zinc finger RNA-binding protein-like	6.64033	0.00101746	0.150595	0	2	15	5	0.887193	4514
FAM194A	8469.XP_007057438.1	Protein FAM194A	0	0	0	0	0	0	0	Infinity	0
GNA13	8469.XP_007055144.1	Guanine nucleotide-binding protein subunit alpha-13	7.69647	0	0.12993	0	1	14	2	0.866071	0
ETFDH	8469.XP_007071342.1	Electron transfer flavoprotein-ubiquinone oxidoreductase	7.28898	0.00294626	0.137193	0.166667	4	15	3.5	0.87422	13042
KDM3A	8469.XP_007063772.1	Lysine-specific demethylase 3A	0	0	0	0	0	0	0	Infinity	0
COLEC12	8469.XP_007064852.1	Collectin-12	3.57143	0	0.28	0	1	6	2	0.142857	0
MYH7	8469.XP_007072733.1	Myosin heavy chain 7; The sequence of the model RefSeq protein was modified relative to its source genomic sequence to represent the inferred complete CDS: inserted 2 bases in 1 codon; deleted 2 bases in 1 codon	0	0	0	0	0	0	0	Infinity	0
HAGH	8469.XP_007058627.1	Hydroxyacylglutathione hydrolase	9.31705	0	0.10733	0	1	17	3	0.833659	0
DNASE2	8469.XP_007058287.1	Deoxyribonuclease-2-alpha	0	0	0	0	0	0	0	Infinity	0
COL6A3	8469.XP_007069209.1	Collagen alpha-3(VI) chain	7.3264	0	0.136493	1	4	14	5.75	0.873472	0
MYH9	8469.XP_007062710.1	Myosin-9 isoform X1; Belongs to the TRAFAC class myosin-kinesin ATPase superfamily. Myosin family.	0	0	0	0	0	0	0	Infinity	0
CDH12	8469.XP_007059982.1	Cadherin-12	0	0	0	0	0	0	0	Infinity	0
COL6A1	8469.XP_007066746.1	Collagen alpha-1(VI) chain	6.88981	0.00245935	0.145142	0.6	5	14	4.8	0.882204	23256
RFT1	8469.XP_007055656.1	Protein RFT1 homolog	7.82744	0.00100344	0.127756	0	2	16	2.5	0.863451	5070
ALDH1A2	8469.XP_007056443.1	Retinal dehydrogenase 2 isoform X1; Belongs to the aldehyde dehydrogenase family.	7.32952	0.002079	0.136435	0.5	4	15	5.25	0.87341	6788
COL6A2	8469.XP_007066747.1	Collagen alpha-2(VI) chain; The sequence of the model RefSeq protein was modified relative to its source genomic sequence to represent the inferred complete CDS: inserted 1 base in 1 codon	7.3264	0	0.136493	1	4	14	5.75	0.873472	0
RASA1	8469.XP_007054121.1	Ras GTPase-activating protein 1	5.94491	0	0.168211	0	1	12	11	0.901102	0
IGDCC4	8469.XP_007053589.1	Immunoglobulin superfamily DCC subclass member 4; The sequence of the model RefSeq protein was modified relative to its source genomic sequence to represent the inferred complete CDS: inserted 2 bases in 1 codon	0	0	0	0	0	0	0	Infinity	0
DDAH1	8469.XP_007068801.1	N(G)	4.15789	0	0.240506	0	1	6	3	0.210526	0
RBL1	8469.XP_007053975.1	RB transcriptional corepressor like 1; The sequence of the model RefSeq protein was modified relative to its source genomic sequence to represent the inferred complete CDS: deleted 3 bases in 2 codons; substituted 1 base at 1 genomic stop codon	5.32328	8.5811e-05	0.187854	0.333333	4	12	12.25	0.913534	726
CFAP221	8469.XP_007057111.1	Cilia and flagella associated protein 221; Primary ciliary dyskinesia protein 1-like	6.70374	0.00191269	0.14917	0	3	12	4	0.885925	13706
XP_007068871.1	8469.XP_007068871.1	Derived by automated computational analysis using gene prediction method: Gnomon. Supporting evidence includes similarity to: 7 Proteins	0	0	0	0	0	0	0	Infinity	0
2020-09-03	8469.XP_007053389.1	Neuronal-specific septin-3 isoform X1; Belongs to the TRAFAC class TrmE-Era-EngA-EngB-Septin- like GTPase superfamily. Septin GTPase family.	1.33333	0.666667	0.75	0	2	2	1.5	0.833333	4
IQCG	8469.XP_007057873.1	IQ domain-containing protein G	1	0	1	0	1	1	1	1	0
POMGNT2	8469.XP_007072872.1	Putative glycosyltransferase AGO61; The sequence of the model RefSeq protein was modified relative to its source genomic sequence to represent the inferred complete CDS: inserted 1 base in 1 codon	1	0	1	0	1	1	1	1	0
MYRIP	8469.XP_007067398.1	Rab effector MyRIP; Derived by automated computational analysis using gene prediction method: Gnomon. Supporting evidence includes similarity to: 1 mRNA	0	0	0	0	0	0	0	Infinity	0
IQCC	8469.XP_007067671.1	IQ domain-containing protein C	0	0	0	0	0	0	0	Infinity	0
2020-09-01	8469.XP_007072694.1	Septin 1; The sequence of the model RefSeq protein was modified relative to its source genomic sequence to represent the inferred complete CDS: deleted 2 bases in 1 codon	1.5	0	0.666667	0	1	2	2	0.75	0
IQCE	8469.XP_007065439.1	IQ domain-containing protein E	1	0	1	0	1	1	1	1	0
PROSER1	8469.XP_007070970.1	Proline and serine-rich protein 1	0	0	0	0	0	0	0	Infinity	0
XP_007068245.1	8469.XP_007068245.1	UPF0668 protein C10orf76 homolog	1.33333	0.666667	0.75	0	2	2	1.5	0.833333	4
SRGN	8469.XP_007054714.1	Serglycin	0	0	0	0	0	0	0	Infinity	0
RHBDF1	8469.XP_007055882.1	Rhomboid 5 homolog 1; The sequence of the model RefSeq protein was modified relative to its source genomic sequence to represent the inferred complete CDS: substituted 1 base at 1 genomic stop codon	6.06965	0	0.164754	0	1	13	8	0.898607	0
MAPK1IP1L	8469.XP_007062772.1	MAPK-interacting and spindle-stabilizing protein-like	0	0	0	0	0	0	0	Infinity	0
KDM6B	8469.XP_007066355.1	Lysine-specific demethylase 6B-like	0	0	0	0	0	0	0	Infinity	0
KDM6A	8469.XP_007064502.1	Lysine-specific demethylase 6A	5.39501	0.00303116	0.185356	0.285714	7	11	6.85714	0.9121	17524
RBM5	8469.XP_007052738.1	RNA-binding protein 5	0	0	0	0	0	0	0	Infinity	0
COLGALT1	8469.XP_007065120.1	Procollagen galactosyltransferase 1	1	0	1	0	1	1	1	1	0
TOPBP1	8469.XP_007064373.1	DNA topoisomerase 2-binding protein 1 isoform X1	4.85967	0.000538515	0.205775	0.5	12	12	21.75	0.922807	6570
CASP2	8469.XP_007066518.1	Caspase-2; Belongs to the peptidase C14A family.	5.71414	0.00748657	0.175005	0.333333	3	12	4.33333	0.905717	49058
XP_007070626.1	8469.XP_007070626.1	E3 ubiquitin-protein ligase TRIM39-like	0	0	0	0	0	0	0	Infinity	0
SNAPC4	8469.XP_007061057.1	snRNA-activating protein complex subunit 4	1.66667	0	0.6	0	1	2	3	0.777778	0
NTMT1	8469.XP_007061129.1	Alpha N-terminal protein methyltransferase 1A; Derived by automated computational analysis using gene prediction method: Gnomon. Supporting evidence includes similarity to: 1 mRNA	0	0	0	0	0	0	0	Infinity	0
SIX5	8469.XP_007071037.1	Homeobox protein SIX5	0	0	0	0	0	0	0	Infinity	0
MFSD5	8469.XP_007058581.1	Major facilitator superfamily domain-containing protein 5; Molybdate-anion transporter	6.54158	0	0.152868	0	1	13	2	0.889168	0
FAM166A	8469.XP_007066128.1	Family with sequence similarity 166 member A; Protein FAM166A	0	0	0	0	0	0	0	Infinity	0
CASP9	8469.XP_007067800.1	Caspase-9	5	0.00588481	0.2	0.333333	6	11	9.33333	0.92	36556
YBX3	8469.XP_007069392.1	DNA-binding protein A; Y-box-binding protein 3	7.86071	0	0.127215	1	2	14	7	0.862786	0
RABEPK	8469.XP_007061008.1	Rab9 effector protein with kelch motifs	8.39813	0	0.119074	0	1	16	4	0.852037	0
HAPLN3	8469.XP_007060415.1	Hyaluronan and proteoglycan link protein 3	0	0	0	0	0	0	0	Infinity	0
DBH	8469.XP_007061076.1	Dopamine beta-hydroxylase; Derived by automated computational analysis using gene prediction method: Gnomon. Supporting evidence includes similarity to: 2 mRNAs	0	0	0	0	0	0	0	Infinity	0
CBY1	8469.XP_007069153.1	Protein chibby homolog 1	0	0	0	0	0	0	0	Infinity	0
KDM5B	8469.XP_007057962.1	Lysine-specific demethylase 5B	6.20998	0	0.161031	0	1	14	6	0.8958	0
MUS81	8469.XP_007056228.1	Crossover junction endonuclease MUS81	4.71622	0.0054381	0.212034	0.437908	18	11	16.4444	0.925676	54534
KLHDC9	8469.XP_007068192.1	Kelch domain-containing protein 9	0	0	0	0	0	0	0	Infinity	0
FGFR4	8469.XP_007065067.1	Fibroblast growth factor receptor 4	8.10603	1.44225e-06	0.123365	0	2	15	3.5	0.857879	4
BRWD1	8469.XP_007064525.1	Bromodomain and WD repeat-containing protein 1	0	0	0	0	0	0	0	Infinity	0
LRP10	8469.XP_007065486.1	Low-density lipoprotein receptor-related protein 10	0	0	0	0	0	0	0	Infinity	0
CAPRIN1	8469.XP_007068024.1	Caprin-1	6.08316	0	0.164388	0	1	13	6	0.898337	0
EIF2S3	8469.XP_007070530.1	Eukaryotic translation initiation factor 2 subunit 3; The sequence of the model RefSeq protein was modified relative to its source genomic sequence to represent the inferred complete CDS: substituted 1 base at 1 genomic stop codon	4.59563	0.0110587	0.217598	0.272727	11	12	18.5455	0.928087	77416
COQ4	8469.XP_007057352.1	Ubiquinone biosynthesis protein COQ4 homolog	7.59148	0.00648732	0.131727	0	5	14	1.4	0.86817	45576
UY3_00556	8469.XP_007053093.1	BCL2/adenovirus E1B 19 kDa protein-interacting protein 3; Derived by automated computational analysis using gene prediction method: Gnomon. Supporting evidence includes similarity to: 1 EST	5.85343	0	0.17084	0	1	12	9	0.902931	0
CPSF3	8469.XP_007053254.1	Cleavage and polyadenylation specificity factor subunit 3	6.53015	0.00415584	0.153136	0	3	14	1.33333	0.889397	21226
MLKL	8469.XP_007071298.1	Mixed lineage kinase domain-like protein; The sequence of the model RefSeq protein was modified relative to its source genomic sequence to represent the inferred complete CDS: inserted 1 base in 1 codon; deleted 1 base in 1 codon; substituted 2 bases at 2 genomic stop codons	8.42723	0.002079	0.118663	0	2	16	2	0.851455	9080
CPSF6	8469.XP_007065902.1	Cleavage and polyadenylation specificity factor subunit 6	5.78274	0.00496256	0.172928	0.2	6	13	9.16667	0.904345	39074
CBX5	8469.XP_007065867.1	Chromobox protein homolog 5	0	0	0	0	0	0	0	Infinity	0
CLSPN	8469.XP_007060809.1	Claspin; The sequence of the model RefSeq protein was modified relative to its source genomic sequence to represent the inferred complete CDS: substituted 1 base at 1 genomic stop codon	4.75676	0.00410435	0.210227	0.397436	13	12	23.3077	0.924865	36126
RPRD1B	8469.XP_007071067.1	Regulation of nuclear pre-mRNA domain-containing protein 1B	5.96674	0	0.167596	0	1	12	13	0.900665	0
CDH24	8469.XP_007065481.1	Cadherin-24	0	0	0	0	0	0	0	Infinity	0
TCTEX1D4	8469.XP_007061712.1	Tctex1 domain-containing protein 4	0	0	0	0	0	0	0	Infinity	0
UY3_01621	8469.XP_007054174.1	dnaJ homolog subfamily B member 6-like isoform X1	0	0	0	0	0	0	0	Infinity	0
UY3_02419	8469.XP_007055076.1	Thyroid adenoma-associated protein homolog	0	0	0	0	0	0	0	Infinity	0
SCUBE3	8469.XP_007063559.1	Signal peptide	0	0	0	0	0	0	0	Infinity	0
XP_007054663.1	8469.XP_007054663.1	Zinc finger protein 850-like	0	0	0	0	0	0	0	Infinity	0
FBLN5	8469.XP_007055505.1	Fibulin-5	7.69854	0	0.129895	0	1	14	2	0.866029	0
PMF1	8469.XP_007064643.1	Polyamine-modulated factor 1	5.9501	0	0.168064	0	1	12	3	0.900998	0
XP_007053008.1	8469.XP_007053008.1	Helicase SRCAP-like	0	0	0	0	0	0	0	Infinity	0
XP_007063757.1	8469.XP_007063757.1	Opsin-5-like	0	0	0	0	0	0	0	Infinity	0
ZCCHC8	8469.XP_007058366.1	Zinc finger CCHC domain-containing protein 8	6.58004	0	0.151975	0	1	14	6	0.888399	0
DAP3	8469.XP_007068148.1	Death associated protein 3; 28S ribosomal protein S29	4.86175	0.000673585	0.205687	0.847953	19	13	23.2105	0.922765	22588
MATR3	8469.XP_007059235.1	Matrin-3-like	5.35759	0.00634492	0.186651	0.47619	15	13	10.2	0.912848	42780
CERCAM	8469.XP_007057395.1	Glycosyltransferase 25 family member 3; The sequence of the model RefSeq protein was modified relative to its source genomic sequence to represent the inferred complete CDS: substituted 3 bases at 3 genomic stop codons	4.15789	0	0.240506	0	1	6	3	0.210526	0
FAM161A	8469.XP_007064192.1	T-complex protein 1 subunit delta; Molecular chaperone; assists the folding of proteins upon ATP hydrolysis.	0	0	0	0	0	0	0	Infinity	0
EMCN	8469.XP_007063100.1	Endomucin	0	0	0	0	0	0	0	Infinity	0
PRPF6	8469.XP_007062619.1	pre-mRNA-processing factor 6	4.87838	0.00273333	0.204986	0.614035	19	12	17.8947	0.922432	26552
PACRGL	8469.XP_007069820.1	PARK2 coregulated like; Derived by automated computational analysis using gene prediction method: Gnomon. Supporting evidence includes similarity to: 7 Proteins	0	0	0	0	0	0	0	Infinity	0
SHISA6	8469.XP_007072635.1	Protein shisa-6 homolog	0	0	0	0	0	0	0	Infinity	0
LZTFL1	8469.XP_007064378.1	Leucine zipper transcription factor-like protein 1	6.33368	0	0.157886	1	2	14	3	0.893326	0
TRPC4AP	8469.XP_007053989.1	Short transient receptor potential channel 4-associated protein	1	0	1	1	2	1	2	1	0
SHISA9	8469.XP_007058216.1	Protein shisa-9	0	0	0	0	0	0	0	Infinity	0
ALG13	8469.XP_007060298.1	Putative bifunctional UDP-N-acetylglucosamine transferase and deubiquitinase ALG13	7.73597	0	0.129266	0	1	15	3	0.865281	0
IL11RA	8469.XP_007055975.1	Interleukin-11 receptor subunit alpha	0	0	0	0	0	0	0	Infinity	0
UY3_05845	8469.XP_007058603.1	Zinc finger protein 850-like	0	0	0	0	0	0	0	Infinity	0
CHRNB3	8469.XP_007063133.1	Neuronal acetylcholine receptor subunit beta-3; Derived by automated computational analysis using gene prediction method: Gnomon. Supporting evidence includes similarity to: 1 mRNA	0	0	0	0	0	0	0	Infinity	0
TRAPPC2L	8469.XP_007059363.1	Trafficking protein particle complex subunit 2-like protein	1.5	0	0.666667	0	1	2	2	0.75	0
GAS2L3	8469.XP_007067756.1	Growth arrest specific 2 like 3; Derived by automated computational analysis using gene prediction method: Gnomon. Supporting evidence includes similarity to: 9 Proteins	0	0	0	0	0	0	0	Infinity	0
POSTN	8469.XP_007070961.1	Periostin isoform X1	7.56965	0	0.132107	1	2	14	7	0.868607	0
NOM1	8469.XP_007061551.1	Nucleolar MIF4G domain-containing protein 1	4.88565	0.003618	0.204681	0.626374	14	12	29.9286	0.922287	33760
NANOS2	8469.XP_007071042.1	Nanos homolog 2; Belongs to the nanos family.	6.22453	0	0.160655	1	2	14	6	0.895509	0
GUCY1A3	8469.XP_007071330.1	Guanylate cyclase soluble subunit alpha-3; Belongs to the adenylyl cyclase class-4/guanylyl cyclase family.	7.22869	0.000126916	0.138338	0	2	15	7	0.875426	17640
HADH	8469.XP_007054466.1	Hydroxyacyl-coenzyme A dehydrogenase	5.82536	0.0471638	0.171663	0.138889	9	14	4.22222	0.903493	224210
FAM81B	8469.XP_007054160.1	Protein FAM81B	0	0	0	0	0	0	0	Infinity	0
EME1	8469.XP_007052818.1	Crossover junction endonuclease EME1	5.07692	0.000822715	0.19697	0.666667	7	11	18.1429	0.918462	8726
COL4A3BP	8469.XP_007064563.1	Collagen type IV alpha-3-binding protein	0	0	0	0	0	0	0	Infinity	0
TATDN1	8469.XP_007065815.1	TatD DNase domain containing 1; Derived by automated computational analysis using gene prediction method: Gnomon. Supporting evidence includes similarity to: 10 Proteins	1	0	1	0	1	1	1	1	0
DOCK11	8469.XP_007056256.1	Dedicator of cytokinesis protein 11; Belongs to the DOCK family.	0	0	0	0	0	0	0	Infinity	0
DOCK10	8469.XP_007058254.1	Dedicator of cytokinesis protein 10; Belongs to the DOCK family.	0	0	0	0	0	0	0	Infinity	0
XP_007066366.1	8469.XP_007066366.1	Derived by automated computational analysis using gene prediction method: Gnomon. Supporting evidence includes similarity to: 13 Proteins	1	0	1	0	1	1	1	1	0
LZIC	8469.XP_007053779.1	Protein LZIC	0	0	0	0	0	0	0	Infinity	0
CWC25	8469.XP_007062011.1	CWC25 spliceosome associated protein homolog; The sequence of the model RefSeq protein was modified relative to its source genomic sequence to represent the inferred complete CDS: inserted 2 bases in 1 codon	4.85967	0.00801568	0.205775	0.363636	12	12	14.6667	0.922807	50530
SPPL2A	8469.XP_007066928.1	Signal peptide peptidase-like 2A	0	0	0	0	0	0	0	Infinity	0
NUPL2	8469.XP_007066236.1	Nucleoporin-like protein 2	6.99064	0	0.143048	0	1	13	9	0.880187	0
COPG1	8469.XP_007060051.1	Coatomer subunit gamma-1 isoform X1	5.49168	0.0120362	0.182094	0.333333	4	13	12.75	0.910166	89476
F2RL1	8469.XP_007064580.1	F2R like trypsin receptor 1; Proteinase-activated receptor 2	0	0	0	0	0	0	0	Infinity	0
KBTBD2	8469.XP_007064411.1	Kelch repeat and BTB domain-containing protein 2	0	0	0	0	0	0	0	Infinity	0
CAPZA1	8469.XP_007059652.1	F-actin-capping protein subunit alpha-1	0	0	0	0	0	0	0	Infinity	0
XP_007052886.1	8469.XP_007052886.1	Uncharacterized protein C5orf34 homolog	0	0	0	0	0	0	0	Infinity	0
XP_007058599.1	8469.XP_007058599.1	Zinc finger protein 135-like	0	0	0	0	0	0	0	Infinity	0
PDP1	8469.XP_007052963.1	[Pyruvate dehydrogenase [acetyl-transferring]]-phosphatase 1	7.73805	0	0.129232	0	1	15	4	0.865239	0
UY3_03147	8469.XP_007055790.1	Cytochrome c oxidase assembly protein COX16 homolog	0	0	0	0	0	0	0	Infinity	0
SORBS3	8469.XP_007068396.1	Sorbin and SH3 domain containing 3; Vinexin	0	0	0	0	0	0	0	Infinity	0
MPP6	8469.XP_007071624.1	MAGUK p55 subfamily member 6; Belongs to the MAGUK family.	5.80769	0	0.172185	1	2	12	9.5	0.903846	0
GRHL1	8469.XP_007053238.1	Grainyhead-like protein 1 homolog	0	0	0	0	0	0	0	Infinity	0
VAX1	8469.XP_007056405.1	Ventral anterior homeobox 1	0	0	0	0	0	0	0	Infinity	0
MLH1	8469.XP_007057300.1	DNA mismatch repair protein Mlh1	4.31705	0.0403183	0.23164	0.373626	14	11	21.8571	0.933659	496068
SORBS2	8469.XP_007063703.1	Sorbin and SH3 domain-containing protein 2; Derived by automated computational analysis using gene prediction method: Gnomon. Supporting evidence includes similarity to: 1 mRNA	1	0	1	0	1	1	1	1	0
LSAMP	8469.XP_007062140.1	Limbic system-associated membrane protein isoform X1	0	0	0	0	0	0	0	Infinity	0
LHFPL5	8469.XP_007063549.1	Tetraspan membrane protein of hair cell stereocilia homolog	6.65385	0.00701855	0.150289	0	2	14	3	0.886923	53590
FAM46C	8469.XP_007067936.1	Protein FAM46C	0	0	0	0	0	0	0	Infinity	0
SLC31A1	8469.XP_007067731.1	High affinity copper uptake protein 1; Derived by automated computational analysis using gene prediction method: Gnomon. Supporting evidence includes similarity to: 19 Proteins	0	0	0	0	0	0	0	Infinity	0
SVIL	8469.XP_007064348.1	Supervillin; The sequence of the model RefSeq protein was modified relative to its source genomic sequence to represent the inferred complete CDS: inserted 2 bases in 1 codon	0	0	0	0	0	0	0	Infinity	0
MPP2	8469.XP_007062067.1	MAGUK p55 subfamily member 2; Belongs to the MAGUK family.	5.80769	0	0.172185	1	2	12	9.5	0.903846	0
GINS1	8469.XP_007059041.1	DNA replication complex GINS protein PSF1	4.86071	6.40905e-05	0.205731	0.694444	9	12	25	0.922786	782
EMC9	8469.XP_007065464.1	ER membrane protein complex subunit 9	0	0	0	0	0	0	0	Infinity	0
SLC22A31	8469.XP_007059413.1	Uncharacterized protein; Putative solute carrier family 22 member 31	0	0	0	0	0	0	0	Infinity	0
XP_007053283.1	8469.XP_007053283.1	The sequence of the model RefSeq protein was modified relative to its source genomic sequence to represent the inferred complete CDS: deleted 2 bases in 1 codon	0	0	0	0	0	0	0	Infinity	0
SUSD5	8469.XP_007057298.1	Sushi domain containing 5; Derived by automated computational analysis using gene prediction method: Gnomon. Supporting evidence includes similarity to: 5 Proteins	0	0	0	0	0	0	0	Infinity	0
GPBP1L1	8469.XP_007061725.1	Vasculin-like protein 1; Derived by automated computational analysis using gene prediction method: Gnomon. Supporting evidence includes similarity to: 1 mRNA	7.15281	0	0.139805	0	1	13	2	0.876944	0
KIAA0247	8469.XP_007054300.1	Uncharacterized protein; Derived by automated computational analysis using gene prediction method: Gnomon. Supporting evidence includes similarity to: 7 Proteins	0	0	0	0	0	0	0	Infinity	0
WIF1	8469.XP_007065769.1	Wnt inhibitory factor 1	1.33333	0.166667	0.75	0	2	2	2	0.833333	2
EGFLAM	8469.XP_007065794.1	Pikachurin isoform X1	0	0	0	0	0	0	0	Infinity	0
ZDHHC18	8469.XP_007064915.1	Zinc finger DHHC-type containing 18; Palmitoyltransferase ZDHHC18	0	0	0	0	0	0	0	Infinity	0
UY3_15403	8469.XP_007068692.1	PHD finger protein 23B-like	0	0	0	0	0	0	0	Infinity	0
AMN1	8469.XP_007067534.1	Protein AMN1 homolog	0	0	0	0	0	0	0	Infinity	0
BEGAIN	8469.XP_007065025.1	Brain-enriched guanylate kinase-associated protein; The sequence of the model RefSeq protein was modified relative to its source genomic sequence to represent the inferred complete CDS: inserted 1 base in 1 codon	0	0	0	0	0	0	0	Infinity	0
NOL4	8469.XP_007058846.1	Nucleolar protein 4 isoform X1	0	0	0	0	0	0	0	Infinity	0
UY3_07051	8469.XP_007059846.1	Tubulin beta chain; Tubulin is the major constituent of microtubules. It binds two moles of GTP	0	0	0	0	0	0	0	Infinity	0
VWCE	8469.XP_007065834.1	Von Willebrand factor C and EGF domain-containing protein	0	0	0	0	0	0	0	Infinity	0
NOL8	8469.XP_007055643.1	Nucleolar protein 8	0	0	0	0	0	0	0	Infinity	0
AMER3	8469.XP_007064617.1	APC membrane recruitment protein 3	0	0	0	0	0	0	0	Infinity	0
SDCCAG3	8469.XP_007061163.1	Serologically defined colon cancer antigen 3 homolog	0	0	0	0	0	0	0	Infinity	0
AMER2	8469.XP_007059167.1	APC membrane recruitment protein 2 isoform X1	0	0	0	0	0	0	0	Infinity	0
VGLL4	8469.XP_007056542.1	Transcription cofactor vestigial-like protein 4 isoform X1	1	1	1	0	2	1	1	1	2
TLR3	8469.XP_007063701.1	Toll-like receptor 3	5.9948	0.00993219	0.166811	0.166667	4	12	3.5	0.900104	58862
VWA2	8469.XP_007056409.1	Von Willebrand factor A domain-containing protein 2	1	0	1	0	1	1	1	1	0
UY3_11072	8469.XP_007064164.1	Sperm flagellar protein 2-like	0	0	0	0	0	0	0	Infinity	0
CLDN19	8469.XP_007065987.1	Claudin-19	0	0	0	0	0	0	0	Infinity	0
SCNM1	8469.XP_007068220.1	Sodium channel modifier 1	0	0	0	0	0	0	0	Infinity	0
UY3_07919	8469.XP_007060753.1	Angiopoietin-2-like	7.12162	0	0.140417	0	1	14	5	0.877568	0
VWA9	8469.XP_007059544.1	Integrator complex subunit 14; Von Willebrand factor A domain-containing protein 9 isoform X1	1.66667	0	0.6	0	1	2	3	0.777778	0
VWA8	8469.XP_007061375.1	Uncharacterized protein; Von Willebrand factor A domain-containing protein 8 isoform X1	5.10291	0	0.195967	1	4	12	40.75	0.917942	0
TLR1	8469.XP_007059775.1	Toll-like receptor 1	0	0	0	0	0	0	0	Infinity	0
SLC22A23	8469.XP_007058894.1	Solute carrier family 22 member 23; Derived by automated computational analysis using gene prediction method: Gnomon. Supporting evidence includes similarity to: 1 mRNA	0	0	0	0	0	0	0	Infinity	0
GFRA4	8469.XP_007054966.1	GDNF family receptor alpha-4	0	0	0	0	0	0	0	Infinity	0
MLF2	8469.XP_007069689.1	Myeloid leukemia factor 2	0	0	0	0	0	0	0	Infinity	0
MTSS1	8469.XP_007065812.1	Metastasis suppressor protein 1; Derived by automated computational analysis using gene prediction method: Gnomon. Supporting evidence includes similarity to: 1 EST	1	0	1	0	1	1	1	1	0
PROX1	8469.XP_007064813.1	Prospero homeobox protein 1 isoform X1	0	0	0	0	0	0	0	Infinity	0
TOP3A	8469.XP_007060121.1	DNA topoisomerase; Introduces a single-strand break via transesterification at a target site in duplex DNA. Releases the supercoiling and torsional tension of DNA introduced during the DNA replication and transcription by transiently cleaving and rejoining one strand of the DNA duplex. The scissile phosphodiester is attacked by the catalytic tyrosine of the enzyme	5.02287	0.000409791	0.199089	0.5	12	11	17.3333	0.919543	7006
PARP2	8469.XP_007072052.1	Poly [ADP-ribose] polymerase; The sequence of the model RefSeq protein was modified relative to its source genomic sequence to represent the inferred complete CDS: substituted 1 base at 1 genomic stop codon	5.99896	0	0.166696	0	1	12	6	0.900021	0
TMED9	8469.XP_007065056.1	Transmembrane emp24 domain-containing protein 9	0	0	0	0	0	0	0	Infinity	0
TOP3B	8469.XP_007054991.1	DNA topoisomerase; Introduces a single-strand break via transesterification at a target site in duplex DNA. Releases the supercoiling and torsional tension of DNA introduced during the DNA replication and transcription by transiently cleaving and rejoining one strand of the DNA duplex. The scissile phosphodiester is attacked by the catalytic tyrosine of the enzyme	5.31289	0	0.188221	1	4	12	20.25	0.913742	0
LRRCC1	8469.XP_007053020.1	Leucine-rich repeat and coiled-coil domain-containing protein 1	8.14553	0	0.122767	0	1	15	6	0.857089	0
UBXN6	8469.XP_007072163.1	UBX domain-containing protein 6	9.98129	0	0.100187	0	1	17	2	0.820374	0
UY3_17160	8469.XP_007070483.1	Serine/threonine-protein kinase D3-like	0	0	0	0	0	0	0	Infinity	0
HRAS	8469.XP_007056802.1	GTPase HRas	4.94595	0.0654849	0.202186	0.0545455	11	11	6.54545	0.921081	380438
FEZF1	8469.XP_007068737.1	Fez family zinc finger protein 1 isoform X1	0	0	0	0	0	0	0	Infinity	0
TMED7	8469.XP_007055470.1	Transmembrane emp24 domain-containing protein 7	0	0	0	0	0	0	0	Infinity	0
ZNF800	8469.XP_007056917.1	Zinc finger protein 800 isoform X1	0	0	0	0	0	0	0	Infinity	0
TMED3	8469.XP_007059611.1	Transmembrane emp24 domain-containing protein 3	0	0	0	0	0	0	0	Infinity	0
XP_007061965.1	8469.XP_007061965.1	Collagen alpha-1(I) chain-like	6.57173	0.004006	0.152167	0.428571	7	13	4.42857	0.888565	41156
XPO5	8469.XP_007071714.1	Exportin-5	6.46258	0	0.154737	0	1	13	15	0.890748	0
NCS1	8469.XP_007061120.1	Neuronal calcium sensor 1	0	0	0	0	0	0	0	Infinity	0
SIPA1L1	8469.XP_007055796.1	Signal-induced proliferation-associated 1-like protein 1; Derived by automated computational analysis using gene prediction method: Gnomon. Supporting evidence includes similarity to: 3 mRNAs	0	0	0	0	0	0	0	Infinity	0
SPPL3	8469.XP_007061617.1	Signal peptide peptidase-like 3	1	0	1	0	1	1	1	1	0
SRA1	8469.XP_007059246.1	Steroid receptor RNA activator 1	0	0	0	0	0	0	0	Infinity	0
SLC35F5	8469.XP_007060936.1	Solute carrier family 35 member F5; Derived by automated computational analysis using gene prediction method: Gnomon. Supporting evidence includes similarity to: 11 Proteins	0	0	0	0	0	0	0	Infinity	0
TENM4	8469.XP_007060649.1	Teneurin-4	0	0	0	0	0	0	0	Infinity	0
C2CD3	8469.XP_007062370.1	C2 domain-containing protein 3-like	9.38462	0	0.106557	0	1	17	3	0.832308	0
HIP1	8469.XP_007069096.1	Huntingtin-interacting protein 1-like	7.38565	0.00415368	0.135398	0	2	15	2.5	0.872287	23792
ZCCHC10	8469.XP_007063677.1	Zinc finger CCHC domain-containing protein 10	0	0	0	0	0	0	0	Infinity	0
AHCTF1	8469.XP_007058047.1	Protein ELYS; The sequence of the model RefSeq protein was modified relative to its source genomic sequence to represent the inferred complete CDS: substituted 4 bases at 4 genomic stop codons; Belongs to the TRAFAC class myosin-kinesin ATPase superfamily. Kinesin family.	5.97401	0.000171695	0.167392	0.8	5	12	10	0.90052	2066
KIAA0947	8469.XP_007053326.1	Uncharacterized protein KIAA0947 homolog	6.84511	0	0.14609	0	1	14	2	0.883098	0
RPS20	8469.XP_007054565.1	40S ribosomal protein S20; Derived by automated computational analysis using gene prediction method: Gnomon. Supporting evidence includes similarity to: 2 mRNAs	4.35759	0.0369361	0.229485	0.33871	32	12	22.6875	0.932848	347348
XP_007055402.1	8469.XP_007055402.1	Protein INCA1-like	0	0	0	0	0	0	0	Infinity	0
SMTN	8469.XP_007061441.1	Smoothelin; The sequence of the model RefSeq protein was modified relative to its source genomic sequence to represent the inferred complete CDS: deleted 2 bases in 1 codon	1	0	1	0	1	1	1	1	0
XP_007057899.1	8469.XP_007057899.1	Deoxyribodipyrimidine photo-lyase-like	7.342	0	0.136203	0	1	14	4	0.87316	0
UY3_14118	8469.XP_007067289.1	Chymotrypsin-like elastase family member 2A-like isoform X1; Belongs to the peptidase S1 family.	0	0	0	0	0	0	0	Infinity	0
SMU1	8469.XP_007057983.1	WD40 repeat-containing protein SMU1	4.88773	9.28335e-05	0.204594	0.923077	14	12	21.2143	0.922245	3474
KIAA0020	8469.XP_007065652.1	Uncharacterized protein; Derived by automated computational analysis using gene prediction method: Gnomon. Supporting evidence includes similarity to: 1 mRNA	4.4106	0.0339825	0.226726	0.586585	41	10	28.6829	0.931788	338714
KLHDC8B	8469.XP_007065996.1	Kelch domain-containing protein 8B	1	0	1	0	1	1	1	1	0
SYNRG	8469.XP_007057782.1	Synergin gamma	0	0	0	0	0	0	0	Infinity	0
STX1B	8469.XP_007071012.1	syntaxin-1B	7.24532	0	0.13802	1	2	13	6.5	0.875094	0
ATP6V0A2	8469.XP_007058326.1	ATPase H+ transporting V0 subunit a2; V-type proton ATPase 116 kDa subunit a isoform 2	7.3763	0.0082987	0.135569	0	3	13	3	0.872474	42176
ZNHIT6	8469.XP_007068838.1	Zinc finger HIT-type containing 6; Box C/D snoRNA protein 1	5.158	0.0255426	0.193873	0	2	11	24	0.91684	232916
PDCD11	8469.XP_007057934.1	Protein RRP5 homolog	4.3368	0.0282701	0.230585	0.418776	50	11	28.46	0.933264	322912
STRIP2	8469.XP_007069851.1	Striatin-interacting protein 2	5.81185	0	0.172062	1	3	14	4.66667	0.903763	0
MAATS1	8469.XP_007062169.1	MYCBP associated and testis expressed 1; Protein MAATS1	0	0	0	0	0	0	0	Infinity	0
RPAP1	8469.XP_007055868.1	RNA polymerase II-associated protein 1; The sequence of the model RefSeq protein was modified relative to its source genomic sequence to represent the inferred complete CDS: inserted 1 base in 1 codon	6.28482	0.000263248	0.159113	0	2	13	4.5	0.894304	504
TRANK1	8469.XP_007057285.1	TPR and ankyrin repeat-containing protein 1; Derived by automated computational analysis using gene prediction method: Gnomon. Supporting evidence includes similarity to: 4 mRNAs	0	0	0	0	0	0	0	Infinity	0
UY3_12346	8469.XP_007065548.1	Prenylcysteine oxidase-like	2.11111	0.222222	0.473684	0	2	3	3	0.814815	16
XP_007071371.1	8469.XP_007071371.1	Persulfide dioxygenase ETHE1	0	0	0	0	0	0	0	Infinity	0
STXBP4	8469.XP_007062847.1	Syntaxin-binding protein 4	0	0	0	0	0	0	0	Infinity	0
RTEL1	8469.XP_007062575.1	Regulator of telomere elongation helicase 1	5.85343	0	0.17084	0	1	13	4	0.902931	0
SPTBN4	8469.XP_007071834.1	Spectrin beta chain	1.75	0	0.571429	0	1	2	4	0.8125	0
SLC22A3	8469.XP_007065745.1	Solute carrier family 22 member 3	0	0	0	0	0	0	0	Infinity	0
XP_007063662.1	8469.XP_007063662.1	Uncharacterized protein LOC102929704	1	0	1	0	1	1	1	1	0
CFTR	8469.XP_007053191.1	Cystic fibrosis transmembrane conductance regulator; Epithelial ion channel that plays an important role in the regulation of epithelial ion and water transport and fluid homeostasis. Mediates the transport of chloride ions across the cell membrane. Channel activity is coupled to ATP hydrolysis. The ion channel is also permeable to HCO(3-); selectivity depends on the extracellular chloride concen…	1	0	1	0	1	1	1	1	0
GINM1	8469.XP_007057098.1	Glycoprotein integral membrane protein 1	0	0	0	0	0	0	0	Infinity	0
SUCLG2	8469.XP_007061537.1	succinyl-CoA ligase [GDP-forming] subunit beta	6.16008	0.0090668	0.162335	0	3	13	3.33333	0.896798	33318
ZW10	8469.XP_007060532.1	Centromere/kinetochore protein zw10 homolog	0	0	0	0	0	0	0	Infinity	0
KATNAL2	8469.XP_007055229.1	Katanin p60 ATPase-containing subunit A-like 2-like isoform X1	8.65489	0.002079	0.115542	0	2	15	4.5	0.846902	34276
NEIL3	8469.XP_007067162.1	Endonuclease 8-like 3	6.17775	0	0.161871	1	2	11	5	0.896445	0
CRNKL1	8469.XP_007063217.1	Crooked neck-like protein 1	4.77235	0.00478046	0.20954	0.394737	20	12	16.7	0.924553	63368
SLC51B	8469.XP_007053566.1	Uncharacterized protein; Organic solute transporter subunit beta	0	0	0	0	0	0	0	Infinity	0
ESCO2	8469.XP_007071393.1	N-acetyltransferase ESCO2	4.6341	0.00205812	0.215792	0.522876	18	12	24.5	0.927318	32108
LEPREL2	8469.XP_007069690.1	Prolyl 3-hydroxylase 3	0	0	0	0	0	0	0	Infinity	0
CASC5	8469.XP_007069471.1	Kinetochore scaffold 1; The sequence of the model RefSeq protein was modified relative to its source genomic sequence to represent the inferred complete CDS: substituted 1 base at 1 genomic stop codon	4.89605	8.38638e-05	0.204246	0.761905	7	12	26.5714	0.922079	1092
LEPREL4	8469.XP_007054775.1	Synaptonemal complex protein SC65	0	0	0	0	0	0	0	Infinity	0
COG1	8469.XP_007056143.1	Conserved oligomeric Golgi complex subunit 1	9.37214	0	0.106699	0	1	15	2	0.832557	0
LEPRE1	8469.XP_007065988.1	Prolyl 3-hydroxylase 1	1.25	0	0.8	1	3	2	3.33333	0.9375	0
AP1B1	8469.XP_007070919.1	AP-1 complex subunit beta-1-like isoform X1	5.56445	0.00829005	0.179712	0	2	13	18.5	0.908711	95330
TANGO2	8469.XP_007055013.1	Uncharacterized protein; Derived by automated computational analysis using gene prediction method: Gnomon. Supporting evidence includes similarity to: 13 Proteins	5.81497	0	0.17197	0	1	14	22	0.903701	0
SLC35C2	8469.XP_007067822.1	Solute carrier family 35 member C2	0	0	0	0	0	0	0	Infinity	0
ARRDC2	8469.XP_007072189.1	Arrestin domain-containing protein 2	0	0	0	0	0	0	0	Infinity	0
ARRDC1	8469.XP_007067697.1	Arrestin domain-containing protein 1	0	0	0	0	0	0	0	Infinity	0
ESCO1	8469.XP_007057064.1	Establishment of sister chromatid cohesion N-acetyltransferase 1; The sequence of the model RefSeq protein was modified relative to its source genomic sequence to represent the inferred complete CDS: deleted 2 bases in 1 codon; substituted 1 base at 1 genomic stop codon	4.93763	0.00013156	0.202526	0.571429	7	12	26	0.921247	2050
COG7	8469.XP_007058642.1	Conserved oligomeric Golgi complex subunit 7	8.37318	0.002079	0.119429	0	2	14	2	0.852536	10548
PDHX	8469.XP_007055313.1	Pyruvate dehydrogenase protein X component	7.11435	0	0.140561	1	2	14	3.5	0.877713	0
DYNC2H1	8469.XP_007057493.1	Cytoplasmic dynein 2 heavy chain 1	10.8711	0.0124243	0.091987	0.1	5	17	3.2	0.802578	213478
ARRDC4	8469.XP_007053602.1	Arrestin domain-containing protein 4	0	0	0	0	0	0	0	Infinity	0
SIL1	8469.XP_007059236.1	Nucleotide exchange factor SIL1	4.24636	0.0551928	0.235496	0.416667	24	12	22.1667	0.935073	605952
DENR	8469.XP_007058342.1	Density regulated re-initiation and release factor; Density-regulated protein	5.24948	0.00131324	0.190495	0.333333	3	13	21.6667	0.91501	9992
KAT8	8469.XP_007071310.1	Histone acetyltransferase KAT8; Belongs to the MYST (SAS/MOZ) family.	0	0	0	0	0	0	0	Infinity	0
FLAD1	8469.XP_007067889.1	Flavin adenine dinucleotide synthetase 1; FAD synthase	1	0	1	0	1	1	1	1	0
RPS6KA5	8469.XP_007055513.1	Ribosomal protein S6 kinase alpha-5 isoform X1	0	0	0	0	0	0	0	Infinity	0
TIAL1	8469.XP_007064294.1	Nucleolysin TIAR	6.08108	0.002079	0.164444	0	2	13	3.5	0.898378	9216
UY3_06591	8469.XP_007059360.1	Thyrotropin-releasing hormone receptor-like; Belongs to the G-protein coupled receptor 1 family.	0	0	0	0	0	0	0	Infinity	0
KIAA0930	8469.XP_007061805.1	Uncharacterized protein KIAA0930 homolog	0	0	0	0	0	0	0	Infinity	0
MLC1	8469.XP_007056928.1	Megalencephalic leukoencephalopathy with subcortical cysts 1; Membrane protein MLC1 isoform X1	0	0	0	0	0	0	0	Infinity	0
LRRFIP1	8469.XP_007069205.1	Leucine-rich repeat flightless-interacting protein 1	0	0	0	0	0	0	0	Infinity	0
PANK1	8469.XP_007071629.1	Pantothenate kinase 1 isoform X1	1	0	1	1	2	1	2	1	0
VARS	8469.XP_007070485.1	valyl-tRNA synthetase; valine--tRNA ligase	5.54782	0.00277679	0.180251	0.238095	7	13	6.14286	0.909044	31488
PANK2	8469.XP_007072751.1	Pantothenate kinase 2; The sequence of the model RefSeq protein was modified relative to its source genomic sequence to represent the inferred complete CDS: deleted 1 base in 1 codon	1	0	1	1	2	1	2	1	0
ISCA2	8469.XP_007065285.1	Iron-sulfur cluster assembly 2 homolog	1.75	0	0.571429	1	2	3	2.5	0.75	0
VEZT	8469.XP_007069289.1	Vezatin	0	0	0	0	0	0	0	Infinity	0
IFITM3	8469.XP_007056808.1	Interferon-induced transmembrane protein 3	0	0	0	0	0	0	0	Infinity	0
CCDC62	8469.XP_007058428.1	Coiled-coil domain-containing protein 62	7.39709	0	0.135188	0	1	15	3	0.872058	0
PPIL6	8469.XP_007057514.1	Peptidyl-prolyl cis-trans isomerase; PPIases accelerate the folding of proteins. It catalyzes the cis-trans isomerization of proline imidic peptide bonds in oligopeptides.	6.14449	0	0.162747	0	1	14	5	0.89711	0
CCDC61	8469.XP_007071043.1	Coiled-coil domain containing 61; The sequence of the model RefSeq protein was modified relative to its source genomic sequence to represent the inferred complete CDS: substituted 1 base at 1 genomic stop codon	7.14657	0.00608918	0.139927	0.4	6	14	4.66667	0.877069	106920
TNRC6A	8469.XP_007058641.1	Trinucleotide repeat containing 6A; Derived by automated computational analysis using gene prediction method: Gnomon. Supporting evidence includes similarity to: 1 mRNA	0	0	0	0	0	0	0	Infinity	0
CCDC60	8469.XP_007072043.1	Coiled-coil domain-containing protein 60	0	0	0	0	0	0	0	Infinity	0
POLR3K	8469.XP_007055902.1	DNA-directed RNA polymerase III subunit RPC10	5.07069	0.00374602	0.197212	0.214286	8	12	15.5	0.918586	29076
VPS45	8469.XP_007064631.1	Vacuolar protein sorting 45 homolog; The sequence of the model RefSeq protein was modified relative to its source genomic sequence to represent the inferred complete CDS: substituted 3 bases at 3 genomic stop codons	6.54886	0.0144363	0.152698	0.321429	8	13	4.75	0.889023	117708
CCDC66	8469.XP_007068260.1	Coiled-coil domain-containing protein 66; Derived by automated computational analysis using gene prediction method: Gnomon. Supporting evidence includes similarity to: 4 Proteins	1	0	1	0	1	1	1	1	0
CEBPZ	8469.XP_007058044.1	CCAAT/enhancer-binding protein zeta	4.51351	0.00226374	0.221557	0.806897	30	11	33.6333	0.92973	37096
DRG1	8469.XP_007061624.1	Developmentally-regulated GTP-binding protein 1; Derived by automated computational analysis using gene prediction method: Gnomon. Supporting evidence includes similarity to: 3 mRNAs	5.02911	0.00529912	0.198842	0.2	6	12	20.8333	0.919418	44056
RAB12	8469.XP_007062387.1	Ras-related protein Rab-12; Derived by automated computational analysis using gene prediction method: Gnomon. Supporting evidence includes similarity to: 1 mRNA	7.62786	0.00280041	0.131098	0	2	14	4	0.867443	13686
POLR3D	8469.XP_007066379.1	DNA-directed RNA polymerase III subunit RPC4	5.05821	0.00667258	0.197698	0.333333	7	12	24.2857	0.918836	71754
XP_007055845.1	8469.XP_007055845.1	Uncharacterized protein C15orf62 homolog	0	0	0	0	0	0	0	Infinity	0
RAB14	8469.XP_007061042.1	Ras-related protein Rab-14; Derived by automated computational analysis using gene prediction method: Gnomon. Supporting evidence includes similarity to: 1 mRNA	0	0	0	0	0	0	0	Infinity	0
MFAP1	8469.XP_007059588.1	Microfibrillar-associated protein 1	4.85239	0.00241669	0.206084	0.699346	18	12	19.4444	0.922952	38128
SNRNP40	8469.XP_007066158.1	U5 small nuclear ribonucleoprotein 40 kDa protein	4.84927	0.00850109	0.206217	0.494737	20	12	17.35	0.923015	64776
TNRC6C	8469.XP_007072581.1	Trinucleotide repeat-containing gene 6C protein; Derived by automated computational analysis using gene prediction method: Gnomon. Supporting evidence includes similarity to: 3 ESTs	5.75884	0.00828092	0.173646	0	3	13	6.33333	0.904823	39410
KBTBD11	8469.XP_007058812.1	Kelch repeat and BTB domain-containing protein 11; The sequence of the model RefSeq protein was modified relative to its source genomic sequence to represent the inferred complete CDS: inserted 1 base in 1 codon; substituted 1 base at 1 genomic stop codon	0	0	0	0	0	0	0	Infinity	0
XP_007053799.1	8469.XP_007053799.1	Serine/threonine-protein kinase mTOR-like	4.45738	0.0648765	0.224347	0.0909091	11	10	7.90909	0.930852	416108
FBXL13	8469.XP_007063862.1	F-box/LRR-repeat protein 13	0	0	0	0	0	0	0	Infinity	0
XP_007055532.1	8469.XP_007055532.1	Myelin-oligodendrocyte glycoprotein-like	0	0	0	0	0	0	0	Infinity	0
AMFR	8469.XP_007070642.1	Autocrine motility factor receptor; E3 ubiquitin-protein ligase AMFR	6.85551	0	0.145868	0	1	14	2	0.88289	0
CEP152	8469.XP_007066863.1	Centrosomal protein of 152 kDa	5.63514	0.0145033	0.177458	0.5	4	13	10	0.907297	190952
CCDC57	8469.XP_007063449.1	Coiled-coil domain-containing protein 57; The sequence of the model RefSeq protein was modified relative to its source genomic sequence to represent the inferred complete CDS: deleted 1 base in 1 codon	0	0	0	0	0	0	0	Infinity	0
PPIL2	8469.XP_007055087.1	Peptidyl-prolyl cis-trans isomerase-like 2	0	0	0	0	0	0	0	Infinity	0
PPIL1	8469.XP_007070362.1	Peptidyl-prolyl cis-trans isomerase; PPIases accelerate the folding of proteins. It catalyzes the cis-trans isomerization of proline imidic peptide bonds in oligopeptides.	5.14137	3.10491e-05	0.194501	0.8	6	13	19.8333	0.917173	1478
ANGPT4	8469.XP_007062564.1	Angiopoietin-4	0	0	0	0	0	0	0	Infinity	0
TUB	8469.XP_007057162.1	Tubby protein homolog; Belongs to the TUB family.	1	0	1	0	1	1	1	1	0
JAZF1	8469.XP_007053705.1	Juxtaposed with another zinc finger protein 1	0	0	0	0	0	0	0	Infinity	0
ZNF740	8469.XP_007058585.1	Uncharacterized protein; Derived by automated computational analysis using gene prediction method: Gnomon. Supporting evidence includes similarity to: 1 mRNA	0	0	0	0	0	0	0	Infinity	0
SLC13A5	8469.XP_007054242.1	Solute carrier family 13 member 5	0	0	0	0	0	0	0	Infinity	0
ASCC3	8469.XP_007066417.1	Activating signal cointegrator 1 complex subunit 3; The sequence of the model RefSeq protein was modified relative to its source genomic sequence to represent the inferred complete CDS: inserted 1 base in 1 codon	5.36383	2.40375e-06	0.186434	0.666667	3	13	21	0.912723	16
POLR2G	8469.XP_007056946.1	DNA-directed RNA polymerase II subunit RPB7	4.96778	0.00341482	0.201297	0.435897	13	11	8.30769	0.920644	23008
VPS54	8469.XP_007062939.1	VPS54	7.19127	0.00363121	0.139058	0.333333	4	13	6.25	0.876175	30240
POLR2F	8469.XP_007069192.1	DNA-directed RNA polymerases I	4.48441	0.0346933	0.222995	0.221053	20	11	16.7	0.930312	360900
UY3_04895	8469.XP_007057583.1	Uridine-cytidine kinase-like 1-like; Belongs to the uridine kinase family.	8.52807	0	0.11726	0	1	16	2	0.849439	0
IL21R	8469.XP_007063738.1	Interleukin-21 receptor	0	0	0	0	0	0	0	Infinity	0
VPS52	8469.XP_007069614.1	VPS52	7.51455	0.0103669	0.133075	0.1	5	14	3.4	0.869709	86884
HECTD3	8469.XP_007061729.1	E3 ubiquitin-protein ligase HECTD3	0	0	0	0	0	0	0	Infinity	0
HECTD2	8469.XP_007059472.1	Probable E3 ubiquitin-protein ligase HECTD2	0	0	0	0	0	0	0	Infinity	0
ABLIM3	8469.XP_007062438.1	Actin-binding LIM protein 3	0	0	0	0	0	0	0	Infinity	0
RAB20	8469.XP_007063971.1	Ras-related protein Rab-20	2	0	0.5	0	1	3	2	0.5	0
ABLIM2	8469.XP_007056583.1	Actin binding LIM protein family member 2; The sequence of the model RefSeq protein was modified relative to its source genomic sequence to represent the inferred complete CDS: deleted 1 base in 1 codon	0	0	0	0	0	0	0	Infinity	0
ABLIM1	8469.XP_007056388.1	Actin-binding LIM protein 1	0	0	0	0	0	0	0	Infinity	0
DNAJB1	8469.XP_007069227.1	dnaJ homolog subfamily B member 1	5.73597	0.002079	0.174339	0.333333	3	13	5	0.905281	9722
LMF1	8469.XP_007060126.1	Lipase maturation factor 1	5.54574	0.002079	0.180319	0	2	12	13.5	0.909085	16278
TMA16	8469.XP_007071367.1	Translation machinery-associated protein 16	1.5	0	0.666667	0	1	2	2	0.75	0
THSD4	8469.XP_007056454.1	Thrombospondin type-1 domain-containing protein 4	0	0	0	0	0	0	0	Infinity	0
TTL	8469.XP_007058999.1	Tubulin--tyrosine ligase	0	0	0	0	0	0	0	Infinity	0
CEBPG	8469.XP_007058706.1	CCAAT/enhancer-binding protein gamma	0	0	0	0	0	0	0	Infinity	0
EI24	8469.XP_007066427.1	Etoposide-induced protein 2.4 like protein; The sequence of the model RefSeq protein was modified relative to its source genomic sequence to represent the inferred complete CDS: deleted 1 base in 1 codon	0	0	0	0	0	0	0	Infinity	0
SMPX	8469.XP_007070540.1	Small muscular protein; Derived by automated computational analysis using gene prediction method: Gnomon. Supporting evidence includes similarity to: 3 Proteins	5.66216	0	0.176611	0	1	12	12	0.906757	0
MTFP1	8469.XP_007068606.1	Mitochondrial fission process protein 1	0	0	0	0	0	0	0	Infinity	0
HDAC3	8469.XP_007060327.1	Histone deacetylase 3	5.61019	0.00128739	0.178247	0.2	5	12	6.8	0.907796	11004
TSSC4	8469.XP_007063022.1	Protein TSSC4	5.35031	0.002079	0.186905	0.5	4	13	19.5	0.912994	18808
UY3_07246	8469.XP_007060049.1	Histone H1x-like	5.58628	0.00415584	0.17901	0	3	12	13.3333	0.908274	24874
HDAC2	8469.XP_007057484.1	Histone deacetylase 2	5.27235	0.00891657	0.189669	0.107143	8	12	6.125	0.914553	44392
CATSPER3	8469.XP_007053668.1	Cation channel sperm-associated protein 3	0	0	0	0	0	0	0	Infinity	0
HDAC5	8469.XP_007062064.1	Histone deacetylase 5	1	0	1	0	1	1	1	1	0
CCDC40	8469.XP_007056126.1	Coiled-coil domain-containing protein 40	6.67152	0.00744335	0.149891	0	4	12	4.25	0.88657	98288
CLCN2	8469.XP_007068451.1	Chloride channel protein 2	0	0	0	0	0	0	0	Infinity	0
MTFR2	8469.XP_007058125.1	Mitochondrial fission regulator 2	0	0	0	0	0	0	0	Infinity	0
XP_007062170.1	8469.XP_007062170.1	Cytochrome c oxidase copper chaperone-like	6.28586	0	0.159087	0	1	14	7	0.894283	0
MTFR1	8469.XP_007061503.1	Mitochondrial fission regulator 1	0	0	0	0	0	0	0	Infinity	0
MCM5	8469.XP_007062734.1	DNA helicase; The sequence of the model RefSeq protein was modified relative to its source genomic sequence to represent the inferred complete CDS: substituted 1 base at 1 genomic stop codon; Belongs to the MCM family.	4.36383	0.047637	0.229157	0.219512	42	12	15.9762	0.932723	435978
POLR1E	8469.XP_007068769.1	DNA-directed RNA polymerase I subunit RPA49	4.53534	0.00751057	0.22049	0.693548	32	11	32.0938	0.929293	70608
PECAM1	8469.XP_007055194.1	Platelet endothelial cell adhesion molecule	5.29418	0.0255862	0.188887	0	4	12	7.25	0.914116	123476
ESPL1	8469.XP_007058605.1	Separin	4.70894	0.00203801	0.212362	0.406154	26	12	19.6923	0.925821	23438
SMC1B	8469.XP_007061821.1	Structural maintenance of chromosomes protein 1B	5.20998	0.000279573	0.191939	0.666667	9	12	18.8889	0.9158	5264
FAM219A	8469.XP_007066599.1	Family with sequence similarity 219 member A; Protein FAM219A	0	0	0	0	0	0	0	Infinity	0
EDF1	8469.XP_007067721.1	Endothelial differentiation-related factor 1 homolog	5.14657	3.26993e-05	0.194304	0.833333	4	13	10.25	0.917069	208
HAUS3	8469.XP_007056038.1	HAUS augmin-like complex subunit 3	0	0	0	0	0	0	0	Infinity	0
FAM219B	8469.XP_007065914.1	Family with sequence similarity 219 member B; Protein FAM219B	0	0	0	0	0	0	0	Infinity	0
COBL	8469.XP_007061421.1	Protein cordon-bleu	1.6	0.4	0.625	0	2	2	2.5	0.85	8
FAAH2	8469.XP_007056313.1	Fatty-acid amide hydrolase 2-like	2	0.47619	0.5	0.333333	3	4	2.33333	0.666667	20
CTDSPL	8469.XP_007066609.1	CTD small phosphatase-like protein isoform X1	0	0	0	0	0	0	0	Infinity	0
DIS3	8469.XP_007058776.1	Exosome complex exonuclease RRP44; The sequence of the model RefSeq protein was modified relative to its source genomic sequence to represent the inferred complete CDS: deleted 1 base in 1 codon	4.99792	0.00538322	0.200083	0.142857	7	12	16.4286	0.920042	44628
RFC1	8469.XP_007066487.1	Replication factor C subunit 1	4.96881	6.37526e-05	0.201255	0.821429	8	12	26.75	0.920624	1520
UY3_00785	8469.XP_007053285.1	Sorbin and SH3 domain-containing protein 1-like isoform X1	6.87422	0	0.145471	0	1	13	7	0.882516	0
ADSL	8469.XP_007053398.1	Adenylosuccinate lyase	5.33888	0.041349	0.187305	0.125	16	13	6.25	0.913222	942418
PLA2G12A	8469.XP_007054477.1	Group XIIA secretory phospholipase A2	3.42105	0	0.292308	0	1	5	4	0.394737	0
TTC23L	8469.XP_007064156.1	Tetratricopeptide repeat protein 23-like	0	0	0	0	0	0	0	Infinity	0
ADAMTS9	8469.XP_007066035.1	A disintegrin and metalloproteinase with thrombospondin motifs 9; The sequence of the model RefSeq protein was modified relative to its source genomic sequence to represent the inferred complete CDS: deleted 1 base in 1 codon	0	0	0	0	0	0	0	Infinity	0
UY3_05665	8469.XP_007058383.1	Endoplasmic reticulum resident protein 29-like	2.22222	0	0.45	1	2	4	4	0.796296	0
CEP170	8469.XP_007058025.1	Centrosomal protein of 170 kDa isoform X1	0	0	0	0	0	0	0	Infinity	0
UY3_05082	8469.XP_007057831.1	GTPase Era	5.67983	1.0986e-05	0.176061	0.333333	3	13	11	0.906403	96
UY3_19033	8469.XP_007072441.1	Programmed cell death protein 4; Uncharacterized protein LOC102941005	5.78482	0	0.172866	0	1	13	6	0.904304	0
RNPEP	8469.XP_007054394.1	Aminopeptidase B	0	0	0	0	0	0	0	Infinity	0
ADAMTS1	8469.XP_007070802.1	ADAM metallopeptidase with thrombospondin type 1 motif 1; The sequence of the model RefSeq protein was modified relative to its source genomic sequence to represent the inferred complete CDS: inserted 1 base in 1 codon	2.14286	0.47619	0.466667	0	2	4	2.5	0.619048	20
SNRNP70	8469.XP_007054760.1	U1 small nuclear ribonucleoprotein 70 kDa	4.94699	0.0184262	0.202143	0.248366	18	13	12.5	0.92106	151414
PSTPIP2	8469.XP_007055245.1	Proline-serine-threonine phosphatase-interacting protein 2	0	0	0	0	0	0	0	Infinity	0
ADAMTS2	8469.XP_007071581.1	A disintegrin and metalloproteinase with thrombospondin motifs 2	0	0	0	0	0	0	0	Infinity	0
PSTPIP1	8469.XP_007068428.1	Proline-serine-threonine phosphatase-interacting protein 1	0	0	0	0	0	0	0	Infinity	0
SYNE1	8469.XP_007060401.1	Nesprin-1; Derived by automated computational analysis using gene prediction method: Gnomon. Supporting evidence includes similarity to: 10 mRNAs	0	0	0	0	0	0	0	Infinity	0
SYNE2	8469.XP_007068085.1	Spectrin repeat containing nuclear envelope protein 2; The sequence of the model RefSeq protein was modified relative to its source genomic sequence to represent the inferred complete CDS: inserted 1 base in 1 codon	0	0	0	0	0	0	0	Infinity	0
UY3_17117	8469.XP_007070462.1	sororin-B-like	4.79418	7.47763e-05	0.208586	0.763636	11	12	26.3636	0.924116	1034
PIK3C2A	8469.XP_007057153.1	Phosphatidylinositol-4-phosphate 3-kinase C2 domain-containing subunit alpha; The sequence of the model RefSeq protein was modified relative to its source genomic sequence to represent the inferred complete CDS: substituted 1 base at 1 genomic stop codon; Belongs to the PI3/PI4-kinase family.	5.18711	0.0014099	0.192786	0.5	4	13	11.25	0.916258	19826
CBWD1	8469.XP_007065637.1	COBW domain-containing protein 1	0	0	0	0	0	0	0	Infinity	0
PIK3C2G	8469.XP_007071263.1	Phosphatidylinositol-4-phosphate 3-kinase C2 domain-containing subunit gamma; Derived by automated computational analysis using gene prediction method: Gnomon. Supporting evidence includes similarity to: 3 mRNAs	5.18815	0.000465396	0.192747	0.666667	3	13	14.6667	0.916237	11172
COL14A1	8469.XP_007063457.1	Collagen alpha-1(XIV) chain isoform X1	0	0	0	0	0	0	0	Infinity	0
MCM8	8469.XP_007068858.1	DNA replication licensing factor MCM8; DNA helicase MCM8; Belongs to the MCM family.	4.91476	0.000185279	0.203469	0.576923	13	12	21.6923	0.921705	2384
MAP3K12	8469.XP_007065875.1	Mitogen-activated protein kinase kinase kinase 12	0	0	0	0	0	0	0	Infinity	0
LHX8	8469.XP_007062652.1	LIM/homeobox protein Lhx8	2.14286	0.47619	0.466667	0	2	4	2.5	0.619048	20
CNIH4	8469.XP_007071778.1	Cornichon family AMPA receptor auxiliary protein 4; Protein cornichon homolog 4 isoform X1	2	0	0.5	0	1	3	4	0.75	0
MAP3K14	8469.XP_007053884.1	Mitogen-activated protein kinase kinase kinase 14	6.03119	0.00978911	0.165805	0	3	13	4.33333	0.899376	102080
SLC26A4	8469.XP_007065734.1	Pendrin	7.1632	0.000482541	0.139602	0	2	13	4	0.876736	1460
PLXNB2	8469.XP_007056919.1	Plexin B2; Derived by automated computational analysis using gene prediction method: Gnomon. Supporting evidence includes similarity to: 1 mRNA	1	0	1	0	1	1	1	1	0
PLEKHM1	8469.XP_007053880.1	Pleckstrin like proteiny domain-containing family M member 1; Derived by automated computational analysis using gene prediction method: Gnomon. Supporting evidence includes similarity to: 1 mRNA	0	0	0	0	0	0	0	Infinity	0
PDCL	8469.XP_007061029.1	Phosducin-like protein; Derived by automated computational analysis using gene prediction method: Gnomon. Supporting evidence includes similarity to: 1 EST	0	0	0	0	0	0	0	Infinity	0
REEP2	8469.XP_007065036.1	Receptor expression-enhancing protein; Derived by automated computational analysis using gene prediction method: Gnomon. Supporting evidence includes similarity to: 28 Proteins	0	0	0	0	0	0	0	Infinity	0
P4HA3	8469.XP_007072425.1	Prolyl 4-hydroxylase subunit alpha-3	1	0	1	0	1	1	1	1	0
MAP3K19	8469.XP_007060941.1	Mitogen-activated protein kinase kinase kinase 19	0	0	0	0	0	0	0	Infinity	0
UY3_17889	8469.XP_007071227.1	C-type lectin domain family 2 member D-like	0	0	0	0	0	0	0	Infinity	0
REEP4	8469.XP_007066384.1	Receptor accessory protein 4; The sequence of the model RefSeq protein was modified relative to its source genomic sequence to represent the inferred complete CDS: substituted 1 base at 1 genomic stop codon	0	0	0	0	0	0	0	Infinity	0
P4HA1	8469.XP_007060721.1	Prolyl 4-hydroxylase subunit alpha-1 isoform X1	1	0	1	0	1	1	1	1	0
DAB2	8469.XP_007065789.1	Disabled homolog 2 isoform X1	6.33888	0.00843637	0.157757	0.2	5	14	3	0.893222	69626
UBOX5	8469.XP_007067202.1	RING finger protein 37; Derived by automated computational analysis using gene prediction method: Gnomon. Supporting evidence includes similarity to: 4 Proteins; Belongs to the vasopressin/oxytocin family.	5.85343	0	0.17084	0	1	13	4	0.902931	0
LRFN2	8469.XP_007071743.1	Leucine-rich repeat and fibronectin type-III domain-containing protein 2	0	0	0	0	0	0	0	Infinity	0
RBM10	8469.XP_007069634.1	RNA binding motif protein 10; The sequence of the model RefSeq protein was modified relative to its source genomic sequence to represent the inferred complete CDS: substituted 1 base at 1 genomic stop codon	0	0	0	0	0	0	0	Infinity	0
TRAPPC5	8469.XP_007072541.1	Trafficking protein particle complex subunit 5	1	1	1	0	2	1	1	1	2
TMEM132A	8469.XP_007071863.1	Transmembrane protein 132A	0	0	0	0	0	0	0	Infinity	0
CCDC15	8469.XP_007066637.1	Coiled-coil domain-containing protein 15	0	0	0	0	0	0	0	Infinity	0
CCDC14	8469.XP_007057122.1	Coiled-coil domain-containing protein 14	0	0	0	0	0	0	0	Infinity	0
FANCM	8469.XP_007066723.1	Fanconi anemia group M protein	4.66736	0.005368	0.214254	0.387681	24	11	16.4167	0.926653	69894
OSBPL5	8469.XP_007063017.1	Oxysterol-binding protein-related protein 5	0	0	0	0	0	0	0	Infinity	0
CHTOP	8469.XP_007067873.1	Chromatin target of PRMT1 protein isoform X1	5.78274	0.000679032	0.172928	0.666667	6	14	12.3333	0.904345	5156
CEP112	8469.XP_007055147.1	Uncharacterized protein; Derived by automated computational analysis using gene prediction method: Gnomon. Supporting evidence includes similarity to: 1 mRNA	1	0	1	0	1	1	1	1	0
OSBPL7	8469.XP_007062088.1	Oxysterol-binding protein-related protein 7	0	0	0	0	0	0	0	Infinity	0
TMEM132C	8469.XP_007068637.1	Transmembrane protein 132C	0	0	0	0	0	0	0	Infinity	0
MPDZ	8469.XP_007053494.1	Multiple PDZ domain crumbs cell polarity complex component; The sequence of the model RefSeq protein was modified relative to its source genomic sequence to represent the inferred complete CDS: substituted 1 base at 1 genomic stop codon	0	0	0	0	0	0	0	Infinity	0
KLHL20	8469.XP_007061239.1	Kelch-like protein 20	0	0	0	0	0	0	0	Infinity	0
DRD2	8469.XP_007060533.1	D(2) dopamine receptor isoform X1; Belongs to the G-protein coupled receptor 1 family.	0	0	0	0	0	0	0	Infinity	0
RAB6A	8469.XP_007062356.1	RAB6A	8.50936	0.00415584	0.117518	0	3	15	2.33333	0.849813	34762
SRGAP3	8469.XP_007059996.1	SLIT-ROBO Rho GTPase-activating protein 3 isoform X1	0	0	0	0	0	0	0	Infinity	0
XP_007053738.1	8469.XP_007053738.1	Complement receptor type 1-like	0	0	0	0	0	0	0	Infinity	0
CCDC30	8469.XP_007068891.1	Coiled-coil domain-containing protein 30	0	0	0	0	0	0	0	Infinity	0
ORC3	8469.XP_007071869.1	Origin recognition complex subunit 3	5.13202	3.45656e-05	0.194855	0.466667	6	12	16.8333	0.91736	366
UBR7	8469.XP_007055520.1	Putative E3 ubiquitin-protein ligase UBR7	6.64033	0	0.150595	0	1	13	5	0.887193	0
ORC6	8469.XP_007059705.1	Origin recognition complex subunit 6	5.0894	4.68925e-05	0.196487	0.428571	7	12	17	0.918212	342
KIAA0556	8469.XP_007055884.1	Uncharacterized protein KIAA0556 homolog	0	0	0	0	0	0	0	Infinity	0
UY3_10687	8469.XP_007063780.1	Threonine synthase-like 2-like	0	0	0	0	0	0	0	Infinity	0
UBR2	8469.XP_007058088.1	E3 ubiquitin-protein ligase UBR2 isoform X1	5.64137	0.00347884	0.177262	0	5	12	4.6	0.907173	18018
GLT8D2	8469.XP_007066185.1	Glycosyltransferase 8 domain-containing protein 2	0	0	0	0	0	0	0	Infinity	0
UY3_18661	8469.XP_007072053.1	Zinc finger protein 135-like	0	0	0	0	0	0	0	Infinity	0
XP_007072376.1	8469.XP_007072376.1	Poly [ADP-ribose] polymerase 12-like	0	0	0	0	0	0	0	Infinity	0
CEP104	8469.XP_007070218.1	Centrosomal protein of 104 kDa	0	0	0	0	0	0	0	Infinity	0
SREK1	8469.XP_007059067.1	Splicing regulatory glutamine/lysine-rich protein 1; The sequence of the model RefSeq protein was modified relative to its source genomic sequence to represent the inferred complete CDS: inserted 1 base in 1 codon	5.58108	0.0023681	0.179177	0.133333	6	13	7	0.908378	13370
UY3_17175	8469.XP_007070493.1	Uncharacterized protein; torsin-4A-A-like	0	0	0	0	0	0	0	Infinity	0
UY3_17822	8469.XP_007071180.1	Uncharacterized protein C1orf131 homolog	0	0	0	0	0	0	0	Infinity	0
RAB34	8469.XP_007057752.1	Ras-related protein Rab-34; Derived by automated computational analysis using gene prediction method: Gnomon. Supporting evidence includes similarity to: 16 Proteins	8.51351	0	0.11746	0	1	15	5	0.84973	0
UY3_16370	8469.XP_007069645.1	3-ketosteroid-9-alpha-hydroxylase oxygenase subunit; Cholesterol desaturase daf-36-like	0	0	0	0	0	0	0	Infinity	0
EBNA1BP2	8469.XP_007061568.1	Probable rRNA-processing protein EBP2	4.53846	0.00647824	0.220339	0.583333	40	11	29.125	0.929231	113210
RAB30	8469.XP_007060652.1	Ras-related protein Rab-30	0	0	0	0	0	0	0	Infinity	0
ILF2	8469.XP_007067877.1	Interleukin enhancer-binding factor 2; Derived by automated computational analysis using gene prediction method: Gnomon. Supporting evidence includes similarity to: 9 ESTs	5.85967	0.00265432	0.170658	0.535714	8	14	11.125	0.902807	15374
FAM91A1	8469.XP_007070072.1	Protein FAM91A1-like	4.57895	0	0.218391	0	1	8	2	0.105263	0
THNSL1	8469.XP_007058541.1	Threonine synthase-like 1	0	0	0	0	0	0	0	Infinity	0
LEMD3	8469.XP_007069792.1	Inner nuclear membrane protein Man1	5.21726	0.00444846	0.191672	0	4	13	6.75	0.915655	33816
VRK2	8469.XP_007053335.1	Serine/threonine-protein kinase VRK2; The sequence of the model RefSeq protein was modified relative to its source genomic sequence to represent the inferred complete CDS: inserted 2 bases in 1 codon; substituted 1 base at 1 genomic stop codon	0	0	0	0	0	0	0	Infinity	0
THOC2	8469.XP_007060192.1	THO complex subunit 2	4.98857	0.0123383	0.200458	0.2	5	12	8.2	0.920229	93194
KERA	8469.XP_007059263.1	Keratocan	0	0	0	0	0	0	0	Infinity	0
DIO3	8469.XP_007072789.1	Iodothyronine deiodinase 3; The sequence of the model RefSeq protein was modified relative to its source genomic sequence to represent the inferred complete CDS: substituted 1 base at 1 genomic stop codon	0	0	0	0	0	0	0	Infinity	0
TTC21A	8469.XP_007059499.1	Tetratricopeptide repeat protein 21B; The sequence of the model RefSeq protein was modified relative to its source genomic sequence to represent the inferred complete CDS: inserted 1 base in 1 codon; Belongs to the peptidase S1 family.	12.8617	0	0.0777499	0	1	19	5	0.762765	0
TRAFD1	8469.XP_007058385.1	TRAF-type zinc finger domain-containing protein 1	0	0	0	0	0	0	0	Infinity	0
VASH2	8469.XP_007064819.1	Vasohibin-2 isoform X1	0	0	0	0	0	0	0	Infinity	0
SPICE1	8469.XP_007062161.1	Spindle and centriole-associated protein 1	7.59356	0.00356389	0.131691	0.166667	4	14	2.5	0.868129	21524
USP3	8469.XP_007070080.1	Ubiquitin carboxyl-terminal hydrolase 3; Belongs to the peptidase C19 family.	1.75	0	0.571429	0	1	2	4	0.8125	0
CEP135	8469.XP_007071105.1	Uncharacterized protein; Derived by automated computational analysis using gene prediction method: Gnomon. Supporting evidence includes similarity to: 1 mRNA	6.47817	0.0278096	0.154365	0.133333	6	14	3.83333	0.890437	417704
RAB2B	8469.XP_007071454.1	Ras-related protein Rab-2B	0	0	0	0	0	0	0	Infinity	0
IFNAR2	8469.XP_007063648.1	Interferon alpha/beta receptor 2	1	0	1	0	1	1	1	1	0
MB21D2	8469.XP_007057894.1	Protein MB21D2	0	0	0	0	0	0	0	Infinity	0
SLC26A10	8469.XP_007053421.1	Solute carrier family 26 member 10	0	0	0	0	0	0	0	Infinity	0
SLC26A11	8469.XP_007056128.1	Sodium-independent sulfate anion transporter	0	0	0	0	0	0	0	Infinity	0
LSM1	8469.XP_007053533.1	U6 snRNA-associated Sm-like protein LSm1	4.85239	0.00364531	0.206084	0.464286	8	12	15.625	0.922952	31074
PAPOLA	8469.XP_007065028.1	poly(A) polymerase alpha	5.53534	0.00622403	0.180657	0	2	13	7.5	0.909293	31830
XP_007062051.1	8469.XP_007062051.1	Uncharacterized protein LOC102933496	4.75364	0.0133845	0.210365	0.531579	20	12	20.85	0.924927	137110
UY3_14250	8469.XP_007067422.1	Centrin-2-like	6.62266	0	0.150997	1	2	13	4.5	0.887547	0
UY3_01137	8469.XP_007053642.1	Core histone macro-H2A.1; Derived by automated computational analysis using gene prediction method: Gnomon. Supporting evidence includes similarity to: 10 ESTs	6.58524	0	0.151855	0	1	13	3	0.888295	0
XP_007062857.1	8469.XP_007062857.1	Coxsackievirus and adenovirus receptor homolog	0	0	0	0	0	0	0	Infinity	0
LAMP1	8469.XP_007063955.1	Lysosome-associated membrane glycoprotein 1	7.14241	0	0.140009	0	1	13	5	0.877152	0
RIMS3	8469.XP_007060769.1	Regulating synaptic membrane exocytosis protein 3	0	0	0	0	0	0	0	Infinity	0
UY3_14377	8469.XP_007067545.1	Ribonuclease-like; Belongs to the pancreatic ribonuclease family.	0	0	0	0	0	0	0	Infinity	0
UY3_07355	8469.XP_007060173.1	A-kinase anchor protein 17B; Derived by automated computational analysis using gene prediction method: Gnomon. Supporting evidence includes similarity to: 1 mRNA	4.47368	0	0.223529	0	1	8	3	0.131579	0
PROSC	8469.XP_007053544.1	Proline synthetase cotranscribed homolog (bacterial); Proline synthase co-transcribed bacterial homolog protein	5.96258	0.00356574	0.167713	0	3	14	8.33333	0.900748	42524
CDC14A	8469.XP_007062674.1	Dual specificity protein phosphatase CDC14A	5.09667	0	0.196206	1	2	12	28.5	0.918067	0
TMEM179B	8469.XP_007056956.1	Transmembrane protein 179B	0	0	0	0	0	0	0	Infinity	0
CSF1	8469.XP_007063583.1	Macrophage colony-stimulating factor 1	7.10915	0.00724838	0.140664	0	4	14	2.75	0.877817	39492
PLXND1	8469.XP_007060070.1	plexin-D1	1	0	1	0	1	1	1	1	0
POGLUT1	8469.XP_007060881.1	Protein O-glucosyltransferase 1	1	0	1	0	1	1	1	1	0
OXNAD1	8469.XP_007053332.1	Oxidoreductase NAD-binding domain-containing protein 1	0	0	0	0	0	0	0	Infinity	0
KIAA1377	8469.XP_007070840.1	Uncharacterized protein KIAA1377 homolog	1	0	1	0	1	1	1	1	0
CCDC71L	8469.XP_007064724.1	Coiled-coil domain-containing protein 71L	0	0	0	0	0	0	0	Infinity	0
ADCK3	8469.XP_007071819.1	Chaperone activity of bc1 complex-like	8.59044	0	0.116409	0	1	15	5	0.848191	0
ADM2	8469.XP_007066839.1	ADM2	7.54886	0	0.13247	0	1	15	3	0.869023	0
NFIC	8469.XP_007070094.1	Nuclear factor 1 C-type; The sequence of the model RefSeq protein was modified relative to its source genomic sequence to represent the inferred complete CDS: deleted 1 base in 1 codon; substituted 1 base at 1 genomic stop codon	0	0	0	0	0	0	0	Infinity	0
NFIA	8469.XP_007059106.1	Nuclear factor 1 A-type; The sequence of the model RefSeq protein was modified relative to its source genomic sequence to represent the inferred complete CDS: substituted 1 base at 1 genomic stop codon	0	0	0	0	0	0	0	Infinity	0
HIPK3	8469.XP_007067946.1	Homeodomain-interacting protein kinase 3 isoform X1	5.12786	0	0.195013	0	1	11	32	0.917443	0
RRP1B	8469.XP_007064497.1	Ribosomal RNA processing protein 1 like protein B; The sequence of the model RefSeq protein was modified relative to its source genomic sequence to represent the inferred complete CDS: deleted 2 bases in 1 codon	4.61227	0.00504533	0.216813	0.647619	36	11	29.9722	0.927755	62026
NR1H3	8469.XP_007054354.1	Oxysterols receptor LXR-alpha; Derived by automated computational analysis using gene prediction method: Gnomon. Supporting evidence includes similarity to: 4 mRNAs	0	0	0	0	0	0	0	Infinity	0
FAM101B	8469.XP_007057712.1	Protein FAM101B	0	0	0	0	0	0	0	Infinity	0
PCGF3	8469.XP_007056906.1	Polycomb group RING finger protein 3	1.5	0	0.666667	0	1	2	2	0.75	0
XP_007068918.1	8469.XP_007068918.1	Uncharacterized protein LOC102933829	0	0	0	0	0	0	0	Infinity	0
DMTN	8469.XP_007066367.1	Dematin isoform X1	0	0	0	0	0	0	0	Infinity	0
ZNF341	8469.XP_007057211.1	Zinc finger protein 341	0	0	0	0	0	0	0	Infinity	0
LDLR	8469.XP_007055940.1	Low density lipoprotein receptor; The sequence of the model RefSeq protein was modified relative to its source genomic sequence to represent the inferred complete CDS: inserted 2 bases in 1 codon	5.35967	0.0263333	0.186579	0	4	13	11.5	0.912807	188840
PPP1R8	8469.XP_007066166.1	Nuclear inhibitor of protein phosphatase 1	5.99064	0.00667717	0.166927	0.166667	4	13	2.5	0.900187	30080
OLFML1	8469.XP_007058751.1	Olfactomedin-like protein 1	0	0	0	0	0	0	0	Infinity	0
PPP1R7	8469.XP_007067429.1	Protein phosphatase 1 regulatory subunit 7; Derived by automated computational analysis using gene prediction method: Gnomon. Supporting evidence includes similarity to: 21 ESTs	6.9896	0	0.14307	0	1	14	4	0.880208	0
ABI3BP	8469.XP_007061674.1	ABI family member 3 binding protein; Target of Nesh-SH3	0	0	0	0	0	0	0	Infinity	0
OLFML3	8469.XP_007059660.1	Olfactomedin-like protein 3	0	0	0	0	0	0	0	Infinity	0
FGD6	8469.XP_007069307.1	FYVE	0	0	0	0	0	0	0	Infinity	0
ARFRP1	8469.XP_007062576.1	ADP-ribosylation factor-related protein 1; Belongs to the small GTPase superfamily. Arf family.	0	0	0	0	0	0	0	Infinity	0
ADCY5	8469.XP_007071946.1	Adenylate cyclase type 5; The sequence of the model RefSeq protein was modified relative to its source genomic sequence to represent the inferred complete CDS: inserted 1 base in 1 codon; deleted 1 base in 1 codon; Belongs to the adenylyl cyclase class-4/guanylyl cyclase family.	7.22245	0.000516209	0.138457	0	5	15	5.8	0.875551	70608
ADCY6	8469.XP_007064789.1	Adenylate cyclase type 6	7.22245	0.000516209	0.138457	0	5	15	5.8	0.875551	70608
PDC	8469.XP_007056756.1	Phosducin	1.66667	0	0.6	0	1	2	3	0.777778	0
PAPSS2	8469.XP_007071656.1	Bifunctional 3'-phosphoadenosine 5'-phosphosulfate synthase 2; The sequence of the model RefSeq protein was modified relative to its source genomic sequence to represent the inferred complete CDS: deleted 1 base in 1 codon	1	0	1	0	1	1	1	1	0
WDR24	8469.XP_007055885.1	WD repeat-containing protein 24	6.14345	0.00446987	0.162775	0.2	5	12	4.8	0.897131	24634
ADCY3	8469.XP_007066982.1	Adenylate cyclase type 3; The sequence of the model RefSeq protein was modified relative to its source genomic sequence to represent the inferred complete CDS: substituted 1 base at 1 genomic stop codon	7.18919	0.0192533	0.139098	0.0277778	9	15	4.44444	0.876216	830898
WDR20	8469.XP_007062956.1	WD repeat-containing protein 20 isoform X1	0	0	0	0	0	0	0	Infinity	0
UY3_05025	8469.XP_007057799.1	Pinopsin-like	0	0	0	0	0	0	0	Infinity	0
PRUNE	8469.XP_007068207.1	Protein prune homolog	6.07796	0	0.164529	0	1	14	5	0.898441	0
UY3_05028	8469.XP_007057711.1	Uncharacterized protein C17orf97 homolog	0	0	0	0	0	0	0	Infinity	0
GRAMD1B	8469.XP_007067058.1	GRAM domain-containing protein 1B	0	0	0	0	0	0	0	Infinity	0
EXOC5	8469.XP_007067864.1	Exocyst complex component 5	7.52391	0.00172779	0.13291	0.5	4	14	3.75	0.869522	7988
PLIN1	8469.XP_007066917.1	Perilipin-1; Derived by automated computational analysis using gene prediction method: Gnomon. Supporting evidence includes similarity to: 7 Proteins	1	1	1	0	2	1	1	1	2
GARS	8469.XP_007066625.1	Glycyl-tRNA synthetase; glycine--tRNA ligase	6.05509	0.000441906	0.16515	0.5	5	14	5.8	0.898898	7754
EXOC6	8469.XP_007053069.1	Exocyst complex component 6 isoform X1	7.68503	0	0.130123	1	3	15	4	0.866299	0
PLIN2	8469.XP_007061746.1	Perilipin-2; Belongs to the perilipin family.	1.5	0	0.666667	0	1	2	2	0.75	0
ANGPTL2	8469.XP_007060994.1	Angiopoietin-related protein 2 isoform X1	0	0	0	0	0	0	0	Infinity	0
MTF2	8469.XP_007058947.1	Metal response element binding transcription factor 2; Derived by automated computational analysis using gene prediction method: Gnomon. Supporting evidence includes similarity to: 4 mRNAs	1.66667	0	0.6	0	1	2	3	0.777778	0
GJD3	8469.XP_007062036.1	Gap junction delta-3 protein; One gap junction consists of a cluster of closely packed pairs of transmembrane channels	7.86175	0	0.127198	0	1	14	8	0.862765	0
COL2A1	8469.XP_007058600.1	Collagen alpha-1(II) chain; The sequence of the model RefSeq protein was modified relative to its source genomic sequence to represent the inferred complete CDS: substituted 1 base at 1 genomic stop codon	2.71429	0	0.368421	0	1	4	3	0.428571	0
GNL3	8469.XP_007055664.1	Guanine nucleotide-binding protein-like 3	4.5894	0.00173185	0.217894	0.780303	33	11	33.2727	0.928212	64916
COPZ1	8469.XP_007065884.1	Coatomer subunit zeta-1	6.30457	0.00622835	0.158615	0.166667	4	14	3	0.893909	29596
GNL1	8469.XP_007068286.1	Guanine nucleotide-binding protein-like 1	4.81081	3.66385e-06	0.207865	0.993464	18	11	37.6667	0.923784	146
UY3_18289	8469.XP_007071613.1	Cdc42 effector protein 4-like	0	0	0	0	0	0	0	Infinity	0
ASH1L	8469.XP_007068147.1	Histone-lysine N-methyltransferase ASH1L	6.08212	0	0.164416	1	2	13	6	0.898358	0
ELMOD3	8469.XP_007067524.1	ELMO domain-containing protein 3	0	0	0	0	0	0	0	Infinity	0
EXOC7	8469.XP_007072602.1	Exocyst complex component 7	6.76611	0.0119133	0.147795	0.3	5	14	3.8	0.884678	88238
XP_007057988.1	8469.XP_007057988.1	Lipoprotein lipase-like	10.3015	0.002079	0.0970737	0	2	18	2	0.813971	13532
ZNF362	8469.XP_007071413.1	Zinc finger protein 362	8.75572	0	0.114211	0	1	15	4	0.844886	0
SHPRH	8469.XP_007056326.1	E3 ubiquitin-protein ligase SHPRH	5.1289	0.00156058	0.194974	0	2	12	13	0.917422	12222
UY3_19134	8469.XP_007072544.1	Dehydrogenase/reductase SDR family member 7C-like; Belongs to the short-chain dehydrogenases/reductases (SDR) family.	0	0	0	0	0	0	0	Infinity	0
CEP68	8469.XP_007062949.1	Centrosomal protein of 68 kDa	1	0	1	0	1	1	1	1	0
TEAD3	8469.XP_007063552.1	Transcriptional enhancer factor TEF-5; Transcription factor which plays a key role in the Hippo signaling pathway	1.5	0	0.666667	0	1	2	2	0.75	0
RRP15	8469.XP_007064830.1	RRP15-like protein	4.80353	0.000768232	0.20818	0.8	26	11	33.2308	0.923929	14976
JARID2	8469.XP_007054941.1	Protein Jumonji isoform X1	5.95426	7.78466e-05	0.167947	0.333333	3	12	5.66667	0.900915	666
RRP12	8469.XP_007068238.1	RRP12-like protein; The sequence of the model RefSeq protein was modified relative to its source genomic sequence to represent the inferred complete CDS: substituted 1 base at 1 genomic stop codon	4.59148	0.00794183	0.217795	0.638691	38	11	29.6316	0.92817	60406
ADAMTSL2	8469.XP_007061078.1	ADAMTS-like protein 2	0	0	0	0	0	0	0	Infinity	0
TCTN1	8469.XP_007058437.1	Tectonic-1	6.01247	0.0072465	0.166321	0.6	5	12	7.2	0.899751	72866
TCTN2	8469.XP_007058327.1	Tectonic-2	6.98545	2.16337e-06	0.143155	0.833333	4	13	6.25	0.880291	8
TCTN3	8469.XP_007059155.1	Tectonic-3	7.35967	0	0.135876	0	1	14	7	0.872807	0
UBL5	8469.XP_007065134.1	Ubiquitin-like protein 5	0	0	0	0	0	0	0	Infinity	0
ZNF280D	8469.XP_007056439.1	Zinc finger protein 280D	0	0	0	0	0	0	0	Infinity	0
VSIG10	8469.XP_007072039.1	V-set and immunoglobulin domain-containing protein 10	0	0	0	0	0	0	0	Infinity	0
ABCC10	8469.XP_007071789.1	Multidrug resistance-associated protein 7	0	0	0	0	0	0	0	Infinity	0
PHF20	8469.XP_007053997.1	PHD finger protein 20	1	0	1	1	2	1	2	1	0
GMEB2	8469.XP_007062571.1	Glucocorticoid modulatory element-binding protein 2	0	0	0	0	0	0	0	Infinity	0
BTG1	8469.XP_007059273.1	Protein BTG1	0	0	0	0	0	0	0	Infinity	0
SETD2	8469.XP_007066514.1	Histone-lysine N-methyltransferase SETD2	5.24324	0.0136107	0.190722	0.107143	8	12	5.625	0.915135	95612
PYGB	8469.XP_007059007.1	Alpha-1	6.92516	0.00484055	0.144401	0.333333	3	14	4	0.881497	24018
PHF2	8469.XP_007056949.1	Lysine-specific demethylase PHF2	0	0	0	0	0	0	0	Infinity	0
CEP57	8469.XP_007059474.1	Centrosomal protein of 57 kDa	0	0	0	0	0	0	0	Infinity	0
WDR49	8469.XP_007055570.1	WD repeat-containing protein 49	5.34096	5.70289e-06	0.187232	0.733333	10	13	18.3	0.913181	28
SETD4	8469.XP_007054682.1	SET domain-containing protein 4; Derived by automated computational analysis using gene prediction method: Gnomon. Supporting evidence includes similarity to: 11 Proteins	10.8857	0	0.091864	0	1	17	4	0.802287	0
RSPH10B	8469.XP_007060714.1	Radial spoke head 10 homolog B2	0	0	0	0	0	0	0	Infinity	0
CEP89	8469.XP_007058711.1	Centrosomal protein of 89 kDa	1	0	1	1	2	1	2	1	0
CCDC41	8469.XP_007069309.1	Coiled-coil domain-containing protein 41; Centrosomal protein of 83 kDa	1	0	1	1	2	1	2	1	0
UY3_14084	8469.XP_007067253.1	Visinin-like	1	0	1	0	1	1	1	1	0
ATG2A	8469.XP_007070467.1	Autophagy-related protein 2 homolog A	5.75468	0.000658726	0.173772	0	2	12	2.5	0.904906	4772
XP_007067341.1	8469.XP_007067341.1	Zinc finger and SCAN domain-containing protein 23-like	0	0	0	0	0	0	0	Infinity	0
WDR60	8469.XP_007054178.1	WD repeat-containing protein 60	9.89293	0.00720079	0.101082	0	2	16	4	0.822141	120024
HNRNPK	8469.XP_007065590.1	Heterogeneous nuclear ribonucleoprotein K; The sequence of the model RefSeq protein was modified relative to its source genomic sequence to represent the inferred complete CDS: substituted 1 base at 1 genomic stop codon	5.63617	0.0031657	0.177425	0.397059	17	14	9.05882	0.907277	41210
HNRNPM	8469.XP_007059444.1	Heterogeneous nuclear ribonucleoprotein M	5.58628	0.00474029	0.17901	0.441667	16	14	9.5	0.908274	46224
EHD2	8469.XP_007067381.1	EH domain-containing protein 2; Belongs to the TRAFAC class dynamin-like GTPase superfamily. Dynamin/Fzo/YdjA family.	5.40021	0.0155062	0.185178	0	3	13	5	0.911996	102724
HNRNPL	8469.XP_007068325.1	Heterogeneous nuclear ribonucleoprotein L isoform X1	5.46466	0.00620669	0.182994	0.389706	17	14	8.88235	0.910707	51102
XKR8	8469.XP_007066165.1	XK-related protein; The sequence of the model RefSeq protein was modified relative to its source genomic sequence to represent the inferred complete CDS: inserted 1 base in 1 codon	1	0	1	0	1	1	1	1	0
PAFAH2	8469.XP_007070909.1	Platelet-activating factor acetylhydrolase 2	3.73684	0.19883	0.267606	0	2	6	2.5	0.315789	68
ELL2	8469.XP_007054143.1	RNA polymerase II elongation factor ELL2	1	0	1	0	1	1	1	1	0
UY3_13461	8469.XP_007066608.1	Villin-1-like	0	0	0	0	0	0	0	Infinity	0
MEX3D	8469.XP_007068616.1	RNA-binding protein MEX3D	0	0	0	0	0	0	0	Infinity	0
NR1D1	8469.XP_007072843.1	Nuclear receptor subfamily 1 group D member 1; The sequence of the model RefSeq protein was modified relative to its source genomic sequence to represent the inferred complete CDS: deleted 2 bases in 1 codon	7.33888	0.002079	0.136261	0.333333	3	14	2.66667	0.873222	20262
RMDN2	8469.XP_007058037.1	Regulator of microtubule dynamics protein 2	0	0	0	0	0	0	0	Infinity	0
MCAM	8469.XP_007067049.1	Cell surface glycoprotein MUC18	7.28794	0	0.137213	0	1	14	3	0.874241	0
SNAPIN	8469.XP_007067905.1	SNARE-associated protein Snapin	0	0	0	0	0	0	0	Infinity	0
BARD1	8469.XP_007068372.1	BRCA1-associated RING domain protein 1-like	4.86486	0.000646345	0.205556	0.7	5	12	19.4	0.922703	12488
CEP78	8469.XP_007065668.1	Centrosomal protein 78; The sequence of the model RefSeq protein was modified relative to its source genomic sequence to represent the inferred complete CDS: deleted 2 bases in 1 codon	1.66667	0	0.6	0	1	2	3	0.777778	0
VPS16	8469.XP_007064739.1	Isocitrate dehydrogenase [NAD] subunit	6.64033	0.00687768	0.150595	0.333333	6	13	4.16667	0.887193	49096
CEP72	8469.XP_007058978.1	Centrosomal protein of 72 kDa	0	0	0	0	0	0	0	Infinity	0
ST3GAL5	8469.XP_007063767.1	Lactosylceramide alpha-2	9.84615	0.000131116	0.101562	0.666667	4	17	4.75	0.823077	3762
GAR1	8469.XP_007054544.1	H/ACA ribonucleoprotein complex subunit 1	5.01559	0.0164987	0.199378	0.454545	12	12	29.0833	0.919688	508096
VPS11	8469.XP_007062473.1	VPS11	7.53846	0	0.132653	1	3	14	6.33333	0.869231	0
ST3GAL4	8469.XP_007066426.1	CMP-N-acetylneuraminate-beta-galactosamide- alpha-2	0	0	0	0	0	0	0	Infinity	0
CEP70	8469.XP_007057127.1	Centrosomal protein of 70 kDa	0	0	0	0	0	0	0	Infinity	0
PRDM16	8469.XP_007070224.1	PR domain zinc finger protein 16	0	0	0	0	0	0	0	Infinity	0
BLOC1S3	8469.XP_007070030.1	Biogenesis of lysosome-related organelles complex 1 subunit 3	8.06965	0	0.123921	0	1	16	4	0.858607	0
FAM171A1	8469.XP_007058561.1	Uncharacterized protein; Derived by automated computational analysis using gene prediction method: Gnomon. Supporting evidence includes similarity to: 6 ESTs	2	0	0.5	0	1	3	2	0.5	0
WDR66	8469.XP_007058361.1	WD repeat-containing protein 66	7.98545	0.00415584	0.125228	0	3	14	1.33333	0.860291	19974
ADH5	8469.XP_007063078.1	Alcohol dehydrogenase class-3; The sequence of the model RefSeq protein was modified relative to its source genomic sequence to represent the inferred complete CDS: substituted 1 base at 1 genomic stop codon	7.32225	0.00825976	0.13657	0.466667	6	15	4.83333	0.873555	54072
PRDM11	8469.XP_007060787.1	Zinc finger protein 862	0	0	0	0	0	0	0	Infinity	0
XP_007069316.1	8469.XP_007069316.1	Transforming growth factor beta receptor type 3-like	0	0	0	0	0	0	0	Infinity	0
WDR63	8469.XP_007068799.1	WD repeat-containing protein 63; Derived by automated computational analysis using gene prediction method: Gnomon. Supporting evidence includes similarity to: 5 Proteins	7.97089	0	0.125456	1	2	14	3.5	0.860582	0
PRKDC	8469.XP_007058864.1	DNA-dependent protein kinase catalytic subunit	4.65281	0.00910855	0.214924	0.266667	6	10	16	0.926944	57596
PDXDC1	8469.XP_007058203.1	Pyridoxal-dependent decarboxylase domain-containing protein 1	0	0	0	0	0	0	0	Infinity	0
XP_007054851.1	8469.XP_007054851.1	Uncharacterized protein C17orf105 homolog	0	0	0	0	0	0	0	Infinity	0
UY3_01326	8469.XP_007053881.1	Transmembrane protein 98-like	0	0	0	0	0	0	0	Infinity	0
PRKD1	8469.XP_007069411.1	Serine/threonine-protein kinase D1 isoform X1	0	0	0	0	0	0	0	Infinity	0
NUP98	8469.XP_007067705.1	Nuclear pore complex protein Nup98-Nup96; Derived by automated computational analysis using gene prediction method: Gnomon. Supporting evidence includes similarity to: 3 mRNAs	5.62578	0.00178213	0.177753	0.571429	8	12	8.75	0.907484	20948
ARMC3	8469.XP_007058536.1	Armadillo repeat-containing protein 3; Derived by automated computational analysis using gene prediction method: Gnomon. Supporting evidence includes similarity to: 2 Proteins	0	0	0	0	0	0	0	Infinity	0
WDR77	8469.XP_007059674.1	WD repeat domain 77; Methylosome protein 50	7.52911	0	0.132818	0	1	15	3	0.869418	0
WDR76	8469.XP_007059580.1	Bloom syndrome protein like protein; WD repeat-containing protein 76	1.5	0	0.666667	0	1	2	2	0.75	0
WDR78	8469.XP_007063485.1	WD repeat-containing protein 78	7.97089	0	0.125456	1	2	14	3.5	0.860582	0
SCRIB	8469.XP_007061486.1	Protein scribble homolog	7.30353	0	0.13692	0	1	15	4	0.873929	0
DDX10	8469.XP_007059760.1	RNA helicase; Probable ATP-dependent RNA helicase DDX10	4.44179	0.0261146	0.225135	0.651652	37	11	30.1081	0.931164	298718
WDR75	8469.XP_007069959.1	WD repeat-containing protein 75; The sequence of the model RefSeq protein was modified relative to its source genomic sequence to represent the inferred complete CDS: inserted 2 bases in 1 codon	4.32848	0.0239233	0.231028	0.653968	36	11	31.2778	0.93343	240042
GTPBP6	8469.XP_007063288.1	Putative GTP-binding protein 6	0	0	0	0	0	0	0	Infinity	0
DNAAF2	8469.XP_007064859.1	DNA polymerase epsilon subunit 2; Protein kintoun	5.99792	0.050331	0.166724	0.0833333	9	12	4	0.900042	395740
MBNL2	8469.XP_007066284.1	Muscleblind-like protein 2 isoform X1	7.08004	0	0.141242	0	1	14	2	0.878399	0
DDX17	8469.XP_007069155.1	Putative ATP-dependent RNA helicase DDX17; The sequence of the model RefSeq protein was modified relative to its source genomic sequence to represent the inferred complete CDS: inserted 4 bases in 3 codons; deleted 2 bases in 1 codon	4.72661	0	0.211568	1	15	11	39.2667	0.925468	0
PRKCG	8469.XP_007070690.1	Protein kinase C gamma type	5.7422	0.00351717	0.174149	0	3	13	3.33333	0.905156	33758
NUP214	8469.XP_007061110.1	Nuclear pore complex protein Nup214 isoform X1	5.2131	0.0101529	0.191825	0.388889	9	11	8.11111	0.915738	59824
GJA9	8469.XP_007069083.1	Gap junction alpha-9 protein	0	0	0	0	0	0	0	Infinity	0
LUC7L	8469.XP_007066591.1	LUC7-like (S. cerevisiae); Putative RNA-binding protein Luc7-like 1-like	5.35135	0.00150645	0.186869	0.5	5	13	16.8	0.912973	10494
WDR90	8469.XP_007055906.1	WD repeat-containing protein 90	7.658	0.00978634	0.130582	0.214286	8	14	3.375	0.86684	144290
UY3_16715	8469.XP_007069997.1	Tripartite motif-containing protein 15-like	0	0	0	0	0	0	0	Infinity	0
WDR92	8469.XP_007062945.1	WD repeat-containing protein 92	6.48129	0.002079	0.15429	0	2	13	1.5	0.890374	11106
EPS8	8469.XP_007060626.1	Epidermal growth factor receptor kinase substrate 8 isoform X1	7.85551	0	0.127299	1	2	15	3.5	0.86289	0
ELK3	8469.XP_007069284.1	ELK3	0	0	0	0	0	0	0	Infinity	0
SMC4	8469.XP_007063146.1	Structural maintenance of chromosomes protein; Derived by automated computational analysis using gene prediction method: Gnomon. Supporting evidence includes similarity to: 8 ESTs	4.64657	0.00495087	0.215213	0.434783	24	12	20.875	0.927069	60298
SLC4A4	8469.XP_007065967.1	Anion exchange protein; Electrogenic sodium bicarbonate cotransporter 1	6.58628	0.00141393	0.151831	0.333333	3	13	3.66667	0.888274	9556
WDR89	8469.XP_007068066.1	WD repeat-containing protein 89	0	0	0	0	0	0	0	Infinity	0
SLC4A3	8469.XP_007066529.1	Anion exchange protein 3	0	0	0	0	0	0	0	Infinity	0
ADARB1	8469.XP_007069217.1	Adenosine deaminase	0	0	0	0	0	0	0	Infinity	0
SMC6	8469.XP_007052924.1	Structural maintenance of chromosomes protein 6	5.02287	0.000878468	0.199089	0.417582	14	12	19.5	0.919543	14056
HNRNPR	8469.XP_007066145.1	Heterogeneous nuclear ribonucleoprotein R; The sequence of the model RefSeq protein was modified relative to its source genomic sequence to represent the inferred complete CDS: inserted 2 bases in 1 codon	5.14137	0.0159994	0.194501	0.516484	14	13	12.3571	0.917173	115636
HNRNPU	8469.XP_007058016.1	Heterogeneous nuclear ribonucleoprotein U	5.88254	0.000107328	0.169995	0.904762	7	14	13.4286	0.902349	2430
WDR86	8469.XP_007059490.1	WD repeat-containing protein 86	0	0	0	0	0	0	0	Infinity	0
KIAA0141	8469.XP_007056361.1	Death ligand signal enhancer	0	0	0	0	0	0	0	Infinity	0
FRMPD4	8469.XP_007060261.1	FERM and PDZ domain-containing protein 4	0	0	0	0	0	0	0	Infinity	0
TES	8469.XP_007070592.1	Testin LIM domain protein; Testin	0	0	0	0	0	0	0	Infinity	0
XP_007053968.1	8469.XP_007053968.1	The sequence of the model RefSeq protein was modified relative to its source genomic sequence to represent the inferred complete CDS: substituted 1 base at 1 genomic stop codon	0	0	0	0	0	0	0	Infinity	0
ERCC8	8469.XP_007055406.1	ERCC excision repair 8	0	0	0	0	0	0	0	Infinity	0
ERCC2	8469.XP_007068966.1	ERCC excision repair 2	4.57588	0.0147793	0.218537	0.75	8	12	15.25	0.928482	167050
UY3_18622	8469.XP_007072030.1	Cationic amino acid transporter 4-like	1	0	1	0	1	1	1	1	0
GPR144	8469.XP_007061152.1	Probable G-protein coupled receptor 144	0	0	0	0	0	0	0	Infinity	0
COL7A1	8469.XP_007060080.1	Collagen	0	0	0	0	0	0	0	Infinity	0
SIMC1	8469.XP_007065080.1	SUMO-interacting motif-containing protein 1	1	0	1	0	1	1	1	1	0
POLE2	8469.XP_007064858.1	DNA polymerase epsilon subunit 2	4.79834	0.000607451	0.208406	0.529412	17	12	23.6471	0.924033	7314
ERCC4	8469.XP_007058198.1	DNA repair endonuclease XPF	4.67775	0.013597	0.213778	0.346405	18	10	15.7222	0.926445	179676
MYO15A	8469.XP_007062826.1	Myosin-XV; Unconventional myosin-XV; Belongs to the TRAFAC class myosin-kinesin ATPase superfamily. Myosin family.	7.73805	0	0.129232	1	2	15	4	0.865239	0
ERCC3	8469.XP_007069503.1	TFIIH basal transcription factor complex helicase XPB subunit	4.89605	0.00441608	0.204246	0.6	10	11	10.6	0.922079	43474
TEAD4	8469.XP_007055692.1	TEA domain transcription factor 4; Transcriptional enhancer factor TEF-3 isoform X1	1.5	0	0.666667	0	1	2	2	0.75	0
RSPH1	8469.XP_007064542.1	Radial spoke head 1 homolog	7.98545	0	0.125228	0	1	14	5	0.860291	0
XP_007055728.1	8469.XP_007055728.1	Alpha-2-macroglobulin-like protein 1-like	0	0	0	0	0	0	0	Infinity	0
GALNS	8469.XP_007059362.1	N-acetylgalactosamine-6-sulfatase	10.1424	0	0.0985959	0	1	17	8	0.817152	0
UY3_07218	8469.XP_007060019.1	Netrin-4-like	0	0	0	0	0	0	0	Infinity	0
TTC16	8469.XP_007057392.1	Tetratricopeptide repeat protein 16	0	0	0	0	0	0	0	Infinity	0
TBX18	8469.XP_007052627.1	T-box transcription factor TBX18	8.32848	0	0.12007	0	1	16	4	0.85343	0
CDC42SE2	8469.XP_007056858.1	CDC42 small effector protein 2	0	0	0	0	0	0	0	Infinity	0
TTC12	8469.XP_007060535.1	Tetratricopeptide repeat domain 12; Derived by automated computational analysis using gene prediction method: Gnomon. Supporting evidence includes similarity to: 4 mRNAs	5.2183	3.56957e-05	0.191633	0.666667	4	13	9.75	0.915634	120
TTC14	8469.XP_007059139.1	Tetratricopeptide repeat protein 14	5.52911	0.00717405	0.180861	0.5	4	13	12.25	0.909418	42904
DNAI1	8469.XP_007066600.1	Dynein intermediate chain 1	6.96258	0.0287829	0.143625	0.166667	4	13	5	0.880748	333752
MTA2	8469.XP_007056960.1	Metastasis-associated protein MTA2	5.99168	0	0.166898	1	2	13	7.5	0.900166	0
GNG8	8469.XP_007069115.1	Guanine nucleotide-binding protein subunit gamma; Guanine nucleotide-binding proteins (G proteins) are involved as a modulator or transducer in various transmembrane signaling systems. The beta and gamma chains are required for the GTPase activity	0	0	0	0	0	0	0	Infinity	0
BNIP2	8469.XP_007053830.1	BCL2/adenovirus E1B 19 kDa protein-interacting protein 2	0	0	0	0	0	0	0	Infinity	0
MAN1C1	8469.XP_007070913.1	Mannosyl-oligosaccharide 1	0	0	0	0	0	0	0	Infinity	0
TMEM206	8469.XP_007058067.1	Transmembrane protein 206 isoform X1	0	0	0	0	0	0	0	Infinity	0
MKNK2	8469.XP_007068628.1	MAP kinase-interacting serine/threonine-protein kinase 2; The sequence of the model RefSeq protein was modified relative to its source genomic sequence to represent the inferred complete CDS: substituted 1 base at 1 genomic stop codon	5.44387	0	0.183693	1	2	12	7	0.911123	0
TGS1	8469.XP_007054559.1	Trimethylguanosine synthase	5.94595	0	0.168182	0	1	14	18	0.901081	0
MKNK1	8469.XP_007061652.1	MAP kinase-interacting serine/threonine-protein kinase 1	5.44387	0	0.183693	1	2	12	7	0.911123	0
UY3_16095	8469.XP_007069382.1	Major histocompatibility complex class I-related gene protein; DLA class II histocompatibility antigen	0	0	0	0	0	0	0	Infinity	0
GNG4	8469.XP_007068926.1	G protein subunit gamma 4; Guanine nucleotide-binding protein G(I)/G(S)/G(O) subunit gamma-4	0	0	0	0	0	0	0	Infinity	0
SV2A	8469.XP_007064633.1	Synaptic vesicle glycoprotein 2A	0	0	0	0	0	0	0	Infinity	0
UY3_04941	8469.XP_007057642.1	Beta/gamma crystallin domain-containing protein 3; Uncharacterized protein LOC102935297; Belongs to the beta/gamma-crystallin family.	0	0	0	0	0	0	0	Infinity	0
GNG2	8469.XP_007069368.1	G protein subunit gamma 2; Guanine nucleotide-binding protein G(I)/G(S)/G(O) subunit gamma-2	9.17879	0.002079	0.108947	0	2	17	2	0.836424	88268
POLD4	8469.XP_007069532.1	DNA polymerase delta subunit 4	0	0	0	0	0	0	0	Infinity	0
GK5	8469.XP_007055056.1	Putative glycerol kinase 5	0	0	0	0	0	0	0	Infinity	0
ASB16	8469.XP_007061961.1	Ankyrin repeat and SOCS box protein 16; The sequence of the model RefSeq protein was modified relative to its source genomic sequence to represent the inferred complete CDS: deleted 2 bases in 2 codons	0	0	0	0	0	0	0	Infinity	0
ADD1	8469.XP_007060088.1	Alpha-adducin isoform X1	0	0	0	0	0	0	0	Infinity	0
PPOX	8469.XP_007070019.1	Protoporphyrinogen oxidase; Catalyzes the 6-electron oxidation of protoporphyrinogen-IX to form protoporphyrin-IX.	2.25	0	0.444444	0	1	3	2	0.583333	0
NT5C2	8469.XP_007057917.1	Cytosolic purine 5'-nucleotidase	6	0.00222596	0.166667	0.166667	4	13	8	0.9	16632
ASAP2	8469.XP_007053255.1	arf-GAP with SH3 domain	7.76091	0.00415368	0.128851	0	2	15	3.5	0.864782	28328
DNAH9	8469.XP_007072634.1	Dynein heavy chain 9	0	0	0	0	0	0	0	Infinity	0
RSPH9	8469.XP_007071718.1	Radial spoke head protein 9 like protein; Derived by automated computational analysis using gene prediction method: Gnomon. Supporting evidence includes similarity to: 1 mRNA	6.98649	0.00230397	0.143133	0.1	5	13	4.4	0.88027	18022
PKD1L1	8469.XP_007072821.1	Polycystin 1 like 1	0	0	0	0	0	0	0	Infinity	0
ASB14	8469.XP_007060827.1	Ankyrin repeat and SOCS box protein 14	0	0	0	0	0	0	0	Infinity	0
RNF8	8469.XP_007071736.1	E3 ubiquitin-protein ligase RNF8	5.31289	0	0.188221	1	3	12	15	0.913742	0
RAP1GDS1	8469.XP_007063073.1	Rap1 GTPase-GDP dissociation stimulator 1; Derived by automated computational analysis using gene prediction method: Gnomon. Supporting evidence includes similarity to: 18 ESTs	0	0	0	0	0	0	0	Infinity	0
SFSWAP	8469.XP_007055033.1	Splicing factor	5.44075	0.000277068	0.183798	0	2	13	13	0.911185	1782
RRN3	8469.XP_007058202.1	RNA polymerase I-specific transcription initiation factor RRN3; Derived by automated computational analysis using gene prediction method: Gnomon. Supporting evidence includes similarity to: 1 EST	4.96881	0.0038981	0.201255	0.166667	4	12	14.25	0.920624	21858
RALB	8469.XP_007061361.1	Ras-related protein Ral-B	6.94179	0	0.144055	0	1	13	2	0.881164	0
DNAH3	8469.XP_007064447.1	Dynein heavy chain 3	8.98441	0	0.111304	0	1	15	3	0.840312	0
PLEC	8469.XP_007066847.1	Plectin; The sequence of the model RefSeq protein was modified relative to its source genomic sequence to represent the inferred complete CDS: inserted 2 bases in 1 codon; substituted 1 base at 1 genomic stop codon	0	0	0	0	0	0	0	Infinity	0
ATP6V1B1	8469.XP_007064072.1	V-type proton ATPase subunit B	6.38565	0.0135693	0.156601	0.1	5	12	2.6	0.892287	71914
FBP1	8469.XP_007056094.1	Fructose-1	6.74324	0.002079	0.148297	0	2	14	4	0.885135	6936
ZMYND12	8469.XP_007068896.1	Zinc finger MYND domain-containing protein 12	0	0	0	0	0	0	0	Infinity	0
ZMYND11	8469.XP_007054191.1	Zinc finger MYND domain-containing protein 11	6.74428	0	0.148274	0	1	13	2	0.885114	0
UY3_16781	8469.XP_007070056.1	UPF0554 protein C2orf43 homolog	0	0	0	0	0	0	0	Infinity	0
UY3_17128	8469.XP_007070468.1	Kinase; Inositol-trisphosphate 3-kinase B-like; Belongs to the inositol phosphokinase (IPK) family.	0	0	0	0	0	0	0	Infinity	0
UY3_17611	8469.XP_007070939.1	Uncharacterized protein LOC102937003	0	0	0	0	0	0	0	Infinity	0
ELF5	8469.XP_007068028.1	E74 like ETS transcription factor 5; The sequence of the model RefSeq protein was modified relative to its source genomic sequence to represent the inferred complete CDS: substituted 1 base at 1 genomic stop codon	0	0	0	0	0	0	0	Infinity	0
TMEM216	8469.XP_007065837.1	Transmembrane protein 216	6.36071	0.00421613	0.157215	0.380952	7	13	4.71429	0.892786	45566
UY3_04834	8469.XP_007057488.1	Protein FAM26E-like	0	0	0	0	0	0	0	Infinity	0
TTI1	8469.XP_007071218.1	TELO2-interacting protein 1 homolog	5.18399	0.00914957	0.192902	0.333333	4	11	7.75	0.91632	35538
TAPBP	8469.XP_007069610.1	Tapasin	0	0	0	0	0	0	0	Infinity	0
EPN1	8469.XP_007067273.1	Epsin-1	8.33264	0	0.12001	0	1	16	4	0.853347	0
IRAK4	8469.XP_007064043.1	Interleukin-1 receptor-associated kinase 4	6.98753	0.00622835	0.143112	0	3	13	2.33333	0.880249	39202
OLIG2	8469.XP_007063647.1	Oligodendrocyte transcription factor 2	0	0	0	0	0	0	0	Infinity	0
UY3_10303	8469.XP_007063308.1	Ankyrin-1; Serine/threonine-protein phosphatase 6 regulatory ankyrin repeat subunit B-like	2	0	0.5	0	1	3	4	0.75	0
UY3_03008	8469.XP_007055635.1	Transporter; Sodium- and chloride-dependent GABA transporter 1-like isoform X1; Belongs to the sodium:neurotransmitter symporter (SNF) (TC 2.A.22) family.	0	0	0	0	0	0	0	Infinity	0
GGACT	8469.XP_007066297.1	Gamma-glutamylaminecyclotransferase	0	0	0	0	0	0	0	Infinity	0
MYO18A	8469.XP_007057828.1	Myosin-XVIIIa; Unconventional myosin-XVIIIa; Belongs to the TRAFAC class myosin-kinesin ATPase superfamily. Myosin family.	0	0	0	0	0	0	0	Infinity	0
MYO18B	8469.XP_007058456.1	Myosin-XVIIIb; The sequence of the model RefSeq protein was modified relative to its source genomic sequence to represent the inferred complete CDS: inserted 2 bases in 1 codon; Belongs to the TRAFAC class myosin-kinesin ATPase superfamily. Myosin family.	0	0	0	0	0	0	0	Infinity	0
GRM7	8469.XP_007061339.1	Metabotropic glutamate receptor 7 isoform X1	0	0	0	0	0	0	0	Infinity	0
GRM4	8469.XP_007063617.1	Metabotropic glutamate receptor 4	2	0	0.5	0	1	3	2	0.5	0
IFT52	8469.XP_007057234.1	Intraflagellar transport protein 52 homolog	11.8638	0.00207251	0.0842898	0.666667	4	18	4	0.782723	53372
UFL1	8469.XP_007052854.1	E3 UFM1-protein ligase 1	0	0	0	0	0	0	0	Infinity	0
TCHP	8469.XP_007058453.1	Trichoplein keratin filament-binding protein	0	0	0	0	0	0	0	Infinity	0
TMEM220	8469.XP_007072739.1	Transmembrane protein 220; The sequence of the model RefSeq protein was modified relative to its source genomic sequence to represent the inferred complete CDS: substituted 1 base at 1 genomic stop codon	0	0	0	0	0	0	0	Infinity	0
CABIN1	8469.XP_007063805.1	Calcineurin-binding protein cabin-1-like	0	0	0	0	0	0	0	Infinity	0
LMNB1	8469.XP_007060916.1	lamin-B1	4.88565	0.00420134	0.204681	0.166667	4	12	24.75	0.922287	28434
GRM1	8469.XP_007056325.1	Metabotropic glutamate receptor 1; The sequence of the model RefSeq protein was modified relative to its source genomic sequence to represent the inferred complete CDS: deleted 1 base in 1 codon; substituted 1 base at 1 genomic stop codon	8.69127	0	0.115058	0	1	16	5	0.846175	0
MYSM1	8469.XP_007059112.1	Myb like	5.48857	0.0133373	0.182197	0.0909091	11	11	4.54545	0.910229	63326
TNFAIP1	8469.XP_007057661.1	BTB/POZ domain-containing adapter for CUL3-mediated RhoA degradation protein 2; Derived by automated computational analysis using gene prediction method: Gnomon. Supporting evidence includes similarity to: 1 EST	0	0	0	0	0	0	0	Infinity	0
TTC24	8469.XP_007064652.1	Apolipoprotein A-I-binding protein; Catalyzes the epimerization of the S- and R-forms of NAD(P)HX	0	0	0	0	0	0	0	Infinity	0
SWSAP1	8469.XP_007058303.1	SWIM-type zinc finger 7 associated protein 1; ATPase SWSAP1	0	0	0	0	0	0	0	Infinity	0
TTC25	8469.XP_007054825.1	Tetratricopeptide repeat protein 25	9.3763	0.00829005	0.106652	0	2	17	3.5	0.832474	96368
GALK1	8469.XP_007072613.1	Galactokinase	0	0	0	0	0	0	0	Infinity	0
FBN1	8469.XP_007066925.1	Fibrillin-1	5.7027	0.0169074	0.175355	0.1	5	12	6.4	0.905946	145980
SDK2	8469.XP_007056139.1	Protein sidekick-2; The sequence of the model RefSeq protein was modified relative to its source genomic sequence to represent the inferred complete CDS: inserted 1 base in 1 codon; deleted 1 base in 1 codon	6.02807	0	0.165891	0	1	13	6	0.899439	0
DNAL4	8469.XP_007069149.1	Dynein light chain 4	7.93451	0.0266895	0.126032	0	2	14	3.5	0.86131	319968
UBA2	8469.XP_007058699.1	SUMO-activating enzyme subunit 2	4.66736	0.0245208	0.214254	0.25	8	12	9.125	0.926653	180176
NABP1	8469.XP_007069940.1	SOSS complex subunit B2	0	0	0	0	0	0	0	Infinity	0
MANSC4	8469.XP_007056990.1	MANSC domain-containing protein 4; Derived by automated computational analysis using gene prediction method: Gnomon. Supporting evidence includes similarity to: 1 mRNA	0	0	0	0	0	0	0	Infinity	0
XP_007054274.1	8469.XP_007054274.1	Exonuclease V-like	0	0	0	0	0	0	0	Infinity	0
XP_007054410.1	8469.XP_007054410.1	E3 ubiquitin-protein ligase TRIM39-like	0	0	0	0	0	0	0	Infinity	0
CNOT11	8469.XP_007069022.1	UPF0760 protein C2orf29; CCR4-NOT transcription complex subunit 11	6.22245	0.00208008	0.160708	0.333333	4	14	3.75	0.895551	33802
GNAL	8469.XP_007062396.1	Guanine nucleotide-binding protein G(olf) subunit alpha	8.18191	0.00622835	0.122221	0	3	16	4	0.856362	264796
RABL5	8469.XP_007054208.1	Rab-like protein 5	12.8597	0	0.0777625	1	3	19	4	0.762807	0
UBE2W	8469.XP_007063631.1	Ubiquitin-conjugating enzyme E2 W; Belongs to the ubiquitin-conjugating enzyme family.	0	0	0	0	0	0	0	Infinity	0
UY3_01648	8469.XP_007054194.1	Ovostatin-like	0	0	0	0	0	0	0	Infinity	0
TMEM231	8469.XP_007062486.1	Transmembrane protein 231	5.99896	0.000954523	0.166696	0.533333	6	12	6.66667	0.900021	21870
SYT6	8469.XP_007059661.1	Synaptotagmin-6	0	0	0	0	0	0	0	Infinity	0
IGF2R	8469.XP_007065756.1	Cation-independent mannose-6-phosphate receptor	6.33576	0.00549447	0.157834	0	2	14	2	0.893285	32036
TJAP1	8469.XP_007071711.1	Tight junction-associated protein 1	0	0	0	0	0	0	0	Infinity	0
SYT7	8469.XP_007065832.1	Synaptotagmin-7	0	0	0	0	0	0	0	Infinity	0
MANBAL	8469.XP_007057250.1	Protein MANBAL	0	0	0	0	0	0	0	Infinity	0
AP4B1	8469.XP_007059657.1	AP-4 complex subunit beta-1	7.30146	0.002079	0.136959	0	2	15	2.5	0.873971	9868
HOOK3	8469.XP_007063127.1	Protein Hook homolog 3 isoform X1	10.8836	0.002079	0.0918816	0	2	17	2.5	0.802328	13362
USB1	8469.XP_007063327.1	Matrix metalloproteinase-15; U6 snRNA phosphodiesterase; Belongs to the peptidase M10A family.	0	0	0	0	0	0	0	Infinity	0
NUP153	8469.XP_007054971.1	Nuclear pore complex protein Nup153	5.46362	0.0140468	0.183029	0.219048	15	12	6.2	0.910728	88002
RPP40	8469.XP_007058897.1	Ribonuclease P protein subunit p40	8.80977	0.002079	0.11351	0	2	17	1.5	0.843805	6958
PDHA1	8469.XP_007070579.1	Pyruvate dehydrogenase E1 component subunit alpha	6.73909	0.00232664	0.148388	0.166667	4	14	3.25	0.885218	11334
CRTAP	8469.XP_007057299.1	Cartilage-associated protein	1.25	0	0.8	1	3	2	3.33333	0.9375	0
CNTLN	8469.XP_007061760.1	Centlein	1.33333	0	0.75	1	2	2	2.5	0.888889	0
TBC1D16	8469.XP_007056103.1	TBC1 domain family member 16 isoform X1	0	0	0	0	0	0	0	Infinity	0
PIBF1	8469.XP_007072832.1	Progesterone-induced-blocking factor 1; The sequence of the model RefSeq protein was modified relative to its source genomic sequence to represent the inferred complete CDS: substituted 1 base at 1 genomic stop codon	0	0	0	0	0	0	0	Infinity	0
MORC2	8469.XP_007061433.1	MORC family CW-type zinc finger protein 2; The sequence of the model RefSeq protein was modified relative to its source genomic sequence to represent the inferred complete CDS: substituted 1 base at 1 genomic stop codon	0	0	0	0	0	0	0	Infinity	0
MORC1	8469.XP_007057630.1	MORC family CW-type zinc finger protein 1; The sequence of the model RefSeq protein was modified relative to its source genomic sequence to represent the inferred complete CDS: inserted 1 base in 1 codon	5.93867	0	0.168388	0	1	14	19	0.901227	0
RHPN2	8469.XP_007058709.1	Rhophilin-2	1	1	1	0	3	1	1	1	6
XP_007069615.1	8469.XP_007069615.1	E3 ubiquitin-protein ligase RING2-B-like	1	1	1	0	2	1	1	1	2
UY3_03133	8469.XP_007055779.1	Butyrophilin subfamily 1 member A1-like	0	0	0	0	0	0	0	Infinity	0
UY3_06993	8469.XP_007059905.1	Opsin-5-like; Belongs to the G-protein coupled receptor 1 family. Opsin subfamily.	0	0	0	0	0	0	0	Infinity	0
GRK6	8469.XP_007065045.1	G protein-coupled receptor kinase 6; Belongs to the protein kinase superfamily. AGC Ser/Thr protein kinase family. GPRK subfamily.	7.55405	0.00103842	0.132379	0	2	15	2.5	0.868919	19070
DHRS7B	8469.XP_007062798.1	Dehydrogenase/reductase SDR family member 7B	0	0	0	0	0	0	0	Infinity	0
IRAK2	8469.XP_007060066.1	Interleukin-1 receptor-associated kinase-like 2	7.98441	0.002079	0.125244	0	2	14	2	0.860312	13070
GRK4	8469.XP_007060094.1	G protein-coupled receptor kinase 4	7.55405	0.00103842	0.132379	0	2	15	2.5	0.868919	19070
SNTG1	8469.XP_007058860.1	Gamma-1-syntrophin	1	0	1	0	1	1	1	1	0
GPR64	8469.XP_007070580.1	Adhesion G protein-coupled receptor G2; G-protein coupled receptor 64	0	0	0	0	0	0	0	Infinity	0
AANAT	8469.XP_007072596.1	Serotonin N-acetyltransferase	6.62474	0	0.150949	0	1	13	3	0.887505	0
HIGD1C	8469.XP_007067082.1	HIG1 domain family member 1C	0	0	0	0	0	0	0	Infinity	0
TMEM245	8469.XP_007058986.1	Transmembrane protein 245	0	0	0	0	0	0	0	Infinity	0
ODF2L	8469.XP_007068804.1	Outer dense fiber of sperm tails 2 like; Derived by automated computational analysis using gene prediction method: Gnomon. Supporting evidence includes similarity to: 9 Proteins	1.5	0	0.666667	0	1	2	2	0.75	0
TMEM242	8469.XP_007063699.1	Transmembrane protein 242	4.76611	0.00823673	0.209815	0	2	12	36.5	0.924678	75298
CACNA1G	8469.XP_007062828.1	Voltage-dependent T-type calcium channel subunit alpha; Voltage-sensitive calcium channels (VSCC) mediate the entry of calcium ions into excitable cells and are also involved in a variety of calcium-dependent processes	1	0	1	0	1	1	1	1	0
TMEM241	8469.XP_007057069.1	Transmembrane protein 241	0	0	0	0	0	0	0	Infinity	0
NUP160	8469.XP_007068504.1	Nucleoporin 160; Nuclear pore complex protein Nup160	6.26923	4.32675e-07	0.159509	0.9	5	12	9.8	0.894615	2
CACNA1E	8469.XP_007061211.1	Voltage-dependent R-type calcium channel subunit alpha; Voltage-sensitive calcium channels (VSCC) mediate the entry of calcium ions into excitable cells and are also involved in a variety of calcium-dependent processes	1	0	1	0	1	1	1	1	0
HTRA2	8469.XP_007066244.1	Serine protease HTRA2	6.78482	0	0.147388	0	1	13	8	0.884304	0
SLC41A1	8469.XP_007072845.1	Solute carrier family 41 member 1; The sequence of the model RefSeq protein was modified relative to its source genomic sequence to represent the inferred complete CDS: substituted 1 base at 1 genomic stop codon	0	0	0	0	0	0	0	Infinity	0
HTRA1	8469.XP_007064289.1	Serine protease HTRA1	0	0	0	0	0	0	0	Infinity	0
CACNA1B	8469.XP_007067698.1	Voltage-dependent N-type calcium channel subunit alpha; Voltage-sensitive calcium channels (VSCC) mediate the entry of calcium ions into excitable cells and are also involved in a variety of calcium-dependent processes	1	0	1	0	1	1	1	1	0
UY3_17892	8469.XP_007071229.1	Peripheral-type benzodiazepine receptor-associated protein 1; Myeloperoxidase-like	0	0	0	0	0	0	0	Infinity	0
DDX5	8469.XP_007055160.1	Probable ATP-dependent RNA helicase DDX5 isoform X1; Belongs to the DEAD box helicase family.	4.72661	0	0.211568	1	15	11	39.2667	0.925468	0
TBC1D19	8469.XP_007058155.1	TBC1 domain family member 19	2	0	0.5	0	1	3	3	0.666667	0
UY3_01222	8469.XP_007053754.1	C-type natriuretic peptide 1; Derived by automated computational analysis using gene prediction method: Gnomon. Supporting evidence includes similarity to: 6 Proteins	0	0	0	0	0	0	0	Infinity	0
DDX6	8469.XP_007062450.1	Probable ATP-dependent RNA helicase DDX6	4.41268	0.0546393	0.22662	0.10989	14	12	11.9286	0.931746	436486
FBN2	8469.XP_007056862.1	Fibrillin-2	0	0	0	0	0	0	0	Infinity	0
PPIC	8469.XP_007060931.1	Peptidyl-prolyl cis-trans isomerase C	0	0	0	0	0	0	0	Infinity	0
WDFY4	8469.XP_007069631.1	WD repeat-and FYVE domain-containing protein 4; The sequence of the model RefSeq protein was modified relative to its source genomic sequence to represent the inferred complete CDS: inserted 2 bases in 2 codons	4.84719	0.0079964	0.206305	0	3	11	14	0.923056	56038
PPIB	8469.XP_007056529.1	Peptidyl-prolyl cis-trans isomerase B	1.25	0	0.8	1	3	2	3.33333	0.9375	0
TSNARE1	8469.XP_007069079.1	t-SNARE domain-containing protein 1	7.54054	0	0.132616	1	2	14	7	0.869189	0
TBC1D23	8469.XP_007061678.1	TBC1 domain family member 23 isoform X1	3.63158	0.105263	0.275362	0	2	7	2.5	0.342105	36
CCDC176	8469.XP_007065291.1	Basal body-orientation factor 1	0	0	0	0	0	0	0	Infinity	0
PPIH	8469.XP_007068890.1	Peptidyl-prolyl cis-trans isomerase H	4.88669	0.000125064	0.204637	0.857143	15	12	20.2	0.922266	3892
DNAJB11	8469.XP_007052710.1	DnaJ heat shock protein family (Hsp40) member B11; dnaJ homolog subfamily B member 11	1.88889	0	0.529412	1	3	3	4.66667	0.851852	0
ADAM12	8469.XP_007053108.1	Disintegrin and metalloproteinase domain-containing protein 12	0	0	0	0	0	0	0	Infinity	0
MAP7D1	8469.XP_007060806.1	MAP7 domain-containing protein 1	0	0	0	0	0	0	0	Infinity	0
[truncated: 503 more rows]

## Sheet: gonad
display name	name	stringdb::description	AverageShortestPathLength	BetweennessCentrality	ClosenessCentrality	ClusteringCoefficient	Degree	Eccentricity	NeighborhoodConnectivity	Radiality	Stress
ZPR1	8469.XP_007060550.1	Zinc finger protein ZPR1	0	0	0	0	0	0	0	Infinity	0
AQP11	8469.XP_007067464.1	Aquaporin-11	1.5	0	0.666667	0	1	2	2	0.75	0
XPNPEP2	8469.XP_007063879.1	xaa-Pro aminopeptidase 2	0	0	0	0	0	0	0	Infinity	0
NEURL3	8469.XP_007070098.1	E3 ubiquitin-protein ligase NEURL3	0	0	0	0	0	0	0	Infinity	0
XPNPEP1	8469.XP_007055617.1	xaa-Pro aminopeptidase 1; Belongs to the peptidase M24B family.	0	0	0	0	0	0	0	Infinity	0
FMNL2	8469.XP_007056745.1	Formin-like protein 2; Derived by automated computational analysis using gene prediction method: Gnomon. Supporting evidence includes similarity to: 2 ESTs	0	0	0	0	0	0	0	Infinity	0
UY3_15491	8469.XP_007068771.1	Uncharacterized protein LOC102938437	0	0	0	0	0	0	0	Infinity	0
XP_007054593.1	8469.XP_007054593.1	Inactive serine/threonine-protein kinase VRK3-like	0	0	0	0	0	0	0	Infinity	0
DLK2	8469.XP_007071710.1	Protein delta like protein 2; Derived by automated computational analysis using gene prediction method: Gnomon. Supporting evidence includes similarity to: 2 Proteins	0	0	0	0	0	0	0	Infinity	0
LGI3	8469.XP_007066383.1	Leucine-rich repeat LGI family member 3	0	0	0	0	0	0	0	Infinity	0
B3GAT3	8469.XP_007056936.1	Galactosylgalactosylxylosylprotein 3-beta-glucuronosyltransferase 3; Belongs to the glycosyltransferase 43 family.	1	0	1	0	1	1	1	1	0
PTCD2	8469.XP_007059297.1	Pentatricopeptide repeat-containing protein 2	7.96657	0.000656618	0.125525	0	2	16	2	0.918993	5482
PTCD1	8469.XP_007062793.1	Pentatricopeptide repeat-containing protein 1	7.07927	0.00232211	0.141257	0	2	15	3.5	0.929311	24878
REPS1	8469.XP_007058140.1	ralBP1-associated Eps domain-containing protein 1 isoform X1	6.32283	0	0.158157	1	3	14	3.66667	0.938107	0
S1PR3	8469.XP_007059303.1	Sphingosine 1-phosphate receptor 3; Belongs to the G-protein coupled receptor 1 family.	0	0	0	0	0	0	0	Infinity	0
XP_007059681.1	8469.XP_007059681.1	Protein FAM19A2-like	0	0	0	0	0	0	0	Infinity	0
FAM63B	8469.XP_007056449.1	Protein FAM63B	0	0	0	0	0	0	0	Infinity	0
REPS2	8469.XP_007070552.1	RalBP1-associated Eps domain-containing protein 2; Derived by automated computational analysis using gene prediction method: Gnomon. Supporting evidence includes similarity to: 2 Proteins	6.32283	0	0.158157	1	3	14	3.66667	0.938107	0
ERBB3	8469.XP_007064987.1	Erb-b2 receptor tyrosine kinase 3; The sequence of the model RefSeq protein was modified relative to its source genomic sequence to represent the inferred complete CDS: deleted 1 base in 1 codon	0	0	0	0	0	0	0	Infinity	0
PRRG3	8469.XP_007064034.1	Transmembrane gamma-carboxyglutamic acid protein 3	0	0	0	0	0	0	0	Infinity	0
LTC4S	8469.XP_007071548.1	Leukotriene C4 synthase	7.43457	0	0.134507	0	1	15	7	0.925179	0
WIZ	8469.XP_007069875.1	Protein Wiz; Derived by automated computational analysis using gene prediction method: Gnomon. Supporting evidence includes similarity to: 3 mRNAs	6.13276	0	0.163059	1	2	13	9.5	0.940317	0
CAMK2A	8469.XP_007071557.1	Calcium/calmodulin-dependent protein kinase type II subunit alpha isoform X1	0	0	0	0	0	0	0	Infinity	0
GMPR2	8469.XP_007065453.1	Guanosine 5'-monophosphate oxidoreductase; Catalyzes the irreversible NADPH-dependent deamination of GMP to IMP. It functions in the conversion of nucleobase	5.20726	0.00470385	0.19204	0.2	6	13	8.66667	0.951078	50486
USP11	8469.XP_007052947.1	Ubiquitin carboxyl-terminal hydrolase 11	0	0	0	0	0	0	0	Infinity	0
UY3_06137	8469.XP_007058902.1	MARVEL domain-containing protein 3-like	0	0	0	0	0	0	0	Infinity	0
USP10	8469.XP_007059385.1	Ubiquitin carboxyl-terminal hydrolase 10; Belongs to the peptidase C19 family.	0	0	0	0	0	0	0	Infinity	0
TUFT1	8469.XP_007068175.1	Tuftelin	0	0	0	0	0	0	0	Infinity	0
NXN	8469.XP_007057714.1	Nucleoredoxin	0	0	0	0	0	0	0	Infinity	0
HPGD	8469.XP_007067129.1	15-hydroxyprostaglandin dehydrogenase [NAD(+)]	0	0	0	0	0	0	0	Infinity	0
UY3_06835	8469.XP_007059643.1	UPF0739 protein C1orf74 homolog	0	0	0	0	0	0	0	Infinity	0
FAM60A	8469.XP_007067537.1	Protein FAM60A	2.57143	0.285714	0.388889	0	2	5	2	0.47619	12
MCTP2	8469.XP_007060429.1	Multiple C2 and transmembrane domain-containing protein 2	0	0	0	0	0	0	0	Infinity	0
ITGB1BP1	8469.XP_007053241.1	Integrin beta-1-binding protein 1 isoform X1	6.57211	0	0.152158	0	1	14	2	0.935208	0
LUC7L3	8469.XP_007062830.1	Luc7-like protein 3 isoform X1	5.63706	0.00234133	0.177397	0	4	13	7.5	0.946081	11032
RNF207	8469.XP_007070211.1	RING finger protein 207	0	0	0	0	0	0	0	Infinity	0
PALLD	8469.XP_007067109.1	Palladin	0	0	0	0	0	0	0	Infinity	0
LATS1	8469.XP_007057092.1	Serine/threonine-protein kinase LATS1	7.34193	0.0111557	0.136204	0	3	14	2.33333	0.926257	118554
CKAP4	8469.XP_007066211.1	Cytoskeleton-associated protein 4	2	0	0.5	0	1	3	2	0.5	0
ARAP1	8469.XP_007068902.1	Arf-GAP with Rho-GAP domain	0	0	0	0	0	0	0	Infinity	0
URB2	8469.XP_007071117.1	Unhealthy ribosome biogenesis protein 2 homolog	0	0	0	0	0	0	0	Infinity	0
IFLTD1	8469.XP_007063061.1	Intermediate filament tail domain-containing protein 1	0	0	0	0	0	0	0	Infinity	0
DESI2	8469.XP_007058053.1	PPPDE peptidase domain-containing protein 1; Desumoylating isopeptidase 2	0	0	0	0	0	0	0	Infinity	0
KLF13	8469.XP_007053827.1	Kruppel like factor 13; Derived by automated computational analysis using gene prediction method: Gnomon. Supporting evidence includes similarity to: 1 mRNA	1	0	1	0	1	1	1	1	0
ABCC2	8469.XP_007059153.1	Canalicular multispecific organic anion transporter 1	0	0	0	0	0	0	0	Infinity	0
KIAA0226	8469.XP_007057898.1	Run domain Beclin-1 interacting and cysteine-rich containing protein	1	0	1	0	1	1	1	1	0
ABCC4	8469.XP_007066311.1	Multidrug resistance-associated protein 4	0	0	0	0	0	0	0	Infinity	0
POLG	8469.XP_007060434.1	DNA polymerase gamma	7.1213	0	0.140424	0	1	15	5	0.928822	0
POLH	8469.XP_007071791.1	DNA polymerase eta	4.93983	2.62737e-05	0.202436	0.833333	4	12	38.25	0.954188	880
POLE	8469.XP_007071402.1	DNA polymerase epsilon catalytic subunit A	4.37345	0.0147758	0.228653	0.416667	40	12	30.7	0.960774	183430
UY3_00986	8469.XP_007053482.1	Spliceosome RNA helicase Ddx39b; Uncharacterized protein LOC102935352	4.46132	0.0458739	0.224149	0.111111	10	11	12	0.959752	313582
BDKRB2	8469.XP_007065026.1	B2 bradykinin receptor	0	0	0	0	0	0	0	Infinity	0
ZC3H7A	8469.XP_007058193.1	Zinc finger CCCH domain-containing protein 7A	0	0	0	0	0	0	0	Infinity	0
SENP7	8469.XP_007061673.1	Sentrin-specific protease 7	5.56734	0.00191022	0.179619	0	2	13	4	0.946891	7472
HEBP1	8469.XP_007064120.1	Heme-binding protein 1	0	0	0	0	0	0	0	Infinity	0
LMOD2	8469.XP_007063249.1	Leiomodin-2 isoform X1	1	0	1	0	1	1	1	1	0
CHTF18	8469.XP_007058645.1	Chromosome transmission fidelity protein 18 homolog	4.617	0.000537092	0.216591	0.632275	28	11	36.6071	0.957942	13502
GTDC1	8469.XP_007057540.1	Glycosyltransferase-like domain-containing protein 1	0	0	0	0	0	0	0	Infinity	0
USP34	8469.XP_007064189.1	Ubiquitin carboxyl-terminal hydrolase 34; The sequence of the model RefSeq protein was modified relative to its source genomic sequence to represent the inferred complete CDS: inserted 1 base in 1 codon; deleted 1 base in 1 codon	5.35721	0.0036584	0.186664	0	5	13	5.4	0.949335	26830
PDE3B	8469.XP_007057160.1	Phosphodiesterase 3B; Derived by automated computational analysis using gene prediction method: Gnomon. Supporting evidence includes similarity to: 3 mRNAs	5.74403	0	0.174094	0	1	13	13	0.944837	0
USP32	8469.XP_007057684.1	Ubiquitin carboxyl-terminal hydrolase 32; Belongs to the peptidase C19 family.	0	0	0	0	0	0	0	Infinity	0
USP31	8469.XP_007058681.1	Ubiquitin carboxyl-terminal hydrolase 31	0	0	0	0	0	0	0	Infinity	0
XP_007069527.1	8469.XP_007069527.1	cystatin-B-like	0	0	0	0	0	0	0	Infinity	0
ABCD3	8469.XP_007065237.1	ATP-binding cassette sub-family D member 3	5.23018	0.00381679	0.191198	0	2	12	20.5	0.950812	48284
DOCK4	8469.XP_007071029.1	Dedicator of cytokinesis protein 4; Belongs to the DOCK family.	4.84336	0.0142489	0.206468	0.636364	11	13	16.2727	0.95531	156180
USP37	8469.XP_007070753.1	Ubiquitin carboxyl-terminal hydrolase 37; Derived by automated computational analysis using gene prediction method: Gnomon. Supporting evidence includes similarity to: 1 mRNA	5.75645	0.00229866	0.173718	0.333333	3	13	8	0.944692	10766
DOCK5	8469.XP_007065566.1	Dedicator of cytokinesis protein 5; Belongs to the DOCK family.	6.08023	0	0.164467	0	1	14	7	0.940928	0
B4GALT2	8469.XP_007061597.1	Beta-1	8.6084	0.0049739	0.116166	0.166667	4	17	3	0.91153	111588
RADIL	8469.XP_007062816.1	Ras-associating and dilute domain-containing protein	0	0	0	0	0	0	0	Infinity	0
COL20A1	8469.XP_007059935.1	Collagen alpha-1(XX) chain	0	0	0	0	0	0	0	Infinity	0
TMEM119	8469.XP_007058446.1	Transmembrane protein 119	0	0	0	0	0	0	0	Infinity	0
UY3_03196	8469.XP_007055832.1	Acyl-coenzyme A thioesterase 1-like	0	0	0	0	0	0	0	Infinity	0
KIF18B	8469.XP_007053906.1	Kinesin-like protein KIF18B; Belongs to the TRAFAC class myosin-kinesin ATPase superfamily. Kinesin family.	4.66762	1.47917e-05	0.214242	0.856209	18	12	42.6667	0.957353	412
FER	8469.XP_007055487.1	Tyrosine-protein kinase Fer	7.23973	0	0.138127	0	1	14	3	0.927445	0
ARHGAP32	8469.XP_007066419.1	Rho GTPase-activating protein 32-like	5.09933	8.0194e-05	0.196104	0.571429	7	12	30.1429	0.952333	3258
TDRD3	8469.XP_007060637.1	Tudor domain-containing protein 3; Derived by automated computational analysis using gene prediction method: Gnomon. Supporting evidence includes similarity to: 5 Proteins	5.56065	0.002139	0.179835	0.3	5	13	7.4	0.946969	24514
ESR1	8469.XP_007060399.1	Estrogen receptor isoform X1	4.84336	0.0248029	0.206468	0.047619	7	12	10.8571	0.95531	206106
TDRD5	8469.XP_007061219.1	Tudor domain-containing protein 5	0	0	0	0	0	0	0	Infinity	0
SMAD6	8469.XP_007059597.1	Mothers against decapentaplegic homolog 6	9.27603	0.00372637	0.107805	0	2	16	2.5	0.903767	30598
UY3_12517	8469.XP_007065716.1	Phosphoinositide phospholipase C; Ubiquitin carboxyl-terminal hydrolase CYLD-like	1	0	1	0	1	1	1	1	0
ARHGAP28	8469.XP_007062382.1	Rho GTPase-activating protein 28	8.46896	0	0.118078	0	1	16	5	0.913152	0
TDRD9	8469.XP_007062992.1	Putative ATP-dependent RNA helicase TDRD9	0	0	0	0	0	0	0	Infinity	0
ASPSCR1	8469.XP_007063445.1	Tether containing UBX domain for GLUT4	5.98281	0.0132089	0.167146	0.166667	4	13	5.75	0.94206	66740
ALYREF	8469.XP_007063419.1	Aly/REF export factor; Derived by automated computational analysis using gene prediction method: Gnomon. Supporting evidence includes similarity to: 1 mRNA	4.69914	0.0375793	0.212805	0.186813	14	12	9	0.956987	237612
ACBD4	8469.XP_007053903.1	Acyl-CoA-binding domain-containing protein 4; The sequence of the model RefSeq protein was modified relative to its source genomic sequence to represent the inferred complete CDS: substituted 1 base at 1 genomic stop codon	1	0	1	0	1	1	1	1	0
STIL	8469.XP_007061658.1	SCL-interrupting locus protein	5.04202	0.00231137	0.198333	0.466667	6	12	25.5	0.953	33416
SMAD1	8469.XP_007070204.1	SMAD family member 1; Mothers against decapentaplegic homolog 1 isoform X1	10.1691	0.0020651	0.0983376	0	2	17	2	0.893383	13532
ZC3H14	8469.XP_007055992.1	Zinc finger CCCH-type containing 14; The sequence of the model RefSeq protein was modified relative to its source genomic sequence to represent the inferred complete CDS: substituted 1 base at 1 genomic stop codon	5.45368	0	0.183363	1	2	13	11.5	0.948213	0
MARK3	8469.XP_007062971.1	MAP/microtubule affinity-regulating kinase 3 isoform X1	0	0	0	0	0	0	0	Infinity	0
UY3_02125	8469.XP_007054650.1	Beta-Ala-His dipeptidase; The sequence of the model RefSeq protein was modified relative to its source genomic sequence to represent the inferred complete CDS: substituted 1 base at 1 genomic stop codon	6.23973	0.000276864	0.160263	0.666667	6	13	9.16667	0.939073	5172
COBLL1	8469.XP_007056779.1	Cordon-bleu protein-like 1	0	0	0	0	0	0	0	Infinity	0
PODXL	8469.XP_007056620.1	Podocalyxin	0	0	0	0	0	0	0	Infinity	0
MAN2A2	8469.XP_007059622.1	Alpha-mannosidase; The sequence of the model RefSeq protein was modified relative to its source genomic sequence to represent the inferred complete CDS: substituted 1 base at 1 genomic stop codon	0	0	0	0	0	0	0	Infinity	0
SCIN	8469.XP_007053275.1	Adseverin	0	0	0	0	0	0	0	Infinity	0
ARHGAP22	8469.XP_007069195.1	Rho GTPase-activating protein 22	0	0	0	0	0	0	0	Infinity	0
ZFP36L1	8469.XP_007054315.1	Zinc finger protein 36	0	0	0	0	0	0	0	Infinity	0
PLCXD2	8469.XP_007057633.1	PI-PLC X domain-containing protein 2	0	0	0	0	0	0	0	Infinity	0
DTX4	8469.XP_007068500.1	E3 ubiquitin-protein ligase DTX4-like	5.68577	0	0.175878	0	1	13	12	0.945514	0
CTTNBP2	8469.XP_007053175.1	Cortactin-binding protein 2; The sequence of the model RefSeq protein was modified relative to its source genomic sequence to represent the inferred complete CDS: inserted 2 bases in 1 codon	5.32092	0.00952188	0.187938	0.166667	4	12	5.75	0.949757	47614
USP53	8469.XP_007054512.1	Inactive ubiquitin carboxyl-terminal hydrolase 53; Derived by automated computational analysis using gene prediction method: Gnomon. Supporting evidence includes similarity to: 1 EST	0	0	0	0	0	0	0	Infinity	0
H6PD	8469.XP_007053785.1	GDH/6PGL endoplasmic bifunctional protein	4.7469	0.0746665	0.210664	0.0555556	9	13	10.1111	0.956431	1039660
ATP6V1A	8469.XP_007068193.1	V-type proton ATPase catalytic subunit A-like	1	0	1	1	2	1	2	1	0
RAI14	8469.XP_007064155.1	Ankycorbin	0	0	0	0	0	0	0	Infinity	0
COL4A5	8469.XP_007060207.1	Collagen alpha-5(IV) chain	0	0	0	0	0	0	0	Infinity	0
COL4A6	8469.XP_007060206.1	Collagen alpha-6(IV) chain; Belongs to the type IV collagen family.	0	0	0	0	0	0	0	Infinity	0
APLNR	8469.XP_007068257.1	Apelin receptor; Belongs to the G-protein coupled receptor 1 family.	0	0	0	0	0	0	0	Infinity	0
EOGT	8469.XP_007061534.1	EGF domain specific O-linked N-acetylglucosamine transferase; Derived by automated computational analysis using gene prediction method: Gnomon. Supporting evidence includes similarity to: 2 mRNAs	0	0	0	0	0	0	0	Infinity	0
COL4A3	8469.XP_007055096.1	Collagen alpha-3(IV) chain	0	0	0	0	0	0	0	Infinity	0
COL4A4	8469.XP_007055095.1	Collagen alpha-4(IV) chain; Belongs to the type IV collagen family.	0	0	0	0	0	0	0	Infinity	0
ILVBL	8469.XP_007069872.1	Acetolactate synthase-like protein isoform X1; Belongs to the TPP enzyme family.	0	0	0	0	0	0	0	Infinity	0
ALDH3A2	8469.XP_007057807.1	Fatty aldehyde dehydrogenase; Belongs to the aldehyde dehydrogenase family.	5.9255	0.0206941	0.168762	0.238095	15	13	6.86667	0.942727	190234
DCTD	8469.XP_007054532.1	Deoxycytidylate deaminase isoform X1	4.73543	0.00733177	0.211174	0.428571	8	12	17.5	0.956565	68216
SGOL1	8469.XP_007053296.1	Shugoshin-like 1	4.6361	5.94965e-05	0.215698	0.815385	26	12	42.9231	0.95772	1654
TMEM130	8469.XP_007065431.1	Transmembrane protein 130	0	0	0	0	0	0	0	Infinity	0
KCTD3	8469.XP_007064832.1	BTB/POZ domain-containing protein KCTD3	0	0	0	0	0	0	0	Infinity	0
WRNIP1	8469.XP_007058884.1	ATPase WRNIP1	5.66667	0	0.176471	0	1	13	20	0.945736	0
UY3_02530	8469.XP_007055119.1	Glutathione S-transferase-like	5.99522	0.000884702	0.166799	0.666667	6	13	6	0.941916	17418
XP_007071370.1	8469.XP_007071370.1	Uncharacterized protein LOC102947794	0	0	0	0	0	0	0	Infinity	0
XP_007060865.1	8469.XP_007060865.1	UDP-glucuronosyltransferase 1-1-like	7.5511	0.0208554	0.132431	0	3	14	3.66667	0.923824	179718
ABCG8	8469.XP_007052734.1	ATP-binding cassette sub-family G member 8; The sequence of the model RefSeq protein was modified relative to its source genomic sequence to represent the inferred complete CDS: substituted 1 base at 1 genomic stop codon	2	0	0.5	0	1	3	2	0.5	0
CA13	8469.XP_007052983.1	Carbonic anhydrase 13	0	0	0	0	0	0	0	Infinity	0
PDE8A	8469.XP_007066932.1	Phosphodiesterase; High affinity cAMP-specific and IBMX-insensitive 3'	5.74403	0	0.174094	0	1	13	13	0.944837	0
PDE8B	8469.XP_007066762.1	Phosphodiesterase; High affinity cAMP-specific and IBMX-insensitive 3'	5.74403	0	0.174094	0	1	13	13	0.944837	0
KNTC1	8469.XP_007058435.1	Kinetochore-associated protein 1	4.52913	0.00022309	0.220793	0.703704	27	12	46.6667	0.958964	8530
NUSAP1	8469.XP_007055839.1	Nucleolar and spindle-associated protein 1	4.30086	0.00639674	0.232512	0.503546	48	12	35.4375	0.961618	117448
ARHGAP40	8469.XP_007057238.1	Rho GTPase-activating protein 40	8.46896	0	0.118078	0	1	16	5	0.913152	0
EFTUD2	8469.XP_007053888.1	116 kDa U5 small nuclear ribonucleoprotein component isoform X1	4.75549	0.0366576	0.210283	0.196923	26	12	11.3846	0.956331	265804
SYDE2	8469.XP_007068836.1	Rho GTPase-activating protein SYDE2; The sequence of the model RefSeq protein was modified relative to its source genomic sequence to represent the inferred complete CDS: inserted 2 bases in 1 codon	0	0	0	0	0	0	0	Infinity	0
ESPN	8469.XP_007070275.1	Espin; The sequence of the model RefSeq protein was modified relative to its source genomic sequence to represent the inferred complete CDS: substituted 1 base at 1 genomic stop codon	1	0	1	0	1	1	1	1	0
TMEM140	8469.XP_007064137.1	Transmembrane protein 140	0	0	0	0	0	0	0	Infinity	0
CIB1	8469.XP_007059617.1	Calcium and integrin-binding protein 1	6.58166	0	0.151937	0	1	14	7	0.935097	0
HDLBP	8469.XP_007067431.1	Vigilin; Derived by automated computational analysis using gene prediction method: Gnomon. Supporting evidence includes similarity to: 1 mRNA	1	0	1	0	1	1	1	1	0
NRM	8469.XP_007068301.1	Nurim	0	0	0	0	0	0	0	Infinity	0
GALNT18	8469.XP_007058764.1	Polypeptide N-acetylgalactosaminyltransferase 18; Derived by automated computational analysis using gene prediction method: Gnomon. Supporting evidence includes similarity to: 2 mRNAs	12.2808	0	0.0814279	0	1	19	5	0.868828	0
DSCC1	8469.XP_007063466.1	Sister chromatid cohesion protein DCC1	4.64088	0.00279257	0.215476	0.584211	20	12	39.95	0.957664	44004
GALNT15	8469.XP_007053307.1	Polypeptide N-acetylgalactosaminyltransferase-like protein 2; Polypeptide N-acetylgalactosaminyltransferase 15	12.2808	0	0.0814279	0	1	19	5	0.868828	0
DFNA5	8469.XP_007071651.1	DFNA5	1.66667	0	0.6	0	1	2	3	0.777778	0
TRIP13	8469.XP_007058964.1	Pachytene checkpoint protein 2 like protein; The sequence of the model RefSeq protein was modified relative to its source genomic sequence to represent the inferred complete CDS: substituted 1 base at 1 genomic stop codon; Belongs to the AAA ATPase family.	4.4852	0.000412948	0.222956	0.7151	27	11	46.6667	0.959474	18470
PRPF31	8469.XP_007070682.1	pre-mRNA processing factor 31; U4/U6 small nuclear ribonucleoprotein Prp31	5.00669	0.00532171	0.199733	0.431373	18	12	21.5	0.953411	58992
KRT15	8469.XP_007062046.1	Keratin	0	0	0	0	0	0	0	Infinity	0
DLC1	8469.XP_007071108.1	Rho GTPase-activating protein 7 isoform X1	6.47851	0.00951457	0.154356	0	2	14	3.5	0.936296	131910
KRT19	8469.XP_007062047.1	Keratin	7.92932	0	0.126114	0	1	15	2	0.919426	0
UY3_08601	8469.XP_007061492.1	WD repeat-containing protein C2orf44 homolog	0	0	0	0	0	0	0	Infinity	0
XP_007069184.1	8469.XP_007069184.1	Derived by automated computational analysis using gene prediction method: Gnomon. Supporting evidence includes similarity to: 87 Proteins	0	0	0	0	0	0	0	Infinity	0
ETNPPL	8469.XP_007054473.1	Alanine--glyoxylate aminotransferase 2-like 1; Derived by automated computational analysis using gene prediction method: Gnomon. Supporting evidence includes similarity to: 2 ESTs	2	0	0.5	0	1	3	2	0.5	0
DMRT1	8469.XP_007065642.1	Doublesex-and mab-3-related transcription factor 1; Derived by automated computational analysis using gene prediction method: Gnomon. Supporting evidence includes similarity to: 6 mRNAs	2.90909	0	0.34375	1	2	5	3.5	0.522727	0
CA10	8469.XP_007062845.1	Carbonic anhydrase-related protein 10	0	0	0	0	0	0	0	Infinity	0
SUZ12	8469.XP_007055176.1	Polycomb protein SUZ12	5.16523	0.00119298	0.193602	0.380952	7	12	5.57143	0.951567	5220
LCMT1	8469.XP_007058666.1	Leucine carboxyl methyltransferase 1	1.5	0	0.666667	0	1	2	2	0.75	0
DISC1	8469.XP_007062479.1	Disrupted in schizophrenia 1 protein; The sequence of the model RefSeq protein was modified relative to its source genomic sequence to represent the inferred complete CDS: deleted 1 base in 1 codon	5.8873	0	0.169857	0	1	13	4	0.943171	0
MAP4K5	8469.XP_007066052.1	Mitogen-activated protein kinase kinase kinase kinase 5 isoform X1	9.91786	0	0.100828	0	1	17	4	0.896304	0
XP_007070333.1	8469.XP_007070333.1	Zinc finger protein RFP-like	0	0	0	0	0	0	0	Infinity	0
ADAD1	8469.XP_007056884.1	Adenosine deaminase domain-containing protein 1	1	0	1	0	1	1	1	1	0
CUX2	8469.XP_007058373.1	Homeobox protein cut-like 2	0	0	0	0	0	0	0	Infinity	0
TRAK2	8469.XP_007071917.1	Trafficking kinesin-binding protein 2; The sequence of the model RefSeq protein was modified relative to its source genomic sequence to represent the inferred complete CDS: deleted 1 base in 1 codon	1	0	1	0	1	1	1	1	0
ARNTL	8469.XP_007058757.1	Aryl hydrocarbon receptor nuclear translocator like; Derived by automated computational analysis using gene prediction method: Gnomon. Supporting evidence includes similarity to: 7 mRNAs	6.53677	0.00191022	0.152981	0	2	14	2	0.935619	10082
XP_007065018.1	8469.XP_007065018.1	Cholesterol 24-hydroxylase-like	1.66667	0	0.6	0	1	2	3	0.777778	0
TRAK1	8469.XP_007067394.1	Trafficking kinesin-binding protein 1-like isoform X1	0	0	0	0	0	0	0	Infinity	0
NPL	8469.XP_007061203.1	N-acetylneuraminate lyase; Derived by automated computational analysis using gene prediction method: Gnomon. Supporting evidence includes similarity to: 2 mRNAs	6.69819	0	0.149294	1	2	15	3	0.933742	0
AKAP8	8469.XP_007065976.1	A-kinase anchor protein 8 isoform X1; Belongs to the AKAP95 family.	5.76218	0	0.173545	0	1	13	8	0.944626	0
PAPLN	8469.XP_007055854.1	Papilin	7.51862	0	0.133003	0	1	15	5	0.924202	0
SLC20A1	8469.XP_007066078.1	Phosphate transporter; Sodium-phosphate symporter which plays a fundamental housekeeping role in phosphate transport.	0	0	0	0	0	0	0	Infinity	0
PRIM2	8469.XP_007059954.1	DNA primase large subunit	4.50907	0.00079535	0.221775	0.627016	32	12	34.75	0.959197	23496
OPRD1	8469.XP_007064930.1	Delta-type opioid receptor-like	0	0	0	0	0	0	0	Infinity	0
SPAM1	8469.XP_007063251.1	Hyaluronoglucosaminidase; Derived by automated computational analysis using gene prediction method: Gnomon. Supporting evidence includes similarity to: 39 Proteins	1.5	0	0.666667	0	1	2	2	0.75	0
MAPRE2	8469.XP_007058844.1	Microtubule-associated protein RP/EB family member 2	5.04011	0.00682267	0.198408	0	4	12	13.25	0.953022	65188
ALDOC	8469.XP_007057754.1	Fructose-bisphosphate aldolase C	5.69436	0.000668045	0.175612	0.666667	3	13	5.33333	0.945414	9456
SGK3	8469.XP_007066262.1	Serine/threonine-protein kinase Sgk3	5.61127	0	0.178213	0	1	13	12	0.946381	0
RBM12B	8469.XP_007052965.1	RNA-binding protein 12B	0	0	0	0	0	0	0	Infinity	0
RPUSD2	8469.XP_007069470.1	RNA pseudouridylate synthase domain-containing protein 2	6.97135	0.00191022	0.143444	0	2	14	2	0.930566	10374
MMP23B	8469.XP_007070245.1	Matrix metalloproteinase-23; Belongs to the peptidase M10A family.	0	0	0	0	0	0	0	Infinity	0
RPUSD1	8469.XP_007058624.1	RNA pseudouridylate synthase domain-containing protein 1	0	0	0	0	0	0	0	Infinity	0
POC5	8469.XP_007064565.1	Centrosomal protein POC5 isoform X1	6.56829	5.14384e-05	0.152247	0	2	14	5	0.935252	130
PRPF18	8469.XP_007060986.1	pre-mRNA-splicing factor 18	5.60649	8.57988e-07	0.178365	0.9	5	13	15.2	0.946436	14
UY3_01710	8469.XP_007054239.1	Smoothelin-like protein 2-like	0	0	0	0	0	0	0	Infinity	0
IL17RD	8469.XP_007060778.1	Interleukin-17 receptor D; The sequence of the model RefSeq protein was modified relative to its source genomic sequence to represent the inferred complete CDS: inserted 1 base in 1 codon	1	0	1	0	1	1	1	1	0
IL17RE	8469.XP_007066026.1	Interleukin-17 receptor E	1	0	1	0	1	1	1	1	0
KREMEN1	8469.XP_007058463.1	Kremen protein 1-like	0	0	0	0	0	0	0	Infinity	0
PRMT3	8469.XP_007067994.1	Protein arginine N-methyltransferase 3; Belongs to the class I-like SAM-binding methyltransferase superfamily. Protein arginine N- methyltransferase family.	5.90353	0	0.16939	1	2	14	31	0.942982	0
XP_007062335.1	8469.XP_007062335.1	Zinc finger and SCAN domain-containing protein 2-like	0	0	0	0	0	0	0	Infinity	0
TOMM70A	8469.XP_007061702.1	Translocase of outer mitochondrial membrane 70; Mitochondrial import receptor subunit TOM70	1	0	1	0	1	1	1	1	0
ANKRD6	8469.XP_007063104.1	Ankyrin repeat domain-containing protein 6 isoform X1	0	0	0	0	0	0	0	Infinity	0
DLAT	8469.XP_007060543.1	Acetyltransferase component of pyruvate dehydrogenase complex; The pyruvate dehydrogenase complex catalyzes the overall conversion of pyruvate to acetyl-CoA and CO(2).	6.65712	0.000459782	0.150215	0.5	9	13	8.11111	0.93422	5528
KIF13B	8469.XP_007063317.1	Kinesin-like protein KIF13B	0	0	0	0	0	0	0	Infinity	0
TNFAIP8L1	8469.XP_007072162.1	Tumor necrosis factor alpha-induced protein 8-like protein 1	0	0	0	0	0	0	0	Infinity	0
NKIRAS2	8469.XP_007054785.1	NF-kappa-B inhibitor-interacting Ras-like protein 2 isoform X1	0	0	0	0	0	0	0	Infinity	0
GUK1	8469.XP_007055607.1	Guanylate kinase	5.07832	0.000202762	0.196916	0.333333	3	12	21.6667	0.952578	3628
UY3_07450	8469.XP_007060253.1	stAR-related lipid transfer protein 13-like	8.46896	0	0.118078	0	1	16	5	0.913152	0
ZMYM2	8469.XP_007059190.1	Zinc finger MYM-type protein 2	0	0	0	0	0	0	0	Infinity	0
UCHL1	8469.XP_007069445.1	Ubiquitin carboxyl-terminal hydrolase isozyme L1	0	0	0	0	0	0	0	Infinity	0
VLDLR	8469.XP_007065649.1	Very low-density lipoprotein receptor; Derived by automated computational analysis using gene prediction method: Gnomon. Supporting evidence includes similarity to: 1 mRNA	6.90353	0	0.144853	1	2	15	3	0.931354	0
KRT23	8469.XP_007062045.1	Keratin	0	0	0	0	0	0	0	Infinity	0
FAF2	8469.XP_007065076.1	FAS-associated factor 2	6.00191	0.0388326	0.166614	0.109091	11	13	4	0.941838	311820
INVS	8469.XP_007061879.1	Inversin	1.33333	0.666667	0.75	0	2	2	1.5	0.833333	4
ACVRL1	8469.XP_007064784.1	Serine/threonine-protein kinase receptor R3	0	0	0	0	0	0	0	Infinity	0
ITM2C	8469.XP_007062525.1	Integral membrane protein 2C	1	0	1	0	1	1	1	1	0
CC2D1B	8469.XP_007062261.1	Coiled-coil and C2 domain-containing protein 1B	0	0	0	0	0	0	0	Infinity	0
UY3_08664	8469.XP_007061590.1	Slit homolog 2 protein-like	0	0	0	0	0	0	0	Infinity	0
ATM	8469.XP_007059747.1	Serine-protein kinase ATM; The sequence of the model RefSeq protein was modified relative to its source genomic sequence to represent the inferred complete CDS: deleted 1 base in 1 codon; Belongs to the PI3/PI4-kinase family.	4.4212	0.0274138	0.226183	0.285714	22	11	20.4545	0.960219	490982
SESTD1	8469.XP_007069833.1	SEC14 domain and spectrin repeat-containing protein 1	1	0	1	0	1	1	1	1	0
LACC1	8469.XP_007061382.1	UPF0124 protein C13orf31; Laccase domain-containing protein 1	0	0	0	0	0	0	0	Infinity	0
CCDC88A	8469.XP_007070123.1	Girdin isoform X1	0	0	0	0	0	0	0	Infinity	0
UBAC2	8469.XP_007066315.1	Ubiquitin-associated domain-containing protein 2	5.74785	0.0305178	0.173978	0.190476	7	13	6	0.944792	199566
SRPK1	8469.XP_007063548.1	Serine/threonine-protein kinase SRPK1; SRSF protein kinase 1	1.5	0	0.666667	0	1	2	2	0.75	0
PARP16	8469.XP_007053564.1	poly(ADP-ribose) polymerase family member 16; Mono [ADP-ribose] polymerase PARP16	0	0	0	0	0	0	0	Infinity	0
CIDEA	8469.XP_007062431.1	Cell death-inducing DFFA-like effector a; Cell death activator CIDE-A	0	0	0	0	0	0	0	Infinity	0
SIAH1	8469.XP_007059711.1	E3 ubiquitin-protein ligase; E3 ubiquitin-protein ligase that mediates ubiquitination and subsequent proteasomal degradation of target proteins. E3 ubiquitin ligases accept ubiquitin from an E2 ubiquitin- conjugating enzyme in the form of a thioester and then directly transfers the ubiquitin to targeted substrates.	6.92837	0	0.144334	1	2	15	4	0.931066	0
PDE2A	8469.XP_007068903.1	cGMP-dependent 3'	5.73639	0.00313737	0.174326	0	3	13	5.66667	0.944926	30586
DTNA	8469.XP_007058845.1	Dystrobrevin alpha	8.58548	0.00191083	0.116476	0.333333	4	16	2.5	0.911797	45044
PTPRN2	8469.XP_007054190.1	Receptor-type tyrosine-protein phosphatase N2; Derived by automated computational analysis using gene prediction method: Gnomon. Supporting evidence includes similarity to: 12 Proteins	0	0	0	0	0	0	0	Infinity	0
CDT1	8469.XP_007059408.1	DNA replication factor Cdt1; The sequence of the model RefSeq protein was modified relative to its source genomic sequence to represent the inferred complete CDS: inserted 1 base in 1 codon	4.48329	0.00288862	0.223051	0.52043	31	12	40.2581	0.959497	48452
SRPK2	8469.XP_007066949.1	Serine/threonine-protein kinase SRPK2; SRSF protein kinase 2	0	0	0	0	0	0	0	Infinity	0
GPM6B	8469.XP_007060271.1	Neuronal membrane glycoprotein M6-b isoform X1	5.48902	0.0114065	0.182182	0	2	13	18.5	0.947802	158280
MAP9	8469.XP_007071360.1	Microtubule-associated protein 9	0	0	0	0	0	0	0	Infinity	0
INPP5J	8469.XP_007072842.1	Inositol polyphosphate-5-phosphatase J; The sequence of the model RefSeq protein was modified relative to its source genomic sequence to represent the inferred complete CDS: inserted 1 base in 1 codon	6.56543	0.000228413	0.152313	0.833333	4	14	6.5	0.935286	11036
DPH1	8469.XP_007057850.1	Diphthamide biosynthesis protein 1	5.92073	0.0112921	0.168898	0.333333	3	12	7.33333	0.942782	98756
ASUN	8469.XP_007063056.1	Integrator complex subunit 13; Derived by automated computational analysis using gene prediction method: Gnomon. Supporting evidence includes similarity to: 10 ESTs	0	0	0	0	0	0	0	Infinity	0
INPP5A	8469.XP_007053087.1	Type I inositol 1	6.1595	0.00947445	0.162351	0.333333	7	13	5.71429	0.940006	74256
NLN	8469.XP_007059060.1	Neurolysin	6.64947	0	0.150388	0	1	14	3	0.934308	0
SMIM8	8469.XP_007052640.1	Small integral membrane protein 8	0	0	0	0	0	0	0	Infinity	0
CD99L2	8469.XP_007060279.1	CD99 antigen-like protein 2	0	0	0	0	0	0	0	Infinity	0
TRMT2A	8469.XP_007055017.1	tRNA (Uracil-5-)-methyltransferase like protein A; The sequence of the model RefSeq protein was modified relative to its source genomic sequence to represent the inferred complete CDS: inserted 1 base in 1 codon; Belongs to the class I-like SAM-binding methyltransferase superfamily. RNA M5U methyltransferase family.	5.22923	9.96141e-05	0.191233	0.904762	15	13	26.0667	0.950823	3084
STC1	8469.XP_007065556.1	Stanniocalcin-1	0	0	0	0	0	0	0	Infinity	0
MGST1	8469.XP_007072817.1	Microsomal glutathione S-transferase 1; The sequence of the model RefSeq protein was modified relative to its source genomic sequence to represent the inferred complete CDS: inserted 1 base in 1 codon; substituted 1 base at 1 genomic stop codon	6.92741	1.09573e-06	0.144354	0.7	5	14	5.2	0.931077	6
ARX	8469.XP_007070571.1	Homeobox protein ARX; Derived by automated computational analysis using gene prediction method: Gnomon. Supporting evidence includes similarity to: 2 mRNAs	0	0	0	0	0	0	0	Infinity	0
INTU	8469.XP_007059210.1	PDZ domain-containing protein 6; Protein inturned	5.91404	0.00191022	0.169089	0	2	13	4	0.94286	14004
TSHZ3	8469.XP_007058717.1	Teashirt homolog 3	0	0	0	0	0	0	0	Infinity	0
MAOB	8469.XP_007064550.1	Amine oxidase [flavin-containing] B	6.30755	0.00560789	0.15854	0.466667	6	12	7	0.938284	52124
RWDD2B	8469.XP_007070783.1	RWD domain-containing protein 2B	6.31996	0	0.158229	0	1	13	4	0.93814	0
GPM6A	8469.XP_007067130.1	Neuronal membrane glycoprotein M6-a	0	0	0	0	0	0	0	Infinity	0
SMIM3	8469.XP_007071565.1	Small integral membrane protein 3	0	0	0	0	0	0	0	Infinity	0
LLGL1	8469.XP_007060135.1	Lethal(2) giant larvae protein homolog 1	0	0	0	0	0	0	0	Infinity	0
TTLL12	8469.XP_007061827.1	Tubulin--tyrosine ligase-like protein 12	5.77268	0	0.17323	0	1	13	7	0.944504	0
FAM64A	8469.XP_007054244.1	Family with sequence similarity 64 member A; Protein FAM64A	4.70296	0.00191022	0.212632	0.857143	14	12	50.3571	0.956942	28182
GUF1	8469.XP_007069402.1	Translation factor GUF1	5.58262	0.00191022	0.179127	0.714286	7	13	14.1429	0.946714	16250
PCGF2	8469.XP_007062008.1	Polycomb group RING finger protein 2	6.81089	0.00190626	0.146824	0.4	5	14	3.8	0.932432	13724
AKAP9	8469.XP_007060375.1	A-kinase anchor protein 9	6.58739	0	0.151805	0	1	14	3	0.93503	0
CD109	8469.XP_007067407.1	Uncharacterized protein; CD109 antigen	0	0	0	0	0	0	0	Infinity	0
PPAPDC1B	8469.XP_007053516.1	Phosphatidate phosphatase PPAPDC1B; Derived by automated computational analysis using gene prediction method: Gnomon. Supporting evidence includes similarity to: 20 Proteins	8.99236	0.00569779	0.111206	0.666667	4	15	4.25	0.907066	130260
DOPEY2	8469.XP_007068306.1	Protein dopey-2	0	0	0	0	0	0	0	Infinity	0
SACM1L	8469.XP_007064380.1	Phosphatidylinositide phosphatase SAC1	5.19293	0.0100356	0.192569	0.388889	9	12	8.66667	0.951245	96772
SLC6A18	8469.XP_007052716.1	Solute carrier family 6 member 18; Sodium-dependent neutral amino acid transporter B(0)AT3	7.14613	0	0.139936	0	1	14	2	0.928533	0
JMJD4	8469.XP_007059535.1	jmjC domain-containing protein 4	1	0	1	0	1	1	1	1	0
CDON	8469.XP_007066430.1	Cell adhesion molecule-related/down-regulated by oncogenes; The sequence of the model RefSeq protein was modified relative to its source genomic sequence to represent the inferred complete CDS: substituted 2 bases at 2 genomic stop codons	8.22923	0	0.121518	0	1	16	3	0.915939	0
TENC1	8469.XP_007058610.1	Tensin-like C1 domain-containing phosphatase	7.46991	0.00762992	0.13387	0	5	15	1.2	0.924768	105548
SOX4	8469.XP_007059984.1	SRY-box 4; Transcription factor SOX-4	0	0	0	0	0	0	0	Infinity	0
GLUL	8469.XP_007061207.1	Glutamine synthetase	6.12607	0.00148289	0.163237	0.571429	7	13	6.71429	0.940394	15928
CHAC2	8469.XP_007072465.1	Gamma-glutamylcyclotransferase; Catalyzes the cleavage of glutathione into 5-oxo-L- proline and a Cys-Gly dipeptide. Acts specifically on glutathione	0	0	0	0	0	0	0	Infinity	0
DPF2	8469.XP_007070396.1	Zinc finger protein ubi-d4 isoform X1	5.97421	0.00191022	0.167386	0.6	5	13	4.2	0.94216	11718
CHEK1	8469.XP_007066429.1	Serine/threonine-protein kinase Chk1	4.11748	0.0254276	0.242867	0.384615	52	11	36.4615	0.96375	401390
XP_007067714.1	8469.XP_007067714.1	Collagen alpha-2(I) chain-like	7.50812	0.00951457	0.133189	0.333333	4	15	3	0.924324	40370
RUSC1	8469.XP_007068146.1	RUN and SH3 domain-containing protein 1	1	0	1	0	1	1	1	1	0
EDNRB	8469.XP_007072727.1	Endothelin B receptor; The sequence of the model RefSeq protein was modified relative to its source genomic sequence to represent the inferred complete CDS: inserted 1 base in 1 codon; Belongs to the G-protein coupled receptor 1 family.	7.72684	0.00191022	0.129419	0.5	4	15	4.5	0.921781	33588
GOLGA3	8469.XP_007055020.1	Golgin subfamily A member 3	0	0	0	0	0	0	0	Infinity	0
UY3_18835	8469.XP_007072151.1	Cathepsin G-like; Belongs to the peptidase S1 family.	0	0	0	0	0	0	0	Infinity	0
ACSM3	8469.XP_007064427.1	Acyl-coenzyme A synthetase ACSM3	7.46896	0.00310679	0.133887	0	2	14	6	0.92478	28608
TP53RK	8469.XP_007059894.1	TP53-regulating kinase	4.82904	0.0115845	0.207081	0	2	12	21.5	0.955476	97322
ARL6IP1	8469.XP_007064442.1	ADP-ribosylation factor-like protein 6-interacting protein 1	1	0	1	0	1	1	1	1	0
SPARC	8469.XP_007071573.1	Secreted protein	6.51958	0.0187485	0.153384	0.1	5	14	2.6	0.935819	78792
APP	8469.XP_007070786.1	Amyloid beta A4 protein isoform X1	5.38013	0.0376095	0.185869	0.0384615	13	13	3.46154	0.949068	222954
METAP2	8469.XP_007069288.1	Methionine aminopeptidase 2	1	0	1	0	1	1	1	1	0
XP_007058017.1	8469.XP_007058017.1	Cytochrome c oxidase protein 20 homolog	0	0	0	0	0	0	0	Infinity	0
RUNDC1	8469.XP_007054807.1	RUN domain-containing protein 1	0	0	0	0	0	0	0	Infinity	0
MGAT4A	8469.XP_007069042.1	Alpha-1	1	0	1	0	1	1	1	1	0
APC	8469.XP_007055479.1	Adenomatous polyposis coli protein; Derived by automated computational analysis using gene prediction method: Gnomon. Supporting evidence includes similarity to: 2 mRNAs	6.92741	0.00191022	0.144354	0	2	15	3.5	0.931077	10512
RAD51	8469.XP_007069443.1	DNA repair protein RAD51 homolog 1	4.23496	0.0489162	0.23613	0.322537	39	11	33.2821	0.962384	874838
PNRC2	8469.XP_007068094.1	Proline-rich nuclear receptor coactivator 2	6	0	0.166667	1	2	13	7	0.94186	0
UY3_06616	8469.XP_007059417.1	Uncharacterized protein; Peroxisomal trans-2-enoyl-CoA reductase-like	0	0	0	0	0	0	0	Infinity	0
CDC42BPA	8469.XP_007071759.1	Serine/threonine-protein kinase MRCK alpha isoform X1	0	0	0	0	0	0	0	Infinity	0
PTPN13	8469.XP_007066694.1	Tyrosine-protein phosphatase non-receptor type 13	0	0	0	0	0	0	0	Infinity	0
CFLAR	8469.XP_007072005.1	CASP8 and FADD-like apoptosis regulator; The sequence of the model RefSeq protein was modified relative to its source genomic sequence to represent the inferred complete CDS: deleted 1 base in 1 codon; Belongs to the peptidase C14A family.	5.59503	0.00191296	0.17873	0	3	12	2.66667	0.946569	10884
SEMA4G	8469.XP_007066970.1	semaphorin-4G	6.77364	0.000635522	0.147631	0	2	14	3.5	0.932865	11670
PTPN11	8469.XP_007058442.1	Tyrosine-protein phosphatase non-receptor type 11; Belongs to the protein-tyrosine phosphatase family. Non-receptor class 2 subfamily.	5.23878	0.0160078	0.190884	0.0555556	9	13	5.44444	0.950712	126572
KCNJ16	8469.XP_007056144.1	Inward rectifier potassium channel 16	0	0	0	0	0	0	0	Infinity	0
KCNJ15	8469.XP_007064462.1	ATP-sensitive inward rectifier potassium channel 15 isoform X1	0	0	0	0	0	0	0	Infinity	0
ADRM1	8469.XP_007059862.1	Adhesion regulating molecule 1; The sequence of the model RefSeq protein was modified relative to its source genomic sequence to represent the inferred complete CDS: inserted 2 bases in 1 codon	5.92455	0.000355518	0.168789	0.666667	4	13	4.75	0.942738	2104
EFTUD1	8469.XP_007066899.1	Elongation factor Tu GTP-binding domain-containing protein 1 isoform X1	5.56925	0.00200985	0.179558	0.6	5	13	15.4	0.946869	13174
KCNIP1	8469.XP_007071523.1	Kv channel-interacting protein 1 isoform X1	0	0	0	0	0	0	0	Infinity	0
IRX5	8469.XP_007054060.1	Iroquois-class homeodomain protein IRX-5; The sequence of the model RefSeq protein was modified relative to its source genomic sequence to represent the inferred complete CDS: inserted 4 bases in 2 codons	0	0	0	0	0	0	0	Infinity	0
SEMA4D	8469.XP_007059280.1	semaphorin-4D	0	0	0	0	0	0	0	Infinity	0
SEMA4A	8469.XP_007064645.1	Lamin-A; The sequence of the model RefSeq protein was modified relative to its source genomic sequence to represent the inferred complete CDS: inserted 2 bases in 1 codon; Belongs to the intermediate filament family.	0	0	0	0	0	0	0	Infinity	0
XP_007071189.1	8469.XP_007071189.1	Centromere protein J-like	6.02292	0	0.166032	1	2	13	6.5	0.941594	0
FNIP2	8469.XP_007071346.1	Folliculin-interacting protein 2; Derived by automated computational analysis using gene prediction method: Gnomon. Supporting evidence includes similarity to: 2 mRNAs	0	0	0	0	0	0	0	Infinity	0
CTNNAL1	8469.XP_007061883.1	Catenin alpha like 1; Alpha-catulin	9.58453	0	0.104335	0	1	17	4	0.90018	0
WASF1	8469.XP_007057472.1	wiskott-Aldrich syndrome protein family member 1	6.72302	0.00145631	0.148743	0.333333	3	14	4.33333	0.933453	7234
SNRPB2	8469.XP_007064193.1	U2 small nuclear ribonucleoprotein B''	5.14995	0.00134606	0.194177	0.602564	13	12	12.6923	0.951745	14108
UY3_17166	8469.XP_007070490.1	Sperm acrosome membrane-associated protein 4-like	0	0	0	0	0	0	0	Infinity	0
XP_007053101.1	8469.XP_007053101.1	Derived by automated computational analysis using gene prediction method: Gnomon. Supporting evidence includes similarity to: 1 mRNA	4.13563	0.0502217	0.241801	0.566845	34	11	40.2059	0.963539	598192
CHADL	8469.XP_007053374.1	Chondroadherin-like protein	0	0	0	0	0	0	0	Infinity	0
XP_007069996.1	8469.XP_007069996.1	Zinc finger protein 135-like	0	0	0	0	0	0	0	Infinity	0
KIAA1210	8469.XP_007060171.1	Uncharacterized protein KIAA1210 homolog isoform X1	0	0	0	0	0	0	0	Infinity	0
AMBRA1	8469.XP_007069803.1	Activating molecule in BECN1-regulated autophagy protein 1; Derived by automated computational analysis using gene prediction method: Gnomon. Supporting evidence includes similarity to: 8 ESTs	1	0	1	0	1	1	1	1	0
SEMA3F	8469.XP_007052744.1	Semaphorin 3F; The sequence of the model RefSeq protein was modified relative to its source genomic sequence to represent the inferred complete CDS: deleted 1 base in 1 codon	6.77364	0.000635522	0.147631	0	2	14	3.5	0.932865	11670
NDNF	8469.XP_007056878.1	Fibronectin type-III domain-containing protein C4orf31; Protein NDNF isoform X1	0	0	0	0	0	0	0	Infinity	0
SEMA3G	8469.XP_007061931.1	semaphorin-3G; Belongs to the semaphorin family.	6.77364	0.000635522	0.147631	0	2	14	3.5	0.932865	11670
LUZP2	8469.XP_007067984.1	Leucine zipper protein 2 isoform X1	0	0	0	0	0	0	0	Infinity	0
ACSS2	8469.XP_007053990.1	Acetyl-coenzyme A synthetase	6.49188	0.00123946	0.154039	0.6	10	13	9.5	0.936141	14982
XP_007067427.1	8469.XP_007067427.1	Serine--pyruvate aminotransferase	6.915	0.00724944	0.144613	0.1	5	13	2	0.931221	56014
SOS2	8469.XP_007066060.1	SOS Ras/Rho guanine nucleotide exchange factor 2; Son of sevenless homolog 2	5.56829	0.00703735	0.179588	0.166667	4	13	6	0.94688	57912
SNRPA1	8469.XP_007053598.1	U2 small nuclear ribonucleoprotein A'	5.36294	0.000160595	0.186465	0.651515	12	13	12.9167	0.949268	2104
ASPH	8469.XP_007059520.1	Aspartyl/asparaginyl beta-hydroxylase	0	0	0	0	0	0	0	Infinity	0
METTL24	8469.XP_007057518.1	Methyltransferase-like protein 24	0	0	0	0	0	0	0	Infinity	0
TRAF7	8469.XP_007058660.1	E3 ubiquitin-protein ligase TRAF7; The sequence of the model RefSeq protein was modified relative to its source genomic sequence to represent the inferred complete CDS: deleted 1 base in 1 codon	0	0	0	0	0	0	0	Infinity	0
UY3_01613	8469.XP_007054164.1	Cellular tumor antigen p53; Acts as a tumor suppressor in many tumor types; induces growth arrest or apoptosis depending on the physiological circumstances and cell type. Involved in cell cycle regulation as a trans-activator that acts to negatively regulate cell division by controlling a set of genes required for this process. One of the activated genes is an inhibitor of cyclin-dependent kinase…	3.95224	0.187933	0.253021	0.0711238	38	11	15.6579	0.965672	1644282
UY3_04861	8469.XP_007057547.1	Homeobox protein MSH-C-like	7.43457	0	0.134507	0	1	15	3	0.925179	0
XP_007070723.1	8469.XP_007070723.1	Signal peptidase complex catalytic subunit SEC11A-like	0	0	0	0	0	0	0	Infinity	0
GPX7	8469.XP_007062234.1	Glutathione peroxidase 7; Belongs to the glutathione peroxidase family.	5.9341	0.00241317	0.168518	0.4	5	13	6.8	0.942627	31622
GPX8	8469.XP_007053926.1	Probable glutathione peroxidase 8; Belongs to the glutathione peroxidase family.	5.9341	0.00241317	0.168518	0.4	5	13	6.8	0.942627	31622
ELAC1	8469.XP_007063903.1	Zinc phosphodiesterase ELAC protein 1 isoform X1	5.71156	0	0.175084	1	4	14	31.25	0.945214	0
LIX1L	8469.XP_007064668.1	LIX1-like protein	0	0	0	0	0	0	0	Infinity	0
GPX3	8469.XP_007071591.1	Glutathione peroxidase; The sequence of the model RefSeq protein was modified relative to its source genomic sequence to represent the inferred complete CDS: substituted 1 base at 1 genomic stop codon; Belongs to the glutathione peroxidase family.	5.9341	0.00241317	0.168518	0.4	5	13	6.8	0.942627	31622
COL25A1	8469.XP_007054474.1	Collagen alpha-1(XXV) chain	0	0	0	0	0	0	0	Infinity	0
VWF	8469.XP_007057006.1	Von Willebrand factor	5.56638	0.00826628	0.17965	0.166667	4	13	5.25	0.946903	57472
PDCD6IP	8469.XP_007057292.1	Programmed cell death 6 interacting protein; Derived by automated computational analysis using gene prediction method: Gnomon. Supporting evidence includes similarity to: 7 ESTs	0	0	0	0	0	0	0	Infinity	0
UY3_11002	8469.XP_007064140.1	Zinc-binding protein A33; Butyrophilin subfamily 1 member A1-like	0	0	0	0	0	0	0	Infinity	0
TAPT1	8469.XP_007055447.1	Transmembrane anterior posterior transformation protein 1 homolog isoform X1	1	0	1	0	1	1	1	1	0
ZNF521	8469.XP_007057076.1	Zinc finger protein 521	0	0	0	0	0	0	0	Infinity	0
AMH	8469.XP_007070500.1	Splicing factor 3A subunit 2; Muellerian-inhibiting factor	2.09091	0.390909	0.478261	0.333333	4	4	2.75	0.727273	50
PGPEP1	8469.XP_007072195.1	Pyroglutamyl-peptidase 1	1.5	0	0.666667	0	1	2	2	0.75	0
HYDIN	8469.XP_007066341.1	Hydrocephalus-inducing protein homolog	0	0	0	0	0	0	0	Infinity	0
SIN3B	8469.XP_007072092.1	Paired amphipathic helix protein Sin3b	5.62464	0.0043237	0.177789	0.166667	4	13	5.5	0.946225	17710
OPA1	8469.XP_007069086.1	Dynamin-like 120 kDa protein	1	0	1	0	1	1	1	1	0
XP_007059581.1	8469.XP_007059581.1	Bloom syndrome protein homolog	4.66762	0.00845749	0.214242	0.368421	20	12	24.3	0.957353	123364
UY3_15477	8469.XP_007068749.1	Tubulin alpha chain; Tubulin is the major constituent of microtubules. It binds two moles of GTP	5.06877	0.0490143	0.197287	0.0666667	6	13	15.8333	0.952689	919708
ADRA1B	8469.XP_007057305.1	alpha-1B adrenergic receptor	0	0	0	0	0	0	0	Infinity	0
DUSP15	8469.XP_007062550.1	Dual specificity protein phosphatase 15	0	0	0	0	0	0	0	Infinity	0
PTPN23	8469.XP_007066468.1	Tyrosine-protein phosphatase non-receptor type 23	10.2779	0.00863521	0.0972958	0	3	16	2.66667	0.892117	33116
LSP1	8469.XP_007063030.1	Lymphocyte-specific protein 1	1	1	1	0	2	1	1	1	2
BNC2	8469.XP_007061749.1	Zinc finger protein basonuclin-2; The sequence of the model RefSeq protein was modified relative to its source genomic sequence to represent the inferred complete CDS: inserted 1 base in 1 codon	0	0	0	0	0	0	0	Infinity	0
RNF13	8469.XP_007057443.1	E3 ubiquitin-protein ligase RNF13	9.52722	0	0.104962	0	1	17	6	0.900846	0
CALCOCO1	8469.XP_007065878.1	Calcium-binding and coiled-coil domain-containing protein 1	0	0	0	0	0	0	0	Infinity	0
RNF10	8469.XP_007061613.1	RING finger protein 10; Derived by automated computational analysis using gene prediction method: Gnomon. Supporting evidence includes similarity to: 2 ESTs	0	0	0	0	0	0	0	Infinity	0
EIF4G1	8469.XP_007068445.1	Eukaryotic translation initiation factor 4 gamma 1-like	5.4766	0.000977855	0.182595	0.333333	3	13	3.66667	0.947947	8216
EIF4G3	8469.XP_007066037.1	Eukaryotic translation initiation factor 4 gamma 3	5.78223	0	0.172944	1	2	14	5	0.944393	0
SERINC3	8469.XP_007067355.1	Serine incorporator 3	0	0	0	0	0	0	0	Infinity	0
LZTR1	8469.XP_007057959.1	Leucine-zipper-like transcriptional regulator 1-like isoform X1	0	0	0	0	0	0	0	Infinity	0
GPR107	8469.XP_007061181.1	G protein-coupled receptor 107; The sequence of the model RefSeq protein was modified relative to its source genomic sequence to represent the inferred complete CDS: inserted 2 bases in 1 codon; substituted 2 bases at 2 genomic stop codons	0	0	0	0	0	0	0	Infinity	0
ESAM	8469.XP_007066448.1	Endothelial cell-selective adhesion molecule	1	0	1	0	1	1	1	1	0
SERINC1	8469.XP_007066254.1	Serine incorporator 1	6.93792	0	0.144135	0	1	14	5	0.930954	0
CDK1	8469.XP_007054897.1	Cyclin-dependent kinase 1; Belongs to the protein kinase superfamily.	3.90926	0.0607707	0.255803	0.271135	86	11	29.1279	0.966171	720996
NF1	8469.XP_007057664.1	Neurofibromin	4.80802	0.0143279	0.207986	0.166667	4	12	21.25	0.955721	132092
RCAN3	8469.XP_007068098.1	Calcipressin-3	0	0	0	0	0	0	0	Infinity	0
CDK5	8469.XP_007072319.1	Cyclin-dependent kinase 5	5.99522	0.00402572	0.166799	0	4	14	5.5	0.941916	17796
YEATS2	8469.XP_007064611.1	YEATS domain-containing protein 2	0	0	0	0	0	0	0	Infinity	0
LSM7	8469.XP_007059699.1	LSM7 homolog	5.26839	0.000975553	0.189811	0.75	8	12	13.625	0.950368	10444
2020-03-01	8469.XP_007071351.1	Membrane associated ring-CH-type finger 1; E3 ubiquitin-protein ligase MARCH1	0	0	0	0	0	0	0	Infinity	0
2020-03-03	8469.XP_007060915.1	E3 ubiquitin-protein ligase MARCH3	5.4212	0	0.184461	0	1	12	19	0.948591	0
LSM3	8469.XP_007060016.1	U6 snRNA-associated Sm-like protein LSm3	5.26839	0.000975553	0.189811	0.75	8	12	13.625	0.950368	10444
PALB2	8469.XP_007058672.1	Acyl carrier protein; Carrier of the growing fatty acid chain in fatty acid biosynthesis.	4.8978	0.0038418	0.204173	0.466667	6	12	19	0.954677	31178
TECRL	8469.XP_007069976.1	trans-2	7.58071	0	0.131914	0	1	15	2	0.92348	0
2020-03-07	8469.XP_007056720.1	E3 ubiquitin-protein ligase MARCH7	0	0	0	0	0	0	0	Infinity	0
ESRRG	8469.XP_007064809.1	Estrogen-related receptor gamma	6.37727	0	0.156807	0	1	14	10	0.937474	0
CEP350	8469.XP_007061216.1	Centrosome-associated protein 350	5.72875	0.00341276	0.174558	0.333333	4	13	5.25	0.945015	27740
TNK2	8469.XP_007057901.1	Activated CDC42 kinase 1; Belongs to the protein kinase superfamily. Tyr protein kinase family.	8.23687	0	0.121405	0	1	15	2	0.91585	0
XP_007072673.1	8469.XP_007072673.1	Epidermal growth factor receptor kinase substrate 8-like protein 3-like	7.31423	0	0.13672	0	1	14	4	0.926579	0
ANKRD28	8469.XP_007053308.1	Ankyrin repeat domain 28; Serine/threonine-protein phosphatase 6 regulatory ankyrin repeat subunit A isoform X1	0	0	0	0	0	0	0	Infinity	0
IMPG2	8469.XP_007061699.1	Interphotoreceptor matrix proteoglycan 2	0	0	0	0	0	0	0	Infinity	0
WDTC1	8469.XP_007064880.1	WD and tetratricopeptide repeats protein 1 isoform X1	5.45081	0.000361817	0.183459	0	2	12	10	0.948246	680
STRA6	8469.XP_007059968.1	Stimulated by retinoic acid gene 6 protein homolog	1.5	0	0.666667	0	1	2	2	0.75	0
ABL2	8469.XP_007061221.1	Tyrosine-protein kinase; The sequence of the model RefSeq protein was modified relative to its source genomic sequence to represent the inferred complete CDS: inserted 2 bases in 1 codon	6.05826	0.002305	0.165064	0	2	14	6	0.941183	14642
RNF170	8469.XP_007063129.1	Uncharacterized protein; Derived by automated computational analysis using gene prediction method: Gnomon. Supporting evidence includes similarity to: 16 Proteins	7.59408	0.00191022	0.131682	0	2	15	2.5	0.923325	19784
ANKRD10	8469.XP_007063966.1	Ankyrin repeat domain-containing protein 10; Derived by automated computational analysis using gene prediction method: Gnomon. Supporting evidence includes similarity to: 13 Proteins	1.33333	0.666667	0.75	0	2	2	1.5	0.833333	4
ESD	8469.XP_007058815.1	S-formylglutathione hydrolase; Serine hydrolase involved in the detoxification of formaldehyde.	0	0	0	0	0	0	0	Infinity	0
NACC2	8469.XP_007061052.1	Nucleus accumbens-associated protein 2	0	0	0	0	0	0	0	Infinity	0
PITRM1	8469.XP_007054193.1	Presequence protease	5.65043	0.00381861	0.176978	0	3	13	4.66667	0.945925	25194
HMBOX1	8469.XP_007063313.1	Homeobox containing 1; Derived by automated computational analysis using gene prediction method: Gnomon. Supporting evidence includes similarity to: 3 mRNAs	0	0	0	0	0	0	0	Infinity	0
RAD51AP1	8469.XP_007055698.1	RAD51-associated protein 1	4.62655	0.000214198	0.216144	0.853801	19	11	48.6842	0.957831	11606
XP_007070011.1	8469.XP_007070011.1	Apolipoprotein A-II-like	1	0	1	0	1	1	1	1	0
KLC1	8469.XP_007062981.1	Kinesin light chain 1; Derived by automated computational analysis using gene prediction method: Gnomon. Supporting evidence includes similarity to: 1 mRNA	7.36676	0.00191022	0.135745	0	2	15	2.5	0.925968	11252
ILDR2	8469.XP_007057648.1	Immunoglobulin like domain containing receptor 2; The sequence of the model RefSeq protein was modified relative to its source genomic sequence to represent the inferred complete CDS: inserted 2 bases in 1 codon; deleted 2 bases in 1 codon	0	0	0	0	0	0	0	Infinity	0
ITPR1	8469.XP_007061353.1	Inositol 1	6.19293	0.000407385	0.161474	0.5	5	13	7.8	0.939617	7856
CUL2	8469.XP_007072500.1	Cullin 2; Derived by automated computational analysis using gene prediction method: Gnomon. Supporting evidence includes similarity to: 1 mRNA	5.69628	0.00307431	0.175553	0	2	13	5.5	0.945392	27702
UY3_04664	8469.XP_007057332.1	alpha-1	7.78032	0	0.128529	0	1	15	6	0.921159	0
CALCRL	8469.XP_007069965.1	Calcitonin gene-related peptide type 1 receptor	1	0	1	0	1	1	1	1	0
NOTCH1	8469.XP_007061060.1	Neurogenic locus notch homolog protein 1	4.68672	0.0418254	0.213369	0.106061	12	12	8.58333	0.957131	280984
MADD	8469.XP_007054344.1	MAP kinase-activating death domain protein; Derived by automated computational analysis using gene prediction method: Gnomon. Supporting evidence includes similarity to: 1 mRNA	0	0	0	0	0	0	0	Infinity	0
FRZB	8469.XP_007069846.1	Secreted frizzled-related protein 3	0	0	0	0	0	0	0	Infinity	0
TEX9	8469.XP_007056472.1	Testis expressed 9; The sequence of the model RefSeq protein was modified relative to its source genomic sequence to represent the inferred complete CDS: deleted 1 base in 1 codon	0	0	0	0	0	0	0	Infinity	0
STIM1	8469.XP_007067709.1	Stromal interaction molecule 1	5.23018	0	0.191198	0	1	12	50	0.950812	0
RALGAPB	8469.XP_007053994.1	Ral GTPase-activating protein subunit beta-like	0	0	0	0	0	0	0	Infinity	0
CACNB2	8469.XP_007058521.1	Voltage-dependent L-type calcium channel subunit beta-2 isoform X1	10.4928	0.00191022	0.0953031	0	2	18	1.5	0.889618	8082
TEX2	8469.XP_007055163.1	Testis-expressed sequence 2 protein isoform X1	1	0	1	0	1	1	1	1	0
XP_007071937.1	8469.XP_007071937.1	Uncharacterized protein LOC102935427	0	0	0	0	0	0	0	Infinity	0
UY3_12581	8469.XP_007065778.1	Interferon-induced protein 44-like	0	0	0	0	0	0	0	Infinity	0
ANKRD44	8469.XP_007071938.1	Serine/threonine-protein phosphatase 6 regulatory ankyrin repeat subunit B isoform X1	0	0	0	0	0	0	0	Infinity	0
IGFBP4	8469.XP_007062038.1	Insulin-like growth factor-binding protein 4	0	0	0	0	0	0	0	Infinity	0
PPTC7	8469.XP_007058369.1	Protein phosphatase PTC7 homolog	1	0	1	0	1	1	1	1	0
TPD52	8469.XP_007053027.1	Tumor protein D52	0	0	0	0	0	0	0	Infinity	0
UY3_14033	8469.XP_007067199.1	ProSAP-interacting protein 1; Leucine zipper putative tumor suppressor 3-like	1.33333	0	0.75	1	2	2	2.5	0.888889	0
STK32C	8469.XP_007053089.1	Serine/threonine-protein kinase 32C	0	0	0	0	0	0	0	Infinity	0
SMARCAD1	8469.XP_007063063.1	SWI/SNF-related matrix-associated actin-dependent regulator of chromatin subfamily A containing DEAD/H box 1 isoform X1	5.26457	0	0.189949	1	2	12	31.5	0.950412	0
UY3_13745	8469.XP_007066896.1	Lamin-L(III); Derived by automated computational analysis using gene prediction method: Gnomon. Supporting evidence includes similarity to: 48 Proteins; Belongs to the intermediate filament family.	0	0	0	0	0	0	0	Infinity	0
RNF19A	8469.XP_007067249.1	E3 ubiquitin-protein ligase RNF19A; Derived by automated computational analysis using gene prediction method: Gnomon. Supporting evidence includes similarity to: 1 mRNA	0	0	0	0	0	0	0	Infinity	0
GRB14	8469.XP_007056699.1	Growth factor receptor-bound protein 14	0	0	0	0	0	0	0	Infinity	0
CDH2	8469.XP_007058873.1	Cadherin-2; Cadherins are calcium-dependent cell adhesion proteins.	0	0	0	0	0	0	0	Infinity	0
NAGLU	8469.XP_007054831.1	alpha-N-acetylglucosaminidase	6.02674	0	0.165927	0	1	14	33	0.941549	0
MAEA	8469.XP_007063760.1	Macrophage erythroblast attacher isoform X1	0	0	0	0	0	0	0	Infinity	0
ABHD11	8469.XP_007054625.1	Alpha/beta hydrolase domain-containing protein 11; Belongs to the peptidase C14A family.	0	0	0	0	0	0	0	Infinity	0
ABHD13	8469.XP_007055916.1	Alpha/beta hydrolase domain-containing protein 13	0	0	0	0	0	0	0	Infinity	0
CDH6	8469.XP_007066778.1	Cadherin-6; Cadherins are calcium-dependent cell adhesion proteins.	0	0	0	0	0	0	0	Infinity	0
UY3_18865	8469.XP_007072284.1	Perilipin-3-like; Belongs to the perilipin family.	0	0	0	0	0	0	0	Infinity	0
BZW1	8469.XP_007071924.1	Basic leucine zipper and W2 domain-containing protein 1	0	0	0	0	0	0	0	Infinity	0
AHR	8469.XP_007069579.1	Aryl hydrocarbon receptor	5.83859	0.00381679	0.171274	0	2	13	4.5	0.943737	28244
FAM107A	8469.XP_007066003.1	Protein FAM107A	0	0	0	0	0	0	0	Infinity	0
CLSTN3	8469.XP_007072393.1	Calsyntenin-3	0	0	0	0	0	0	0	Infinity	0
CHPF	8469.XP_007066531.1	Hexosyltransferase; The sequence of the model RefSeq protein was modified relative to its source genomic sequence to represent the inferred complete CDS: inserted 2 bases in 1 codon	1.66667	0	0.6	0	1	2	3	0.777778	0
ATP8A1	8469.XP_007069449.1	Probable phospholipid-transporting ATPase IA; Belongs to the cation transport ATPase (P-type) (TC 3.A.3) family. Type IV subfamily.	0	0	0	0	0	0	0	Infinity	0
COL16A1	8469.XP_007060824.1	Collagen type XVI alpha 1 chain; The sequence of the model RefSeq protein was modified relative to its source genomic sequence to represent the inferred complete CDS: substituted 2 bases at 2 genomic stop codons	0	0	0	0	0	0	0	Infinity	0
DGKE	8469.XP_007055179.1	Diacylglycerol kinase epsilon	6.7469	0	0.148216	0	1	14	8	0.933176	0
RNF141	8469.XP_007057181.1	RING finger protein 141	0	0	0	0	0	0	0	Infinity	0
PLCD4	8469.XP_007060490.1	Phosphoinositide phospholipase C; 1-phosphatidylinositol 4	5.77555	0.0017047	0.173144	0.25	8	13	7.75	0.94447	55212
INHA	8469.XP_007066533.1	Inhibin alpha chain; Inhibins and activins inhibit and activate	0	0	0	0	0	0	0	Infinity	0
HYLS1	8469.XP_007066432.1	Hydrolethalus syndrome protein 1	0	0	0	0	0	0	0	Infinity	0
ABI1	8469.XP_007058547.1	Abl interactor 1 isoform X1	6.31328	0.00740836	0.158396	0.2	5	14	3.2	0.938218	56154
TMEM159	8469.XP_007064422.1	Promethin	0	0	0	0	0	0	0	Infinity	0
XAB2	8469.XP_007065982.1	pre-mRNA-splicing factor SYF1	5.13467	0.00708119	0.194754	0.360294	17	12	11.1176	0.951922	44880
TM9SF2	8469.XP_007066296.1	Transmembrane 9 superfamily member 2	0	0	0	0	0	0	0	Infinity	0
RNF146	8469.XP_007064457.1	E3 ubiquitin-protein ligase RNF146 isoform X1	5.65425	0	0.176858	0	1	13	12	0.945881	0
WWP2	8469.XP_007062504.1	NEDD4-like E3 ubiquitin-protein ligase WWP2; Derived by automated computational analysis using gene prediction method: Gnomon. Supporting evidence includes similarity to: 1 EST	7.15091	0.00191022	0.139842	0	2	15	2.5	0.928478	14548
WWP1	8469.XP_007052979.1	NEDD4-like E3 ubiquitin-protein ligase WWP1	7.15091	0.00191022	0.139842	0	2	15	2.5	0.928478	14548
TCAIM	8469.XP_007060137.1	T-cell activation inhibitor	0	0	0	0	0	0	0	Infinity	0
MYBPH	8469.XP_007054398.1	Myosin-binding protein H	1	0	1	0	1	1	1	1	0
CARD9	8469.XP_007061162.1	Caspase recruitment domain-containing protein 9	1	1	1	0	2	1	1	1	2
AGL	8469.XP_007062666.1	Glycogen debranching enzyme	5.57307	0.018391	0.179434	0.321429	8	14	7.875	0.946825	114434
NDE1	8469.XP_007058206.1	Nuclear distribution protein nudE homolog 1	1	0	1	0	1	1	1	1	0
ANKRD66	8469.XP_007061763.1	Ankyrin repeat domain-containing protein 66	5.96371	0	0.167681	1	3	13	5.33333	0.942282	0
AGK	8469.XP_007072362.1	Acylglycerol kinase	10.9752	0.00381679	0.0911148	0.5	4	17	3.75	0.88401	104236
F10	8469.XP_007064017.1	Coagulation factor X	0	0	0	0	0	0	0	Infinity	0
BRD4	8469.XP_007065978.1	Bromodomain-containing protein 2; Derived by automated computational analysis using gene prediction method: Gnomon. Supporting evidence includes similarity to: 3 mRNAs	4.95129	0	0.201968	0	1	12	38	0.954055	0
RPRM	8469.XP_007056740.1	Protein reprimo	0	0	0	0	0	0	0	Infinity	0
GPR155	8469.XP_007060590.1	Integral membrane protein GPR155	0	0	0	0	0	0	0	Infinity	0
GCNT7	8469.XP_007059827.1	beta-1	0	0	0	0	0	0	0	Infinity	0
SF3B1	8469.XP_007072015.1	Splicing factor 3B subunit 1	4.89685	0.0262764	0.204213	0.222222	19	12	9	0.954688	147772
HS1BP3	8469.XP_007070065.1	HCLS1-binding protein 3	0	0	0	0	0	0	0	Infinity	0
RPL13	8469.XP_007059366.1	60S ribosomal protein L13 isoform X1; Belongs to the eukaryotic ribosomal protein eL13 family.	4.7851	0.0051509	0.208982	0.542857	15	12	16.6	0.955987	80104
GRAMD2	8469.XP_007056518.1	GRAM domain-containing protein 2	8.37154	0	0.119452	0	1	16	2	0.914284	0
TMEM164	8469.XP_007060210.1	The sequence of the model RefSeq protein was modified relative to its source genomic sequence to represent the inferred complete CDS: inserted 1 base in 1 codon	0	0	0	0	0	0	0	Infinity	0
TM9SF4	8469.XP_007062547.1	Transmembrane 9 superfamily member 4; Belongs to the nonaspanin (TM9SF) (TC 9.A.2) family.	1.66667	0	0.6	0	1	2	3	0.777778	0
XP_007061160.1	8469.XP_007061160.1	Centrosome-associated protein 350-like	0	0	0	0	0	0	0	Infinity	0
TANK	8469.XP_007056713.1	TRAF family member associated NFKB activator; Derived by automated computational analysis using gene prediction method: Gnomon. Supporting evidence includes similarity to: 10 Proteins	0	0	0	0	0	0	0	Infinity	0
GRAMD3	8469.XP_007060921.1	GRAM domain containing 3; Derived by automated computational analysis using gene prediction method: Gnomon. Supporting evidence includes similarity to: 19 Proteins	0	0	0	0	0	0	0	Infinity	0
UY3_18810	8469.XP_007072142.1	Lipid phosphate phosphatase-related protein type 3-like	6.9914	0	0.143033	0	1	15	10	0.930333	0
XP_007071833.1	8469.XP_007071833.1	Neuroblast differentiation-associated protein AHNAK-like	1	0	1	0	1	1	1	1	0
HBEGF	8469.XP_007059249.1	Proheparin-binding EGF-like growth factor	6.04107	0	0.165534	0	1	13	10	0.941383	0
ZNF598	8469.XP_007058653.1	Zinc finger protein 598	1	0	1	0	1	1	1	1	0
PAX8	8469.XP_007069933.1	Paired box protein Pax-8	0	0	0	0	0	0	0	Infinity	0
KIAA1467	8469.XP_007064148.1	Uncharacterized protein KIAA1467 homolog	0	0	0	0	0	0	0	Infinity	0
RIPPLY3	8469.XP_007068317.1	Protein ripply3	0	0	0	0	0	0	0	Infinity	0
PLCB3	8469.XP_007070448.1	Phosphoinositide phospholipase C; 1-phosphatidylinositol 4	5.74785	0.0222684	0.173978	0.142857	8	13	6.5	0.944792	402810
TMEM175	8469.XP_007052770.1	Transmembrane protein 175	0	0	0	0	0	0	0	Infinity	0
TET1	8469.XP_007054709.1	Methylcytosine dioxygenase TET1	0	0	0	0	0	0	0	Infinity	0
ITPK1	8469.XP_007055521.1	Inositol-tetrakisphosphate 1-kinase	7.15568	0	0.139749	1	3	14	5.66667	0.928422	0
TCF12	8469.XP_007056440.1	Transcription factor 12 isoform X1	5.64279	0	0.177217	0	1	13	10	0.946014	0
UY3_12884	8469.XP_007066112.1	Dual specificity testis-specific protein kinase 1-like	0	0	0	0	0	0	0	Infinity	0
TESC	8469.XP_007071967.1	Tescalcin; Calcineurin B homologous protein 3	0	0	0	0	0	0	0	Infinity	0
MIOS	8469.XP_007063164.1	WD repeat-containing protein mio	1	0	1	0	1	1	1	1	0
ANXA2	8469.XP_007053835.1	Annexin A2	6.80898	0.00191022	0.146865	0	2	14	1.5	0.932454	20578
CLUH	8469.XP_007057656.1	Uncharacterized protein; mRNA-binding protein involved in proper cytoplasmic distribution of mitochondria.	1	0	1	0	1	1	1	1	0
MIOX	8469.XP_007066840.1	Inositol oxygenase	8.54632	0.00381861	0.117009	0	3	15	1.66667	0.912252	29986
LDLRAP1	8469.XP_007068105.1	Low density lipoprotein receptor adapter protein 1	6.61796	0.00441394	0.151104	0	2	14	4.5	0.934675	34610
EMB	8469.XP_007052899.1	Embigin	0	0	0	0	0	0	0	Infinity	0
RSPO1	8469.XP_007060743.1	R-spondin-1	1.81818	0.709091	0.55	0.166667	4	3	3	0.795455	90
RSPO3	8469.XP_007064459.1	R-spondin-3; Derived by automated computational analysis using gene prediction method: Gnomon. Supporting evidence includes similarity to: 1 EST	3.09091	0.181818	0.323529	0	2	5	1.5	0.477273	22
NUF2	8469.XP_007061299.1	NUF2	4.32665	0.0281689	0.231126	0.633001	38	12	40.4474	0.961318	511586
CHL1	8469.XP_007061349.1	Neural cell adhesion molecule L1-like protein; Derived by automated computational analysis using gene prediction method: Gnomon. Supporting evidence includes similarity to: 3 mRNAs	0	0	0	0	0	0	0	Infinity	0
UY3_02081	8469.XP_007054627.1	Testisin; The sequence of the model RefSeq protein was modified relative to its source genomic sequence to represent the inferred complete CDS: inserted 1 base in 1 codon	0	0	0	0	0	0	0	Infinity	0
ING3	8469.XP_007053170.1	Inhibitor of growth protein 3	5.97421	0	0.167386	0	1	13	9	0.94216	0
XP_007053841.1	8469.XP_007053841.1	CD276 antigen-like	0	0	0	0	0	0	0	Infinity	0
FAM102B	8469.XP_007055269.1	Family with sequence similarity 102 member B; Protein FAM102B	6.13276	0	0.163059	1	2	13	9.5	0.940317	0
CLINT1	8469.XP_007058468.1	Clathrin interactor 1; Derived by automated computational analysis using gene prediction method: Gnomon. Supporting evidence includes similarity to: 4 ESTs	0	0	0	0	0	0	0	Infinity	0
TCF23	8469.XP_007057588.1	Transcription factor 23	0	0	0	0	0	0	0	Infinity	0
OGG1	8469.XP_007066021.1	N-glycosylase/DNA lyase	5.12703	0.000205992	0.195045	0.571429	7	12	21.5714	0.952011	9986
TRMU	8469.XP_007064591.1	tRNA 5-methylaminomethyl-2-thiouridylate methyltransferase; Derived by automated computational analysis using gene prediction method: Gnomon. Supporting evidence includes similarity to: 1 mRNA	0	0	0	0	0	0	0	Infinity	0
UY3_09341	8469.XP_007062310.1	Pantetheinase-like	9.65425	0	0.103581	0	1	17	3	0.899369	0
CDK14	8469.XP_007060377.1	Cyclin dependent kinase 14; The sequence of the model RefSeq protein was modified relative to its source genomic sequence to represent the inferred complete CDS: substituted 1 base at 1 genomic stop codon	4.95702	1.22271e-06	0.201734	0.333333	3	12	47	0.953988	18
HOXD3	8469.XP_007060577.1	Homeobox protein Hox-D3	1.5	0	0.666667	0	1	2	2	0.75	0
GALNTL6	8469.XP_007067119.1	Polypeptide N-acetylgalactosaminyltransferase-like 6	12.2808	0	0.0814279	0	1	19	5	0.868828	0
CDK12	8469.XP_007062021.1	Cyclin-dependent kinase 12 isoform X1	5.59694	0.00215909	0.178669	0	2	13	6.5	0.946547	16844
HBP1	8469.XP_007064720.1	HMG box-containing protein 1	6.62369	0	0.150973	0	1	14	4	0.934608	0
RNF103	8469.XP_007063773.1	E3 ubiquitin-protein ligase RNF103	0	0	0	0	0	0	0	Infinity	0
GLUD1	8469.XP_007069653.1	Glutamate dehydrogenase 1	5.44604	0.0486107	0.18362	0.254545	11	12	7.45455	0.948302	704856
FA2H	8469.XP_007071299.1	Fatty acid 2-hydroxylase	0	0	0	0	0	0	0	Infinity	0
PRRC2B	8469.XP_007061107.1	Protein PRRC2B	0	0	0	0	0	0	0	Infinity	0
UPF3B	8469.XP_007060183.1	Regulator of nonsense transcripts 3B; The sequence of the model RefSeq protein was modified relative to its source genomic sequence to represent the inferred complete CDS: inserted 2 bases in 1 codon; substituted 1 base at 1 genomic stop codon	5.30372	0.00320586	0.188547	0.4	6	13	7.33333	0.949957	15056
SLC16A12	8469.XP_007071653.1	Monocarboxylate transporter 12	0	0	0	0	0	0	0	Infinity	0
FZD4	8469.XP_007068642.1	Frizzled-4; Belongs to the G-protein coupled receptor Fz/Smo family.	2	0	0.5	0	1	3	3	0.666667	0
CHKA	8469.XP_007056820.1	Choline kinase alpha	1.33333	0.666667	0.75	0	2	2	1.5	0.833333	4
FZD2	8469.XP_007053897.1	Frizzled-2; Belongs to the G-protein coupled receptor Fz/Smo family.	2	0	0.5	0	1	3	3	0.666667	0
ACE	8469.XP_007062053.1	Angiotensin-converting enzyme	6.90067	0	0.144913	0	1	14	2	0.931388	0
DNAH11	8469.XP_007066240.1	Dynein heavy chain 11	0	0	0	0	0	0	0	Infinity	0
CDK19	8469.XP_007057520.1	Cyclin-dependent kinase 19	6.44508	1.16517e-05	0.155157	0.9	5	14	7.6	0.936685	122
XP_007070516.1	8469.XP_007070516.1	Uncharacterized protein LOC102947853	0	0	0	0	0	0	0	Infinity	0
NXNL2	8469.XP_007059304.1	Nucleoredoxin-like protein 2	0	0	0	0	0	0	0	Infinity	0
KIAA0319L	8469.XP_007060812.1	Dyslexia-associated protein KIAA0319-like protein homolog	0	0	0	0	0	0	0	Infinity	0
ZNF148	8469.XP_007057116.1	Zinc finger protein 148	6.56638	0	0.152291	0	1	14	2	0.935275	0
PLCG1	8469.XP_007057270.1	Phosphoinositide phospholipase C; 1-phosphatidylinositol 4	5.71442	0.00759106	0.174996	0.222222	10	13	7.3	0.945181	142738
SSR1	8469.XP_007064302.1	Signal sequence receptor subunit 1; Translocon-associated protein subunit alpha isoform X1	6.56925	0.00191022	0.152224	0	2	12	4	0.935241	6486
SERPINH1	8469.XP_007062348.1	Serpin H1; Belongs to the serpin family.	6.63801	0.00909965	0.150647	0	3	14	6.66667	0.934442	43322
PNPO	8469.XP_007062084.1	Pyridoxine-5'-phosphate oxidase	6.81375	0.00149737	0.146762	0	3	14	4.66667	0.932398	5832
CHST11	8469.XP_007066189.1	Carbohydrate sulfotransferase 11 isoform X1	0	0	0	0	0	0	0	Infinity	0
TERT	8469.XP_007052717.1	Uncharacterized protein; Telomerase reverse transcriptase	5.14995	0.00618674	0.194177	0.1	5	12	10.2	0.951745	48896
PRDX5	8469.XP_007070373.1	Peroxiredoxin 5; The sequence of the model RefSeq protein was modified relative to its source genomic sequence to represent the inferred complete CDS: inserted 1 base in 1 codon	6.0554	0	0.165142	0	1	13	11	0.941216	0
RIC8A	8469.XP_007063935.1	RIC8 guanine nucleotide exchange factor A; The sequence of the model RefSeq protein was modified relative to its source genomic sequence to represent the inferred complete CDS: inserted 1 base in 1 codon	7.73066	0	0.129355	0	1	15	7	0.921737	0
XP_007061048.1	8469.XP_007061048.1	Protein CutA homolog	0	0	0	0	0	0	0	Infinity	0
FAM149A	8469.XP_007072769.1	The sequence of the model RefSeq protein was modified relative to its source genomic sequence to represent the inferred complete CDS: inserted 2 bases in 1 codon	0	0	0	0	0	0	0	Infinity	0
SKA1	8469.XP_007055211.1	Spindle and kinetochore-associated protein 1	4.68195	4.09781e-06	0.213586	0.910526	20	12	46.15	0.957187	102
HSPA4L	8469.XP_007059211.1	Heat shock 70 kDa protein 4L isoform X1	4.91691	0.0101684	0.20338	0.238095	7	12	8.71429	0.954455	85130
RPN2	8469.XP_007057248.1	Dolichyl-diphosphooligosaccharide--protein glycosyltransferase subunit 2	6.14709	0.00212395	0.162679	0.333333	4	13	4.25	0.94015	18340
XP_007066592.1	8469.XP_007066592.1	Regulator of G-protein signaling 11-like	0	0	0	0	0	0	0	Infinity	0
PRR13	8469.XP_007065843.1	Proline-rich protein 13	0	0	0	0	0	0	0	Infinity	0
RNF122	8469.XP_007066392.1	RING finger protein 122	8.59312	0	0.116372	0	1	16	2	0.911708	0
SERPING1	8469.XP_007068506.1	Plasma protease C1 inhibitor; Belongs to the serpin family.	0	0	0	0	0	0	0	Infinity	0
PRR15	8469.XP_007053725.1	Proline-rich protein 15	0	0	0	0	0	0	0	Infinity	0
TYRO3	8469.XP_007055835.1	Tyrosine-protein kinase receptor TYRO3	1.5	0	0.666667	0	1	2	2	0.75	0
SARNP	8469.XP_007064963.1	SAP domain-containing ribonucleoprotein	5.22732	0.00543192	0.191303	0.166667	4	12	5.25	0.950845	25556
IFT88	8469.XP_007059185.1	Intraflagellar transport protein 88 homolog isoform X1	7.53677	0.0208464	0.132683	0.428571	8	15	4.625	0.923991	340494
KIAA1217	8469.XP_007058538.1	Sickle tail protein homolog	0	0	0	0	0	0	0	Infinity	0
DKK3	8469.XP_007058771.1	Dickkopf-related protein 3	0	0	0	0	0	0	0	Infinity	0
MED6	8469.XP_007055791.1	Mediator of RNA polymerase II transcription subunit 6	5.87106	0.00475847	0.170327	0.6	6	13	8.33333	0.94336	31814
XP_007058606.1	8469.XP_007058606.1	Group 10 secretory phospholipase A2-like	7.77841	0	0.128561	0	1	16	3	0.921181	0
UY3_07648	8469.XP_007060481.1	Transmembrane BAX inhibitor motif-containing protein 1; Protein lifeguard 3-like; Belongs to the BI1 family.	0	0	0	0	0	0	0	Infinity	0
DAPK3	8469.XP_007072174.1	Death-associated protein kinase 3; Belongs to the protein kinase superfamily.	0	0	0	0	0	0	0	Infinity	0
DAPK1	8469.XP_007056086.1	Death-associated protein kinase 1; The sequence of the model RefSeq protein was modified relative to its source genomic sequence to represent the inferred complete CDS: substituted 1 base at 1 genomic stop codon	4.95129	0	0.201968	0	1	12	38	0.954055	0
RPL21	8469.XP_007057947.1	60S ribosomal protein L21	4.81948	0.00800682	0.207491	0.485714	15	12	12.8667	0.955587	83764
IAH1	8469.XP_007053240.1	Isoamyl acetate-hydrolyzing esterase 1 homolog	0	0	0	0	0	0	0	Infinity	0
WSB1	8469.XP_007057662.1	WD repeat and SOCS box-containing protein 1	0	0	0	0	0	0	0	Infinity	0
TRIQK	8469.XP_007052966.1	Protein TRIQK; The sequence of the model RefSeq protein was modified relative to its source genomic sequence to represent the inferred complete CDS: substituted 1 base at 1 genomic stop codon	0	0	0	0	0	0	0	Infinity	0
XP_007055420.1	8469.XP_007055420.1	Derived by automated computational analysis using gene prediction method: Gnomon. Supporting evidence includes similarity to: 1 Protein	0	0	0	0	0	0	0	Infinity	0
CHGB	8469.XP_007068857.1	Secretogranin-1	1	0	1	0	1	1	1	1	0
ADNP2	8469.XP_007060476.1	ADNP homeobox protein 2	0	0	0	0	0	0	0	Infinity	0
FDXR	8469.XP_007065092.1	NADPH:adrenodoxin oxidoreductase	0	0	0	0	0	0	0	Infinity	0
STMN1	8469.XP_007070910.1	Stathmin	4.9064	0	0.203815	1	2	12	61	0.954577	0
CREB3L1	8469.XP_007069810.1	Cyclic AMP-responsive element-binding protein 3-like protein 1	5.64279	0	0.177217	0	1	13	10	0.946014	0
RNF114	8469.XP_007059804.1	RING finger protein 114	0	0	0	0	0	0	0	Infinity	0
UY3_02184	8469.XP_007054721.1	Core histone macro-H2A.2; Derived by automated computational analysis using gene prediction method: Gnomon. Supporting evidence includes similarity to: 9 ESTs	1	0	1	0	1	1	1	1	0
NUB1	8469.XP_007059503.1	Negative regulator of ubiquitin like proteins 1; The sequence of the model RefSeq protein was modified relative to its source genomic sequence to represent the inferred complete CDS: deleted 1 base in 1 codon	0	0	0	0	0	0	0	Infinity	0
UY3_10929	8469.XP_007064010.1	Krueppel-like factor 5-like	0	0	0	0	0	0	0	Infinity	0
GLDN	8469.XP_007066922.1	Gliomedin	0	0	0	0	0	0	0	Infinity	0
UY3_15092	8469.XP_007068349.1	Dystroglycan-like	6.5979	0.0152933	0.151563	0.0666667	6	14	3.66667	0.934908	271350
BACH1	8469.XP_007070781.1	BTB domain and CNC homolog 1; The sequence of the model RefSeq protein was modified relative to its source genomic sequence to represent the inferred complete CDS: substituted 1 base at 1 genomic stop codon	5.33142	0	0.187567	1	2	12	16	0.949635	0
ENO2	8469.XP_007069699.1	Gamma-enolase isoform X1	5.63706	0.00189022	0.177397	0.333333	4	13	5.5	0.946081	30256
ABAT	8469.XP_007053855.1	Uncharacterized protein; 4-aminobutyrate aminotransferase	6.33238	0.00391404	0.157919	0.571429	8	13	9.25	0.937996	20422
DCAF8	8469.XP_007066096.1	DDB1- and CUL4-associated factor 8	5.89207	0	0.16972	0	1	13	8	0.943115	0
UY3_11143	8469.XP_007064239.1	Rab15 effector protein-like	0	0	0	0	0	0	0	Infinity	0
RAPH1	8469.XP_007071990.1	Ras-associated and pleckstrin homology domains-containing protein 1	6.86628	0	0.145639	0	1	14	4	0.931787	0
TRRAP	8469.XP_007065430.1	Transformation/transcription domain-associated protein; The sequence of the model RefSeq protein was modified relative to its source genomic sequence to represent the inferred complete CDS: deleted 1 base in 1 codon; Belongs to the PI3/PI4-kinase family.	4.77555	0.0188642	0.2094	0.107143	8	12	11.625	0.956098	152110
CLPB	8469.XP_007068900.1	Caseinolytic peptidase B protein homolog	5.37536	0.0077874	0.186034	0.2	6	13	5	0.949124	64026
INADL	8469.XP_007059122.1	inaD-like protein	0	0	0	0	0	0	0	Infinity	0
CNTFR	8469.XP_007066596.1	Ciliary neurotrophic factor receptor subunit alpha	0	0	0	0	0	0	0	Infinity	0
RPL4	8469.XP_007059555.1	60S ribosomal protein L4; Derived by automated computational analysis using gene prediction method: Gnomon. Supporting evidence includes similarity to: 4 mRNAs	4.75931	0.0134834	0.210114	0.385714	21	12	14.8095	0.956287	142576
PNMT	8469.XP_007062104.1	Phenylethanolamine N-methyltransferase	6.58644	0	0.151827	1	3	13	6	0.935041	0
NUP37	8469.XP_007072333.1	Nucleoporin Nup37 isoform X1	5.58835	9.48093e-06	0.178944	0.9	5	13	7	0.946647	138
ASB3	8469.XP_007072464.1	Ankyrin repeat and SOCS box protein 3	0	0	0	0	0	0	0	Infinity	0
CPVL	8469.XP_007053726.1	Carboxypeptidase; The sequence of the model RefSeq protein was modified relative to its source genomic sequence to represent the inferred complete CDS: inserted 2 bases in 1 codon; Belongs to the peptidase S10 family.	0	0	0	0	0	0	0	Infinity	0
R3HDM1	8469.XP_007060944.1	R3H domain-containing protein 1	0	0	0	0	0	0	0	Infinity	0
VIM	8469.XP_007058566.1	Vimentin; Belongs to the intermediate filament family.	0	0	0	0	0	0	0	Infinity	0
QRICH1	8469.XP_007072709.1	Inosine-5'-monophosphate dehydrogenase; Catalyzes the conversion of inosine 5'-phosphate (IMP) to xanthosine 5'-phosphate (XMP)	0	0	0	0	0	0	0	Infinity	0
R3HDM4	8469.XP_007072250.1	R3H domain-containing protein 4	12.5072	0	0.0799542	1	2	19	3.5	0.866196	0
NUP35	8469.XP_007069822.1	Nucleoporin NUP53; Derived by automated computational analysis using gene prediction method: Gnomon. Supporting evidence includes similarity to: 5 Proteins	4.99331	0.00229055	0.200268	0.6	5	12	13.4	0.953566	26724
ABHD17A	8469.XP_007068622.1	Alpha/beta hydrolase domain-containing protein 17A	0	0	0	0	0	0	0	Infinity	0
EEPD1	8469.XP_007065948.1	Endonuclease/exonuclease/phosphatase family domain-containing protein 1	6.54059	0	0.152891	0	1	14	8	0.935575	0
CLCN6	8469.XP_007053796.1	Chloride transport protein 6	0	0	0	0	0	0	0	Infinity	0
MAPK11	8469.XP_007056920.1	Mitogen-activated protein kinase 11	4.83859	0.000189876	0.206672	0.333333	4	12	15.5	0.955365	2052
CLCN7	8469.XP_007066590.1	Chloride voltage-gated channel 7; H(+)/Cl(-) exchange transporter 7	0	0	0	0	0	0	0	Infinity	0
SPATA2L	8469.XP_007059372.1	Spermatogenesis-associated protein 2-like protein	1	0	1	0	1	1	1	1	0
MAPK13	8469.XP_007063546.1	Mitogen-activated protein kinase; Derived by automated computational analysis using gene prediction method: Gnomon. Supporting evidence includes similarity to: 1 mRNA	4.83859	0.000189876	0.206672	0.333333	4	12	15.5	0.955365	2052
U2SURP	8469.XP_007055063.1	U2 snRNP-associated SURP motif-containing protein; Derived by automated computational analysis using gene prediction method: Gnomon. Supporting evidence includes similarity to: 2 mRNAs	6.88921	0.00191022	0.145155	0	2	14	1.5	0.931521	9114
UY3_17724	8469.XP_007071048.1	Phosphate transporter; Sodium-phosphate symporter which plays a fundamental housekeeping role in phosphate transport.	0	0	0	0	0	0	0	Infinity	0
MAPK15	8469.XP_007061485.1	Mitogen-activated protein kinase 15	0	0	0	0	0	0	0	Infinity	0
LAMB1	8469.XP_007065721.1	Laminin subunit beta-1; Derived by automated computational analysis using gene prediction method: Gnomon. Supporting evidence includes similarity to: 6 mRNAs	6.61509	0	0.15117	0	1	14	7	0.934708	0
GALNT1	8469.XP_007058974.1	Polypeptide N-acetylgalactosaminyltransferase; Derived by automated computational analysis using gene prediction method: Gnomon. Supporting evidence includes similarity to: 1 mRNA	12.2808	0	0.0814279	0	1	19	5	0.868828	0
UY3_04492	8469.XP_007057193.1	Vitamin D 25-hydroxylase-like	1	0	1	0	1	1	1	1	0
LAMB3	8469.XP_007059671.1	Laminin subunit beta-3	6.26266	0	0.159677	0	1	13	8	0.938806	0
CCDC177	8469.XP_007054301.1	Coiled-coil domain-containing protein 177	0	0	0	0	0	0	0	Infinity	0
MBTPS1	8469.XP_007054037.1	Membrane-bound transcription factor site-1 protease	0	0	0	0	0	0	0	Infinity	0
CHGA	8469.XP_007055522.1	Uncharacterized protein; chromogranin-A	1	0	1	0	1	1	1	1	0
MDH1B	8469.XP_007071896.1	Putative malate dehydrogenase 1B; Derived by automated computational analysis using gene prediction method: Gnomon. Supporting evidence includes similarity to: 2 mRNAs	6.42216	3.33515e-05	0.155711	0.666667	3	12	7	0.936952	318
EPS8L2	8469.XP_007060971.1	Transaldolase; Transaldolase is important for the balance of metabolites in the pentose-phosphate pathway.	0	0	0	0	0	0	0	Infinity	0
CCDC181	8469.XP_007061692.1	Coiled-coil domain-containing protein 181	1	1	1	0	2	1	1	1	2
SH3TC2	8469.XP_007062409.1	SH3 domain and tetratricopeptide repeats-containing protein 2; The sequence of the model RefSeq protein was modified relative to its source genomic sequence to represent the inferred complete CDS: substituted 1 base at 1 genomic stop codon	1	0	1	0	1	1	1	1	0
MAT2A	8469.XP_007069919.1	S-adenosylmethionine synthase; Catalyzes the formation of S-adenosylmethionine from methionine and ATP.	6.43935	0	0.155295	1	2	15	4	0.936752	0
MARVELD2	8469.XP_007059305.1	MARVEL domain-containing protein 2	7.71156	0	0.129676	0	1	15	4	0.921959	0
EFS	8469.XP_007065474.1	Embryonal Fyn-associated substrate	0	0	0	0	0	0	0	Infinity	0
DNPEP	8469.XP_007068759.1	Aspartyl aminopeptidase	0	0	0	0	0	0	0	Infinity	0
HMGCL	8469.XP_007068091.1	hydroxymethylglutaryl-CoA lyase	6.74499	0.00191022	0.148258	0.6	5	13	7.8	0.933198	12700
ACVR1B	8469.XP_007064765.1	Receptor protein serine/threonine kinase; The sequence of the model RefSeq protein was modified relative to its source genomic sequence to represent the inferred complete CDS: deleted 2 bases in 1 codon	0	0	0	0	0	0	0	Infinity	0
CLCN3	8469.XP_007067111.1	H(+)/Cl(-) exchange transporter 3 isoform X1	0	0	0	0	0	0	0	Infinity	0
HMGCR	8469.XP_007064561.1	3-hydroxy-3-methylglutaryl-coenzyme A reductase	12.5081	0	0.0799481	0	1	19	4	0.866185	0
ABHD17C	8469.XP_007066904.1	Alpha/beta hydrolase domain-containing protein 17C isoform X1	0	0	0	0	0	0	0	Infinity	0
LAMA3	8469.XP_007057083.1	Laminin subunit alpha-3	5.61605	0.0219689	0.178061	0.142857	7	13	7.42857	0.946325	318802
LAMA1	8469.XP_007062383.1	Laminin subunit alpha-1	6.21585	0.00253568	0.160879	0	3	13	5.66667	0.939351	34744
DCTN5	8469.XP_007058673.1	Dynactin subunit 5	0	0	0	0	0	0	0	Infinity	0
UY3_08548	8469.XP_007061459.1	Amiloride-sensitive sodium channel subunit alpha; F-box only protein 40-like	0	0	0	0	0	0	0	Infinity	0
ATG4A	8469.XP_007060203.1	Cysteine protease; Cysteine protease required for the cytoplasm to vacuole transport (Cvt) and autophagy.	7.82904	0	0.12773	0	1	15	3	0.920593	0
IRF2	8469.XP_007054527.1	Interferon regulatory factor 2	0	0	0	0	0	0	0	Infinity	0
CDHR2	8469.XP_007065074.1	Cadherin related family member 2; The sequence of the model RefSeq protein was modified relative to its source genomic sequence to represent the inferred complete CDS: substituted 1 base at 1 genomic stop codon	0	0	0	0	0	0	0	Infinity	0
PEX6	8469.XP_007072756.1	Peroxisome assembly factor 2; The sequence of the model RefSeq protein was modified relative to its source genomic sequence to represent the inferred complete CDS: inserted 1 base in 1 codon; substituted 3 bases at 3 genomic stop codons; Belongs to the AAA ATPase family.	7.22636	0	0.138382	0	1	14	2	0.9276	0
LMBRD2	8469.XP_007064167.1	LMBR1 domain-containing protein 2	0	0	0	0	0	0	0	Infinity	0
TBC1D2	8469.XP_007057993.1	TBC1 domain family member 2A	0	0	0	0	0	0	0	Infinity	0
SFPQ	8469.XP_007060816.1	Splicing factor	6.00096	0.0020553	0.16664	0.4	5	13	7	0.941849	17562
RCN1	8469.XP_007067955.1	Reticulocalbin-1; Derived by automated computational analysis using gene prediction method: Gnomon. Supporting evidence includes similarity to: 1 mRNA	5.91786	0	0.16898	0	1	13	13	0.942816	0
DDX52	8469.XP_007057674.1	DExD-box helicase 52; The sequence of the model RefSeq protein was modified relative to its source genomic sequence to represent the inferred complete CDS: deleted 1 base in 1 codon	5.11175	0.00123631	0.195628	0.683077	26	13	22.4231	0.952189	25284
SSTR1	8469.XP_007065305.1	Somatostatin receptor type 1; Derived by automated computational analysis using gene prediction method: Gnomon. Supporting evidence includes similarity to: 3 mRNAs	0	0	0	0	0	0	0	Infinity	0
DDX54	8469.XP_007061429.1	ATP-dependent RNA helicase DDX54; Belongs to the DEAD box helicase family.	5.07736	0.00226637	0.196953	0.683333	25	13	22.76	0.952589	35168
ARHGEF16	8469.XP_007070223.1	PR domain zinc finger protein 16; Derived by automated computational analysis using gene prediction method: Gnomon. Supporting evidence includes similarity to: 20 Proteins	6.11461	0.000816822	0.163543	0	2	14	4	0.940528	3022
EED	8469.XP_007060662.1	Polycomb protein EED isoform X1	5.35626	0.000132327	0.186698	0.666667	4	12	6	0.949346	1206
DYNLT1	8469.XP_007059158.1	Dynein light chain Tctex-type 1	0	0	0	0	0	0	0	Infinity	0
UTP11L	8469.XP_007060736.1	U3 small nucleolar RNA-associated protein 11; Involved in nucleolar processing of pre-18S ribosomal RNA.	5.10602	0.000789154	0.195847	0.669118	17	13	24.1765	0.952256	16026
RBM17	8469.XP_007056591.1	RNA binding motif protein 17; Splicing factor 45 isoform X1	5.89207	0.00381679	0.16972	0	2	13	10.5	0.943115	18224
ARHGEF10	8469.XP_007058807.1	Rho guanine nucleotide exchange factor 10	0	0	0	0	0	0	0	Infinity	0
UTP15	8469.XP_007064555.1	U3 small nucleolar RNA-associated protein 15 homolog	5.09456	0.00215387	0.196288	0.621083	27	13	21.6296	0.952389	35766
LRRFIP1	8469.XP_007069205.1	Leucine-rich repeat flightless-interacting protein 1	0	0	0	0	0	0	0	Infinity	0
ZNF385C	8469.XP_007054787.1	Zinc finger protein 385C; Derived by automated computational analysis using gene prediction method: Gnomon. Supporting evidence includes similarity to: 2 Proteins	0	0	0	0	0	0	0	Infinity	0
UBE2Q1	8469.XP_007067886.1	Ubiquitin-conjugating enzyme E2 Q1; Belongs to the ubiquitin-conjugating enzyme family.	0	0	0	0	0	0	0	Infinity	0
BCL7A	8469.XP_007058362.1	B-cell CLL/lymphoma 7 protein family member A	5.45272	0.00374413	0.183395	0.6	5	13	5.6	0.948224	32042
PPP1R9B	8469.XP_007062071.1	Neurabin-2	0	0	0	0	0	0	0	Infinity	0
GPHN	8469.XP_007054326.1	Gephyrin	7.07736	0	0.141296	0	1	15	5	0.929333	0
AFF4	8469.XP_007063678.1	AF4/FMR2 family member 4	6.71251	0.00381861	0.148976	0.166667	4	14	4.25	0.933575	21598
CHD2	8469.XP_007060428.1	Chromodomain-helicase-DNA-binding protein 2; The sequence of the model RefSeq protein was modified relative to its source genomic sequence to represent the inferred complete CDS: deleted 1 base in 1 codon	6.22827	0	0.160558	1	2	14	5	0.939206	0
SOBP	8469.XP_007057460.1	Sine oculis-binding protein homolog	1	0	1	0	1	1	1	1	0
HMGB1	8469.XP_007064840.1	High mobility group protein B1	4.87966	0.00366015	0.204932	0	2	12	22.5	0.954888	17218
MTR	8469.XP_007069076.1	Methionine synthase	5.54346	0.00752734	0.180393	0.166667	4	14	4.75	0.947169	60806
UY3_10707	8469.XP_007063830.1	Solute carrier family 2	0	0	0	0	0	0	0	Infinity	0
HMGB3	8469.XP_007060164.1	High mobility group protein B3; Derived by automated computational analysis using gene prediction method: Gnomon. Supporting evidence includes similarity to: 5 mRNAs	0	0	0	0	0	0	0	Infinity	0
CHD5	8469.XP_007070280.1	chromodomain-helicase-DNA-binding protein 5-like	6.93314	0	0.144235	0	1	14	2	0.93101	0
DDX42	8469.XP_007061954.1	ATP-dependent RNA helicase DDX42	5.89589	0	0.16961	0	1	13	19	0.943071	0
CNRIP1	8469.XP_007062926.1	CB1 cannabinoid receptor-interacting protein 1	6.66189	0	0.150108	0	1	14	4	0.934164	0
DDX3X	8469.XP_007064507.1	DEAD-box helicase 3	4.84623	0.0239108	0.206346	0.0952381	7	13	9.57143	0.955276	114956
PRR7	8469.XP_007065058.1	Proline-rich protein 7	0	0	0	0	0	0	0	Infinity	0
MCUR1	8469.XP_007054945.1	Coiled-coil domain-containing protein 90A; Mitochondrial calcium uniporter regulator 1	1	0	1	0	1	1	1	1	0
SNED1	8469.XP_007067453.1	Sushi	0	0	0	0	0	0	0	Infinity	0
PHF19	8469.XP_007061047.1	PHD finger protein 19	5.40019	0	0.185179	1	2	12	8	0.948835	0
LSM14A	8469.XP_007058701.1	Protein LSM14 homolog A isoform X1	6.69054	0	0.149465	0	1	13	5	0.933831	0
UY3_05867	8469.XP_007058621.1	Keratin	0	0	0	0	0	0	0	Infinity	0
TAB3	8469.XP_007063174.1	TGF-beta-activated kinase 1 and MAP3K7-binding protein 3; Derived by automated computational analysis using gene prediction method: Gnomon. Supporting evidence includes similarity to: 9 ESTs	0	0	0	0	0	0	0	Infinity	0
STT3A	8469.XP_007066428.1	Dolichyl-diphosphooligosaccharide--protein glycosyltransferase subunit STT3A	5.41261	0.00910624	0.184754	0.333333	4	13	12.5	0.948691	63004
RSRP1	8469.XP_007068102.1	Arginine and serine rich protein 1; UPF0471 protein C1orf63 homolog	0	0	0	0	0	0	0	Infinity	0
FAM175A	8469.XP_007065715.1	BRCA1-A complex subunit Abraxas	5.23496	0.000402691	0.191024	0.4	5	12	10.4	0.950756	3074
UY3_11254	8469.XP_007064354.1	Sjoegren syndrome nuclear autoantigen 1 homolog	0	0	0	0	0	0	0	Infinity	0
PQLC1	8469.XP_007060458.1	PQ-loop repeat-containing protein 1 isoform X1	0	0	0	0	0	0	0	Infinity	0
BMP1	8469.XP_007066393.1	Metalloendopeptidase; Bone morphogenetic protein 1	2.25	0	0.444444	0	1	3	2	0.583333	0
GCLC	8469.XP_007055124.1	Glutamate--cysteine ligase catalytic subunit	5.61414	0.0157501	0.178122	0.222222	9	13	6.44444	0.946347	111376
BMP4	8469.XP_007072745.1	Bone morphogenetic protein 4; The sequence of the model RefSeq protein was modified relative to its source genomic sequence to represent the inferred complete CDS: substituted 1 base at 1 genomic stop codon	3.72727	0	0.268293	0	1	6	2	0.318182	0
SSH1	8469.XP_007058391.1	Protein phosphatase Slingshot homolog 1	9.18816	0	0.108836	1	2	16	2.5	0.904789	0
ZFHX4	8469.XP_007053031.1	Zinc finger homeobox protein 4	0	0	0	0	0	0	0	Infinity	0
SUPT5H	8469.XP_007072536.1	Transcription elongation factor SPT5 isoform X1	5.54155	0.00920265	0.180455	0.0357143	8	13	5.625	0.947191	48952
XP_007060551.1	8469.XP_007060551.1	Protein FAM154A-like	0	0	0	0	0	0	0	Infinity	0
KLHL22	8469.XP_007063808.1	Kelch-like protein 22-like	7.3916	0.0133795	0.135289	0	2	13	2.5	0.925679	50554
CCDC136	8469.XP_007067493.1	Coiled-coil domain-containing protein 136	0	0	0	0	0	0	0	Infinity	0
IVNS1ABP	8469.XP_007056760.1	Influenza virus NS1A-binding protein homolog	0	0	0	0	0	0	0	Infinity	0
CCDC134	8469.XP_007053406.1	The sequence of the model RefSeq protein was modified relative to its source genomic sequence to represent the inferred complete CDS: substituted 1 base at 1 genomic stop codon	0	0	0	0	0	0	0	Infinity	0
PRPH	8469.XP_007064802.1	Peripherin; Belongs to the intermediate filament family.	0	0	0	0	0	0	0	Infinity	0
BRINP3	8469.XP_007063041.1	BMP/retinoic acid-inducible neural-specific protein 3	0	0	0	0	0	0	0	Infinity	0
CAMTA1	8469.XP_007060392.1	Calmodulin-binding transcription activator 1	0	0	0	0	0	0	0	Infinity	0
NPHP3	8469.XP_007064370.1	Nephrocystin 3; Derived by automated computational analysis using gene prediction method: Gnomon. Supporting evidence includes similarity to: 1 mRNA	2	0	0.5	0	1	3	2	0.5	0
XP_007063033.1	8469.XP_007063033.1	Tumor necrosis factor receptor superfamily member 6-like	6.59408	0	0.151651	0	1	13	3	0.934953	0
KIF3A	8469.XP_007063685.1	Kinesin family member 3A; Derived by automated computational analysis using gene prediction method: Gnomon. Supporting evidence includes similarity to: 1 mRNA	8.53391	0.00191022	0.11718	0	2	16	4.5	0.912396	30970
KIF3B	8469.XP_007062544.1	Kinesin-like protein KIF3B	9.53295	0	0.104899	0	1	17	2	0.90078	0
BRINP1	8469.XP_007057382.1	Deleted in bladder cancer protein 1 like protein; The sequence of the model RefSeq protein was modified relative to its source genomic sequence to represent the inferred complete CDS: deleted 1 base in 1 codon	0	0	0	0	0	0	0	Infinity	0
CCNB1	8469.XP_007059073.1	Cyclin B1; G2/mitotic-specific cyclin-B1	4.01433	0.0187841	0.249108	0.425989	60	11	35.0167	0.96495	391976
CCNB2	8469.XP_007056452.1	G2/mitotic-specific cyclin-B2; The sequence of the model RefSeq protein was modified relative to its source genomic sequence to represent the inferred complete CDS: deleted 2 bases in 1 codon; Belongs to the cyclin family.	4.14995	0.0197554	0.240967	0.389266	60	11	32.9	0.963373	288320
RTN4	8469.XP_007070133.1	Reticulon-4	7.9255	0.017097	0.126175	0.166667	4	15	3.5	0.919471	135238
SUPT6H	8469.XP_007057835.1	Transcription elongation factor spt6; Transcription elongation factor that enhances transcription elongation by RNA polymerase II (RNAPII).	5.38109	0.0101358	0.185836	0.133333	6	13	10.3333	0.949057	49968
RASGRP2	8469.XP_007070472.1	RAS guanyl-releasing protein 2	6.74021	0	0.148363	0	1	14	5	0.933253	0
PSEN2	8469.XP_007071762.1	Presenilin-2; Derived by automated computational analysis using gene prediction method: Gnomon. Supporting evidence includes similarity to: 1 mRNA	5.60076	3.51879e-05	0.178547	0.833333	4	13	8	0.946503	178
KLHL17	8469.XP_007070267.1	Pleckstrin like proteiny domain-containing family N member 1; The sequence of the model RefSeq protein was modified relative to its source genomic sequence to represent the inferred complete CDS: inserted 1 base in 1 codon	0	0	0	0	0	0	0	Infinity	0
SLC1A1	8469.XP_007065683.1	Excitatory amino acid transporter 3	0	0	0	0	0	0	0	Infinity	0
SEL1L	8469.XP_007070714.1	Protein sel-1 homolog 1	6.78128	0.00575484	0.147465	0.0666667	6	14	4.16667	0.932776	33482
NPR3	8469.XP_007069491.1	Atrial natriuretic peptide receptor 3-like	0	0	0	0	0	0	0	Infinity	0
ARHGEF28	8469.XP_007064574.1	Rho guanine nucleotide exchange factor 28	6.43362	0	0.155433	0	1	14	5	0.936818	0
KLHL15	8469.XP_007070531.1	Kelch-like protein 15	3.71429	0	0.269231	0	1	6	2	0.0952381	0
YTHDC1	8469.XP_007064260.1	YTH domain-containing protein 1 isoform X1	1.75	0	0.571429	0	1	2	4	0.8125	0
NPR1	8469.XP_007067906.1	Natriuretic peptide receptor 1; The sequence of the model RefSeq protein was modified relative to its source genomic sequence to represent the inferred complete CDS: substituted 1 base at 1 genomic stop codon	6.48233	1.46097e-05	0.154266	0.333333	3	14	4.33333	0.936252	16
KLHL14	8469.XP_007058851.1	Kelch-like protein 14	0	0	0	0	0	0	0	Infinity	0
RTN1	8469.XP_007065376.1	reticulon-1-A isoform X1	9.91786	0	0.100828	0	1	17	4	0.896304	0
PSMD11	8469.XP_007053883.1	26S proteasome non-ATPase regulatory subunit 11	5.58835	0.00308104	0.178944	0.266667	6	13	5.33333	0.946647	15250
DPEP1	8469.XP_007059415.1	Dipeptidase 1; Belongs to the metallo-dependent hydrolases superfamily. Peptidase M19 family.	0	0	0	0	0	0	0	Infinity	0
SBDS	8469.XP_007054262.1	Ribosome maturation protein SBDS	5.97421	0.00394725	0.167386	0	3	13	3.66667	0.94216	21596
FAM173A	8469.XP_007060796.1	Protein FAM173A	0	0	0	0	0	0	0	Infinity	0
ERN1	8469.XP_007055195.1	Endoplasmic reticulum to nucleus signaling 1; Serine/threonine-protein kinase/endoribonuclease IRE1	0	0	0	0	0	0	0	Infinity	0
SUPT7L	8469.XP_007071744.1	STAGA complex 65 subunit gamma	6.44413	0	0.15518	1	2	14	7.5	0.936696	0
NPNT	8469.XP_007054455.1	Nephronectin	0	0	0	0	0	0	0	Infinity	0
SLC30A5	8469.XP_007059072.1	Solute carrier family 30 member 5; Derived by automated computational analysis using gene prediction method: Gnomon. Supporting evidence includes similarity to: 16 ESTs	0	0	0	0	0	0	0	Infinity	0
OSR1	8469.XP_007070055.1	Protein odd-skipped-related 1	0	0	0	0	0	0	0	Infinity	0
TPRA1	8469.XP_007060077.1	Transmembrane protein adipocyte-associated 1 homolog	0	0	0	0	0	0	0	Infinity	0
UY3_09190	8469.XP_007062177.1	Amidase; Fatty acid amide hydrolase-like	0	0	0	0	0	0	0	Infinity	0
SCARA3	8469.XP_007071395.1	Scavenger receptor class A member 3	0	0	0	0	0	0	0	Infinity	0
PDGFRA	8469.XP_007071163.1	Platelet-derived growth factor receptor alpha; Belongs to the protein kinase superfamily. Tyr protein kinase family. CSF-1/PDGF receptor subfamily.	5.45845	0.000848648	0.183202	0.238095	7	13	7	0.948158	15262
KIRREL3	8469.XP_007066425.1	Kin of IRRE-like protein 3; Derived by automated computational analysis using gene prediction method: Gnomon. Supporting evidence includes similarity to: 2 mRNAs	0	0	0	0	0	0	0	Infinity	0
SBF1	8469.XP_007066838.1	Myotubularin-related protein 5; Belongs to the protein-tyrosine phosphatase family. Non-receptor class myotubularin subfamily.	1	0	1	0	1	1	1	1	0
OSTF1	8469.XP_007065673.1	Osteoclast-stimulating factor 1	0	0	0	0	0	0	0	Infinity	0
EP300	8469.XP_007053372.1	The sequence of the model RefSeq protein was modified relative to its source genomic sequence to represent the inferred complete CDS: inserted 2 bases in 1 codon	4.64374	0.0287037	0.215343	0.0444444	10	12	8.1	0.957631	168876
UY3_17616	8469.XP_007070943.1	Uncharacterized protein; Putative methyltransferase KIAA1456 homolog	0	0	0	0	0	0	0	Infinity	0
PALM	8469.XP_007072253.1	Paralemmin-1	0	0	0	0	0	0	0	Infinity	0
KHSRP	8469.XP_007066415.1	KH-type splicing regulatory protein; Far upstream element-binding protein 2	6.77937	0.00191022	0.147506	0.333333	3	14	3	0.932798	14350
MPZ	8469.XP_007052861.1	Myelin protein P0	10.9121	0	0.0916411	0	1	18	3	0.884743	0
CAPN7	8469.XP_007066543.1	Calpain-7; Belongs to the peptidase C2 family.	1.5	0	0.666667	0	1	2	2	0.75	0
RGS3	8469.XP_007064586.1	Regulator of G-protein signaling 3	0	0	0	0	0	0	0	Infinity	0
JADE2	8469.XP_007053632.1	Protein Jade-2; Derived by automated computational analysis using gene prediction method: Gnomon. Supporting evidence includes similarity to: 2 mRNAs	6.5893	0	0.151761	0	1	14	3	0.935008	0
XP_007071925.1	8469.XP_007071925.1	Aldehyde oxidase 1-like	6.44986	0.00275881	0.155042	0.571429	8	13	8.75	0.93663	21372
KLHL36	8469.XP_007059337.1	Kelch like family member 36; The sequence of the model RefSeq protein was modified relative to its source genomic sequence to represent the inferred complete CDS: inserted 2 bases in 1 codon	0	0	0	0	0	0	0	Infinity	0
DCLRE1B	8469.XP_007059658.1	5' exonuclease Apollo	6.27507	0	0.159361	0	1	13	3	0.938662	0
ENGASE	8469.XP_007069144.1	Cytosolic endo-beta-N-acetylglucosaminidase; Derived by automated computational analysis using gene prediction method: Gnomon. Supporting evidence includes similarity to: 6 Proteins	0	0	0	0	0	0	0	Infinity	0
SPC25	8469.XP_007056663.1	Kinetochore protein Spc25	4.55492	0.00022325	0.219543	0.748918	22	12	47.2727	0.958664	5846
ESYT2	8469.XP_007054177.1	Extended synaptotagmin-2	0	0	0	0	0	0	0	Infinity	0
XP_007061321.1	8469.XP_007061321.1	Uncharacterized protein C14orf80 homolog	0	0	0	0	0	0	0	Infinity	0
UY3_08574	8469.XP_007061473.1	2-acylglycerol O-acyltransferase 2-A-like	9.98185	0.00380583	0.100182	0.6	5	16	4	0.89556	104224
ALDH4A1	8469.XP_007067785.1	Delta-1-pyrroline-5-carboxylate dehydrogenase	6.00382	0.00063691	0.166561	0.8	6	13	9.33333	0.941816	7986
PLEKHA8	8469.XP_007053333.1	Pleckstrin like proteiny domain-containing family A member 8; The sequence of the model RefSeq protein was modified relative to its source genomic sequence to represent the inferred complete CDS: inserted 1 base in 1 codon	6.6084	0	0.151322	0	1	14	7	0.934786	0
DOHH	8469.XP_007070088.1	Deoxyhypusine monooxygenase; Catalyzes the hydroxylation of the N(6)-(4-aminobutyl)- L-lysine intermediate to form hypusine	5.55301	0.00762611	0.180083	0.619048	7	13	22.1429	0.947058	85576
RPA2	8469.XP_007066149.1	Replication protein A 32 kDa subunit	4.31423	0.0138472	0.231791	0.428571	35	11	30.4	0.961462	177952
PLEKHA6	8469.XP_007065223.1	Pleckstrin like proteiny domain-containing family A member 6; The sequence of the model RefSeq protein was modified relative to its source genomic sequence to represent the inferred complete CDS: inserted 1 base in 1 codon	1	0	1	0	1	1	1	1	0
TMUB1	8469.XP_007069884.1	Transmembrane and ubiquitin-like domain-containing protein 1	7.59026	0.00572335	0.131748	0	3	15	2.33333	0.923369	59344
MOK	8469.XP_007062959.1	MAPK/MAK/MRK overlapping kinase; Derived by automated computational analysis using gene prediction method: Gnomon. Supporting evidence includes similarity to: 1 mRNA	0	0	0	0	0	0	0	Infinity	0
ERCC6L2	8469.XP_007056080.1	Putative DNA repair and recombination protein RAD26-like	5.93505	0	0.168491	0	1	13	12	0.942616	0
NPM1	8469.XP_007071528.1	Nucleophosmin isoform X1	4.95129	0	0.201968	0	1	12	38	0.954055	0
TEFM	8469.XP_007055174.1	Transcription elongation factor	7.1213	0	0.140424	0	1	15	5	0.928822	0
PAK4	8469.XP_007068338.1	Serine/threonine-protein kinase PAK 4	7.19484	0.0057197	0.138988	0	2	14	4	0.927967	43974
CCT5	8469.XP_007057860.1	T-complex protein 1 subunit epsilon; Molecular chaperone; assists the folding of proteins upon ATP hydrolysis.	4.33142	0.0533108	0.230871	0.104762	15	11	13.1333	0.961263	364306
HSF1	8469.XP_007068913.1	Heat shock factor protein 1	5.29704	0.00144192	0.188785	0	2	13	10	0.950034	6916
EXOSC9	8469.XP_007056893.1	Exosome complex component RRP45	5.87775	5.80215e-05	0.170133	0.5	4	14	20.5	0.943282	602
FAM172A	8469.XP_007054133.1	Protein FAM172A isoform X1	0	0	0	0	0	0	0	Infinity	0
PAK1	8469.XP_007067463.1	P21 (RAC1) activated kinase 1; The sequence of the model RefSeq protein was modified relative to its source genomic sequence to represent the inferred complete CDS: substituted 1 base at 1 genomic stop codon	7.20057	0	0.138878	0	1	14	5	0.9279	0
CAMKK2	8469.XP_007058349.1	Calcium/calmodulin-dependent protein kinase kinase 2; Belongs to the protein kinase superfamily.	5.72302	0	0.174733	0	1	13	5	0.945081	0
CRIP1	8469.XP_007061320.1	Cysteine-rich protein 1	0	0	0	0	0	0	0	Infinity	0
UY3_05946	8469.XP_007058710.1	Fanconi anemia-associated protein of 24 kDa	5.19484	0.000255497	0.192499	0.5	4	12	14.5	0.951223	2880
DERL2	8469.XP_007054210.1	Derlin-2	6.94365	0.0210557	0.144017	0.1	5	14	5	0.930888	166178
TMPRSS2	8469.XP_007064535.1	Transmembrane protease serine 2	1	1	1	0	2	1	1	1	2
IGHMBP2	8469.XP_007056815.1	DNA-binding protein SMUBP-2	0	0	0	0	0	0	0	Infinity	0
SATB2	8469.XP_007071930.1	Special AT-rich sequence-binding protein; DNA-binding protein SATB2	0	0	0	0	0	0	0	Infinity	0
STX16	8469.XP_007059840.1	Syntaxin-16; Derived by automated computational analysis using gene prediction method: Gnomon. Supporting evidence includes similarity to: 2 ESTs	6.67049	0.0132948	0.149914	0.333333	3	14	4.66667	0.934064	120600
UY3_17130	8469.XP_007070416.1	Chaperone activity of bc1 complex-like	0	0	0	0	0	0	0	Infinity	0
TMPRSS9	8469.XP_007059698.1	Transmembrane protease serine 9; Belongs to the peptidase S1 family.	0	0	0	0	0	0	0	Infinity	0
DBN1	8469.XP_007065059.1	Drebrin	1	0	1	0	1	1	1	1	0
CD47	8469.XP_007057625.1	CD47 molecule; Leukocyte surface antigen CD47	7.06495	0.00191022	0.141544	0	2	14	2	0.929477	9328
XP_007069685.1	8469.XP_007069685.1	Kinesin-like protein KIF2C-like	4.45272	0.0208491	0.224582	0.576829	41	12	36.2683	0.959852	459460
CSDE1	8469.XP_007059667.1	Cold shock domain-containing protein E1 isoform X1	1	0	1	0	1	1	1	1	0
UY3_08226	8469.XP_007061172.1	Coiled-coil domain-containing protein 180-like	0	0	0	0	0	0	0	Infinity	0
XP_007070251.1	8469.XP_007070251.1	cyclin-L1-like	5.22732	0	0.191303	0	1	12	56	0.950845	0
SUPT3H	8469.XP_007061792.1	Transcription initiation protein SPT3 homolog	5.61891	0.00520318	0.17797	0.3	5	13	7.2	0.946292	46486
MRPS6	8469.XP_007063667.1	28S ribosomal protein S6	5.24546	0.00197742	0.190641	0.530303	12	12	16	0.950634	30324
MMEL1	8469.XP_007070227.1	Membrane metallo-endopeptidase-like 1; Derived by automated computational analysis using gene prediction method: Gnomon. Supporting evidence includes similarity to: 3 mRNAs	0	0	0	0	0	0	0	Infinity	0
KIF23	8469.XP_007059571.1	Kinesin-like protein KIF23; Belongs to the TRAFAC class myosin-kinesin ATPase superfamily. Kinesin family.	4.43266	0.00165334	0.225598	0.600465	42	12	41.2857	0.960085	58794
ANO6	8469.XP_007064064.1	Anoctamin-6	0	0	0	0	0	0	0	Infinity	0
KIF24	8469.XP_007063375.1	Kinesin-like protein KIF24; Belongs to the TRAFAC class myosin-kinesin ATPase superfamily. Kinesin family.	6.58166	0.00191022	0.151937	0	2	14	2.5	0.935097	30962
COMMD3	8469.XP_007058569.1	COMM domain-containing protein 3	0	0	0	0	0	0	0	Infinity	0
ANO9	8469.XP_007056812.1	Anoctamin-9	0	0	0	0	0	0	0	Infinity	0
NCOA4	8469.XP_007067329.1	Nuclear receptor coactivator 4	0	0	0	0	0	0	0	Infinity	0
NCOA1	8469.XP_007066990.1	Nuclear receptor coactivator 1; Derived by automated computational analysis using gene prediction method: Gnomon. Supporting evidence includes similarity to: 1 mRNA	5.37822	0.0178671	0.185935	0.0222222	10	13	3.4	0.94909	135320
CTSC	8469.XP_007063194.1	Dipeptidyl peptidase 1; Belongs to the peptidase C1 family.	0	0	0	0	0	0	0	Infinity	0
CTSD	8469.XP_007066674.1	Cathepsin D; Belongs to the peptidase A1 family.	7.68386	0.00191022	0.130143	0.333333	3	15	2.33333	0.922281	60324
ACADS	8469.XP_007061616.1	Short-chain specific acyl-CoA dehydrogenase	6.98663	0.00623358	0.143131	0.190476	7	13	5.28571	0.930388	47718
QSOX2	8469.XP_007061055.1	Sulfhydryl oxidase 2	0	0	0	0	0	0	0	Infinity	0
UY3_17460	8469.XP_007070771.1	WD repeat-containing protein 73-like	5.33524	0.00177872	0.187433	0.2	5	13	7.8	0.94959	15394
CTSH	8469.XP_007059608.1	Pro-cathepsin H; Belongs to the peptidase C1 family.	8.6829	0	0.115169	0	1	16	3	0.910664	0
ENC1	8469.XP_007064556.1	Ectoderm-neural cortex protein 1 isoform X1	0	0	0	0	0	0	0	Infinity	0
HYAL2	8469.XP_007061891.1	Hyaluronoglucosaminidase; Hyaluronidase-2	1.5	0	0.666667	0	1	2	2	0.75	0
HNF4A	8469.XP_007067351.1	Hepatocyte nuclear factor 4-alpha isoform X1	6.37727	0	0.156807	0	1	14	10	0.937474	0
SPTLC1	8469.XP_007056857.1	Serine palmitoyltransferase long chain base subunit 1; Serine palmitoyltransferase 1	7.91404	0	0.126358	0	1	14	5	0.919604	0
UY3_10111	8469.XP_007063126.1	Alpha-(1	0	0	0	0	0	0	0	Infinity	0
BABAM1	8469.XP_007072115.1	BRISC and BRCA1-A complex member 1 isoform X1	5.36772	0	0.186299	1	3	12	10.6667	0.949213	0
PTPRG	8469.XP_007066007.1	Receptor-type tyrosine-protein phosphatase gamma	6.37918	0	0.15676	0	1	14	13	0.937451	0
PTPRF	8469.XP_007061575.1	Receptor-type tyrosine-protein phosphatase F	0	0	0	0	0	0	0	Infinity	0
AP2A2	8469.XP_007059785.1	AP-2 complex subunit alpha-2; Derived by automated computational analysis using gene prediction method: Gnomon. Supporting evidence includes similarity to: 16 ESTs	5.32569	0.00990811	0.187769	0.3	5	13	4.6	0.949701	45470
PCSK6	8469.XP_007053597.1	Proprotein convertase subtilisin/kexin type 6; Belongs to the peptidase S8 family.	1	0	1	0	1	1	1	1	0
IKBKAP	8469.XP_007057994.1	Elongator complex protein 1; Acts as subunit of the RNA polymerase II elongator complex	4.86915	0.00331245	0.205375	0.5	5	12	32.4	0.95501	47740
IDE	8469.XP_007053130.1	Insulin-degrading enzyme; Belongs to the peptidase M16 family.	6.37918	0	0.15676	0	1	14	13	0.937451	0
BRCA1	8469.XP_007054809.1	Breast cancer type 1 susceptibility protein homolog	4.41165	0.0184358	0.226672	0.257143	21	11	22.8571	0.96033	181292
PTPRK	8469.XP_007060838.1	Receptor-type tyrosine-protein phosphatase kappa-like isoform X1	0	0	0	0	0	0	0	Infinity	0
N4BP2L1	8469.XP_007066047.1	NEDD4-binding protein 2-like 1	0	0	0	0	0	0	0	Infinity	0
MIA3	8469.XP_007070514.1	Melanoma inhibitory activity protein 3; The sequence of the model RefSeq protein was modified relative to its source genomic sequence to represent the inferred complete CDS: substituted 2 bases at 2 genomic stop codons	6.83381	0	0.146331	0	1	14	3	0.932165	0
PTPRM	8469.XP_007062385.1	Receptor-type tyrosine-protein phosphatase mu isoform X1	0	0	0	0	0	0	0	Infinity	0
PTPRO	8469.XP_007060625.1	Receptor-type tyrosine-protein phosphatase O; Derived by automated computational analysis using gene prediction method: Gnomon. Supporting evidence includes similarity to: 4 mRNAs	0	0	0	0	0	0	0	Infinity	0
MOGAT1	8469.XP_007058246.1	2-acylglycerol O-acyltransferase 1	9.98185	0.00380583	0.100182	0.6	5	16	4	0.89556	104224
XP_007055496.1	8469.XP_007055496.1	Uncharacterized protein LOC102947069	0	0	0	0	0	0	0	Infinity	0
FKBP15	8469.XP_007067748.1	Peptidylprolyl isomerase; FK506-binding protein 15	4.77746	0.0145107	0.209316	0.741667	16	12	26.5	0.956076	178730
PTPRS	8469.XP_007072156.1	Receptor-type tyrosine-protein phosphatase S	0	0	0	0	0	0	0	Infinity	0
INTS8	8469.XP_007067765.1	Integrator complex subunit 8; Derived by automated computational analysis using gene prediction method: Gnomon. Supporting evidence includes similarity to: 2 mRNAs	0	0	0	0	0	0	0	Infinity	0
MKX	8469.XP_007064342.1	Homeobox protein Mohawk	0	0	0	0	0	0	0	Infinity	0
COL9A3	8469.XP_007072742.1	Collagen type IX alpha 3 chain; The sequence of the model RefSeq protein was modified relative to its source genomic sequence to represent the inferred complete CDS: substituted 1 base at 1 genomic stop codon	6.22063	0	0.160755	0	1	13	2	0.939295	0
LRRN1	8469.XP_007061344.1	Leucine-rich repeat neuronal protein 1	0	0	0	0	0	0	0	Infinity	0
COL9A1	8469.XP_007070614.1	Collagen type IX alpha 1 chain; Derived by automated computational analysis using gene prediction method: Gnomon. Supporting evidence includes similarity to: 6 Proteins	5.22159	0.00191022	0.191513	0	2	12	29	0.950912	13778
WNK1	8469.XP_007070862.1	WNK lysine deficient protein kinase 1; The sequence of the model RefSeq protein was modified relative to its source genomic sequence to represent the inferred complete CDS: inserted 2 bases in 1 codon	1.33333	0.666667	0.75	0	2	2	1.5	0.833333	4
PPP1R1A	8469.XP_007070988.1	Protein phosphatase 1 regulatory subunit 1A	6.42789	0	0.155572	0	1	14	7	0.936885	0
ARMC10	8469.XP_007063861.1	Armadillo repeat-containing protein 10	1	0	1	0	1	1	1	1	0
SNW1	8469.XP_007067480.1	SNW domain-containing protein 1; Derived by automated computational analysis using gene prediction method: Gnomon. Supporting evidence includes similarity to: 14 ESTs	5.03916	0.00719322	0.198446	0.461538	14	12	11.8571	0.953033	46944
ANLN	8469.XP_007065950.1	Actin-binding protein anillin; The sequence of the model RefSeq protein was modified relative to its source genomic sequence to represent the inferred complete CDS: deleted 2 bases in 1 codon	4.58644	0.00891696	0.218034	0.74	25	12	43.44	0.958297	127920
ICK	8469.XP_007055120.1	Intestinal cell kinase; Serine/threonine-protein kinase ICK	0	0	0	0	0	0	0	Infinity	0
ATP4B	8469.XP_007063891.1	Potassium-transporting ATPase subunit beta; The sequence of the model RefSeq protein was modified relative to its source genomic sequence to represent the inferred complete CDS: substituted 1 base at 1 genomic stop codon	0	0	0	0	0	0	0	Infinity	0
UY3_16026	8469.XP_007069327.1	Phosphatidylcholine-sterol acyltransferase-like	1	0	1	0	1	1	1	1	0
XRCC1	8469.XP_007053851.1	DNA repair protein XRCC1	5.04107	0.000706513	0.198371	0.380952	7	12	17.4286	0.953011	11304
RASSF8	8469.XP_007063060.1	Ras association domain-containing protein 8	5.93314	0.00762627	0.168545	0	3	13	2	0.942638	42904
MICAL3	8469.XP_007070879.1	Protein-methionine sulfoxide oxidase MICAL3	0	0	0	0	0	0	0	Infinity	0
ST8SIA1	8469.XP_007071273.1	alpha-N-acetylneuraminide alpha-2	9.31996	0.00756757	0.107297	0.3	5	16	3.6	0.903256	186846
WWTR1	8469.XP_007057445.1	WW domain-containing transcription regulator protein 1; The sequence of the model RefSeq protein was modified relative to its source genomic sequence to represent the inferred complete CDS: deleted 1 base in 1 codon	8.33906	0.000943057	0.119918	0	2	15	2.5	0.914662	17622
PPP1R26	8469.XP_007061063.1	Protein phosphatase 1 regulatory subunit 26	0	0	0	0	0	0	0	Infinity	0
SEC31A	8469.XP_007065698.1	SEC31 homolog A	6.1767	0.00649037	0.161899	0.5	4	14	3.5	0.939806	35710
AAR2	8469.XP_007057229.1	Band 4.1-like protein 1; Protein AAR2 homolog	5.75454	0	0.173776	0	1	13	26	0.944715	0
PAG1	8469.XP_007052999.1	Phosphoprotein associated with glycosphingolipid-enriched microdomains 1	0	0	0	0	0	0	0	Infinity	0
RAB11FIP3	8469.XP_007054586.1	Rab11 family-interacting protein 3	9.64374	0.00191022	0.103694	0	2	17	2	0.899491	30168
N4BP2	8469.XP_007066477.1	NEDD4-binding protein 2	0	0	0	0	0	0	0	Infinity	0
ARSD	8469.XP_007063298.1	Arylsulfatase D	0	0	0	0	0	0	0	Infinity	0
SNX9	8469.XP_007063695.1	Sorting nexin-9	7.23782	0.00191022	0.138163	0	2	14	2	0.927467	15774
DHX38	8469.XP_007062500.1	Pre-mRNA-splicing factor ATP-dependent RNA helicase PRP16; Derived by automated computational analysis using gene prediction method: Gnomon. Supporting evidence includes similarity to: 1 mRNA	5.36199	0.000329181	0.186498	0.622222	10	13	13.6	0.949279	3892
ERI2	8469.XP_007064426.1	ERI1 exoribonuclease 2	1	0	1	0	1	1	1	1	0
SI	8469.XP_007055582.1	Maltase-glucoamylase	5.94651	0.00692432	0.168166	0.4	5	14	7.2	0.942482	38048
MIER2	8469.XP_007072264.1	Mesoderm induction early response protein 2	0	0	0	0	0	0	0	Infinity	0
TSPAN9	8469.XP_007055694.1	Tetraspanin; Derived by automated computational analysis using gene prediction method: Gnomon. Supporting evidence includes similarity to: 1 mRNA	0	0	0	0	0	0	0	Infinity	0
ANKH	8469.XP_007065088.1	Progressive ankylosis protein	0	0	0	0	0	0	0	Infinity	0
DHX33	8469.XP_007054251.1	Putative ATP-dependent RNA helicase DHX33	5.11939	0.0105353	0.195336	0.536797	22	12	23.0455	0.9521	120378
APH1A	8469.XP_007068194.1	Gamma-secretase subunit APH-1A	5.68386	0	0.175937	1	3	13	6.66667	0.945537	0
OSGEP	8469.XP_007072049.1	O-sialoglycoprotein endopeptidase; Probable tRNA N6-adenosine threonylcarbamoyltransferase	5.24546	0.0309925	0.190641	0	5	13	5	0.950634	400952
PCDH19	8469.XP_007063972.1	Protocadherin-19	0	0	0	0	0	0	0	Infinity	0
BRCC3	8469.XP_007056300.1	Lys-63-specific deubiquitinase BRCC36	5.234	0.00431055	0.191058	0.4	6	12	7	0.950767	24102
PTTG1IP	8469.XP_007052704.1	Pituitary tumor-transforming gene 1 protein-interacting protein	0	0	0	0	0	0	0	Infinity	0
PIK3R3	8469.XP_007070038.1	Phosphatidylinositol 3-kinase regulatory subunit gamma	5.085	0.00596937	0.196657	0.242424	12	12	9.58333	0.9525	109500
WNK4	8469.XP_007054841.1	Amine oxidase; Serine/threonine-protein kinase WNK4	2	0	0.5	0	1	3	2	0.5	0
CTR9	8469.XP_007057204.1	RNA polymerase-associated protein CTR9 homolog	5.88539	0.00692542	0.169912	0.333333	4	14	4.75	0.943193	25916
L3MBTL2	8469.XP_007053373.1	Lethal(3)malignant brain tumor-like protein 2	7.80993	0	0.128042	0	1	15	5	0.920815	0
L3MBTL3	8469.XP_007060841.1	Lethal(3)malignant brain tumor-like protein 3-like	0	0	0	0	0	0	0	Infinity	0
GCDH	8469.XP_007058288.1	glutaryl-CoA dehydrogenase	7.32283	0	0.136559	1	2	13	5.5	0.926479	0
XP_007066641.1	8469.XP_007066641.1	Transcriptional repressor NF-X1-like	0	0	0	0	0	0	0	Infinity	0
KIF20B	8469.XP_007071652.1	Kinesin-like protein KIF20B; Belongs to the TRAFAC class myosin-kinesin ATPase superfamily. Kinesin family.	4.8233	8.83055e-05	0.207327	0.6	6	12	37.8333	0.955543	3612
KIF20A	8469.XP_007065040.1	Kinesin-like protein KIF20A; Belongs to the TRAFAC class myosin-kinesin ATPase superfamily. Kinesin family.	4.44699	0.00173767	0.224871	0.566596	44	12	36.1818	0.959919	54512
UY3_11577	8469.XP_007064703.1	T-lymphocyte surface antigen Ly-9-like	0	0	0	0	0	0	0	Infinity	0
LACTB2	8469.XP_007054105.1	Lactamase beta 2; Derived by automated computational analysis using gene prediction method: Gnomon. Supporting evidence includes similarity to: 8 Proteins	0	0	0	0	0	0	0	Infinity	0
SFRP2	8469.XP_007071322.1	Secreted frizzled-related protein 2	1.5	0.5	0.666667	0	2	2	2	0.833333	6
GNPAT	8469.XP_007071181.1	Dihydroxyacetone phosphate acyltransferase	8.00573	0.0151795	0.124911	0.333333	3	14	3.66667	0.918538	286528
DHX40	8469.XP_007057704.1	Putative ATP-dependent RNA helicase DHX40; The sequence of the model RefSeq protein was modified relative to its source genomic sequence to represent the inferred complete CDS: inserted 1 base in 1 codon	5.4766	0.00198443	0.182595	0.3	5	13	16.6	0.947947	17530
GCAT	8469.XP_007069169.1	2-amino-3-ketobutyrate coenzyme A ligase	6.13181	0.0233366	0.163084	0.333333	3	13	4.33333	0.940328	330364
ANK1	8469.XP_007064257.1	Ankyrin 1; The sequence of the model RefSeq protein was modified relative to its source genomic sequence to represent the inferred complete CDS: inserted 1 base in 1 codon	0	0	0	0	0	0	0	Infinity	0
VWA5B1	8469.XP_007067797.1	Von Willebrand factor A domain-containing protein 5B1; The sequence of the model RefSeq protein was modified relative to its source genomic sequence to represent the inferred complete CDS: inserted 1 base in 1 codon; deleted 2 bases in 1 codon; substituted 1 base at 1 genomic stop codon	0	0	0	0	0	0	0	Infinity	0
ANK3	8469.XP_007054896.1	Ankyrin-3	0	0	0	0	0	0	0	Infinity	0
TM4SF4	8469.XP_007057504.1	Transmembrane 4 L6 family member 4	0	0	0	0	0	0	0	Infinity	0
HNF1B	8469.XP_007057672.1	Hepatocyte nuclear factor 1-beta isoform X1	0	0	0	0	0	0	0	Infinity	0
SCAF11	8469.XP_007064048.1	Protein SCAF11	6.05731	0	0.16509	1	2	13	4.5	0.941194	0
MIA	8469.XP_007072794.1	Melanoma-derived growth regulatory protein; The sequence of the model RefSeq protein was modified relative to its source genomic sequence to represent the inferred complete CDS: substituted 1 base at 1 genomic stop codon	0	0	0	0	0	0	0	Infinity	0
ENTPD2	8469.XP_007072849.1	Ectonucleoside triphosphate diphosphohydrolase 2; The sequence of the model RefSeq protein was modified relative to its source genomic sequence to represent the inferred complete CDS: deleted 1 base in 1 codon; Belongs to the GDA1/CD39 NTPase family.	5.23018	0	0.191198	0	1	12	50	0.950812	0
ST6GAL2	8469.XP_007054673.1	ST6 beta-galactoside alpha-2	7.64565	0.00848178	0.130793	0.333333	3	16	3	0.922725	142356
ARSA	8469.XP_007066792.1	Arylsulfatase A-like	5.35244	0	0.186831	1	2	12	8.5	0.94939	0
TMPO	8469.XP_007069299.1	Lamina-associated polypeptide 2	6.70392	0.00191022	0.149167	0	2	14	2	0.933675	16342
SEC63	8469.XP_007057462.1	Translocation protein SEC63 homolog	7.2703	0.002559	0.137546	0.166667	4	15	4.25	0.92709	17572
CCNL1	8469.XP_007067141.1	Cyclin-L1; Derived by automated computational analysis using gene prediction method: Gnomon. Supporting evidence includes similarity to: 1 mRNA	4.96657	0.00342099	0.201346	0.5	5	12	41.4	0.953877	30158
ACAD11	8469.XP_007064366.1	acyl-CoA dehydrogenase family member 11 isoform X1	0	0	0	0	0	0	0	Infinity	0
UY3_05488	8469.XP_007058224.1	Multidrug resistance-associated protein 1-like	0	0	0	0	0	0	0	Infinity	0
UY3_12114	8469.XP_007065272.1	Probable ergosterol biosynthetic protein 28 isoform X1	11.51	0.000953284	0.0868808	0.666667	3	18	3.33333	0.87779	14988
RASSF3	8469.XP_007065761.1	Ras association domain-containing protein 3; Derived by automated computational analysis using gene prediction method: Gnomon. Supporting evidence includes similarity to: 14 Proteins	0	0	0	0	0	0	0	Infinity	0
GCC2	8469.XP_007054670.1	GRIP and coiled-coil domain containing 2; Derived by automated computational analysis using gene prediction method: Gnomon. Supporting evidence includes similarity to: 3 mRNAs	5.68481	0.0267693	0.175907	0	5	13	4	0.945525	220846
ZDHHC7	8469.XP_007059340.1	Palmitoyltransferase ZDHHC7	0	0	0	0	0	0	0	Infinity	0
KEAP1	8469.XP_007055954.1	Kelch like ECH associated protein 1; The sequence of the model RefSeq protein was modified relative to its source genomic sequence to represent the inferred complete CDS: deleted 2 bases in 1 codon	6.60363	0	0.151432	1	2	14	6	0.934842	0
THUMPD3	8469.XP_007059998.1	THUMP domain-containing protein 3; Derived by automated computational analysis using gene prediction method: Gnomon. Supporting evidence includes similarity to: 1 EST	6.98854	0	0.143091	0	1	15	3	0.930366	0
AHCYL2	8469.XP_007069852.1	Adenosylhomocysteinase like 2; Putative adenosylhomocysteinase 3	6.24642	0.0043368	0.160092	0.166667	4	14	2.75	0.938995	26338
SLC25A33	8469.XP_007072856.1	Solute carrier family 25 member 33; The sequence of the model RefSeq protein was modified relative to its source genomic sequence to represent the inferred complete CDS: inserted 1 base in 1 codon	5.99809	0	0.16672	0	1	14	31	0.941883	0
SEC24C	8469.XP_007053293.1	SEC24 homolog C	6.93314	0.00103604	0.144235	0.666667	4	15	3.75	0.93101	7054
XP_007057138.1	8469.XP_007057138.1	The sequence of the model RefSeq protein was modified relative to its source genomic sequence to represent the inferred complete CDS: deleted 1 base in 1 codon	0	0	0	0	0	0	0	Infinity	0
XP_007066303.1	8469.XP_007066303.1	Testis-expressed sequence 30 protein-like	0	0	0	0	0	0	0	Infinity	0
CTCFL	8469.XP_007059918.1	Transcriptional repressor CTCFL	0	0	0	0	0	0	0	Infinity	0
BAIAP2	8469.XP_007056112.1	BAI1 associated protein 2; Derived by automated computational analysis using gene prediction method: Gnomon. Supporting evidence includes similarity to: 1 mRNA	7.15568	0.00208185	0.139749	0.333333	4	15	3	0.928422	15182
MERTK	8469.XP_007059036.1	Tyrosine-protein kinase Mer	1.5	0	0.666667	0	1	2	2	0.75	0
RPL23A	8469.XP_007057750.1	60S ribosomal protein L23a isoform X1	4.69341	0.0233689	0.213065	0.31	25	12	14.84	0.957053	205900
TIE1	8469.XP_007061572.1	Tyrosine-protein kinase receptor Tie-1	0	0	0	0	0	0	0	Infinity	0
SEC24A	8469.XP_007053634.1	The sequence of the model RefSeq protein was modified relative to its source genomic sequence to represent the inferred complete CDS: substituted 1 base at 1 genomic stop codon	7.07068	0	0.141429	1	3	15	4	0.929411	0
DUT	8469.XP_007066924.1	Deoxyuridine 5'-triphosphate nucleotidohydrolase	4.14709	0.0479311	0.241133	0.436937	37	11	34.8919	0.963406	604536
METAP1D	8469.XP_007056766.1	Methionine aminopeptidase 1D	1	0	1	0	1	1	1	1	0
SLC12A3	8469.XP_007070634.1	Solute carrier family 12 member 3 isoform X1	1.33333	0.666667	0.75	0	2	2	1.5	0.833333	4
LINGO1	8469.XP_007068433.1	Leucine-rich repeat and immunoglobulin-like domain-containing nogo receptor-interacting protein 1 isoform X1	8.92073	0	0.112099	1	2	16	3.5	0.907899	0
SLC25A24	8469.XP_007055270.1	Calcium-binding mitochondrial carrier protein SCaMC-1; Belongs to the mitochondrial carrier (TC 2.A.29) family.	0	0	0	0	0	0	0	Infinity	0
SLITRK6	8469.XP_007060510.1	SLIT and NTRK-like protein 6-like	0	0	0	0	0	0	0	Infinity	0
FCHO2	8469.XP_007059299.1	FCH domain only protein 2	8.20821	0.000329769	0.121829	0	2	16	3	0.916184	938
SH3BP2	8469.XP_007060087.1	SH3 domain-binding protein 2; Derived by automated computational analysis using gene prediction method: Gnomon. Supporting evidence includes similarity to: 1 mRNA	0	0	0	0	0	0	0	Infinity	0
TP53INP2	8469.XP_007057221.1	Tumor protein p53-inducible nuclear protein 2	0	0	0	0	0	0	0	Infinity	0
XP_007063602.1	8469.XP_007063602.1	Uncharacterized protein LOC102934640	0	0	0	0	0	0	0	Infinity	0
PTPRZ1	8469.XP_007053187.1	Receptor-type tyrosine-protein phosphatase zeta	1	0	1	0	1	1	1	1	0
SLC25A28	8469.XP_007059141.1	Mitoferrin-2; Belongs to the mitochondrial carrier (TC 2.A.29) family.	0	0	0	0	0	0	0	Infinity	0
NCLN	8469.XP_007072270.1	Nicalin	6.25024	0.000549878	0.159994	0	2	13	5	0.938951	3184
SLC25A27	8469.XP_007061765.1	Solute carrier family 25 member 27; The sequence of the model RefSeq protein was modified relative to its source genomic sequence to represent the inferred complete CDS: substituted 1 base at 1 genomic stop codon	0	0	0	0	0	0	0	Infinity	0
PRIMPOL	8469.XP_007054525.1	DNA-directed primase/polymerase protein	5.22827	0	0.191268	1	2	12	26	0.950834	0
CXXC5	8469.XP_007059230.1	CXXC-type zinc finger protein 5 isoform X1	0	0	0	0	0	0	0	Infinity	0
HSD17B12	8469.XP_007060830.1	Estradiol 17-beta-dehydrogenase 12	10.5186	0	0.0950695	1	2	17	3.5	0.889318	0
LRP2	8469.XP_007056775.1	Low-density lipoprotein receptor-related protein 2; The sequence of the model RefSeq protein was modified relative to its source genomic sequence to represent the inferred complete CDS: inserted 1 base in 1 codon; substituted 1 base at 1 genomic stop codon	7.23018	0.00371145	0.138309	0	3	15	2.33333	0.927556	18826
PRCP	8469.XP_007060650.1	Lysosomal Pro-X carboxypeptidase	0	0	0	0	0	0	0	Infinity	0
LRP3	8469.XP_007058707.1	Low-density lipoprotein receptor-related protein 3	6.32856	0	0.158014	0	1	14	6	0.93804	0
KATNB1	8469.XP_007063336.1	Katanin p80 WD40 repeat-containing subunit B1	0	0	0	0	0	0	0	Infinity	0
LRP4	8469.XP_007069808.1	Low-density lipoprotein receptor-related protein 4	8.47373	0.00191022	0.118012	0	2	16	2.5	0.913096	14492
ZBTB43	8469.XP_007060997.1	Zinc finger and BTB domain-containing protein 43	0	0	0	0	0	0	0	Infinity	0
PPM1H	8469.XP_007064068.1	Protein phosphatase 1H	1	0	1	0	1	1	1	1	0
PID1	8469.XP_007055099.1	PTB-containing	0	0	0	0	0	0	0	Infinity	0
XP_007059539.1	8469.XP_007059539.1	ALS2 C-terminal-like protein-like	1	0	1	0	1	1	1	1	0
COL15A1	8469.XP_007058963.1	Collagen alpha-1(XV) chain	0	0	0	0	0	0	0	Infinity	0
SEC23A	8469.XP_007065303.1	Protein transport protein Sec23A isoform X1	6.93314	0.00103604	0.144235	0.666667	4	15	3.75	0.93101	7054
NDUFB9	8469.XP_007065813.1	NADH:ubiquinone oxidoreductase subunit B9; NADH dehydrogenase [ubiquinone] 1 beta subcomplex subunit 9 isoform X1	6.41738	0.0152422	0.155827	0.333333	3	12	6.33333	0.937007	57290
SLC47A2	8469.XP_007057805.1	Solute carrier family 47 member 2; The sequence of the model RefSeq protein was modified relative to its source genomic sequence to represent the inferred complete CDS: substituted 1 base at 1 genomic stop codon	0	0	0	0	0	0	0	Infinity	0
RBPJL	8469.XP_007057276.1	Recombining binding protein suppressor of hairless-like protein	5.08214	0.00892068	0.196768	0.166667	4	13	9.5	0.952533	43998
ST6GALNAC5	8469.XP_007062629.1	Alpha-N-acetylgalactosaminide alpha-2	11.2894	0	0.0885787	0	1	18	4	0.880356	0
SLC25A11	8469.XP_007054117.1	Mitochondrial 2-oxoglutarate/malate carrier protein; Belongs to the mitochondrial carrier (TC 2.A.29) family.	7.51194	0	0.133121	0	1	15	2	0.92428	0
SLC25A12	8469.XP_007056767.1	Calcium-binding mitochondrial carrier protein Aralar1; Belongs to the mitochondrial carrier (TC 2.A.29) family.	0	0	0	0	0	0	0	Infinity	0
UY3_08168	8469.XP_007061020.1	Crumbs like protein 2; Derived by automated computational analysis using gene prediction method: Gnomon. Supporting evidence includes similarity to: 1 mRNA	0	0	0	0	0	0	0	Infinity	0
XP_007068740.1	8469.XP_007068740.1	Translational activator of cytochrome c oxidase 1-like	0	0	0	0	0	0	0	Infinity	0
NPC2	8469.XP_007065345.1	Epididymal secretory protein E1	1.33333	0.666667	0.75	0	2	2	1.5	0.833333	4
NPC1	8469.XP_007057073.1	Niemann-Pick C1 protein; Derived by automated computational analysis using gene prediction method: Gnomon. Supporting evidence includes similarity to: 24 Proteins	2	0	0.5	0	1	3	2	0.5	0
SLC25A15	8469.XP_007068133.1	Mitochondrial ornithine transporter 1; Belongs to the mitochondrial carrier (TC 2.A.29) family.	0	0	0	0	0	0	0	Infinity	0
NT5C3A	8469.XP_007064413.1	5'-nucleotidase	4.78128	0.00123905	0.209149	0.444444	9	12	16.1111	0.956032	17736
ARNT	8469.XP_007068166.1	Aryl hydrocarbon receptor nuclear translocator; The sequence of the model RefSeq protein was modified relative to its source genomic sequence to represent the inferred complete CDS: deleted 2 bases in 1 codon	6.83572	0.00191022	0.14629	0	2	14	1.5	0.932143	14124
VPS37C	8469.XP_007071857.1	Vacuolar protein sorting-associated protein 37C	12.2703	0	0.0814976	0	1	18	4	0.86895	0
DST	8469.XP_007059958.1	Dystonin isoform X1	5.54823	0.00758073	0.180238	0	4	13	4.25	0.947114	41896
HSP90AA1	8469.XP_007062955.1	Heat shock protein HSP 90-alpha	5.01433	0.00791662	0.199429	0.178571	8	12	4.875	0.953322	44172
EMX2	8469.XP_007064285.1	Homeobox protein EMX2	0	0	0	0	0	0	0	Infinity	0
SPG11	8469.XP_007059576.1	Spastic paraplegia 11 (autosomal recessive); Spatacsin	1	1	1	0	2	1	1	1	2
ATP7A	8469.XP_007060223.1	Copper-transporting ATPase 1; The sequence of the model RefSeq protein was modified relative to its source genomic sequence to represent the inferred complete CDS: substituted 1 base at 1 genomic stop codon	0	0	0	0	0	0	0	Infinity	0
ERC1	8469.XP_007070865.1	ELKS/Rab6-interacting/CAST family member 1; Derived by automated computational analysis using gene prediction method: Gnomon. Supporting evidence includes similarity to: 3 Proteins	0	0	0	0	0	0	0	Infinity	0
MRPL9	8469.XP_007068214.1	39S ribosomal protein L9	5.46323	0.000848196	0.183042	0.666667	10	13	15.3	0.948102	28118
MDK	8469.XP_007069806.1	Midkine-A; Derived by automated computational analysis using gene prediction method: Gnomon. Supporting evidence includes similarity to: 15 Proteins	5.90162	0.00191022	0.169445	0	2	13	2	0.943004	10924
NADK2	8469.XP_007065823.1	UPF0465 protein C5orf33; NAD kinase 2	5.94938	0	0.168085	1	3	14	10	0.942449	0
EFCAB14	8469.XP_007061653.1	EF-hand calcium-binding domain-containing protein 14	0	0	0	0	0	0	0	Infinity	0
POMT1	8469.XP_007061106.1	Protein O-mannosyl-transferase 1; The sequence of the model RefSeq protein was modified relative to its source genomic sequence to represent the inferred complete CDS: substituted 1 base at 1 genomic stop codon	7.59408	0.000954197	0.131682	0.666667	3	15	3.66667	0.923325	22526
UY3_18075	8469.XP_007071423.1	D-beta-hydroxybutyrate dehydrogenase	7.74403	0	0.129132	0	1	14	5	0.921581	0
FLT1	8469.XP_007057952.1	Vascular endothelial growth factor receptor 1	4.7851	0.0229192	0.208982	0.145455	11	12	8.18182	0.955987	201032
PPP1R13B	8469.XP_007062985.1	Apoptosis-stimulating of p53 protein 1; Derived by automated computational analysis using gene prediction method: Gnomon. Supporting evidence includes similarity to: 12 ESTs	4.94174	0.00951457	0.202358	0	2	12	20.5	0.954166	53610
SLC25A1	8469.XP_007055078.1	Tricarboxylate transport protein	6.9809	0	0.143248	0	1	14	9	0.930455	0
NFE2L1	8469.XP_007062000.1	Nuclear factor erythroid 2-related factor 1; Belongs to the bZIP family.	6.532	0.000816579	0.153093	0.333333	3	13	4.66667	0.935674	4870
TUBGCP6	8469.XP_007056922.1	Gamma-tubulin complex component 6	5.2063	0.00357939	0.192075	0	3	12	24	0.951089	36148
TUBGCP5	8469.XP_007063269.1	Gamma-tubulin complex component; Gamma-tubulin complex is necessary for microtubule nucleation at the centrosome.	6.12894	0.00184943	0.16316	0	2	13	3	0.940361	17768
NFE2L3	8469.XP_007053731.1	Nuclear factor	7.93505	0	0.126023	0	1	15	2	0.91936	0
MDM2	8469.XP_007065896.1	E3 ubiquitin-protein ligase Mdm2 isoform X1	4.81853	0.00248757	0.207532	0.3	5	12	16.8	0.955598	45520
UY3_03567	8469.XP_007056258.1	Serine/threonine-protein kinase MST4-like	6.31614	0.000953284	0.158325	0.666667	3	13	3.33333	0.938184	7938
PTPRB	8469.XP_007054865.1	Receptor-type tyrosine-protein phosphatase beta isoform X1	0	0	0	0	0	0	0	Infinity	0
GGCT	8469.XP_007066538.1	Gamma-glutamylcyclotransferase	5.60936	0.00874166	0.178273	0.238095	7	13	4.71429	0.946403	45992
[truncated: 1,369 more rows]
