# Supplementary figures and images for: Tissue and Temperature-Specific RNA-Seq Analysis Reveals Genomic Versatility and Adaptive Potential in Wild Sea Turtle Hatchlings (Caretta caretta)
Source: MDPI journal article supplement (doi:10.3390/ani11113013), 2021-10-20

REVIGO Gene Ontology treemap

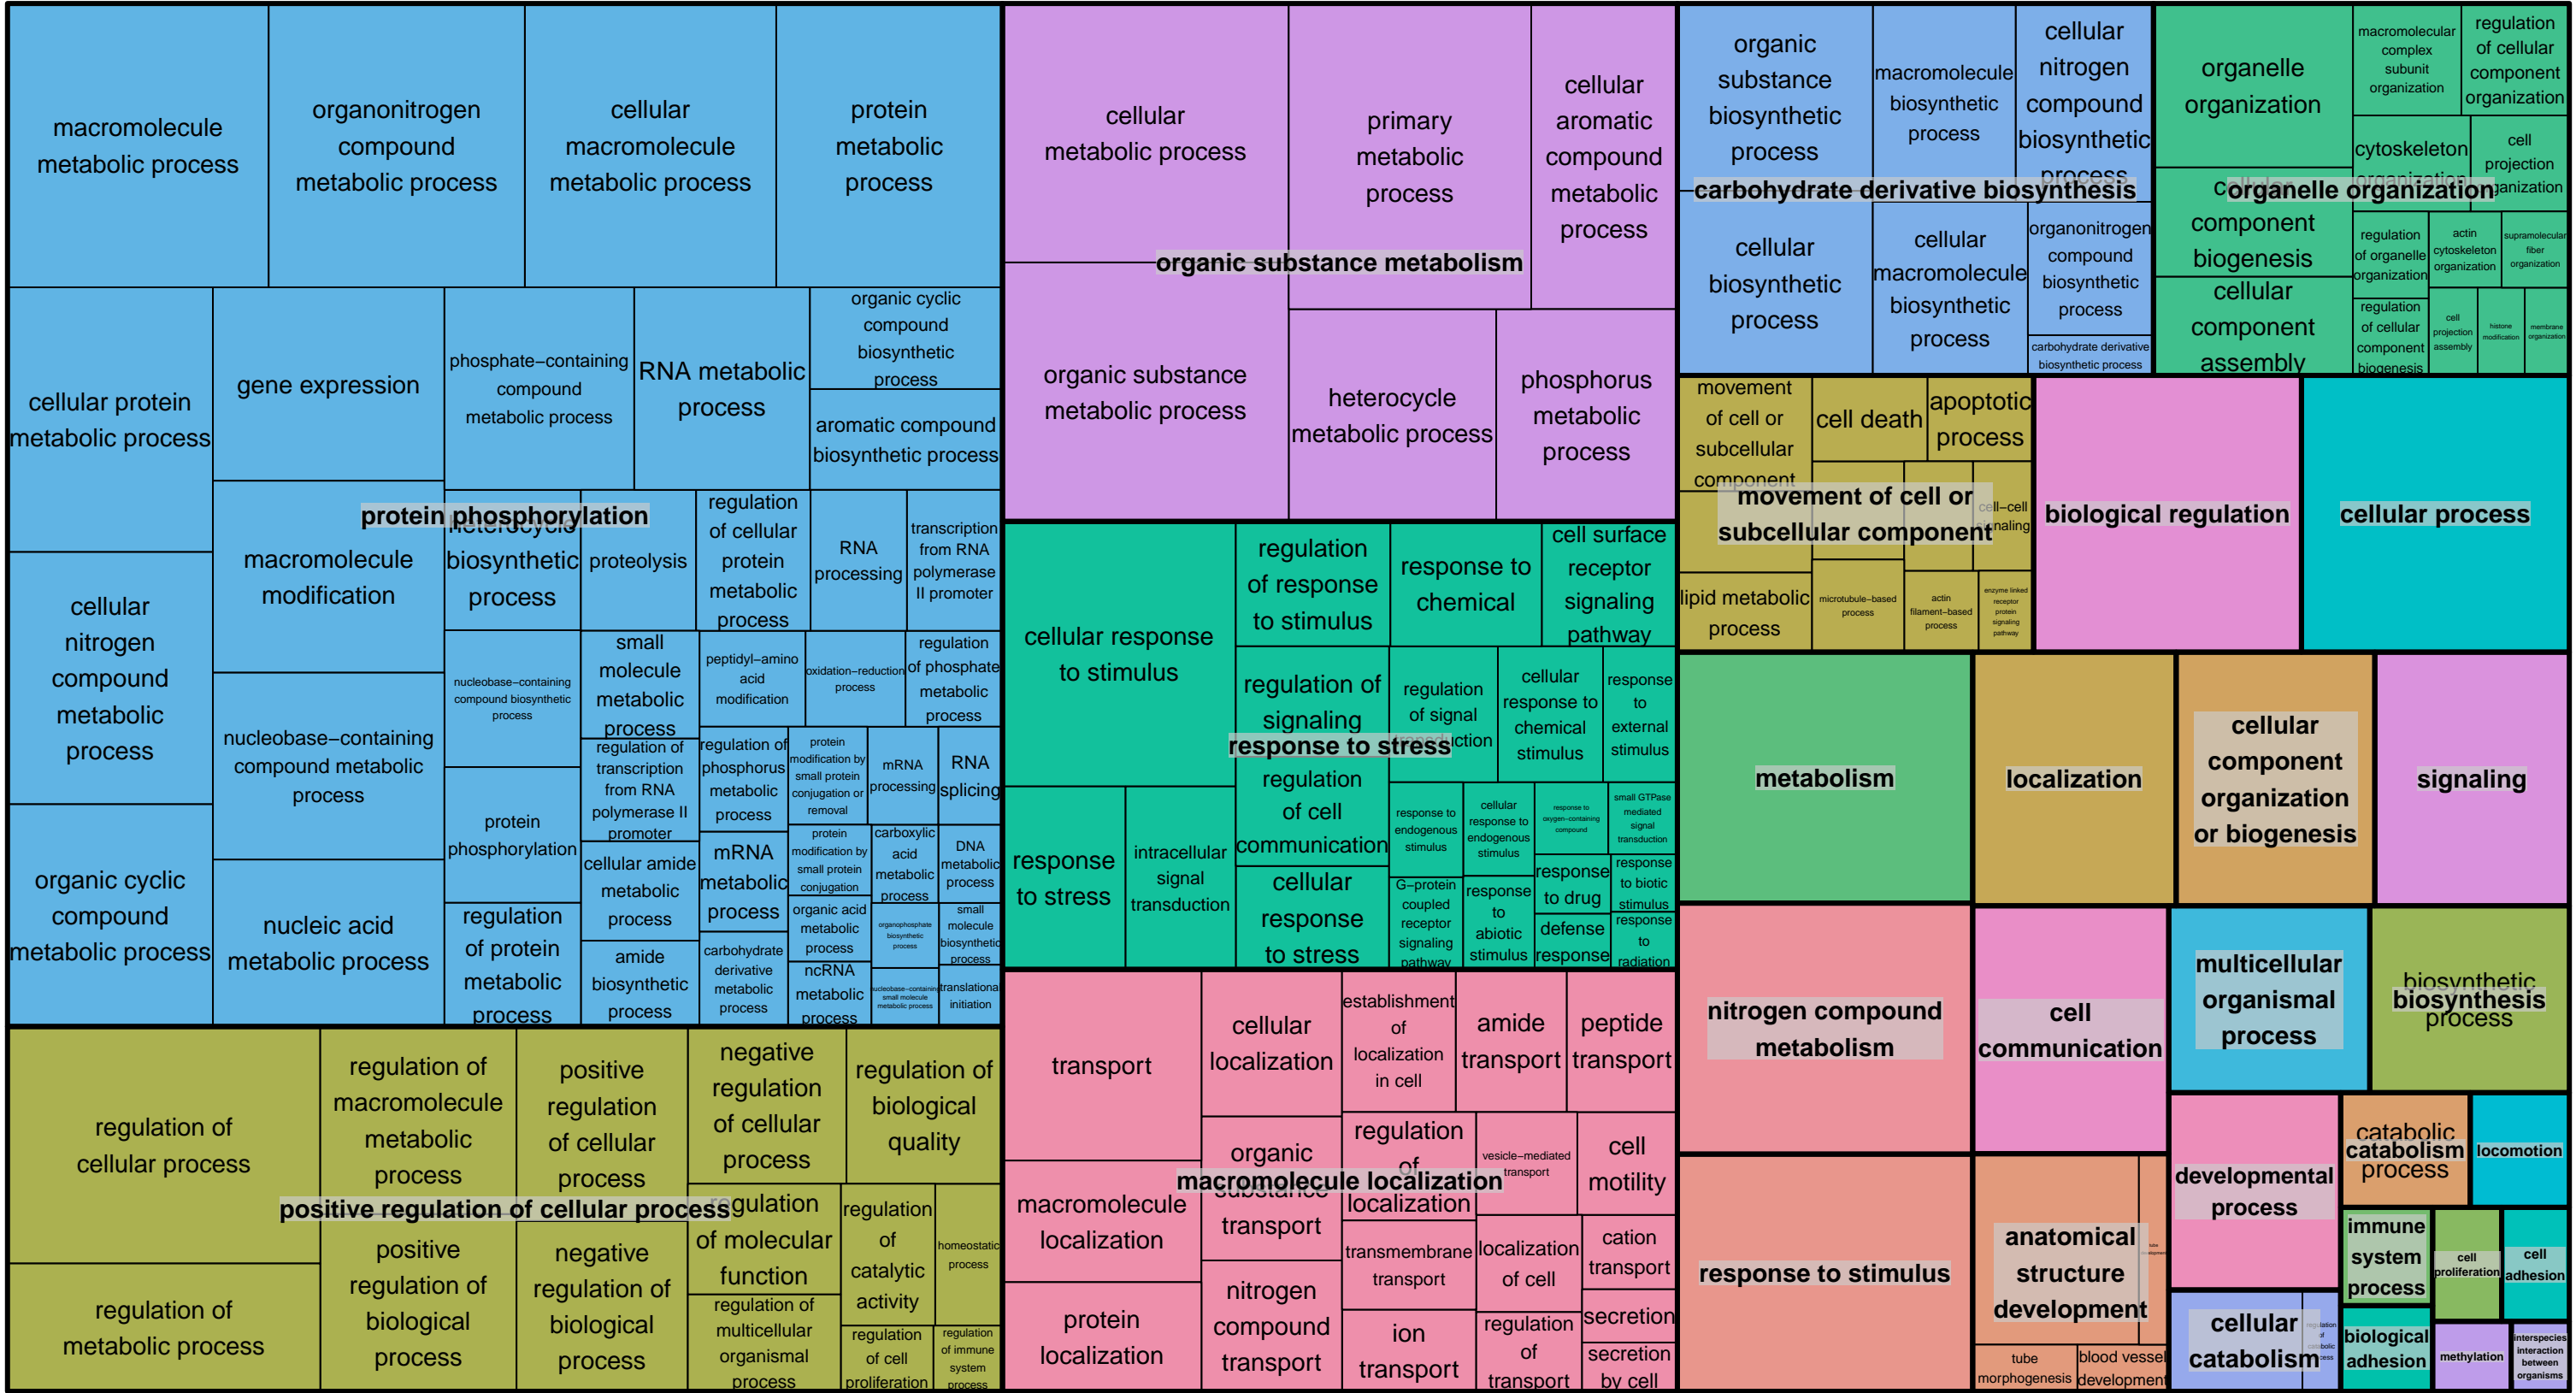

Supplement: s1 [file s1]

REVIGO Gene Ontology treemap

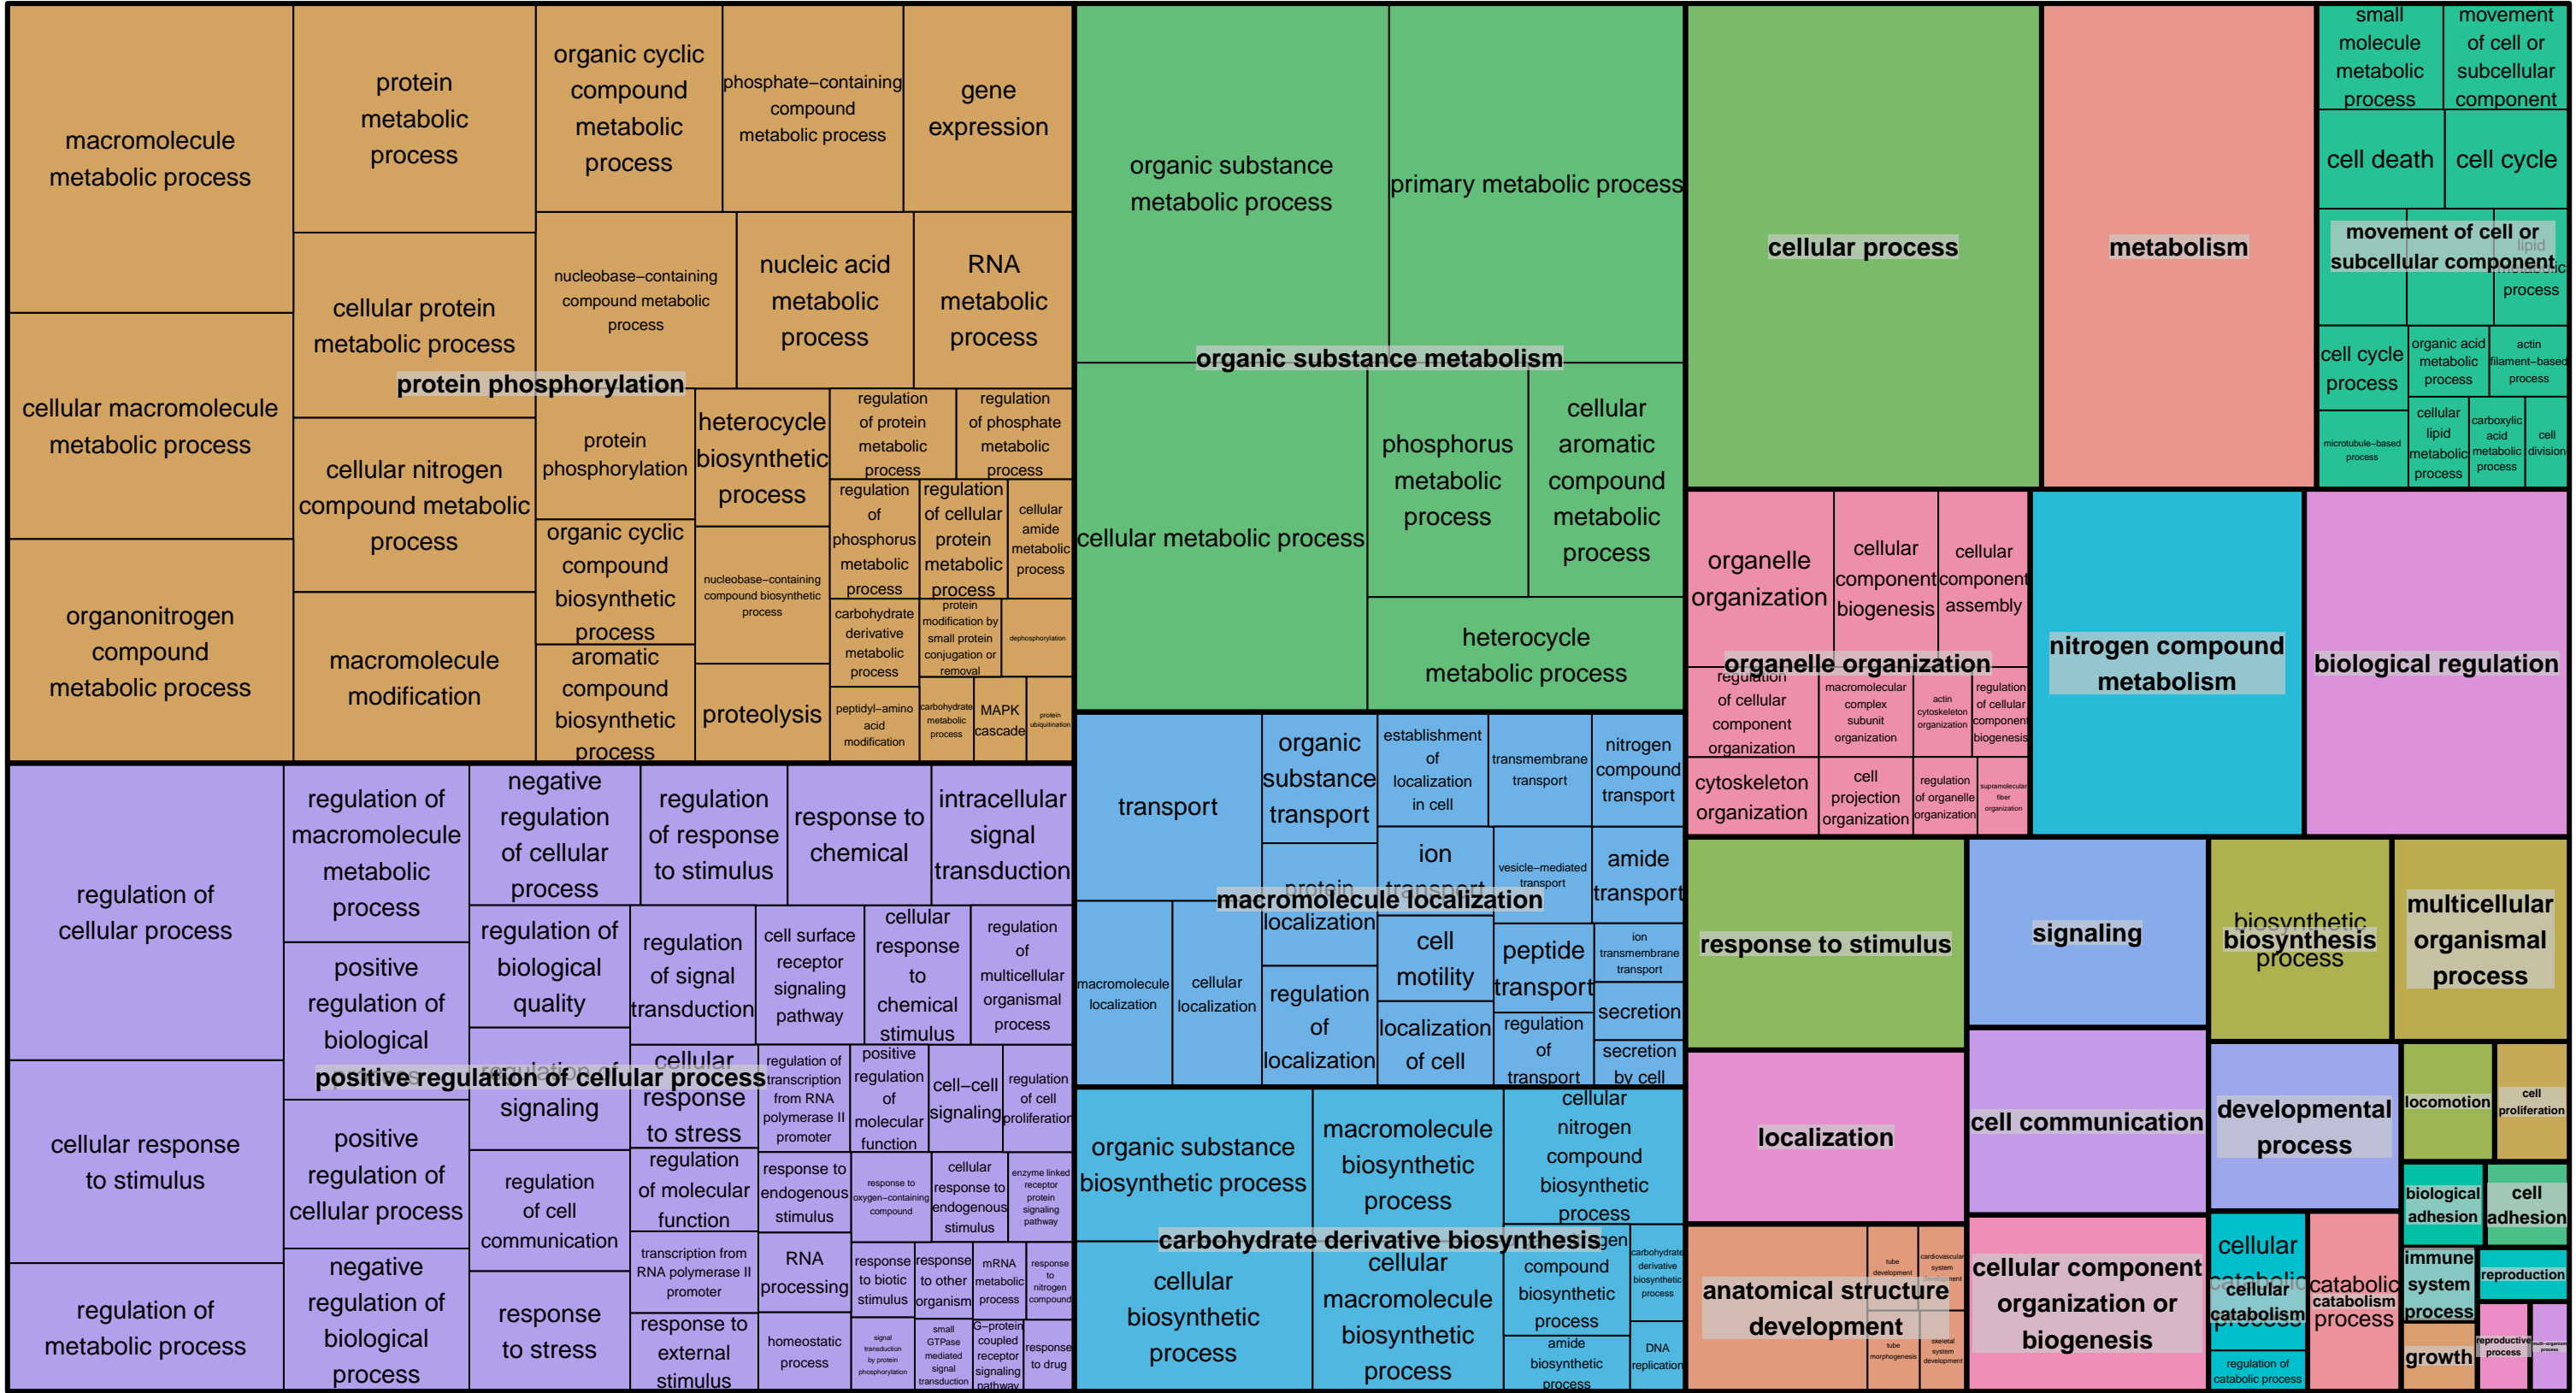

Supplement: s1 [file s1]

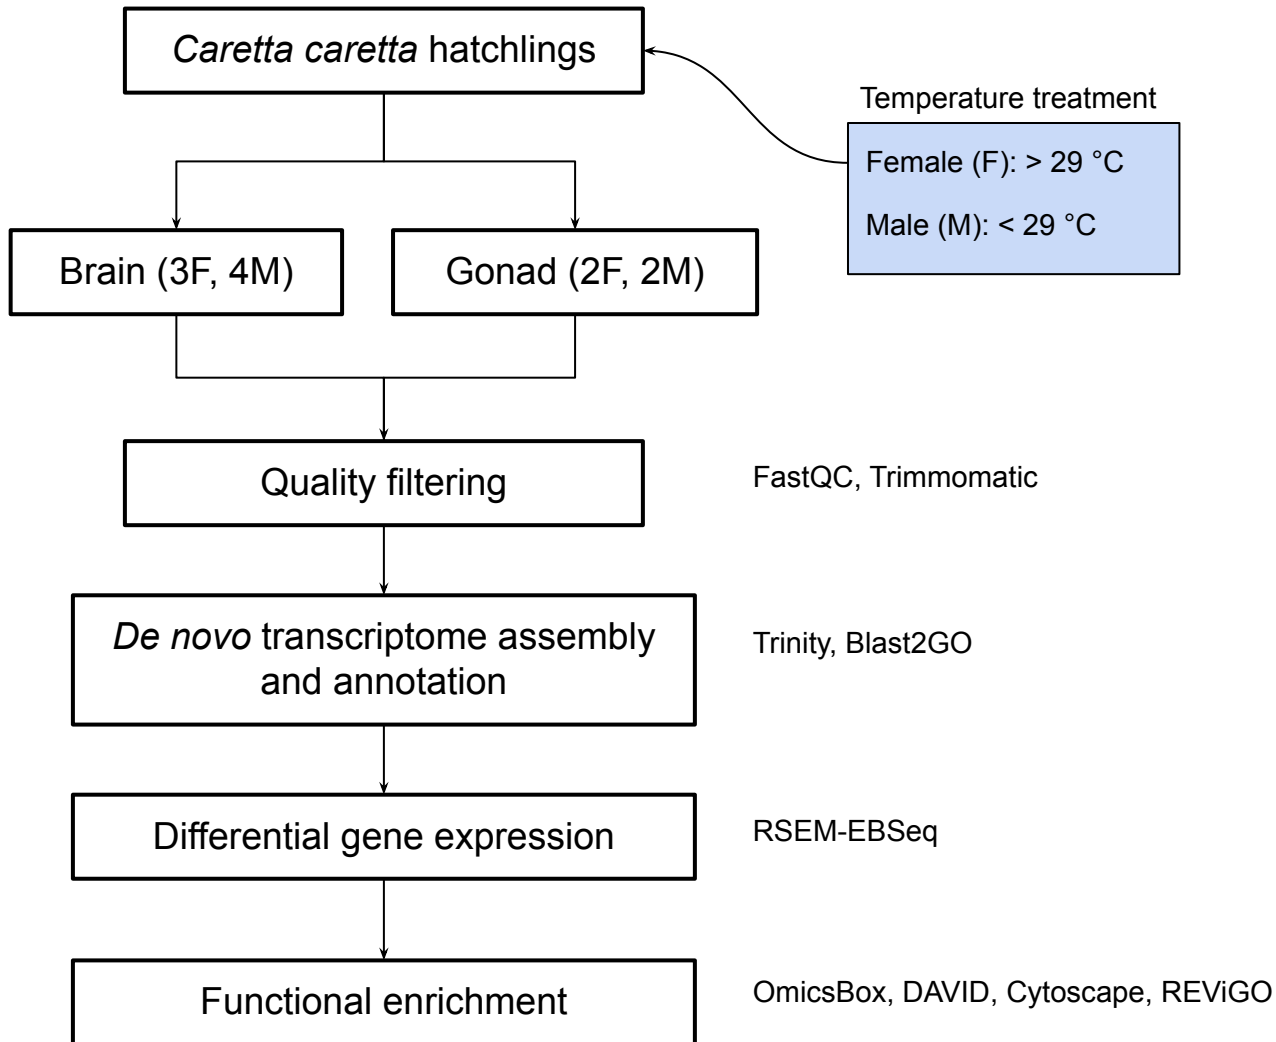

Supplement: s1 [file s1]
